# Supplementary material for: Comparative transcriptome analysis of equine alveolar macrophages
Source: PubMed Central journal article supplement (PMC5412682; doi:10.1111/evj.12584), 2016-07-09
Supplement: EVJ-49-375-s001.pdf [file EVJ-49-375-s001.pdf]

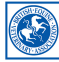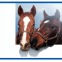

## Supplementary Item 1a: Genelist of 451 transcripts differentially expressed between AMs and PMs - with p adjusted value &lt;0.01 and fold change &gt;9

| Transcript ID | Gene_assignment                                                                            | Gene name                                        | Gene symbol  | p Value | Fold change | Description   |
|---------------|--------------------------------------------------------------------------------------------|--------------------------------------------------|--------------|---------|-------------|---------------|
| 15121321      | ENSECAT00000013628 // LOC100052888 // cholesterol 7-alpha-monooxygenase-like // --- //     | cholesterol 7-alpha-monooxygenase-like           | LOC100052888 | <0,01   | 49.5489     | AM up vs PM   |
| 15080122      | XM_001487907 // LOC100049847 // platelet glycoprotein 4-like // --- // 100049847 /// EN    | platelet glycoprotein 4-like                     | LOC100049847 | <0,01   | 38.3266     | AM up vs PM   |
| 15066795      | XM_001916447 // LOC100057831 // n-acylethanolamine-hydrolyzing acid amidase-like // --- // | n-acylethanolamine-hydrolyzing acid amidase-like | LOC100057831 | <0,01   | 25.7024     | AM up vs PM   |
| 15088442      | ENSECAT00000011655 // MCOLN2 // mucolipin 2 // --- // 100052719 /// XM_001496833 // MCO    | mucolipin 2                                      | MCOLN2       | <0,01   | 21.8081     | AM up vs PM   |
| 15126979      | NM_001111301 // TLR8 // toll-like receptor 8 // --- // 100054367 /// ENSECAT00000009327    | toll-like receptor 8                             | TLR8         | <0,01   | 20.9228     | AM up vs PM   |
| 14966871      | ---                                                                                        |                                                  |              | <0,01   | 17.1072     | AM up vs PM   |
| 15134514      | ---                                                                                        |                                                  |              | <0,01   | 16.2329     | AM up vs PM   |
| 15051976      | ENSECAT00000005057 // PTGR1 // prostaglandin reductase 1 // --- //                         | prostaglandin reductase 1                        | PTGR1        | <0,01   | 14.2633     | AM up vs PM   |
| 15023455      | XM_001501495 // LOC100071667 // complement C1q subcomponent subunit B-like // --- // 10    | complement C1q subcomponent subunit B-like       | LOC100071667 | <0,01   | 14.0384     | AM up vs PM   |
| 15100625      | ENSECAT00000015675 // PLBD1 // phospholipase B domain containing 1 // --- // 100066968     | phospholipase B domain containing 1              | PLBD1        | <0,01   | 11.7085     | AM up vs PM   |
| 14943095      | ENSECAT00000011152 // EGR2 // early growth response 2 // --- // 100062890 /// XM_001503    | early growth response 2                          | EGR2         | <0,01   | 10.7066     | AM up vs PM   |
| 15023462      | XM_001504261 // LOC100058097 // complement C1q subcomponent subunit A-like // --- // 10    | complement C1q subcomponent subunit A-like       | LOC100058097 | <0,01   | 10.5162     | AM up vs PM   |
| 14969419      | XM_001914718 // LOC100060647 // catalase-like // --- // 100060647 /// ENSECAT00000002124   | catalase-like                                    | LOC100060647 | <0,01   | 9.51748     | AM up vs PM   |
| 15023458      | XM_001504258 // LOC100058056 // complement C1q subcomponent subunit C-like // --- // 10    | complement C1q subcomponent subunit C-like       | LOC100058056 | <0,01   | 9.32528     | AM up vs PM   |
| 14939930      | ---                                                                                        |                                                  |              | <0,01   | -9.0112     | AM down vs PM |
| 14938040      | ---                                                                                        |                                                  |              | <0,01   | -9.09147    | AM down vs PM |
| 15131203      | ---                                                                                        |                                                  |              | <0,01   | -9.10315    | AM down vs PM |
| 14950082      | ---                                                                                        |                                                  |              | <0,01   | -9.12671    | AM down vs PM |
| 15087535      | ---                                                                                        |                                                  |              | <0,01   | -9.15312    | AM down vs PM |
| 15033411      | ---                                                                                        |                                                  |              | <0,01   | -9.18649    | AM down vs PM |
| 15060455      | ---                                                                                        |                                                  |              | <0,01   | -9.19773    | AM down vs PM |
| 15136936      | ---                                                                                        |                                                  |              | <0,01   | -9.25399    | AM down vs PM |
| 14934920      | ---                                                                                        |                                                  |              | <0,01   | -9.27641    | AM down vs PM |
| 14938232      | ---                                                                                        |                                                  |              | <0,01   | -9.31958    | AM down vs PM |
| 15126812      | ---                                                                                        |                                                  |              | <0,01   | -9.3368     | AM down vs PM |
| 15082470      | ---                                                                                        |                                                  |              | <0,01   | -9.33748    | AM down vs PM |
| 14989338      | ---                                                                                        |                                                  |              | <0,01   | -9.33968    | AM down vs PM |
| 15106374      | ---                                                                                        |                                                  |              | <0,01   | -9.42303    | AM down vs PM |
| 15001110      | ---                                                                                        |                                                  |              | <0,01   | -9.44207    | AM down vs PM |
| 14942828      | ---                                                                                        |                                                  |              | <0,01   | -9.44707    | AM down vs PM |
| 15006694      | ---                                                                                        |                                                  |              | <0,01   | -9.4937     | AM down vs PM |
| 15080985      | ---                                                                                        |                                                  |              | <0,01   | -9.52693    | AM down vs PM |
| 15071325      | ---                                                                                        |                                                  |              | <0,01   | -9.52777    | AM down vs PM |
| 15103641      | NR_032873 // MIR7-2 // microRNA mir-7-2 // --- // 100315008                                | microRNA mir-7-2                                 | MIR7-2       | <0,01   | -9.67189    | AM down vs PM |
| 15100530      | ---                                                                                        |                                                  |              | <0,01   | -9.69646    | AM down vs PM |
| 15123607      | ---                                                                                        |                                                  |              | <0,01   | -9.69954    | AM down vs PM |
| 15018734      | ---                                                                                        |                                                  |              | <0,01   | -9.70939    | AM down vs PM |
| 15120364      | ENSECAT00000018691 // TCF7L2 // transcription factor 7-like 2 (T-cell specific, HMG-box    | transcription factor 7-like 2                    | TCF7L2       | <0,01   | -9.74285    | AM down vs PM |
| 14928021      | ---                                                                                        |                                                  |              | <0,01   | -9.77627    | AM down vs PM |
| 15034555      | ---                                                                                        |                                                  |              | <0,01   | -9.82738    | AM down vs PM |
| 15082266      | ---                                                                                        |                                                  |              | <0,01   | -9.83919    | AM down vs PM |
| 15009515      | ---                                                                                        |                                                  |              | <0,01   | -9.85658    | AM down vs PM |
| 15116897      | ---                                                                                        |                                                  |              | <0,01   | -9.85674    | AM down vs PM |
| 14972822      | ---                                                                                        |                                                  |              | <0,01   | -9.86893    | AM down vs PM |
| 15136724      | ---                                                                                        |                                                  |              | <0,01   | -9.87303    | AM down vs PM |
| 15137306      | ---                                                                                        |                                                  |              | <0,01   | -9.89187    | AM down vs PM |
| 15123696      | ---                                                                                        |                                                  |              | <0,01   | -9.94105    | AM down vs PM |
| 15056884      | ---                                                                                        |                                                  |              | <0,01   | -9.94743    | AM down vs PM |
| 15076475      | ---                                                                                        |                                                  |              | <0,01   | -9.96444    | AM down vs PM |
| 15131878      | ---                                                                                        |                                                  |              | <0,01   | -9.97001    | AM down vs PM |
| 14929483      | ---                                                                                        |                                                  |              | <0,01   | -9.97779    | AM down vs PM |
| 14990746      | ---                                                                                        |                                                  |              | <0,01   | -9.98512    | AM down vs PM |
| 15035443      | ---                                                                                        |                                                  |              | <0,01   | -10.0111    | AM down vs PM |
| 15091422      | ---                                                                                        |                                                  |              | <0,01   | -10.0137    | AM down vs PM |

|          |                                                                                         |                                         |              |  |       |                        |
|----------|-----------------------------------------------------------------------------------------|-----------------------------------------|--------------|--|-------|------------------------|
| 15136932 | ---                                                                                     |                                         |              |  | <0,01 | -10.0562 AM down vs PM |
| 15021574 | ---                                                                                     |                                         |              |  | <0,01 | -10.125 AM down vs PM  |
| 15119937 | ---                                                                                     |                                         |              |  | <0,01 | -10.1436 AM down vs PM |
| 15131829 | ---                                                                                     |                                         |              |  | <0,01 | -10.1701 AM down vs PM |
| 15136330 | ---                                                                                     |                                         |              |  | <0,01 | -10.1879 AM down vs PM |
| 15136396 | ---                                                                                     |                                         |              |  | <0,01 | -10.1879 AM down vs PM |
| 14925107 | ---                                                                                     |                                         |              |  | <0,01 | -10.2665 AM down vs PM |
| 15133248 | ---                                                                                     |                                         |              |  | <0,01 | -10.2836 AM down vs PM |
| 15133576 | ---                                                                                     |                                         |              |  | <0,01 | -10.3176 AM down vs PM |
| 15094905 | NM_001257078 // CXCR7 // chemokine (C-X-C motif) receptor 7 // --- // 100057501 /// ENS | chemokine (C-X-C motif) receptor 7      | CXCR7        |  | <0,01 | -10.324 AM down vs PM  |
| 14986670 | ---                                                                                     |                                         |              |  | <0,01 | -10.3378 AM down vs PM |
| 15013214 | ---                                                                                     |                                         |              |  | <0,01 | -10.3447 AM down vs PM |
| 14938015 | ---                                                                                     |                                         |              |  | <0,01 | -10.365 AM down vs PM  |
| 15016292 | ---                                                                                     |                                         |              |  | <0,01 | -10.3722 AM down vs PM |
| 14969935 | ---                                                                                     |                                         |              |  | <0,01 | -10.43 AM down vs PM   |
| 15136988 | ---                                                                                     |                                         |              |  | <0,01 | -10.4448 AM down vs PM |
| 14927731 | ---                                                                                     |                                         |              |  | <0,01 | -10.4651 AM down vs PM |
| 14942998 | ---                                                                                     |                                         |              |  | <0,01 | -10.4891 AM down vs PM |
| 15045391 | ---                                                                                     |                                         |              |  | <0,01 | -10.5134 AM down vs PM |
| 14937067 | ---                                                                                     |                                         |              |  | <0,01 | -10.5778 AM down vs PM |
| 15137284 | ---                                                                                     |                                         |              |  | <0,01 | -10.614 AM down vs PM  |
| 15006532 | ---                                                                                     |                                         |              |  | <0,01 | -10.9163 AM down vs PM |
| 15071344 | ---                                                                                     |                                         |              |  | <0,01 | -10.9631 AM down vs PM |
| 15020143 | ---                                                                                     |                                         |              |  | <0,01 | -10.9861 AM down vs PM |
| 15003586 | ---                                                                                     |                                         |              |  | <0,01 | -11.0115 AM down vs PM |
| 15030212 | XM_001505026 // LOC100052624 // histone H2A type 1-like // --- // 100052624 /// ENSECAT | histone H2A type 1-like                 | LOC100052624 |  | <0,01 | -11.0312 AM down vs PM |
| 15029956 | ---                                                                                     |                                         |              |  | <0,01 | -11.0774 AM down vs PM |
| 14934714 | ---                                                                                     |                                         |              |  | <0,01 | -11.1017 AM down vs PM |
| 15011590 | ---                                                                                     |                                         |              |  | <0,01 | -11.1183 AM down vs PM |
| 15136368 | ---                                                                                     |                                         |              |  | <0,01 | -11.1494 AM down vs PM |
| 14981433 | ---                                                                                     |                                         |              |  | <0,01 | -11.2217 AM down vs PM |
| 15057108 | ---                                                                                     |                                         |              |  | <0,01 | -11.2319 AM down vs PM |
| 14982053 | ---                                                                                     |                                         |              |  | <0,01 | -11.2916 AM down vs PM |
| 15015661 | ---                                                                                     |                                         |              |  | <0,01 | -11.3752 AM down vs PM |
| 15030285 | XM_003363755 // LOC100629501 // olfactory receptor 2W1-like // --- // 100629501 /// ENS | olfactory receptor 2W1-like             | LOC100629501 |  | <0,01 | -11.4432 AM down vs PM |
| 15076479 | XM_001489227 // SEMA3C // sema domain, immunoglobulin domain (Ig), short basic domain,  | sema domain, immunoglobulin domain (Ig) | SEMA3C       |  | <0,01 | -11.5196 AM down vs PM |
| 15128302 | ---                                                                                     |                                         |              |  | <0,01 | -11.5748 AM down vs PM |
| 14986175 | ---                                                                                     |                                         |              |  | <0,01 | -11.63 AM down vs PM   |
| 15120682 | ---                                                                                     |                                         |              |  | <0,01 | -11.7021 AM down vs PM |
| 14934934 | ---                                                                                     |                                         |              |  | <0,01 | -11.7342 AM down vs PM |
| 14945248 | ---                                                                                     |                                         |              |  | <0,01 | -11.7834 AM down vs PM |
| 15120725 | ---                                                                                     |                                         |              |  | <0,01 | -11.8124 AM down vs PM |
| 15077680 | ---                                                                                     |                                         |              |  | <0,01 | -11.8639 AM down vs PM |
| 15106867 | ---                                                                                     |                                         |              |  | <0,01 | -11.883 AM down vs PM  |
| 15136798 | ---                                                                                     |                                         |              |  | <0,01 | -11.923 AM down vs PM  |
| 15129744 | ---                                                                                     |                                         |              |  | <0,01 | -11.9658 AM down vs PM |
| 15081996 | ---                                                                                     |                                         |              |  | <0,01 | -12.0043 AM down vs PM |
| 14987283 | ---                                                                                     |                                         |              |  | <0,01 | -12.0545 AM down vs PM |
| 15136978 | ---                                                                                     |                                         |              |  | <0,01 | -12.1102 AM down vs PM |
| 14943919 | ---                                                                                     |                                         |              |  | <0,01 | -12.2044 AM down vs PM |
| 14962196 | ---                                                                                     |                                         |              |  | <0,01 | -12.3211 AM down vs PM |
| 15136494 | ---                                                                                     |                                         |              |  | <0,01 | -12.3273 AM down vs PM |
| 15081440 | ---                                                                                     |                                         |              |  | <0,01 | -12.3633 AM down vs PM |
| 15137740 | ---                                                                                     |                                         |              |  | <0,01 | -12.4339 AM down vs PM |
| 14979733 | ---                                                                                     |                                         |              |  | <0,01 | -12.5955 AM down vs PM |
| 15107853 | ---                                                                                     |                                         |              |  | <0,01 | -12.5985 AM down vs PM |
| 15070812 | ---                                                                                     |                                         |              |  | <0,01 | -12.634 AM down vs PM  |

|          |                                                                                         |       |                        |
|----------|-----------------------------------------------------------------------------------------|-------|------------------------|
| 15031964 | ---                                                                                     | <0,01 | -12.6654 AM down vs PM |
| 15029693 | ---                                                                                     | <0,01 | -12.67 AM down vs PM   |
| 15136558 | ---                                                                                     | <0,01 | -12.67 AM down vs PM   |
| 15101493 | ---                                                                                     | <0,01 | -12.7499 AM down vs PM |
| 15136774 | ---                                                                                     | <0,01 | -12.7733 AM down vs PM |
| 15137338 | ---                                                                                     | <0,01 | -12.7785 AM down vs PM |
| 14928003 | ---                                                                                     | <0,01 | -12.8005 AM down vs PM |
| 14934917 | ---                                                                                     | <0,01 | -12.8454 AM down vs PM |
| 15006335 | ---                                                                                     | <0,01 | -12.8522 AM down vs PM |
| 15136364 | ---                                                                                     | <0,01 | -12.8522 AM down vs PM |
| 15063181 | ---                                                                                     | <0,01 | -12.865 AM down vs PM  |
| 15053644 | XR_036256 // LOC100068798 // calponin-3-like // --- // 100068798 /// XM_001490827 // LO | <0,01 | -12.8677 AM down vs PM |
| 15006938 | ---                                                                                     | <0,01 | -12.8778 AM down vs PM |
| 15033037 | ---                                                                                     | <0,01 | -12.9188 AM down vs PM |
| 14949316 | ---                                                                                     | <0,01 | -12.9467 AM down vs PM |
| 15003625 | ---                                                                                     | <0,01 | -13.0727 AM down vs PM |
| 15045573 | ---                                                                                     | <0,01 | -13.1091 AM down vs PM |
| 15057372 | ---                                                                                     | <0,01 | -13.1106 AM down vs PM |
| 15129919 | ---                                                                                     | <0,01 | -13.1292 AM down vs PM |
| 15060545 | ---                                                                                     | <0,01 | -13.2365 AM down vs PM |
| 14937073 | ---                                                                                     | <0,01 | -13.2641 AM down vs PM |
| 15019934 | ---                                                                                     | <0,01 | -13.3434 AM down vs PM |
| 15008985 | ---                                                                                     | <0,01 | -13.4618 AM down vs PM |
| 15128327 | ---                                                                                     | <0,01 | -13.4813 AM down vs PM |
| 15030305 | ---                                                                                     | <0,01 | -13.5114 AM down vs PM |
| 15128934 | ---                                                                                     | <0,01 | -13.5188 AM down vs PM |
| 14929431 | ---                                                                                     | <0,01 | -13.5294 AM down vs PM |
| 15001469 | ---                                                                                     | <0,01 | -13.6178 AM down vs PM |
| 14948030 | ---                                                                                     | <0,01 | -13.6582 AM down vs PM |
| 15137280 | ---                                                                                     | <0,01 | -13.6852 AM down vs PM |
| 15054737 | ---                                                                                     | <0,01 | -13.7121 AM down vs PM |
| 15044653 | ---                                                                                     | <0,01 | -13.7904 AM down vs PM |
| 15079137 | ---                                                                                     | <0,01 | -13.915 AM down vs PM  |
| 15005672 | ---                                                                                     | <0,01 | -13.9337 AM down vs PM |
| 15060218 | NM_001081780 // LUM // lumican // --- // 100009681 /// ENSECAT00000019349 // LUM // lum | <0,01 | -13.935 AM down vs PM  |
| 15110227 | ---                                                                                     | <0,01 | -14.0682 AM down vs PM |
| 15121666 | ---                                                                                     | <0,01 | -14.2476 AM down vs PM |
| 15137750 | ---                                                                                     | <0,01 | -14.4959 AM down vs PM |
| 14939195 | ---                                                                                     | <0,01 | -14.5698 AM down vs PM |
| 14945347 | ---                                                                                     | <0,01 | -14.7454 AM down vs PM |
| 15121695 | ---                                                                                     | <0,01 | -14.8225 AM down vs PM |
| 15128857 | ---                                                                                     | <0,01 | -14.966 AM down vs PM  |
| 15136466 | ---                                                                                     | <0,01 | -14.9687 AM down vs PM |
| 15132461 | ---                                                                                     | <0,01 | -15.1515 AM down vs PM |
| 15077411 | ---                                                                                     | <0,01 | -15.1611 AM down vs PM |
| 15062898 | ---                                                                                     | <0,01 | -15.2624 AM down vs PM |
| 15137382 | ---                                                                                     | <0,01 | -15.2918 AM down vs PM |
| 15137596 | ---                                                                                     | <0,01 | -15.2918 AM down vs PM |
| 15128427 | ---                                                                                     | <0,01 | -15.3044 AM down vs PM |
| 15062932 | ---                                                                                     | <0,01 | -15.4685 AM down vs PM |
| 15006034 | ---                                                                                     | <0,01 | -15.6644 AM down vs PM |
| 15054877 | ---                                                                                     | <0,01 | -15.7366 AM down vs PM |
| 14953056 | ---                                                                                     | <0,01 | -15.7403 AM down vs PM |
| 15029587 | ---                                                                                     | <0,01 | -15.771 AM down vs PM  |
| 14956069 | ---                                                                                     | <0,01 | -15.8166 AM down vs PM |
| 14998899 | ---                                                                                     | <0,01 | -15.8931 AM down vs PM |
| 15133022 | ---                                                                                     | <0,01 | -15.9749 AM down vs PM |

|          |                                                                                         |                                 |              |       |                        |
|----------|-----------------------------------------------------------------------------------------|---------------------------------|--------------|-------|------------------------|
| 15068686 | ---                                                                                     |                                 |              | <0,01 | -16.0166 AM down vs PM |
| 15003583 | ---                                                                                     |                                 |              | <0,01 | -16.0171 AM down vs PM |
| 15132692 | ---                                                                                     |                                 |              | <0,01 | -16.0431 AM down vs PM |
| 14957420 | ---                                                                                     |                                 |              | <0,01 | -16.0549 AM down vs PM |
| 15088030 | ---                                                                                     |                                 |              | <0,01 | -16.318 AM down vs PM  |
| 14981953 | ENSECAT00000019198 // ADAM19 // ADAM metallopeptidase domain 19 // --- // ---           | ADAM metallopeptidase domain 19 | ADAM19       | <0,01 | -16.3272 AM down vs PM |
| 15078648 | ---                                                                                     |                                 |              | <0,01 | -16.6413 AM down vs PM |
| 15021779 | ---                                                                                     |                                 |              | <0,01 | -16.771 AM down vs PM  |
| 15132014 | ---                                                                                     |                                 |              | <0,01 | -16.9077 AM down vs PM |
| 14987063 | ---                                                                                     |                                 |              | <0,01 | -17.0099 AM down vs PM |
| 15132754 | ---                                                                                     |                                 |              | <0,01 | -17.0311 AM down vs PM |
| 15136740 | ---                                                                                     |                                 |              | <0,01 | -17.0521 AM down vs PM |
| 15133394 | ---                                                                                     |                                 |              | <0,01 | -17.0556 AM down vs PM |
| 14972192 | ---                                                                                     |                                 |              | <0,01 | -17.1074 AM down vs PM |
| 15131131 | ---                                                                                     |                                 |              | <0,01 | -17.1132 AM down vs PM |
| 15137618 | ---                                                                                     |                                 |              | <0,01 | -17.16 AM down vs PM   |
| 14957006 | ---                                                                                     |                                 |              | <0,01 | -17.1707 AM down vs PM |
| 15063592 | ---                                                                                     |                                 |              | <0,01 | -17.1957 AM down vs PM |
| 15020762 | ---                                                                                     |                                 |              | <0,01 | -17.2581 AM down vs PM |
| 14970532 | ---                                                                                     |                                 |              | <0,01 | -17.2951 AM down vs PM |
| 15136360 | ---                                                                                     |                                 |              | <0,01 | -17.3386 AM down vs PM |
| 15137394 | ---                                                                                     |                                 |              | <0,01 | -17.4174 AM down vs PM |
| 15136446 | ---                                                                                     |                                 |              | <0,01 | -17.4933 AM down vs PM |
| 15136374 | ---                                                                                     |                                 |              | <0,01 | -17.5034 AM down vs PM |
| 15136754 | ---                                                                                     |                                 |              | <0,01 | -17.5074 AM down vs PM |
| 15127535 | ---                                                                                     |                                 |              | <0,01 | -17.5681 AM down vs PM |
| 15082473 | ---                                                                                     |                                 |              | <0,01 | -17.6968 AM down vs PM |
| 15128311 | ---                                                                                     |                                 |              | <0,01 | -17.7146 AM down vs PM |
| 15117833 | ---                                                                                     |                                 |              | <0,01 | -17.727 AM down vs PM  |
| 15018759 | ---                                                                                     |                                 |              | <0,01 | -17.8395 AM down vs PM |
| 14956620 | ---                                                                                     |                                 |              | <0,01 | -17.8451 AM down vs PM |
| 14972820 | XM_001497247 // LOC100067132 // olfactory receptor 476-like // --- // 100067132 /// ENS | olfactory receptor 476-like     | LOC100067132 | <0,01 | -17.8474 AM down vs PM |
| 15032277 | ---                                                                                     |                                 |              | <0,01 | -17.8782 AM down vs PM |
| 14925807 | ---                                                                                     |                                 |              | <0,01 | -17.9532 AM down vs PM |
| 14925837 | ---                                                                                     |                                 |              | <0,01 | -17.9532 AM down vs PM |
| 14925879 | ---                                                                                     |                                 |              | <0,01 | -17.9532 AM down vs PM |
| 14925951 | ---                                                                                     |                                 |              | <0,01 | -17.9532 AM down vs PM |
| 14978864 | ---                                                                                     |                                 |              | <0,01 | -18.0059 AM down vs PM |
| 15137146 | ---                                                                                     |                                 |              | <0,01 | -18.007 AM down vs PM  |
| 15082809 | ---                                                                                     |                                 |              | <0,01 | -18.1827 AM down vs PM |
| 15132482 | ---                                                                                     |                                 |              | <0,01 | -18.2294 AM down vs PM |
| 15020350 | ---                                                                                     |                                 |              | <0,01 | -18.2685 AM down vs PM |
| 15117290 | ---                                                                                     |                                 |              | <0,01 | -18.4039 AM down vs PM |
| 15136286 | ---                                                                                     |                                 |              | <0,01 | -18.4182 AM down vs PM |
| 15129022 | ---                                                                                     |                                 |              | <0,01 | -18.5343 AM down vs PM |
| 14947605 | ---                                                                                     |                                 |              | <0,01 | -18.5416 AM down vs PM |
| 15136472 | ---                                                                                     |                                 |              | <0,01 | -18.5454 AM down vs PM |
| 14995193 | ---                                                                                     |                                 |              | <0,01 | -18.5635 AM down vs PM |
| 15078277 | ---                                                                                     |                                 |              | <0,01 | -18.5838 AM down vs PM |
| 15029101 | ---                                                                                     |                                 |              | <0,01 | -18.6205 AM down vs PM |
| 14936458 | ---                                                                                     |                                 |              | <0,01 | -18.6637 AM down vs PM |
| 15045035 | ---                                                                                     |                                 |              | <0,01 | -18.677 AM down vs PM  |
| 15124574 | ---                                                                                     |                                 |              | <0,01 | -18.7169 AM down vs PM |
| 14986730 | ---                                                                                     |                                 |              | <0,01 | -18.8457 AM down vs PM |
| 15042777 | ---                                                                                     |                                 |              | <0,01 | -18.9303 AM down vs PM |
| 15130707 | ---                                                                                     |                                 |              | <0,01 | -19.2377 AM down vs PM |
| 15136302 | ---                                                                                     |                                 |              | <0,01 | -19.2564 AM down vs PM |

|                                                                                     |                                   |       |       |                        |
|-------------------------------------------------------------------------------------|-----------------------------------|-------|-------|------------------------|
| 15067799 ---                                                                        |                                   |       | <0,01 | -19.4071 AM down vs PM |
| 15136210 ---                                                                        |                                   |       | <0,01 | -19.4734 AM down vs PM |
| 15051455 ---                                                                        |                                   |       | <0,01 | -19.4757 AM down vs PM |
| 14943132 ---                                                                        |                                   |       | <0,01 | -19.567 AM down vs PM  |
| 15053642 ---                                                                        |                                   |       | <0,01 | -19.9222 AM down vs PM |
| 15130705 ---                                                                        |                                   |       | <0,01 | -19.9706 AM down vs PM |
| 14992455 ---                                                                        |                                   |       | <0,01 | -19.9856 AM down vs PM |
| 15136206 ---                                                                        |                                   |       | <0,01 | -19.9856 AM down vs PM |
| 15088797 ---                                                                        |                                   |       | <0,01 | -20.068 AM down vs PM  |
| 15137694 ---                                                                        |                                   |       | <0,01 | -20.078 AM down vs PM  |
| 14945595 ---                                                                        |                                   |       | <0,01 | -20.1176 AM down vs PM |
| 15081326 ---                                                                        |                                   |       | <0,01 | -20.253 AM down vs PM  |
| 15070665 ---                                                                        |                                   |       | <0,01 | -20.3069 AM down vs PM |
| 15077744 ---                                                                        |                                   |       | <0,01 | -20.5505 AM down vs PM |
| 14981259 ---                                                                        |                                   |       | <0,01 | -20.5628 AM down vs PM |
| 15136398 ---                                                                        |                                   |       | <0,01 | -20.5731 AM down vs PM |
| 15137488 ---                                                                        |                                   |       | <0,01 | -20.6121 AM down vs PM |
| 15136990 ---                                                                        |                                   |       | <0,01 | -20.6359 AM down vs PM |
| 15137038 ---                                                                        |                                   |       | <0,01 | -20.7475 AM down vs PM |
| 15013715 ---                                                                        |                                   |       | <0,01 | -20.9782 AM down vs PM |
| 15095850 ---                                                                        |                                   |       | <0,01 | -21.0675 AM down vs PM |
| 15130280 ---                                                                        |                                   |       | <0,01 | -21.4392 AM down vs PM |
| 15137376 ---                                                                        |                                   |       | <0,01 | -21.4701 AM down vs PM |
| 15009301 ---                                                                        |                                   |       | <0,01 | -21.5584 AM down vs PM |
| 15132186 ---                                                                        |                                   |       | <0,01 | -21.6506 AM down vs PM |
| 15081319 ---                                                                        |                                   |       | <0,01 | -21.6663 AM down vs PM |
| 15073950 ---                                                                        |                                   |       | <0,01 | -21.7265 AM down vs PM |
| 15006991 ---                                                                        |                                   |       | <0,01 | -21.8189 AM down vs PM |
| 15081224 ---                                                                        |                                   |       | <0,01 | -21.873 AM down vs PM  |
| 14994624 ---                                                                        |                                   |       | <0,01 | -21.8924 AM down vs PM |
| 15136260 ---                                                                        |                                   |       | <0,01 | -22.0647 AM down vs PM |
| 15136808 ---                                                                        |                                   |       | <0,01 | -22.0968 AM down vs PM |
| 14997932 ---                                                                        |                                   |       | <0,01 | -22.1161 AM down vs PM |
| 14951445 ---                                                                        |                                   |       | <0,01 | -22.1351 AM down vs PM |
| 14956174 ---                                                                        |                                   |       | <0,01 | -22.2277 AM down vs PM |
| 15121381 ---                                                                        |                                   |       | <0,01 | -22.2542 AM down vs PM |
| 15131450 ---                                                                        |                                   |       | <0,01 | -22.2625 AM down vs PM |
| 15137370 ---                                                                        |                                   |       | <0,01 | -22.3584 AM down vs PM |
| 15104019 ---                                                                        |                                   |       | <0,01 | -22.4938 AM down vs PM |
| 15133141 ---                                                                        |                                   |       | <0,01 | -22.5699 AM down vs PM |
| 15137422 ---                                                                        |                                   |       | <0,01 | -22.5763 AM down vs PM |
| 15067039 ---                                                                        |                                   |       | <0,01 | -22.5821 AM down vs PM |
| 14952507 ---                                                                        |                                   |       | <0,01 | -22.6912 AM down vs PM |
| 15047659 ---                                                                        |                                   |       | <0,01 | -22.7562 AM down vs PM |
| 15104015 ---                                                                        |                                   |       | <0,01 | -22.7969 AM down vs PM |
| 15136580 ---                                                                        |                                   |       | <0,01 | -23.1692 AM down vs PM |
| 15013552 ---                                                                        |                                   |       | <0,01 | -23.2454 AM down vs PM |
| 14978556 ---                                                                        |                                   |       | <0,01 | -23.3349 AM down vs PM |
| 15136930 ---                                                                        |                                   |       | <0,01 | -23.3383 AM down vs PM |
| 15091433 ---                                                                        |                                   |       | <0,01 | -23.5413 AM down vs PM |
| 14975354 AF508034 // PAI-1 // plasminogen activator inhibitor-1 // --- // 100033931 | plasminogen activator inhibitor-1 | PAI-1 | <0,01 | -23.8273 AM down vs PM |
| 15128853 ---                                                                        |                                   |       | <0,01 | -24.1031 AM down vs PM |
| 15052447 ---                                                                        |                                   |       | <0,01 | -24.1896 AM down vs PM |
| 15035006 ---                                                                        |                                   |       | <0,01 | -24.1938 AM down vs PM |
| 15002933 ---                                                                        |                                   |       | <0,01 | -24.2487 AM down vs PM |
| 15003532 ---                                                                        |                                   |       | <0,01 | -24.3102 AM down vs PM |
| 15025136 ---                                                                        |                                   |       | <0,01 | -24.7365 AM down vs PM |

|          |                                                                                         |                                                  |              |       |                        |
|----------|-----------------------------------------------------------------------------------------|--------------------------------------------------|--------------|-------|------------------------|
| 15137522 | ---                                                                                     |                                                  |              | <0,01 | -24.8593 AM down vs PM |
| 15066331 | ---                                                                                     |                                                  |              | <0,01 | -25.1991 AM down vs PM |
| 14927037 | ---                                                                                     |                                                  |              | <0,01 | -25.2551 AM down vs PM |
| 15000483 | ---                                                                                     |                                                  |              | <0,01 | -25.2714 AM down vs PM |
| 15011434 | ENSECAT0000004554 // PTX3 // pentraxin 3, long --- // ---                               | pentraxin 3                                      | PTX3         | <0,01 | -25.3722 AM down vs PM |
| 15067000 | ---                                                                                     |                                                  |              | <0,01 | -25.8976 AM down vs PM |
| 15097038 | ---                                                                                     |                                                  |              | <0,01 | -25.9746 AM down vs PM |
| 15137450 | ---                                                                                     |                                                  |              | <0,01 | -26.0121 AM down vs PM |
| 15075331 | ---                                                                                     |                                                  |              | <0,01 | -26.0917 AM down vs PM |
| 15024544 | ---                                                                                     |                                                  |              | <0,01 | -26.1531 AM down vs PM |
| 14943439 | ---                                                                                     |                                                  |              | <0,01 | -26.813 AM down vs PM  |
| 15136662 | ---                                                                                     |                                                  |              | <0,01 | -26.9099 AM down vs PM |
| 15003542 | ---                                                                                     |                                                  |              | <0,01 | -26.9591 AM down vs PM |
| 15137700 | ---                                                                                     |                                                  |              | <0,01 | -26.9642 AM down vs PM |
| 15047220 | ---                                                                                     |                                                  |              | <0,01 | -27.28 AM down vs PM   |
| 15136458 | ---                                                                                     |                                                  |              | <0,01 | -27.4124 AM down vs PM |
| 15115746 | ---                                                                                     |                                                  |              | <0,01 | -27.4148 AM down vs PM |
| 15022133 | ---                                                                                     |                                                  |              | <0,01 | -27.6343 AM down vs PM |
| 15019959 | ---                                                                                     |                                                  |              | <0,01 | -27.7861 AM down vs PM |
| 15136532 | ---                                                                                     |                                                  |              | <0,01 | -27.9585 AM down vs PM |
| 15001446 | ---                                                                                     |                                                  |              | <0,01 | -28.1817 AM down vs PM |
| 15136292 | ---                                                                                     |                                                  |              | <0,01 | -28.1817 AM down vs PM |
| 15136620 | ---                                                                                     |                                                  |              | <0,01 | -28.2968 AM down vs PM |
| 15136790 | ---                                                                                     |                                                  |              | <0,01 | -28.3046 AM down vs PM |
| 15131847 | ---                                                                                     |                                                  |              | <0,01 | -28.5569 AM down vs PM |
| 14949750 | ---                                                                                     |                                                  |              | <0,01 | -28.8852 AM down vs PM |
| 15085237 | ---                                                                                     |                                                  |              | <0,01 | -28.9337 AM down vs PM |
| 15137490 | ---                                                                                     |                                                  |              | <0,01 | -29.0469 AM down vs PM |
| 15136244 | ---                                                                                     |                                                  |              | <0,01 | -29.1084 AM down vs PM |
| 14935042 | ---                                                                                     |                                                  |              | <0,01 | -29.2099 AM down vs PM |
| 15136584 | ---                                                                                     |                                                  |              | <0,01 | -29.3036 AM down vs PM |
| 14939913 | XM_003363631 // LOC100629686 // ig kappa chain V-III region PC 2485/PC 4039-like // --- | ig kappa chain V-III region PC 2485/PC 4039-like | LOC100629686 | <0,01 | -29.312 AM down vs PM  |
| 15025367 | ---                                                                                     |                                                  |              | <0,01 | -29.3716 AM down vs PM |
| 15026893 | ---                                                                                     |                                                  |              | <0,01 | -29.4833 AM down vs PM |
| 15081328 | ---                                                                                     |                                                  |              | <0,01 | -29.8041 AM down vs PM |
| 15060263 | ---                                                                                     |                                                  |              | <0,01 | -29.8346 AM down vs PM |
| 15137214 | ---                                                                                     |                                                  |              | <0,01 | -29.9268 AM down vs PM |
| 15096136 | ---                                                                                     |                                                  |              | <0,01 | -29.931 AM down vs PM  |
| 15004469 | ---                                                                                     |                                                  |              | <0,01 | -29.9682 AM down vs PM |
| 14938460 | ---                                                                                     |                                                  |              | <0,01 | -29.9793 AM down vs PM |
| 15013653 | ---                                                                                     |                                                  |              | <0,01 | -30.0631 AM down vs PM |
| 15137684 | ---                                                                                     |                                                  |              | <0,01 | -30.1908 AM down vs PM |
| 14970624 | ---                                                                                     |                                                  |              | <0,01 | -30.2479 AM down vs PM |
| 14943758 | ---                                                                                     |                                                  |              | <0,01 | -30.3293 AM down vs PM |
| 15077222 | ---                                                                                     |                                                  |              | <0,01 | -30.5649 AM down vs PM |
| 15136770 | ---                                                                                     |                                                  |              | <0,01 | -30.8029 AM down vs PM |
| 15067793 | ---                                                                                     |                                                  |              | <0,01 | -31.2409 AM down vs PM |
| 14949314 | ---                                                                                     |                                                  |              | <0,01 | -31.3397 AM down vs PM |
| 15136442 | ---                                                                                     |                                                  |              | <0,01 | -31.7406 AM down vs PM |
| 14943621 | ---                                                                                     |                                                  |              | <0,01 | -32.1469 AM down vs PM |
| 15128313 | ---                                                                                     |                                                  |              | <0,01 | -32.2533 AM down vs PM |
| 14927251 | ---                                                                                     |                                                  |              | <0,01 | -32.2825 AM down vs PM |
| 15008001 | ---                                                                                     |                                                  |              | <0,01 | -32.2965 AM down vs PM |
| 14942831 | ---                                                                                     |                                                  |              | <0,01 | -32.4793 AM down vs PM |
| 15136884 | ---                                                                                     |                                                  |              | <0,01 | -32.5006 AM down vs PM |
| 14939826 | ---                                                                                     |                                                  |              | <0,01 | -32.5426 AM down vs PM |
| 15136786 | ---                                                                                     |                                                  |              | <0,01 | -32.7815 AM down vs PM |

|              |       |                        |
|--------------|-------|------------------------|
| 15136478 --- | <0,01 | -33.1294 AM down vs PM |
| 15137138 --- | <0,01 | -33.5849 AM down vs PM |
| 15026633 --- | <0,01 | -33.6268 AM down vs PM |
| 15033547 --- | <0,01 | -33.6459 AM down vs PM |
| 15115930 --- | <0,01 | -33.8559 AM down vs PM |
| 15047176 --- | <0,01 | -34.2521 AM down vs PM |
| 14986542 --- | <0,01 | -34.5596 AM down vs PM |
| 15123572 --- | <0,01 | -34.7115 AM down vs PM |
| 15031962 --- | <0,01 | -34.8324 AM down vs PM |
| 15013612 --- | <0,01 | -34.8776 AM down vs PM |
| 15128937 --- | <0,01 | -35.153 AM down vs PM  |
| 15137318 --- | <0,01 | -35.153 AM down vs PM  |
| 15110451 --- | <0,01 | -35.2867 AM down vs PM |
| 15080685 --- | <0,01 | -35.702 AM down vs PM  |
| 14952251 --- | <0,01 | -35.9024 AM down vs PM |
| 15137586 --- | <0,01 | -35.9024 AM down vs PM |
| 15137582 --- | <0,01 | -36.0792 AM down vs PM |
| 14996189 --- | <0,01 | -36.1282 AM down vs PM |
| 15137460 --- | <0,01 | -36.4128 AM down vs PM |
| 15132102 --- | <0,01 | -36.6078 AM down vs PM |
| 15136926 --- | <0,01 | -37.4779 AM down vs PM |
| 15128840 --- | <0,01 | -37.5234 AM down vs PM |
| 15136666 --- | <0,01 | -37.6173 AM down vs PM |
| 14935334 --- | <0,01 | -37.6561 AM down vs PM |
| 15136698 --- | <0,01 | -37.8108 AM down vs PM |
| 15137182 --- | <0,01 | -37.991 AM down vs PM  |
| 15097439 --- | <0,01 | -38.1454 AM down vs PM |
| 15128145 --- | <0,01 | -38.3314 AM down vs PM |
| 14969512 --- | <0,01 | -38.3468 AM down vs PM |
| 15136230 --- | <0,01 | -38.4083 AM down vs PM |
| 14937086 --- | <0,01 | -38.7106 AM down vs PM |
| 15021111 --- | <0,01 | -38.751 AM down vs PM  |
| 15053588 --- | <0,01 | -38.7772 AM down vs PM |
| 15007548 --- | <0,01 | -38.8115 AM down vs PM |
| 14944218 --- | <0,01 | -39.0484 AM down vs PM |
| 14936804 --- | <0,01 | -39.2676 AM down vs PM |
| 15136530 --- | <0,01 | -40.011 AM down vs PM  |
| 15002538 --- | <0,01 | -40.1598 AM down vs PM |
| 15026631 --- | <0,01 | -40.6787 AM down vs PM |
| 14978691 --- | <0,01 | -40.6799 AM down vs PM |
| 15136238 --- | <0,01 | -41.0053 AM down vs PM |
| 14995011 --- | <0,01 | -41.0053 AM down vs PM |
| 15137326 --- | <0,01 | -42.4186 AM down vs PM |
| 15126570 --- | <0,01 | -42.6344 AM down vs PM |
| 15137436 --- | <0,01 | -43.1264 AM down vs PM |
| 15137530 --- | <0,01 | -43.429 AM down vs PM  |
| 15129820 --- | <0,01 | -43.4952 AM down vs PM |
| 15136308 --- | <0,01 | -44.3743 AM down vs PM |
| 15081696 --- | <0,01 | -44.4924 AM down vs PM |
| 15137562 --- | <0,01 | -45.255 AM down vs PM  |
| 15128737 --- | <0,01 | -45.3077 AM down vs PM |
| 15137556 --- | <0,01 | -45.6471 AM down vs PM |
| 14948800 --- | <0,01 | -46.3879 AM down vs PM |
| 15136922 --- | <0,01 | -47.074 AM down vs PM  |
| 15137244 --- | <0,01 | -47.511 AM down vs PM  |
| 14997839 --- | <0,01 | -47.6731 AM down vs PM |
| 14996894 --- | <0,01 | -48.2224 AM down vs PM |

|              |       |                        |
|--------------|-------|------------------------|
| 15123626 --- | <0,01 | -48.8002 AM down vs PM |
| 15136502 --- | <0,01 | -49.0912 AM down vs PM |
| 15042340 --- | <0,01 | -49.9077 AM down vs PM |
| 15128949 --- | <0,01 | -50.085 AM down vs PM  |
| 15132227 --- | <0,01 | -50.2184 AM down vs PM |
| 15137396 --- | <0,01 | -50.2184 AM down vs PM |
| 15088688 --- | <0,01 | -50.5678 AM down vs PM |
| 14943127 --- | <0,01 | -51.5054 AM down vs PM |
| 15004330 --- | <0,01 | -51.7294 AM down vs PM |
| 15122064 --- | <0,01 | -51.8703 AM down vs PM |
| 15137288 --- | <0,01 | -52.1903 AM down vs PM |
| 15137524 --- | <0,01 | -52.5658 AM down vs PM |
| 15137386 --- | <0,01 | -53.6274 AM down vs PM |
| 15025326 --- | <0,01 | -56.308 AM down vs PM  |
| 15042941 --- | <0,01 | -56.308 AM down vs PM  |
| 14992314 --- | <0,01 | -57.2961 AM down vs PM |
| 15056875 --- | <0,01 | -57.3263 AM down vs PM |
| 15128806 --- | <0,01 | -57.683 AM down vs PM  |
| 15137304 --- | <0,01 | -57.683 AM down vs PM  |
| 15137420 --- | <0,01 | -57.893 AM down vs PM  |
| 15065033 --- | <0,01 | -58.9359 AM down vs PM |
| 15137316 --- | <0,01 | -59.0041 AM down vs PM |
| 15054769 --- | <0,01 | -59.3197 AM down vs PM |
| 15040330 --- | <0,01 | -59.991 AM down vs PM  |
| 15136282 --- | <0,01 | -60.5216 AM down vs PM |
| 14992104 --- | <0,01 | -60.7582 AM down vs PM |
| 14926511 --- | <0,01 | -61.6782 AM down vs PM |
| 15077655 --- | <0,01 | -62.1591 AM down vs PM |
| 15136898 --- | <0,01 | -62.1591 AM down vs PM |
| 15111236 --- | <0,01 | -62.2758 AM down vs PM |
| 15136202 --- | <0,01 | -62.3235 AM down vs PM |
| 15137282 --- | <0,01 | -62.6104 AM down vs PM |
| 14956238 --- | <0,01 | -62.9583 AM down vs PM |
| 15065994 --- | <0,01 | -64.2191 AM down vs PM |
| 15137094 --- | <0,01 | -67.7203 AM down vs PM |
| 14998362 --- | <0,01 | -68.0454 AM down vs PM |
| 15136264 --- | <0,01 | -68.0454 AM down vs PM |
| 15137612 --- | <0,01 | -68.869 AM down vs PM  |
| 15009517 --- | <0,01 | -70.1267 AM down vs PM |
| 15136414 --- | <0,01 | -70.1267 AM down vs PM |
| 14952023 --- | <0,01 | -70.8349 AM down vs PM |
| 15137574 --- | <0,01 | -70.8349 AM down vs PM |
| 15137466 --- | <0,01 | -72.524 AM down vs PM  |
| 15137516 --- | <0,01 | -77.4462 AM down vs PM |
| 15132417 --- | <0,01 | -82.3122 AM down vs PM |
| 15136682 --- | <0,01 | -89.1531 AM down vs PM |
| 14941506 --- | <0,01 | -89.2852 AM down vs PM |
| 15137340 --- | <0,01 | -91.5812 AM down vs PM |
| 15025365 --- | <0,01 | -93.9848 AM down vs PM |
| 15136288 --- | <0,01 | -98.4802 AM down vs PM |
| 14941804 --- | <0,01 | -130.059 AM down vs PM |
| 15136486 --- | <0,01 | -178.292 AM down vs PM |
| 15136730 --- | <0,01 | -184.898 AM down vs PM |
| 15136318 --- | <0,01 | -200.831 AM down vs PM |
| 15136676 --- | <0,01 | -242.107 AM down vs PM |
