# Supplementary material for: Comparative transcriptome analysis of equine alveolar macrophages
Source: PubMed Central journal article supplement (PMC5412682; doi:10.1111/evj.12584), 2016-07-09
Supplement: EVJ-49-375-s002.pdf [file EVJ-49-375-s002.pdf]

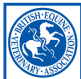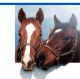

## Supplementary Item 1b: Using BIOLAYOUT : Top clusters of genes more highly expressed in AMs

| Transcript ID | Gene assignment                                                                          | Gene symbol | MCL_2.2     |
|---------------|------------------------------------------------------------------------------------------|-------------|-------------|
| 15030673      | XM_001490934 // ABHD16A // abhydrolase domain containing 16A // --- // 100058736 // EN   | ABHD16A     | Cluster0002 |
| 14994711      | XM_001503658 // ACP1 // acid phosphatase 1, soluble // --- // 100057408 // ENSECAT0000   | ACP1        | Cluster0002 |
| 15011734      | XM_001496284 // ACTL6A // actin-like 6A // --- // 100065792 // ENSECAT00000014242 // A   | ACTL6A      | Cluster0002 |
| 14988137      | XM_001491463 // ACTR1B // ARP1 actin-related protein 1 homolog B, centractin beta (yeas  | ACTR1B      | Cluster0002 |
| 15009338      | XM_001491549 // ACVR1 // activin A receptor, type I // --- // 100050899 // ENSECAT0000   | ACVR1       | Cluster0002 |
| 14947073      | ENSECAT00000015275 // ADAL // adenosine deaminase-like // --- // 100070813               | ADAL        | Cluster0002 |
| 15072643      | ENSECAT000000014034 // ADD1 // adducin 1 (alpha) // --- // 100051451                     | ADD1        | Cluster0002 |
| 15074824      | XM_001496039 // ADIPOR1 // adiponectin receptor 1 // --- // 100052436 // ENSECAT000000   | ADIPOR1     | Cluster0002 |
| 15099658      | NM_001163830 // ADIPOR2 // adiponectin receptor 2 // --- // 100050051 // ENSECAT000000   | ADIPOR2     | Cluster0002 |
| 15094456      | ENSECAT00000015868 // AGFG1 // ArfGAP with FG repeats 1 // --- // ---                    | AGFG1       | Cluster0002 |
| 14975160      | ENSECAT000000017199 // AGFG2 // ArfGAP with FG repeats 2 // --- // 100068998             | AGFG2       | Cluster0002 |
| 15077776      | XM_001496547 // AHR // aryl hydrocarbon receptor // --- // 100066186 // ENSECAT00000001  | AHR         | Cluster0002 |
| 14971483      | NM_001081937 // AIP // aryl hydrocarbon receptor interacting protein // --- // 10003414  | AIP         | Cluster0002 |
| 15018296      | XM_001917282 // ALDH4A1 // aldehyde dehydrogenase 4 family, member A1 // --- // 1001472  | ALDH4A1     | Cluster0002 |
| 15051570      | XM_001504059 // ALG2 // asparagine-linked glycosylation 2, alpha-1,3-mannosyltransferas  | ALG2        | Cluster0002 |
| 15014171      | XM_001497526 // ALG3 // asparagine-linked glycosylation 3, alpha-1,3- mannosyltransfera  | ALG3        | Cluster0002 |
| 15106791      | ENSECAT000000024510 // ALG8 // asparagine-linked glycosylation 8, alpha-1,3-glycosyltran | ALG8        | Cluster0002 |
| 15002728      | NM_001163965 // ALOX5AP // arachidonate 5-lipoxygenase-activating protein // --- // 100  | ALOX5AP     | Cluster0002 |
| 14972264      | ENSECAT000000025776 // AMBRA1 // autophagy/beclin-1 regulator 1 // --- // 100050652 //   | AMBRA1      | Cluster0002 |
| 14964870      | ENSECAT00000011973 // AMZ2 // archaeysin family metalloproteinase 2 // --- // 100062918  | AMZ2        | Cluster0002 |
| 14934969      | XM_001504023 // ANXA11 // annexin A11 // --- // 100064425 // ENSECAT000000021182 // ANX  | ANXA11      | Cluster0002 |
| 14937776      | NM_001123380 // ANXA2 // annexin A2 // --- // 100054320 // ENSECAT00000013926 // ANXA2   | ANXA2       | Cluster0002 |
| 15043873      | ENSECAT000000013423 // APTX // aprataxin // --- // 100068091 // XM_001917719 // APTX //  | APTX        | Cluster0002 |
| 14972376      | ENSECAT000000026736 // ARFGAP2 // ADP-ribosylation factor GTPase activating protein 2 // | ARFGAP2     | Cluster0002 |
| 14972287      | XM_001489971 // ARHGAP1 // Rho GTPase activating protein 1 // --- // 100050810 // ENSE   | ARHGAP1     | Cluster0002 |
| 14959599      | ENSECAT00000006684 // ARHGAP27 // Rho GTPase activating protein 27 // --- // EN          | ARHGAP27    | Cluster0002 |
| 15107874      | NM_001081921 // ARNTL // aryl hydrocarbon receptor nuclear translocator-like // --- //   | ARNTL       | Cluster0002 |
| 15032771      | ENSECAT00000017452 // ARRDC2 // arrestin domain containing 2 // --- // ---               | ARRDC2      | Cluster0002 |
| 14989694      | NM_001205056 // ASB3 // ankyrin repeat and SOCS box containing 3 // --- // 100052747 //  | ASB3        | Cluster0002 |
| 15030874      | ENSECAT000000023281 // ATF6B // activating transcription factor 6 beta // --- // 1000593 | ATF6B       | Cluster0002 |
| 14969721      | NM_001242529 // ATG13 // autophagy related 13 // --- // 100050734                        | ATG13       | Cluster0002 |
| 15129390      | XM_001490668 // ATG4A // autophagy related 4A, cysteine peptidase // --- // 100060165 // | ATG4A       | Cluster0002 |
| 15065478      | ENSECAT00000012349 // ATMIN // ATM interactor // --- // 100069801 // XM_001501932 // A   | ATMIN       | Cluster0002 |
| 15102827      | NM_001195525 // ATP5B // ATP synthase, H+ transporting, mitochondrial F1 complex, beta   | ATP5B       | Cluster0002 |
| 14999509      | ENSECAT000000026737 // ATXN7 // ataxin 7 // --- // 100055963 // XM_001489903 // ATXN7 // | ATXN7       | Cluster0002 |
| 15032628      | ENSECAT00000018090 // BABAM1 // BRISC and BRCA1 A complex member 1 // --- // ---         | BABAM1      | Cluster0002 |
| 14941374      | ENSECAT00000005416 // BAG3 // BCL2-associated athanogene 3 // --- // 100065784 // XM_0   | BAG3        | Cluster0002 |
| 15030643      | ENSECAT00000014870 // BAG6 // BCL2-associated athanogene 6 // --- // 100050296           | BAG6        | Cluster0002 |
| 14948644      | ENSECAT00000008241 // BAZ1A // bromodomain adjacent to zinc finger domain, 1A // --- //  | BAZ1A       | Cluster0002 |
| 14950309      | ENSECAT00000013003 // BCKDHA // branched chain keto acid dehydrogenase E1, alpha polype  | BCKDHA      | Cluster0002 |
| 14950528      | ENSECAT00000013680 // BCL3 // B-cell CLL/lymphoma 3 // --- // ---                        | BCL3        | Cluster0002 |
| 15014349      | XM_001499782 // BCL6 // B-cell CLL/lymphoma 6 // --- // 100059642 // ENSECAT0000000568   | BCL6        | Cluster0002 |
| 14980135      | ENSECAT00000017875 // BFA1 // bifunctional apoptosis regulator // --- // 100050577 //    | BFA1        | Cluster0002 |
| 15125188      | XM_001495762 // BOP1 // block of proliferation 1 // --- // 100065050 // ENSECAT00000001  | BOP1        | Cluster0002 |
| 15017241      | XM_001503784 // BSDC1 // BSD domain containing 1 // --- // 100055839 // ENSECAT00000000  | BSDC1       | Cluster0002 |
| 15125853      | NM_001098795 // BSG // basigin (Ok blood group) // --- // 100049616 // ENSECAT000000012  | BSG         | Cluster0002 |
| 15126726      | NM_001098795 // BSG // basigin (Ok blood group) // --- // 100049616 // EF564280 // BSG   | BSG         | Cluster0002 |
| 14942141      | ENSECAT000000024676 // BTRC // beta-transducin repeat containing E3 ubiquitin protein li | BTRC        | Cluster0002 |
| 14941182      | XM_001490046 // BUB3 // budding uninhibited by benzimidazoles 3 homolog (yeast) // ---   | BUB3        | Cluster0002 |
| 15126709      | ENSECAT00000008528 // C19orf6 // chromosome 19 open reading frame 6 // --- // ---        | C19orf6     | Cluster0002 |
| 15033824      | ENSECAT000000023863 // C1QTNF3 // C1q and tumor necrosis factor related protein 3 // --- | C1QTNF3     | Cluster0002 |

|          |                                                                                          |          |             |
|----------|------------------------------------------------------------------------------------------|----------|-------------|
| 15072073 | ENSECAT00000025811 // C4orf52 // chromosome 4 open reading frame 52 // --- // ---        | C4orf52  | Cluster0002 |
| 14958248 | XM_001490865 // CANT1 // calcium activated nucleotidase 1 // --- // 100057405 // ENSEC   | CANT1    | Cluster0002 |
| 14988744 | XM_001498985 // CAPG // capping protein (actin filament), gelsolin-like // --- // 10005  | CAPG     | Cluster0002 |
| 15004101 | ENSECAT00000010445 // CARKD // carbohydrate kinase domain containing // --- // ---       | CARKD    | Cluster0002 |
| 15008128 | ENSECAT00000005749 // CASP8 // caspase 8, apoptosis-related cysteine peptidase // --- /  | CASP8    | Cluster0002 |
| 15018507 | ENSECAT00000018509 // CASP9 // caspase 9, apoptosis-related cysteine peptidase // --- /  | CASP9    | Cluster0002 |
| 15104949 | ENSECAT00000005112 // CBL // Cbl proto-oncogene, E3 ubiquitin protein ligase // --- //   | CBL      | Cluster0002 |
| 15076754 | XM_001491503 // CBLL1 // Cbl proto-oncogene, E3 ubiquitin protein ligase-like 1 // ---   | CBLL1    | Cluster0002 |
| 15043302 | XM_001490027 // CBWD1 // COBW domain containing 1 // --- // 100050598 // ENSECAT000000   | CBWD1    | Cluster0002 |
| 15120493 | ENSECAT00000008399 // CCBE1 // collagen and calcium binding EGF domains 1 // --- // ---  | CCBE1    | Cluster0002 |
| 14934716 | ENSECAT00000006365 // CCDC109A // mitochondrial calcium uniporter // --- // 100072824 /  | CCDC109A | Cluster0002 |
| 14943017 | XM_001503415 // CCDC6 // coiled-coil domain containing 6 // --- // 100062742 // ENSECA   | CCDC6    | Cluster0002 |
| 15006497 | XM_001915413 // CCNT2 // cyclin T2 // --- // 100050510 // ENSECAT00000024357 // CCNT2    | CCNT2    | Cluster0002 |
| 15038286 | NM_001081902 // CD40 // CD40 molecule, TNF receptor superfamily member 5 // --- // 1000  | CD40     | Cluster0002 |
| 15063552 | XM_001499137 // CDC123 // cell division cycle 123 homolog (S. cerevisiae) // --- // 100  | CDC123   | Cluster0002 |
| 15065896 | ENSECAT000000026987 // CDK10 // cyclin-dependent kinase 10 // --- // 100052321 // XM_00  | CDK10    | Cluster0002 |
| 15127821 | XM_001491879 // CDK16 // cyclin-dependent kinase 16 // --- // 100060831 // XM_00336578   | CDK16    | Cluster0002 |
| 14957074 | ENSECAT00000010295 // CDK19 // cyclin-dependent kinase 19 // --- // ---                  | CDK19    | Cluster0002 |
| 15065801 | XM_001488043 // CDT1 // chromatin licensing and DNA replication factor 1 // --- // 1000  | CDT1     | Cluster0002 |
| 15069822 | XM_001499438 // CDYL2 // chromodomain protein, Y-like 2 // --- // 100069707 // ENSECAT   | CDYL2    | Cluster0002 |
| 15104660 | ENSECAT000000025639 // CEP164 // centrosomal protein 164kDa // --- // 100062791 // XM_0  | CEP164   | Cluster0002 |
| 15072923 | ENSECAT000000012839 // CEP170 // centrosomal protein 170kDa // --- // ---                | CEP170   | Cluster0002 |
| 15115639 | XM_001489254 // CEP76 // centrosomal protein 76kDa // --- // 100050324 // XM_003365561   | CEP76    | Cluster0002 |
| 15131559 | XM_001492656 // CFP // complement factor properdin // --- // 100051317 // ENSECAT00000   | CFP      | Cluster0002 |
| 15059308 | NM_001242479 // CHADL // chondroadherin-like // --- // 100034030                         | CHADL    | Cluster0002 |
| 15034605 | ENSECAT00000013582 // CHERP // calcium homeostasis endoplasmic reticulum protein // ---  | CHERP    | Cluster0002 |
| 15064948 | XM_001497119 // CIRH1A // cirrhosis, autosomal recessive 1A (cirhin) // --- // 10006696  | CIRH1A   | Cluster0002 |
| 14991986 | XM_001495749 // CKAP2L // cytoskeleton associated protein 2-like // --- // 100052298 //  | CKAP2L   | Cluster0002 |
| 15077383 | NM_001257104 // CLDN12 // claudin 12 // --- // 100060361 // ENSECAT00000005680 // CLDN   | CLDN12   | Cluster0002 |
| 14981933 | ENSECAT000000009622 // CLINT1 // clathrin interactor 1 // --- // ---                     | CLINT1   | Cluster0002 |
| 14945848 | ENSECAT00000024012 // CLK3 // CDC-like kinase 3 // --- // 100062320 // XM_001917649 //   | CLK3     | Cluster0002 |
| 14950588 | XM_001916976 // CLPTM1 // cleft lip and palate associated transmembrane protein 1 // --  | CLPTM1   | Cluster0002 |
| 15034294 | ENSECAT00000014377 // CLPTM1L // CLPTM1-like // --- // 100071903                         | CLPTM1L  | Cluster0002 |
| 14981640 | ENSECAT00000017599 // CLTB // clathrin, light chain B // --- // ---                      | CLTB     | Cluster0002 |
| 14991168 | ENSECAT00000013227 // CMPK2 // cytidine monophosphate (UMP-CMP) kinase 2, mitochondrial  | CMPK2    | Cluster0002 |
| 14991728 | ENSECAT00000010954 // CNNM4 // cyclin M4 // --- // 100062145                             | CNNM4    | Cluster0002 |
| 15126218 | XM_001914723 // CNOT2 // CCR4-NOT transcription complex, subunit 2 // --- // 100062938   | CNOT2    | Cluster0002 |
| 15082948 | ENSECAT000000021792 // CNOT4 // CCR4-NOT transcription complex, subunit 4 // --- // 1000 | CNOT4    | Cluster0002 |
| 14964801 | XM_001916362 // COG1 // component of oligomeric golgi complex 1 // --- // 100061294 //   | COG1     | Cluster0002 |
| 15034835 | XM_001503394 // COPE // coatomer protein complex, subunit epsilon // --- // 100069610 /  | COPE     | Cluster0002 |
| 14998713 | XM_001488529 // COPG // coatomer protein complex, subunit gamma 1 // --- // 100050080 /  | COPG     | Cluster0002 |
| 14963755 | ENSECAT00000022283 // COPS3 // COP9 constitutive photomorphogenic homolog subunit 3 (Ar  | COPS3    | Cluster0002 |
| 15045218 | XM_001490168 // COQ6 // coenzyme Q6 homolog, monoxygenase (S. cerevisiae) // --- // 10   | COQ6     | Cluster0002 |
| 14976027 | XM_001502009 // CORO1A // coronin, actin binding protein, 1A // --- // 100064170 // EN   | CORO1A   | Cluster0002 |
| 15064272 | ENSECAT00000020690 // CPNE2 // copine II // --- // ---                                   | CPNE2    | Cluster0002 |
| 15101248 | XM_001503265 // CPNE8 // copine VIII // --- // 100064982 // ENSECAT00000016311 // CPNE   | CPNE8    | Cluster0002 |
| 15019217 | XM_001496373 // CPSF3L // cleavage and polyadenylation specific factor 3-like // --- //  | CPSF3L   | Cluster0002 |
| 15098284 | ENSECAT00000016964 // CPSF6 // cleavage and polyadenylation specific factor 6, 68kDa //  | CPSF6    | Cluster0002 |
| 15052893 | XM_001917228 // CRAT // carnitine O-acetyltransferase // --- // 100070062 // ENSECAT00   | CRAT     | Cluster0002 |
| 15086539 | XM_001495407 // CRTC2 // CREB regulated transcription coactivator 2 // --- // 100056571  | CRTC2    | Cluster0002 |
| 15058935 | ENSECAT00000021519 // CSF2RB // colony stimulating factor 2 receptor, beta, low-affinit  | CSF2RB   | Cluster0002 |
| 14945826 | XM_001492384 // CSK // c-src tyrosine kinase // --- // 100051462 // ENSECAT00000014515   | CSK      | Cluster0002 |
| 15129047 | ENSECAT00000009937 // CSTF2 // cleavage stimulation factor, 3 pre-RNA, subunit 2, 64kD   | CSTF2    | Cluster0002 |
| 14946971 | XM_001502842 // CTDSPL2 // CTD (carboxy-terminal domain, RNA polymerase II, polypeptide  | CTDSPL2  | Cluster0002 |

|          |                                                                                          |           |             |
|----------|------------------------------------------------------------------------------------------|-----------|-------------|
| 15092213 | XM_001498786 // CTTNBP2NL // CTTNBP2 N-terminal like // --- // 100059014 // ENSECAT000   | CTTNBP2NL | Cluster0002 |
| 15120713 | NM_001159732 // CYB5A // cytochrome b5 type A (microsomal) // --- // 100052210 // ENSE   | CYB5A     | Cluster0002 |
| 15081965 | ENSECAT00000015009 // CYCS // cytochrome c, somatic // --- // 100053958 // NM_00116401   | CYCS      | Cluster0002 |
| 15058946 | ENSECAT00000026719 // CYTH4 // cytohesin 4 // --- // 100069735 // XM_001499462 // CYTH   | CYTH4     | Cluster0002 |
| 15000425 | XM_001497613 // DAG1 // dystroglycan 1 (dystrophin-associated glycoprotein 1) // --- //  | DAG1      | Cluster0002 |
| 15108641 | XM_001503352 // DAPK3 // death-associated protein kinase 3 // --- // 100061244 // ENSE   | DAPK3     | Cluster0002 |
| 15112387 | ENSECAT00000009578 // DCHS1 // dachsous 1 (Drosophila) // --- // ---                     | DCHS1     | Cluster0002 |
| 14995879 | XM_001491404 // DCP1A // DCP1 decapping enzyme homolog A (S. cerevisiae) // --- // 1000  | DCP1A     | Cluster0002 |
| 15056483 | XM_001492330 // DCTD // dCMP deaminase // --- // 100051279 // ENSECAT00000018587 // LO   | DCTD      | Cluster0002 |
| 15103014 | XM_001489083 // DCTN2 // dynactin 2 (p50) // --- // 100050464 // XM_001489130 // DCTN2   | DCTN2     | Cluster0002 |
| 14982187 | XM_001917648 // DCTN4 // dynactin 4 (p62) // --- // 100071625 // XM_003362785 // DCTN4   | DCTN4     | Cluster0002 |
| 14981501 | ENSECAT00000010318 // DDX41 // DEAD (Asp-Glu-Ala-Asp) box polypeptide 41 // --- // 1000  | DDX41     | Cluster0002 |
| 14966824 | ENSECAT00000013254 // DDX52 // DEAD (Asp-Glu-Ala-Asp) box polypeptide 52 // --- // 1000  | DDX52     | Cluster0002 |
| 15080814 | XM_001495821 // DDX56 // DEAD (Asp-Glu-Ala-Asp) box helicase 56 // --- // 100065131 //   | DDX56     | Cluster0002 |
| 15090516 | XM_001503843 // DEDD // death effector domain containing // --- // 100066256 // XM_001   | DEDD      | Cluster0002 |
| 14936213 | ENSECAT00000022645 // DET1 // de-etiolated homolog 1 (Arabidopsis) // --- // 100053984   | DET1      | Cluster0002 |
| 14969698 | ENSECAT00000020744 // DGKZ // diacylglycerol kinase, zeta // --- // --- // ENSECAT00000  | DGKZ      | Cluster0002 |
| 15000510 | XM_001499602 // DHX30 // DEAH (Asp-Glu-Ala-His) box polypeptide 30 // --- // 100054034   | DHX30     | Cluster0002 |
| 15037905 | ENSECAT00000015014 // DHX35 // DEAH (Asp-Glu-Ala-His) box polypeptide 35 // --- // 1000  | DHX35     | Cluster0002 |
| 15077233 | ENSECAT00000022460 // DMTF1 // cyclin D binding myb-like transcription factor 1 // ---   | DMTF1     | Cluster0002 |
| 14980404 | ENSECAT00000005377 // DNAJA3 // DnaJ (Hsp40) homolog, subfamily A, member 3 // --- // 1  | DNAJA3    | Cluster0002 |
| 15024760 | XM_001490395 // DOK2 // docking protein 2, 56kDa // --- // 100053679 // ENSECAT00000002  | DOK2      | Cluster0002 |
| 14970946 | XM_001492616 // DPP2 // D4, zinc and double PHD fingers family 2 // --- // 100051328 //  | DPP2      | Cluster0002 |
| 15108715 | ENSECAT000000027007 // DPP9 // dipeptidyl-peptidase 9 // --- // 100062517 // XM_0033653  | DPP9      | Cluster0002 |
| 14978672 | XM_003362699 // DTX2 // deltex homolog 2 (Drosophila) // --- // 100060906 // ENSECAT00   | DTX2      | Cluster0002 |
| 15011927 | ENSECAT000000009739 // DVL3 // dishevelled, dsh homolog 3 (Drosophila) // --- // ---     | DVL3      | Cluster0002 |
| 15064787 | XM_001498275 // EDC4 // enhancer of mRNA decapping 4 // --- // 100053605 // ENSECAT000   | EDC4      | Cluster0002 |
| 14973214 | NM_001081785 // EEF1G // eukaryotic translation elongation factor 1 gamma // --- // 100  | EEF1G     | Cluster0002 |
| 14943095 | ENSECAT00000011152 // EGR2 // early growth response 2 // --- // 100062890 // XM_001503   | EGR2      | Cluster0002 |
| 15051121 | XM_001918079 // EHMT1 // euchromatic histone-lysine N-methyltransferase 1 // --- // 100  | EHMT1     | Cluster0002 |
| 15089194 | ENSECAT00000000249 // EIF2D // eukaryotic translation initiation factor 2D // --- // --  | EIF2D     | Cluster0002 |
| 15022756 | XM_001503817 // EIF3I // eukaryotic translation initiation factor 3, subunit I // --- // | EIF3I     | Cluster0002 |
| 15059038 | XM_001501206 // EIF3L // eukaryotic translation initiation factor 3, subunit L // --- // | EIF3L     | Cluster0002 |
| 15108335 | XM_001502745 // EIF3M // eukaryotic translation initiation factor 3, subunit M // --- // | EIF3M     | Cluster0002 |
| 15052696 | XM_001500078 // ENG // endoglin // --- // 100070421 // XM_003364144 // ENG // endoglin   | ENG       | Cluster0002 |
| 15034572 | ENSECAT000000021166 // EPS15L1 // epidermal growth factor receptor pathway substrate 15- | EPS15L1   | Cluster0002 |
| 15100712 | ENSECAT00000016023 // EPS8 // epidermal growth factor receptor pathway substrate 8 // -  | EPS8      | Cluster0002 |
| 14980166 | ENSECAT00000010995 // ERCC4 // excision repair cross-complementing rodent repair defici  | ERCC4     | Cluster0002 |
| 15033132 | XM_001916106 // ERCC8 // excision repair cross-complementing rodent repair deficiency,   | ERCC8     | Cluster0002 |
| 15037603 | ENSECAT00000013208 // ERGIC3 // ERGIC and golgi 3 // --- // ---                          | ERGIC3    | Cluster0002 |
| 15126407 | ENSECAT00000007956 // ESYT2 // extended synaptotagmin-like protein 2 // --- // 10005794  | ESYT2     | Cluster0002 |
| 15081700 | ENSECAT000000021856 // ETV1 // ets variant 1 // --- // 100065470 // XM_001495325 // ETV  | ETV1      | Cluster0002 |
| 15117773 | XM_001495303 // EWSR1 // Ewing sarcoma breakpoint region 1 // --- // 100034010 // ENSE   | EWSR1     | Cluster0002 |
| 14958526 | XM_003362474 // EXOC7 // exocyst complex component 7 // --- // 100059108 // ENSECAT000   | EXOC7     | Cluster0002 |
| 15017478 | XM_001500462 // EYA3 // eyes absent homolog 3 (Drosophila) // --- // 100070791 // ENSE   | EYA3      | Cluster0002 |
| 14994217 | ENSECAT00000024757 // FAM59B // family with sequence similarity 59, member B // --- //   | FAM59B    | Cluster0002 |
| 14935414 | ENSECAT00000017306 // FAM89A // family with sequence similarity 89, member A // --- //   | FAM89A    | Cluster0002 |
| 15069171 | NM_001242528 // FAM96B // family with sequence similarity 96, member B // --- // 100052  | FAM96B    | Cluster0002 |
| 15105822 | XM_001504881 // FARSA // phenylalanyl-tRNA synthetase, alpha subunit // --- // 10006327  | FARSA     | Cluster0002 |
| 15098880 | XM_001495406 // FARSB // phenylalanyl-tRNA synthetase, beta subunit // --- // 100056565  | FARSB     | Cluster0002 |
| 14942833 | ENSECAT00000014464 // FAS // Fas (TNF receptor superfamily, member 6) // --- // 1000716  | FAS       | Cluster0002 |
| 15095342 | ENSECAT00000026686 // FBXL14 // F-box and leucine-rich repeat protein 14 // --- // ---   | FBXL14    | Cluster0002 |
| 15085566 | XM_001503798 // FCER1G // Fc fragment of IgE, high affinity I, receptor for; gamma poly  | FCER1G    | Cluster0002 |
| 14987515 | ENSECAT00000025525 // FCHO2 // FCH domain only 2 // --- // 100065702 // XM_001504693 //  | FCHO2     | Cluster0002 |

|          |                                                                                          |          |             |
|----------|------------------------------------------------------------------------------------------|----------|-------------|
| 14970688 | XM_001488884 // FERMT3 // fermitin family member 3 // --- // 100050011 /// XM_001488969  | FERMT3   | Cluster0002 |
| 15091218 | ENSECAT00000024367 // FLAD1 // FAD1 flavin adenine dinucleotide synthetase homolog (S.   | FLAD1    | Cluster0002 |
| 15105493 | ENSECAT00000022701 // FLI1 // Friend leukemia virus integration 1 // --- // 100064591 /  | FLI1     | Cluster0002 |
| 14965306 | ENSECAT00000024666 // FMNL1 // formin-like 1 // --- // 100064045                         | FMNL1    | Cluster0002 |
| 14978127 | ENSECAT00000015842 // FOXK1 // forkhead box K1 // --- // 100060644 /// XM_001492851 //   | FOXK1    | Cluster0002 |
| 14963856 | ENSECAT00000022376 // FOXK2 // forkhead box K2 // --- // 100056711 /// XM_001490345 //   | FOXK2    | Cluster0002 |
| 14995322 | ENSECAT00000009612 // FOXP1 // forkhead box P1 // --- // 100053199 /// XM_003363048 //   | FOXP1    | Cluster0002 |
| 15049853 | ENSECAT00000013956 // FPGS // folylpolyglutamate synthase // --- // ---                  | FPGS     | Cluster0002 |
| 14970959 | ENSECAT00000007240 // FRMD8 // FERM domain containing 8 // --- // --- // ENSECAT000000   | FRMD8    | Cluster0002 |
| 15126951 | ENSECAT00000000154 // FRMPD4 // FERM and PDZ domain containing 4 // --- // 100050197 //  | FRMPD4   | Cluster0002 |
| 15098306 | ENSECAT00000021508 // FRS2 // fibroblast growth factor receptor substrate 2 // --- // 1  | FRS2     | Cluster0002 |
| 15028370 | ENSECAT00000016043 // FTSJD2 // FtsJ methyltransferase domain containing 2 // --- // --  | FTSJD2   | Cluster0002 |
| 15088549 | XM_001496671 // FUBP1 // far upstream element (FUSE) binding protein 1 // --- // 100066  | FUBP1    | Cluster0002 |
| 15130596 | ENSECAT000000029147 // FUNDC2 // FUN14 domain containing 2 // --- // ---                 | FUNDC2   | Cluster0002 |
| 14934793 | XM_001503903 // FUT11 // fucosyltransferase 11 (alpha (1,3) fucosyltransferase) // ---   | FUT11    | Cluster0002 |
| 15032975 | XM_001500843 // GATAD2A // GATA zinc finger domain containing 2A // --- // 100071147 //  | GATAD2A  | Cluster0002 |
| 15086578 | XM_001495330 // GATAD2B // GATA zinc finger domain containing 2B // --- // 100062097 //  | GATAD2B  | Cluster0002 |
| 15062688 | ENSECAT000000009433 // GDI2 // GDP dissociation inhibitor 2 // --- // ---                | GDI2     | Cluster0002 |
| 15043368 | XM_001491923 // GLIS3 // GLIS family zinc finger 3 // --- // 100051202 /// ENSECAT00000  | GLIS3    | Cluster0002 |
| 14985174 | NM_001081912 // GM2A // GM2 ganglioside activator // --- // 100034082 /// ENSECAT000000  | GM2A     | Cluster0002 |
| 15092410 | XM_001494890 // GNAI3 // guanine nucleotide binding protein (G protein), alpha inhibiti  | GNAI3    | Cluster0002 |
| 15045671 | XM_001497455 // GOLGA5 // golgin A5 // --- // 100053313 /// ENSECAT0000010933 // GOLGA   | GOLGA5   | Cluster0002 |
| 15017600 | XM_001504051 // GPATCH3 // G patch domain containing 3 // --- // 100057040 /// ENSECAT0  | GPATCH3  | Cluster0002 |
| 15044855 | ENSECAT000000006887 // GPHN // gephyrin // --- // 100063078 /// ENSECAT00000006965 // GP | GPHN     | Cluster0002 |
| 15131677 | XM_001495227 // GPKOW // G patch domain and KOW motifs // --- // 100062702 /// XM_00336  | GPKOW    | Cluster0002 |
| 15108952 | ENSECAT00000015263 // GPR108 // G protein-coupled receptor 108 // --- // --- // ENSECA   | GPR108   | Cluster0002 |
| 15003788 | XM_001916057 // GPR180 // G protein-coupled receptor 180 // --- // 100059006 /// ENSECA  | GPR180   | Cluster0002 |
| 14996446 | NM_001166479 // GPX1 // glutathione peroxidase 1 // --- // 100053396 /// ENSECAT00000001 | GPX1     | Cluster0002 |
| 14950384 | ENSECAT000000021007 // GSK3A // glycogen synthase kinase 3 alpha // --- // ---           | GSK3A    | Cluster0002 |
| 15063916 | XM_001915211 // HEATR3 // HEAT repeat containing 3 // --- // 100058410 /// ENSECAT00000  | HEATR3   | Cluster0002 |
| 15026812 | ENSECAT00000011146 // HIVEP1 // human immunodeficiency virus type I enhancer binding pr  | HIVEP1   | Cluster0002 |
| 14936835 | XM_001490810 // HMG20A // high mobility group 20A // --- // 100061369 /// ENSECAT000000  | HMG20A   | Cluster0002 |
| 15018062 | ENSECAT000000008232 // HP1BP3 // heterochromatin protein 1, binding protein 3 // --- //  | HP1BP3   | Cluster0002 |
| 15027712 | NM_001256923 // HSPA1A // heat shock 70kDa protein 1A // --- // 100050827 /// AF397192   | HSPA1A   | Cluster0002 |
| 15111156 | ENSECAT00000014969 // ICAM1 // intercellular adhesion molecule 1 // --- // ---           | ICAM1    | Cluster0002 |
| 15032093 | ENSECAT000000023604 // ICK // intestinal cell (MAK-like) kinase // --- // 100056645 ///  | ICK      | Cluster0002 |
| 14942821 | ENSECAT00000010390 // IFIT3 // interferon-induced protein with tetratricopeptide repeat  | IFIT3    | Cluster0002 |
| 14943690 | XM_001498209 // IFT74 // intraflagellar transport 74 homolog (Chlamydomonas) // --- //   | IFT74    | Cluster0002 |
| 15042300 | XM_001498209 // IFT74 // intraflagellar transport 74 homolog (Chlamydomonas) // --- //   | IFT74    | Cluster0002 |
| 14999113 | ENSECAT00000009909 // IL17RC // interleukin 17 receptor C // --- // 100058271 /// XM_00  | IL17RC   | Cluster0002 |
| 15091244 | ENSECAT000000025853 // IL6R // interleukin 6 receptor // --- // ---                      | IL6R     | Cluster0002 |
| 14967664 | ENSECAT00000017717 // INPP5K // inositol polyphosphate-5-phosphatase K // --- // ---     | INPP5K   | Cluster0002 |
| 15025032 | XM_001493351 // INTS9 // integrator complex subunit 9 // --- // 100061398 /// XM_003364  | INTS9    | Cluster0002 |
| 14996394 | ENSECAT00000017793 // IP6K1 // inositol hexakisphosphate kinase 1 // --- // 100052910 /  | IP6K1    | Cluster0002 |
| 15021917 | ENSECAT00000016749 // IPO13 // importin 13 // --- // 100066178 /// XM_001496543 // IPO1  | IPO13    | Cluster0002 |
| 14955202 | ENSECAT00000019481 // IRF3 // interferon regulatory factor 3 // --- // ---               | IRF3     | Cluster0002 |
| 15078776 | ENSECAT00000010372 // IRF5 // interferon regulatory factor 5 // --- // 100071786 /// XM  | IRF5     | Cluster0002 |
| 15065723 | ENSECAT00000016408 // IRF8 // interferon regulatory factor 8 // --- // 100056218 /// XM  | IRF8     | Cluster0002 |
| 15045772 | NM_001114146 // ISG12(A) // IFN stimulated gene 12(A) // --- // 100064838 /// ENSECAT00  | ISG12(A) | Cluster0002 |
| 15055602 | XM_001490002 // ITGB2 // integrin, beta 2 (complement component 3 receptor 3 and 4 subu  | ITGB2    | Cluster0002 |
| 15047952 | ENSECAT000000025731 // ITPK1 // inositol-tetrakisphosphate 1-kinase // --- // ---        | ITPK1    | Cluster0002 |
| 15069779 | XM_003364638 // KARS // lysyl-tRNA synthetase // --- // 100055335 /// XM_001501578 // K  | KARS     | Cluster0002 |
| 14985828 | XM_001918163 // KDM3B // lysine (K)-specific demethylase 3B // --- // 100062288 /// ENS  | KDM3B    | Cluster0002 |
| 15024699 | ENSECAT000000024971 // KLHL17 // kelch-like 17 (Drosophila) // --- // 100146295 /// XM_0 | KLHL17   | Cluster0002 |

|          |                                                                                         |              |             |
|----------|-----------------------------------------------------------------------------------------|--------------|-------------|
| 15097158 | ENSECAT00000021817 // KRT7 // keratin 7 // --- // 100062790 /// XM_001504375 // KRT7 // | KRT7         | Cluster0002 |
| 14985087 | ENSECAT00000018194 // LARP1 // La ribonucleoprotein domain family, member 1 // --- // 1 | LARP1        | Cluster0002 |
| 14981746 | ENSECAT00000023396 // LCP2 // lymphocyte cytosolic protein 2 (SH2 domain containing leu | LCP2         | Cluster0002 |
| 14958252 | XM_001490950 // LGALS3BP // lectin, galactoside-binding, soluble, 3 binding protein //  | LGALS3BP     | Cluster0002 |
| 14991332 | ENSECAT00000018770 // LIMS1 // LIM and senescent cell antigen-like domains 1 // --- //  | LIMS1        | Cluster0002 |
| 14951037 | ENSECAT00000021415 // LIN7B // lin-7 homolog B (C. elegans) // --- // ---               | LIN7B        | Cluster0002 |
| 14992482 | ENSECAT00000004426 // LOC100049814 // STAM-binding protein-like // --- // 100049814     | LOC100049814 | Cluster0002 |
| 15055715 | ENSECAT00000002632 // LOC100049837 // arylamine N-acetyltransferase 1-like // --- // 10 | LOC100049837 | Cluster0002 |
| 15075266 | XM_001499329 // LOC100049846 // TATA-box-binding protein-like // --- // 100049846 // E  | LOC100049846 | Cluster0002 |
| 15111346 | ENSECAT00000027025 // LOC100049857 // e3 ubiquitin-protein ligase MARCH2-like // --- // | LOC100049857 | Cluster0002 |
| 15113304 | XM_003365441 // LOC100049858 // mediator of RNA polymerase II transcription subunit 15- | LOC100049858 | Cluster0002 |
| 14959534 | XM_001487945 // LOC100049943 // Golgi SNAP receptor complex member 2-like // --- // 100 | LOC100049943 | Cluster0002 |
| 15098340 | ENSECAT00000000020 // LOC100049987 // uncharacterized protein C2orf67-like // --- // 10 | LOC100049987 | Cluster0002 |
| 15118199 | ENSECAT00000023785 // LOC100050056 // malectin-like // --- // 100050056 /// XM_00148852 | LOC100050056 | Cluster0002 |
| 15115610 | ENSECAT00000013895 // LOC100050057 // gamma-soluble NSF attachment protein-like // ---  | LOC100050057 | Cluster0002 |
| 14970700 | XM_001489010 // LOC100050076 // nucleoside diphosphate-linked moiety X motif 22-like // | LOC100050076 | Cluster0002 |
| 15113421 | XM_001489060 // LOC100050121 // small nuclear ribonucleoprotein Sm D3-like // --- // 10 | LOC100050121 | Cluster0002 |
| 14940439 | XM_001489582 // LOC100050137 // AP-4 complex subunit sigma-1-like // --- // 100050137 / | LOC100050137 | Cluster0002 |
| 15013610 | ENSECAT00000014453 // LOC100050155 // PRELI domain-containing protein 1, mitochondrial- | LOC100050155 | Cluster0002 |
| 15065861 | XM_001488825 // LOC100050173 // 60S ribosomal protein L13-like // --- // 100050173 //   | LOC100050173 | Cluster0002 |
| 14973517 | ENSECAT00000017936 // LOC100050210 // tRNA methyltransferase 112 homolog // --- // 1000 | LOC100050210 | Cluster0002 |
| 1508511  | XM_001489360 // LOC100050229 // cleavage stimulation factor subunit 1-like // --- // 10 | LOC100050229 | Cluster0002 |
| 14964064 | XM_001489490 // LOC100050276 // charged multivesicular body protein 6-like // --- // 10 | LOC100050276 | Cluster0002 |
| 14994805 | ENSECAT00000018570 // LOC100050283 // ras-related protein Rab-43-like // --- // 1000502 | LOC100050283 | Cluster0002 |
| 15041749 | XM_001916945 // LOC100050300 // Krueppel-like factor 9-like // --- // 100050300 /// ENS | LOC100050300 | Cluster0002 |
| 14972235 | XM_001489345 // LOC100050344 // peroxisomal membrane protein PEX16-like // --- // 10005 | LOC100050344 | Cluster0002 |
| 15044308 | XM_001495733 // LOC100050367 // galectin-3-like // --- // 100050367 /// ENSECAT00000006 | LOC100050367 | Cluster0002 |
| 15049214 | ENSECAT00000020834 // LOC100050369 // high affinity copper uptake protein 1-like // --- | LOC100050369 | Cluster0002 |
| 15106634 | ENSECAT00000001822 // LOC100050389 // ras-related protein Rab-38-like // --- // 1000503 | LOC100050389 | Cluster0002 |
| 15089119 | XM_001490736 // LOC100050458 // ras-related protein Rab-7L1-like // --- // 100050458 // | LOC100050458 | Cluster0002 |
| 14971988 | XM_001488475 // LOC100050482 // ribonuclease inhibitor-like // --- // 100050482 /// ENS | LOC100050482 | Cluster0002 |
| 15127004 | XM_003365792 // LOC100050487 // ras-related protein Rab-9A-like // --- // 100050487 //  | LOC100050487 | Cluster0002 |
| 15006813 | ENSECAT00000007599 // LOC100050511 // ADP-ribosylation factor-like protein 6-interactin | LOC100050511 | Cluster0002 |
| 15056840 | XM_001490279 // LOC100050524 // golgin subfamily A member 7-like // --- // 100050524 // | LOC100050524 | Cluster0002 |
| 15030545 | XM_001917482 // LOC100050550 // MHC class I antigen 3.7 // --- // 100050550 /// ENSECAT | LOC100050550 | Cluster0002 |
| 15130771 | ENSECAT00000014823 // LOC100050563 // trafficking protein particle complex subunit 2-li | LOC100050563 | Cluster0002 |
| 15079530 | ENSECAT00000004777 // LOC100050611 // caspase-2-like // --- // 100050611 /// XM_0014956 | LOC100050611 | Cluster0002 |
| 15005720 | ENSECAT00000007725 // LOC100050664 // serine/threonine-protein kinase 24-like // --- // | LOC100050664 | Cluster0002 |
| 14950926 | XM_001488495 // LOC100050794 // epithelial membrane protein 3-like // --- // 100050794  | LOC100050794 | Cluster0002 |
| 14972034 | XM_001488795 // LOC100050797 // interferon-induced transmembrane protein 3-like // ---  | LOC100050797 | Cluster0002 |
| 14970848 | XM_001491691 // LOC100050811 // sorting nexin-15-like // --- // 100050811 /// ENSECAT00 | LOC100050811 | Cluster0002 |
| 15029644 | XM_001489822 // LOC100050826 // neuritin-like // --- // 100050826 /// ENSECAT0000000711 | LOC100050826 | Cluster0002 |
| 15054351 | ENSECAT00000014793 // LOC100050835 // cystatin-B-like // --- // 100050835 /// XM_001491 | LOC100050835 | Cluster0002 |
| 15073525 | XM_001915707 // LOC100050843 // regulator of G-protein signaling 18-like // --- // 1000 | LOC100050843 | Cluster0002 |
| 15117372 | ENSECAT00000018670 // LOC100050855 // crk-like protein-like // --- // 100050855 /// XM_ | LOC100050855 | Cluster0002 |
| 14944092 | XM_001492754 // LOC100050879 // tubulin-specific chaperone E-like // --- // 100050879 / | LOC100050879 | Cluster0002 |
| 15101638 | XM_001490907 // LOC100050927 // ankyrin repeat and SOCS box protein 8-like // --- // 10 | LOC100050927 | Cluster0002 |
| 15123700 | XM_001914853 // LOC100050939 // nibrin-like // --- // 100050939 /// ENSECAT00000014953  | LOC100050939 | Cluster0002 |
| 14954951 | XM_001488542 // LOC100050944 // ER lumen protein retaining receptor 1-like // --- // 10 | LOC100050944 | Cluster0002 |
| 14963748 | ENSECAT00000021845 // LOC100050945 // phosphatidylethanolamine N-methyltransferase-like | LOC100050945 | Cluster0002 |
| 15103052 | XM_001489894 // LOC100051005 // cyclin-dependent kinase 4-like // --- // 100051005 ///  | LOC100051005 | Cluster0002 |
| 15126056 | ENSECAT00000014659 // LOC100051023 // integral membrane protein DGCR2/IDD-like // --- / | LOC100051023 | Cluster0002 |
| 15024111 | ENSECAT00000023185 // LOC100051052 // type-1 angiotensin II receptor-associated protein | LOC100051052 | Cluster0002 |
| 14972045 | XM_001489209 // LOC100051094 // BET1-like protein-like // --- // 100051094 /// ENSECAT0 | LOC100051094 | Cluster0002 |

|          |                                                                                            |              |             |
|----------|--------------------------------------------------------------------------------------------|--------------|-------------|
| 14949479 | XM_001492237 // LOC100051102 // RNA-binding protein 42-like // --- // 100051102 /// XM_    | LOC100051102 | Cluster0002 |
| 15018553 | XM_001492165 // LOC100051122 // mitotic spindle assembly checkpoint protein MAD2B-like     | LOC100051122 | Cluster0002 |
| 15038755 | XM_001915306 // LOC100051201 // proteasomal ubiquitin receptor ADRM1-like // --- // 100    | LOC100051201 | Cluster0002 |
| 15027480 | ENSECAT00000024112 // LOC100051230 // 28S ribosomal protein S18b, mitochondrial-like //    | LOC100051230 | Cluster0002 |
| 15099853 | ENSECAT00000023705 // LOC100051294 // uncharacterized protein C12orf4 homolog // --- //    | LOC100051294 | Cluster0002 |
| 14958544 | XM_001915669 // LOC100051325 // signal recognition particle 68 kDa protein-like // --- //  | LOC100051325 | Cluster0002 |
| 14959863 | XM_001490840 // LOC100051326 // protein LSM12 homolog // --- // 100051326 /// ENSECAT00    | LOC100051326 | Cluster0002 |
| 14999822 | XM_001915127 // LOC100051333 // protein kinase C delta type-like // --- // 100051333 //    | LOC100051333 | Cluster0002 |
| 15003426 | ENSECAT00000009881 // LOC100051337 // epithelial-stromal interaction protein 1-like //     | LOC100051337 | Cluster0002 |
| 15084114 | XM_001493038 // LOC100051363 // POU domain, class 2, transcription factor 1-like // --- // | LOC100051363 | Cluster0002 |
| 14974452 | ENSECAT00000020571 // LOC100051383 // toll-interacting protein-like // --- // 100051383    | LOC100051383 | Cluster0002 |
| 15102567 | XM_001504778 // LOC100051450 // CD63 antigen-like // --- // 100051450 /// ENSECAT000000    | LOC100051450 | Cluster0002 |
| 15131576 | XM_001492729 // LOC100051459 // protein UXT-like // --- // 100051459 /// ENSECAT0000001    | LOC100051459 | Cluster0002 |
| 14995050 | ENSECAT000000021499 // LOC100051473 // transcription cofactor vestigial-like protein 4-I   | LOC100051473 | Cluster0002 |
| 15027840 | XM_001493316 // LOC100051483 // lysosomal thioesterase PPT2-like // --- // 100051483 //    | LOC100051483 | Cluster0002 |
| 15045880 | ENSECAT000000020074 // LOC100051490 // cyclin-K-like // --- // 100051490                   | LOC100051490 | Cluster0002 |
| 15097530 | XM_001504781 // LOC100051518 // ORM1-like protein 2-like // --- // 100051518 /// ENSECA    | LOC100051518 | Cluster0002 |
| 14963647 | XM_001488126 // LOC100051522 // serine hydroxymethyltransferase, cytosolic-like // --- //  | LOC100051522 | Cluster0002 |
| 14948874 | XM_001494060 // LOC100051535 // 40S ribosomal protein S29-like // --- // 100051535 ///     | LOC100051535 | Cluster0002 |
| 14949543 | ENSECAT000000007805 // LOC100051536 // gamma-secretase subunit PEN-2-like // --- // 1000   | LOC100051536 | Cluster0002 |
| 14971062 | XM_001494184 // LOC100051541 // histone acetyltransferase KAT5-like // --- // 100051541    | LOC100051541 | Cluster0002 |
| 15081477 | XM_001492902 // LOC100051572 // BET1 homolog // --- // 100051572 /// ENSECAT00000025977    | LOC100051572 | Cluster0002 |
| 14940251 | ENSECAT000000026310 // LOC100051589 // interferon regulatory factor 9-like // --- // 100   | LOC100051589 | Cluster0002 |
| 14949548 | XM_001492756 // LOC100051603 // protein lin-37 homolog // --- // 100051603 /// ENSECAT0    | LOC100051603 | Cluster0002 |
| 14995989 | ENSECAT000000000752 // LOC100051614 // glycosyltransferase 8 domain-containing protein 1   | LOC100051614 | Cluster0002 |
| 15027858 | XM_001493452 // LOC100051626 // e3 ubiquitin-protein ligase RNF5-like // --- // 1000516    | LOC100051626 | Cluster0002 |
| 15038914 | XM_001495050 // LOC100051629 // dnaJ homolog subfamily C member 5-like // --- // 100051    | LOC100051629 | Cluster0002 |
| 15111775 | XM_001494053 // LOC100051651 // protein EMSY-like // --- // 100051651 /// ENSECAT000000    | LOC100051651 | Cluster0002 |
| 15024309 | ENSECAT000000019902 // LOC100051697 // SPRY domain-containing SOCS box protein 1-like //   | LOC100051697 | Cluster0002 |
| 15041299 | XM_001495344 // LOC100051702 // regulator of G-protein signaling 19-like // --- // 1000    | LOC100051702 | Cluster0002 |
| 15119714 | ENSECAT000000028913 // LOC100051723 // oxysterol-binding protein-related protein 1-like    | LOC100051723 | Cluster0002 |
| 14953710 | ENSECAT000000019582 // LOC100051740 // TYRO protein tyrosine kinase-binding protein-like   | LOC100051740 | Cluster0002 |
| 15111832 | XM_001494844 // LOC100051780 // 40S ribosomal protein S3-like // --- // 100051780 /// E    | LOC100051780 | Cluster0002 |
| 14963678 | XM_001918207 // LOC100051793 // protein flightless-1 homolog // --- // 100051793 /// EN    | LOC100051793 | Cluster0002 |
| 15131614 | ENSECAT000000010426 // LOC100051797 // mitochondrial import inner membrane translocase s   | LOC100051797 | Cluster0002 |
| 15070839 | XM_001492667 // LOC100051833 // 60S ribosomal protein L21-like // --- // 100051833 ///     | LOC100051833 | Cluster0002 |
| 15119752 | XM_001494100 // LOC100051844 // protein SSXT-like // --- // 100051844 /// ENSECAT000000    | LOC100051844 | Cluster0002 |
| 14995095 | XM_001494063 // LOC100051933 // transmembrane protein 111-like // --- // 100051933 ///     | LOC100051933 | Cluster0002 |
| 15066585 | ENSECAT000000019091 // LOC100051954 // transmembrane protein 150C-like // --- // 1000519   | LOC100051954 | Cluster0002 |
| 14951141 | XM_001491984 // LOC100051978 // 40S ribosomal protein S11-like // --- // 100051978 ///     | LOC100051978 | Cluster0002 |
| 15131653 | ENSECAT000000022104 // LOC100051983 // transcription factor E3-like // --- // 100051983    | LOC100051983 | Cluster0002 |
| 15016270 | ENSECAT000000023840 // LOC100052003 // protein O-linked-mannose beta-1,2-N-acetylglucosa   | LOC100052003 | Cluster0002 |
| 15097672 | XM_003365264 // LOC100052035 // myosin light polypeptide 6-like // --- // 100052035 ///    | LOC100052035 | Cluster0002 |
| 14965544 | XM_001492387 // LOC100052050 // interferon-induced 35 kDa protein-like // --- // 100052    | LOC100052050 | Cluster0002 |
| 14971156 | ENSECAT000000026135 // LOC100052051 // barrier-to-autointegration factor-like // --- //    | LOC100052051 | Cluster0002 |
| 15073844 | XM_001495138 // LOC100052076 // mitochondrial import inner membrane translocase subunit    | LOC100052076 | Cluster0002 |
| 14963704 | ENSECAT000000020441 // LOC100052098 // ATP synthase mitochondrial F1 complex assembly fa   | LOC100052098 | Cluster0002 |
| 15128012 | XM_001495293 // LOC100052104 // proteolipid protein 2-like // --- // 100052104 /// ENSE    | LOC100052104 | Cluster0002 |
| 14992966 | XM_001917544 // LOC100052114 // poly(A) polymerase gamma-like // --- // 100052114 /// E    | LOC100052114 | Cluster0002 |
| 14999142 | XM_001494365 // LOC100052115 // protein jagunal homolog 1-like // --- // 100052115 ///     | LOC100052115 | Cluster0002 |
| 14996124 | XM_001494476 // LOC100052116 // abhydrolase domain-containing protein 14B-like // --- //   | LOC100052116 | Cluster0002 |
| 14972570 | XM_001488291 // LOC100052157 // olfactory receptor 5M9-like // --- // 100052157 /// ENS    | LOC100052157 | Cluster0002 |
| 14972175 | XM_001488298 // LOC100052172 // COMM domain-containing protein 9-like // --- // 1000521    | LOC100052172 | Cluster0002 |
| 15055220 | ENSECAT000000011402 // LOC100052191 // quinone oxidoreductase-like protein 1-like // ---   | LOC100052191 | Cluster0002 |

|          |                                                                                            |              |             |
|----------|--------------------------------------------------------------------------------------------|--------------|-------------|
| 15064330 | XM_001494211 // LOC100052195 // DNA-directed RNA polymerase II subunit RPB3-like // ---    | LOC100052195 | Cluster0002 |
| 15074750 | ENSECAT000000022656 // LOC100052198 // ADP-ribosylation factor-like protein 8A-like // -   | LOC100052198 | Cluster0002 |
| 15043689 | ENSECAT000000026587 // LOC100052253 // perilipin-2-like // --- // 100052253 /// XM_00191   | LOC100052253 | Cluster0002 |
| 14946015 | XM_001494920 // LOC100052291 // sentrin-specific protease 8-like // --- // 100052291 //    | LOC100052291 | Cluster0002 |
| 14959983 | ENSECAT000000019623 // LOC100052295 // beclin-1-like // --- // 100052295 /// XM_00149322   | LOC100052295 | Cluster0002 |
| 15045469 | XM_001493951 // LOC100052429 // SRA stem-loop-interacting RNA-binding protein, mitochon    | LOC100052429 | Cluster0002 |
| 15100078 | XM_003365166 // LOC100052443 // myeloid leukemia factor 2-like // --- // 100052443 //      | LOC100052443 | Cluster0002 |
| 14996262 | ENSECAT000000016313 // LOC100052473 // tumor suppressor candidate 2-like // --- // 10005   | LOC100052473 | Cluster0002 |
| 15036859 | ENSECAT000000022931 // LOC100052483 // UPF0687 protein C20orf27-like // --- // 100052483   | LOC100052483 | Cluster0002 |
| 14965646 | ENSECAT000000013111 // LOC100052528 // tubulin gamma-2 chain-like // --- // 100052528 //   | LOC100052528 | Cluster0002 |
| 15039563 | XM_001496329 // LOC100052544 // inosine triphosphate pyrophosphatase-like // --- // 100    | LOC100052544 | Cluster0002 |
| 14955587 | ENSECAT000000013117 // LOC100052583 // leukocyte receptor cluster member 1-like // --- /   | LOC100052583 | Cluster0002 |
| 14965653 | XM_001493847 // LOC100052586 // tubulin gamma-1 chain-like // --- // 100052586 /// ENSE    | LOC100052586 | Cluster0002 |
| 15069031 | ENSECAT000000017874 // LOC100052607 // aspartate aminotransferase, mitochondrial-like //   | LOC100052607 | Cluster0002 |
| 15095725 | XM_001497472 // LOC100052671 // triosephosphate isomerase-like // --- // 100052671 //      | LOC100052671 | Cluster0002 |
| 15114154 | ENSECAT000000007660 // LOC100052676 // signal peptide peptidase-like 3-like // --- // 10   | LOC100052676 | Cluster0002 |
| 15009906 | XM_001497963 // LOC100052812 // methyltransferase-like protein 5-like // --- // 1000528    | LOC100052812 | Cluster0002 |
| 15047046 | XM_001499883 // LOC100052868 // phosphatidylinositol N-acetylglucosaminyltransferase su    | LOC100052868 | Cluster0002 |
| 15100091 | ENSECAT000000018013 // LOC100052934 // prohibitin-2-like // --- // 100052934 /// XM_0014   | LOC100052934 | Cluster0002 |
| 15037005 | XM_001497067 // LOC100052969 // isocitrate dehydrogenase [NAD] subunit beta, mitochondr    | LOC100052969 | Cluster0002 |
| 14960117 | XM_001494956 // LOC100053004 // ras-related protein Rab-5C-like // --- // 100053004 ///    | LOC100053004 | Cluster0002 |
| 14971463 | ENSECAT000000013162 // LOC100053005 // ribosomal protein S6 kinase beta-2-like // --- //   | LOC100053005 | Cluster0002 |
| 15037017 | XM_001497470 // LOC100053021 // small nuclear ribonucleoprotein-associated proteins B a    | LOC100053021 | Cluster0002 |
| 15068371 | ENSECAT000000002811 // LOC100053044 // uncharacterized LOC100053044 // --- // 100053044    | LOC100053044 | Cluster0002 |
| 14965720 | ENSECAT000000018960 // LOC100053094 // NF-kappa-B inhibitor-interacting Ras-like protein   | LOC100053094 | Cluster0002 |
| 15114171 | ENSECAT000000006233 // LOC100053127 // 2-methoxy-6-polypropenyl-1,4-benzoquinol methylase, | LOC100053127 | Cluster0002 |
| 14992180 | XM_001498803 // LOC100053147 // e3 ubiquitin-protein ligase RNF181-like // --- // 10005    | LOC100053147 | Cluster0002 |
| 14996429 | XM_001497632 // LOC100053200 // nicotin-1-like // --- // 100053200 /// ENSECAT0000000116   | LOC100053200 | Cluster0002 |
| 14971495 | XM_001498106 // LOC100053249 // glutathione S-transferase P-like // --- // 100053249 //    | LOC100053249 | Cluster0002 |
| 15023737 | XM_001914692 // LOC100053258 // adaptin ear-binding coat-associated protein 2-like // -    | LOC100053258 | Cluster0002 |
| 15039736 | XM_001498911 // LOC100053261 // proteasome inhibitor PI31 subunit-like // --- // 100053    | LOC100053261 | Cluster0002 |
| 15030167 | XM_001505039 // LOC100053279 // histone H2B type 1-K-like // --- // 100053279 /// ENSEC    | LOC100053279 | Cluster0002 |
| 15072675 | ENSECAT000000026437 // LOC100053283 // protein FAM193A-like // --- // 100053283 /// ENSE   | LOC100053283 | Cluster0002 |
| 14963787 | ENSECAT000000023675 // LOC100053286 // dehydrogenase/reductase SDR family member 7B-like   | LOC100053286 | Cluster0002 |
| 15016514 | XM_001498548 // LOC100053305 // elongation of very long chain fatty acids protein 1-lik    | LOC100053305 | Cluster0002 |
| 15126067 | ENSECAT000000015346 // LOC100053332 // protein DGCR14-like // --- // 100053332 /// XM_00   | LOC100053332 | Cluster0002 |
| 14971519 | ENSECAT000000010424 // LOC100053392 // NADH dehydrogenase [ubiquinone] iron-sulfur prote   | LOC100053392 | Cluster0002 |
| 15118238 | XM_001488666 // LOC100053420 // cytochrome c oxidase subunit 6A1, mitochondrial-like //    | LOC100053420 | Cluster0002 |
| 15028217 | XM_001918090 // LOC100053449 // 60S ribosomal protein L10a-like // --- // 100053449 ///    | LOC100053449 | Cluster0002 |
| 15030165 | XM_001505043 // LOC100053472 // histone H2B type 1-J-like // --- // 100053472 /// ENSEC    | LOC100053472 | Cluster0002 |
| 15030131 | XM_001497402 // LOC100053499 // histone H2B type 1-like // --- // 100053499 /// ENSECAT    | LOC100053499 | Cluster0002 |
| 15074323 | XM_001488034 // LOC100053608 // 3 (2 ),5 -bisphosphate nucleotidase 1-like // --- // 10    | LOC100053608 | Cluster0002 |
| 15117264 | ENSECAT000000013321 // LOC100053618 // macrophage migration inhibitory factor-like // --   | LOC100053618 | Cluster0002 |
| 14953461 | XM_001488752 // LOC100053634 // cytochrome b-c1 complex subunit Rieske, mitochondrial-l    | LOC100053634 | Cluster0002 |
| 14996539 | XM_001498296 // LOC100053641 // glutaminyl-tRNA synthetase-like // --- // 100053641 ///    | LOC100053641 | Cluster0002 |
| 15022164 | XM_001503121 // LOC100053643 // peptidyl-prolyl cis-trans isomerase H-like // --- // 10    | LOC100053643 | Cluster0002 |
| 14992400 | XM_001500046 // LOC100053688 // serine protease HTRA2, mitochondrial-like // --- // 100    | LOC100053688 | Cluster0002 |
| 15056734 | XM_001488787 // LOC100053704 // protein farnesyltransferase/geranylgeranyltransferase t    | LOC100053704 | Cluster0002 |
| 14998666 | XM_001488819 // LOC100053785 // monoglyceride lipase-like // --- // 100053785 /// ENSEC    | LOC100053785 | Cluster0002 |
| 15085655 | XM_001504441 // LOC100053868 // CD48 antigen-like // --- // 100053868 /// ENSECAT000000    | LOC100053868 | Cluster0002 |
| 15095973 | ENSECAT000000015525 // LOC100053911 // gamma-aminobutyric acid receptor-associated prote   | LOC100053911 | Cluster0002 |
| 14959379 | XM_001500833 // LOC100053934 // SWI/SNF-related matrix-associated actin-dependent regul    | LOC100053934 | Cluster0002 |
| 15001139 | ENSECAT000000002299 // LOC100053940 // myeloid differentiation primary response protein    | LOC100053940 | Cluster0002 |
| 15069423 | ENSECAT000000009199 // LOC100054003 // chromosome transmission fidelity protein 8 homolo   | LOC100054003 | Cluster0002 |

|          |                                                                                          |              |             |
|----------|------------------------------------------------------------------------------------------|--------------|-------------|
| 14978256 | ENSECAT00000012348 // LOC100054023 // Golgi to ER traffic protein 4 homolog // --- // 1  | LOC100054023 | Cluster0002 |
| 14951689 | ENSECAT00000010799 // LOC100054029 // leukocyte immunoglobulin-like receptor subfamily   | LOC100054029 | Cluster0002 |
| 15101335 | ENSECAT00000012553 // LOC100054055 // YY1-associated factor 2-like // --- // 100054055   | LOC100054055 | Cluster0002 |
| 15068311 | XM_001917737 // LOC100054064 // alpha-2-macroglobulin receptor-associated protein-like   | LOC100054064 | Cluster0002 |
| 15035960 | XM_001500700 // LOC100054195 // UPF0489 protein C5orf22-like // --- // 100054195 // EN   | LOC100054195 | Cluster0002 |
| 14969914 | XM_001489004 // LOC100054215 // olfactory receptor 10A7-like // --- // 100054215 // EN   | LOC100054215 | Cluster0002 |
| 14965055 | ENSECAT00000015308 // LOC100054228 // translational activator of cytochrome c oxidase 1  | LOC100054228 | Cluster0002 |
| 15117284 | XM_001489018 // LOC100054251 // cationic amino acid transporter 4-like // --- // 100054  | LOC100054251 | Cluster0002 |
| 15027586 | XM_001489019 // LOC100054254 // MHC class I polypeptide-related sequence B-like // ---   | LOC100054254 | Cluster0002 |
| 14972593 | XM_001489022 // LOC100054258 // olfactory receptor 1019-like // --- // 100054258 // EN   | LOC100054258 | Cluster0002 |
| 14973472 | ENSECAT00000021404 // LOC100054275 // atlastin-3-like // --- // 100054275 // XM_001488   | LOC100054275 | Cluster0002 |
| 15030145 | XM_001498193 // LOC100054284 // histone H3.1-like // --- // 100054284 // ENSECAT000000   | LOC100054284 | Cluster0002 |
| 14969916 | XM_001489042 // LOC100054307 // olfactory receptor 5AP2-like // --- // 100054307 // EN   | LOC100054307 | Cluster0002 |
| 15086997 | XM_001488599 // LOC100054350 // splicing factor 3B subunit 4-like // --- // 100054350 /  | LOC100054350 | Cluster0002 |
| 15045850 | XM_001489078 // LOC100054383 // poly(A) polymerase alpha-like // --- // 100054383 // E   | LOC100054383 | Cluster0002 |
| 15053552 | ENSECAT00000005235 // LOC100054431 // CGG triplet repeat-binding protein 1-like // ---   | LOC100054431 | Cluster0002 |
| 15022437 | XM_001503545 // LOC100054471 // probable U3 small nucleolar RNA-associated protein 11-1  | LOC100054471 | Cluster0002 |
| 15016778 | ENSECAT00000012199 // LOC100054519 // four and a half LIM domains protein 3-like // ---  | LOC100054519 | Cluster0002 |
| 15118294 | ENSECAT00000025211 // LOC100054578 // sin3 histone deacetylase corepressor complex comp  | LOC100054578 | Cluster0002 |
| 15040027 | XM_001501536 // LOC100054650 // eukaryotic translation initiation factor 6-like // ---   | LOC100054650 | Cluster0002 |
| 14960581 | XM_001501076 // LOC100054686 // protein C17orf37 homolog // --- // 100054686 // ENSECA   | LOC100054686 | Cluster0002 |
| 14993745 | ENSECAT00000015187 // LOC100054688 // xanthine dehydrogenase/oxidase-like // --- // 100  | LOC100054688 | Cluster0002 |
| 15051573 | ENSECAT00000018079 // LOC100054749 // endoplasmic reticulum resident protein 44-like //  | LOC100054749 | Cluster0002 |
| 15059001 | ENSECAT00000011392 // LOC100054799 // nucleolar protein 12-like // --- // 100054799 //   | LOC100054799 | Cluster0002 |
| 14970661 | XM_001489294 // LOC100054829 // ubiquitin thioesterase OTUB1-like // --- // 100054829 /  | LOC100054829 | Cluster0002 |
| 14993900 | ENSECAT00000019494 // LOC100054872 // BRCA1-A complex subunit BRE-like // --- // 100054  | LOC100054872 | Cluster0002 |
| 15016938 | XM_001503613 // LOC100054878 // 28S ribosomal protein S15, mitochondrial-like // --- //  | LOC100054878 | Cluster0002 |
| 15044120 | XM_001917854 // LOC100054905 // spindlin-1-like // --- // 100054905 // ENSECAT000000026  | LOC100054905 | Cluster0002 |
| 15132747 | ENSECAT00000005033 // LOC100054910 // importin subunit alpha-2-like // --- // 100054910  | LOC100054910 | Cluster0002 |
| 15025108 | XM_001496538 // LOC100054913 // PIN2/TERF1-interacting telomerase inhibitor 1-like // -  | LOC100054913 | Cluster0002 |
| 15031643 | XM_001501628 // LOC100054928 // male-enhanced antigen 1-like // --- // 100054928 // EN   | LOC100054928 | Cluster0002 |
| 15059067 | ENSECAT000000025369 // LOC100054935 // DNA-directed RNA polymerases I, II, and III subun | LOC100054935 | Cluster0002 |
| 15121402 | XM_001914675 // LOC100054947 // v-type proton ATPase subunit H-like // --- // 100054947  | LOC100054947 | Cluster0002 |
| 15086918 | XM_001490481 // LOC100054948 // cathepsin S-like // --- // 100054948 // ENSECAT00000002  | LOC100054948 | Cluster0002 |
| 14974360 | XM_001494157 // LOC100055087 // interferon regulatory factor 7-like // --- // 100055087  | LOC100055087 | Cluster0002 |
| 15044235 | ENSECAT00000012109 // LOC100055223 // hippocampus abundant transcript-like protein 1-li  | LOC100055223 | Cluster0002 |
| 14958079 | XM_001488427 // LOC100055281 // protein FAM195B-like // --- // 100055281 // ENSECAT000   | LOC100055281 | Cluster0002 |
| 14940123 | ENSECAT00000006600 // LOC100055307 // neuroguidin-like // --- // 100055307               | LOC100055307 | Cluster0002 |
| 14966049 | ENSECAT00000000672 // LOC100055317 // 39S ribosomal protein L45, mitochondrial-like //   | LOC100055317 | Cluster0002 |
| 15031711 | ENSECAT00000018028 // LOC100055327 // protein YIPF3-like // --- // 100055327 // XM_001   | LOC100055327 | Cluster0002 |
| 15037743 | XM_001502264 // LOC100055328 // protein MANBAL-like // --- // 100055328 // ENSECAT0000   | LOC100055328 | Cluster0002 |
| 15091547 | XM_001491678 // LOC100055347 // tumor necrosis factor alpha-induced protein 8-like prot  | LOC100055347 | Cluster0002 |
| 15040286 | XM_003363924 // LOC100055373 // bladder cancer-associated protein-like // --- // 100055  | LOC100055373 | Cluster0002 |
| 15091539 | ENSECAT000000025732 // LOC100055389 // sodium channel modifier 1-like // --- // 10005538 | LOC100055389 | Cluster0002 |
| 15111213 | XM_001493654 // LOC100055392 // peptidyl-prolyl cis-trans isomerase NIMA-interacting 1-  | LOC100055392 | Cluster0002 |
| 14966080 | XM_001501874 // LOC100055406 // 39S ribosomal protein L10, mitochondrial-like // --- //  | LOC100055406 | Cluster0002 |
| 15123877 | ENSECAT000000022575 // LOC100055428 // uncharacterized protein C8orf37 homolog // --- // | LOC100055428 | Cluster0002 |
| 15111217 | XM_001493676 // LOC100055431 // ubiquitin-like protein 5-like // --- // 100055431 // E   | LOC100055431 | Cluster0002 |
| 15030434 | ENSECAT00000009940 // LOC100055517 // nurim-like // --- // 100055517 // XM_001491340 /   | LOC100055517 | Cluster0002 |
| 14951122 | XM_001489661 // LOC100055522 // fms-related tyrosine kinase 3 ligand-like // --- // 100  | LOC100055522 | Cluster0002 |
| 14994113 | ENSECAT00000011520 // LOC100055570 // transmembrane protein 214-like // --- // 10005557  | LOC100055570 | Cluster0002 |
| 15078357 | ENSECAT00000013011 // LOC100055586 // dnaJ homolog subfamily B member 9-like // --- //   | LOC100055586 | Cluster0002 |
| 14963988 | ENSECAT00000011767 // LOC100055613 // hepatocyte growth factor-regulated tyrosine kinas  | LOC100055613 | Cluster0002 |
| 14940101 | XM_001493694 // LOC100055644 // polyadenylate-binding protein 2-like // --- // 10005564  | LOC100055644 | Cluster0002 |



|          |                                                                                          |              |             |
|----------|------------------------------------------------------------------------------------------|--------------|-------------|
| 15003205 | XM_001488678 // LOC100055705 // importin subunit alpha-3-like // --- // 100055705 /// E  | LOC100055705 | Cluster0002 |
| 15051240 | ENSECAT00000019337 // LOC100055711 // uncharacterized protein KIAA1539-like // --- // 1  | LOC100055711 | Cluster0002 |
| 14994221 | XM_001502813 // LOC100055747 // ras-related protein Rab-10-like // --- // 100055747 ///  | LOC100055747 | Cluster0002 |
| 15063264 | XM_003364353 // LOC100055759 // COMM domain-containing protein 3-like // --- // 1000557  | LOC100055759 | Cluster0002 |
| 14955199 | XM_001917334 // LOC100055781 // ras-related protein R-Ras-like // --- // 100055781 ///   | LOC100055781 | Cluster0002 |
| 15082409 | ENSECAT00000014657 // LOC100055933 // transcription factor EC-like // --- // 100055933   | LOC100055933 | Cluster0002 |
| 15017254 | XM_001503810 // LOC100055965 // myotubularin-related protein 9-like // --- // 100055965  | LOC100055965 | Cluster0002 |
| 14971836 | XM_001489918 // LOC100055991 // transaldolase-like // --- // 100055991 /// ENSECAT00000  | LOC100055991 | Cluster0002 |
| 15127605 | ENSECAT00000002908 // LOC100055994 // mid1-interacting protein 1-like // --- // 1000559  | LOC100055994 | Cluster0002 |
| 15075817 | XM_001489928 // LOC100056012 // brachyury protein-like // --- // 100056012 /// ENSECAT0  | LOC100056012 | Cluster0002 |
| 15018529 | ENSECAT00000014686 // LOC100056045 // uncharacterized protein KIAA2013 homolog // --- /  | LOC100056045 | Cluster0002 |
| 15059461 | XM_001502727 // LOC100056050 // UPF0466 protein C22orf32, mitochondrial-like // --- //   | LOC100056050 | Cluster0002 |
| 15094190 | XM_001492847 // LOC100056095 // AN1-type zinc finger protein 2B-like // --- // 10005609  | LOC100056095 | Cluster0002 |
| 15017354 | ENSECAT00000022702 // LOC100056122 // peflin-like // --- // 100056122 /// XM_001503887   | LOC100056122 | Cluster0002 |
| 15038136 | ENSECAT00000014936 // LOC100056125 // elafin-like // --- // 100056125 /// XM_001503186   | LOC100056125 | Cluster0002 |
| 15123048 | ENSECAT00000014351 // LOC100056139 // transcription factor E2F5-like // --- // 10005613  | LOC100056139 | Cluster0002 |
| 15055586 | XM_001490058 // LOC100056215 // ubiquitin-conjugating enzyme E2 G2-like // --- // 10005  | LOC100056215 | Cluster0002 |
| 14963903 | ENSECAT00000010567 // LOC100056238 // COP9 signalosome complex subunit 1-like // --- //  | LOC100056238 | Cluster0002 |
| 14990739 | XM_001503183 // LOC100056247 // pre-mRNA branch site protein p14-like // --- // 1000562  | LOC100056247 | Cluster0002 |
| 15038597 | ENSECAT00000013948 // LOC100056253 // vesicle-associated membrane protein-associated pr  | LOC100056253 | Cluster0002 |
| 14955261 | XM_001493330 // LOC100056315 // nuclear pore glycoprotein p62-like // --- // 100056315   | LOC100056315 | Cluster0002 |
| 15085326 | ENSECAT00000003128 // LOC100056345 // UPF0739 protein C1orf74 homolog // --- // 1000563  | LOC100056345 | Cluster0002 |
| 14940052 | ENSECAT00000016572 // LOC100056354 // mitochondrial inner membrane protein OXA1L-like /  | LOC100056354 | Cluster0002 |
| 15091398 | ENSECAT00000022278 // LOC100056390 // Friend of PRMT1 protein-like // --- // 100056390   | LOC100056390 | Cluster0002 |
| 14990846 | XM_001503353 // LOC100056409 // lysosomal-associated transmembrane protein 4A-like // -  | LOC100056409 | Cluster0002 |
| 15091393 | ENSECAT000000021710 // LOC100056434 // SNARE-associated protein Snapin-like // --- // 10 | LOC100056434 | Cluster0002 |
| 15132026 | XM_001490186 // LOC100056440 // PDZ domain-containing protein 11-like // --- // 1000564  | LOC100056440 | Cluster0002 |
| 14972220 | ENSECAT00000025635 // LOC100056452 // synaptotagmin-13-like // --- // 100056452 /// XM_  | LOC100056452 | Cluster0002 |
| 15068197 | ENSECAT00000025766 // LOC100056472 // protein S100-P-like // --- // 100056472 /// XM_00  | LOC100056472 | Cluster0002 |
| 15044204 | XM_001490235 // LOC100056530 // uncharacterized LOC100056530 // --- // 100056530 /// EN  | LOC100056530 | Cluster0002 |
| 14966386 | ENSECAT00000016323 // LOC100056543 // cytochrome c oxidase assembly protein COX11, mito  | LOC100056543 | Cluster0002 |
| 15024766 | XM_003364489 // LOC100056631 // nucleoside diphosphate-linked moiety X motif 18-like //  | LOC100056631 | Cluster0002 |
| 14980249 | XM_001916473 // LOC100056639 // cytosolic Fe-S cluster assembly factor NUBP1-like // --  | LOC100056639 | Cluster0002 |
| 15027391 | ENSECAT00000016672 // LOC100056703 // DNA-directed RNA polymerase I subunit RPA12-like   | LOC100056703 | Cluster0002 |
| 15106013 | XM_001490341 // LOC100056704 // transcription elongation factor 1 homolog // --- // 100  | LOC100056704 | Cluster0002 |
| 14970888 | XM_001492016 // LOC100056723 // 39S ribosomal protein L49, mitochondrial-like // --- //  | LOC100056723 | Cluster0002 |
| 15041011 | ENSECAT00000000477 // LOC100056734 // protein slowmo homolog 2-like // --- // 100056734  | LOC100056734 | Cluster0002 |
| 14947149 | ENSECAT00000012882 // LOC100056798 // calpain-3-like // --- // 100056798 /// ENSECAT000  | LOC100056798 | Cluster0002 |
| 14940028 | ENSECAT00000003088 // LOC100056825 // abhydrolase domain-containing protein 4-like // -  | LOC100056825 | Cluster0002 |
| 15052048 | ENSECAT00000019674 // LOC100056842 // thymic stromal cotransporter homolog // --- // 10  | LOC100056842 | Cluster0002 |
| 15086464 | ENSECAT00000018792 // LOC100056861 // uncharacterized protein C1orf43 homolog // --- //  | LOC100056861 | Cluster0002 |
| 15017528 | XM_001504025 // LOC100056884 // wiskott-Aldrich syndrome protein family member 2-like /  | LOC100056884 | Cluster0002 |
| 14966515 | ENSECAT00000017502 // LOC100056960 // transcription elongation factor SPT4-like // ---   | LOC100056960 | Cluster0002 |
| 15090762 | XM_001490503 // LOC100056988 // myeloid cell nuclear differentiation antigen-like // --  | LOC100056988 | Cluster0002 |
| 15045260 | XM_001490976 // LOC100057010 // rRNA-processing protein FCF1 homolog // --- // 10005701  | LOC100057010 | Cluster0002 |
| 15018695 | ENSECAT00000018718 // LOC100057041 // DNA fragmentation factor subunit alpha-like // --  | LOC100057041 | Cluster0002 |
| 14991091 | XM_001503580 // LOC100057123 // 14-3-3 protein theta-like // --- // 100057123 /// ENSEC  | LOC100057123 | Cluster0002 |
| 15001394 | ENSECAT00000019622 // LOC100057124 // glycerol-3-phosphate dehydrogenase 1-like protein  | LOC100057124 | Cluster0002 |
| 14957907 | ENSECAT00000010590 // LOC100057193 // casein kinase I isoform delta-like // --- // 1000  | LOC100057193 | Cluster0002 |
| 15091154 | ENSECAT00000020867 // LOC100057221 // sugar transporter SWEET1-like // --- // 100057221  | LOC100057221 | Cluster0002 |
| 14972644 | XM_001490643 // LOC100057228 // olfactory receptor 8J3-like // --- // 100057228 /// ENS  | LOC100057228 | Cluster0002 |
| 15045306 | XM_001490655 // LOC100057247 // translation initiation factor eIF-2B subunit beta-like   | LOC100057247 | Cluster0002 |
| 15013580 | XM_001915284 // LOC100057287 // translocon-associated protein subunit gamma-like // ---  | LOC100057287 | Cluster0002 |
| 15124441 | XM_001916266 // LOC100057344 // derlin-1-like // --- // 100057344 /// ENSECAT0000002549  | LOC100057344 | Cluster0002 |

|          |                                                                                          |              |             |
|----------|------------------------------------------------------------------------------------------|--------------|-------------|
| 15086309 | XM_001498730 // LOC100057345 // secretory carrier-associated membrane protein 3-like //  | LOC100057345 | Cluster0002 |
| 15111015 | ENSECAT00000004374 // LOC100057430 // uncharacterized protein C19orf52-like // --- // 1  | LOC100057430 | Cluster0002 |
| 15062782 | ENSECAT000000025128 // LOC100057457 // Kruppel-like factor 6-like // --- // 100057457 /  | LOC100057457 | Cluster0002 |
| 14973802 | XM_001490817 // LOC100057483 // transcription factor p65-like // --- // 100057483 /// E  | LOC100057483 | Cluster0002 |
| 15013831 | XM_001915861 // LOC100057566 // polyhomeotic-like protein 3-like // --- // 100057566 //  | LOC100057566 | Cluster0002 |
| 14947591 | ENSECAT000000011324 // LOC100057596 // uncharacterized protein C15orf41-like // --- // 1 | LOC100057596 | Cluster0002 |
| 14973815 | XM_001494534 // LOC100057603 // cofilin-1-like // --- // 100057603 /// ENSECAT000000211  | LOC100057603 | Cluster0002 |
| 14992467 | ENSECAT000000014783 // LOC100057605 // deoxyguanosine kinase, mitochondrial-like // ---  | LOC100057605 | Cluster0002 |
| 15111040 | ENSECAT000000024627 // LOC100057627 // dynamin-2-like // --- // 100057627                | LOC100057627 | Cluster0002 |
| 15024815 | ENSECAT000000023912 // LOC100057635 // bridging integrator 3-like // --- // 100057635 // | LOC100057635 | Cluster0002 |
| 15017790 | XM_001504204 // LOC100057686 // hydroxymethylglutaryl-CoA lyase, mitochondrial-like //   | LOC100057686 | Cluster0002 |
| 15054285 | ENSECAT000000003259 // LOC100057691 // NADH dehydrogenase [ubiquinone] flavoprotein 3, m | LOC100057691 | Cluster0002 |
| 15133776 | ENSECAT000000020048 // LOC100057896 // isocitrate dehydrogenase [NAD] subunit gamma, mit | LOC100057896 | Cluster0002 |
| 14973847 | ENSECAT000000026110 // LOC100057911 // probable RNA-binding protein EIF1AD-like // --- / | LOC100057911 | Cluster0002 |
| 15090985 | ENSECAT000000014727 // LOC100057939 // apolipoprotein A-I-binding protein-like // --- // | LOC100057939 | Cluster0002 |
| 14939458 | XM_001503674 // LOC100057999 // transmembrane protein 85-like // --- // 100057999 /// E  | LOC100057999 | Cluster0002 |
| 14969830 | XM_001491132 // LOC100058004 // zinc transporter ZIP13-like // --- // 100058004 /// ENS  | LOC100058004 | Cluster0002 |
| 15119386 | XM_001489204 // LOC100058028 // proteasome assembly chaperone 2-like // --- // 10005802  | LOC100058028 | Cluster0002 |
| 14989013 | ENSECAT00000009766 // LOC100058052 // bclA-like protein 3-like // --- // 100058052 ///   | LOC100058052 | Cluster0002 |
| 14981473 | XM_001502076 // LOC100058092 // H/ACA ribonucleoprotein complex subunit 2-like // --- /  | LOC100058092 | Cluster0002 |
| 15013983 | ENSECAT000000013311 // LOC100058096 // zinc finger matrin-type protein 3-like // --- //  | LOC100058096 | Cluster0002 |
| 15023462 | XM_001504261 // LOC100058097 // complement C1q subcomponent subunit A-like // --- // 10  | LOC100058097 | Cluster0002 |
| 15030600 | ENSECAT000000024180 // LOC100058098 // patr class I histocompatibility antigen, A-126 al | LOC100058098 | Cluster0002 |
| 14999059 | XM_001493888 // LOC100058184 // probable protein BRICK1-like // --- // 100058184 /// EN  | LOC100058184 | Cluster0002 |
| 15114725 | XM_001491288 // LOC100058244 // protein phosphatase PTC7 homolog // --- // 100058244 //  | LOC100058244 | Cluster0002 |
| 15106245 | XM_001491320 // LOC100058299 // sphingosine 1-phosphate receptor 2-like // --- // 10005  | LOC100058299 | Cluster0002 |
| 15094009 | XM_001915148 // LOC100058331 // actin-related protein 2/3 complex subunit 2-like // ---  | LOC100058331 | Cluster0002 |
| 15057185 | XM_003364229 // LOC100058367 // RNA-binding protein with multiple splicing-like // ---   | LOC100058367 | Cluster0002 |
| 15057193 | XM_001495715 // LOC100058409 // dynactin subunit 6-like // --- // 100058409 /// ENSECAT  | LOC100058409 | Cluster0002 |
| 15080237 | XM_001488867 // LOC100058412 // dnaJ homolog subfamily C member 2-like // --- // 100058  | LOC100058412 | Cluster0002 |
| 15119399 | XM_001491395 // LOC100058421 // tubulin beta-5 chain-like // --- // 100058421 /// ENSEC  | LOC100058421 | Cluster0002 |
| 14981567 | XM_001502371 // LOC100058443 // vesicular integral-membrane protein VIP36-like // --- /  | LOC100058443 | Cluster0002 |
| 15117609 | XM_001497319 // LOC100058463 // RING finger protein 185-like // --- // 100058463 /// EN  | LOC100058463 | Cluster0002 |
| 15120901 | XM_001915132 // LOC100058465 // 28S ribosomal protein S28, mitochondrial-like // --- //  | LOC100058465 | Cluster0002 |
| 15111188 | XM_001491424 // LOC100058468 // UPF0515 protein C19orf66 homolog // --- // 100058468 //  | LOC100058468 | Cluster0002 |
| 15085717 | XM_001491425 // LOC100058470 // peroxisomal biogenesis factor 19-like // --- // 1000584  | LOC100058470 | Cluster0002 |
| 14999206 | ENSECAT000000022269 // LOC100058531 // myotubularin-related protein 14-like // --- // 10 | LOC100058531 | Cluster0002 |
| 15111419 | XM_001916685 // LOC100058546 // protein KIAA1731-like // --- // 100058546 /// ENSECAT00  | LOC100058546 | Cluster0002 |
| 14939579 | ENSECAT000000001230 // LOC100058565 // enhancer of rudimentary homolog // --- // 1000585 | LOC100058565 | Cluster0002 |
| 15094086 | XM_001491531 // LOC100058624 // cell differentiation protein RCD1 homolog // --- // 100  | LOC100058624 | Cluster0002 |
| 14947888 | XM_001505132 // LOC100058648 // transmembrane protein 55B-like // --- // 100058648 ///   | LOC100058648 | Cluster0002 |
| 15027656 | XM_001917690 // LOC100058658 // casein kinase II subunit beta-like // --- // 100058658   | LOC100058658 | Cluster0002 |
| 15114833 | XM_001496472 // LOC100058668 // 26S proteasome non-ATPase regulatory subunit 9-like //   | LOC100058668 | Cluster0002 |
| 15118724 | ENSECAT000000021600 // LOC100058709 // diablo homolog, mitochondrial-like // --- // 1000 | LOC100058709 | Cluster0002 |
| 14932781 | ENSECAT000000020131 // LOC100058723 // uncharacterized protein C10orf84-like // --- // 1 | LOC100058723 | Cluster0002 |
| 14973945 | ENSECAT000000024543 // LOC100058729 // RNA-binding protein 4B-like // --- // 100058729 / | LOC100058729 | Cluster0002 |
| 15091713 | ENSECAT000000012027 // LOC100058752 // pleckstrin homology domain-containing family O me | LOC100058752 | Cluster0002 |
| 14961924 | XM_001504075 // LOC100058771 // galectin-9C-like // --- // 100058771 /// XM_001504079 /  | LOC100058771 | Cluster0002 |
| 14998450 | XM_001491640 // LOC100058811 // glycogenin-1-like // --- // 100058811 /// ENSECAT000000  | LOC100058811 | Cluster0002 |
| 15091689 | XM_001489373 // LOC100058935 // 28S ribosomal protein S21, mitochondrial-like // --- //  | LOC100058935 | Cluster0002 |
| 15097534 | ENSECAT000000011075 // LOC100058940 // transmembrane protein 198-B-like // --- // 100058 | LOC100058940 | Cluster0002 |
| 15119428 | XM_001490037 // LOC100058979 // proteasome assembly chaperone 2-like // --- // 10005897  | LOC100058979 | Cluster0002 |
| 15051115 | XM_001917558 // LOC100059025 // arrestin domain-containing protein 1-like // --- // 100  | LOC100059025 | Cluster0002 |
| 14984667 | ENSECAT00000000976 // LOC100059037 // 60S ribosomal protein L26-like 1-like // --- // 1  | LOC100059037 | Cluster0002 |

|          |                                                                                           |              |             |
|----------|-------------------------------------------------------------------------------------------|--------------|-------------|
| 14970296 | XM_001501678 // LOC100059110 // transmembrane protein 109-like // --- // 100059110 ///    | LOC100059110 | Cluster0002 |
| 15063976 | XM_001915288 // LOC100059123 // nucleotide-binding oligomerization domain-containing pr   | LOC100059123 | Cluster0002 |
| 15118895 | ENSECAT000000022871 // LOC100059129 // translation initiation factor eIF-2B subunit alph  | LOC100059129 | Cluster0002 |
| 15120912 | ENSECAT000000022041 // LOC100059131 // interleukin-7-like // --- // 100059131 /// XM_001  | LOC100059131 | Cluster0002 |
| 15070936 | ENSECAT000000026405 // LOC100059167 // 39S ribosomal protein L1, mitochondrial-like // -  | LOC100059167 | Cluster0002 |
| 14991577 | ENSECAT000000025843 // LOC100059235 // 60S ribosomal protein L31-like // --- // 10005923  | LOC100059235 | Cluster0002 |
| 15043389 | XM_001917215 // LOC100059240 // GTP:AMP phosphotransferase, mitochondrial-like // --- /   | LOC100059240 | Cluster0002 |
| 14967386 | XM_001504154 // LOC100059307 // stromal cell-derived factor 2-like // --- // 100059307    | LOC100059307 | Cluster0002 |
| 15098813 | XM_001491978 // LOC100059355 // aspartyl aminopeptidase-like // --- // 100059355 /// EN   | LOC100059355 | Cluster0002 |
| 14977843 | ENSECAT000000007813 // LOC100059364 // cleavage and polyadenylation specificity factor s  | LOC100059364 | Cluster0002 |
| 15130484 | ENSECAT000000014632 // LOC100059369 // emerin-like // --- // 100059369                    | LOC100059369 | Cluster0002 |
| 14947996 | XM_001505161 // LOC100059376 // ras-related protein Rab-2B-like // --- // 100059376 ///   | LOC100059376 | Cluster0002 |
| 14974563 | ENSECAT000000002287 // LOC100059401 // ATP synthase subunit f, mitochondrial-like // ---  | LOC100059401 | Cluster0002 |
| 14974040 | ENSECAT000000019733 // LOC100059453 // membrane-associated phosphatidylinositol transfer  | LOC100059453 | Cluster0002 |
| 15087392 | XM_001500064 // LOC100059469 // GTPase NRas-like // --- // 100059469 /// ENSECAT0000001   | LOC100059469 | Cluster0002 |
| 15094270 | XM_001492055 // LOC100059471 // mannose-1-phosphate guanyltransferase alpha-like // ---   | LOC100059471 | Cluster0002 |
| 14967411 | ENSECAT000000012433 // LOC100059494 // uncharacterized protein C17orf63-like // --- // 1  | LOC100059494 | Cluster0002 |
| 15030901 | ENSECAT000000015111 // LOC100059501 // 1-acyl-sn-glycerol-3-phosphate acyltransferase al  | LOC100059501 | Cluster0002 |
| 15075675 | ENSECAT000000009872 // LOC100059508 // dynein light chain Tctex-type 1-like // --- // 10  | LOC100059508 | Cluster0002 |
| 14964498 | XM_001495435 // LOC100059530 // SAP30-binding protein-like // --- // 100059530 /// ENSE   | LOC100059530 | Cluster0002 |
| 14962064 | ENSECAT000000014162 // LOC100059531 // GTPase Era, mitochondrial-like // --- // 10005953  | LOC100059531 | Cluster0002 |
| 14971490 | XM_001492090 // LOC100059533 // glutathione S-transferase P-like // --- // 100059533 //   | LOC100059533 | Cluster0002 |
| 14971500 | ENSECAT000000022916 // LOC100059569 // NADH dehydrogenase [ubiquinone] flavoprotein 1, m  | LOC100059569 | Cluster0002 |
| 15018880 | ENSECAT000000025347 // LOC100059575 // cytosolic acyl coenzyme A thioester hydrolase-lik  | LOC100059575 | Cluster0002 |
| 14974861 | ENSECAT000000012678 // LOC100059590 // putative ribosomal RNA methyltransferase 2-like /  | LOC100059590 | Cluster0002 |
| 14978598 | XM_001504462 // LOC100059592 // mitochondrial fission 1 protein-like // --- // 10005959   | LOC100059592 | Cluster0002 |
| 14949449 | XM_001915953 // LOC100059603 // transmembrane protein 147-like // --- // 100059603 ///    | LOC100059603 | Cluster0002 |
| 14978230 | ENSECAT000000009517 // LOC100059629 // 7,8-dihydro-8-oxoguanine triphosphatase-like // -  | LOC100059629 | Cluster0002 |
| 14978630 | XM_001504472 // LOC100059659 // probable alpha-ketoglutarate-dependent dioxygenase ABH4   | LOC100059659 | Cluster0002 |
| 14978634 | XM_001504471 // LOC100059695 // DNA-directed RNA polymerase II subunit RPB11-like // --   | LOC100059695 | Cluster0002 |
| 15126614 | ENSECAT000000010657 // LOC100059698 // small glutamine-rich tetratricopeptide repeat-con  | LOC100059698 | Cluster0002 |
| 15114791 | ENSECAT000000013459 // LOC100059726 // calcium release-activated calcium channel protein  | LOC100059726 | Cluster0002 |
| 14975442 | XM_001504476 // LOC100059731 // 14-3-3 protein gamma-like // --- // 100059731 /// ENSEC   | LOC100059731 | Cluster0002 |
| 14978696 | XM_001504478 // LOC100059763 // heat shock protein beta-1-like // --- // 100059763 ///    | LOC100059763 | Cluster0002 |
| 14962186 | XM_001504253 // LOC100059771 // Golgi SNAP receptor complex member 1-like // --- // 100   | LOC100059771 | Cluster0002 |
| 14941987 | ENSECAT0000000025914 // LOC100059833 // outcome predictor in acute leukemia 1-like // --- | LOC100059833 | Cluster0002 |
| 14936651 | XM_001492287 // LOC100059835 // pro-cathepsin H-like // --- // 100059835 /// ENSECAT000   | LOC100059835 | Cluster0002 |
| 15102842 | XM_001492303 // LOC100059858 // prostaglandin E synthase 3-like // --- // 100059858 ///   | LOC100059858 | Cluster0002 |
| 15111234 | XM_001492338 // LOC100059920 // zinc finger protein 426-like // --- // 100059920 /// EN   | LOC100059920 | Cluster0002 |
| 15095644 | XM_001496881 // LOC100059941 // COP9 signalosome complex subunit 7a-like // --- // 1000   | LOC100059941 | Cluster0002 |
| 15091467 | XM_003365031 // LOC100059946 // tuftelin-like // --- // 100059946 /// ENSECAT00000001160  | LOC100059946 | Cluster0002 |
| 14944137 | ENSECAT0000000025059 // LOC100059958 // cancer-related nucleoside-triphosphatase-like //  | LOC100059958 | Cluster0002 |
| 14933244 | XM_001498878 // LOC100059986 // CUE domain-containing protein 2-like // --- // 10005998   | LOC100059986 | Cluster0002 |
| 15087182 | XM_001501227 // LOC100059997 // vesicle-trafficking protein SEC22b-like // --- // 10005   | LOC100059997 | Cluster0002 |
| 14974815 | ENSECAT0000000021390 // LOC100060005 // guanine nucleotide-binding protein subunit alpha- | LOC100060005 | Cluster0002 |
| 15046870 | ENSECAT000000011872 // LOC100060062 // dehydrogenase/reductase SDR family member 7-like   | LOC100060062 | Cluster0002 |
| 14989117 | XM_001492476 // LOC100060120 // protein TEX261-like // --- // 100060120 /// ENSECAT0000   | LOC100060120 | Cluster0002 |
| 14962339 | ENSECAT000000005331 // LOC100060145 // ovarian cancer-associated gene 2 protein homolog   | LOC100060145 | Cluster0002 |
| 15008689 | ENSECAT000000015334 // LOC100060199 // ras-related protein Ral-B-like // --- // 10006019  | LOC100060199 | Cluster0002 |
| 14973302 | XM_001502760 // LOC100060210 // UBX domain-containing protein 1-like // --- // 10006021   | LOC100060210 | Cluster0002 |
| 15089479 | ENSECAT000000026316 // LOC100060224 // phosphatidylinositol N-acetylglucosaminyltransfer  | LOC100060224 | Cluster0002 |
| 15076135 | XR_036390 // LOC100060323 // proteasome subunit beta type-2-like // --- // 100060323 ///  | LOC100060323 | Cluster0002 |
| 15024938 | XM_001915185 // LOC100060341 // tripartite motif-containing protein 35-like // --- // 1   | LOC100060341 | Cluster0002 |
| 15127342 | ENSECAT000000018712 // LOC100060382 // eukaryotic translation initiation factor 2 subuni  | LOC100060382 | Cluster0002 |

|          |                                                                                          |              |             |
|----------|------------------------------------------------------------------------------------------|--------------|-------------|
| 15021368 | XM_001915662 // LOC100060394 // tetratricopeptide repeat protein 4-like // --- // 10006  | LOC100060394 | Cluster0002 |
| 15084370 | XM_001492668 // LOC100060398 // protein osteopotentia homolog // --- // 100060398 /// E  | LOC100060398 | Cluster0002 |
| 15024477 | XM_001492683 // LOC100060427 // DNA fragmentation factor subunit beta-like // --- // 10  | LOC100060427 | Cluster0002 |
| 15108549 | XM_001494016 // LOC100060448 // mitochondrial import inner membrane translocase subunit  | LOC100060448 | Cluster0002 |
| 14933390 | XM_001500281 // LOC100060451 // NADH dehydrogenase [ubiquinone] 1 beta subcomplex subun  | LOC100060451 | Cluster0002 |
| 14962444 | XM_001504725 // LOC100060628 // transmembrane protein 93-like // --- // 100060628 /// E  | LOC100060628 | Cluster0002 |
| 14975753 | XM_001499574 // LOC100060727 // coiled-coil-helix-coiled-coil-helix domain-containing p  | LOC100060727 | Cluster0002 |
| 15100216 | XM_001498661 // LOC100060780 // adaptin ear-binding coat-associated protein 1-like // -  | LOC100060780 | Cluster0002 |
| 15103940 | XM_001498213 // LOC100060851 // 40S ribosomal protein S28-like // --- // 100060851 ///   | LOC100060851 | Cluster0002 |
| 14978914 | XM_001499915 // LOC100060879 // UPF0458 protein C7orf42-like // --- // 100060879 /// EN  | LOC100060879 | Cluster0002 |
| 15027919 | XM_001493006 // LOC100060885 // proteasome subunit beta type-9-like // --- // 100060885  | LOC100060885 | Cluster0002 |
| 15120939 | XM_001493018 // LOC100060902 // transcription elongation factor B polypeptide 1-like //  | LOC100060902 | Cluster0002 |
| 14987821 | ENSECAT00000020846 // LOC100060911 // ADP-ribosylation factor 1-like // --- // 10006091  | LOC100060911 | Cluster0002 |
| 14933622 | XM_001501347 // LOC100060949 // arginine vasopressin-induced protein 1-like // --- // 1  | LOC100060949 | Cluster0002 |
| 14944212 | XM_001494310 // LOC100060950 // protein ARV1-like // --- // 100060950 /// ENSECAT000000  | LOC100060950 | Cluster0002 |
| 14992679 | XM_001490697 // LOC100060958 // u4/U6.U5 small nuclear ribonucleoprotein 27 kDa protein  | LOC100060958 | Cluster0002 |
| 14972141 | ENSECAT00000006602 // LOC100060978 // probable methylthioribulose-1-phosphate dehydrata  | LOC100060978 | Cluster0002 |
| 14984243 | ENSECAT00000004417 // LOC100060980 // histone H2B type 1-L-like // --- // 100060980      | LOC100060980 | Cluster0002 |
| 14964777 | ENSECAT00000024658 // LOC100060986 // protein tweety homolog 2-like // --- // 100060986  | LOC100060986 | Cluster0002 |
| 15109189 | ENSECAT00000014032 // LOC100061007 // protein CWC15 homolog // --- // 100061007 /// XM_  | LOC100061007 | Cluster0002 |
| 14962585 | XM_001504739 // LOC100061027 // derlin-2-like // --- // 100061027 /// ENSECAT0000001050  | LOC100061027 | Cluster0002 |
| 14968189 | ENSECAT00000012405 // LOC100061089 // RPA-interacting protein-like // --- // 100061089   | LOC100061089 | Cluster0002 |
| 14975453 | XM_001493164 // LOC100061105 // transmembrane protein 120A-like // --- // 100061105 ///  | LOC100061105 | Cluster0002 |
| 14945741 | XM_001493197 // LOC100061150 // tetraspanin-3-like // --- // 100061150 /// ENSECAT000000 | LOC100061150 | Cluster0002 |
| 15131860 | ENSECAT00000005799 // LOC100061180 // testis-specific Y-encoded-like protein 2-like //   | LOC100061180 | Cluster0002 |
| 14978980 | ENSECAT00000026699 // LOC100061188 // protein NipSnap homolog 2-like // --- // 10006118  | LOC100061188 | Cluster0002 |
| 15127861 | ENSECAT00000025939 // LOC100061212 // serine/threonine-protein kinase A-Raf-like // ---  | LOC100061212 | Cluster0002 |
| 14968243 | XM_001504749 // LOC100061251 // e3 ubiquitin-protein ligase RNF167-like // --- // 10006  | LOC100061251 | Cluster0002 |
| 14984254 | XM_001494754 // LOC100061285 // 39S ribosomal protein L55, mitochondrial-like // --- //  | LOC100061285 | Cluster0002 |
| 15039160 | XM_001489907 // LOC100061304 // n-alpha-acetyltransferase 20, NatB catalytic subunit-li  | LOC100061304 | Cluster0002 |
| 15071656 | ENSECAT00000025177 // LOC100061309 // SLAIN motif-containing protein 2-like // --- // 1  | LOC100061309 | Cluster0002 |
| 15111622 | XM_001493368 // LOC100061424 // transmembrane protein 126B-like // --- // 100061424 ///  | LOC100061424 | Cluster0002 |
| 14962705 | XM_001504756 // LOC100061442 // c-X-C motif chemokine 16-like // --- // 100061442 /// E  | LOC100061442 | Cluster0002 |
| 15027958 | XM_001493382 // LOC100061452 // e3 ubiquitin-protein ligase RING1-like // --- // 100061  | LOC100061452 | Cluster0002 |
| 15075298 | XM_001493402 // LOC100061484 // mitochondrial dimethyladenosine transferase 1-like // -  | LOC100061484 | Cluster0002 |
| 14933903 | XM_001502179 // LOC100061542 // cytochrome P450 2C19-like // --- // 100061542 /// ENSEC  | LOC100061542 | Cluster0002 |
| 15092420 | XM_003365077 // LOC100061557 // cytochrome b561 domain-containing protein 1-like // ---  | LOC100061557 | Cluster0002 |
| 15100256 | ENSECAT00000023553 // LOC100061559 // cation-dependent mannose-6-phosphate receptor-lik  | LOC100061559 | Cluster0002 |
| 14945777 | ENSECAT00000015570 // LOC100061677 // COMM domain-containing protein 4-like // --- // 1  | LOC100061677 | Cluster0002 |
| 14978946 | ENSECAT00000011475 // LOC100061681 // DNA-directed RNA polymerase III subunit RPC9-like  | LOC100061681 | Cluster0002 |
| 14978770 | ENSECAT00000016225 // LOC100061703 // b-cell CLL/lymphoma 7 protein family member B-lik  | LOC100061703 | Cluster0002 |
| 14968442 | ENSECAT00000011216 // LOC100061712 // G protein pathway suppressor 2-like // --- // 100  | LOC100061712 | Cluster0002 |
| 14996235 | XM_001493584 // LOC100061750 // nitrogen permease regulator 2-like protein-like // ---   | LOC100061750 | Cluster0002 |
| 15031178 | ENSECAT00000025691 // LOC100061755 // putative Bcl-2 homologous antagonist/killer 2-lik  | LOC100061755 | Cluster0002 |
| 15102165 | ENSECAT00000019712 // LOC100061764 // keratin, type II cytoskeletal 1-like // --- // 10  | LOC100061764 | Cluster0002 |
| 15109637 | XM_001501779 // LOC100061921 // alpha-crystallin B chain-like // --- // 100061921 /// E  | LOC100061921 | Cluster0002 |
| 15092334 | XM_001493712 // LOC100061953 // protein FAM40A-like // --- // 100061953 /// ENSECAT0000  | LOC100061953 | Cluster0002 |
| 14991723 | XM_001493723 // LOC100061973 // cytochrome c oxidase subunit 5B, mitochondrial-like //   | LOC100061973 | Cluster0002 |
| 14996282 | XM_001496249 // LOC100061975 // interferon-related developmental regulator 2-like // --  | LOC100061975 | Cluster0002 |
| 14936941 | XM_001493806 // LOC100062111 // secretory carrier-associated membrane protein 2-like //  | LOC100062111 | Cluster0002 |
| 15097292 | XM_001504512 // LOC100062123 // UPF0160 protein MYG1, mitochondrial-like // --- // 1000  | LOC100062123 | Cluster0002 |
| 15130624 | ENSECAT00000002112 // LOC100062203 // prefoldin subunit 3-like // --- // 100062203 ///   | LOC100062203 | Cluster0002 |
| 15042499 | ENSECAT00000010602 // LOC100062234 // semaphorin-4D-like // --- // 100062234             | LOC100062234 | Cluster0002 |
| 14968547 | ENSECAT00000011785 // LOC100062246 // trafficking protein particle complex subunit 1-li  | LOC100062246 | Cluster0002 |

|          |                                                                                          |              |             |
|----------|------------------------------------------------------------------------------------------|--------------|-------------|
| 15115331 | XM_001493904 // LOC100062278 // tRNA pseudouridine synthase A, mitochondrial-like // --  | LOC100062278 | Cluster0002 |
| 14978005 | ENSECAT00000007741 // LOC100062309 // eukaryotic translation initiation factor 2-alpha   | LOC100062309 | Cluster0002 |
| 14955952 | XM_003362313 // LOC100062322 // zinc finger protein 256-like // --- // 100062322 // EN   | LOC100062322 | Cluster0002 |
| 15031223 | ENSECAT00000005973 // LOC100062360 // 40S ribosomal protein S10-like // --- // 10006236  | LOC100062360 | Cluster0002 |
| 15089686 | ENSECAT000000011389 // LOC100062369 // uncharacterized LOC100062369 // --- // 100062369  | LOC100062369 | Cluster0002 |
| 15100438 | XM_001493960 // LOC100062370 // oxidized low-density lipoprotein receptor 1-like // ---  | LOC100062370 | Cluster0002 |
| 14970396 | XM_001502117 // LOC100062392 // succinate dehydrogenase assembly factor 2, mitochondria  | LOC100062392 | Cluster0002 |
| 15064321 | ENSECAT000000008347 // LOC100062499 // ubiquinone biosynthesis protein COQ9, mitochondri | LOC100062499 | Cluster0002 |
| 15004807 | XM_001495632 // LOC100062531 // protein FAM48A-like // --- // 100062531 // ENSECAT0000   | LOC100062531 | Cluster0002 |
| 15047013 | XM_003364029 // LOC100062536 // protein max-like // --- // 100062536 // XM_001494066 /   | LOC100062536 | Cluster0002 |
| 14963225 | XM_001504818 // LOC100062561 // ran guanine nucleotide release factor-like // --- // 10  | LOC100062561 | Cluster0002 |
| 15003002 | XM_001495546 // LOC100062567 // exosome complex component RRP43-like // --- // 10006256  | LOC100062567 | Cluster0002 |
| 14973119 | XM_001494112 // LOC100062603 // UPF0197 transmembrane protein C11orf10 homolog // --- /  | LOC100062603 | Cluster0002 |
| 14942763 | ENSECAT000000017042 // LOC100062658 // polycomb group RING finger protein 5-like // ---  | LOC100062658 | Cluster0002 |
| 15042928 | XM_001494169 // LOC100062680 // transducin-like enhancer protein 4-like // --- // 10006  | LOC100062680 | Cluster0002 |
| 15020509 | ENSECAT000000029039 // LOC100062717 // sodium/bile acid cotransporter 7-like // --- // 1 | LOC100062717 | Cluster0002 |
| 15045606 | ENSECAT000000009414 // LOC100062752 // calmodulin-like // --- // 100062752               | LOC100062752 | Cluster0002 |
| 14973150 | ENSECAT000000006983 // LOC100062780 // guanine nucleotide exchange factor for Rab-3A-lik | LOC100062780 | Cluster0002 |
| 14985972 | XM_001504379 // LOC100062781 // UPF0461 protein C5orf24-like // --- // 100062781 // EN   | LOC100062781 | Cluster0002 |
| 14951475 | XM_001917999 // LOC100062799 // electron transfer flavoprotein subunit beta-like // ---  | LOC100062799 | Cluster0002 |
| 1520562  | ENSECAT000000026243 // LOC100062837 // anaphase-promoting complex subunit 10-like // --- | LOC100062837 | Cluster0002 |
| 15117517 | XM_001494300 // LOC100062878 // 14-3-3 protein eta-like // --- // 100062878 // ENSECAT   | LOC100062878 | Cluster0002 |
| 15030204 | XM_001494338 // LOC100062934 // histone H2B type 2-F-like // --- // 100062934 // ENSEC   | LOC100062934 | Cluster0002 |
| 15033337 | ENSECAT000000015662 // LOC100062980 // ADP-ribosylation factor-like protein 15-like // - | LOC100062980 | Cluster0002 |
| 15042967 | ENSECAT000000016395 // LOC100063011 // uncharacterized LOC100063011 // --- // 100063011  | LOC100063011 | Cluster0002 |
| 15109929 | ENSECAT000000015047 // LOC100063051 // intraflagellar transport protein 46 homolog // -- | LOC100063051 | Cluster0002 |
| 15084585 | ENSECAT000000019110 // LOC100063083 // torsin-3A-like // --- // 100063083 // XM_0014944  | LOC100063083 | Cluster0002 |
| 15035449 | XM_001494494 // LOC100063168 // NADH dehydrogenase [ubiquinone] iron-sulfur protein 4,   | LOC100063168 | Cluster0002 |
| 15111700 | ENSECAT000000018577 // LOC100063181 // aquaporin-11-like // --- // 100063181 // XM_0014  | LOC100063181 | Cluster0002 |
| 15105800 | XM_001504875 // LOC100063222 // syntaxin-10-like // --- // 100063222 // ENSECAT00000001  | LOC100063222 | Cluster0002 |
| 15125274 | ENSECAT000000006916 // LOC100063246 // vacuolar protein sorting-associated protein 28 ho | LOC100063246 | Cluster0002 |
| 14975790 | XM_001500509 // LOC100063252 // apoptosis-associated speck-like protein containing a CA  | LOC100063252 | Cluster0002 |
| 15110015 | XM_001503132 // LOC100063303 // UDP-N-acetylglucosamine--dolichyl-phosphate N-acetylglu  | LOC100063303 | Cluster0002 |
| 15086375 | ENSECAT000000007364 // LOC100063346 // dolichol-phosphate mannosyltransferase subunit 3- | LOC100063346 | Cluster0002 |
| 14975814 | XM_001500789 // LOC100063360 // vitamin K epoxide reductase complex subunit 1-like // -  | LOC100063360 | Cluster0002 |
| 15086369 | ENSECAT000000020676 // LOC100063378 // keratinocyte-associated protein 2-like // --- //  | LOC100063378 | Cluster0002 |
| 15091132 | XM_001494688 // LOC100063479 // metaxin-1-like // --- // 100063479 // ENSECAT0000000077  | LOC100063479 | Cluster0002 |
| 14986255 | ENSECAT000000026576 // LOC100063560 // protein PRRC1-like // --- // 100063560 // XM_001  | LOC100063560 | Cluster0002 |
| 15042173 | ENSECAT000000005636 // LOC100063565 // ras-related GTP-binding protein A-like // --- //  | LOC100063565 | Cluster0002 |
| 15111763 | ENSECAT000000029021 // LOC100063572 // alkaline ceramidase 3-like // --- // 100063572 // | LOC100063572 | Cluster0002 |
| 15096034 | XM_001501469 // LOC100063606 // retinoic acid-induced protein 3-like // --- // 10006360  | LOC100063606 | Cluster0002 |
| 15133741 | ENSECAT000000000695 // LOC100063613 // centrin-2-like // --- // 100063613 // XM_0014947  | LOC100063613 | Cluster0002 |
| 15041410 | XM_001494977 // LOC100063910 // fructose-1,6-bisphosphatase 1-like // --- // 100063910   | LOC100063910 | Cluster0002 |
| 14970574 | XM_001495003 // LOC100063952 // transmembrane protein 179B-like // --- // 100063952 //   | LOC100063952 | Cluster0002 |
| 14973343 | XM_001495026 // LOC100063983 // transmembrane protein 223-like // --- // 100063983 //    | LOC100063983 | Cluster0002 |
| 15001610 | ENSECAT000000026211 // LOC100063989 // ELL-associated factor 1-like // --- // 100063989  | LOC100063989 | Cluster0002 |
| 15019080 | ENSECAT000000010036 // LOC100064074 // peroxisome biogenesis factor 10-like // --- // 10 | LOC100064074 | Cluster0002 |
| 15051507 | XM_001495095 // LOC100064095 // tripartite motif-containing protein 14-like // --- // 1  | LOC100064095 | Cluster0002 |
| 15083565 | ENSECAT000000022109 // LOC100064100 // transmembrane and ubiquitin-like domain-containin | LOC100064100 | Cluster0002 |
| 15086128 | XM_001495102 // LOC100064105 // lysosomal protein NCU-G1-like // --- // 100064105 // E   | LOC100064105 | Cluster0002 |
| 15028300 | ENSECAT000000025946 // LOC100064123 // uncharacterized protein C6orf89 homolog // --- // | LOC100064123 | Cluster0002 |
| 15102337 | ENSECAT000000024651 // LOC100064131 // ATP synthase lipid-binding protein, mitochondrial | LOC100064131 | Cluster0002 |
| 14959667 | XM_001495148 // LOC100064169 // dephospho-CoA kinase domain-containing protein-like //   | LOC100064169 | Cluster0002 |
| 15051495 | ENSECAT000000011518 // LOC100064200 // uncharacterized LOC100064200 // --- // 100064200  | LOC100064200 | Cluster0002 |

|          |                                                                                          |              |             |
|----------|------------------------------------------------------------------------------------------|--------------|-------------|
| 14949911 | XM_001497212 // LOC100064307 // eukaryotic translation initiation factor 3 subunit K-li  | LOC100064307 | Cluster0002 |
| 15105373 | XM_001505079 // LOC100064327 // etoposide-induced protein 2.4 homolog // --- // 1000643  | LOC100064327 | Cluster0002 |
| 15105916 | ENSECAT000000023387 // LOC100064330 // UPF0139 membrane protein C19orf56 homolog // ---  | LOC100064330 | Cluster0002 |
| 15122935 | ENSECAT00000001401 // LOC100064332 // COMM domain-containing protein 5-like // --- // 1  | LOC100064332 | Cluster0002 |
| 14949941 | ENSECAT00000015087 // LOC100064368 // NF-kappa-B inhibitor beta-like // --- // 10006436  | LOC100064368 | Cluster0002 |
| 14949948 | XM_001497611 // LOC100064399 // 28S ribosomal protein S12, mitochondrial-like // --- //  | LOC100064399 | Cluster0002 |
| 14954018 | XM_001497889 // LOC100064427 // glia maturation factor gamma-like // --- // 100064427 /  | LOC100064427 | Cluster0002 |
| 15083640 | XM_001495351 // LOC100064440 // GTP-binding protein Rheb-like // --- // 100064440 /// E  | LOC100064440 | Cluster0002 |
| 15021233 | ENSECAT00000011363 // LOC100064467 // integrator complex subunit 12-like // --- // 1000  | LOC100064467 | Cluster0002 |
| 14959736 | ENSECAT00000019216 // LOC100064544 // G patch domain-containing protein 8-like // --- /  | LOC100064544 | Cluster0002 |
| 15097379 | XM_001504569 // LOC100064590 // coatomer subunit zeta-1-like // --- // 100064590 /// EN  | LOC100064590 | Cluster0002 |
| 14975774 | ENSECAT00000011574 // LOC100064608 // UPF0420 protein C16orf58 homolog // --- // 100064  | LOC100064608 | Cluster0002 |
| 15096349 | ENSECAT00000017757 // LOC100064619 // FGFR1 oncogene partner 2 homolog // --- // 100064  | LOC100064619 | Cluster0002 |
| 15125524 | XM_001495522 // LOC100064692 // rab-like protein 2A-like // --- // 100064692 /// ENSECA  | LOC100064692 | Cluster0002 |
| 14965438 | XM_001495576 // LOC100064778 // transmembrane and ubiquitin-like domain-containing prot  | LOC100064778 | Cluster0002 |
| 15088485 | ENSECAT00000020720 // LOC100064813 // guanine nucleotide-binding protein G(I)/G(S)/G(O)  | LOC100064813 | Cluster0002 |
| 15110598 | XM_001505113 // LOC100064816 // thymocyte nuclear protein 1-like // --- // 100064816 //  | LOC100064816 | Cluster0002 |
| 15002913 | ENSECAT00000008327 // LOC100064836 // klotho-like // --- // 100064836 /// XM_001495612   | LOC100064836 | Cluster0002 |
| 15009997 | ENSECAT00000007189 // LOC100064837 // corepressor interacting with RBPJ 1-like // --- /  | LOC100064837 | Cluster0002 |
| 15074810 | XM_001495619 // LOC100064841 // guanine nucleotide exchange factor MSS4-like // --- //   | LOC100064841 | Cluster0002 |
| 14950227 | ENSECAT00000001571 // LOC100064859 // egl nine homolog 2-like // --- // 100064859 /// X  | LOC100064859 | Cluster0002 |
| 14956026 | XM_001495629 // LOC100064860 // charged multivesicular body protein 2a-like // --- // 1  | LOC100064860 | Cluster0002 |
| 15028393 | ENSECAT00000018261 // LOC100064913 // AN1-type zinc finger protein 3-like // --- // 100  | LOC100064913 | Cluster0002 |
| 15076905 | ENSECAT000000021345 // LOC100064918 // ubiquitin-conjugating enzyme E2 D4-like // --- // | LOC100064918 | Cluster0002 |
| 14954236 | ENSECAT00000026031 // LOC100064997 // exosome complex component RRP46-like // --- // 10  | LOC100064997 | Cluster0002 |
| 14954245 | XM_001500372 // LOC100065058 // ATP synthase subunit s-like protein-like // --- // 1000  | LOC100065058 | Cluster0002 |
| 15079026 | ENSECAT00000003310 // LOC100065089 // transmembrane protein 140-like // --- // 10006508  | LOC100065089 | Cluster0002 |
| 15091776 | XM_001499277 // LOC100065113 // DNA-directed RNA polymerase III subunit RPC3-like // --  | LOC100065113 | Cluster0002 |
| 14998078 | ENSECAT00000013925 // LOC100065124 // phakinin-like // --- // 100065124 /// XM_00149581  | LOC100065124 | Cluster0002 |
| 15122776 | XM_001495843 // LOC100065171 // repressor of RNA polymerase III transcription MAF1 homo  | LOC100065171 | Cluster0002 |
| 15031437 | ENSECAT00000020970 // LOC100065189 // lactoylglutathione lyase-like // --- // 100065189  | LOC100065189 | Cluster0002 |
| 15080829 | XM_001915794 // LOC100065195 // transmembrane emp24 domain-containing protein 4-like //  | LOC100065195 | Cluster0002 |
| 15087064 | ENSECAT00000002893 // LOC100065233 // peroxisomal membrane protein 11B-like // --- // 1  | LOC100065233 | Cluster0002 |
| 15131927 | ENSECAT00000019208 // LOC100065318 // zinc finger C4H2 domain-containing protein-like /  | LOC100065318 | Cluster0002 |
| 14937278 | ENSECAT00000018015 // LOC100065359 // ceroid-lipofuscinosis neuronal protein 6 homolog   | LOC100065359 | Cluster0002 |
| 15042284 | ENSECAT00000015135 // LOC100065392 // s-methyl-5 -thioadenosine phosphorylase-like // -  | LOC100065392 | Cluster0002 |
| 15123461 | XM_001496022 // LOC100065448 // YTH domain family protein 3-like // --- // 100065448 //  | LOC100065448 | Cluster0002 |
| 14975875 | XM_001496047 // LOC100065483 // zinc finger protein 764-like // --- // 100065483 /// EN  | LOC100065483 | Cluster0002 |
| 15125086 | XM_003365638 // LOC100065550 // poly(U)-binding-splicing factor PUF60-like // --- // 10  | LOC100065550 | Cluster0002 |
| 14977498 | XM_001497974 // LOC100065572 // 40S ribosomal protein S2-like // --- // 100065572 /// E  | LOC100065572 | Cluster0002 |
| 14954530 | XM_001502481 // LOC100065619 // trafficking protein particle complex subunit 6A-like //  | LOC100065619 | Cluster0002 |
| 14965512 | XM_001491967 // LOC100065621 // transmembrane protein 106A-like // --- // 100065621 ///  | LOC100065621 | Cluster0002 |
| 14954569 | XM_001502594 // LOC100065660 // DNA excision repair protein ERCC-1-like // --- // 10006  | LOC100065660 | Cluster0002 |
| 14987501 | XM_001504690 // LOC100065663 // transcription factor BTF3-like // --- // 100065663 ///   | LOC100065663 | Cluster0002 |
| 14977385 | XM_001498749 // LOC100065738 // RNA-binding protein with serine-rich domain 1-like // -  | LOC100065738 | Cluster0002 |
| 14956518 | XM_001503761 // LOC100065742 // LYR motif-containing protein 2-like // --- // 100065742  | LOC100065742 | Cluster0002 |
| 14954698 | XM_001502832 // LOC100065786 // 40S ribosomal protein S17-like // --- // 100065786 ///   | LOC100065786 | Cluster0002 |
| 15045822 | XM_001917419 // LOC100065822 // glutaredoxin-related protein 5, mitochondrial-like // -  | LOC100065822 | Cluster0002 |
| 15021812 | XM_001496761 // LOC100065845 // 40S ribosomal protein S8-like // --- // 100065845 /// E  | LOC100065845 | Cluster0002 |
| 14979335 | ENSECAT00000012705 // LOC100065899 // CDP-diacylglycerol--inositol 3-phosphatidytransf   | LOC100065899 | Cluster0002 |
| 15016465 | ENSECAT00000026685 // LOC100065903 // transmembrane protein 53-like // --- // 100065903  | LOC100065903 | Cluster0002 |
| 14980449 | ENSECAT00000021946 // LOC100065966 // n-acetyltransferase 15-like // --- // 100065966 /  | LOC100065966 | Cluster0002 |
| 14979358 | XM_001496402 // LOC100065972 // BTB/POZ domain-containing adapter for CUL3-mediated Rho  | LOC100065972 | Cluster0002 |
| 15069257 | ENSECAT00000007216 // LOC100066008 // tubulin polymerization-promoting protein family m  | LOC100066008 | Cluster0002 |

|          |                                                                                          |              |             |
|----------|------------------------------------------------------------------------------------------|--------------|-------------|
| 15093242 | XM_001496470 // LOC100066063 // interferon-induced protein 44-like // --- // 100066063   | LOC100066063 | Cluster0002 |
| 14954850 | XM_001503216 // LOC100066095 // alpha-soluble NSF attachment protein-like // --- // 100  | LOC100066095 | Cluster0002 |
| 15107170 | ENSECAT00000022428 // LOC100066106 // protein HSPC020 homolog // --- // 100066106 /// X  | LOC100066106 | Cluster0002 |
| 14980398 | XM_001502330 // LOC100066114 // heme oxygenase 2-like // --- // 100066114 /// ENSECAT00  | LOC100066114 | Cluster0002 |
| 14956757 | ENSECAT00000026298 // LOC100066119 // cyclin-C-like // --- // 100066119 /// XM_00150389  | LOC100066119 | Cluster0002 |
| 15069286 | XM_001915863 // LOC100066184 // adrenocortical dysplasia protein homolog // --- // 1000  | LOC100066184 | Cluster0002 |
| 15122687 | XM_001496550 // LOC100066193 // lymphocyte antigen 6E-like // --- // 100066193 /// ENSE  | LOC100066193 | Cluster0002 |
| 15048663 | XM_001504273 // LOC100066293 // RNA (guanine-9)-methyltransferase domain-containing pr   | LOC100066293 | Cluster0002 |
| 15112101 | XM_001496655 // LOC100066358 // rho-related GTP-binding protein RhoG-like // --- // 100  | LOC100066358 | Cluster0002 |
| 15024680 | XM_001496658 // LOC100066364 // ubiquitin-like protein ISG15-like // --- // 100066364 /  | LOC100066364 | Cluster0002 |
| 15090478 | XM_001503876 // LOC100066365 // upstream stimulatory factor 1-like // --- // 100066365   | LOC100066365 | Cluster0002 |
| 15004871 | ENSECAT00000018650 // LOC100066403 // uncharacterized protein C13orf23-like // --- // 1  | LOC100066403 | Cluster0002 |
| 15124419 | ENSECAT00000022595 // LOC100066471 // 39S ribosomal protein L13, mitochondrial-like //   | LOC100066471 | Cluster0002 |
| 14960216 | XM_001495869 // LOC100066485 // cytosolic 5'-nucleotidase III-like protein-like // ---   | LOC100066485 | Cluster0002 |
| 14976176 | XM_001915877 // LOC100066486 // protein spinster homolog 1-like // --- // 100066486 ///  | LOC100066486 | Cluster0002 |
| 15108997 | ENSECAT00000008851 // LOC100066498 // uncharacterized LOC100066498 // --- // 100066498   | LOC100066498 | Cluster0002 |
| 14970059 | XM_001915002 // LOC100066506 // probable palmitoyltransferase ZDHHC5-like // --- // 100  | LOC100066506 | Cluster0002 |
| 15113996 | ENSECAT00000006341 // LOC100066526 // glycolipid transfer protein-like // --- // 100066  | LOC100066526 | Cluster0002 |
| 14937490 | XM_003363589 // LOC100066582 // methionyl-tRNA formyltransferase, mitochondrial-like //  | LOC100066582 | Cluster0002 |
| 14970164 | XM_001504696 // LOC100066623 // protein FAM111A-like // --- // 100066623 /// ENSECAT000  | LOC100066623 | Cluster0002 |
| 15085509 | ENSECAT00000000479 // LOC100066646 // nitrilase homolog 1-like // --- // 100066646 ///   | LOC100066646 | Cluster0002 |
| 14952767 | XM_001504002 // LOC100066652 // sphingomyelin phosphodiesterase 2-like // --- // 100066  | LOC100066652 | Cluster0002 |
| 14932368 | ENSECAT00000018606 // LOC100066719 // uncharacterized LOC100066719 // --- // 100066719   | LOC100066719 | Cluster0002 |
| 15118108 | XM_001496945 // LOC100066762 // ubiquitin carboxyl-terminal hydrolase 30-like // --- //  | LOC100066762 | Cluster0002 |
| 14988625 | XM_001496953 // LOC100066774 // t-cell surface glycoprotein CD8 alpha chain-like // ---  | LOC100066774 | Cluster0002 |
| 15076386 | ENSECAT00000000196 // LOC100066798 // syntaxin-11-like // --- // 100066798 /// XM_00150  | LOC100066798 | Cluster0002 |
| 14972800 | XM_001498309 // LOC100066866 // ubiquitin/ISG15-conjugating enzyme E2 L6-like // --- //  | LOC100066866 | Cluster0002 |
| 15052833 | XM_001500399 // LOC100066906 // probable palmitoyltransferase ZDHHC12-like // --- // 10  | LOC100066906 | Cluster0002 |
| 15036985 | XM_001915913 // LOC100066943 // protein FAM113A-like // --- // 100066943 /// ENSECAT000  | LOC100066943 | Cluster0002 |
| 15049937 | ENSECAT00000004413 // LOC100066985 // ubiquitin-related modifier 1 homolog // --- // 10  | LOC100066985 | Cluster0002 |
| 14974977 | ENSECAT00000012980 // LOC100066997 // zinc finger protein with KRAB and SCAN domains 5-  | LOC100066997 | Cluster0002 |
| 14972810 | XM_001498524 // LOC100066998 // mediator of RNA polymerase II transcription subunit 19-  | LOC100066998 | Cluster0002 |
| 14952904 | XM_001504125 // LOC100067001 // RWD domain-containing protein 1-like // --- // 10006700  | LOC100067001 | Cluster0002 |
| 15129214 | ENSECAT00000012441 // LOC100067023 // transcription elongation factor A protein-like 4-  | LOC100067023 | Cluster0002 |
| 15049888 | XM_001501110 // LOC100067056 // UPPF0184 protein C9orf16-like // --- // 100067056 /// EN | LOC100067056 | Cluster0002 |
| 15028695 | ENSECAT00000011282 // LOC100067096 // protein canopy homolog 3-like // --- // 100067096  | LOC100067096 | Cluster0002 |
| 15052724 | ENSECAT00000019047 // LOC100067121 // alpha-N-acetyl-neuraminyl-2,3-beta-galactosyl-1,3  | LOC100067121 | Cluster0002 |
| 15064988 | ENSECAT00000000227 // LOC100067168 // cytochrome b5 type B-like // --- // 100067168 ///  | LOC100067168 | Cluster0002 |
| 14992166 | ENSECAT00000004110 // LOC100067210 // u4/U6.U5 tri-snRNP-associated protein 2-like // -  | LOC100067210 | Cluster0002 |
| 14935818 | XM_001497324 // LOC100067226 // stAR-related lipid transfer protein 5-like // --- // 10  | LOC100067226 | Cluster0002 |
| 15052542 | XM_001502120 // LOC100067317 // proteasome subunit beta type-7-like // --- // 100067317  | LOC100067317 | Cluster0002 |
| 14992193 | ENSECAT00000007620 // LOC100067333 // s-adenosylmethionine synthase isoform type-2-like  | LOC100067333 | Cluster0002 |
| 15007540 | XM_001917545 // LOC100067359 // plectstrin homology domain-containing family A member 3  | LOC100067359 | Cluster0002 |
| 15037030 | XM_001497436 // LOC100067361 // signal-regulatory protein beta-1 isoform 3-like // ---   | LOC100067361 | Cluster0002 |
| 15008507 | XM_001504925 // LOC100067394 // protein FAM168B-like // --- // 100067394 /// ENSECAT000  | LOC100067394 | Cluster0002 |
| 14992226 | ENSECAT00000029001 // LOC100067403 // trans-Golgi network integral membrane protein 1-1  | LOC100067403 | Cluster0002 |
| 15022195 | ENSECAT00000019067 // LOC100067429 // phosphopantothenate--cysteine ligase-like // ---   | LOC100067429 | Cluster0002 |
| 14992239 | XM_001497509 // LOC100067474 // e3 ubiquitin-protein ligase KCMF1-like // --- // 100067  | LOC100067474 | Cluster0002 |
| 15082942 | ENSECAT00000019270 // LOC100067491 // solute carrier family 23 member 2-like // --- //   | LOC100067491 | Cluster0002 |
| 14975214 | XM_001505065 // LOC100067533 // ribonuclease P protein subunit p20-like // --- // 10006  | LOC100067533 | Cluster0002 |
| 15119990 | ENSECAT000000024782 // LOC100067571 // tubulin polyglutamylase complex subunit 2-like // | LOC100067571 | Cluster0002 |
| 15052407 | ENSECAT00000024562 // LOC100067589 // n-acetyllactosaminide alpha-1,3-galactosyltransfe  | LOC100067589 | Cluster0002 |
| 15052383 | ENSECAT00000012059 // LOC100067611 // ras-related protein Rab-14-like // --- // 1000676  | LOC100067611 | Cluster0002 |
| 15037048 | ENSECAT00000007007 // LOC100067632 // NSFL1 cofactor p47-like // --- // 100067632 /// X  | LOC100067632 | Cluster0002 |

|          |                                                                                           |              |             |
|----------|-------------------------------------------------------------------------------------------|--------------|-------------|
| 15051364 | XM_001497667 // LOC100067699 // uncharacterized LOC100067699 // --- // 100067699 // EN    | LOC100067699 | Cluster0002 |
| 15099520 | XM_001497705 // LOC100067736 // serine/threonine-protein kinase 25-like // --- // 10006   | LOC100067736 | Cluster0002 |
| 15008051 | ENSECAT000000026929 // LOC100067782 // aldehyde oxidase-like // --- // 100067782 // XM_   | LOC100067782 | Cluster0002 |
| 15048497 | XM_001914806 // LOC100067794 // cyclic AMP-responsive element-binding protein 3-like //   | LOC100067794 | Cluster0002 |
| 15011105 | ENSECAT000000021236 // LOC100067857 // peptidyl-prolyl cis-trans isomerase-like 3-like // | LOC100067857 | Cluster0002 |
| 15012190 | XM_001497843 // LOC100067916 // nmrA-like family domain-containing protein 1-like // --   | LOC100067916 | Cluster0002 |
| 15053355 | XM_001495072 // LOC100068036 // endothelial differentiation-related factor 1-like // --   | LOC100068036 | Cluster0002 |
| 14960586 | ENSECAT000000009491 // LOC100068111 // post-GPI attachment to proteins factor 3-like //   | LOC100068111 | Cluster0002 |
| 14954133 | XM_001498028 // LOC100068145 // flavin reductase-like // --- // 100068145 // ENSECAT00    | LOC100068145 | Cluster0002 |
| 14977399 | XM_001498121 // LOC100068257 // phosphoglycolate phosphatase-like // --- // 100068257 /   | LOC100068257 | Cluster0002 |
| 14950206 | XM_001499336 // LOC100068274 // u1 small nuclear ribonucleoprotein A-like // --- // 100   | LOC100068274 | Cluster0002 |
| 14977393 | XM_001498154 // LOC100068292 // enoyl-CoA delta isomerase 1, mitochondrial-like // ---    | LOC100068292 | Cluster0002 |
| 14965963 | XM_001917560 // LOC100068316 // cyclin-dependent kinase 12-like // --- // 100068316 //    | LOC100068316 | Cluster0002 |
| 14976380 | ENSECAT000000025755 // LOC100068356 // conserved oligomeric Golgi complex subunit 7-like  | LOC100068356 | Cluster0002 |
| 14979627 | XM_001501020 // LOC100068373 // dynactin subunit 5-like // --- // 100068373 // ENSECAT    | LOC100068373 | Cluster0002 |
| 15088736 | ENSECAT000000020999 // LOC100068435 // leucine-rich repeat-containing protein 40-like //  | LOC100068435 | Cluster0002 |
| 15108508 | XM_001504389 // LOC100068453 // mps one binder kinase activator-like 2A-like // --- //    | LOC100068453 | Cluster0002 |
| 15008377 | XM_001498308 // LOC100068470 // elongation factor 1-beta-like // --- // 100068470 // E    | LOC100068470 | Cluster0002 |
| 14993264 | ENSECAT00000007015 // LOC100068479 // rho-related GTP-binding protein RhoQ-like // ---    | LOC100068479 | Cluster0002 |
| 14980561 | ENSECAT000000025143 // LOC100068494 // BTB/POZ domain-containing protein KCTD5-like // -  | LOC100068494 | Cluster0002 |
| 15039797 | ENSECAT000000009698 // LOC100068515 // p53 and DNA damage-regulated protein 1-like // --  | LOC100068515 | Cluster0002 |
| 15044031 | XM_001503698 // LOC100068546 // dynactin subunit 3-like // --- // 100068546 // ENSECAT    | LOC100068546 | Cluster0002 |
| 15126632 | XM_001498387 // LOC100068567 // guanine nucleotide-binding protein subunit alpha-15-lik   | LOC100068567 | Cluster0002 |
| 15078932 | ENSECAT000000026029 // LOC100068568 // muskelin-like // --- // 100068568 // XM_00150099   | LOC100068568 | Cluster0002 |
| 15037237 | XM_001498396 // LOC100068573 // transmembrane 9 superfamily member 4-like // --- // 100   | LOC100068573 | Cluster0002 |
| 15033905 | ENSECAT000000006417 // LOC100068637 // Golgi phosphoprotein 3-like // --- // 100068637 /  | LOC100068637 | Cluster0002 |
| 14978360 | XM_001505047 // LOC100068673 // DNA replication licensing factor MCM7-like // --- // 10   | LOC100068673 | Cluster0002 |
| 15039822 | ENSECAT000000007932 // LOC100068709 // COMM domain-containing protein 7-like // --- // 1  | LOC100068709 | Cluster0002 |
| 15065360 | XM_001498629 // LOC100068818 // e3 ubiquitin-protein ligase ZNRF1-like // --- // 100068   | LOC100068818 | Cluster0002 |
| 15058853 | XM_001498659 // LOC100068847 // f-box only protein 7-like // --- // 100068847 // ENSEC    | LOC100068847 | Cluster0002 |
| 15103333 | ENSECAT000000000406 // LOC100068855 // NADH dehydrogenase [ubiquinone] iron-sulfur prote  | LOC100068855 | Cluster0002 |
| 14984579 | ENSECAT000000022244 // LOC100068903 // HIG1 domain family member 2A-like // --- // 10006  | LOC100068903 | Cluster0002 |
| 15016763 | ENSECAT000000016449 // LOC100068904 // c-Myc-binding protein-like // --- // 100068904 //  | LOC100068904 | Cluster0002 |
| 14980512 | XM_001499647 // LOC100068915 // THO complex subunit 6 homolog // --- // 100068915 // E    | LOC100068915 | Cluster0002 |
| 15053235 | ENSECAT000000000831 // LOC100069029 // ficolin-1-like // --- // 100069029 // XM_0014988   | LOC100069029 | Cluster0002 |
| 15058897 | ENSECAT000000001574 // LOC100069058 // heme oxygenase 1-like // --- // 100069058 // XM_   | LOC100069058 | Cluster0002 |
| 14988918 | XM_001498907 // LOC100069090 // 39S ribosomal protein L53, mitochondrial-like // --- //   | LOC100069090 | Cluster0002 |
| 15016893 | ENSECAT000000024079 // LOC100069157 // chromatin modification-related protein MEAF6-like  | LOC100069157 | Cluster0002 |
| 14969905 | ENSECAT000000000764 // LOC100069180 // olfactory receptor 5D18-like // --- // 100069180   | LOC100069180 | Cluster0002 |
| 14946599 | ENSECAT000000001594 // LOC100069185 // GPI mannosyltransferase 3-like // --- // 10006918  | LOC100069185 | Cluster0002 |
| 15037460 | XM_001499007 // LOC100069227 // charged multivesicular body protein 4b-like // --- // 1   | LOC100069227 | Cluster0002 |
| 15006078 | ENSECAT000000016185 // LOC100069263 // ras GTPase-activating protein 3-like // --- // 10  | LOC100069263 | Cluster0002 |
| 14960864 | ENSECAT0000000007817 // LOC100069329 // nuclear factor erythroid 2-related factor 1-like  | LOC100069329 | Cluster0002 |
| 15037497 | XM_001499130 // LOC100069352 // dynein light chain roadblock-type 1-like // --- // 1000   | LOC100069352 | Cluster0002 |
| 15060838 | ENSECAT000000014581 // LOC100069490 // thioredoxin, mitochondrial-like // --- // 1000694  | LOC100069490 | Cluster0002 |
| 14960892 | XM_001499269 // LOC100069523 // ATP synthase lipid-binding protein, mitochondrial-like    | LOC100069523 | Cluster0002 |
| 14960897 | ENSECAT000000022608 // LOC100069535 // ubiquitin-conjugating enzyme E2 Z-like // --- //   | LOC100069535 | Cluster0002 |
| 15108410 | XM_001499364 // LOC100069627 // methyl-CpG-binding domain protein 3-like // --- // 1000   | LOC100069627 | Cluster0002 |
| 14941856 | XM_003363424 // LOC100069640 // glutathione S-transferase omega-1-like // --- // 100069   | LOC100069640 | Cluster0002 |
| 15037687 | ENSECAT000000009144 // LOC100069675 // uncharacterized protein C20orf4 homolog // --- //  | LOC100069675 | Cluster0002 |
| 15014592 | ENSECAT000000000384 // LOC100069731 // leucine-rich repeat-containing protein 33-like //  | LOC100069731 | Cluster0002 |
| 14966218 | XM_001502482 // LOC100069752 // solute carrier family 35 member B1-like // --- // 10006   | LOC100069752 | Cluster0002 |
| 14984662 | XM_001502922 // LOC100069785 // v-type proton ATPase subunit e 1-like // --- // 1000697   | LOC100069785 | Cluster0002 |
| 14980378 | ENSECAT000000011648 // LOC100069818 // e3 ubiquitin-protein ligase MGRN1-like // --- //   | LOC100069818 | Cluster0002 |



|          |                                                                                          |              |             |
|----------|------------------------------------------------------------------------------------------|--------------|-------------|
| 14984671 | ENSECAT00000007756 // LOC100069822 // endoplasmic reticulum-Golgi intermediate compartm  | LOC100069822 | Cluster0002 |
| 15112364 | XM_001918081 // LOC100070052 // ribosomal RNA-processing protein 8-like // --- // 10007  | LOC100070052 | Cluster0002 |
| 15050148 | XM_001500126 // LOC100070077 // dolichyldiphosphatase 1-like // --- // 100070077 // EN   | LOC100070077 | Cluster0002 |
| 15112372 | XM_001499761 // LOC100070082 // transcription initiation factor TFIID subunit 10-like /  | LOC100070082 | Cluster0002 |
| 15017200 | ENSECAT000000015186 // LOC100070089 // transmembrane protein 54-like // --- // 100070089 | LOC100070089 | Cluster0002 |
| 15052879 | XM_001500252 // LOC100070129 // dolichol kinase-like // --- // 100070129 // ENSECAT000   | LOC100070129 | Cluster0002 |
| 15032662 | ENSECAT00000010523 // LOC100070171 // multivesicular body subunit 12A-like // --- // 10  | LOC100070171 | Cluster0002 |
| 15069958 | ENSECAT00000008862 // LOC100070186 // TLD domain-containing protein KIAA1609-like // --  | LOC100070186 | Cluster0002 |
| 14961180 | ENSECAT00000008650 // LOC100070268 // u3 small nucleolar RNA-associated protein 18 homo  | LOC100070268 | Cluster0002 |
| 15052731 | XM_001500031 // LOC100070379 // uncharacterized LOC100070379 // --- // 100070379 // EN   | LOC100070379 | Cluster0002 |
| 15052677 | ENSECAT00000015249 // LOC100070462 // prosalusin-like // --- // 100070462 // XM_001501   | LOC100070462 | Cluster0002 |
| 15012747 | XM_001500147 // LOC100070489 // 3-hydroxyacyl-CoA dehydratase 2-like // --- // 10007048  | LOC100070489 | Cluster0002 |
| 15049781 | XM_001500206 // LOC100070546 // zinc finger protein 79-like // --- // 100070546 // ENS   | LOC100070546 | Cluster0002 |
| 14966391 | XM_001500221 // LOC100070559 // monocyte to macrophage differentiation protein-like //   | LOC100070559 | Cluster0002 |
| 14993709 | ENSECAT00000023065 // LOC100070614 // zinc transporter 6-like // --- // 100070614 // X   | LOC100070614 | Cluster0002 |
| 14946985 | ENSECAT000000017166 // LOC100070663 // protein CASC4-like // --- // 100070663 // XM_001  | LOC100070663 | Cluster0002 |
| 14950603 | XM_001916978 // LOC100070664 // transcription factor RelB-like // --- // 100070664 //    | LOC100070664 | Cluster0002 |
| 15061257 | ENSECAT000000012509 // LOC100070677 // PPPDE peptidase domain-containing protein 2-like  | LOC100070677 | Cluster0002 |
| 15017453 | XM_001500352 // LOC100070682 // transcription initiation factor TFIID subunit 12-like /  | LOC100070682 | Cluster0002 |
| 14942385 | ENSECAT000000009383 // LOC100070708 // ubiquitin domain-containing protein 1-like // --- | LOC100070708 | Cluster0002 |
| 14966428 | XM_001500440 // LOC100070771 // 28S ribosomal protein S23, mitochondrial-like // --- //  | LOC100070771 | Cluster0002 |
| 14966443 | XM_001500508 // LOC100070832 // vascular endothelial zinc finger 1-like // --- // 10007  | LOC100070832 | Cluster0002 |
| 15017504 | XM_001500542 // LOC100070860 // interferon alpha-inducible protein 6-like // --- // 100  | LOC100070860 | Cluster0002 |
| 15032815 | XM_001500556 // LOC100070878 // gamma-interferon-inducible-lysosomal thiol reductase-li  | LOC100070878 | Cluster0002 |
| 15032822 | XM_003363830 // LOC100070886 // mpv17-like protein 2-like // --- // 100070886 // ENSEC   | LOC100070886 | Cluster0002 |
| 15049659 | ENSECAT000000022973 // LOC100070894 // rab9 effector protein with kelch motifs-like // - | LOC100070894 | Cluster0002 |
| 15038156 | ENSECAT000000022597 // LOC100070943 // protein SYS1 homolog // --- // 100070943 // XM_0  | LOC100070943 | Cluster0002 |
| 15052572 | XM_001502048 // LOC100070944 // 60S ribosomal protein L35-like // --- // 100070944 //    | LOC100070944 | Cluster0002 |
| 15017608 | XM_001504054 // LOC100070998 // GPN-loop GTPase 2-like // --- // 100070998 // ENSECAT0   | LOC100070998 | Cluster0002 |
| 15061338 | XM_001503005 // LOC100071003 // NFAT activation molecule 1-like // --- // 100071003 //   | LOC100071003 | Cluster0002 |
| 15107646 | XM_001504903 // LOC100071004 // 60S ribosomal protein L27a-like // --- // 100071004 //   | LOC100071004 | Cluster0002 |
| 15061344 | XM_001503030 // LOC100071022 // ribosomal RNA-processing protein 7 homolog A-like // --  | LOC100071022 | Cluster0002 |
| 14993835 | ENSECAT000000016734 // LOC100071067 // serine/threonine-protein phosphatase PP1-beta cat | LOC100071067 | Cluster0002 |
| 15059496 | XM_001503143 // LOC100071110 // translocator protein-like // --- // 100071110 // ENSEC   | LOC100071110 | Cluster0002 |
| 15034884 | XM_001503445 // LOC100071132 // protein MEF2BNB-like // --- // 100071132 // ENSECAT000   | LOC100071132 | Cluster0002 |
| 14950799 | ENSECAT000000023978 // LOC100071150 // calmodulin-like // --- // 100071150 // ENSECAT00  | LOC100071150 | Cluster0002 |
| 14954752 | XM_001917113 // LOC100071175 // striatin-4-like // --- // 100071175 // ENSECAT000000003  | LOC100071175 | Cluster0002 |
| 15052467 | ENSECAT000000022631 // LOC100071180 // phosducin-like protein-like // --- // 100071180 / | LOC100071180 | Cluster0002 |
| 15049529 | XM_001500963 // LOC100071258 // olfactory receptor 1L6-like // --- // 100071258 // ENS   | LOC100071258 | Cluster0002 |
| 15023253 | XM_001504118 // LOC100071263 // protein FAM54B-like // --- // 100071263 // ENSECAT0000   | LOC100071263 | Cluster0002 |
| 15104851 | XM_001503069 // LOC100071306 // trafficking protein particle complex subunit 4-like //   | LOC100071306 | Cluster0002 |
| 15104874 | ENSECAT000000019023 // LOC100071339 // porphobilinogen deaminase-like // --- // 10007133 | LOC100071339 | Cluster0002 |
| 14939190 | ENSECAT000000026484 // LOC100071368 // uncharacterized protein C15orf57-like // --- // 1 | LOC100071368 | Cluster0002 |
| 14961618 | XM_001501168 // LOC100071416 // dehydrogenase/reductase SDR family member 11-like // --  | LOC100071416 | Cluster0002 |
| 15038451 | XM_001501211 // LOC100071447 // RING finger protein 114-like // --- // 100071447 // EN   | LOC100071447 | Cluster0002 |
| 15023321 | ENSECAT000000017238 // LOC100071457 // chloride intracellular channel protein 4-like //  | LOC100071457 | Cluster0002 |
| 14982073 | ENSECAT000000013782 // LOC100071499 // copper transport protein ATOX1-like // --- // 100 | LOC100071499 | Cluster0002 |
| 15052443 | XM_001501351 // LOC100071560 // olfactory receptor 1J1-like // --- // 100071560 // ENS   | LOC100071560 | Cluster0002 |
| 15049460 | ENSECAT000000027081 // LOC100071623 // ribosome-recycling factor, mitochondrial-like //  | LOC100071623 | Cluster0002 |
| 14982212 | XM_001503714 // LOC100071636 // 40S ribosomal protein S14-like // --- // 100071636 //    | LOC100071636 | Cluster0002 |
| 15128873 | ENSECAT00000002701 // LOC100071709 // peroxiredoxin-1-like // --- // 100071709 // XM_0   | LOC100071709 | Cluster0002 |
| 14967022 | XM_001918320 // LOC100071770 // 26S proteasome non-ATPase regulatory subunit 11-like //  | LOC100071770 | Cluster0002 |
| 15052312 | XM_001501657 // LOC100071800 // 26S proteasome non-ATPase regulatory subunit 5-like //   | LOC100071800 | Cluster0002 |
| 14990841 | ENSECAT000000015437 // LOC100071892 // syndecan-1-like // --- // 100071892 // XM_001501  | LOC100071892 | Cluster0002 |

|          |                                                                                          |              |             |
|----------|------------------------------------------------------------------------------------------|--------------|-------------|
| 14939484 | XM_001501844 // LOC100071996 // olfactory receptor 4F21-like // --- // 100071996 // EN   | LOC100071996 | Cluster0002 |
| 14967266 | ENSECAT00000016620 // LOC100072041 // homeobox protein SEBOX-like // --- // 100072041 // | LOC100072041 | Cluster0002 |
| 15067826 | ENSECAT00000002179 // LOC100072076 // 60S ribosomal protein L23a-like // --- // 1000720  | LOC100072076 | Cluster0002 |
| 14934214 | XM_001503361 // LOC100072162 // CDGSH iron-sulfur domain-containing protein 1-like // -  | LOC100072162 | Cluster0002 |
| 15015343 | ENSECAT000000021973 // LOC100072249 // protein TFG-like // --- // 100072249 // XM_00150  | LOC100072249 | Cluster0002 |
| 15128880 | XM_001502247 // LOC100072334 // apolipoprotein O-like // --- // 100072334 // ENSECAT00   | LOC100072334 | Cluster0002 |
| 14994472 | XM_001502263 // LOC100072348 // PQ-loop repeat-containing protein 3-like // --- // 1000  | LOC100072348 | Cluster0002 |
| 14982649 | XM_001502340 // LOC100072416 // steroid receptor RNA activator 1-like // --- // 1000724  | LOC100072416 | Cluster0002 |
| 14939620 | XM_001505131 // LOC100072588 // DNA-(apurinic or apyrimidinic site) lyase-like // --- /  | LOC100072588 | Cluster0002 |
| 15132294 | ENSECAT00000010652 // LOC100072650 // transcription initiation factor TFIID subunit 9B-  | LOC100072650 | Cluster0002 |
| 14939663 | ENSECAT00000014270 // LOC100072699 // methyltransferase-like protein 17, mitochondrial-  | LOC100072699 | Cluster0002 |
| 14968159 | ENSECAT00000026936 // LOC100072746 // XIAP-associated factor 1-like // --- // 100072746  | LOC100072746 | Cluster0002 |
| 14943332 | XM_001502798 // LOC100072758 // uncharacterized LOC100072758 // --- // 100072758 // EN   | LOC100072758 | Cluster0002 |
| 14934642 | XM_001502808 // LOC100072768 // equilibrative nucleoside transporter 3-like // --- // 1  | LOC100072768 | Cluster0002 |
| 14983003 | ENSECAT00000018154 // LOC100072795 // keratinocyte-associated transmembrane protein 2-I  | LOC100072795 | Cluster0002 |
| 14943366 | ENSECAT00000018296 // LOC100072800 // activating signal cointegrator 1 complex subunit   | LOC100072800 | Cluster0002 |
| 15026392 | XM_001502923 // LOC100072864 // coiled-coil domain-containing protein 109B-like // ---   | LOC100072864 | Cluster0002 |
| 14962748 | XM_001503003 // LOC100072920 // chromatin complexes subunit BAP18-like // --- // 100072  | LOC100072920 | Cluster0002 |
| 14934962 | ENSECAT00000009285 // LOC100073016 // peptidyl-prolyl cis-trans isomerase F, mitochondr  | LOC100073016 | Cluster0002 |
| 14968611 | XM_001503188 // LOC100073047 // vesicle-associated membrane protein 2-like // --- // 10  | LOC100073047 | Cluster0002 |
| 15125887 | XM_001914994 // LOC100073052 // glioma tumor suppressor candidate region gene 2 protein  | LOC100073052 | Cluster0002 |
| 14986447 | ENSECAT000000025231 // LOC100073132 // tumor necrosis factor alpha-induced protein 8-lik | LOC100073132 | Cluster0002 |
| 14957654 | XM_003362372 // LOC100073151 // serine/threonine-protein kinase Sgk1-like // --- // 100  | LOC100073151 | Cluster0002 |
| 14986603 | XM_001503350 // LOC100073184 // signal recognition particle 19 kDa protein-like // ---   | LOC100073184 | Cluster0002 |
| 14957828 | ENSECAT00000017544 // LOC100073201 // ralBP1-associated Eps domain-containing protein 1  | LOC100073201 | Cluster0002 |
| 15111351 | XM_001917013 // LOC100146180 // ras-related protein Rab-11B-like // --- // 100146180 //  | LOC100146180 | Cluster0002 |
| 14954417 | ENSECAT00000011285 // LOC100146195 // protein ETHE1, mitochondrial-like // --- // 10014  | LOC100146195 | Cluster0002 |
| 15108701 | ENSECAT000000023579 // LOC100146236 // UBX domain-containing protein 6-like // --- // 10 | LOC100146236 | Cluster0002 |
| 15087565 | ENSECAT00000010529 // LOC100146263 // rho-related GTP-binding protein RhoC-like // ---   | LOC100146263 | Cluster0002 |
| 15050999 | ENSECAT000000009587 // LOC100146303 // uncharacterized protein C9orf142-like // --- // 1 | LOC100146303 | Cluster0002 |
| 15061672 | ENSECAT00000013531 // LOC100146361 // histone deacetylase 10-like // --- // 100146361    | LOC100146361 | Cluster0002 |
| 15106505 | XM_001916994 // LOC100146400 // zinc finger protein 414-like // --- // 100146400 // EN   | LOC100146400 | Cluster0002 |
| 15069524 | XM_001916072 // LOC100146422 // IST1 homolog // --- // 100146422 // ENSECAT00000024550   | LOC100146422 | Cluster0002 |
| 15044313 | ENSECAT000000004127 // LOC100146457 // f-box only protein 34-like // --- // 100146457    | LOC100146457 | Cluster0002 |
| 14974056 | XM_001917559 // LOC100146465 // cyclin-dependent kinase 2-associated protein 2-like //   | LOC100146465 | Cluster0002 |
| 15038789 | ENSECAT000000028942 // LOC100146483 // opioid growth factor receptor-like // --- // 1001 | LOC100146483 | Cluster0002 |
| 15091026 | ENSECAT000000006190 // LOC100146589 // polyamine-modulated factor 1-like // --- // 10014 | LOC100146589 | Cluster0002 |
| 15110764 | ENSECAT000000026537 // LOC100146594 // UV excision repair protein RAD23 homolog A-like / | LOC100146594 | Cluster0002 |
| 14953972 | XM_001916350 // LOC100146611 // NAD-dependent deacetylase sirtuin-2-like // --- // 1001  | LOC100146611 | Cluster0002 |
| 15061614 | ENSECAT000000025871 // LOC100146652 // dolichyl-P-Man:Man(7)GlcNAc(2)-PP-dolichyl-alpha- | LOC100146652 | Cluster0002 |
| 15032778 | ENSECAT000000008180 // LOC100146664 // microtubule-associated serine/threonine-protein k | LOC100146664 | Cluster0002 |
| 15122768 | ENSECAT000000021923 // LOC100146668 // cytochrome c1, heme protein, mitochondrial-like / | LOC100146668 | Cluster0002 |
| 15038569 | XM_001914850 // LOC100146683 // RNA-binding protein 38-like // --- // 100146683 // ENS   | LOC100146683 | Cluster0002 |
| 14962809 | XM_001918138 // LOC100146743 // eukaryotic translation initiation factor 5A-1-like // -  | LOC100146743 | Cluster0002 |
| 14984536 | ENSECAT000000023790 // LOC100146751 // tetraspanin-17-like // --- // 100146751 // XM_00  | LOC100146751 | Cluster0002 |
| 14971846 | XM_001917602 // LOC100146758 // patatin-like phospholipase domain-containing protein 2-  | LOC100146758 | Cluster0002 |
| 14970550 | XM_001916375 // LOC100146759 // tetratricopeptide repeat protein 9C-like // --- // 1001  | LOC100146759 | Cluster0002 |
| 14998654 | ENSECAT000000017231 // LOC100146781 // transmembrane protein adipocyte-associated 1-like | LOC100146781 | Cluster0002 |
| 15110820 | XM_001915055 // LOC100146801 // transcription factor jun-B-like // --- // 100146801 //   | LOC100146801 | Cluster0002 |
| 15125865 | XM_001914701 // LOC100146886 // RING finger protein 126-like // --- // 100146886 // EN   | LOC100146886 | Cluster0002 |
| 15026845 | XM_001915240 // LOC100146898 // nucleolar protein 7-like // --- // 100146898 // ENSECA   | LOC100146898 | Cluster0002 |
| 14954767 | XM_001917363 // LOC100146913 // neutral amino acid transporter B(0)-like // --- // 1001  | LOC100146913 | Cluster0002 |
| 14967510 | ENSECAT000000009742 // LOC100146940 // ARF GTPase-activating protein GT1-like // --- //  | LOC100146940 | Cluster0002 |
| 14977731 | XM_001915361 // LOC100147047 // jmjC domain-containing protein 8-like // --- // 1001470  | LOC100147047 | Cluster0002 |

|          |                                                                                          |              |             |
|----------|------------------------------------------------------------------------------------------|--------------|-------------|
| 15058963 | XM_001916763 // LOC100147078 // ADP-ribosylation factor-binding protein GGA1-like // --  | LOC100147078 | Cluster0002 |
| 15032736 | XM_001915146 // LOC100147159 // 60S ribosomal protein L18a-like // --- // 100147159 ///  | LOC100147159 | Cluster0002 |
| 14972597 | XM_001915957 // LOC100147187 // olfactory receptor 8U8-like // --- // 100147187 /// ENS  | LOC100147187 | Cluster0002 |
| 15051055 | XM_001917520 // LOC100147202 // Sjogren syndrome nuclear autoantigen 1 homolog // ---    | LOC100147202 | Cluster0002 |
| 15000138 | ENSECAT00000014540 // LOC100147234 // testis-expressed sequence 264 protein-like // ---  | LOC100147234 | Cluster0002 |
| 15032479 | ENSECAT00000006719 // LOC100147248 // ras-related protein Rab-8A-like // --- // 1001472  | LOC100147248 | Cluster0002 |
| 15125203 | ENSECAT00000016258 // LOC100147359 // diacylglycerol O-acyltransferase 1-like // --- //  | LOC100147359 | Cluster0002 |
| 14962744 | XM_001918130 // LOC100147426 // ribonuclease kappa-like // --- // 100147426 /// ENSECAT  | LOC100147426 | Cluster0002 |
| 15119976 | XM_001916074 // LOC100147463 // zinc transporter ZIP6-like // --- // 100147463 /// ENSE  | LOC100147463 | Cluster0002 |
| 15053532 | XM_001917548 // LOC100147491 // WD repeat-containing protein 85-like // --- // 10014749  | LOC100147491 | Cluster0002 |
| 14960985 | XM_001917680 // LOC100147514 // pyruvate dehydrogenase [lipoamide] kinase isozyme 2-lik  | LOC100147514 | Cluster0002 |
| 15094181 | ENSECAT00000014590 // LOC100147528 // protein FAM134A-like // --- // 100147528 /// XM_0  | LOC100147528 | Cluster0002 |
| 15126505 | XM_001915070 // LOC100147535 // lymphocyte-specific protein 1-like // --- // 100147535   | LOC100147535 | Cluster0002 |
| 15065419 | XM_001916328 // LOC100147597 // vacuolar fusion protein MON1 homolog B-like // --- // 1  | LOC100147597 | Cluster0002 |
| 14965865 | XM_001918070 // LOC100147612 // 26S proteasome non-ATPase regulatory subunit 3-like //   | LOC100147612 | Cluster0002 |
| 14958026 | ENSECAT00000018452 // LOC100147615 // transcription factor MafG-like // --- // 10014761  | LOC100147615 | Cluster0002 |
| 15126748 | XM_001916534 // LOC100147619 // midnolin-like // --- // 100147619 /// ENSECAT0000000825  | LOC100147619 | Cluster0002 |
| 15125800 | XM_001916676 // LOC100147630 // DDB1- and CUL4-associated factor 15-like // --- // 1001  | LOC100147630 | Cluster0002 |
| 15034418 | ENSECAT00000018663 // LOC100147631 // acetolactate synthase-like protein-like // --- //  | LOC100147631 | Cluster0002 |
| 15126700 | ENSECAT00000022388 // LOC100147642 // mediator of RNA polymerase II transcription subun  | LOC100147642 | Cluster0002 |
| 14990246 | XM_001917878 // LOC100147678 // protein MEMO1-like // --- // 100147678 /// ENSECAT00000  | LOC100147678 | Cluster0002 |
| 14989780 | XM_003362994 // LOC100629145 // calmodulin-like // --- // 100629145 /// ENSECAT000000008 | LOC100629145 | Cluster0002 |
| 15089804 | XM_003364942 // LOC100629233 // uncharacterized LOC100629233 // --- // 100629233 /// EN  | LOC100629233 | Cluster0002 |
| 15028080 | XM_003363770 // LOC100629238 // high mobility group protein HMG-I/HMG-Y-like // --- //   | LOC100629238 | Cluster0002 |
| 15007979 | ENSECAT00000028818 // LOC100629260 // 20 kDa chaperonin, chloroplastic-like // --- // 1  | LOC100629260 | Cluster0002 |
| 15104419 | ENSECAT00000012267 // LOC100629277 // UPF0686 protein C11orf1 homolog // --- // 1006292  | LOC100629277 | Cluster0002 |
| 15111033 | ENSECAT00000021186 // LOC100629291 // protein HIDE1-like // --- // 100629291 /// XM_003  | LOC100629291 | Cluster0002 |
| 15124038 | XM_003365653 // LOC100629307 // zinc finger protein 706-like // --- // 100629307 /// EN  | LOC100629307 | Cluster0002 |
| 15086861 | XM_003365033 // LOC100629318 // CDC42 small effector protein 1-like // --- // 100629318  | LOC100629318 | Cluster0002 |
| 15079262 | XM_003364867 // LOC100629380 // single-stranded DNA-binding protein, mitochondrial-like  | LOC100629380 | Cluster0002 |
| 15019185 | XM_003364468 // LOC100629488 // uncharacterized LOC100629488 // --- // 100629488 /// EN  | LOC100629488 | Cluster0002 |
| 15066373 | ENSECAT00000012525 // LOC100629544 // uncharacterized protein C4orf36-like // --- // 10  | LOC100629544 | Cluster0002 |
| 15025697 | XM_003364506 // LOC100629585 // u6 snRNA-associated Sm-like protein LSm6-like // --- //  | LOC100629585 | Cluster0002 |
| 15075834 | ENSECAT000000021493 // LOC100629586 // brain protein 44-like protein-like // --- // 1006 | LOC100629586 | Cluster0002 |
| 15046503 | ENSECAT00000008215 // LOC100629687 // inverted formin-2-like // --- // 100629687         | LOC100629687 | Cluster0002 |
| 15031219 | ENSECAT00000005038 // LOC100629770 // uncharacterized protein C3orf18-like // --- // 10  | LOC100629770 | Cluster0002 |
| 15096334 | ENSECAT00000019669 // LOC100629790 // LYR motif-containing protein 5-like // --- // 100  | LOC100629790 | Cluster0002 |
| 15027038 | ENSECAT000000021472 // LOC100629805 // acyl-coenzyme A thioesterase 13-like // --- // 10 | LOC100629805 | Cluster0002 |
| 15064514 | XM_003364593 // LOC100629814 // CKLF-like MARVEL transmembrane domain-containing protei  | LOC100629814 | Cluster0002 |
| 14939658 | ENSECAT00000012091 // LOC100629897 // ribonuclease K6-like // --- // 100629897 /// XM_0  | LOC100629897 | Cluster0002 |
| 15100413 | XM_003365170 // LOC100629907 // c-type lectin domain family 2 member B-like // --- // 1  | LOC100629907 | Cluster0002 |
| 15052920 | XM_003364107 // LOC100629960 // torsin-1A-like // --- // 100629960 /// ENSECAT000000147  | LOC100629960 | Cluster0002 |
| 15027612 | ENSECAT00000011113 // LOC100629969 // leukocyte-specific transcript 1 protein-like // -  | LOC100629969 | Cluster0002 |
| 15113545 | XM_003365481 // LOC100630004 // ubiquitin-conjugating enzyme E2 L3-like // --- // 10063  | LOC100630004 | Cluster0002 |
| 15055592 | XM_003364189 // LOC100630015 // uncharacterized LOC100630015 // --- // 100630015 /// EN  | LOC100630015 | Cluster0002 |
| 14952468 | XM_003362348 // LOC100630070 // proline-rich nuclear receptor coactivator 1-like // ---  | LOC100630070 | Cluster0002 |
| 15120823 | ENSECAT00000014301 // LOC100630092 // uncharacterized protein C8orf59 homolog // --- //  | LOC100630092 | Cluster0002 |
| 14956129 | ENSECAT00000012977 // LOC100630209 // cytochrome c oxidase subunit 7A2, mitochondrial-1  | LOC100630209 | Cluster0002 |
| 14992425 | XM_003362965 // LOC100630257 // WW domain-binding protein 1-like // --- // 100630257 //  | LOC100630257 | Cluster0002 |
| 14999157 | XM_003363036 // LOC100630258 // actin-related protein 2/3 complex subunit 4-like // ---  | LOC100630258 | Cluster0002 |
| 14947684 | XM_003363530 // LOC100630310 // H/ACA ribonucleoprotein complex subunit 3-like // --- // | LOC100630310 | Cluster0002 |
| 15045955 | XM_003364025 // LOC100630389 // transcriptional repressor protein YY1-like // --- // 10  | LOC100630389 | Cluster0002 |
| 15066529 | XM_003364673 // LOC100630403 // placenta-specific gene 8 protein-like // --- // 1006304  | LOC100630403 | Cluster0002 |
| 14951938 | XM_003362241 // LOC100630476 // uncharacterized LOC100630476 // --- // 100630476 /// EN  | LOC100630476 | Cluster0002 |

|          |                                                                                          |              |             |
|----------|------------------------------------------------------------------------------------------|--------------|-------------|
| 15066070 | XM_003364657 // LOC100630481 // ubiquitin-conjugating enzyme E2 D3-like // --- // 10063  | LOC100630481 | Cluster0002 |
| 15023382 | ENSECAT00000026511 // LOC100630531 // proline-rich nuclear receptor coactivator 2-like   | LOC100630531 | Cluster0002 |
| 14998629 | ENSECAT00000001739 // LOC100630536 // small ubiquitin-related modifier 2-like // --- //  | LOC100630536 | Cluster0002 |
| 15025826 | XM_003364513 // LOC100630562 // microsomal glutathione S-transferase 2-like // --- // 1  | LOC100630562 | Cluster0002 |
| 15088800 | ENSECAT00000014687 // LOC100630574 // guanine nucleotide-binding protein G(1)/G(S)/G(O)  | LOC100630574 | Cluster0002 |
| 15091698 | ENSECAT00000013394 // LOC100630631 // uncharacterized protein C1orf54-like // --- // 10  | LOC100630631 | Cluster0002 |
| 14965618 | XM_003362480 // LOC100630685 // receptor activity-modifying protein 2-like // --- // 10  | LOC100630685 | Cluster0002 |
| 15042435 | XM_003363965 // LOC100630740 // galactose-1-phosphate uridylyltransferase-like // --- // | LOC100630740 | Cluster0002 |
| 15062811 | ENSECAT00000006430 // LOC100630762 // signal peptidase complex subunit 1-like // --- //  | LOC100630762 | Cluster0002 |
| 14949221 | XM_003362325 // LOC100630820 // CCAAT/enhancer-binding protein gamma-like // --- // 100  | LOC100630820 | Cluster0002 |
| 15077975 | ENSECAT00000020901 // LOC100630867 // coiled-coil domain-containing protein 126-like //  | LOC100630867 | Cluster0002 |
| 15100100 | XM_001497952 // LPCAT3 // lysophosphatidylcholine acyltransferase 3 // --- // 100053035  | LPCAT3       | Cluster0002 |
| 15012575 | ENSECAT00000025615 // LRCH3 // leucine-rich repeats and calponin homology (CH) domain c  | LRCH3        | Cluster0002 |
| 15050083 | XM_001500261 // LRRRC8A // leucine rich repeat containing 8 family, member A // --- // 1 | LRRRC8A      | Cluster0002 |
| 15123056 | ENSECAT00000015817 // LRRCC1 // leucine rich repeat and coiled-coil centrosomal protein  | LRRCC1       | Cluster0002 |
| 15060388 | XM_001494765 // LTA4H // leukotriene A4 hydrolase // --- // 100052257 // ENSECAT0000000  | LTA4H        | Cluster0002 |
| 15123195 | NM_001081898 // LY96 // lymphocyte antigen 96 // --- // 100034040 // ENSECAT0000001850   | LY96         | Cluster0002 |
| 15108665 | ENSECAT00000010103 // MAP2K2 // mitogen-activated protein kinase 2 // --- // ---         | MAP2K2       | Cluster0002 |
| 14965039 | ENSECAT00000009384 // MAP3K3 // mitogen-activated protein kinase kinase kinase 3 // ---  | MAP3K3       | Cluster0002 |
| 15062032 | XM_001494766 // MAP3K8 // mitogen-activated protein kinase kinase kinase 8 // --- // 10  | MAP3K8       | Cluster0002 |
| 15032956 | XM_001503477 // MAU2 // MAU2 chromatid cohesion factor homolog (C. elegans) // --- // 1  | MAU2         | Cluster0002 |
| 15101847 | XM_001504207 // MCRS1 // microspherule protein 1 // --- // 100051964 // XM_001504209 /   | MCRS1        | Cluster0002 |
| 14978700 | NM_001195526 // MDH2 // malate dehydrogenase 2, NAD (mitochondrial) // --- // 100061046  | MDH2         | Cluster0002 |
| 14960598 | ENSECAT00000009851 // MED1 // mediator complex subunit 1 // --- // 100054967             | MED1         | Cluster0002 |
| 14936372 | XM_001489154 // MEF2A // myocyte enhancer factor 2A // --- // 100050068 // ENSECAT0000   | MEF2A        | Cluster0002 |
| 14975148 | XM_001498760 // MEPCE // methylphosphate capping enzyme // --- // 100068939 // ENSECAT   | MEPCE        | Cluster0002 |
| 14968255 | XM_001918365 // MINK1 // misshapen-like kinase 1 // --- // 100061370 // ENSECAT0000000   | MINK1        | Cluster0002 |
| 15095058 | NR_032854 // MIR149 // microRNA mir-149 // --- // 100314817                              | MIR149       | Cluster0002 |
| 15089475 | NR_032843 // MIR214 // microRNA mir-214 // --- // 100314811                              | MIR214       | Cluster0002 |
| 15131506 | NR_033079 // MIR221 // microRNA mir-221 // --- // 100314997                              | MIR221       | Cluster0002 |
| 15079960 | NR_032831 // MIR671 // microRNA mir-671 // --- // 100315004                              | MIR671       | Cluster0002 |
| 15016244 | ENSECAT000000022623 // MKNK1 // MAP kinase interacting serine/threonine kinase 1 // ---  | MKNK1        | Cluster0002 |
| 15016240 | ENSECAT00000025642 // MOB3C // MOB kinase activator 3C // --- // ---                     | MOB3C        | Cluster0002 |
| 14996293 | XM_001915918 // MON1A // MON1 homolog A (yeast) // --- // 100062456 // ENSECAT000000025  | MON1A        | Cluster0002 |
| 15054013 | XM_001493319 // MORC3 // MORC family CW-type zinc finger 3 // --- // 100061343 // ENSE   | MORC3        | Cluster0002 |
| 14975199 | XM_001505059 // MOSPD3 // motile sperm domain containing 3 // --- // 100067442 // ENSE   | MOSPD3       | Cluster0002 |
| 15092177 | XM_001499121 // MOV10 // Mov10, Moloney leukemia virus 10, homolog (mouse) // --- // 10  | MOV10        | Cluster0002 |
| 14962969 | XM_001504782 // MPDU1 // mannose-P-dolichol utilization defect 1 // --- // 100062007 //  | MPDU1        | Cluster0002 |
| 14936472 | ENSECAT00000006174 // MPHOSPH10 // M-phase phosphoprotein 10 (U3 small nucleolar ribonu  | MPHOSPH10    | Cluster0002 |
| 14973918 | ENSECAT00000014431 // MRPL11 // mitochondrial ribosomal protein L11 // --- // 100052531  | MRPL11       | Cluster0002 |
| 15126359 | XM_001915037 // MTA1 // metastasis associated 1 // --- // 100146742 // ENSECAT000000009  | MTA1         | Cluster0002 |
| 15123896 | XM_001490437 // MTERFD1 // MTERF domain containing 1 // --- // 100055471 // ENSECAT000   | MTERFD1      | Cluster0002 |
| 15063012 | ENSECAT000000000008 // MTPAP // mitochondrial poly(A) polymerase // --- // 100055113 //  | MTPAP        | Cluster0002 |
| 15020172 | XM_001498445 // NAF1 // nuclear assembly factor 1 homolog (S. cerevisiae) // --- // 100  | NAF1         | Cluster0002 |
| 15061278 | ENSECAT00000012021 // NAGA // N-acetylgalactosaminidase, alpha- // --- // 100070793 //   | NAGA         | Cluster0002 |
| 14965682 | XM_001917361 // NAGLU // N-acetylglucosaminidase, alpha // --- // 100066052 // ENSECAT   | NAGLU        | Cluster0002 |
| 15038323 | ENSECAT000000022749 // NCOA3 // nuclear receptor coactivator 3 // --- // 100071296 // X  | NCOA3        | Cluster0002 |
| 14976166 | ENSECAT00000010865 // NFATC2IP // nuclear factor of activated T-cells, cytoplasmic, cal  | NFATC2IP     | Cluster0002 |
| 15040133 | XM_001501792 // NFS1 // NFS1 nitrogen fixation 1 homolog (S. cerevisiae) // --- // 1000  | NFS1         | Cluster0002 |
| 15022238 | ENSECAT000000002155 // NFYC // nuclear transcription factor Y, gamma // --- // 100053895 | NFYC         | Cluster0002 |
| 15023353 | ENSECAT000000024594 // NIPAL3 // NIPA-like domain containing 3 // --- // 100071495 // X  | NIPAL3       | Cluster0002 |
| 15043924 | XM_001499370 // NOL6 // nucleolar protein family 6 (RNA-associated) // --- // 100053901  | NOL6         | Cluster0002 |
| 15039632 | XM_001497181 // NOP56 // NOP56 ribonucleoprotein homolog (yeast) // --- // 100067054 //  | NOP56        | Cluster0002 |
| 14977797 | ENSECAT00000018658 // NPRL3 // nitrogen permease regulator-like 3 (S. cerevisiae) // --  | NPRL3        | Cluster0002 |

|          |                                                                                          |          |             |
|----------|------------------------------------------------------------------------------------------|----------|-------------|
| 14993989 | ENSECAT00000008586 // NRBP1 // nuclear receptor binding protein 1 // --- // 100055145 /  | NRBP1    | Cluster0002 |
| 15130299 | ENSECAT00000002465 // NSDHL // NAD(P) dependent steroid dehydrogenase-like // --- // 10  | NSDHL    | Cluster0002 |
| 15050413 | XM_001917273 // NUP214 // nucleoporin 214kDa // --- // 100069634 /// ENSECAT00000024446  | NUP214   | Cluster0002 |
| 14962611 | ENSECAT00000013793 // NUP88 // nucleoporin 88kDa // --- // 100061117 /// XM_001504741 /  | NUP88    | Cluster0002 |
| 15114137 | NM_001081797 // OASL // 2 -5 -oligoadenylate synthetase-like // --- // 100009702 /// EN  | OASL     | Cluster0002 |
| 15021553 | XM_001491520 // OSBPL9 // oxysterol binding protein-like 9 // --- // 100051050 /// ENSE  | OSBPL9   | Cluster0002 |
| 15065586 | ENSECAT00000024631 // OSGIN1 // oxidative stress induced growth inhibitor 1 // --- // -  | OSGIN1   | Cluster0002 |
| 15020540 | ENSECAT000000025178 // OTUD4 // OTU domain containing 4 // --- // 100070999 /// XM_00150 | OTUD4    | Cluster0002 |
| 15111981 | NM_001257152 // P2RY2 // purinergic receptor P2Y, G-protein coupled, 2 // --- // 100065  | P2RY2    | Cluster0002 |
| 15061389 | ENSECAT00000012057 // PACSIN2 // protein kinase C and casein kinase substrate in neuron  | PACSIN2  | Cluster0002 |
| 14977149 | ENSECAT00000020560 // PAM16 // presequence translocase-associated motor 16 homolog (S.   | PAM16    | Cluster0002 |
| 14987230 | ENSECAT00000013349 // PAPD4 // PAP associated domain containing 4 // --- // 100065390 /  | PAPD4    | Cluster0002 |
| 14971013 | ENSECAT00000012180 // PCNXL3 // pecanex-like 3 (Drosophila) // --- // 100057407          | PCNXL3   | Cluster0002 |
| 15109812 | XM_001502605 // PCSK7 // proprotein convertase subtilisin/kexin type 7 // --- // 100062  | PCSK7    | Cluster0002 |
| 14999682 | ENSECAT00000005601 // PDE12 // phosphodiesterase 12 // --- // 100058532 /// XM_00148997  | PDE12    | Cluster0002 |
| 15097419 | XM_001504577 // PDE1B // phosphodiesterase 1B, calmodulin-dependent // --- // 100064711  | PDE1B    | Cluster0002 |
| 14980570 | ENSECAT00000002053 // PDPK1 // 3-phosphoinositide dependent protein kinase-1 // --- //   | PDPK1    | Cluster0002 |
| 14962710 | ENSECAT000000022417 // PELP1 // proline, glutamate and leucine rich protein 1 // --- //  | PELP1    | Cluster0002 |
| 15107234 | ENSECAT00000022985 // PGAP2 // post-GPI attachment to proteins 2 // --- // ---           | PGAP2    | Cluster0002 |
| 15022978 | ENSECAT000000024227 // PHACTR4 // phosphatase and actin regulator 4 // --- // 100070745  | PHACTR4  | Cluster0002 |
| 15004990 | ENSECAT00000015762 // PHF11 // PHD finger protein 11 // --- // ---                       | PHF11    | Cluster0002 |
| 15086809 | XM_001492226 // PI4KB // phosphatidylinositol 4-kinase, catalytic, beta // --- // 10005  | PI4KB    | Cluster0002 |
| 14946132 | XM_001496440 // PIAS1 // protein inhibitor of activated STAT, 1 // --- // 100052741 ///  | PIAS1    | Cluster0002 |
| 15103566 | ENSECAT000000020105 // PIAS4 // protein inhibitor of activated STAT, 4 // --- // 1000613 | PIAS4    | Cluster0002 |
| 15085745 | ENSECAT000000004685 // PIGM // phosphatidylinositol glycan anchor biosynthesis, class M  | PIGM     | Cluster0002 |
| 14967293 | XM_001504143 // PIGS // phosphatidylinositol glycan anchor biosynthesis, class S // ---  | PIGS     | Cluster0002 |
| 15038166 | XM_001503260 // PIGT // phosphatidylinositol glycan anchor biosynthesis, class T // ---  | PIGT     | Cluster0002 |
| 15039937 | XM_001501271 // PIGU // phosphatidylinositol glycan anchor biosynthesis, class U // ---  | PIGU     | Cluster0002 |
| 15064847 | XM_001498913 // PLA2G15 // phospholipase A2, group XV // --- // 100053908 /// ENSECAT00  | PLA2G15  | Cluster0002 |
| 15118353 | ENSECAT000000009632 // PLBD2 // phospholipase B domain containing 2 // --- // 100056432  | PLBD2    | Cluster0002 |
| 14946322 | EF397514 // PLEKHO2 // pleckstrin homology domain containing, family O member 2 // ---   | PLEKHO2  | Cluster0002 |
| 14945899 | ENSECAT000000006078 // PML // promyelocytic leukemia // --- // 100062744 /// XM_00149324 | PML      | Cluster0002 |
| 14955234 | XM_001917356 // PNKP // polynucleotide kinase 3 -phosphatase // --- // 100052218 /// EN  | PNKP     | Cluster0002 |
| 14984074 | XM_001504673 // POC5 // POC5 centriolar protein homolog (Chlamydomonas) // --- // 10007  | POC5     | Cluster0002 |
| 14967254 | ENSECAT00000014913 // POLDIP2 // polymerase (DNA-directed), delta interacting protein 2  | POLDIP2  | Cluster0002 |
| 15061351 | ENSECAT00000019601 // POLDIP3 // polymerase (DNA-directed), delta interacting protein 3  | POLDIP3  | Cluster0002 |
| 14974010 | XM_001491904 // PPP1CA // protein phosphatase 1, catalytic subunit, alpha isozyme // --  | PPP1CA   | Cluster0002 |
| 15046204 | ENSECAT000000020879 // PPP2R5C // protein phosphatase 2, regulatory subunit B, gamma //  | PPP2R5C  | Cluster0002 |
| 14976018 | XM_001501848 // PPP4C // protein phosphatase 4, catalytic subunit // --- // 100064118 /  | PPP4C    | Cluster0002 |
| 14950783 | XM_001500787 // PPP5C // protein phosphatase 5, catalytic subunit // --- // 100071104 /  | PPP5C    | Cluster0002 |
| 15049219 | XM_001488863 // PRPF4 // PRP4 pre-mRNA processing factor 4 homolog (yeast) // --- // 10  | PRPF4    | Cluster0002 |
| 15045145 | ENSECAT000000004545 // PSEN1 // presenilin 1 // --- // ---                               | PSEN1    | Cluster0002 |
| 14950066 | XM_001498409 // PSMC4 // proteasome (prosome, macropain) 26S subunit, ATPase, 4 // ---   | PSMC4    | Cluster0002 |
| 14940223 | ENSECAT00000017709 // PSME1 // proteasome (prosome, macropain) activator subunit 1 (PA2  | PSME1    | Cluster0002 |
| 15080173 | ENSECAT000000009183 // PTPN12 // protein tyrosine phosphatase, non-receptor type 12 // - | PTPN12   | Cluster0002 |
| 15006122 | XM_001504923 // PTPN18 // protein tyrosine phosphatase, non-receptor type 18 (brain-der  | PTPN18   | Cluster0002 |
| 14941039 | ENSECAT000000010165 // PTPRE // protein tyrosine phosphatase, receptor type, E // --- // | PTPRE    | Cluster0002 |
| 15058834 | ENSECAT000000024435 // PWP1 // PWP1 homolog (S. cerevisiae) // --- // ---                | PWP1     | Cluster0002 |
| 15054399 | ENSECAT000000007027 // PWP2 // PWP2 periodic tryptophan protein homolog (yeast) // --- / | PWP2     | Cluster0002 |
| 15108354 | ENSECAT000000007668 // QSER1 // glutamine and serine rich 1 // --- // 100057700 /// XM_0 | QSER1    | Cluster0002 |
| 15102967 | ENSECAT000000005429 // R3HDM2 // R3H domain containing 2 // --- // 100053125             | R3HDM2   | Cluster0002 |
| 15006508 | XM_001489470 // RAB3GAP1 // RAB3 GTPase activating protein subunit 1 (catalytic) // ---  | RAB3GAP1 | Cluster0002 |
| 14987684 | ENSECAT000000011814 // RAD17 // RAD17 homolog (S. pombe) // --- // 100065769 /// XM_0015 | RAD17    | Cluster0002 |
| 15049099 | XM_001915992 // RAD23B // RAD23 homolog B (S. cerevisiae) // --- // 100059968 /// ENSEC  | RAD23B   | Cluster0002 |

|          |                                                                                           |          |             |
|----------|-------------------------------------------------------------------------------------------|----------|-------------|
| 15070391 | ENSECAT00000022636 // RAP1GDS1 // RAP1, GTP-GDP dissociation stimulator 1 // --- // ---   | RAP1GDS1 | Cluster0002 |
| 15052970 | ENSECAT00000020778 // RAPGEF1 // Rap guanine nucleotide exchange factor (GEF) 1 // ---    | RAPGEF1  | Cluster0002 |
| 14948052 | XM_001494818 // RBM23 // RNA binding motif protein 23 // --- // 100052786 /// ENSECAT00   | RBM23    | Cluster0002 |
| 14955698 | ENSECAT00000024790 // RDH13 // retinol dehydrogenase 13 (all-trans/9-cis) // --- // 100   | RDH13    | Cluster0002 |
| 15048507 | ENSECAT00000010431 // RGP1 // RGP1 retrograde golgi transport homolog (S. cerevisiae) /   | RGP1     | Cluster0002 |
| 15039165 | ENSECAT00000016226 // RIN2 // Ras and Rab interactor 2 // --- // ---                      | RIN2     | Cluster0002 |
| 14998480 | ENSECAT00000025072 // RNF13 // ring finger protein 13 // --- // 100058094 /// XM_001491   | RNF13    | Cluster0002 |
| 15021860 | ENSECAT00000005223 // RNF220 // ring finger protein 220 // --- // 100052861 /// XM_0019   | RNF220   | Cluster0002 |
| 15098634 | XM_001492149 // RNF25 // ring finger protein 25 // --- // 100058790 /// ENSECAT000000009  | RNF25    | Cluster0002 |
| 14940229 | XM_001490663 // RNF31 // ring finger protein 31 // --- // 100051661 /// ENSECAT000000015  | RNF31    | Cluster0002 |
| 14966668 | ENSECAT00000018593 // RNFT1 // ring finger protein, transmembrane 1 // --- // 100072218   | RNFT1    | Cluster0002 |
| 14977083 | ENSECAT00000019560 // ROGD1 // rogd1 homolog (Drosophila) // --- // ---                   | ROGDI    | Cluster0002 |
| 15120210 | AY246726 // RPL17 // ribosomal protein L17 // --- // 100034005 /// XM_003365546 /// RPL1  | RPL17    | Cluster0002 |
| 14954972 | NM_001195513 // RPL18 // ribosomal protein L18 // --- // 100051091 /// ENSECAT000000234   | RPL18    | Cluster0002 |
| 15050562 | AF508309 // RPL7A // ribosomal protein L7a // --- // 100033932                            | RPL7A    | Cluster0002 |
| 15122937 | ENSECAT00000008654 // RPL8 // ribosomal protein L8 // --- // ---                          | RPL8     | Cluster0002 |
| 14946059 | XM_001495725 // RPLP1 // ribosomal protein, large, P1 // --- // 100052525 /// ENSECAT00   | RPLP1    | Cluster0002 |
| 14971844 | NM_001085436 // RPLP2 // ribosomal protein, large, P2 // --- // 100034001                 | RPLP2    | Cluster0002 |
| 15097590 | NM_001163890 // RPS26 // ribosomal protein S26 // --- // 100034009 /// ENSECAT000000260   | RPS26    | Cluster0002 |
| 14996139 | XM_001494739 // RRP9 // ribosomal RNA processing 9, small subunit (SSU) processome comp   | RRP9     | Cluster0002 |
| 15087508 | ENSECAT00000008155 // RSBN1 // round spermatid basic protein 1 // --- // ---              | RSBN1    | Cluster0002 |
| 14976858 | ENSECAT00000027038 // RSL1D1 // ribosomal L1 domain containing 1 // --- // ---            | RSL1D1   | Cluster0002 |
| 15118784 | ENSECAT00000014736 // RSRC2 // arginine/serine-rich coiled-coil 2 // --- // 100058861     | RSRC2    | Cluster0002 |
| 14943204 | ENSECAT00000011962 // RUFY2 // RUN and FYVE domain containing 2 // --- // 100063098 ///   | RUFY2    | Cluster0002 |
| 14965557 | ENSECAT00000007839 // RUNDC1 // RUN domain containing 1 // --- // 100065701 /// XM_0014   | RUNDC1   | Cluster0002 |
| 15086701 | NM_001163867 // S100A10 // S100 calcium binding protein A10 // --- // 100034012 /// ENS   | S100A10  | Cluster0002 |
| 15006176 | XM_003363264 // SAP130 // Sin3A-associated protein, 130kDa // --- // 100067466 /// ENSE   | SAP130   | Cluster0002 |
| 14970973 | XM_001490530 // SCYL1 // SCY1-like 1 (S. cerevisiae) // --- // 100057036 /// ENSECAT000   | SCYL1    | Cluster0002 |
| 15089419 | ENSECAT00000023819 // SCYL3 // SCY1-like 3 (S. cerevisiae) // --- // ---                  | SCYL3    | Cluster0002 |
| 15123517 | ENSECAT00000016077 // SDCBP // syndecan binding protein (syntenin) // --- // 100052836    | SDCBP    | Cluster0002 |
| 15117681 | ENSECAT00000021479 // SEC14L2 // SEC14-like 2 (S. cerevisiae) // --- // 100058707 /// X   | SEC14L2  | Cluster0002 |
| 14944855 | XM_001498879 // SEMA4B // sema domain, immunoglobulin domain (Ig), transmembrane domain   | SEMA4B   | Cluster0002 |
| 15101621 | ENSECAT00000011103 // SENP1 // SUMO1/sentrin specific peptidase 1 // --- // 100056855 /// | SENP1    | Cluster0002 |
| 14950873 | NM_001170422 // SEPW1 // selenoprotein W, 1 // --- // 100050195 /// ENSECAT00000006991    | SEPW1    | Cluster0002 |
| 14977517 | NM_001170424 // SEPX1 // methionine sulfoxide reductase B1 // --- // 100068001 /// ENSE   | SEPX1    | Cluster0002 |
| 15029572 | XM_001488303 // SERPINB9 // serpin peptidase inhibitor, clade B (ovalbumin), member 9 /   | SERPINB9 | Cluster0002 |
| 14979164 | ENSECAT00000015927 // SETD1A // SET domain containing 1A // --- // 100063523 /// XM_001   | SETD1A   | Cluster0002 |
| 14973574 | XM_001490608 // SF1 // splicing factor 1 // --- // 100050420 /// ENSECAT00000026475 ///   | SF1      | Cluster0002 |
| 15113729 | XM_001498224 // SF3A1 // splicing factor 3a, subunit 1, 120kDa // --- // 100058749 ///    | SF3A1    | Cluster0002 |
| 15103356 | ENSECAT00000029107 // SF3A2 // splicing factor 3a, subunit 2, 66kDa // --- // ---         | SF3A2    | Cluster0002 |
| 15052683 | ENSECAT00000019146 // SH2D3C // SH2 domain containing 3C // --- // 100070448 /// XM_001   | SH2D3C   | Cluster0002 |
| 15023177 | NM_001242455 // SH3BGRL3 // SH3 domain binding glutamic acid-rich protein like 3 // ---   | SH3BGRL3 | Cluster0002 |
| 15072660 | ENSECAT00000023523 // SH3BP2 // SH3-domain binding protein 2 // --- // 100051380 /// XM   | SH3BP2   | Cluster0002 |
| 15093066 | XM_003365100 // SH3GLB1 // SH3-domain GRB2-like endophilin B1 // --- // 100052441 /// X   | SH3GLB1  | Cluster0002 |
| 15086393 | XM_001497785 // SHC1 // SHC (Src homology 2 domain containing) transforming protein 1 /   | SHC1     | Cluster0002 |
| 15104618 | XM_001502574 // SIDT2 // SID1 transmembrane family, member 2 // --- // 100062652 /// EN   | SIDT2    | Cluster0002 |
| 15032560 | ENSECAT000000008817 // SIN3B // SIN3 transcription regulator homolog B (yeast) // --- //  | SIN3B    | Cluster0002 |
| 14971044 | ENSECAT00000013717 // SIPA1 // signal-induced proliferation-associated 1 // --- // ---    | SIPA1    | Cluster0002 |
| 15133955 | ENSECAT00000014359 // SLC10A3 // solute carrier family 10 (sodium/bile acid cotransport   | SLC10A3  | Cluster0002 |
| 15055625 | XM_001489728 // SLC19A1 // solute carrier family 19 (folate transporter), member 1 // -   | SLC19A1  | Cluster0002 |
| 15035773 | XM_001499617 // SLC1A3 // solute carrier family 1 (glial high affinity glutamate transp   | SLC1A3   | Cluster0002 |
| 15049772 | XM_001500215 // SLC2A8 // solute carrier family 2 (facilitated glucose transporter), me   | SLC2A8   | Cluster0002 |
| 15031770 | XM_001497724 // SLC35B2 // solute carrier family 35, member B2 // --- // 100067750 ///    | SLC35B2  | Cluster0002 |
| 15044573 | ENSECAT00000005976 // SLC38A6 // solute carrier family 38, member 6 // --- // 100060809   | SLC38A6  | Cluster0002 |

|          |                                                                                          |          |             |
|----------|------------------------------------------------------------------------------------------|----------|-------------|
| 14958923 | ENSECAT00000023379 // SLC39A11 // solute carrier family 39 (metal ion transporter), mem  | SLC39A11 | Cluster0002 |
| 14970579 | XM_001495061 // SLC3A2 // solute carrier family 3 (activators of dibasic and neutral am  | SLC3A2   | Cluster0002 |
| 14967281 | ENSECAT00000006927 // SLC46A1 // solute carrier family 46 (folate transporter), member   | SLC46A1  | Cluster0002 |
| 15113466 | XM_001489987 // SLC7A4 // solute carrier family 7 (orphan transporter), member 4 // ---  | SLC7A4   | Cluster0002 |
| 15116515 | AB076030 // SMAD4 // SMAD family member 4 // --- // 100033846                            | SMAD4    | Cluster0002 |
| 14989567 | ENSECAT00000014967 // SMEK2 // SMEK homolog 2, suppressor of mek1 (Dictyostelium) // --  | SMEK2    | Cluster0002 |
| 15084979 | XM_003364947 // SMG7 // smg-7 homolog, nonsense mediated mRNA decay factor (C. elegans)  | SMG7     | Cluster0002 |
| 14994004 | XM_001502317 // SNX17 // sorting nexin 17 // --- // 100055239 // XM_003363022 // SNX17   | SNX17    | Cluster0002 |
| 14974851 | ENSECAT000000025400 // SNX8 // sorting nexin 8 // --- // 100059657 // XM_001492178 // S  | SNX8     | Cluster0002 |
| 15009979 | XM_001495258 // SP3 // Sp3 transcription factor // --- // 100064317 // ENSECAT000000014  | SP3      | Cluster0002 |
| 15040760 | ENSECAT00000007222 // SPATA2 // spermatogenesis associated 2 // --- // 100071437 // XM   | SPATA2   | Cluster0002 |
| 15008014 | ENSECAT00000019755 // SPATS2L // spermatogenesis associated, serine-rich 2-like // ---   | SPATS2L  | Cluster0002 |
| 15111862 | ENSECAT00000007304 // SPCS2 // signal peptidase complex subunit 2 homolog (S. cerevisia  | SPCS2    | Cluster0002 |
| 15013088 | XM_001502881 // SPICE1 // spindle and centriole associated protein 1 // --- // 10006133  | SPICE1   | Cluster0002 |
| 14989284 | XM_001494344 // SPRED2 // sprouty-related, EVH1 domain containing 2 // --- // 100062947  | SPRED2   | Cluster0002 |
| 15023327 | ENSECAT000000028857 // SRRM1 // serine/arginine repetitive matrix 1 // --- // ---        | SRRM1    | Cluster0002 |
| 14975297 | ENSECAT00000013256 // SRRT // serrate RNA effector molecule homolog (Arabidopsis) // --  | SRRT     | Cluster0002 |
| 15063416 | XM_001498179 // STAM // signal transducing adaptor molecule (SH3 domain and ITAM motif)  | STAM     | Cluster0002 |
| 15009255 | ENSECAT000000022963 // STAM2 // signal transducing adaptor molecule (SH3 domain and ITAM | STAM2    | Cluster0002 |
| 14965942 | ENSECAT000000013079 // STARD3 // StAR-related lipid transfer (START) domain containing 3 | STARD3   | Cluster0002 |
| 15128400 | XM_001496620 // STARD8 // StAR-related lipid transfer (START) domain containing 8 // --  | STARD8   | Cluster0002 |
| 14947114 | ENSECAT000000024489 // STARD9 // StAR-related lipid transfer (START) domain containing 9 | STARD9   | Cluster0002 |
| 14960057 | XM_003362556 // STAT-3 // STAT-3 protein // --- // 100034011 // ENSECAT00000018255 //    | STAT-3   | Cluster0002 |
| 15102927 | ENSECAT000000009359 // STAT6 // signal transducer and activator of transcription 6, inte | STAT6    | Cluster0002 |
| 14957974 | ENSECAT00000018859 // STRA13 // stimulated by retinoic acid 13 homolog (mouse) // --- /  | STRA13   | Cluster0002 |
| 15048883 | XM_001504042 // STX17 // syntaxin 17 // --- // 100054797 // ENSECAT00000015963 // STX1   | STX17    | Cluster0002 |
| 14950034 | XM_001915937 // SUPT5H // suppressor of Ty 5 homolog (S. cerevisiae) // --- // 10006451  | SUPT5H   | Cluster0002 |
| 14964298 | ENSECAT000000023421 // SYNGR2 // synaptogyrin 2 // --- // ---                            | SYNGR2   | Cluster0002 |
| 15047158 | NM_001242552 // SYNJ2BP // synaptojanin 2 binding protein // --- // 100049833 // ENSEC   | SYNJ2BP  | Cluster0002 |
| 15131220 | ENSECAT000000018502 // TAB3 // TGF-beta activated kinase 1/MAP3K7 binding protein 3 // - | TAB3     | Cluster0002 |
| 14978382 | ENSECAT00000009086 // TAF6 // TAF6 RNA polymerase II, TATA box binding protein (TBP)-as  | TAF6     | Cluster0002 |
| 14962091 | ENSECAT000000006735 // TAOK1 // TAO kinase 1 // --- // 100059705 // XM_001504208 // TAO  | TAOK1    | Cluster0002 |
| 15067996 | XM_001498618 // TAPT1 // transmembrane anterior posterior transformation 1 // --- // 10  | TAPT1    | Cluster0002 |
| 15050067 | XM_001500358 // TBC1D13 // TBC1 domain family, member 13 // --- // 100070184 // ENSECA   | TBC1D13  | Cluster0002 |
| 15037108 | XM_003363867 // TBC1D20 // TBC1 domain family, member 20 // --- // 100067965 // ENSECA   | TBC1D20  | Cluster0002 |
| 15127924 | ENSECAT000000025175 // TBC1D25 // TBC1 domain family, member 25 // --- // 100061931 //   | TBC1D25  | Cluster0002 |
| 14978775 | ENSECAT000000016510 // TBL2 // transducin (beta)-like 2 // --- // 100059856 // XM_00150  | TBL2     | Cluster0002 |
| 15023403 | NM_001252407 // TCEB3 // transcription elongation factor B (SIII), polypeptide 3 (110kD  | TCEB3    | Cluster0002 |
| 15061332 | ENSECAT000000007527 // TCF20 // transcription factor 20 (AR1) // --- // 100056129 // XM  | TCF20    | Cluster0002 |
| 14941662 | ENSECAT000000025956 // TCF7L2 // transcription factor 7-like 2 (T-cell specific, HMG-box | TCF7L2   | Cluster0002 |
| 14971525 | ENSECAT000000011204 // TCIRG1 // T-cell, immune regulator 1, ATPase, H+ transporting, ty | TCIRG1   | Cluster0002 |
| 15110653 | ENSECAT000000020391 // TECR // trans-2,3-enoyl-CoA reductase // --- // 100065024 // XM_  | TECR     | Cluster0002 |
| 15048470 | XM_001497920 // TESK1 // testis-specific kinase 1 // --- // 100068022 // ENSECAT0000000  | TESK1    | Cluster0002 |
| 15016347 | XM_001496148 // TESK2 // testis-specific kinase 2 // --- // 100052478 // ENSECAT0000000  | TESK2    | Cluster0002 |
| 15026516 | XM_001503217 // TET2 // tet methylcytosine dioxygenase 2 // --- // 100073065 // ENSECA   | TET2     | Cluster0002 |
| 14992457 | XM_001917114 // TET3 // tet methylcytosine dioxygenase 3 // --- // 100057820 // ENSECA   | TET3     | Cluster0002 |
| 15051587 | XM_001504032 // TEX10 // testis expressed 10 // --- // 100063401 // ENSECAT00000019581   | TEX10    | Cluster0002 |
| 15031547 | ENSECAT000000021087 // TFEB // transcription factor EB // --- // 100066433 // XM_001496  | TFEB     | Cluster0002 |
| 14954224 | ENSECAT000000012048 // TGFB1 // transforming growth factor, beta 1 // --- // 100033900 / | TGFB1    | Cluster0002 |
| 15126975 | NM_001081771 // TLR7 // toll-like receptor 7 // --- // 791248 // ENSECAT00000007908 //   | TLR7     | Cluster0002 |
| 15126979 | NM_001111301 // TLR8 // toll-like receptor 8 // --- // 100054367 // ENSECAT00000009327   | TLR8     | Cluster0002 |
| 14948312 | XM_001490013 // TM9SF1 // transmembrane 9 superfamily member 1 // --- // 100051449 //    | TM9SF1   | Cluster0002 |
| 14985681 | XM_001504162 // TMCO6 // transmembrane and coiled-coil domains 6 // --- // 100061843 //  | TMCO6    | Cluster0002 |
| 14964697 | ENSECAT00000006437 // TMEM104 // transmembrane protein 104 // --- // ---                 | TMEM104  | Cluster0002 |

|          |                                                                                          |          |             |
|----------|------------------------------------------------------------------------------------------|----------|-------------|
| 14983853 | ENSECAT00000027090 // TMEM161B // transmembrane protein 161B // --- // 100073241 /// XM  | TMEM161B | Cluster0002 |
| 15072812 | XM_001488221 // TMEM175 // transmembrane protein 175 // --- // 100051913 /// ENSECAT000  | TMEM175  | Cluster0002 |
| 14942025 | ENSECAT00000015514 // TMEM180 // transmembrane protein 180 // --- // 100059957 /// XM_0  | TMEM180  | Cluster0002 |
| 15073923 | ENSECAT00000008973 // TMEM183A // transmembrane protein 183A // --- // 100065104 /// XM  | TMEM183A | Cluster0002 |
| 15023303 | ENSECAT000000023814 // TMEM50A // transmembrane protein 50A // --- // ---                | TMEM50A  | Cluster0002 |
| 15021734 | ENSECAT000000025112 // TMEM69 // transmembrane protein 69 // --- // 100065125 /// XM_001 | TMEM69   | Cluster0002 |
| 14961946 | ENSECAT00000013503 // TNFAIP1 // tumor necrosis factor, alpha-induced protein 1 (endoth  | TNFAIP1  | Cluster0002 |
| 15099945 | ENSECAT00000017432 // TNFRSF1A // tumor necrosis factor receptor superfamily, member 1A  | TNFRSF1A | Cluster0002 |
| 15105879 | ENSECAT00000014998 // TNPO2 // transportin 2 // --- // 100063482 /// XM_001504888 // TN  | TNPO2    | Cluster0002 |
| 15059199 | ENSECAT00000010386 // TNRC6B // trinucleotide repeat containing 6B // --- // ---         | TNRC6B   | Cluster0002 |
| 15021768 | ENSECAT00000024892 // TOE1 // target of EGR1, member 1 (nuclear) // --- // 100052538 //  | TOE1     | Cluster0002 |
| 15058884 | XM_003364290 // TOM1 // target of myb1 (chicken) // --- // 100054292 /// ENSECAT00000001 | TOM1     | Cluster0002 |
| 14968520 | ENSECAT000000008309 // TP53 // tumor protein p53 // --- // 100062044 /// NM_001202405 // | TP53     | Cluster0002 |
| 15046331 | XM_001490000 // TRAF3 // TNF receptor-associated factor 3 // --- // 100055110 /// ENSEC  | TRAF3    | Cluster0002 |
| 15112116 | ENSECAT00000006616 // TRIM21 // tripartite motif containing 21 // --- // 100066782 ///   | TRIM21   | Cluster0002 |
| 15079112 | XM_001496985 // TRIM24 // tripartite motif containing 24 // --- // 100066810 /// ENSECA  | TRIM24   | Cluster0002 |
| 15030361 | ENSECAT00000017994 // TRIM26 // tripartite motif containing 26 // --- // 100051726 ///   | TRIM26   | Cluster0002 |
| 15030268 | XM_001492536 // TRIM27 // tripartite motif containing 27 // --- // 100060192 /// ENSECA  | TRIM27   | Cluster0002 |
| 14975351 | NM_001257087 // TRIM56 // tripartite motif containing 56 // --- // 100060136 /// ENSECA  | TRIM56   | Cluster0002 |
| 14998490 | ENSECAT000000026741 // TSC22D2 // TSC22 domain family, member 2 // --- // ---            | TSC22D2  | Cluster0002 |
| 15047787 | ENSECAT00000013808 // TTC7B // tetratricopeptide repeat domain 7B // --- // 100062817 // | TTC7B    | Cluster0002 |
| 15040288 | XM_001502393 // TTI1 // TEO2 interacting protein 1 // --- // 100055499 /// ENSECAT0000   | TTI1     | Cluster0002 |
| 15094145 | XM_001492221 // TTLL4 // tubulin tyrosine ligase-like family, member 4 // --- // 100055  | TTLL4    | Cluster0002 |
| 15038091 | ENSECAT000000016197 // TTPAL // tocopherol (alpha) transfer protein-like // --- // 10005 | TTPAL    | Cluster0002 |
| 15096839 | XM_001504181 // TUBA1C // tubulin, alpha 1c // --- // 100051901 /// ENSECAT00000009703   | TUBA1C   | Cluster0002 |
| 15113972 | XM_001488340 // TUBA3D // tubulin, alpha 3d // --- // 100052388 /// ENSECAT00000015106   | TUBA3D   | Cluster0002 |
| 15098777 | XM_001491910 // TUBA4A // tubulin, alpha 4a // --- // 100059249 /// ENSECAT00000015274   | TUBA4A   | Cluster0002 |
| 14947054 | XM_001503141 // TUBGCP4 // tubulin, gamma complex associated protein 4 // --- // 100056  | TUBGCP4  | Cluster0002 |
| 14951839 | XM_001496109 // U2AF2 // U2 small nuclear RNA auxiliary factor 2 // --- // 100050729 /// | U2AF2    | Cluster0002 |
| 14995366 | XM_001498639 // UBA3 // ubiquitin-like modifier activating enzyme 3 // --- // 100053395  | UBA3     | Cluster0002 |
| 15067117 | XM_001497368 // UBA6 // ubiquitin-like modifier activating enzyme 6 // --- // 100067272  | UBA6     | Cluster0002 |
| 14996357 | XM_001497081 // UBA7 // ubiquitin-like modifier activating enzyme 7 // --- // 100052809  | UBA7     | Cluster0002 |
| 15042406 | XM_001499590 // UBAP1 // ubiquitin associated protein 1 // --- // 100053997 /// ENSECAT  | UBAP1    | Cluster0002 |
| 15091286 | ENSECAT000000006859 // UBAP2L // ubiquitin associated protein 2-like // --- // 100056822 | UBAP2L   | Cluster0002 |
| 15129707 | ENSECAT00000020216 // UBE2A // ubiquitin-conjugating enzyme E2A // --- // 100058679 ///  | UBE2A    | Cluster0002 |
| 15040763 | ENSECAT00000012363 // UBE2V1 // ubiquitin-conjugating enzyme E2 variant 1 // --- // ---  | UBE2V1   | Cluster0002 |
| 14981592 | ENSECAT00000012064 // UIMC1 // ubiquitin interaction motif containing 1 // --- // 10005  | UIMC1    | Cluster0002 |
| 14974095 | XM_001916968 // UNC93B1 // unc-93 homolog B1 (C. elegans) // --- // 100059773 /// ENSEC  | UNC93B1  | Cluster0002 |
| 14958804 | XM_001496857 // USH1G // Usher syndrome 1G (autosomal recessive) // --- // 100052352 //  | USH1G    | Cluster0002 |
| 15085523 | XM_001503830 // USP21 // ubiquitin specific peptidase 21 // --- // 100066197 /// XM_001  | USP21    | Cluster0002 |
| 14969315 | XM_001488603 // USP22 // ubiquitin specific peptidase 22 // --- // 100053238 /// ENSECA  | USP22    | Cluster0002 |
| 14958266 | XM_001491130 // USP36 // ubiquitin specific peptidase 36 // --- // 100057557 /// ENSECA  | USP36    | Cluster0002 |
| 15002716 | XM_001493357 // USPL1 // ubiquitin specific peptidase like 1 // --- // 100062086 /// EN  | USPL1    | Cluster0002 |
| 15058197 | ENSECAT000000004005 // VEZT // vezatin, adherens junctions transmembrane protein // ---  | VEZT     | Cluster0002 |
| 14961454 | XM_001503742 // VMP1 // vacuole membrane protein 1 // --- // 100057406 /// ENSECAT000000 | VMP1     | Cluster0002 |
| 15126737 | ENSECAT000000029068 // VPS25 // vacuolar protein sorting 25 homolog (S. cerevisiae) // - | VPS25    | Cluster0002 |
| 14938922 | ENSECAT000000006741 // VPS39 // vacuolar protein sorting 39 homolog (S. cerevisiae) // - | VPS39    | Cluster0002 |
| 15063031 | XM_001495136 // WAC // WW domain containing adaptor with coiled-coil // --- // 10006415  | WAC      | Cluster0002 |
| 15100665 | ENSECAT000000008643 // WBP11 // WW domain binding protein 11 // --- // 100063867         | WBP11    | Cluster0002 |
| 15107707 | XM_001504915 // WEE1 // WEE1 homolog (S. pombe) // --- // 100071182 /// ENSECAT000000022 | WEE1     | Cluster0002 |
| 14944698 | XM_001498201 // WHAMM // WAS protein homolog associated with actin, golgi membranes and  | WHAMM    | Cluster0002 |
| 15068409 | ENSECAT00000010781 // WHSC2 // Wolf-Hirschhorn syndrome candidate 2 // --- // ---        | WHSC2    | Cluster0002 |
| 14978100 | ENSECAT000000023722 // WIPI2 // WD repeat domain, phosphoinositide interacting 2 // ---  | WIPI2    | Cluster0002 |
| 14973869 | NM_001110210 // YIF1A // Yip1 interacting factor homolog A (S. cerevisiae) // --- // 10  | YIF1A    | Cluster0002 |



|          |                                                                                           |         |             |
|----------|-------------------------------------------------------------------------------------------|---------|-------------|
| 15120723 | ENSECAT00000002752 // ZADH2 // zinc binding alcohol dehydrogenase domain containing 2 /   | ZADH2   | Cluster0002 |
| 15075498 | XM_001501770 // ZBTB2 // zinc finger and BTB domain containing 2 // --- // 100060294 //   | ZBTB2   | Cluster0002 |
| 15129726 | ENSECAT00000007209 // ZBTB33 // zinc finger and BTB domain containing 33 // --- // 1000   | ZBTB33  | Cluster0002 |
| 15104363 | ENSECAT00000000381 // ZC3H12C // zinc finger CCCH-type containing 12C // --- // 1000700   | ZC3H12C | Cluster0002 |
| 15045541 | ENSECAT000000014389 // ZC3H14 // zinc finger CCCH-type containing 14 // --- // ---        | ZC3H14  | Cluster0002 |
| 15082783 | ENSECAT000000019165 // ZC3HC1 // zinc finger, C3HC-type containing 1 // --- // 100057013  | ZC3HC1  | Cluster0002 |
| 14942391 | ENSECAT000000010893 // ZDHHC16 // zinc finger, DHHC-type containing 16 // --- // 1000610  | ZDHHC16 | Cluster0002 |
| 14998879 | ENSECAT000000022971 // ZFYVE20 // zinc finger, FYVE domain containing 20 // --- // 10005  | ZFYVE20 | Cluster0002 |
| 15076970 | ENSECAT000000026848 // ZMIZ2 // zinc finger, MIZ-type containing 2 // --- // 100051958 /  | ZMIZ2   | Cluster0002 |
| 15098625 | ENSECAT000000018824 // ZNF142 // zinc finger protein 142 // --- // 100055767 /// XM_0014  | ZNF142  | Cluster0002 |
| 15107691 | XM_001504913 // ZNF143 // zinc finger protein 143 // --- // 100055723 /// ENSECAT000000   | ZNF143  | Cluster0002 |
| 14951962 | ENSECAT000000022753 // ZNF264 // zinc finger protein 264 // --- // ---                    | ZNF264  | Cluster0002 |
| 15133309 | ENSECAT000000018945 // ZNF280C // zinc finger protein 280C // --- // 100058803            | ZNF280C | Cluster0002 |
| 14937879 | ENSECAT0000000088641 // ZNF280D // zinc finger protein 280D // --- // 100054593           | ZNF280D | Cluster0002 |
| 15055462 | ENSECAT000000013536 // ZNF295 // zinc finger protein 295 // --- // 100058234 /// XM_0014  | ZNF295  | Cluster0002 |
| 15100060 | XM_003365164 // ZNF384 // zinc finger protein 384 // --- // 100059879 /// ENSECAT000000   | ZNF384  | Cluster0002 |
| 15045207 | XM_001490028 // ZNF410 // zinc finger protein 410 // --- // 100050679 /// ENSECAT000000   | ZNF410  | Cluster0002 |
| 14952089 | ENSECAT000000017488 // ZNF446 // zinc finger protein 446 // --- // ---                    | ZNF446  | Cluster0002 |
| 14951297 | ENSECAT000000025016 // ZNF473 // zinc finger protein 473 // --- // 100056907 /// XM_0014  | ZNF473  | Cluster0002 |
| 14979141 | XM_001500835 // ZNF646 // zinc finger protein 646 // --- // 100063391 /// ENSECAT000000   | ZNF646  | Cluster0002 |
| 14975864 | ENSECAT000000004478 // ZNF689 // zinc finger protein 689 // --- // ---                    | ZNF689  | Cluster0002 |
| 15130030 | XM_001494693 // ZNF75D // zinc finger protein 75D // --- // 100063485 /// ENSECAT000000   | ZNF75D  | Cluster0002 |
| 15006103 | XM_001504106 // ZNF828 // chromosome alignment maintaining phosphoprotein 1 // --- // 1   | ZNF828  | Cluster0002 |
| 14949709 | XM_001495128 // ZNF829 // zinc finger protein 829 // --- // 100061841 /// ENSECAT000000   | ZNF829  | Cluster0002 |
| 15109678 | XM_001502053 // ZW10 // ZW10, kinetochore associated, homolog (Drosophila) // --- // 10   | ZW10    | Cluster0002 |
| 14961638 | ENSECAT000000008813 // AATF // apoptosis antagonizing transcription factor // --- // 100  | AATF    | Cluster0003 |
| 14958998 | ENSECAT000000007910 // ABCA6 // ATP-binding cassette, sub-family A (ABC1), member 6 // -  | ABCA6   | Cluster0003 |
| 14959027 | ENSECAT000000025043 // ABCA9 // ATP-binding cassette, sub-family A (ABC1), member 9 // -  | ABCA9   | Cluster0003 |
| 14935005 | ENSECAT000000018939 // ABCB10 // ATP-binding cassette, sub-family B (MDR/TAP), member 10  | ABCB10  | Cluster0003 |
| 15014145 | ENSECAT000000008988 // ABCC5 // ATP-binding cassette, sub-family C (CFTR/MRP), member 5   | ABCC5   | Cluster0003 |
| 15047303 | XM_001490380 // ABCD4 // ATP-binding cassette, sub-family D (ALD), member 4 // --- // 1   | ABCD4   | Cluster0003 |
| 15066315 | DQ825759 // ABCG2 // ATP-binding cassette, sub-family G (WHITE), member 2 // --- // 100   | ABCG2   | Cluster0003 |
| 14997353 | XM_001488559 // ACAA1 // acetyl-CoA acyltransferase 1 // --- // 100050082 /// ENSECAT00   | ACAA1   | Cluster0003 |
| 14966758 | ENSECAT000000013599 // ACACA // acetyl-CoA carboxylase alpha // --- // 100071472 /// XM_  | ACACA   | Cluster0003 |
| 14998753 | XM_001489245 // ACAD9 // acyl-CoA dehydrogenase family, member 9 // --- // 100054922 //   | ACAD9   | Cluster0003 |
| 15072515 | ENSECAT000000009087 // ACOX3 // acyl-CoA oxidase 3, pristanoyl // --- // 100056690 /// X  | ACOX3   | Cluster0003 |
| 14997992 | ENSECAT000000022354 // ACPP // acid phosphatase, prostate // --- // 100064835 /// XM_001  | ACPP    | Cluster0003 |
| 15132878 | ENSECAT000000018304 // ACSL4 // acyl-CoA synthetase long-chain family member 4 // --- //  | ACSL4   | Cluster0003 |
| 15097128 | XM_003365238 // ACVR1B // activin A receptor, type IB // --- // 100062619 /// ENSECAT00   | ACVR1B  | Cluster0003 |
| 15019599 | ENSECAT000000015968 // ADAM28 // ADAM metalloproteinase domain 28 // --- // ---           | ADAM28  | Cluster0003 |
| 14967087 | ENSECAT000000016351 // ADAP2 // ArfGAP with dual PH domains 2 // --- // 100058484 /// XM  | ADAP2   | Cluster0003 |
| 15092694 | NM_001110308 // AGL // amylo-alpha-1, 6-glucosidase, 4-alpha-glucanotransferase // ---    | AGL     | Cluster0003 |
| 15054367 | ENSECAT000000024640 // AGPAT3 // 1-acylglycerol-3-phosphate O-acyltransferase 3 // --- /  | AGPAT3  | Cluster0003 |
| 14973199 | ENSECAT000000014851 // AHNAK // AHNAK nucleoprotein // --- // ---                         | AHNAK   | Cluster0003 |
| 14952626 | XM_001915854 // AIM1 // absent in melanoma 1 // --- // 100066371 /// ENSECAT000000015934  | AIM1    | Cluster0003 |
| 14945047 | ENSECAT000000009990 // AKAP13 // A kinase (PRKA) anchor protein 13 // --- // 100070242 /  | AKAP13  | Cluster0003 |
| 15077413 | ENSECAT000000022231 // AKAP9 // A kinase (PRKA) anchor protein (yotiao) 9 // --- // 1000  | AKAP9   | Cluster0003 |
| 15048857 | ENSECAT000000005562 // ALK5 // TGF beta receptor type I // --- // 100034117 /// XM_00149  | ALK5    | Cluster0003 |
| 14985700 | NM_001204105 // ANKHD1 // ankyrin repeat and KH domain containing 1 // --- // 100072419   | ANKHD1  | Cluster0003 |
| 15077461 | XM_001915085 // ANKIB1 // ankyrin repeat and IBR domain containing 1 // --- // 10006126   | ANKIB1  | Cluster0003 |
| 15119118 | ENSECAT000000026398 // ANKLE2 // ankyrin repeat and LEM domain containing 2 // --- // 10  | ANKLE2  | Cluster0003 |
| 15010940 | ENSECAT000000009858 // ANKRD44 // ankyrin repeat domain 44 // --- // 100070473 /// ENSEC  | ANKRD44 | Cluster0003 |
| 15011051 | ENSECAT000000021847 // AOX1 // aldehyde oxidase 1 // --- // 100147243 /// ENSECAT00000002 | AOX1    | Cluster0003 |
| 14948235 | XM_001491874 // AP1G2 // adaptor-related protein complex 1, gamma 2 subunit // --- // 1   | AP1G2   | Cluster0003 |

|          |                                                                                         |          |             |
|----------|-----------------------------------------------------------------------------------------|----------|-------------|
| 14984011 | ENSECAT00000024967 // AP3B1 // adaptor-related protein complex 3, beta 1 subunit // --- | AP3B1    | Cluster0003 |
| 15063102 | ENSECAT00000024444 // APBB1IP // amyloid beta (A4) precursor protein-binding, family B, | APBB1IP  | Cluster0003 |
| 14986608 | XM_001504579 // APC // adenomatous polyposis coli // --- // 100064431 /// XM_003362839  | APC      | Cluster0003 |
| 15060677 | ENSECAT00000022563 // APLP2 // amyloid beta (A4) precursor-like protein 2 // --- // 100 | APLP2    | Cluster0003 |
| 14939315 | XM_001503643 // AQR // aquarius homolog (mouse) // --- // 100057637 /// ENSECAT00000017 | AQR      | Cluster0003 |
| 15107095 | ENSECAT00000017568 // ARAP1 // ArfGAP with RhoGAP domain, ankyrin repeat and PH domain  | ARAP1    | Cluster0003 |
| 15038345 | ENSECAT00000025931 // ARFGEF2 // ADP-ribosylation factor guanine nucleotide-exchange fa | ARFGEF2  | Cluster0003 |
| 15062004 | XM_001493210 // ARHGAP12 // Rho GTPase activating protein 12 // --- // 100055065 /// EN | ARHGAP12 | Cluster0003 |
| 14976292 | ENSECAT00000018524 // ARHGAP17 // Rho GTPase activating protein 17 // --- // 100069347  | ARHGAP17 | Cluster0003 |
| 14957489 | XM_001503227 // ARHGAP18 // Rho GTPase activating protein 18 // --- // 100073070 /// EN | ARHGAP18 | Cluster0003 |
| 15070742 | XM_001495116 // ARHGAP24 // Rho GTPase activating protein 24 // --- // 100052555 /// EN | ARHGAP24 | Cluster0003 |
| 15102991 | XM_001488847 // ARHGAP9 // Rho GTPase activating protein 9 // --- // 100050388 /// ENSE | ARHGAP9  | Cluster0003 |
| 14998207 | ENSECAT00000015368 // ARMC8 // armadillo repeat containing 8 // --- // ---              | ARMC8    | Cluster0003 |
| 15086259 | XM_001499084 // ASHL // ash1 (absent, small, or homeotic)-like (Drosophila) // --- //   | ASH1L    | Cluster0003 |
| 15057009 | ENSECAT00000014641 // ASH2L // ash2 (absent, small, or homeotic)-like (Drosophila) // - | ASH2L    | Cluster0003 |
| 15085626 | XM_001488045 // ATF6 // activating transcription factor 6 // --- // 100051169 /// ENSEC | ATF6     | Cluster0003 |
| 14998988 | ENSECAT00000024336 // ATG7 // autophagy related 7 // --- // 100051544 /// XM_001493002  | ATG7     | Cluster0003 |
| 15093930 | XM_001489038 // ATIC // 5-aminoimidazole-4-carboxamide ribonucleotide formyltransferase | ATIC     | Cluster0003 |
| 14945363 | XM_001917920 // ATP10A // ATPase, class V, type 10A // --- // 100062211 /// ENSECAT0000 | ATP10A   | Cluster0003 |
| 15004140 | ENSECAT00000015729 // ATP11A // ATPase, class VI, type 11A // --- // 100066940          | ATP11A   | Cluster0003 |
| 15133614 | ENSECAT00000006990 // ATP11C // ATPase, class VI, type 11C // --- // 100055432 /// XM_0 | ATP11C   | Cluster0003 |
| 15083820 | ENSECAT000000006583 // ATP2B4 // ATPase, Ca++ transporting, plasma membrane 4 // --- // | ATP2B4   | Cluster0003 |
| 15067593 | ENSECAT00000025132 // ATP8A1 // ATPase, aminophospholipid transporter (APLT), class I,  | ATP8A1   | Cluster0003 |
| 14938303 | XM_001499692 // ATP8B4 // ATPase, class I, type 8B, member 4 // --- // 100069998 /// EN | ATP8B4   | Cluster0003 |
| 14939304 | ENSECAT00000014987 // ATPBD4 // ATP binding domain 4 // --- // ---                      | ATPBD4   | Cluster0003 |
| 15002056 | ENSECAT00000012259 // ATR // ataxia telangiectasia and Rad3 related // --- // 100062529 | ATR      | Cluster0003 |
| 14950270 | ENSECAT00000012479 // AXL // AXL receptor tyrosine kinase // --- // 100064907 /// ENSEC | AXL      | Cluster0003 |
| 15009379 | ENSECAT00000013365 // BAZ2B // bromodomain adjacent to zinc finger domain, 2B // --- // | BAZ2B    | Cluster0003 |
| 15015251 | ENSECAT00000025291 // BBX // bobby sox homolog (Drosophila) // --- // 100061782         | BBX      | Cluster0003 |
| 15088133 | ENSECAT00000024424 // BCAR3 // breast cancer anti-estrogen resistance 3 // --- // 10005 | BCAR3    | Cluster0003 |
| 14966692 | ENSECAT00000009604 // BCAS3 // breast carcinoma amplified sequence 3 // --- // --- //   | BCAS3    | Cluster0003 |
| 14993636 | ENSECAT00000021569 // BIRC6 // baculoviral IAP repeat containing 6 // --- // 100070568  | BIRC6    | Cluster0003 |
| 15070843 | ENSECAT00000017038 // BMP2K // BMP2 inducible kinase // --- // ---                      | BMP2K    | Cluster0003 |
| 14943866 | XM_001489945 // BMS1 // BMS1 homolog, ribosome assembly protein (yeast) // --- // 10005 | BMS1     | Cluster0003 |
| 15031426 | ENSECAT00000018372 // BTBD9 // BTB (POZ) domain containing 9 // --- // 100065100 /// EN | BTBD9    | Cluster0003 |
| 14934927 | ENSECAT00000010910 // C10orf11 // chromosome 10 open reading frame 11 // --- // ---     | C10orf11 | Cluster0003 |
| 15048088 | ENSECAT00000016037 // C14orf49 // chromosome 14 open reading frame 49 // --- // ---     | C14orf49 | Cluster0003 |
| 14979961 | ENSECAT00000008938 // C16orf62 // chromosome 16 open reading frame 62 // --- // ---     | C16orf62 | Cluster0003 |
| 15131423 | ENSECAT00000015283 // CASK // calcium/calmodulin-dependent serine protein kinase (MAGUK | CASK     | Cluster0003 |
| 15057493 | XM_001491168 // CCDC111 // coiled-coil domain containing 111 // --- // 100058061 /// EN | CCDC111  | Cluster0003 |
| 15105323 | ENSECAT00000009747 // CCDC15 // coiled-coil domain containing 15 // --- // ---          | CCDC15   | Cluster0003 |
| 15012340 | ENSECAT00000015618 // CCDC50 // coiled-coil domain containing 50 // --- // ---          | CCDC50   | Cluster0003 |
| 15085643 | NM_001081927 // CD14 // CD14 molecule-like // --- // 100034125 /// NM_001081927 // CD14 | CD14     | Cluster0003 |
| 15100171 | ENSECAT00000020379 // CD163 // CD163 molecule // --- // ---                             | CD163    | Cluster0003 |
| 15085645 | ENSECAT00000024021 // CD244 // CD244 molecule, natural killer cell receptor 2B4 // ---  | CD244    | Cluster0003 |
| 15092628 | ENSECAT00000017996 // CDC14A // CDC14 cell division cycle 14 homolog A (S. cerevisiae)  | CDC14A   | Cluster0003 |
| 15026981 | XM_001494637 // CDKAL1 // CDK5 regulatory subunit associated protein 1-like 1 // --- // | CDKAL1   | Cluster0003 |
| 15070754 | XM_001915383 // CDS1 // CDP-diaclyglycerol synthase (phosphatidate cytidyltransferase   | CDS1     | Cluster0003 |
| 15061584 | XM_001488742 // CERK // ceramide kinase // --- // 100053604 /// ENSECAT00000005822 // C | CERK     | Cluster0003 |
| 15040346 | XM_001502770 // CHD6 // chromodomain helicase DNA binding protein 6 // --- // 100055799 | CHD6     | Cluster0003 |
| 15064009 | ENSECAT00000012261 // CHD9 // chromodomain helicase DNA binding protein 9 // --- // --- | CHD9     | Cluster0003 |
| 14974104 | XM_001492289 // CHKA // choline kinase alpha // --- // 100059839 /// ENSECAT00000012200 | CHKA     | Cluster0003 |
| 14997439 | ENSECAT00000017801 // CLASP2 // cytoplasmic linker associated protein 2 // --- // 10005 | CLASP2   | Cluster0003 |
| 15128045 | XM_001495945 // CLCN5 // chloride channel, voltage-sensitive 5 // --- // 100052289 ///  | CLCN5    | Cluster0003 |

|          |                                                                                           |          |             |
|----------|-------------------------------------------------------------------------------------------|----------|-------------|
| 15024088 | ENSECAT00000016665 // CLCN6 // chloride channel, voltage-sensitive 6 // --- // 10005620   | CLCN6    | Cluster0003 |
| 15107148 | XM_001917473 // CLPB // ClpB caseinolytic peptidase B homolog (E. coli) // --- // 10006   | CLPB     | Cluster0003 |
| 15068976 | XM_001495241 // CNOT1 // CCR4-NOT transcription complex, subunit 1 // --- // 100052554    | CNOT1    | Cluster0003 |
| 14965666 | XM_001494164 // COASY // CoA synthase // --- // 100066023 // ENSECAT00000008734 // COA    | COASY    | Cluster0003 |
| 15051087 | ENSECAT00000008185 // COBRA1 // cofactor of BRCA1 // --- // ---                           | COBRA1   | Cluster0003 |
| 15080426 | XM_001492486 // COG5 // component of oligomeric golgi complex 5 // --- // 100060129 //    | COG5     | Cluster0003 |
| 14984090 | ENSECAT00000018857 // COL4A3BP // collagen, type IV, alpha 3 (Goodpasture antigen) bind   | COL4A3BP | Cluster0003 |
| 15082825 | XM_001498558 // COPG2 // coatomer protein complex, subunit gamma 2 // --- // 100068740    | COPG2    | Cluster0003 |
| 14974139 | ENSECAT00000018528 // CPT1A // carnitine palmitoyltransferase 1A (liver) // --- // 1000   | CPT1A    | Cluster0003 |
| 15082071 | XM_001500152 // CPVL // carboxypeptidase, vitellogenic-like // --- // 100069591 // ENS    | CPVL     | Cluster0003 |
| 15077251 | ENSECAT00000009328 // CROT // carnitine O-octanoyltransferase // --- // 100050111 // X    | CROT     | Cluster0003 |
| 14982268 | ENSECAT00000003682 // CSF1R // colony stimulating factor 1 receptor // --- // 100060422   | CSF1R    | Cluster0003 |
| 15024564 | NM_001081818 // C-SKI // SKI // --- // 100033833 // ENSECAT00000013268 // C-SKI // SKI    | C-SKI    | Cluster0003 |
| 14937537 | EF397512 // CSNK1G1 // casein kinase 1, gamma 1 // --- // 100053829 // EF397513 // CSN    | CSNK1G1  | Cluster0003 |
| 15117068 | XM_001496009 // CTDP1 // CTD (carboxy-terminal domain, RNA polymerase II, polypeptide A   | CTDP1    | Cluster0003 |
| 14970086 | ENSECAT00000019101 // CTNND1 // catenin (cadherin-associated protein), delta 1 // --- /   | CTNND1   | Cluster0003 |
| 15061879 | XM_001491887 // CUL2 // cullin 2 // --- // 100054982 // ENSECAT00000016792 // CUL2 //     | CUL2     | Cluster0003 |
| 15044474 | XM_001497278 // DAAMI // dishevelled associated activator of morphogenesis 1 // --- //    | DAAMI    | Cluster0003 |
| 15007258 | ENSECAT00000025338 // DCAF17 // DDB1 and CUL4 associated factor 17 // --- // 100063621    | DCAF17   | Cluster0003 |
| 14988953 | XM_001916726 // DCTN1 // dynactin 1 // --- // 100053938 // ENSECAT00000007498 // DCTN1    | DCTN1    | Cluster0003 |
| 15046670 | XM_001489495 // DDHD1 // DDHD domain containing 1 // --- // 100055200 // ENSECAT000000    | DDHD1    | Cluster0003 |
| 15104341 | XM_001499568 // DDX10 // DEAD (Asp-Glu-Ala-Asp) box polypeptide 10 // --- // 100069845    | DDX10    | Cluster0003 |
| 15069606 | XM_001498400 // DDX19B // DEAD (Asp-Glu-Ala-Asp) box polypeptide 19B // --- // 10006857   | DDX19B   | Cluster0003 |
| 15028186 | XM_003363703 // DEF6 // differentially expressed in FDCEP 6 homolog (mouse) // --- // 10  | DEF6     | Cluster0003 |
| 15052520 | ENSECAT00000023899 // DENND1A // DENN/MADD domain containing 1A // --- // ---             | DENND1A  | Cluster0003 |
| 15087625 | XM_001498238 // DENND2D // DENN/MADD domain containing 2D // --- // 100058822 // ENSEC    | DENND2D  | Cluster0003 |
| 15117519 | XM_003365446 // DEPDC5 // DEP domain containing 5 // --- // 100058243 // XM_001496321     | DEPDC5   | Cluster0003 |
| 14961270 | XM_001503319 // DGKE // diacylglycerol kinase, epsilon 64kDa // --- // 100056676 // EN    | DGKE     | Cluster0003 |
| 15084903 | XM_001489480 // DHX9 // DEAH (Asp-Glu-Ala-His) box polypeptide 9 // --- // 100055171 //   | DHX9     | Cluster0003 |
| 15128987 | ENSECAT00000012332 // DIAPH2 // diaphanous homolog 2 (Drosophila) // --- // 100057058     | DIAPH2   | Cluster0003 |
| 15048050 | ENSECAT00000007356 // DICER1 // dicer 1, ribonuclease type III // --- // 100065648 //     | DICER1   | Cluster0003 |
| 14946253 | XM_001918098 // DIS3L // DIS3 mitotic control homolog (S. cerevisiae)-like // --- // 10   | DIS3L    | Cluster0003 |
| 15012405 | ENSECAT00000013029 // DLG1 // discs, large homolog 1 (Drosophila) // --- // 100060094 //  | DLG1     | Cluster0003 |
| 14938164 | XM_001918182 // DMXL2 // Dmx-like 2 // --- // 100055186 // ENSECAT00000001362 // DMXL2    | DMXL2    | Cluster0003 |
| 15018809 | ENSECAT00000007404 // DNAJC11 // DnaJ (Hsp40) homolog, subfamily C, member 11 // --- //   | DNAJC11  | Cluster0003 |
| 14982693 | XM_001504229 // DNAJC18 // DnaJ (Hsp40) homolog, subfamily C, member 18 // --- // 10006   | DNAJC18  | Cluster0003 |
| 15129618 | ENSECAT00000022507 // DOCK11 // dedicator of cytokinesis 11 // --- // 100055441 // ENS    | DOCK11   | Cluster0003 |
| 14984758 | ENSECAT00000010317 // DOCK2 // dedicator of cytokinesis 2 // --- // 100070446 // ENSEC    | DOCK2    | Cluster0003 |
| 14952314 | ENSECAT00000006627 // DOPEY1 // dopey family member 1 // --- // 100065361 // XM_001915    | DOPEY1   | Cluster0003 |
| 15088003 | XM_001490618 // DPYD // dihydropyrimidine dehydrogenase // --- // 100057177 // ENSECAT    | DPYD     | Cluster0003 |
| 15033910 | XM_001500714 // DROSHA // drosha, ribonuclease type III // --- // 100054238 // ENSECAT    | DROSHA   | Cluster0003 |
| 15032182 | ENSECAT00000019218 // DST // dystonin // --- // 100056885 // ENSECAT00000019286 // DST    | DST      | Cluster0003 |
| 15120193 | ENSECAT00000003572 // DYM // dymeclin // --- // 100053667                                 | DYM      | Cluster0003 |
| 15015220 | XM_001503246 // DZIP3 // DAZ interacting protein 3, zinc finger // --- // 100061685 //    | DZIP3    | Cluster0003 |
| 14979763 | ENSECAT00000024745 // EEF2K // eukaryotic elongation factor-2 kinase // --- // 10005838   | EEF2K    | Cluster0003 |
| 15122538 | ENSECAT00000016194 // EFR3A // EFR3 homolog A (S. cerevisiae) // --- // 100057838 // X    | EFR3A    | Cluster0003 |
| 15077164 | ENSECAT00000011366 // EGFR // epidermal growth factor receptor // --- // 100067755        | EGFR     | Cluster0003 |
| 14970995 | ENSECAT00000010852 // EHBP1L1 // EH domain binding protein 1-like 1 // --- // ---         | EHBP1L1  | Cluster0003 |
| 15016415 | XM_001496198 // EIF2B3 // eukaryotic translation initiation factor 2B, subunit 3 gamma,   | EIF2B3   | Cluster0003 |
| 15022551 | XM_001503663 // EIF2C1 // eukaryotic translation initiation factor 2C, 1 // --- // 1000   | EIF2C1   | Cluster0003 |
| 15019835 | XM_001495587 // ELP3 // elongation protein 3 homolog (S. cerevisiae) // --- // 10005468   | ELP3     | Cluster0003 |
| 15066132 | ENSECAT00000024297 // EMCN // endomucin // --- // ---                                     | EMCN     | Cluster0003 |
| 15115914 | ENSECAT00000026568 // EMILIN2 // elastin microfibril interfacier 2 // --- // 100062096 // | EMILIN2  | Cluster0003 |
| 14993407 | XM_003363001 // EML4 // echinoderm microtubule associated protein like 4 // --- // 1000   | EML4     | Cluster0003 |

|          |                                                                                          |         |             |
|----------|------------------------------------------------------------------------------------------|---------|-------------|
| 15029016 | ENSECAT00000009130 // ENPP4 // ectonucleotide pyrophosphatase/phosphodiesterase 4 (puta  | ENPP4   | Cluster0003 |
| 15031833 | ENSECAT00000012639 // ENPP5 // ectonucleotide pyrophosphatase/phosphodiesterase 5 (puta  | ENPP5   | Cluster0003 |
| 14942463 | ENSECAT00000017357 // ENTPD1 // ectonucleoside triphosphate diphosphohydrolase 1 // ---  | ENTPD1  | Cluster0003 |
| 15073388 | XM_001488930 // EPRS // glutamyl-prolyl-tRNA synthetase // --- // 100050245 /// ENSECAT  | EPRS    | Cluster0003 |
| 14983672 | XM_001503689 // ERAP1 // endoplasmic reticulum aminopeptidase 1 // --- // 100073224 ///  | ERAP1   | Cluster0003 |
| 15099674 | ENSECAT000000026910 // ERC1 // ELKS/RAB6-interacting/CAST family member 1 // --- // 1000 | ERC1    | Cluster0003 |
| 14935525 | ENSECAT00000014986 // ERCC6 // excision repair cross-complementing rodent repair defici  | ERCC6   | Cluster0003 |
| 15036635 | ENSECAT000000020543 // ESF1 // ESF1, nucleolar pre-rRNA processing protein, homolog (S.  | ESF1    | Cluster0003 |
| 15097636 | ENSECAT00000014392 // ESYT1 // extended synaptotagmin-like protein 1 // --- // 10005197  | ESYT1   | Cluster0003 |
| 15088159 | XM_003365094 // EVI5 // ecotropic viral integration site 5 // --- // 100059782 /// ENSE  | EVI5    | Cluster0003 |
| 15071487 | ENSECAT000000025747 // EXOC1 // exocyst complex component 1 // --- // 100059087          | EXOC1   | Cluster0003 |
| 15029502 | ENSECAT000000000068 // EXOC2 // exocyst complex component 2 // --- // 100049898 /// ENSE | EXOC2   | Cluster0003 |
| 14935402 | NM_001256924 // EXOC8 // exocyst complex component 8 // --- // 100051172 /// ENSECAT000  | EXOC8   | Cluster0003 |
| 15001061 | ENSECAT00000016498 // EXOG // endo/exonuclease (5 -3 ), endonuclease G-like // --- // 1  | EXOG    | Cluster0003 |
| 15075680 | XM_001492052 // EZR // ezrin // --- // 100059467 /// ENSECAT00000019839 // EZR // ezrin  | EZR     | Cluster0003 |
| 15016093 | XM_001494368 // FAF1 // Fas (TNFRSF6) associated factor 1 // --- // 100062977 /// ENSEC  | FAF1    | Cluster0003 |
| 15075256 | ENSECAT000000020080 // FAM120B // family with sequence similarity 120B // --- // ---     | FAM120B | Cluster0003 |
| 14983808 | ENSECAT00000019460 // FAM172A // family with sequence similarity 172, member A // --- /  | FAM172A | Cluster0003 |
| 14942200 | ENSECAT00000011855 // FAM178A // family with sequence similarity 178, member A // --- /  | FAM178A | Cluster0003 |
| 14995794 | ENSECAT00000010119 // FAM208A // family with sequence similarity 208, member A // --- /  | FAM208A | Cluster0003 |
| 15026646 | ENSECAT000000000235 // FARS2 // phenylalanyl-tRNA synthetase 2, mitochondrial // --- //  | FARS2   | Cluster0003 |
| 15063689 | XM_001916971 // FBXO18 // F-box protein, helicase, 18 // --- // 100070322 /// ENSECAT00  | FBXO18  | Cluster0003 |
| 14952778 | ENSECAT00000016794 // FIG4 // FIG4 homolog, SAC1 lipid phosphatase domain containing (S  | FIG4    | Cluster0003 |
| 15031285 | ENSECAT00000011657 // FKBP5 // FK506 binding protein 5 // --- // 100053546 /// XM_00149  | FKBP5   | Cluster0003 |
| 15062493 | ENSECAT00000014180 // FRMD4A // FERM domain containing 4A // --- // 100056511            | FRMD4A  | Cluster0003 |
| 14995340 | ENSECAT00000017447 // FRMD4B // FERM domain containing 4B // --- // 100063494 /// XM_00  | FRMD4B  | Cluster0003 |
| 15067385 | ENSECAT000000027142 // FRYL // FRY-like // --- // 100054294                              | FRYL    | Cluster0003 |
| 15064067 | ENSECAT000000024522 // FTO // fat mass and obesity associated // --- // 100060565 /// XM | FTO     | Cluster0003 |
| 15050338 | ENSECAT00000012324 // FUBP3 // far upstream element (FUSE) binding protein 3 // --- //   | FUBP3   | Cluster0003 |
| 15044831 | ENSECAT00000015238 // FUT8 // fucosyltransferase 8 (alpha (1,6) fucosyltransferase) //   | FUT8    | Cluster0003 |
| 14997072 | ENSECAT00000014425 // FYCO1 // FYVE and coiled-coil domain containing 1 // --- // 10005  | FYCO1   | Cluster0003 |
| 15103167 | AF510336 // G6S // N-acetylglucosamine-6-sulfatase // --- // 100034131                   | G6S     | Cluster0003 |
| 15106776 | XM_001494299 // GAB2 // GRB2-associated binding protein 2 // --- // 100062877 /// ENSEC  | GAB2    | Cluster0003 |
| 15047666 | ENSECAT00000010104 // GALC // galactosylceramidase // --- // 100034130                   | GALC    | Cluster0003 |
| 15102031 | ENSECAT00000017151 // GALNT6 // UDP-N-acetyl-alpha-D-galactosamine:polypeptide N-acetyl  | GALNT6  | Cluster0003 |
| 14973278 | ENSECAT00000015836 // GANAB // glucosidase, alpha; neutral AB // --- // 100060146 /// X  | GANAB   | Cluster0003 |
| 14947172 | ENSECAT000000026930 // GANC // glucosidase, alpha; neutral C // --- // 100070973 /// XM_ | GANC    | Cluster0003 |
| 15055189 | XM_001497921 // GART // phosphoribosylglycinamide formyltransferase, phosphoribosylglyc  | GART    | Cluster0003 |
| 14981996 | ENSECAT000000022126 // GEMIN5 // gem (nuclear organelle) associated protein 5 // --- //  | GEMIN5  | Cluster0003 |
| 15094691 | ENSECAT000000026267 // GIGYF2 // GRB10 interacting GYF protein 2 // --- // 100064814 /// | GIGYF2  | Cluster0003 |
| 15079849 | XM_001494502 // GIMAP8 // GTPase, IMAP family member 8 // --- // 100063176 /// ENSECAT0  | GIMAP8  | Cluster0003 |
| 14946686 | ENSECAT000000021118 // GLDN // gliomedin // --- // ---                                   | GLDN    | Cluster0003 |
| 15049976 | XM_001500680 // GLE1 // GLE1 RNA export mediator homolog (yeast) // --- // 100066964 /// | GLE1    | Cluster0003 |
| 15029536 | ENSECAT00000001963 // GMDS // GDP-mannose 4,6-dehydratase // --- // 100057325 /// XM_00  | GMDS    | Cluster0003 |
| 15001238 | XM_001489013 // GOLGA4 // golgin A4 // --- // 100050216 /// ENSECAT00000014443 // GOLGA  | GOLGA4  | Cluster0003 |
| 15036779 | XM_001915486 // GPCPD1 // glycerophosphocholine phosphodiesterase GDE1 homolog (S. cere  | GPCPD1  | Cluster0003 |
| 15006839 | ENSECAT00000019811 // GPD2 // glycerol-3-phosphate dehydrogenase 2 (mitochondrial) // -  | GPD2    | Cluster0003 |
| 15081027 | XM_001498401 // GRB10 // growth factor receptor-bound protein 10 // --- // 100052610 /// | GRB10   | Cluster0003 |
| 15131648 | ENSECAT000000021176 // GRIPAP1 // GRIP1 associated protein 1 // --- // ---               | GRIPAP1 | Cluster0003 |
| 14984435 | ENSECAT000000021646 // GRK6 // G protein-coupled receptor kinase 6 // --- // 100068570 / | GRK6    | Cluster0003 |
| 14975641 | ENSECAT000000022482 // GTF2I // general transcription factor Ii // --- // --- /// ENSEC  | GTF2I   | Cluster0003 |
| 14976233 | ENSECAT00000011161 // GTF3C1 // general transcription factor IIIC, polypeptide 1, alpha  | GTF3C1  | Cluster0003 |
| 15010893 | XM_001502507 // GTF3C3 // general transcription factor IIIC, polypeptide 3, 102kDa // -  | GTF3C3  | Cluster0003 |
| 14982930 | XM_001504362 // H2AFY // H2A histone family, member Y // --- // 100062747 /// XM_003362  | H2AFY   | Cluster0003 |

|          |                                                                                          |              |             |
|----------|------------------------------------------------------------------------------------------|--------------|-------------|
| 14935112 | ENSECAT00000023505 // HEATR1 // HEAT repeat containing 1 // --- // 100050411 /// XM_001  | HEATR1       | Cluster0003 |
| 14948567 | ENSECAT00000017428 // HEATR5A // HEAT repeat containing 5A // --- // ---                 | HEATR5A      | Cluster0003 |
| 14945429 | ENSECAT00000019649 // HERC2 // HECT and RLD domain containing E3 ubiquitin protein liga  | HERC2        | Cluster0003 |
| 14934513 | XM_001917996 // HK1 // hexokinase 1 // --- // 100072687 /// ENSECAT00000012040 // HK1 /  | HK1          | Cluster0003 |
| 15055274 | ENSECAT00000012521 // HLCS // holocarboxylase synthetase (biotin-(propionyl)-CoA-carbox  | HLCS         | Cluster0003 |
| 15058873 | XM_001499685 // HMGXB4 // HMG box domain containing 4 // --- // 100054243 /// ENSECAT00  | HMGXB4       | Cluster0003 |
| 14998456 | ENSECAT00000008736 // HPS3 // Hermansky-Pudlak syndrome 3 // --- // 100058614            | HPS3         | Cluster0003 |
| 15066504 | ENSECAT00000025455 // HPSE // heparanase // --- // 100061267 /// XM_001493282 // HPSE /  | HPSE         | Cluster0003 |
| 14986424 | NM_001081901 // HSD17B4 // hydroxysteroid (17-beta) dehydrogenase 4 // --- // 100034046  | HSD17B4      | Cluster0003 |
| 15128169 | ENSECAT00000024109 // HUWE1 // HECT, UBA and WWE domain containing 1, E3 ubiquitin prot  | HUWE1        | Cluster0003 |
| 15042613 | XM_001491121 // IARS // isoleucyl-tRNA synthetase // --- // 100054721 /// ENSECAT000000  | IARS         | Cluster0003 |
| 15075040 | XM_001491469 // IGF2R // insulin-like growth factor 2 receptor // --- // 100058539 ///   | IGF2R        | Cluster0003 |
| 15051731 | XM_001492506 // IKBKAP // inhibitor of kappa light polypeptide gene enhancer in B-cells  | IKBKAP       | Cluster0003 |
| 15084003 | ENSECAT00000000739 // IKBKE // inhibitor of kappa light polypeptide gene enhancer in B-  | IKBKE        | Cluster0003 |
| 15077128 | ENSECAT00000019692 // IKZF1 // IKAROS family zinc finger 1 (Ikaros) // --- // 100052437  | IKZF1        | Cluster0003 |
| 15116025 | ENSECAT000000021625 // IMPACT // Impact homolog (mouse) // --- // ---                    | IMPACT       | Cluster0003 |
| 14991652 | XM_003363011 // INPP4A // inositol polyphosphate-4-phosphatase, type I, 107kDa // --- /  | INPP4A       | Cluster0003 |
| 14941354 | XM_001496265 // INPP5F // inositol polyphosphate-5-phosphatase F // --- // 100065762 //  | INPP5F       | Cluster0003 |
| 14961511 | ENSECAT00000022612 // INTS2 // integrator complex subunit 2 // --- // 100071151 /// XM_  | INTS2        | Cluster0003 |
| 15035226 | XM_001493727 // IPO11 // importin 11 // --- // 100050828 /// ENSECAT00000015335 // IPO1  | IPO11        | Cluster0003 |
| 15101117 | XM_001503000 // IPO8 // importin 8 // --- // 100064845 /// ENSECAT00000014160 // IPO8 /  | IPO8         | Cluster0003 |
| 14987340 | XM_001503963 // IQGAP2 // IQ motif containing GTPase activating protein 2 // --- // 100  | IQGAP2       | Cluster0003 |
| 15068603 | ENSECAT00000014564 // ITFG1 // integrin alpha FG-GAP repeat containing 1 // --- // 1000  | ITFG1        | Cluster0003 |
| 15007561 | ENSECAT00000011502 // ITGA4 // integrin, alpha 4 (antigen CD49D, alpha 4 subunit of VLA  | ITGA4        | Cluster0003 |
| 14979289 | EU881921 // ITGAL // integrin, alpha L (antigen CD11A (p180), lymphocyte function-assoc  | ITGAL        | Cluster0003 |
| 15100980 | ENSECAT000000009891 // ITPR2 // inositol 1,4,5-trisphosphate receptor, type 2 // --- //  | ITPR2        | Cluster0003 |
| 15083149 | XM_001496508 // JHDM1D // jumonji C domain containing histone demethylase 1 homolog D (  | JHDM1D       | Cluster0003 |
| 15024455 | ENSECAT00000012981 // KCNAB2 // potassium voltage-gated channel, shaker-related subfami  | KCNAB2       | Cluster0003 |
| 15026924 | XM_001496578 // KDM1B // lysine (K)-specific demethylase 1B // --- // 100066240 /// ENS  | KDM1B        | Cluster0003 |
| 15042028 | XM_001492896 // KDM4C // lysine (K)-specific demethylase 4C // --- // 100060699 /// ENS  | KDM4C        | Cluster0003 |
| 15095372 | ENSECAT00000023294 // KDM5A // lysine (K)-specific demethylase 5A // --- // 100056935 /  | KDM5A        | Cluster0003 |
| 15120541 | ENSECAT000000021754 // KDSR // 3-ketodihydrospingosine reductase // --- // ---           | KDSR         | Cluster0003 |
| 14952852 | ENSECAT00000023234 // KIAA1919 // KIAA1919 // --- // ---                                 | KIAA1919     | Cluster0003 |
| 15071905 | ENSECAT000000099334 // KLHL5 // kelch-like 5 (Drosophila) // --- // 100064472 /// XM_001 | KLHL5        | Cluster0003 |
| 15006628 | ENSECAT00000019639 // KYNU // kynureninase // --- // 100057449 /// XM_001490785 // KYNU  | KYNU         | Cluster0003 |
| 14952686 | ENSECAT000000025234 // LACE1 // lactation elevated 1 // --- // 100066538 /// XM_00150398 | LACE1        | Cluster0003 |
| 14982416 | XM_001503913 // LARS // leucyl-tRNA synthetase // --- // 100061092 /// ENSECAT000000101  | LARS         | Cluster0003 |
| 15003307 | XM_001490588 // LCP1 // lymphocyte cytosolic protein 1 (L-plastin) // --- // 100050663   | LCP1         | Cluster0003 |
| 15016572 | XM_001497401 // LEPRE1 // leucine proline-enriched proteoglycan (leprecan) 1 // --- //   | LEPRE1       | Cluster0003 |
| 15068422 | XM_001488446 // LETM1 // leucine zipper-EF-hand containing transmembrane protein 1 // -  | LETM1        | Cluster0003 |
| 14966954 | ENSECAT00000017866 // LIG3 // ligase III, DNA, ATP-dependent // --- // 100071671 /// XM  | LIG3         | Cluster0003 |
| 15101941 | ENSECAT00000012390 // LIMA1 // LIM domain and actin binding 1 // --- // 100060033        | LIMA1        | Cluster0003 |
| 15083766 | ENSECAT00000026308 // LMBR1 // limb region 1 homolog (mouse) // --- // 100066736 /// XM  | LMBR1        | Cluster0003 |
| 14941034 | XM_001488425 // LOC100049801 // methylated-DNA--protein-cysteine methyltransferase-like  | LOC100049801 | Cluster0003 |
| 15015651 | XM_001488028 // LOC100049896 // lipid phosphate phosphohydrolase 3-like // --- // 10004  | LOC100049896 | Cluster0003 |
| 15065811 | ENSECAT00000020893 // LOC100050042 // trafficking protein particle complex subunit 2-li  | LOC100050042 | Cluster0003 |
| 15002536 | XM_003363190 // LOC100050287 // transcription elongation factor A protein-like 8-like /  | LOC100050287 | Cluster0003 |
| 14980087 | ENSECAT00000009379 // LOC100050421 // nuclear distribution protein nudE homolog 1-like   | LOC100050421 | Cluster0003 |
| 15084669 | XM_001487852 // LOC100050551 // sterol O-acyltransferase 1-like // --- // 100050551 ///  | LOC100050551 | Cluster0003 |
| 14976819 | ENSECAT00000019299 // LOC100050655 // poly(A)-specific ribonuclease PARN-like // --- //  | LOC100050655 | Cluster0003 |
| 15006280 | XM_001488507 // LOC100050708 // TFIIH basal transcription factor complex helicase XPB s  | LOC100050708 | Cluster0003 |
| 15055539 | XM_001491140 // LOC100050760 // cystatin-B-like // --- // 100050760 /// ENSECAT000000014 | LOC100050760 | Cluster0003 |
| 15059541 | ENSECAT000000021915 // LOC100050914 // gamma-parvin-like // --- // 100050914 /// XM_0014 | LOC100050914 | Cluster0003 |
| 15085249 | XM_001915520 // LOC100050924 // transmembrane protein 206-like // --- // 100050924 ///   | LOC100050924 | Cluster0003 |

|          |                                                                                          |              |             |
|----------|------------------------------------------------------------------------------------------|--------------|-------------|
| 15002158 | XM_001492309 // LOC100051043 // phospholipid scramblase 2-like // --- // 100051043 ///   | LOC100051043 | Cluster0003 |
| 15030409 | XM_001491453 // LOC100051158 // putative pre-mRNA-splicing factor ATP-dependent RNA hel  | LOC100051158 | Cluster0003 |
| 15070135 | XM_001488069 // LOC100051284 // n-acetylgalactosamine-6-sulfatase-like // --- // 100051  | LOC100051284 | Cluster0003 |
| 14944257 | ENSECAT000000007871 // LOC100051390 // AN1-type zinc finger and ubiquitin domain-contain | LOC100051390 | Cluster0003 |
| 15090249 | XM_001915744 // LOC100051433 // digestive organ expansion factor homolog // --- // 1000  | LOC100051433 | Cluster0003 |
| 15044562 | XM_001497949 // LOC100051488 // CDK-activating kinase assembly factor MAT1-like // ---   | LOC100051488 | Cluster0003 |
| 14992859 | XM_003362988 // LOC100051543 // UTP--glucose-1-phosphate uridylyltransferase-like // --  | LOC100051543 | Cluster0003 |
| 15097539 | XM_003365259 // LOC100051662 // diacylglycerol kinase alpha-like // --- // 100051662 //  | LOC100051662 | Cluster0003 |
| 15030919 | ENSECAT000000005280 // LOC100051758 // pre-B-cell leukemia transcription factor 2-like / | LOC100051758 | Cluster0003 |
| 15053979 | ENSECAT000000024598 // LOC100051829 // protein dopey-2-like // --- // 100051829          | LOC100051829 | Cluster0003 |
| 15127262 | ENSECAT000000018780 // LOC100051857 // spermine synthase-like // --- // 100051857 /// XM | LOC100051857 | Cluster0003 |
| 15064179 | ENSECAT000000005664 // LOC100051892 // nuclear pore complex protein Nup93-like // --- // | LOC100051892 | Cluster0003 |
| 14940205 | XM_001491019 // LOC100051911 // DDB1- and CUL4-associated factor 11-like // --- // 1000  | LOC100051911 | Cluster0003 |
| 15103243 | ENSECAT000000000800 // LOC100051965 // nuclear protein MDM1-like // --- // 100051965     | LOC100051965 | Cluster0003 |
| 15033271 | XM_001916390 // LOC100052007 // ATP-dependent RNA helicase DHX29-like // --- // 1000520  | LOC100052007 | Cluster0003 |
| 14988441 | ENSECAT000000007417 // LOC100052052 // tubulin--tyrosine ligase-like // --- // 100052052 | LOC100052052 | Cluster0003 |
| 15098273 | ENSECAT000000014580 // LOC100052084 // e3 ubiquitin-protein ligase Mdm2-like // --- // 1 | LOC100052084 | Cluster0003 |
| 15107038 | XM_001498480 // LOC100052144 // mitochondrial uncoupling protein 2-like // --- // 10005  | LOC100052144 | Cluster0003 |
| 15132128 | ENSECAT000000019797 // LOC100052401 // histone deacetylase 8-like // --- // 100052401 // | LOC100052401 | Cluster0003 |
| 15102879 | XM_001488356 // LOC100052445 // retinol dehydrogenase 16-like // --- // 100052445 /// E  | LOC100052445 | Cluster0003 |
| 15095662 | XM_001497051 // LOC100052502 // t-cell surface glycoprotein CD4-like // --- // 10005250  | LOC100052502 | Cluster0003 |
| 14944475 | ENSECAT000000014974 // LOC100052580 // protein FAM190B-like // --- // 100052580 /// XM_0 | LOC100052580 | Cluster0003 |
| 15035571 | XM_001498159 // LOC100052705 // NAD(P) transhydrogenase, mitochondrial-like // --- // 1  | LOC100052705 | Cluster0003 |
| 15052116 | XM_001488664 // LOC100052763 // delta-aminolevulinic acid dehydratase-like // --- // 10  | LOC100052763 | Cluster0003 |
| 15005451 | ENSECAT000000013234 // LOC100053014 // probable E3 ubiquitin-protein ligase MYCBP2-like  | LOC100053014 | Cluster0003 |
| 15113390 | ENSECAT000000015042 // LOC100053038 // cytospin-A-like // --- // 100053038 /// XM_001488 | LOC100053038 | Cluster0003 |
| 14937447 | ENSECAT000000011730 // LOC100053293 // poly [ADP-ribose] polymerase 16-like // --- // 10 | LOC100053293 | Cluster0003 |
| 15004337 | XM_001488643 // LOC100053345 // paraspeckle component 1-like // --- // 100053345 /// EN  | LOC100053345 | Cluster0003 |
| 15027124 | ENSECAT000000026969 // LOC100053350 // hereditary hemochromatosis protein homolog // --- | LOC100053350 | Cluster0003 |
| 14937499 | XM_001498388 // LOC100053578 // maspardin-like // --- // 100053578 /// ENSECAT0000000135 | LOC100053578 | Cluster0003 |
| 14959310 | XM_001917124 // LOC100053831 // testis-expressed sequence 2 protein-like // --- // 1000  | LOC100053831 | Cluster0003 |
| 14993476 | ENSECAT000000015307 // LOC100054079 // aldose 1-epimerase-like // --- // 100054079 /// X | LOC100054079 | Cluster0003 |
| 15073336 | ENSECAT000000019881 // LOC100054203 // MOSC domain-containing protein 1, mitochondrial-1 | LOC100054203 | Cluster0003 |
| 15019752 | XM_003364471 // LOC100054410 // dihydropyrimidinase-related protein 2-like // --- // 10  | LOC100054410 | Cluster0003 |
| 15099561 | ENSECAT000000015117 // LOC100054664 // uncharacterized LOC100054664 // --- // 100054664  | LOC100054664 | Cluster0003 |
| 14990261 | ENSECAT000000015187 // LOC100054688 // xanthine dehydrogenase/oxidase-like // --- // 100 | LOC100054688 | Cluster0003 |
| 15048891 | XM_001915559 // LOC100054700 // inversin-like // --- // 100054700 /// ENSECAT00000001006 | LOC100054700 | Cluster0003 |
| 15026521 | ENSECAT000000015223 // LOC100054792 // dual specificity protein phosphatase 22-like // - | LOC100054792 | Cluster0003 |
| 15028672 | ENSECAT000000021875 // LOC100054835 // uncharacterized protein KIAA0240-like // --- // 1 | LOC100054835 | Cluster0003 |
| 14951027 | XM_001917290 // LOC100054907 // u1 small nuclear ribonucleoprotein 70 kDa-like // --- /  | LOC100054907 | Cluster0003 |
| 15041680 | ENSECAT000000021328 // LOC100054931 // retinal dehydrogenase 1-like // --- // 100054931  | LOC100054931 | Cluster0003 |
| 15086910 | XM_001490599 // LOC100054991 // cathepsin K-like // --- // 100054991 /// ENSECAT00000002 | LOC100054991 | Cluster0003 |
| 14940154 | XM_001489375 // LOC100054994 // dehydrogenase/reductase SDR family member 4-like // ---  | LOC100054994 | Cluster0003 |
| 15028781 | XM_001501854 // LOC100055106 // cullin-9-like // --- // 100055106 /// ENSECAT00000001283 | LOC100055106 | Cluster0003 |
| 15017014 | ENSECAT000000014327 // LOC100055411 // dyslexia-associated protein KIAA0319-like protein | LOC100055411 | Cluster0003 |
| 15086704 | XM_001916034 // LOC100055681 // thioesterase superfamily member 4-like // --- // 100055  | LOC100055681 | Cluster0003 |
| 14988079 | ENSECAT000000020766 // LOC100055746 // sorting nexin-29-like // --- // 100055746         | LOC100055746 | Cluster0003 |
| 14980193 | ENSECAT000000021317 // LOC100055746 // sorting nexin-29-like // --- // 100055746 /// XM_ | LOC100055746 | Cluster0003 |
| 14994882 | ENSECAT000000014207 // LOC100055795 // sodium- and chloride-dependent taurine transporte | LOC100055795 | Cluster0003 |
| 15092686 | XM_001489930 // LOC100056015 // UDP-N-acetylglucosamine transporter-like // --- // 1000  | LOC100056015 | Cluster0003 |
| 14958128 | ENSECAT000000014077 // LOC100056075 // putative sodium-coupled neutral amino acid transp | LOC100056075 | Cluster0003 |
| 15045187 | XM_001489871 // LOC100056126 // acyl-coenzyme A thioesterase 6-like // --- // 100056126  | LOC100056126 | Cluster0003 |
| 14940444 | XM_001490020 // LOC100056157 // iron-sulfur protein NUBPL-like // --- // 100056157 ///   | LOC100056157 | Cluster0003 |
| 14964072 | XM_001489603 // LOC100056244 // regulatory-associated protein of mTOR-like // --- // 10  | LOC100056244 | Cluster0003 |

|          |                                                                                         |              |             |
|----------|-----------------------------------------------------------------------------------------|--------------|-------------|
| 14971876 | ENSECAT00000016112 // LOC100056318 // AP-2 complex subunit alpha-2-like // --- // 10005 | LOC100056318 | Cluster0003 |
| 15090278 | ENSECAT00000020548 // LOC100056429 // corticosteroid 11-beta-dehydrogenase isozyme 1-li | LOC100056429 | Cluster0003 |
| 14963811 | ENSECAT00000011318 // LOC100056490 // tubulin-specific chaperone D-like // --- // 10005 | LOC100056490 | Cluster0003 |
| 14958192 | XM_001916620 // LOC100056499 // n-sulphoglucosamine sulphohydrolase-like // --- // 1000 | LOC100056499 | Cluster0003 |
| 15044288 | XM_001490223 // LOC100056508 // protein Smaug homolog 1-like // --- // 100056508 // EN  | LOC100056508 | Cluster0003 |
| 15114527 | ENSECAT00000014088 // LOC100056569 // ATP-dependent RNA helicase DDX54-like // --- // 1 | LOC100056569 | Cluster0003 |
| 15057415 | ENSECAT00000018058 // LOC100056687 // cytochrome P450 4V2-like // --- // 100056687 //   | LOC100056687 | Cluster0003 |
| 15078669 | XM_001502591 // LOC100056692 // staphylococcal nuclease domain-containing protein 1-lik | LOC100056692 | Cluster0003 |
| 15057426 | ENSECAT00000022544 // LOC100056739 // protein FAM149A-like // --- // 100056739 // XM_0  | LOC100056739 | Cluster0003 |
| 15054439 | XM_001490477 // LOC100056927 // 6-phosphofruktokinase, liver type-like // --- // 100056 | LOC100056927 | Cluster0003 |
| 15114570 | ENSECAT00000025656 // LOC100056981 // probable E3 ubiquitin-protein ligase C12orf51-lik | LOC100056981 | Cluster0003 |
| 15030316 | XM_001490546 // LOC100057057 // ubiquitin D-like // --- // 100057057 // ENSECAT00000000 | LOC100057057 | Cluster0003 |
| 15054376 | ENSECAT00000015988 // LOC100057131 // trafficking protein particle complex subunit 10-l | LOC100057131 | Cluster0003 |
| 14932561 | ENSECAT00000007942 // LOC100057314 // protein FAM53B-like // --- // 100057314           | LOC100057314 | Cluster0003 |
| 15095425 | ENSECAT00000022092 // LOC100057420 // peptidyl-prolyl cis-trans isomerase FKBP4-like // | LOC100057420 | Cluster0003 |
| 15108234 | ENSECAT00000007548 // LOC100057503 // growth arrest-specific protein 2-like // --- // 1 | LOC100057503 | Cluster0003 |
| 15123100 | XM_001489456 // LOC100057538 // fatty acid-binding protein, epidermal-like // --- // 10 | LOC100057538 | Cluster0003 |
| 15044163 | ENSECAT00000011672 // LOC100057755 // constitutive coactivator of PPAR-gamma-like prote | LOC100057755 | Cluster0003 |
| 15044359 | XM_001491002 // LOC100057780 // UPF0679 protein C14orf101-like // --- // 100057780 //   | LOC100057780 | Cluster0003 |
| 15026566 | ENSECAT00000008719 // LOC100057868 // ribosyldihyronicotinamide dehydrogenase [quinone  | LOC100057868 | Cluster0003 |
| 15092551 | XM_001493212 // LOC100057881 // protein FAM102B-like // --- // 100057881 // ENSECAT000  | LOC100057881 | Cluster0003 |
| 15057059 | XM_001493791 // LOC100057973 // erlin-2-like // --- // 100057973 // ENSECAT0000010647   | LOC100057973 | Cluster0003 |
| 15086056 | XM_001500345 // LOC100057984 // G patch domain-containing protein 4-like // --- // 1000 | LOC100057984 | Cluster0003 |
| 15045332 | ENSECAT00000010806 // LOC100058017 // feline leukemia virus subgroup C receptor-related | LOC100058017 | Cluster0003 |
| 15046218 | ENSECAT00000017777 // LOC100058101 // cytoplasmic dynein 1 heavy chain 1-like // --- // | LOC100058101 | Cluster0003 |
| 15071400 | XM_001916811 // LOC100058152 // RE1-silencing transcription factor-like // --- // 10005 | LOC100058152 | Cluster0003 |
| 15133906 | ENSECAT00000011997 // LOC100058256 // filamin-A-like // --- // 100058256                | LOC100058256 | Cluster0003 |
| 15118640 | XM_001915599 // LOC100058510 // calcium/calmodulin-dependent protein kinase kinase 2-li | LOC100058510 | Cluster0003 |
| 15085680 | ENSECAT00000022399 // LOC100058672 // SLAM family member 6-like // --- // 100058672 //  | LOC100058672 | Cluster0003 |
| 14958470 | ENSECAT00000014219 // LOC100058914 // phosphoribosyl pyrophosphate synthase-associated  | LOC100058914 | Cluster0003 |
| 15087488 | XM_001917840 // LOC100059247 // tyrosine-protein phosphatase non-receptor type 22-like  | LOC100059247 | Cluster0003 |
| 15092846 | ENSECAT00000010453 // LOC100059248 // protein Dr1-like // --- // 100059248 // XM_00149  | LOC100059248 | Cluster0003 |
| 15071516 | XM_001916943 // LOC100059582 // probable polyprenol reductase-like // --- // 100059582  | LOC100059582 | Cluster0003 |
| 14973090 | ENSECAT00000019275 // LOC100059672 // cytochrome b ascorbate-dependent protein 3-like / | LOC100059672 | Cluster0003 |
| 15114116 | ENSECAT0000000808 // LOC100059916 // chemokine-like receptor 1-like // --- // 10005991  | LOC100059916 | Cluster0003 |
| 15100129 | ENSECAT00000014889 // LOC100060326 // complement C1r subcomponent-like protein-like //  | LOC100060326 | Cluster0003 |
| 14967823 | ENSECAT00000017441 // LOC100060346 // protein KIAA0664-like // --- // 100060346         | LOC100060346 | Cluster0003 |
| 14935396 | XM_001916677 // LOC100060551 // egl nine homolog 1-like // --- // 100060551 // ENSECAT  | LOC100060551 | Cluster0003 |
| 14933472 | ENSECAT00000019497 // LOC100060589 // erlin-1-like // --- // 100060589 // XM_001500565  | LOC100060589 | Cluster0003 |
| 15056490 | XM_001492844 // LOC100060636 // N(4)-(beta-N-acetylglucosaminyl)-L-asparaginase-like // | LOC100060636 | Cluster0003 |
| 15119586 | XM_001492917 // LOC100060744 // collectin-12-like // --- // 100060744 // ENSECAT0000000 | LOC100060744 | Cluster0003 |
| 15115032 | XM_001915436 // LOC100061102 // ATP-dependent RNA helicase DDX55-like // --- // 1000611 | LOC100061102 | Cluster0003 |
| 15066517 | ENSECAT00000013095 // LOC100061199 // 4-hydroxybenzoate polyprenyltransferase, mitochon | LOC100061199 | Cluster0003 |
| 15021462 | XM_001493315 // LOC100061338 // non-specific lipid-transfer protein-like // --- // 1000 | LOC100061338 | Cluster0003 |
| 15019145 | ENSECAT00000024692 // LOC100061432 // NAD kinase-like // --- // 100061432               | LOC100061432 | Cluster0003 |
| 15000218 | XM_001493395 // LOC100061475 // MAP kinase-activated protein kinase 3-like // --- // 10 | LOC100061475 | Cluster0003 |
| 14992741 | ENSECAT00000009486 // LOC100061509 // rho GTPase-activating protein 25-like // --- // 1 | LOC100061509 | Cluster0003 |
| 15109487 | ENSECAT00000020755 // LOC100061658 // alkylated DNA repair protein alkB homolog 8-like  | LOC100061658 | Cluster0003 |
| 15104243 | ENSECAT00000025920 // LOC100061694 // ras-related protein Rab-39A-like // --- // 100061 | LOC100061694 | Cluster0003 |
| 14982598 | ENSECAT00000023878 // LOC100061748 // histidyl-tRNA synthetase, cytoplasmic-like // --- | LOC100061748 | Cluster0003 |
| 15045526 | XM_001495194 // LOC100061785 // psychosine receptor-like // --- // 100061785 // ENSECA  | LOC100061785 | Cluster0003 |
| 15057139 | ENSECAT00000000424 // LOC100062021 // Werner syndrome ATP-dependent helicase-like // -- | LOC100062021 | Cluster0003 |
| 14982677 | ENSECAT00000018338 // LOC100062046 // transmembrane protein 173-like // --- // 10006204 | LOC100062046 | Cluster0003 |
| 15075308 | XM_001493771 // LOC100062058 // connector enhancer of kinase suppressor of ras 3-like / | LOC100062058 | Cluster0003 |

|          |                                                                                          |              |             |
|----------|------------------------------------------------------------------------------------------|--------------|-------------|
| 15072895 | XM_001493822 // LOC100062135 // adenylosuccinate synthetase isozyme 2-like // --- // 10  | LOC100062135 | Cluster0003 |
| 15097325 | XM_001504534 // LOC100062193 // RISC-loading complex subunit TARBP2-like // --- // 1000  | LOC100062193 | Cluster0003 |
| 15003918 | ENSECAT00000020134 // LOC100062251 // propionyl-CoA carboxylase alpha chain, mitochondr  | LOC100062251 | Cluster0003 |
| 15109872 | XM_001502701 // LOC100062824 // FXYD domain-containing ion transport regulator 6-like /  | LOC100062824 | Cluster0003 |
| 15073695 | ENSECAT00000013381 // LOC100062957 // calmodulin-regulated spectrin-associated protein   | LOC100062957 | Cluster0003 |
| 14945520 | ENSECAT00000013562 // LOC100063100 // cytoplasmic FMR1-interacting protein 1-like // --  | LOC100063100 | Cluster0003 |
| 15020688 | XM_001502431 // LOC100063257 // histone-lysine N-methyltransferase SETD7-like // --- //  | LOC100063257 | Cluster0003 |
| 15056160 | XM_001494597 // LOC100063334 // malignant fibrous histiocytoma-amplified sequence 1-lik  | LOC100063334 | Cluster0003 |
| 15016135 | XM_001494616 // LOC100063364 // spermatogenesis-associated protein 6-like // --- // 100  | LOC100063364 | Cluster0003 |
| 15047903 | ENSECAT00000007937 // LOC100063370 // thyroid receptor-interacting protein 11-like // -  | LOC100063370 | Cluster0003 |
| 15117667 | ENSECAT00000022284 // LOC100063639 // transcobalamin-2-like // --- // 100063639 // XM_   | LOC100063639 | Cluster0003 |
| 14943387 | ENSECAT00000018865 // LOC100063651 // calcium uptake protein 1, mitochondrial-like // -  | LOC100063651 | Cluster0003 |
| 15026054 | ENSECAT00000020736 // LOC100063889 // uncharacterized protein KIAA1109-like // --- // 1  | LOC100063889 | Cluster0003 |
| 15088397 | ENSECAT00000026954 // LOC100063932 // box C/D snoRNA protein 1-like // --- // 100063932  | LOC100063932 | Cluster0003 |
| 15066279 | ENSECAT00000020707 // LOC100063998 // protein FAM13A-like // --- // 100063998            | LOC100063998 | Cluster0003 |
| 15091003 | XM_001500143 // LOC100064158 // ammonium transporter Rh type B-like // --- // 100064158  | LOC100064158 | Cluster0003 |
| 14986709 | ENSECAT00000010439 // LOC100064643 // tyrosine-protein kinase Fer-like // --- // 100064  | LOC100064643 | Cluster0003 |
| 14983233 | XM_001498241 // LOC100064670 // 28S ribosomal protein S33, mitochondrial-like // --- //  | LOC100064670 | Cluster0003 |
| 15085965 | ENSECAT00000024151 // LOC100064689 // rho guanine nucleotide exchange factor 11-like //  | LOC100064689 | Cluster0003 |
| 14988383 | XM_001916541 // LOC100064727 // tyrosine-protein kinase Mer-like // --- // 100064727 //  | LOC100064727 | Cluster0003 |
| 14946085 | ENSECAT00000008438 // LOC100064749 // membrane progesterin receptor gamma-like // --- // | LOC100064749 | Cluster0003 |
| 15083683 | ENSECAT00000024323 // LOC100064812 // histone-lysine N-methyltransferase MLL3-like // -  | LOC100064812 | Cluster0003 |
| 14992917 | ENSECAT00000006018 // LOC100064970 // activator of 90 kDa heat shock protein ATPase hom  | LOC100064970 | Cluster0003 |
| 15091832 | XM_001497170 // LOC100064990 // chromodomain-helicase-DNA-binding protein 1-like // ---  | LOC100064990 | Cluster0003 |
| 15079049 | ENSECAT00000010428 // LOC100064995 // nuclear pore complex protein Nup205-like // --- /  | LOC100064995 | Cluster0003 |
| 14952125 | ENSECAT00000021015 // LOC100065059 // protein MTO1 homolog, mitochondrial-like // --- /  | LOC100065059 | Cluster0003 |
| 15029823 | XM_001495773 // LOC100065066 // coiled-coil domain-containing protein 90A, mitochondria  | LOC100065066 | Cluster0003 |
| 15000661 | ENSECAT00000010050 // LOC100065601 // phosphatidylinositol phosphatase SAC1-like // --   | LOC100065601 | Cluster0003 |
| 15029832 | ENSECAT00000013221 // LOC100065604 // dysbindin-like // --- // 100065604 // XM_0014961   | LOC100065604 | Cluster0003 |
| 14987488 | XM_001918348 // LOC100065643 // u3 small nucleolar RNA-associated protein 15 homolog //  | LOC100065643 | Cluster0003 |
| 14940762 | XM_001916065 // LOC100065920 // ADP-ribosylation factor 6-like // --- // 100065920 //    | LOC100065920 | Cluster0003 |
| 15094888 | XM_001915910 // LOC100065931 // arf-GAP with GTPase, ANK repeat and PH domain-containin  | LOC100065931 | Cluster0003 |
| 14932731 | XM_001493741 // LOC100065967 // sideroflexin-4-like // --- // 100065967 // ENSECAT0000   | LOC100065967 | Cluster0003 |
| 14944547 | XM_001496540 // LOC100066171 // UPF0765 protein C10orf58-like // --- // 100066171 // E   | LOC100066171 | Cluster0003 |
| 15005988 | ENSECAT00000003176 // LOC100066322 // ras-related protein Rab-20-like // --- // 1000663  | LOC100066322 | Cluster0003 |
| 15036910 | ENSECAT00000019406 // LOC100066493 // uncharacterized protein C20orf194-like // --- //   | LOC100066493 | Cluster0003 |
| 15025173 | ENSECAT00000010768 // LOC100066545 // n-acetylgalactosaminyltransferase 7-like // --- /  | LOC100066545 | Cluster0003 |
| 15066160 | ENSECAT00000012933 // LOC100066636 // RNA (guanine-9-)-methyltransferase domain-contain  | LOC100066636 | Cluster0003 |
| 14979469 | ENSECAT00000021542 // LOC100066772 // uncharacterized protein KIAA0556-like // --- // 1  | LOC100066772 | Cluster0003 |
| 15072037 | ENSECAT00000012364 // LOC100066908 // TBC1 domain family member 19-like // --- // 10006  | LOC100066908 | Cluster0003 |
| 14937572 | XM_001918045 // LOC100067089 // probable E3 ubiquitin-protein ligase HERC1-like // ---   | LOC100067089 | Cluster0003 |
| 15052631 | XM_001917241 // LOC100067215 // target of rapamycin complex 2 subunit MAPKAP1-like // -  | LOC100067215 | Cluster0003 |
| 15076431 | ENSECAT00000008422 // LOC100067266 // androgen-induced gene 1 protein-like // --- // 10  | LOC100067266 | Cluster0003 |
| 14988729 | XM_001498891 // LOC100067312 // vitamin K-dependent gamma-carboxylase-like // --- // 10  | LOC100067312 | Cluster0003 |
| 14988752 | XM_001497450 // LOC100067379 // all-trans-retinol 13,14-reductase-like // --- // 100067  | LOC100067379 | Cluster0003 |
| 15049552 | ENSECAT00000019641 // LOC100067385 // rab GTPase-activating protein 1-like // --- // 10  | LOC100067385 | Cluster0003 |
| 14957520 | ENSECAT00000014308 // LOC100067494 // band 4.1-like protein 2-like // --- // 100067494   | LOC100067494 | Cluster0003 |
| 14997217 | XM_001917025 // LOC100067713 // serine/threonine-protein kinase ULK4-like // --- // 100  | LOC100067713 | Cluster0003 |
| 15104013 | XM_001497953 // LOC100068054 // jerky protein homolog-like // --- // 100068054 // ENSE   | LOC100068054 | Cluster0003 |
| 15031816 | ENSECAT00000018747 // LOC100068070 // transcription initiation protein SPT3 homolog //   | LOC100068070 | Cluster0003 |
| 15063411 | XM_001498147 // LOC100068285 // transmembrane protein 236-like // --- // 100068285 //    | LOC100068285 | Cluster0003 |
| 14946518 | ENSECAT00000020857 // LOC100068294 // protein FAM63B-like // --- // 100068294            | LOC100068294 | Cluster0003 |
| 14977362 | XM_001498167 // LOC100068313 // ATP-binding cassette sub-family A member 3-like // ---   | LOC100068313 | Cluster0003 |
| 15100889 | ENSECAT00000022411 // LOC100068403 // uncharacterized protein KIAA0528-like // --- // 1  | LOC100068403 | Cluster0003 |



|          |                                                                                          |              |             |
|----------|------------------------------------------------------------------------------------------|--------------|-------------|
| 14980587 | XM_001498282 // LOC100068441 // putative N-acetylglucosamine-6-phosphate deacetylase-li  | LOC100068441 | Cluster0003 |
| 15108512 | ENSECAT00000016245 // LOC100068522 // AP-3 complex subunit delta-1-like // --- // 10006  | LOC100068522 | Cluster0003 |
| 15037225 | XM_001916263 // LOC100068557 // tyrosine-protein kinase HCK-like // --- // 100068557 //  | LOC100068557 | Cluster0003 |
| 15053657 | XM_001498520 // LOC100068696 // multidrug resistance-associated protein 1-like // --- /  | LOC100068696 | Cluster0003 |
| 14979701 | XM_001498635 // LOC100068821 // methyltransferase-like protein 9-like // --- // 1000688  | LOC100068821 | Cluster0003 |
| 14936106 | ENSECAT00000007574 // LOC100069086 // isocitrate dehydrogenase [NADP], mitochondrial-li  | LOC100069086 | Cluster0003 |
| 15096425 | ENSECAT00000011309 // LOC100069159 // 28S ribosomal protein S35, mitochondrial-like //   | LOC100069159 | Cluster0003 |
| 14989883 | ENSECAT00000022521 // LOC100069170 // thyroid adenoma-associated protein homolog // ---  | LOC100069170 | Cluster0003 |
| 14989918 | ENSECAT00000018766 // LOC100069189 // zinc finger protein 36, C3H1 type-like 2-like //   | LOC100069189 | Cluster0003 |
| 14960851 | XM_001499043 // LOC100069268 // CDK5 regulatory subunit-associated protein 3-like // --  | LOC100069268 | Cluster0003 |
| 15109422 | ENSECAT00000009016 // LOC100069290 // caspase-12-like // --- // 100069290 // XM_001499   | LOC100069290 | Cluster0003 |
| 14977210 | XM_001499300 // LOC100069561 // heat shock protein 75 kDa, mitochondrial-like // --- //  | LOC100069561 | Cluster0003 |
| 15130244 | XM_001499390 // LOC100069653 // myotubularin-related protein 1-like // --- // 100069653  | LOC100069653 | Cluster0003 |
| 15050175 | XM_001499639 // LOC100069929 // torsin-1B-like // --- // 100069929 // ENSECAT000000089   | LOC100069929 | Cluster0003 |
| 15096496 | ENSECAT00000023757 // LOC100070034 // dynamin-1-like protein-like // --- // 100070034 /  | LOC100070034 | Cluster0003 |
| 15061140 | ENSECAT00000019625 // LOC100070283 // platelet-derived growth factor subunit B-like //   | LOC100070283 | Cluster0003 |
| 14954466 | ENSECAT00000007577 // LOC100070296 // protein SMG9-like // --- // 100070296 // XM_0014   | LOC100070296 | Cluster0003 |
| 14946927 | XM_001918205 // LOC100070575 // sorbitol dehydrogenase-like // --- // 100070575 // ENS   | LOC100070575 | Cluster0003 |
| 15023095 | ENSECAT00000022834 // LOC100070978 // nuclear migration protein nudC-like // --- // 100  | LOC100070978 | Cluster0003 |
| 15049599 | ENSECAT00000010586 // LOC100071002 // serine/threonine-protein kinase Nek6-like // ---   | LOC100071002 | Cluster0003 |
| 15078414 | XM_001500729 // LOC100071043 // myoD family inhibitor domain-containing protein-like //  | LOC100071043 | Cluster0003 |
| 14956522 | XM_001915421 // LOC100071075 // midasin-like // --- // 100071075 // ENSECAT00000009278   | LOC100071075 | Cluster0003 |
| 14950827 | XM_001500918 // LOC100071215 // SUMO-activating enzyme subunit 1-like // --- // 1000712  | LOC100071215 | Cluster0003 |
| 15013154 | XM_001501232 // LOC100071466 // uncharacterized LOC100071466 // --- // 100071466 // EN   | LOC100071466 | Cluster0003 |
| 15023348 | ENSECAT000000021482 // LOC100071487 // calcipressin-3-like // --- // 100071487 // XM_00  | LOC100071487 | Cluster0003 |
| 14961814 | ENSECAT00000010739 // LOC100071750 // myosin-Id-like // --- // 100071750 // XM_0015016   | LOC100071750 | Cluster0003 |
| 15049378 | XM_001501609 // LOC100071754 // centriolin-like // --- // 100071754 // ENSECAT000000024  | LOC100071754 | Cluster0003 |
| 14990953 | XM_001918247 // LOC100072177 // neuroblastoma-amplified sequence-like // --- // 1000721  | LOC100072177 | Cluster0003 |
| 14956968 | ENSECAT00000015226 // LOC100072238 // peptidyl-prolyl cis-trans isomerase-like 6-like // | LOC100072238 | Cluster0003 |
| 15105346 | ENSECAT000000011015 // LOC100072304 // sugar phosphate exchanger 2-like // --- // 100072 | LOC100072304 | Cluster0003 |
| 14957087 | ENSECAT00000028978 // LOC100072399 // DNA polymerase zeta catalytic subunit-like // ---  | LOC100072399 | Cluster0003 |
| 14994537 | XM_001502409 // LOC100072474 // TATA box-binding protein-associated factor RNA polymera  | LOC100072474 | Cluster0003 |
| 14982794 | XM_001504289 // LOC100072599 // cell division cycle protein 23 homolog // --- // 100072  | LOC100072599 | Cluster0003 |
| 14985920 | ENSECAT000000021976 // LOC100072674 // transforming growth factor-beta-induced protein i | LOC100072674 | Cluster0003 |
| 14968040 | ENSECAT00000019214 // LOC100072696 // zinc finger ZZ-type and EF-hand domain-containing  | LOC100072696 | Cluster0003 |
| 14953059 | ENSECAT00000010921 // LOC100073006 // probable E3 ubiquitin-protein ligase RNF217-like   | LOC100073006 | Cluster0003 |
| 15026455 | ENSECAT00000006504 // LOC100073027 // aminoacyl tRNA synthase complex-interacting multi  | LOC100073027 | Cluster0003 |
| 14986301 | XM_001503206 // LOC100073058 // phosphorylated adapter RNA export protein-like // --- /  | LOC100073058 | Cluster0003 |
| 14968881 | ENSECAT000000027158 // LOC100073084 // protein SCO1 homolog, mitochondrial-like // --- / | LOC100073084 | Cluster0003 |
| 14968906 | ENSECAT000000027179 // LOC100073102 // zinc phosphodiesterase ELAC protein 2-like // --- | LOC100073102 | Cluster0003 |
| 14983996 | XM_003362887 // LOC100073268 // arylsulfatase B-like // --- // 100073268 // ENSECAT000   | LOC100073268 | Cluster0003 |
| 14987582 | ENSECAT00000010512 // LOC100073301 // methylcrotonoyl-CoA carboxylase beta chain, mitoc  | LOC100073301 | Cluster0003 |
| 15082921 | XM_001914846 // LOC100146184 // WD repeat-containing protein 91-like // --- // 10014618  | LOC100146184 | Cluster0003 |
| 15079860 | XM_003364904 // LOC100146250 // GTPase IMAP family member 5-like // --- // 100146250 //  | LOC100146250 | Cluster0003 |
| 15097736 | ENSECAT00000018874 // LOC100146471 // retinol dehydrogenase 7-like // --- // 100146471   | LOC100146471 | Cluster0003 |
| 15091755 | ENSECAT00000016795 // LOC100146677 // DNA-directed RNA polymerase III subunit RPC7-like  | LOC100146677 | Cluster0003 |
| 14955254 | ENSECAT00000019105 // LOC100147304 // l-amino-acid oxidase-like // --- // 100147304 //   | LOC100147304 | Cluster0003 |
| 15040413 | XM_001916766 // LOC100147308 // fat storage-inducing transmembrane protein 2-like // --  | LOC100147308 | Cluster0003 |
| 15110725 | ENSECAT00000010876 // LOC100147574 // leydig cell tumor 10 kDa protein homolog // --- /  | LOC100147574 | Cluster0003 |
| 14995313 | XM_003363046 // LOC100629236 // eukaryotic translation initiation factor 4E type 3-like  | LOC100629236 | Cluster0003 |
| 15090318 | ENSECAT000000023700 // LOC100629269 // c4b-binding protein alpha chain-like // --- // 10 | LOC100629269 | Cluster0003 |
| 15004651 | ENSECAT00000001214 // LOC100629621 // ubiquitin-like protein 3-like // --- // 100629621  | LOC100629621 | Cluster0003 |
| 15017070 | XM_003364413 // LOC100629945 // uncharacterized LOC100629945 // --- // 100629945 // EN   | LOC100629945 | Cluster0003 |
| 15002296 | ENSECAT000000024736 // LOC100630046 // p2Y purinoceptor 12-like // --- // 100630046 //   | LOC100630046 | Cluster0003 |

|          |                                                                                         |         |             |
|----------|-----------------------------------------------------------------------------------------|---------|-------------|
| 15129681 | ENSECAT00000025985 // LONRF3 // LON peptidase N-terminal domain and ring finger 3 // -- | LONRF3  | Cluster0003 |
| 15105697 | ENSECAT00000023701 // LPHN1 // latrophilin 1 // --- // --- // ENSECAT00000023703 // LP  | LPHN1   | Cluster0003 |
| 15119641 | ENSECAT00000007256 // LPIN2 // lipin 2 // --- // 100051300                              | LPIN2   | Cluster0003 |
| 15097754 | ENSECAT00000013743 // LRP1 // low density lipoprotein receptor-related protein 1 // --- | LRP1    | Cluster0003 |
| 14989846 | ENSECAT00000025535 // LRPPRC // leucine-rich pentatricopeptide repeat containing // --- | LRPPRC  | Cluster0003 |
| 14936403 | XM_001489861 // LRRK1 // leucine-rich repeat kinase 1 // --- // 100050271 // ENSECAT00  | LRRK1   | Cluster0003 |
| 15022334 | ENSECAT00000017611 // MACF1 // microtubule-actin crosslinking factor 1 // --- // 100068 | MACF1   | Cluster0003 |
| 14969794 | XM_003362595 // MADD // MAP-kinase activating death domain // --- // 100051327 // ENSE  | MADD    | Cluster0003 |
| 14957335 | XM_001502930 // MAN1A1 // mannosidase, alpha, class 1A, member 1 // --- // 100072869 // | MAN1A1  | Cluster0003 |
| 15035333 | ENSECAT00000007112 // MAP3K1 // mitogen-activated protein kinase kinase kinase 1, E3 ub | MAP3K1  | Cluster0003 |
| 14989961 | XM_001499556 // MAP4K3 // mitogen-activated protein kinase kinase kinase kinase 3 // -- | MAP4K3  | Cluster0003 |
| 15028238 | ENSECAT00000015735 // MAPK14 // mitogen-activated protein kinase 14 // --- // 100063532 | MAPK14  | Cluster0003 |
| 14979415 | ENSECAT00000015512 // MAPK3 // mitogen-activated protein kinase 3 // --- // 100066173 / | MAPK3   | Cluster0003 |
| 14998572 | XM_001488737 // MBNL1 // muscleblind-like splicing regulator 1 // --- // 100050018 //   | MBNL1   | Cluster0003 |
| 15004168 | ENSECAT00000018395 // MCF2L // MCF.2 cell line derived transforming sequence-like // -- | MCF2L   | Cluster0003 |
| 15055672 | ENSECAT00000020592 // MCM3AP // minichromosome maintenance complex component 3 associat | MCM3AP  | Cluster0003 |
| 14936314 | ENSECAT00000024451 // MCTP2 // multiple C2 domains, transmembrane 2 // --- // 100049873 | MCTP2   | Cluster0003 |
| 15017433 | XM_001503934 // MECR // mitochondrial trans-2-enoyl-CoA reductase // --- // 100070598 / | MECR    | Cluster0003 |
| 15094444 | ENSECAT00000005458 // MFF // mitochondrial fission factor // --- // 100056853           | MFF     | Cluster0003 |
| 15068519 | XM_001488157 // MFSD7 // major facilitator superfamily domain containing 7 // --- // 10 | MFSD7   | Cluster0003 |
| 15006466 | XM_001489097 // MGAT5 // mannosyl (alpha-1,6-)-glycoprotein beta-1,6-N-acetyl-glucosami | MGAT5   | Cluster0003 |
| 15076622 | XM_001915160 // MLL5 // myeloid/lymphoid or mixed-lineage leukemia 5 (trithorax homolog | MLL5    | Cluster0003 |
| 15063383 | XM_001497471 // MRC1 // mannose receptor, C type 1 // --- // 100068247 // ENSECAT00000  | MRC1    | Cluster0003 |
| 15044756 | XM_001499131 // MTHFD1 // methylenetetrahydrofolate dehydrogenase (NADP+ dependent) 1,  | MTHFD1  | Cluster0003 |
| 15076110 | ENSECAT00000001146 // MTHFD1L // methylenetetrahydrofolate dehydrogenase (NADP+ depende | MTHFD1L | Cluster0003 |
| 15130232 | ENSECAT00000016970 // MTM1 // myotubularin 1 // --- // 100069680 // XM_001505085 // MT  | MTM1    | Cluster0003 |
| 15018568 | ENSECAT00000017925 // MTOR // mechanistic target of rapamycin (serine/threonine kinase) | MTOR    | Cluster0003 |
| 14975955 | XM_001501685 // MVP // major vault protein // --- // 100063984 // ENSECAT00000027087 /  | MVP     | Cluster0003 |
| 14967469 | XM_003362429 // MYO18A // myosin XVIII // --- // 100059638 // ENSECAT00000022672 // M   | MYO18A  | Cluster0003 |
| 15106484 | ENSECAT00000018321 // MYO1F // myosin IF // --- // --- // ENSECAT00000018418 // MYO1F   | MYO1F   | Cluster0003 |
| 14937157 | ENSECAT00000017832 // MYO9A // myosin IXA // --- // 100052350                           | MYO9A   | Cluster0003 |
| 14987636 | ENSECAT00000003247 // NAIP // NLR family, apoptosis inhibitory protein // --- // 100073 | NAIP    | Cluster0003 |
| 14969390 | ENSECAT00000012721 // NAT10 // N-acetyltransferase 10 (GCN5-related) // --- // ---      | NAT10   | Cluster0003 |
| 15073786 | ENSECAT00000016536 // NAV1 // neuron navigator 1 // --- // ---                          | NAV1    | Cluster0003 |
| 14994258 | XM_001503106 // NCOA1 // nuclear receptor coactivator 1 // --- // 100056042 // XM_0033  | NCOA1   | Cluster0003 |
| 15121053 | XM_001493237 // NCOA2 // nuclear receptor coactivator 2 // --- // 100051656 // ENSECAT  | NCOA2   | Cluster0003 |
| 14935474 | XM_001494039 // NCOA4 // nuclear receptor coactivator 4 // --- // 100062485 // ENSECAT  | NCOA4   | Cluster0003 |
| 14937919 | ENSECAT00000010394 // NEDD4 // neural precursor cell expressed, developmentally down-re | NEDD4   | Cluster0003 |
| 14967157 | ENSECAT00000009831 // NF1 // neurofibromin 1 // --- // 100071896                        | NF1     | Cluster0003 |
| 15042382 | XM_001499262 // NFX1 // nuclear transcription factor, X-box binding 1 // --- // 1000537 | NFX1    | Cluster0003 |
| 15064236 | ENSECAT00000015396 // NLRC5 // NLR family, CARD domain containing 5 // --- // ---       | NLRC5   | Cluster0003 |
| 15082100 | ENSECAT00000014494 // NOD1 // nucleotide-binding oligomerization domain containing 1 // | NOD1    | Cluster0003 |
| 14991061 | XM_001918262 // NOL10 // nucleolar protein 10 // --- // 100057037 // ENSECAT0000001649  | NOL10   | Cluster0003 |
| 15018831 | ENSECAT00000013774 // NOL9 // nucleolar protein 9 // --- // ---                         | NOL9    | Cluster0003 |
| 15080078 | ENSECAT00000007782 // NOM1 // nucleolar protein with MIF4G domain 1 // --- // ---       | NOM1    | Cluster0003 |
| 15068321 | XM_001489809 // NOP14 // NOP14 nucleolar protein homolog (yeast) // --- // 100051519 // | NOP14   | Cluster0003 |
| 15008186 | XM_001497246 // NOP58 // NOP58 ribonucleoprotein homolog (yeast) // --- // 100067129 // | NOP58   | Cluster0003 |
| 15087188 | ENSECAT00000016738 // NOTCH2 // notch 2 // --- // 100067078 // XM_001497204 // NOTCH2   | NOTCH2  | Cluster0003 |
| 15115708 | XM_001490178 // NPC1 // Niemann-Pick disease, type C1 // --- // 100059175 // ENSECAT00  | NPC1    | Cluster0003 |
| 15054820 | NM_001256955 // NRIP1 // nuclear receptor interacting protein 1 // --- // 100054242 //  | NRIP1   | Cluster0003 |
| 14984469 | XM_001502429 // NSD1 // nuclear receptor binding SET domain protein 1 // --- // 1000585 | NSD1    | Cluster0003 |
| 14952873 | XM_001502648 // NT5DC1 // 5'-nucleotidase domain containing 1 // --- // 100072637 // E  | NT5DC1  | Cluster0003 |
| 15070651 | ENSECAT00000020843 // NUDT9 // nudix (nucleoside diphosphate linked moiety X)-type moti | NUDT9   | Cluster0003 |
| 14972534 | XM_001491461 // NUP160 // nucleoporin 160kDa // --- // 100058528 // ENSECAT00000023778  | NUP160  | Cluster0003 |

|          |                                                                                          |          |             |
|----------|------------------------------------------------------------------------------------------|----------|-------------|
| 15050095 | XM_001499796 // NUP188 // nucleoporin 188kDa // --- // 100070114 /// ENSECAT00000007360  | NUP188   | Cluster0003 |
| 15127006 | ENSECAT00000015763 // OFD1 // oral-facial-digital syndrome 1 // --- // ---               | OFD1     | Cluster0003 |
| 15029439 | ENSECAT000000025473 // OGFRL1 // opioid growth factor receptor-like 1 // --- // 10007108 | OGFRL1   | Cluster0003 |
| 15012355 | ENSECAT000000026313 // OPA1 // optic atrophy 1 (autosomal dominant) // --- // 100059993  | OPA1     | Cluster0003 |
| 15059926 | XM_001491827 // OSBPL8 // oxysterol binding protein-like 8 // --- // 100059086 /// ENSE  | OSBPL8   | Cluster0003 |
| 15114775 | XM_001492153 // P2RX4 // purinergic receptor P2X, ligand-gated ion channel, 4 // --- //  | P2RX4    | Cluster0003 |
| 15114762 | XM_001495572 // P2RX7 // purinergic receptor P2X, ligand-gated ion channel, 7 // --- //  | P2RX7    | Cluster0003 |
| 15016731 | XM_001503450 // PABPC4 // poly(A) binding protein, cytoplasmic 4 (inducible form) // --  | PABPC4   | Cluster0003 |
| 15018328 | ENSECAT000000023886 // PAD12 // peptidyl arginine deiminase, type II // --- // 100050025 | PAD12    | Cluster0003 |
| 15026760 | XM_001491437 // PAK1IIP1 // PAK1 interacting protein 1 // --- // 100051197 /// ENSECAT00 | PAK1IIP1 | Cluster0003 |
| 15025216 | ENSECAT000000024847 // PALLD // palladin, cytoskeletal associated protein // --- // 1000 | PALLD    | Cluster0003 |
| 15102698 | XM_001504835 // PAN2 // PAN2 poly(A) specific ribonuclease subunit homolog (S. cerevisi  | PAN2     | Cluster0003 |
| 15036175 | XM_001501188 // PAPD7 // PAP associated domain containing 7 // --- // 100071429 /// ENS  | PAPD7    | Cluster0003 |
| 15021189 | XM_001503578 // PAPSS1 // 3 -phosphoadenosine 5 -phosphosulfate synthase 1 // --- // 10  | PAPSS1   | Cluster0003 |
| 14995999 | ENSECAT000000004449 // PBRM1 // polybromo 1 // --- // 100051687                          | PBRM1    | Cluster0003 |
| 14998166 | XM_001496380 // PCCB // propionyl CoA carboxylase, beta polypeptide // --- // 100065950  | PCCB     | Cluster0003 |
| 14992663 | ENSECAT00000016266 // PCYOX1 // prenylcysteine oxidase 1 // --- // ---                   | PCYOX1   | Cluster0003 |
| 14941901 | ENSECAT000000022542 // PDCD11 // programmed cell death 11 // --- // 100034019            | PDCD11   | Cluster0003 |
| 14953555 | XM_001490241 // PEPD // peptidase D // --- // 100056540 /// ENSECAT00000025611 // PEPD   | PEPD     | Cluster0003 |
| 15010915 | ENSECAT000000021411 // PGAP1 // post-GPI attachment to proteins 1 // --- // 100070459 // | PGAP1    | Cluster0003 |
| 14967435 | XM_001504186 // PHF12 // PHD finger protein 12 // --- // 100059567 /// ENSECAT000000176  | PHF12    | Cluster0003 |
| 15126240 | XM_001914744 // PHF8 // PHD finger protein 8 // --- // 100060410 /// ENSECAT00000029154  | PHF8     | Cluster0003 |
| 15063854 | NM_001163825 // PHKB // phosphorylase kinase, beta // --- // 100050040 /// ENSECAT00000  | PHKB     | Cluster0003 |
| 15116792 | XM_001915101 // PHLPP1 // PH domain and leucine rich repeat protein phosphatase 1 // --  | PHLPP1   | Cluster0003 |
| 15080148 | ENSECAT000000017074 // PHTF2 // putative homeodomain transcription factor 2 // --- // 10 | PHTF2    | Cluster0003 |
| 15072859 | ENSECAT000000008955 // PIGG // phosphatidylinositol glycan anchor biosynthesis, class G  | PIGG     | Cluster0003 |
| 15001641 | XM_001496778 // PIK3R4 // phosphoinositide-3-kinase, regulatory subunit 4 // --- // 100  | PIK3R4   | Cluster0003 |
| 14960712 | XM_001501544 // PIP4K2B // phosphatidylinositol-5-phosphate 4-kinase, type II, beta //   | PIP4K2B  | Cluster0003 |
| 14959184 | NM_001163878 // PITPNC1 // phosphatidylinositol transfer protein, cytoplasmic 1 // ---   | PITPNC1  | Cluster0003 |
| 14939209 | XM_001918300 // PLCB2 // phospholipase C, beta 2 // --- // 100057315 /// ENSECAT00000002 | PLCB2    | Cluster0003 |
| 15065525 | XM_001501998 // PLCG2 // phospholipase C, gamma 2 (phosphatidylinositol-specific) // --  | PLCG2    | Cluster0003 |
| 15001570 | ENSECAT000000010359 // PLCL2 // phospholipase C-like 2 // --- // 100063395 /// XM_001917 | PLCL2    | Cluster0003 |
| 14955063 | XM_001489167 // PLEKHA4 // pleckstrin homology domain containing, family A (phosphoino   | PLEKHA4  | Cluster0003 |
| 15002129 | XM_001493103 // PLOD2 // procollagen-lysine, 2-oxoglutarate 5-dioxygenase 2 // --- // 1  | PLOD2    | Cluster0003 |
| 15063306 | XM_001496595 // PLXDC2 // plexin domain containing 2 // --- // 100055892 /// ENSECAT000  | PLXDC2   | Cluster0003 |
| 14988666 | ENSECAT000000011191 // POLR1A // polymerase (RNA) I polypeptide A, 194kDa // --- // 1000 | POLR1A   | Cluster0003 |
| 14988448 | XM_001495461 // POLR1B // polymerase (RNA) I polypeptide B, 128kDa // --- // 100052113   | POLR1B   | Cluster0003 |
| 14943692 | XM_001503996 // POLR3A // polymerase (RNA) III (DNA directed) polypeptide A, 155kDa //   | POLR3A   | Cluster0003 |
| 15082609 | ENSECAT000000009237 // POT1 // protection of telomeres 1 homolog (S. pombe) // --- // 10 | POT1     | Cluster0003 |
| 14993330 | XM_003362999 // PPM1B // protein phosphatase, Mg2+/Mn2+ dependent, 1B // --- // 1000535  | PPM1B    | Cluster0003 |
| 15103134 | ENSECAT000000009257 // PPM1H // protein phosphatase, Mg2+/Mn2+ dependent, 1H // --- // 1 | PPM1H    | Cluster0003 |
| 15066119 | XM_001497487 // PPP3CA // protein phosphatase 3, catalytic subunit, alpha isozyme // --  | PPP3CA   | Cluster0003 |
| 14956862 | XM_001501777 // PREP // prolyl endopeptidase // --- // 100071926 /// ENSECAT000000025507 | PREP     | Cluster0003 |
| 15083648 | ENSECAT000000013580 // PRKAG2 // protein kinase, AMP-activated, gamma 2 non-catalytic su | PRKAG2   | Cluster0003 |
| 14959145 | XM_001494589 // PRKC // protein kinase C, alpha // --- // 100063318 /// ENSECAT00000000  | PRKC     | Cluster0003 |
| 15044590 | XM_001498126 // PRKCH // protein kinase C, eta // --- // 100051560 /// ENSECAT000000147  | PRKCH    | Cluster0003 |
| 15013909 | XM_001493497 // PRKCSH // protein kinase C substrate 80K-H // --- // 100057774 /// XM_0  | PRKCSH   | Cluster0003 |
| 15054677 | XM_001489273 // PRMT2 // protein arginine methyltransferase 2 // --- // 100054798 /// E  | PRMT2    | Cluster0003 |
| 14943342 | XM_001503764 // PSAP // prosaposin // --- // 100063520 /// ENSECAT000000023432 // PSAP / | PSAP     | Cluster0003 |
| 15043637 | NM_001082513 // PSIP1 // PC4 and SFRS1 interacting protein 1 // --- // 100034217 /// EN  | PSIP1    | Cluster0003 |
| 15124874 | ENSECAT000000016200 // PTK2 // PTK2 protein tyrosine kinase 2 // --- // ---              | PTK2     | Cluster0003 |
| 15022885 | ENSECAT000000012816 // PTPRU // protein tyrosine phosphatase, receptor type, U // --- // | PTPRU    | Cluster0003 |
| 14989474 | ENSECAT000000014833 // PUS10 // pseudouridylylase 10 // --- // 100052053                 | PUS10    | Cluster0003 |
| 15036350 | XM_001490567 // PYGB // phosphorylase, glycogen; brain // --- // 100057085 /// ENSECAT0  | PYGB     | Cluster0003 |

|          |                                                                                           |          |             |
|----------|-------------------------------------------------------------------------------------------|----------|-------------|
| 15075141 | ENSECAT00000018574 // QKI // QKI, KH domain containing, RNA binding // --- // 100033866   | QKI      | Cluster0003 |
| 15000143 | XM_001495092 // RAD54L2 // RAD54-like 2 (S. cerevisiae) // --- // 100052240 /// ENSECAT   | RAD54L2  | Cluster0003 |
| 14995024 | XM_001492240 // RAF1 // v-raf-1 murine leukemia viral oncogene homolog 1 // --- // 1000   | RAF1     | Cluster0003 |
| 14948698 | ENSECAT00000026965 // RALGAPA1 // Ral GTPase activating protein, alpha subunit 1 (catal   | RALGAPA1 | Cluster0003 |
| 15036443 | XM_001489543 // RALGAPA2 // Ral GTPase activating protein, alpha subunit 2 (catalytic)    | RALGAPA2 | Cluster0003 |
| 14983173 | ENSECAT00000022661 // RAPGEF6 // Rap guanine nucleotide exchange factor (GEF) 6 // ---    | RAPGEF6  | Cluster0003 |
| 14984827 | XM_001503271 // RARS // arginyl-tRNA synthetase // --- // 100059383 /// ENSECAT000000026  | RARS     | Cluster0003 |
| 15084530 | NM_001163972 // RASAL2 // RAS protein activator like 2 // --- // 100033986 /// ENSECAT0   | RASAL2   | Cluster0003 |
| 15040236 | XM_001499515 // RBL1 // retinoblastoma-like 1 (p107) // --- // 100069786 /// ENSECAT000   | RBL1     | Cluster0003 |
| 15064045 | XM_001492689 // RBL2 // retinoblastoma-like 2 (p130) // --- // 100060431 /// ENSECAT000   | RBL2     | Cluster0003 |
| 15114473 | XM_001491957 // RBM19 // RNA binding motif protein 19 // --- // 100056226 /// ENSECAT00   | RBM19    | Cluster0003 |
| 15082669 | ENSECAT00000008258 // RBM28 // RNA binding motif protein 28 // --- // 100071725 /// XM_   | RBM28    | Cluster0003 |
| 15000337 | XM_001496699 // RBM6 // RNA binding motif protein 6 // --- // 100052591 /// ENSECAT0000   | RBM6     | Cluster0003 |
| 15003226 | ENSECAT000000023524 // RCBTB1 // regulator of chromosome condensation (RCC1) and BTB (PO  | RCBTB1   | Cluster0003 |
| 15046321 | ENSECAT00000012690 // RCOR1 // REST corepressor 1 // --- // 100058618 /// XM_001491522    | RCOR1    | Cluster0003 |
| 15018772 | XM_001915530 // RERE // arginine-glutamic acid dipeptide (RE) repeats // --- // 1000519   | RERE     | Cluster0003 |
| 14988016 | XM_001490099 // REV1 // REV1, polymerase (DNA directed) // --- // 100050347 /// ENSECAT   | REV1     | Cluster0003 |
| 14961776 | ENSECAT000000016306 // RFFL // ring finger and FYVE-like domain containing E3 ubiquitin   | RFFL     | Cluster0003 |
| 15086797 | ENSECAT000000026716 // RFX5 // regulatory factor X, 5 (influences HLA class II expressio  | RFX5     | Cluster0003 |
| 14937909 | ENSECAT000000002772 // RFX7 // regulatory factor X, 7 // --- // 100054682 /// XM_0015007  | RFX7     | Cluster0003 |
| 15076646 | ENSECAT000000019909 // RINT1 // RAD50 interactor 1 // --- // 100050455 /// XM_001914893   | RINT1    | Cluster0003 |
| 15026677 | XM_001490360 // RIOK1 // RIO kinase 1 (yeast) // --- // 100050980 /// ENSECAT00000000957  | RIOK1    | Cluster0003 |
| 15089840 | NM_001089586 // RNASEL // ribonuclease L (2 ,5 -oligoisoadenylate synthetase-dependent)   | RNASEL   | Cluster0003 |
| 15000360 | ENSECAT000000024935 // RNF123 // ring finger protein 123 // --- // 100053010              | RNF123   | Cluster0003 |
| 15026945 | ENSECAT000000002824 // RNF144B // ring finger protein 144B // --- // 100052124 /// XM_00  | RNF144B  | Cluster0003 |
| 14979202 | ENSECAT000000011634 // RNF40 // ring finger protein 40, E3 ubiquitin protein ligase // -  | RNF40    | Cluster0003 |
| 15115781 | NM_001163985 // ROCK1 // Rho-associated, coiled-coil containing protein kinase 1 // ---   | ROCK1    | Cluster0003 |
| 14956511 | XM_001500697 // RRAGD // Ras-related GTP binding D // --- // 100071018 /// ENSECAT000000  | RRAGD    | Cluster0003 |
| 15091114 | ENSECAT000000025221 // RUSC1 // RUN and SH3 domain containing 1 // --- // ---             | RUSC1    | Cluster0003 |
| 15114096 | ENSECAT000000000594 // SART3 // squamous cell carcinoma antigen recognized by T cells 3   | SART3    | Cluster0003 |
| 15061763 | ENSECAT000000024091 // SBF1 // SET binding factor 1 // --- // 100056491                   | SBF1     | Cluster0003 |
| 15112648 | ENSECAT000000025304 // SBF2 // SET binding factor 2 // --- // 100055769 /// ENSECAT000000 | SBF2     | Cluster0003 |
| 14945704 | ENSECAT000000018533 // SCAPER // S-phase cyclin A-associated protein in the ER // --- //  | SCAPER   | Cluster0003 |
| 15067342 | ENSECAT000000003387 // SCFD2 // sec1 family domain containing 2 // --- // 100060187 ///   | SCFD2    | Cluster0003 |
| 15029563 | ENSECAT000000010506 // SERPINB1 // serpin peptidase inhibitor, clade B (ovalbumin), memb  | SERPINB1 | Cluster0003 |
| 15010479 | ENSECAT000000012633 // SESTD1 // SEC14 and spectrin domains 1 // --- // 100067450 /// XM  | SESTD1   | Cluster0003 |
| 15064466 | ENSECAT000000008835 // SETD6 // SET domain containing 6 // --- // --- /// ENSECAT00000000 | SETD6    | Cluster0003 |
| 14934146 | XM_001503226 // SGMS1 // sphingomyelin synthase 1 // --- // 100062484 /// ENSECAT00000000 | SGMS1    | Cluster0003 |
| 14962359 | XM_001918353 // SGSM2 // small G protein signaling modulator 2 // --- // 100072485 ///    | SGSM2    | Cluster0003 |
| 15110265 | ENSECAT000000014843 // SIAE // sialic acid acetyltransferase // --- // 100072250          | SIAE     | Cluster0003 |
| 15037044 | ENSECAT000000002328 // SIRPB2 // signal-regulatory protein beta 2 // --- // ---           | SIRPB2   | Cluster0003 |
| 15035389 | ENSECAT000000025806 // SKIV2L2 // superkiller viralicidic activity 2-like 2 (S. cerevisi  | SKIV2L2  | Cluster0003 |
| 14973012 | XM_001916178 // SLC15A3 // solute carrier family 15, member 3 // --- // 100062045 /// E   | SLC15A3  | Cluster0003 |
| 15099120 | ENSECAT000000019696 // SLC16A14 // solute carrier family 16, member 14 (monocarboxylic a  | SLC16A14 | Cluster0003 |
| 14986121 | ENSECAT000000023412 // SLC22A5 // solute carrier family 22 (organic cation/carnitine tra  | SLC22A5  | Cluster0003 |
| 15036814 | ENSECAT000000015857 // SLC23A2 // solute carrier family 23 (nucleobase transporters), me  | SLC23A2  | Cluster0003 |
| 15081547 | XM_001494425 // SLC25A13 // solute carrier family 25 (aspartate/glutamate carrier), mem   | SLC25A13 | Cluster0003 |
| 15101311 | XM_001915404 // SLC2A13 // solute carrier family 2 (facilitated glucose transporter), m   | SLC2A13  | Cluster0003 |
| 15019160 | ENSECAT000000001557 // SLC35E2 // solute carrier family 35, member E2 // --- // ---       | SLC35E2  | Cluster0003 |
| 15004629 | ENSECAT000000011800 // SLC46A3 // solute carrier family 46, member 3 // --- // 100062949  | SLC46A3  | Cluster0003 |
| 15072570 | XM_001488793 // SLC6A4 // solute carrier family 6 (neurotransmitter transporter, seroto   | SLC6A4   | Cluster0003 |
| 14989940 | DQ178640 // SLC8A1 // solute carrier family 8 (sodium/calcium exchanger), member 1 // -   | SLC8A1   | Cluster0003 |
| 15130065 | ENSECAT000000020591 // SLC9A6 // solute carrier family 9, subfamily A (NHE6, cation prot  | SLC9A6   | Cluster0003 |
| 15111842 | NM_001081789 // SLCO2B1 // solute carrier organic anion transporter family, member 2B1    | SLCO2B1  | Cluster0003 |

|          |                                                                                          |         |             |
|----------|------------------------------------------------------------------------------------------|---------|-------------|
| 15041841 | ENSECAT00000026435 // SMARCA2 // SWI/SNF related, matrix associated, actin dependent re  | SMARCA2 | Cluster0003 |
| 15105089 | ENSECAT00000021013 // SORL1 // sortilin-related receptor, L(DLR class) A repeats contai  | SORL1   | Cluster0003 |
| 15087730 | XM_001917352 // SORT1 // sortilin 1 // --- // 100061385 /// ENSECAT00000016625 // SORT1  | SORT1   | Cluster0003 |
| 15102236 | ENSECAT00000017267 // SPRYD3 // SPRY domain containing 3 // --- // 100056536 /// XM_001  | SPRYD3  | Cluster0003 |
| 15039319 | XM_001492503 // SPTLC3 // serine palmitoyltransferase, long chain base subunit 3 // ---  | SPTLC3  | Cluster0003 |
| 14946851 | XM_001500135 // SQRDL // sulfide quinone reductase-like (yeast) // --- // 100070480 ///  | SQRDL   | Cluster0003 |
| 14989805 | ENSECAT00000014562 // SRBD1 // S1 RNA binding domain 1 // --- // 100068692 /// XM_00149  | SRBD1   | Cluster0003 |
| 15031300 | XM_001499381 // SRPK1 // SRSF protein kinase 1 // --- // 100063400 /// ENSECAT000000152  | SRPK1   | Cluster0003 |
| 15080357 | ENSECAT00000011176 // SRPK2 // SRSF protein kinase 2 // --- // 100050379 /// XM_0014896  | SRPK2   | Cluster0003 |
| 14966449 | NM_001195548 // SRSF1 // serine/arginine-rich splicing factor 1 // --- // 100056763 ///  | SRSF1   | Cluster0003 |
| 14967542 | XM_001502056 // SSH2 // slingshot homolog 2 (Drosophila) // --- // 100072180 /// ENSECA  | SSH2    | Cluster0003 |
| 15124747 | XM_001498838 // ST3GAL1 // ST3 beta-galactoside alpha-2,3-sialyltransferase 1 // --- //  | ST3GAL1 | Cluster0003 |
| 15100883 | XM_001502320 // ST8SIA1 // ST8 alpha-N-acetylneuraminide alpha-2,8-sialyltransferase 1   | ST8SIA1 | Cluster0003 |
| 15001844 | ENSECAT00000025069 // STAG1 // stromal antigen 1 // --- // 100066027 /// XM_001496443 /  | STAG1   | Cluster0003 |
| 15107241 | XM_001499852 // STIM1 // stromal interaction molecule 1 // --- // 100053079 /// ENSECAT  | STIM1   | Cluster0003 |
| 15094301 | ENSECAT00000018591 // STK11IP // serine/threonine kinase 11 interacting protein // ---   | STK11IP | Cluster0003 |
| 15123923 | XM_001492746 // STK3 // serine/threonine kinase 3 // --- // 100060508 /// ENSECAT0000000 | STK3    | Cluster0003 |
| 14961216 | XM_001503277 // STXBP4 // syntaxin binding protein 4 // --- // 100056587 /// ENSECAT000  | STXBP4  | Cluster0003 |
| 14995422 | XM_001495004 // SUCLG2 // succinate-CoA ligase, GDP-forming, beta subunit // --- // 100  | SUCLG2  | Cluster0003 |
| 14942012 | XM_001498704 // SUFU // suppressor of fused homolog (Drosophila) // --- // 100059929 //  | SUFU    | Cluster0003 |
| 15034854 | XM_001503418 // SUGP2 // SURP and G patch domain containing 2 // --- // 100071102 /// E  | SUGP2   | Cluster0003 |
| 14995199 | ENSECAT00000021716 // SUMF1 // sulfatase modifying factor 1 // --- // 100052857 /// XM_  | SUMF1   | Cluster0003 |
| 14978265 | ENSECAT00000018761 // SUN1 // Sad1 and UNC84 domain containing 1 // --- // --- /// ENSE  | SUN1    | Cluster0003 |
| 14947941 | XM_001505160 // SUPT16H // suppressor of Ty 16 homolog (S. cerevisiae) // --- // 100059  | SUPT16H | Cluster0003 |
| 15062973 | XM_001494423 // SVIL // supervillin // --- // 100063045 /// ENSECAT00000022469 // SVIL   | SVIL    | Cluster0003 |
| 14954663 | ENSECAT00000008705 // SYMPK // symplekin // --- // --- /// ENSECAT00000008770 // SYMPK   | SYMPK   | Cluster0003 |
| 15055130 | ENSECAT00000006588 // SYNJ1 // synaptojanin 1 // --- // 100052605 /// ENSECAT0000000659  | SYNJ1   | Cluster0003 |
| 15056961 | ENSECAT00000015644 // TACC1 // transforming, acidic coiled-coil containing protein 1 //  | TACC1   | Cluster0003 |
| 14961661 | XM_001503840 // TADA2A // transcriptional adaptor 2A // --- // 100057641 /// ENSECAT000  | TADA2A  | Cluster0003 |
| 15075701 | ENSECAT00000022234 // TAGAP // T-cell activation RhoGTPase activating protein // --- //  | TAGAP   | Cluster0003 |
| 15006903 | ENSECAT00000020014 // TANC1 // tetratricopeptide repeat, ankyrin repeat and coiled-coil  | TANC1   | Cluster0003 |
| 15050974 | ENSECAT00000013996 // TANK // TRAF family member-associated NFKB activator // --- // 10  | TANK    | Cluster0003 |
| 14935304 | XM_001916573 // TARBP1 // TAR (HIV-1) RNA binding protein 1 // --- // 100059375 /// ENS  | TARBP1  | Cluster0003 |
| 15071937 | ENSECAT00000024010 // TBC1D1 // TBC1 (tre-2/USP6, BUB2, cdc16) domain family, member 1   | TBC1D1  | Cluster0003 |
| 15068209 | ENSECAT00000005488 // TBC1D14 // TBC1 domain family, member 14 // --- // 100070312 ///   | TBC1D14 | Cluster0003 |
| 14945627 | ENSECAT00000026577 // TBC1D2B // TBC1 domain family, member 2B // --- // 100060015 ///   | TBC1D2B | Cluster0003 |
| 14981341 | ENSECAT00000018936 // TBC1D9B // TBC1 domain family, member 9B (with GRAM domain) // --  | TBC1D9B | Cluster0003 |
| 15014304 | XM_001499222 // TBCCD1 // TBCC domain containing 1 // --- // 100059422 /// ENSECAT00000  | TBCCD1  | Cluster0003 |
| 15013963 | ENSECAT00000008912 // TBL1XR1 // transducin (beta)-like 1 X-linked receptor 1 // --- //  | TBL1XR1 | Cluster0003 |
| 15046300 | ENSECAT00000022829 // TECPR2 // tectonin beta-propeller repeat containing 2 // --- // 1  | TECPR2  | Cluster0003 |
| 14947820 | XM_001505130 // TEP1 // telomerase-associated protein 1 // --- // 100072576 /// ENSECAT  | TEP1    | Cluster0003 |
| 15012507 | NM_001081913 // TFRC // transferrin receptor (p90, CD71) // --- // 100034089 /// ENSECA  | TFRC    | Cluster0003 |
| 15001420 | ENSECAT00000016147 // TGFBR2 // transforming growth factor, beta receptor II (70/80kDa)  | TGFBR2  | Cluster0003 |
| 15055033 | XM_001498833 // TIAM1 // T-cell lymphoma invasion and metastasis 1 // --- // 100052764   | TIAM1   | Cluster0003 |
| 14937228 | ENSECAT00000007482 // TLE3 // transducin-like enhancer of split 3 (E(sp1) homolog, Dros  | TLE3    | Cluster0003 |
| 15009919 | XM_001498377 // TLK1 // tousled-like kinase 1 // --- // 100052963 /// ENSECAT0000002473  | TLK1    | Cluster0003 |
| 15051296 | ENSECAT00000019115 // TLN1 // talin 1 // --- // --- /// ENSECAT00000019221 // TLN1 // t  | TLN1    | Cluster0003 |
| 15067746 | NM_001257142 // TLR6 // toll-like receptor 6 // --- // 100064554 /// ENSECAT00000001932  | TLR6    | Cluster0003 |
| 15101040 | XM_001502786 // TM7SF3 // transmembrane 7 superfamily member 3 // --- // 100069046 ///   | TM7SF3  | Cluster0003 |
| 15064919 | ENSECAT00000016960 // TMCO7 // transmembrane and coiled-coil domains 7 // --- // 100066  | TMCO7   | Cluster0003 |
| 15096682 | XM_001488535 // TMEM117 // transmembrane protein 117 // --- // 100050185 /// ENSECAT000  | TMEM117 | Cluster0003 |
| 14988115 | ENSECAT00000008072 // TMEM131 // transmembrane protein 131 // --- // 100061749 /// XM_0  | TMEM131 | Cluster0003 |
| 15111557 | ENSECAT00000007695 // TMEM135 // transmembrane protein 135 // --- // 100060782           | TMEM135 | Cluster0003 |
| 15028907 | ENSECAT00000014451 // TMEM63B // transmembrane protein 63B // --- // 100067695           | TMEM63B | Cluster0003 |

|          |                                                                                          |          |             |
|----------|------------------------------------------------------------------------------------------|----------|-------------|
| 14988402 | ENSECAT00000015896 // TMEM87B // transmembrane protein 87B // --- // 100064755 /// XM_0  | TMEM87B  | Cluster0003 |
| 15058310 | ENSECAT00000025320 // TMPO // thymopoietin // --- // ---                                 | TMPO     | Cluster0003 |
| 15101091 | ENSECAT00000008820 // TMTC1 // transmembrane and tetratricopeptide repeat containing 1   | TMTC1    | Cluster0003 |
| 15019073 | ENSECAT00000008962 // TNFRSF14 // tumor necrosis factor receptor superfamily, member 14  | TNFRSF14 | Cluster0003 |
| 15013883 | XM_001492782 // TNIK // TRAF2 and NCK interacting kinase // --- // 100057722 /// XM_003  | TNIK     | Cluster0003 |
| 15082744 | ENSECAT00000013691 // TNPO3 // transportin 3 // --- // ---                               | TNPO3    | Cluster0003 |
| 14978943 | XM_001493663 // TPST1 // tyrosylprotein sulfotransferase 1 // --- // 100061873 /// ENSE  | TPST1    | Cluster0003 |
| 15059737 | XM_001914876 // TRABD // TraB domain containing // --- // 100147257 /// ENSECAT000000023 | TRABD    | Cluster0003 |
| 15000886 | ENSECAT00000015724 // TRAK1 // trafficking protein, kinesin binding 1 // --- // 1000676  | TRAK1    | Cluster0003 |
| 15016697 | XM_001498287 // TRIT1 // tRNA isopentenyltransferase 1 // --- // 100068446 /// ENSECAT0  | TRIT1    | Cluster0003 |
| 14953099 | XM_001503142 // TRMT11 // tRNA methyltransferase 11 homolog (S. cerevisiae) // --- // 1  | TRMT11   | Cluster0003 |
| 15054457 | ENSECAT00000025586 // TRPM2 // transient receptor potential cation channel, subfamily M  | TRPM2    | Cluster0003 |
| 14977875 | ENSECAT00000011311 // TRRAP // transformation/transcription domain-associated protein /  | TRRAP    | Cluster0003 |
| 14980725 | ENSECAT00000023586 // TSC2 // tuberous sclerosis 2 // --- // 100065679                   | TSC2     | Cluster0003 |
| 14998956 | XM_001492367 // TSEN2 // tRNA splicing endonuclease 2 homolog (S. cerevisiae) // --- //  | TSEN2    | Cluster0003 |
| 14938833 | ENSECAT00000025875 // TTBK2 // tau tubulin kinase 2 // --- // 100056539 /// XM_00150321  | TTBK2    | Cluster0003 |
| 14969531 | XM_001489510 // TTC17 // tetratricopeptide repeat domain 17 // --- // 100055237 /// ENS  | TTC17    | Cluster0003 |
| 14983727 | XM_001918332 // TTC37 // tetratricopeptide repeat domain 37 // --- // 100065001 /// ENS  | TTC37    | Cluster0003 |
| 14945546 | XM_001917950 // TUBGCP5 // tubulin, gamma complex associated protein 5 // --- // 100147  | TUBGCP5  | Cluster0003 |
| 15051007 | XM_001497726 // UAP1L1 // UDP-N-acetylglucosamine pyrophosphorylase 1-like 1 // --- //   | UAP1L1   | Cluster0003 |
| 14958453 | ENSECAT00000007493 // UBE2O // ubiquitin-conjugating enzyme E2O // --- // ---            | UBE2O    | Cluster0003 |
| 15045695 | ENSECAT00000005327 // UBR7 // ubiquitin protein ligase E3 component n-recognin 7 (putat  | UBR7     | Cluster0003 |
| 15113041 | XM_001504967 // UEVLD // UEV and lactate/malate dehydrogenase domains // --- // 10005714 | UEVLD    | Cluster0003 |
| 15008523 | XM_001504931 // UGGT1 // UDP-glucose glycoprotein glucosyltransferase 1 // --- // 10006  | UGGT1    | Cluster0003 |
| 15048396 | ENSECAT00000021730 // UNC13B // unc-13 homolog B (C. elegans) // --- // 100055666 /// E  | UNC13B   | Cluster0003 |
| 14943775 | XM_001496353 // URB2 // URB2 ribosome biogenesis 2 homolog (S. cerevisiae) // --- // 10  | URB2     | Cluster0003 |
| 14961566 | XM_001503781 // USP32 // ubiquitin specific peptidase 32 // --- // 100071369 /// ENSECA  | USP32    | Cluster0003 |
| 14989403 | ENSECAT00000024397 // USP34 // ubiquitin specific peptidase 34 // --- // 100064939 ///   | USP34    | Cluster0003 |
| 15099226 | XM_001495779 // USP40 // ubiquitin specific peptidase 40 // --- // 100065074 /// ENSECA  | USP40    | Cluster0003 |
| 15058444 | ENSECAT00000007600 // UTP20 // UTP20, small subunit (SSU) processome component, homolog  | UTP20    | Cluster0003 |
| 15101585 | NM_001163959 // VDR // vitamin D (1,25- dihydroxyvitamin D3) receptor // --- // 1000340  | VDR      | Cluster0003 |
| 15121915 | ENSECAT000000021375 // VPS13B // vacuolar protein sorting 13 homolog B (yeast) // --- // | VPS13B   | Cluster0003 |
| 15023955 | XM_001490932 // VPS13D // vacuolar protein sorting 13 homolog D (S. cerevisiae) // ---   | VPS13D   | Cluster0003 |
| 14947346 | XM_001503497 // VPS18 // vacuolar protein sorting 18 homolog (S. cerevisiae) // --- //   | VPS18    | Cluster0003 |
| 14944812 | ENSECAT00000027032 // VPS33B // vacuolar protein sorting 33 homolog B (yeast) // --- //  | VPS33B   | Cluster0003 |
| 15080649 | ENSECAT00000007739 // VPS41 // vacuolar protein sorting 41 homolog (S. cerevisiae) // -  | VPS41    | Cluster0003 |
| 14962240 | ENSECAT00000007354 // VPS53 // vacuolar protein sorting 53 homolog (S. cerevisiae) // -  | VPS53    | Cluster0003 |
| 15012113 | XM_001498641 // VPS8 // vacuolar protein sorting 8 homolog (S. cerevisiae) // --- // 10  | VPS8     | Cluster0003 |
| 14941297 | ENSECAT00000021574 // WDR11 // WD repeat domain 11 // --- // 100065386                   | WDR11    | Cluster0003 |
| 15091919 | XM_001500852 // WDR3 // WD repeat domain 3 // --- // 100059816 /// ENSECAT00000007455 /  | WDR3     | Cluster0003 |
| 15116587 | ENSECAT00000007500 // WDR7 // WD repeat domain 7 // --- // 100049995 /// ENSECAT00000001 | WDR7     | Cluster0003 |
| 15023079 | ENSECAT00000026317 // WDTC1 // WD and tetratricopeptide repeats 1 // --- // 100056964 /  | WDTC1    | Cluster0003 |
| 15099694 | ENSECAT00000025398 // WNK1 // WNK lysine deficient protein kinase 1 // --- // --- // E   | WNK1     | Cluster0003 |
| 15122997 | XM_001488288 // WWP1 // WW domain containing E3 ubiquitin protein ligase 1 // --- // 10  | WWP1     | Cluster0003 |
| 15065008 | JN712754 // WWP2 // WW domain containing E3 ubiquitin protein ligase 2 // --- // 100067  | WWP2     | Cluster0003 |
| 15004386 | ENSECAT00000020649 // XPO4 // exportin 4 // --- // 100054789 /// XM_001488990 // XPO4 /  | XPO4     | Cluster0003 |
| 15031721 | XM_001918236 // XPO5 // exportin 5 // --- // 100067497 /// ENSECAT00000003174 // XPO5 /  | XPO5     | Cluster0003 |
| 15019360 | XM_001490507 // XPO7 // exportin 7 // --- // 100056362 /// ENSECAT00000025425 // XPO7 /  | XPO7     | Cluster0003 |
| 15017212 | XM_001499806 // YARS // tyrosyl-tRNA synthetase // --- // 100070128 /// ENSECAT000000010 | YARS     | Cluster0003 |
| 15101203 | ENSECAT00000011549 // YARS2 // tyrosyl-tRNA synthetase 2, mitochondrial // --- // 10006  | YARS2    | Cluster0003 |
| 14986556 | XM_001918301 // YTHDC2 // YTH domain containing 2 // --- // 100064372 /// ENSECAT0000000 | YTHDC2   | Cluster0003 |
| 15084437 | ENSECAT00000014156 // ZBTB37 // zinc finger and BTB domain containing 37 // --- // 1000  | ZBTB37   | Cluster0003 |
| 15065763 | ENSECAT00000012512 // ZC3H18 // zinc finger CCCH-type containing 18 // --- // --- // E   | ZC3H18   | Cluster0003 |
| 15015924 | ENSECAT00000023091 // ZCCHC11 // zinc finger, CCHC domain containing 11 // --- // 10005  | ZCCHC11  | Cluster0003 |

|          |                                                                                          |          |             |
|----------|------------------------------------------------------------------------------------------|----------|-------------|
| 15124756 | ENSECAT00000026725 // ZFAT // zinc finger and AT hook domain containing // --- // 10006  | ZFAT     | Cluster0003 |
| 15047065 | ENSECAT00000019613 // ZFYVE26 // zinc finger, FYVE domain containing 26 // --- // 10006  | ZFYVE26  | Cluster0003 |
| 15002478 | ENSECAT00000004370 // ZMYM2 // zinc finger, MYM-type 2 // --- // --- // ENSECAT0000000   | ZMYM2    | Cluster0003 |
| 15022603 | ENSECAT00000009693 // ZMYM4 // zinc finger, MYM-type 4 // --- // 100069550               | ZMYM4    | Cluster0003 |
| 15116990 | ENSECAT00000006376 // ZNF236 // zinc finger protein 236 // --- // 100063239 /// XM_0014  | ZNF236   | Cluster0003 |
| 15130042 | ENSECAT00000003600 // ZNF449 // zinc finger protein 449 // --- // 100057349 /// XM_0014  | ZNF449   | Cluster0003 |
| 15029272 | ENSECAT00000010065 // ZNF451 // zinc finger protein 451 // --- // 100070011 /// XM_0014  | ZNF451   | Cluster0003 |
| 14942429 | NM_001257122 // ZNF518A // zinc finger protein 518A // --- // 100061148                  | ZNF518A  | Cluster0003 |
| 14992602 | ENSECAT00000028898 // ZNF638 // zinc finger protein 638 // --- // --- // ENSECAT000000   | ZNF638   | Cluster0003 |
| 15025716 | XM_001501949 // ABCE1 // ATP-binding cassette, sub-family E (OABP), member 1 // --- //   | ABCE1    | Cluster0004 |
| 15096954 | ENSECAT00000023621 // ACCN2 // acid-sensing (proton-gated) ion channel 1 // --- // 1000  | ACCN2    | Cluster0004 |
| 14948119 | XM_001494104 // ACIN1 // apoptotic chromatin condensation inducer 1 // --- // 100055865  | ACIN1    | Cluster0004 |
| 14960190 | XM_001495646 // ACLY // ATP citrate lyase // --- // 100053195 /// ENSECAT00000010787 //  | ACLY     | Cluster0004 |
| 15042343 | XM_001497806 // ACO1 // aconitase 1, soluble // --- // 100067866 /// ENSECAT00000016500  | ACO1     | Cluster0004 |
| 15006670 | NM_001242549 // ACVR2A // activin A receptor, type IIA // --- // 100049823               | ACVR2A   | Cluster0004 |
| 15097118 | ENSECAT00000009473 // ACVRL1 // activin A receptor type II-like 1 // --- // 100061313 /  | ACVRL1   | Cluster0004 |
| 14941778 | XM_001497076 // ADD3 // adducin 3 (gamma) // --- // 100059447 /// ENSECAT00000015130 //  | ADD3     | Cluster0004 |
| 15079077 | ENSECAT000000021871 // ADPGK // ADP-dependent glucokinase // --- // 100052166 /// XM_001 | ADPGK    | Cluster0004 |
| 15079234 | XM_001498120 // AGK // acylglycerol kinase // --- // 100064603 /// ENSECAT00000015203 /  | AGK      | Cluster0004 |
| 15034494 | ENSECAT00000016071 // AKAP8 // A kinase (PRKA) anchor protein 8 // --- // 100063189      | AKAP8    | Cluster0004 |
| 15072910 | XM_001491965 // AKT3 // v-akt murine thymoma viral oncogene homolog 3 (protein kinase B  | AKT3     | Cluster0004 |
| 15096516 | ENSECAT00000014031 // ALG10 // asparagine-linked glycosylation 10, alpha-1,2-glucosyltr  | ALG10    | Cluster0004 |
| 15072090 | XM_001497457 // ANAPC4 // anaphase promoting complex subunit 4 // --- // 100067388 ///   | ANAPC4   | Cluster0004 |
| 15088722 | XM_001499345 // ANKRD13C // ankyrin repeat domain 13C // --- // 100053662 /// ENSECAT00  | ANKRD13C | Cluster0004 |
| 15102655 | XM_001492032 // ANKRD52 // ankyrin repeat domain 52 // --- // 100059440 /// ENSECAT0000  | ANKRD52  | Cluster0004 |
| 14997153 | ENSECAT00000000574 // ANO10 // anoctamin 10 // --- // 100054874 /// XM_001501370 // ANO  | ANO10    | Cluster0004 |
| 14951237 | ENSECAT00000007814 // AP2A1 // adaptor-related protein complex 2, alpha 1 subunit // --  | AP2A1    | Cluster0004 |
| 15011940 | XM_001497146 // AP2M1 // adaptor-related protein complex 2, mu 1 subunit // --- // 1000  | AP2M1    | Cluster0004 |
| 15025584 | XM_003364540 // ARFIP1 // ADP-ribosylation factor interacting protein 1 // --- // 10062  | ARFIP1   | Cluster0004 |
| 15057715 | ENSECAT00000017030 // ARHGEF10 // Rho guanine nucleotide exchange factor (GEF) 10 // --  | ARHGEF10 | Cluster0004 |
| 15044413 | ENSECAT00000020848 // ARID4A // AT rich interactive domain 4A (RBP1-like) // --- // 100  | ARID4A   | Cluster0004 |
| 14977869 | XM_001494582 // ARPC1A // actin related protein 2/3 complex, subunit 1A, 41kDa // --- /  | ARPC1A   | Cluster0004 |
| 14968333 | XM_001502964 // ARRB2 // arrestin, beta 2 // --- // 100072892 /// ENSECAT00000020354 //  | ARRB2    | Cluster0004 |
| 15124610 | ENSECAT000000017553 // ASAP1 // ArfGAP with SH3 domain, ankyrin repeat and PH domain 1 / | ASAP1    | Cluster0004 |
| 15113773 | ENSECAT00000025242 // ASCC2 // activating signal cointegrator 1 complex subunit 2 // --  | ASCC2    | Cluster0004 |
| 15050324 | XM_001499340 // ASS1 // argininosuccinate synthase 1 // --- // 100069776 /// ENSECAT000  | ASS1     | Cluster0004 |
| 15111110 | XM_001491040 // ATG4D // autophagy related 4D, cysteine peptidase // --- // 100057841 /  | ATG4D    | Cluster0004 |
| 15034955 | XM_001500904 // ATP13A1 // ATPase type 13A1 // --- // 100071205 /// ENSECAT00000022204   | ATP13A1  | Cluster0004 |
| 15130509 | XM_003365908 // ATP6AP1 // ATPase, H+ transporting, lysosomal accessory protein 1 // --  | ATP6AP1  | Cluster0004 |
| 15078229 | ENSECAT00000020747 // AVL9 // AVL9 homolog (S. cerevisiae) // --- // 100070105 /// XM_   | AVL9     | Cluster0004 |
| 15002764 | XM_001495151 // B3GALTL // beta 1,3-galactosyltransferase-like // --- // 100064175 ///   | B3GALTL  | Cluster0004 |
| 15020858 | XM_001503097 // BBS7 // Bardet-Biedl syndrome 7 // --- // 100063923 /// ENSECAT000000025 | BBS7     | Cluster0004 |
| 14937788 | ENSECAT00000024286 // BNIP2 // BCL2/adenovirus E1B 19kDa interacting protein 2 // --- /  | BNIP2    | Cluster0004 |
| 15130603 | ENSECAT00000023027 // BRCC3 // BRCA1/BRCA2-containing complex, subunit 3 // --- // 1000  | BRCC3    | Cluster0004 |
| 15035852 | XM_001500161 // BRX1 // BRX1, biogenesis of ribosomes, homolog (S. cerevisiae) // ---    | BRX1     | Cluster0004 |
| 15047965 | ENSECAT00000013587 // BTBD7 // BTB (POZ) domain containing 7 // --- // 100053454         | BTBD7    | Cluster0004 |
| 15132639 | XM_001493218 // BTK // Bruton agammaglobulinemia tyrosine kinase // --- // 100057626 //  | BTK      | Cluster0004 |
| 14943564 | XM_001503918 // CAMK2G // calcium/calmodulin-dependent protein kinase II gamma // --- /  | CAMK2G   | Cluster0004 |
| 15033015 | ENSECAT00000011466 // CCDC125 // coiled-coil domain containing 125 // --- // 100055798   | CCDC125  | Cluster0004 |
| 15096438 | ENSECAT00000015713 // CCDC91 // coiled-coil domain containing 91 // --- // 100064764 //  | CCDC91   | Cluster0004 |
| 15098313 | XM_003365200 // CCT2 // chaperonin containing TCP1, subunit 2 (beta) // --- // 10005991  | CCT2     | Cluster0004 |
| 14992523 | XM_003362972 // CCT7 // chaperonin containing TCP1, subunit 7 (eta) // --- // 100050014  | CCT7     | Cluster0004 |
| 15048250 | XM_001491699 // CDC42BPB // CDC42 binding protein kinase beta (DMPK-like) // --- // 100  | CDC42BPB | Cluster0004 |
| 15035018 | XM_001491054 // CDK7 // cyclin-dependent kinase 7 // --- // 100049964 /// ENSECAT000000  | CDK7     | Cluster0004 |

|          |                                                                                                   |         |             |
|----------|---------------------------------------------------------------------------------------------------|---------|-------------|
| 14972465 | XM_003362602 // CELF1 // CUGBP, Elav-like family member 1 // --- // 100051608 /// ENSEC           | CELF1   | Cluster0004 |
| 14936281 | XM_001488013 // CHD2 // chromodomain helicase DNA binding protein 2 // --- // 100049803           | CHD2    | Cluster0004 |
| 15119156 | XM_001493348 // CHFR // checkpoint with forkhead and ring finger domains, E3 ubiquitin            | CHFR    | Cluster0004 |
| 15001371 | XM_001491223 // CNOT10 // CCR4-NOT transcription complex, subunit 10 // --- // 10005081           | CNOT10  | Cluster0004 |
| 15065293 | XM_001500840 // COG4 // component of oligomeric golgi complex 4 // --- // 100054801 ///           | COG4    | Cluster0004 |
| 15003062 | ENSECAT00000011756 // COG6 // component of oligomeric golgi complex 6 // --- // 1000508           | COG6    | Cluster0004 |
| 14974019 | XM_001917529 // CORO1B // coronin, actin binding protein, 1B // --- // 100053095 /// EN           | CORO1B  | Cluster0004 |
| 14974947 | ENSECAT00000016488 // COX19 // COX19 cytochrome c oxidase assembly homolog (S. cerevisi           | COX19   | Cluster0004 |
| 14984636 | XM_001502804 // CPEB4 // cytoplasmic polyadenylation element binding protein 4 // --- /           | CPEB4   | Cluster0004 |
| 15008423 | JQ044378 // CREB1 // cAMP responsive element binding protein 1 // --- // 100066388                | CREB1   | Cluster0004 |
| 15068447 | ENSECAT00000016987 // CTBP1 // C-terminal binding protein 1 // --- // 100052216 /// XM_           | CTBP1   | Cluster0004 |
| 15004218 | ENSECAT00000020697 // CUL4A // cullin 4A // --- // 100033930 /// ENSECAT00000020701 //            | CUL4A   | Cluster0004 |
| 15133114 | ENSECAT00000025736 // CUL4B // cullin 4B // --- // 100033938                                      | CUL4B   | Cluster0004 |
| 15010507 | ENSECAT00000011599 // CWC22 // CWC22 spliceosome-associated protein homolog (S. cerevis           | CWC22   | Cluster0004 |
| 15042730 | XM_003363984 // DAPK1 // death-associated protein kinase 1 // --- // 100061567 /// ENSE           | DAPK1   | Cluster0004 |
| 15077284 | XM_001489324 // DBF4 // DBF4 homolog (S. cerevisiae) // --- // 100050313 /// ENSECAT000           | DBF4    | Cluster0004 |
| 15038161 | ENSECAT000000000414 // DBNDD2 // dysbindin (dystrobrevin binding protein 1) domain conta          | DBNDD2  | Cluster0004 |
| 15043978 | XM_001499560 // DCAF12 // DCAF12 // DDB1 and CUL4 associated factor 12 // --- // 100068462 /// EN | DCAF12  | Cluster0004 |
| 15069612 | XM_001500964 // DDX19B // DEAD (Asp-Glu-Ala-Asp) box polypeptide 19B // --- // 10005493           | DDX19B  | Cluster0004 |
| 15101716 | XM_001504119 // DDX23 // DEAD (Asp-Glu-Ala-Asp) box polypeptide 23 // --- // 100051439            | DDX23   | Cluster0004 |
| 15038404 | XM_001501119 // DDX27 // DEAD (Asp-Glu-Ala-Asp) box polypeptide 27 // --- // 100071375            | DDX27   | Cluster0004 |
| 15053039 | XM_001499227 // DDX31 // DEAD (Asp-Glu-Ala-Asp) box polypeptide 31 // --- // 100069463            | DDX31   | Cluster0004 |
| 15074578 | ENSECAT00000021935 // DENND1B // DENN/MADD domain containing 1B // --- // 100061134               | DENND1B | Cluster0004 |
| 15042177 | ENSECAT00000000697 // DENND4C // DENN/MADD domain containing 4C // --- // 100052312               | DENND4C | Cluster0004 |
| 15023161 | ENSECAT00000017264 // DHDDS // dehydrololichyl diphosphate synthase // --- // 100057242           | DHDDS   | Cluster0004 |
| 14965485 | ENSECAT00000021248 // DHX8 // DEAH (Asp-Glu-Ala-His) box polypeptide 8 // --- // 100051           | DHX8    | Cluster0004 |
| 15130576 | ENSECAT00000025423 // DKC1 // dyskeratosis congenita 1, dyskerin // --- // 100062345 ///          | DKC1    | Cluster0004 |
| 15104450 | ENSECAT00000023060 // DLAT // dihydrolipoamide S-acetyltransferase // --- // 100062027            | DLAT    | Cluster0004 |
| 15007619 | ENSECAT00000010535 // DNAJC10 // DnaJ (Hsp40) homolog, subfamily C, member 10 // --- //           | DNAJC10 | Cluster0004 |
| 15121516 | NM_001163858 // DNAPK // DNAPK // DNA-dependent protein kinase catalytic subunit // --- // 79123  | DNAPK   | Cluster0004 |
| 15105837 | ENSECAT00000020211 // DNASE2 // deoxyribonuclease II, lysosomal // --- // ---                     | DNASE2  | Cluster0004 |
| 15088902 | ENSECAT00000009395 // DOCK7 // dedicator of cytokinesis 7 // --- // 100070382 /// XM_00           | DOCK7   | Cluster0004 |
| 15111593 | ENSECAT00000017377 // EED // embryonic ectoderm development // --- // ---                         | EED     | Cluster0004 |
| 15004441 | XM_001489625 // EFHA1 // EF-hand domain family, member A1 // --- // 100055452 /// ENSEC           | EFHA1   | Cluster0004 |
| 14959697 | XM_003362540 // EFTUD2 // elongation factor Tu GTP binding domain containing 2 // --- /           | EFTUD2  | Cluster0004 |
| 15012029 | NM_001163871 // EIF4G1 // eukaryotic translation initiation factor 4 gamma, 1 // --- //           | EIF4G1  | Cluster0004 |
| 14991615 | ENSECAT00000024261 // EIF5B // eukaryotic translation initiation factor 5B // --- // 10           | EIF5B   | Cluster0004 |
| 15020704 | ENSECAT00000023598 // ELF2 // E74-like factor 2 (ets domain transcription factor) // --           | ELF2    | Cluster0004 |
| 15116254 | XM_001916080 // ELP2 // elongation protein 2 homolog (S. cerevisiae) // --- // 10005293           | ELP2    | Cluster0004 |
| 15024860 | XM_001492944 // ENTPD4 // ectonucleoside triphosphate diphosphohydrolase 4 // --- // 10           | ENTPD4  | Cluster0004 |
| 15006699 | ENSECAT00000011273 // EPC2 // enhancer of polycomb homolog 2 (Drosophila) // --- // 100           | EPC2    | Cluster0004 |
| 14959323 | XM_001495274 // ERN1 // endoplasmic reticulum to nucleus signaling 1 // --- // 10006433           | ERN1    | Cluster0004 |
| 15046637 | ENSECAT00000014461 // ERO1L // ERO1-like (S. cerevisiae) // --- // ---                            | ERO1L   | Cluster0004 |
| 15115769 | XM_001491258 // ESCO1 // establishment of cohesion 1 homolog 1 (S. cerevisiae) // --- /           | ESCO1   | Cluster0004 |
| 14942619 | XM_001502528 // EXOC6 // exocyst complex component 6 // --- // 100061840 /// ENSECAT000           | EXOC6   | Cluster0004 |
| 14989084 | ENSECAT00000020799 // EXOC6B // exocyst complex component 6B // --- // 100059535 /// XM           | EXOC6B  | Cluster0004 |
| 14959999 | ENSECAT00000009661 // EZH1 // enhancer of zeste homolog 1 (Drosophila) // --- // 100052           | EZH1    | Cluster0004 |
| 14983519 | XM_001918313 // FBXL17 // F-box and leucine-rich repeat protein 17 // --- // 100146140            | FBXL17  | Cluster0004 |
| 15068036 | ENSECAT00000026208 // FBXL5 // F-box and leucine-rich repeat protein 5 // --- // 100055           | FBXL5   | Cluster0004 |
| 15018401 | XM_001488662 // FBXO42 // F-box protein 42 // --- // 100053402 /// ENSECAT00000019734 /           | FBXO42  | Cluster0004 |
| 15017509 | XM_001504019 // FGR // Gardner-Rasheed feline sarcoma viral (v-fgr) oncogene homolog //           | FGR     | Cluster0004 |
| 14967415 | ENSECAT00000012832 // FLOT2 // flotillin 2 // --- // 100072090 /// XM_001501952 // FLOT           | FLOT2   | Cluster0004 |
| 14965457 | ENSECAT00000026227 // G6PC3 // glucose 6 phosphatase, catalytic, 3 // --- // 100064862            | G6PC3   | Cluster0004 |
| 15133967 | XM_001492232 // G6PD // glucose-6-phosphate dehydrogenase // --- // 100059734 /// ENSEC           | G6PD    | Cluster0004 |



|          |                                                                                         |              |             |
|----------|-----------------------------------------------------------------------------------------|--------------|-------------|
| 15007881 | ENSECAT00000011641 // GLS // glutaminase // --- // 100069617 /// XM_001499354 // GLS // | GLS          | Cluster0004 |
| 15032705 | XM_001499899 // GLT25D1 // glycosyltransferase 25 domain containing 1 // --- // 1000702 | GLT25D1      | Cluster0004 |
| 14977069 | XM_001499634 // GLYR1 // glyoxylate reductase 1 homolog (Arabidopsis) // --- // 1000699 | GLYR1        | Cluster0004 |
| 15016871 | XM_001503591 // GNL2 // guanine nucleotide binding protein-like 2 (nucleolar) // --- // | GNL2         | Cluster0004 |
| 15060512 | ENSECAT00000011449 // GNPTAB // N-acetylglucosamine-1-phosphate transferase, alpha and  | GNPTAB       | Cluster0004 |
| 15012858 | ENSECAT00000009916 // GOLGB1 // golgin B1 // --- // 100070765 /// XM_001916854 // GOLGB | GOLGB1       | Cluster0004 |
| 14933535 | XM_001501044 // GOT1 // glutamic-oxaloacetic transaminase 1, soluble (aspartate aminotr | GOT1         | Cluster0004 |
| 14944084 | XM_001916496 // GPR137B // G protein-coupled receptor 137B // --- // 100050643 /// ENSE | GPR137B      | Cluster0004 |
| 14976850 | XM_001489900 // GSPT1 // G1 to S phase transition 1 // --- // 100055960 /// XM_00336273 | GSPT1        | Cluster0004 |
| 14987651 | XM_001504043 // GTF2H2 // general transcription factor IIH, polypeptide 2, 44kDa // --- | GTF2H2       | Cluster0004 |
| 15059103 | ENSECAT00000019388 // GTPBP1 // GTP binding protein 1 // --- // 100147081 /// XM_001916 | GTPBP1       | Cluster0004 |
| 14956830 | XM_001501736 // HACE1 // HECT domain and ankyrin repeat containing E3 ubiquitin protein | HACE1        | Cluster0004 |
| 14990571 | XM_001502783 // HADHA // hydroxyacyl-CoA dehydrogenase/3-ketoacyl-CoA thiolase/enoyl-Co | HADHA        | Cluster0004 |
| 14966849 | ENSECAT00000020639 // HEATR6 // HEAT repeat containing 6 // --- // 100071508 /// XM_001 | HEATR6       | Cluster0004 |
| 14972074 | XM_003362582 // HIPK3 // homeodomain interacting protein kinase 3 // --- // 100059137 / | HIPK3        | Cluster0004 |
| 14984691 | NM_001081835 // HMGB1 // high mobility group box 1 // --- // 100033873 /// AB275457 //  | HMGB1        | Cluster0004 |
| 15129125 | XM_001493778 // HNRNPH2 // heterogeneous nuclear ribonucleoprotein H2 (H ) // --- // 10 | HNRNPH2      | Cluster0004 |
| 14953947 | ENSECAT00000013350 // HNRNPL // heterogeneous nuclear ribonucleoprotein L // --- // 100 | HNRNPL       | Cluster0004 |
| 15093058 | ENSECAT00000001370 // HS2ST1 // heparan sulfate 2-O-sulfotransferase 1 // --- // 100063 | HS2ST1       | Cluster0004 |
| 15004676 | XM_001493517 // HSPH1 // heat shock 105kDa/110kDa protein 1 // --- // 100062150 /// ENS | HSPH1        | Cluster0004 |
| 15056786 | ENSECAT00000005219 // IKBKB // inhibitor of kappa light polypeptide gene enhancer in B- | IKBKB        | Cluster0004 |
| 15033233 | ENSECAT00000021352 // IL6ST // interleukin 6 signal transducer (gp130, oncostatin M rec | IL6ST        | Cluster0004 |
| 14988650 | ENSECAT00000026571 // IMMT // inner membrane protein, mitochondrial // --- // 100067027 | IMMT         | Cluster0004 |
| 15003160 | ENSECAT00000014628 // INTS6 // integrator complex subunit 6 // --- // 100053346 /// XM_ | INTS6        | Cluster0004 |
| 15085258 | XM_003364961 // INTS7 // integrator complex subunit 7 // --- // 100051001 /// XM_001489 | INTS7        | Cluster0004 |
| 15121776 | ENSECAT00000022027 // INTS8 // integrator complex subunit 8 // --- // 100055266         | INTS8        | Cluster0004 |
| 15096670 | XM_001488439 // IRAK4 // interleukin-1 receptor-associated kinase 4 // --- // 100054848 | IRAK4        | Cluster0004 |
| 14943098 | ENSECAT00000013768 // JMJD1C // jumonji domain containing 1C // --- // ---              | JMJD1C       | Cluster0004 |
| 15023419 | ENSECAT00000021147 // KDM1A // lysine (K)-specific demethylase 1A // --- // 100071646   | KDM1A        | Cluster0004 |
| 15022822 | ENSECAT00000020673 // KHDRBS1 // KH domain containing, RNA binding, signal transduction | KHDRBS1      | Cluster0004 |
| 14967348 | ENSECAT00000019247 // KIAA0100 // KIAA0100 // --- // --- /// ENSECAT00000019280 // KIAA | KIAA0100     | Cluster0004 |
| 15035258 | XM_001493976 // KIF2A // kinesin heavy chain member 2A // --- // 100050982 /// ENSECAT0 | KIF2A        | Cluster0004 |
| 15062601 | XM_001916725 // KIN // KIN, antigenic determinant of recA protein homolog (mouse) // -- | KIN          | Cluster0004 |
| 15046411 | ENSECAT00000016217 // KLC1 // kinesin light chain 1 // --- // 100055290 /// XM_00149135 | KLC1         | Cluster0004 |
| 15003616 | XM_001495367 // KLF5 // Kruppel-like factor 5 (intestinal) // --- // 100052058 /// ENSE | KLF5         | Cluster0004 |
| 15078860 | XM_001502956 // KLHDC10 // kelch domain containing 10 // --- // 100057051 /// ENSECAT00 | KLHDC10      | Cluster0004 |
| 15025290 | ENSECAT00000011464 // KLHL2 // kelch-like 2, Mayven (Drosophila) // --- // 100068150 // | KLHL2        | Cluster0004 |
| 15043751 | NM_001257143 // KLHL9 // kelch-like 9 (Drosophila) // --- // 100064784 /// ENSECAT00000 | KLHL9        | Cluster0004 |
| 15081362 | ENSECAT00000018262 // KRIT1 // KRIT1, ankyrin repeat containing // --- // 100050998 /// | KRIT1        | Cluster0004 |
| 15000681 | ENSECAT00000025995 // LIMD1 // LIM domains containing 1 // --- // ---                   | LIMD1        | Cluster0004 |
| 15091054 | XM_001499888 // LMNA // lamin A/C // --- // 100057663 /// ENSECAT00000011877 // LMNA // | LMNA         | Cluster0004 |
| 15070075 | XM_001488006 // LOC100049843 // cytochrome b-245 light chain-like // --- // 100049843 / | LOC100049843 | Cluster0004 |
| 15063833 | XM_001487932 // LOC100049912 // ras-related protein Rap-1A-like // --- // 100049912 /// | LOC100049912 | Cluster0004 |
| 15049327 | XM_001487977 // LOC100049971 // transmembrane protein C9orf91-like // --- // 100049971  | LOC100049971 | Cluster0004 |
| 15101338 | XM_001914700 // LOC100049989 // zinc finger CCHC-type and RNA-binding motif-containing  | LOC100049989 | Cluster0004 |
| 14976601 | ENSECAT00000010646 // LOC100050012 // glycerophosphodiester phosphodiesterase 1-like // | LOC100050012 | Cluster0004 |
| 15045865 | XM_001488249 // LOC100050033 // serine/threonine-protein kinase VRK1-like // --- // 100 | LOC100050033 | Cluster0004 |
| 15120406 | XM_001488219 // LOC100050058 // asparaginyl-tRNA synthetase, cytoplasmic-like // --- // | LOC100050058 | Cluster0004 |
| 15106580 | XM_001488653 // LOC100050120 // cysteine and histidine-rich domain-containing protein 1 | LOC100050120 | Cluster0004 |
| 14994788 | XM_003363052 // LOC100050146 // cellular nucleic acid-binding protein-like // --- // 10 | LOC100050146 | Cluster0004 |
| 15085619 | XM_001487994 // LOC100050332 // dual specificity protein phosphatase 12-like // --- //  | LOC100050332 | Cluster0004 |
| 15125464 | ENSECAT00000008830 // LOC100050718 // uncharacterized protein C22orf25 homolog // --- / | LOC100050718 | Cluster0004 |
| 15089172 | XM_001490878 // LOC100050772 // ras-related protein Rab-7b-like // --- // 100050772 /// | LOC100050772 | Cluster0004 |
| 14944107 | XM_001492832 // LOC100050954 // geranylgeranyl pyrophosphate synthase-like // --- // 10 | LOC100050954 | Cluster0004 |

|          |                                                                                          |              |             |
|----------|------------------------------------------------------------------------------------------|--------------|-------------|
| 15008961 | XM_001490165 // LOC100050974 // c-X-C chemokine receptor type 4-like // --- // 10005097  | LOC100050974 | Cluster0004 |
| 14948784 | ENSECAT00000012263 // LOC100051031 // trafficking protein particle complex subunit 6B-1  | LOC100051031 | Cluster0004 |
| 15127079 | XM_001490349 // LOC100051095 // carbonic anhydrase 5B, mitochondrial-like // --- // 100  | LOC100051095 | Cluster0004 |
| 14970893 | ENSECAT00000024544 // LOC100051106 // calpain-1 catalytic subunit-like // --- // 100051  | LOC100051106 | Cluster0004 |
| 15084804 | XM_001488444 // LOC100051159 // xenotropic and polytropic retrovirus receptor 1-like //  | LOC100051159 | Cluster0004 |
| 15072698 | XM_001489181 // LOC100051309 // e3 ubiquitin ligase RNF4-like // --- // 100051309 // E   | LOC100051309 | Cluster0004 |
| 14988191 | XM_001492041 // LOC100051330 // VIP36-like protein-like // --- // 100051330 // ENSECAT   | LOC100051330 | Cluster0004 |
| 15068851 | XM_001915110 // LOC100051355 // cleavage and polyadenylation specificity factor subunit  | LOC100051355 | Cluster0004 |
| 15121733 | ENSECAT00000017156 // LOC100051376 // Pyruvate dehydrogenase [acetyl-transferring]-phos  | LOC100051376 | Cluster0004 |
| 14936929 | ENSECAT00000000149 // LOC100051391 // cytochrome c oxidase subunit 5A, mitochondrial-li  | LOC100051391 | Cluster0004 |
| 15041910 | XM_001917198 // LOC100051417 // hsp90 co-chaperone Cdc37-like 1-like // --- // 10005141  | LOC100051417 | Cluster0004 |
| 15095534 | XM_001494601 // LOC100051504 // NADH dehydrogenase [ubiquinone] 1 alpha subcomplex subu  | LOC100051504 | Cluster0004 |
| 14958623 | XM_001494673 // LOC100051538 // 39S ribosomal protein L38, mitochondrial-like // --- //  | LOC100051538 | Cluster0004 |
| 15003503 | ENSECAT000000013728 // LOC100051549 // suppressor of G2 allele of SKP1 homolog // --- // | LOC100051549 | Cluster0004 |
| 15018702 | XM_001493871 // LOC100051553 // protein LZIC-like // --- // 100051553 // ENSECAT000000   | LOC100051553 | Cluster0004 |
| 15076912 | XM_001495620 // LOC100051642 // drebrin-like protein-like // --- // 100051642 // XM_00   | LOC100051642 | Cluster0004 |
| 14945930 | ENSECAT00000004496 // LOC100052046 // CD276 antigen-like // --- // 100052046 // XM_001   | LOC100052046 | Cluster0004 |
| 15024339 | XM_001495398 // LOC100052123 // protein DJ-1-like // --- // 100052123 // ENSECAT000000   | LOC100052123 | Cluster0004 |
| 15064289 | ENSECAT00000014565 // LOC100052133 // RING finger and SPRY domain-containing protein 1-  | LOC100052133 | Cluster0004 |
| 15089466 | XM_001496519 // LOC100052201 // vesicle-associated membrane protein 4-like // --- // 10  | LOC100052201 | Cluster0004 |
| 15116149 | XM_001495353 // LOC100052335 // e3 ubiquitin-protein ligase RNF125-like // --- // 10005  | LOC100052335 | Cluster0004 |
| 15102692 | XM_001504833 // LOC100052340 // protein canopy homolog 2-like // --- // 100052340 // E   | LOC100052340 | Cluster0004 |
| 14959996 | XM_001493268 // LOC100052353 // coiled-coil domain-containing protein 56-like // --- //  | LOC100052353 | Cluster0004 |
| 15055179 | XM_001497986 // LOC100052430 // transmembrane protein 50B-like // --- // 100052430 //    | LOC100052430 | Cluster0004 |
| 15031016 | XM_001496005 // LOC100052481 // proteasome subunit beta type-8-like // --- // 100052481  | LOC100052481 | Cluster0004 |
| 15068436 | XM_001917814 // LOC100052572 // transmembrane protein 129-like // --- // 100052572 //    | LOC100052572 | Cluster0004 |
| 15065932 | ENSECAT000000020496 // LOC100052665 // transcription factor 25-like // --- // 100052665  | LOC100052665 | Cluster0004 |
| 15003673 | ENSECAT00000010662 // LOC100052699 // ceroid-lipofuscinosis neuronal protein 5-like //   | LOC100052699 | Cluster0004 |
| 15066347 | ENSECAT00000008370 // LOC100052823 // estradiol 17-beta-dehydrogenase 11-like // --- //  | LOC100052823 | Cluster0004 |
| 15027108 | ENSECAT000000026293 // LOC100052917 // tripartite motif-containing protein 38-like // -- | LOC100052917 | Cluster0004 |
| 15121653 | XM_001488342 // LOC100052944 // OTU domain-containing protein 6B-like // --- // 1000529  | LOC100052944 | Cluster0004 |
| 14951676 | XM_001488024 // LOC100052952 // 40S ribosomal protein S9-like // --- // 100052952 // E   | LOC100052952 | Cluster0004 |
| 15047051 | XM_001499937 // LOC100052972 // vesicle transport through interaction with t-SNAREs hom  | LOC100052972 | Cluster0004 |
| 15060549 | ENSECAT000000013639 // LOC100053117 // WASH complex subunit CCDC53-like // --- // 100053 | LOC100053117 | Cluster0004 |
| 15064594 | XM_001915760 // LOC100053119 // transcription factor E2F4-like // --- // 100053119 //    | LOC100053119 | Cluster0004 |
| 14946286 | XM_001497817 // LOC100053192 // 3-hydroxyacyl-CoA dehydratase 3-like // --- // 10005319  | LOC100053192 | Cluster0004 |
| 15041503 | XM_001488638 // LOC100053331 // uncharacterized LOC100053331 // --- // 100053331 // EN   | LOC100053331 | Cluster0004 |
| 15045693 | XM_001497576 // LOC100053356 // UPF0694 transmembrane protein C14orf109 homolog // ---   | LOC100053356 | Cluster0004 |
| 15093394 | XM_001498949 // LOC100053370 // tRNA wybutosine-synthesizing protein 3 homolog // --- // | LOC100053370 | Cluster0004 |
| 14995401 | XM_003363051 // LOC100053493 // uncharacterized glycosyltransferase AER61-like // --- // | LOC100053493 | Cluster0004 |
| 15097922 | ENSECAT000000014187 // LOC100053518 // phosphatidylinositol-5-phosphate 4-kinase type-2  | LOC100053518 | Cluster0004 |
| 14936098 | XM_001502860 // LOC100053632 // calcium and integrin-binding protein 1-like // --- // 1  | LOC100053632 | Cluster0004 |
| 15069353 | XM_001498448 // LOC100053706 // solute carrier family 12 member 4-like // --- // 100053  | LOC100053706 | Cluster0004 |
| 15071375 | ENSECAT000000014599 // LOC100053708 // DNA-directed RNA polymerase II subunit RPB2-like  | LOC100053708 | Cluster0004 |
| 14996695 | XM_001498943 // LOC100053786 // cytochrome b-c1 complex subunit I, mitochondrial-like /  | LOC100053786 | Cluster0004 |
| 15053797 | XM_001499592 // LOC100053798 // ubiquitin carboxyl-terminal hydrolase 16-like // --- //  | LOC100053798 | Cluster0004 |
| 15070337 | ENSECAT000000018313 // LOC100053857 // dual adapter for phosphotyrosine and 3-phosphoty  | LOC100053857 | Cluster0004 |
| 15060740 | XM_001499461 // LOC100054153 // tRNA-splicing ligase RtcB homolog // --- // 100054153 /  | LOC100054153 | Cluster0004 |
| 15132894 | XM_001489664 // LOC100054363 // AMME syndrome candidate gene 1 protein homolog // --- /  | LOC100054363 | Cluster0004 |
| 15039933 | ENSECAT000000022181 // LOC100054381 // adenosylhomocysteinase-like // --- // 100054381 / | LOC100054381 | Cluster0004 |
| 15129450 | XM_001489834 // LOC100054407 // transmembrane protein 164-like // --- // 100054407 //    | LOC100054407 | Cluster0004 |
| 15004969 | ENSECAT000000015107 // LOC100054469 // ribonuclease H2 subunit B-like // --- // 10005446 | LOC100054469 | Cluster0004 |
| 14993723 | ENSECAT000000010851 // LOC100054514 // spastin-like // --- // 100054514                  | LOC100054514 | Cluster0004 |
| 15060852 | XM_001500445 // LOC100054528 // eukaryotic translation initiation factor 3 subunit D-li  | LOC100054528 | Cluster0004 |

|          |                                                                                          |              |             |
|----------|------------------------------------------------------------------------------------------|--------------|-------------|
| 15038508 | XM_001914822 // LOC100054563 // transmembrane protein C20orf108-like // --- // 10005456  | LOC100054563 | Cluster0004 |
| 15132804 | ENSECAT00000022230 // LOC100054590 // 26S proteasome non-ATPase regulatory subunit 10-1  | LOC100054590 | Cluster0004 |
| 14997121 | XM_001500901 // LOC100054643 // palmitoyltransferase ZDHHC3-like // --- // 100054643 //  | LOC100054643 | Cluster0004 |
| 15086945 | ENSECAT00000018166 // LOC100054812 // alpha-endosulfine-like // --- // 100054812 // XM   | LOC100054812 | Cluster0004 |
| 15000787 | ENSECAT00000020565 // LOC100054832 // uncharacterized protein C3orf23-like // --- // 10  | LOC100054832 | Cluster0004 |
| 15110988 | ENSECAT00000010256 // LOC100054949 // transcription activator BRG1-like // --- // 10005  | LOC100054949 | Cluster0004 |
| 15121392 | ENSECAT00000014189 // LOC100055036 // transcription elongation factor A protein 1-like   | LOC100055036 | Cluster0004 |
| 14993934 | XM_001502144 // LOC100055055 // GPN-loop GTPase 1-like // --- // 100055055 // ENSECAT0   | LOC100055055 | Cluster0004 |
| 15086865 | ENSECAT00000009525 // LOC100055075 // protein FAM63A-like // --- // 100055075 // XM_00   | LOC100055075 | Cluster0004 |
| 14970674 | XM_001916705 // LOC100055100 // stress-induced-phosphoprotein 1-like // --- // 10005510  | LOC100055100 | Cluster0004 |
| 15123833 | XM_001489304 // LOC100055169 // protein virilizer homolog // --- // 100055169 // ENSEC   | LOC100055169 | Cluster0004 |
| 14990415 | XM_001502269 // LOC100055191 // protein phosphatase 1G-like // --- // 100055191 // ENS   | LOC100055191 | Cluster0004 |
| 15065376 | XM_001501541 // LOC100055295 // gamma-aminobutyric acid receptor-associated protein-lik  | LOC100055295 | Cluster0004 |
| 15004430 | ENSECAT00000017277 // LOC100055368 // probable palmitoyltransferase ZDHHC20-like // ---  | LOC100055368 | Cluster0004 |
| 15075859 | ENSECAT00000017712 // LOC100055381 // ribonuclease T2-like // --- // 100055381 // XM_0   | LOC100055381 | Cluster0004 |
| 15082247 | XM_001501128 // LOC100055464 // homocysteine-responsive endoplasmic reticulum-resident   | LOC100055464 | Cluster0004 |
| 15121838 | XM_001490623 // LOC100055515 // plasma glutamate carboxypeptidase-like // --- // 100055  | LOC100055515 | Cluster0004 |
| 15008929 | XM_001489698 // LOC100055572 // DNA replication licensing factor MCM6-like // --- // 10  | LOC100055572 | Cluster0004 |
| 15028988 | XM_001502478 // LOC100055574 // cell division cycle 5-like protein-like // --- // 10005  | LOC100055574 | Cluster0004 |
| 14994866 | XM_001489793 // LOC100055748 // transmembrane protein 43-like // --- // 100055748 // E   | LOC100055748 | Cluster0004 |
| 15089727 | XM_001489794 // LOC100055750 // retinoic acid receptor responder protein 1-like // ---   | LOC100055750 | Cluster0004 |
| 15073420 | XM_001489827 // LOC100055808 // membrane magnesium transporter 1-like // --- // 1000558  | LOC100055808 | Cluster0004 |
| 14966168 | XM_001502240 // LOC100055830 // vacuolar-sorting protein SNF8-like // --- // 100055830   | LOC100055830 | Cluster0004 |
| 15092647 | XM_001918140 // LOC100055854 // RNA 3'-terminal phosphate cyclase-like // --- // 100055  | LOC100055854 | Cluster0004 |
| 14994890 | ENSECAT00000000611 // LOC100055882 // uncharacterized protein C3orf19-like // --- // 10  | LOC100055882 | Cluster0004 |
| 15055616 | ENSECAT00000005806 // LOC100055890 // GDP-fucose protein O-fucosyltransferase 2-like //  | LOC100055890 | Cluster0004 |
| 14957883 | ENSECAT00000017181 // LOC100056149 // uncharacterized protein C17orf62 homolog // --- /  | LOC100056149 | Cluster0004 |
| 14971861 | XM_001494530 // LOC100056151 // CD151 antigen-like // --- // 100056151 // ENSECAT00000   | LOC100056151 | Cluster0004 |
| 15072344 | ENSECAT00000016981 // LOC100056340 // syntaxin-18-like // --- // 100056340 // XM_00191   | LOC100056340 | Cluster0004 |
| 15127104 | ENSECAT00000007238 // LOC100056673 // synapse-associated protein 1-like // --- // 10005  | LOC100056673 | Cluster0004 |
| 14995006 | XM_001492042 // LOC100056766 // 60S ribosomal protein L32-like // --- // 100056766 //    | LOC100056766 | Cluster0004 |
| 15089287 | XM_001915543 // LOC100056817 // protein CREG1-like // --- // 100056817 // ENSECAT00000   | LOC100056817 | Cluster0004 |
| 15094398 | XM_001496411 // LOC100056818 // rhomboid domain-containing protein 1-like // --- // 100  | LOC100056818 | Cluster0004 |
| 15122253 | XM_001496257 // LOC100056859 // rRNA-processing protein UTP23 homolog // --- // 1000568  | LOC100056859 | Cluster0004 |
| 15061854 | XM_001490463 // LOC100056911 // arylsulfatase A-like // --- // 100056911 // ENSECAT000   | LOC100056911 | Cluster0004 |
| 15118490 | XM_001493775 // LOC100057258 // endoplasmic reticulum resident protein 29-like // --- /  | LOC100057258 | Cluster0004 |
| 14939241 | XM_001503583 // LOC100057403 // signal recognition particle 14 kDa protein-like // ---   | LOC100057403 | Cluster0004 |
| 15094978 | XM_001500288 // LOC100057575 // NEDD8-conjugating enzyme UBE2F-like // --- // 100057575  | LOC100057575 | Cluster0004 |
| 15062832 | ENSECAT00000025866 // LOC100057616 // la-related protein 4B-like // --- // 100057616 //  | LOC100057616 | Cluster0004 |
| 15118512 | XM_001490910 // LOC100057622 // aldehyde dehydrogenase, mitochondrial-like // --- // 10  | LOC100057622 | Cluster0004 |
| 15115630 | ENSECAT00000000828 // LOC100057795 // tyrosine-protein phosphatase non-receptor type 2-  | LOC100057795 | Cluster0004 |
| 15066795 | XM_001916447 // LOC100057831 // n-acyl ethanolamine-hydrolyzing acid amidase-like // --- | LOC100057831 | Cluster0004 |
| 14940520 | ENSECAT00000020459 // LOC100057857 // mitochondrial ribonuclease P protein 3-like // --  | LOC100057857 | Cluster0004 |
| 15118546 | ENSECAT00000007051 // LOC100057885 // SH2B adapter protein 3-like // --- // 100057885 /  | LOC100057885 | Cluster0004 |
| 14995078 | XM_001493599 // LOC100057913 // protein SEC13 homolog // --- // 100057913 // XM_003363   | LOC100057913 | Cluster0004 |
| 15038735 | ENSECAT00000022008 // LOC100057922 // GTP-binding protein 5-like // --- // 100057922     | LOC100057922 | Cluster0004 |
| 14947653 | ENSECAT00000025209 // LOC100057956 // uncharacterized protein C15orf29-like // --- // 1  | LOC100057956 | Cluster0004 |
| 14984401 | ENSECAT00000000710 // LOC100058137 // protein RMD5 homolog B-like // --- // 100058137 /  | LOC100058137 | Cluster0004 |
| 15051929 | ENSECAT00000022837 // LOC100058146 // proteasome-associated protein ECM29 homolog // --  | LOC100058146 | Cluster0004 |
| 15057113 | ENSECAT00000017536 // LOC100058148 // protein MAK16 homolog // --- // 100058148 // XM_   | LOC100058148 | Cluster0004 |
| 15057858 | XM_001914713 // LOC100058283 // glioma pathogenesis-related protein 1-like // --- // 10  | LOC100058283 | Cluster0004 |
| 15056135 | ENSECAT00000019124 // LOC100058323 // general transcription factor IIE subunit 2-like /  | LOC100058323 | Cluster0004 |
| 15114744 | ENSECAT00000005674 // LOC100058336 // actin-related protein 2/3 complex subunit 3-like   | LOC100058336 | Cluster0004 |
| 15114749 | XM_001915547 // LOC100058376 // anaphase-promoting complex subunit 7-like // --- // 100  | LOC100058376 | Cluster0004 |

|          |                                                                                           |              |             |
|----------|-------------------------------------------------------------------------------------------|--------------|-------------|
| 15095505 | ENSECAT00000020320 // LOC100058416 // probable fructose-2,6-bisphosphatase TIGAR-like /   | LOC100058416 | Cluster0004 |
| 14961836 | XM_001504001 // LOC100058439 // protein Njmu-R1-like // --- // 100058439 /// ENSECAT000   | LOC100058439 | Cluster0004 |
| 15111388 | XM_001491421 // LOC100058462 // mediator of RNA polymerase II transcription subunit 17-   | LOC100058462 | Cluster0004 |
| 15048243 | XM_001491443 // LOC100058497 // cyclin-dependent kinase 2-interacting protein-like // -   | LOC100058497 | Cluster0004 |
| 14973924 | ENSECAT00000014510 // LOC100058529 // probable palmitoyltransferase ZDHHC24-like // ---   | LOC100058529 | Cluster0004 |
| 15014054 | XM_001496004 // LOC100058535 // mitochondrial import inner membrane translocase subunit   | LOC100058535 | Cluster0004 |
| 15101669 | ENSECAT00000014273 // LOC100058626 // uncharacterized protein C12orf41 homolog // --- /   | LOC100058626 | Cluster0004 |
| 15133050 | XM_003365863 // LOC100058639 // septin-6-like // --- // 100058639 /// XM_003365864 // L   | LOC100058639 | Cluster0004 |
| 15133769 | XM_003365923 // LOC100058834 // b-cell receptor-associated protein 31-like // --- // 10   | LOC100058834 | Cluster0004 |
| 15129715 | XM_001491785 // LOC100058835 // NADH dehydrogenase [ubiquinone] I alpha subcomplex subu   | LOC100058835 | Cluster0004 |
| 15030704 | XM_001491355 // LOC100058853 // chloride intracellular channel protein 1-like // --- //   | LOC100058853 | Cluster0004 |
| 15102574 | XM_001504780 // LOC100058867 // SAP domain-containing ribonucleoprotein-like // --- //    | LOC100058867 | Cluster0004 |
| 15130398 | XM_001491684 // LOC100058868 // ATP-binding cassette sub-family D member 1-like // ---    | LOC100058868 | Cluster0004 |
| 15092242 | XM_001917929 // LOC100058893 // ATP synthase subunit b, mitochondrial-like // --- // 10   | LOC100058893 | Cluster0004 |
| 15073024 | XM_001490466 // LOC100058947 // probable saccharopine dehydrogenase-like // --- // 1000   | LOC100058947 | Cluster0004 |
| 14961954 | ENSECAT00000016594 // LOC100058999 // transmembrane protein 199-like // --- // 10005899   | LOC100058999 | Cluster0004 |
| 15118885 | ENSECAT00000006505 // LOC100059094 // RILP-like protein 1-like // --- // 100059094 ///    | LOC100059094 | Cluster0004 |
| 15051784 | ENSECAT00000008409 // LOC100059122 // transmembrane protein C9orf5-like // --- // 10005   | LOC100059122 | Cluster0004 |
| 14974675 | XM_001493487 // LOC100059133 // aminoacyl tRNA synthase complex-interacting multifuncti   | LOC100059133 | Cluster0004 |
| 15115047 | XM_001498352 // LOC100059174 // general transcription factor IIH subunit 3-like // ---    | LOC100059174 | Cluster0004 |
| 15119431 | ENSECAT00000027140 // LOC100059211 // uncharacterized protein C18orf8-like // --- // 10   | LOC100059211 | Cluster0004 |
| 14991601 | ENSECAT00000016576 // LOC100059384 // phosphatase-like protein 3-like // --- // 100059384 | LOC100059384 | Cluster0004 |
| 15054134 | XM_001491997 // LOC100059393 // tryptophan-rich protein-like // --- // 100059393 /// EN   | LOC100059393 | Cluster0004 |
| 15087365 | XM_001500218 // LOC100059510 // suppressor of IKBKE 1-like // --- // 100059510 /// ENSE   | LOC100059510 | Cluster0004 |
| 15095563 | XM_001492075 // LOC100059512 // CD9 antigen-like // --- // 100059512 /// ENSECAT0000000   | LOC100059512 | Cluster0004 |
| 15074470 | XM_001492101 // LOC100059547 // ubiquitin carboxyl-terminal hydrolase isozyme L5-like /   | LOC100059547 | Cluster0004 |
| 15114785 | ENSECAT00000023915 // LOC100059653 // e3 ubiquitin-protein ligase RNF34-like // --- //    | LOC100059653 | Cluster0004 |
| 15098299 | XM_001492223 // LOC100059724 // YEATS domain-containing protein 4-like // --- // 100059   | LOC100059724 | Cluster0004 |
| 14962228 | ENSECAT00000026314 // LOC100059869 // glyoxalase domain-containing protein 4-like // --   | LOC100059869 | Cluster0004 |
| 14974280 | ENSECAT00000002627 // LOC100060043 // nucleosome assembly protein 1-like 4-like // ---    | LOC100060043 | Cluster0004 |
| 14985152 | XM_003362783 // LOC100060090 // ras GTPase-activating protein-binding protein 1-like //   | LOC100060090 | Cluster0004 |
| 15014573 | XM_001501086 // LOC100060183 // serine/threonine-protein kinase PAK 2-like // --- // 10   | LOC100060183 | Cluster0004 |
| 15042010 | ENSECAT00000015073 // LOC100060288 // e3 ubiquitin-protein ligase UHRF2-like // --- //    | LOC100060288 | Cluster0004 |
| 15129119 | XM_001492629 // LOC100060331 // 60S ribosomal protein L36a-like // --- // 100060331 ///   | LOC100060331 | Cluster0004 |
| 14967935 | XM_001504727 // LOC100060592 // tax1-binding protein 3-like // --- // 100060592 /// ENS   | LOC100060592 | Cluster0004 |
| 14944174 | XM_001492833 // LOC100060623 // zinc finger RAD18 domain-containing protein C1orf124 ho   | LOC100060623 | Cluster0004 |
| 15055292 | XM_001492982 // LOC100060848 // Down syndrome critical region protein 3-like // --- //    | LOC100060848 | Cluster0004 |
| 14972946 | ENSECAT00000015673 // LOC100060920 // 39S ribosomal protein L16, mitochondrial-like //    | LOC100060920 | Cluster0004 |
| 15014887 | XM_001917233 // LOC100060927 // general transcription factor IIE subunit 1-like // ---    | LOC100060927 | Cluster0004 |
| 15005251 | XM_001493104 // LOC100061031 // response gene to complement 32 protein-like // --- // 1   | LOC100061031 | Cluster0004 |
| 15060049 | XM_001493279 // LOC100061266 // thyroid transcription factor 1-associated protein 26-li   | LOC100061266 | Cluster0004 |
| 14971677 | XM_001497566 // LOC100061284 // glutamine-dependent NAD(+) synthetase-like // --- // 10   | LOC100061284 | Cluster0004 |
| 14982551 | XM_001503978 // LOC100061405 // histone deacetylase 3-like // --- // 100061405 /// ENSE   | LOC100061405 | Cluster0004 |
| 15084470 | XM_001493405 // LOC100061486 // calcyclin-binding protein-like // --- // 100061486 ///    | LOC100061486 | Cluster0004 |
| 14936868 | XM_001493472 // LOC100061580 // tyrosine-protein phosphatase non-receptor type 9-like /   | LOC100061580 | Cluster0004 |
| 15128159 | ENSECAT00000020951 // LOC100061736 // structural maintenance of chromosomes protein 1A-   | LOC100061736 | Cluster0004 |
| 15020213 | XM_001500334 // LOC100061820 // peptidyl-prolyl cis-trans isomerase D-like // --- // 10   | LOC100061820 | Cluster0004 |
| 15015333 | XM_001503437 // LOC100061942 // PEST proteolytic signal-containing nuclear protein-like   | LOC100061942 | Cluster0004 |
| 15039221 | XM_001490636 // LOC100062054 // DNA-directed RNA polymerase III subunit RPC6-like // --   | LOC100062054 | Cluster0004 |
| 14942766 | ENSECAT00000023581 // LOC100062076 // ribonuclease P protein subunit p30-like // --- //   | LOC100062076 | Cluster0004 |
| 14975583 | XM_001493817 // LOC100062129 // eukaryotic translation initiation factor 4H-like // ---   | LOC100062129 | Cluster0004 |
| 14975592 | XM_001493840 // LOC100062168 // linker for activation of T-cells family member 2-like /   | LOC100062168 | Cluster0004 |
| 15134063 | XM_001498280 // LOC100062170 // trimethyllysine dioxygenase, mitochondrial-like // ---    | LOC100062170 | Cluster0004 |
| 15068877 | ENSECAT00000009689 // LOC100062226 // protein FAM192A-like // --- // 100062226            | LOC100062226 | Cluster0004 |

|          |                                                                                          |              |             |
|----------|------------------------------------------------------------------------------------------|--------------|-------------|
| 15073964 | ENSECAT00000008202 // LOC100062283 // PPPDE peptidase domain-containing protein 1-like   | LOC100062283 | Cluster0004 |
| 15102361 | XM_001504559 // LOC100062404 // chromobox protein homolog 5-like // --- // 100062404 //  | LOC100062404 | Cluster0004 |
| 14936980 | XM_001494059 // LOC100062522 // ubiquitin-like protein 7-like // --- // 100062522 // X   | LOC100062522 | Cluster0004 |
| 14936990 | XM_001917675 // LOC100062559 // semaphorin-7A-like // --- // 100062559 // ENSECAT000000  | LOC100062559 | Cluster0004 |
| 15106847 | ENSECAT00000015914 // LOC100063117 // methylosome subunit pICln-like // --- // 100063117 | LOC100063117 | Cluster0004 |
| 15083600 | ENSECAT00000011847 // LOC100063507 // ATP-binding cassette sub-family F member 2-like /  | LOC100063507 | Cluster0004 |
| 14979333 | XM_001501595 // LOC100063884 // transmembrane protein C16orf54-like // --- // 100063884  | LOC100063884 | Cluster0004 |
| 15117677 | ENSECAT00000019181 // LOC100063907 // mitochondrial fission process protein 1-like // -  | LOC100063907 | Cluster0004 |
| 15122128 | XM_001494974 // LOC100063908 // tetratricopeptide repeat protein 35-like // --- // 1000  | LOC100063908 | Cluster0004 |
| 14935685 | ENSECAT00000008181 // LOC100064139 // glutamate dehydrogenase 1, mitochondrial-like //   | LOC100064139 | Cluster0004 |
| 14957348 | ENSECAT00000013069 // LOC100064179 // uncharacterized LOC100064179 // --- // 100064179   | LOC100064179 | Cluster0004 |
| 15110324 | XM_001505075 // LOC100064265 // transmembrane protein 218-like // --- // 100064265 //    | LOC100064265 | Cluster0004 |
| 14976061 | ENSECAT00000018947 // LOC100064282 // battenin-like // --- // 100064282 // XM_00150211   | LOC100064282 | Cluster0004 |
| 14979443 | ENSECAT000000021076 // LOC100064341 // elongation factor Tu, mitochondrial-like // --- / | LOC100064341 | Cluster0004 |
| 15039343 | ENSECAT00000019651 // LOC100064380 // UPF0492 protein C20orf94-like // --- // 100064380  | LOC100064380 | Cluster0004 |
| 15101022 | XM_001502728 // LOC100064589 // cell cycle regulator Mat89Bb homolog // --- // 10006458  | LOC100064589 | Cluster0004 |
| 15000554 | ENSECAT00000026507 // LOC100064728 // kelch-like protein 18-like // --- // 100064728 //  | LOC100064728 | Cluster0004 |
| 15076896 | XM_001915738 // LOC100064761 // biliverdin reductase A-like // --- // 100064761 // ENS   | LOC100064761 | Cluster0004 |
| 15101070 | XM_001502934 // LOC100064789 // endoplasmic reticulum-Golgi intermediate compartment pr  | LOC100064789 | Cluster0004 |
| 14932645 | XM_001495606 // LOC100064829 // non-structural maintenance of chromosomes element 4 hom  | LOC100064829 | Cluster0004 |
| 15093182 | XM_001497167 // LOC100064844 // ribosome production factor 1-like // --- // 100064844 // | LOC100064844 | Cluster0004 |
| 15067753 | XM_001495692 // LOC100064945 // RELT-like protein 1-like // --- // 100064945 // ENSECA   | LOC100064945 | Cluster0004 |
| 15077709 | ENSECAT00000015810 // LOC100064947 // transmembrane protein 106B-like // --- // 1000649  | LOC100064947 | Cluster0004 |
| 15082918 | XM_001500519 // LOC100065055 // modulator of retrovirus infection homolog // --- // 100  | LOC100065055 | Cluster0004 |
| 15080786 | XM_001495776 // LOC100065072 // nudC domain-containing protein 3-like // --- // 1000650  | LOC100065072 | Cluster0004 |
| 14965195 | ENSECAT00000020237 // LOC100065120 // methyltransferase-like protein 2A-like // --- //   | LOC100065120 | Cluster0004 |
| 15057734 | XM_001916797 // LOC100065372 // protein CLN8-like // --- // 100065372 // ENSECAT000000   | LOC100065372 | Cluster0004 |
| 15131984 | ENSECAT00000012239 // LOC100065450 // oligophrenin-1-like // --- // 100065450 // XM_00   | LOC100065450 | Cluster0004 |
| 14984044 | XM_001504660 // LOC100065465 // tubulin-specific chaperone A-like // --- // 100065465 /  | LOC100065465 | Cluster0004 |
| 15035640 | XM_001496286 // LOC100065794 // UPF0600 protein C5orf51-like // --- // 100065794 // EN   | LOC100065794 | Cluster0004 |
| 14952575 | XM_001503886 // LOC100066096 // heat shock protein 67B2-like // --- // 100066096 // EN   | LOC100066096 | Cluster0004 |
| 15039501 | XM_001915990 // LOC100066127 // pantothenate kinase 2, mitochondrial-like // --- // 100  | LOC100066127 | Cluster0004 |
| 15128390 | ENSECAT00000000280 // LOC100066275 // protein YIPF6-like // --- // 100066275 // XM_001   | LOC100066275 | Cluster0004 |
| 15070378 | XM_001496615 // LOC100066296 // methionine aminopeptidase 1-like // --- // 100066296 //  | LOC100066296 | Cluster0004 |
| 15116156 | XM_001496619 // LOC100066302 // e3 ubiquitin-protein ligase RNF138-like // --- // 10006  | LOC100066302 | Cluster0004 |
| 14956880 | XM_001503938 // LOC100066344 // autophagy protein 5-like // --- // 100066344 // XM_001   | LOC100066344 | Cluster0004 |
| 15039553 | XM_001496720 // LOC100066461 // attractin-like // --- // 100066461 // ENSECAT000000179   | LOC100066461 | Cluster0004 |
| 15100599 | XM_001496928 // LOC100066737 // heme-binding protein 1-like // --- // 100066737 // ENS   | LOC100066737 | Cluster0004 |
| 15096038 | ENSECAT00000019529 // LOC100066759 // uncharacterized protein KIAA1467-like // --- // 1  | LOC100066759 | Cluster0004 |
| 15088609 | XM_001496963 // LOC100066781 // GPI-anchor transamidase-like // --- // 100066781 // EN   | LOC100066781 | Cluster0004 |
| 15011858 | ENSECAT00000009103 // LOC100066877 // YEATS domain-containing protein 2-like // --- //   | LOC100066877 | Cluster0004 |
| 15119950 | ENSECAT00000021963 // LOC100067081 // zinc finger protein 396-like // --- // 100067081   | LOC100067081 | Cluster0004 |
| 15076420 | XM_001497243 // LOC100067124 // peroxisomal biogenesis factor 3-like // --- // 10006712  | LOC100067124 | Cluster0004 |
| 15028723 | ENSECAT00000006940 // LOC100067213 // kelch domain-containing protein 3-like // --- //   | LOC100067213 | Cluster0004 |
| 15093351 | ENSECAT000000021689 // LOC100067295 // geranylgeranyl transferase type-2 subunit beta-li | LOC100067295 | Cluster0004 |
| 15124520 | XM_001497477 // LOC100067415 // putative deoxyribonuclease TATDN1-like // --- // 100067  | LOC100067415 | Cluster0004 |
| 15011264 | XM_001505112 // LOC100067464 // ribosome biogenesis protein WDR12-like // --- // 100067  | LOC100067464 | Cluster0004 |
| 14932809 | ENSECAT00000007590 // LOC100067493 // shootin-1-like // --- // 100067493 // XM_0014947   | LOC100067493 | Cluster0004 |
| 15095129 | XM_001497625 // LOC100067637 // protein phosphatase 1 regulatory subunit 7-like // ---   | LOC100067637 | Cluster0004 |
| 15031767 | XM_001502257 // LOC100067678 // 39S ribosomal protein L14, mitochondrial-like // --- //  | LOC100067678 | Cluster0004 |
| 14965825 | ENSECAT000000021406 // LOC100067814 // protein CASC3-like // --- // 100067814 // XM_001  | LOC100067814 | Cluster0004 |
| 15103994 | ENSECAT00000011477 // LOC100067852 // centrosomal protein of 57 kDa-like // --- // 1000  | LOC100067852 | Cluster0004 |
| 15011129 | ENSECAT00000015574 // LOC100067910 // protein FAM126B-like // --- // 100067910 // XM_0   | LOC100067910 | Cluster0004 |
| 15122520 | ENSECAT00000023507 // LOC100068097 // myc proto-oncogene protein-like // --- // 1000680  | LOC100068097 | Cluster0004 |

|          |                                                                                          |              |             |
|----------|------------------------------------------------------------------------------------------|--------------|-------------|
| 14956056 | XM_001498010 // LOC100068130 // sialin-like // --- // 100068130 // ENSECAT00000016980    | LOC100068130 | Cluster0004 |
| 15058712 | XM_001498677 // LOC100068154 // WASH complex subunit 7-like // --- // 100068154 // ENS   | LOC100068154 | Cluster0004 |
| 15043902 | ENSECAT00000019100 // LOC100068266 // BAG family molecular chaperone regulator 1-like /  | LOC100068266 | Cluster0004 |
| 15016678 | XM_001503336 // LOC100068301 // palmitoyl-protein thioesterase 1-like // --- // 1000683  | LOC100068301 | Cluster0004 |
| 15082886 | XM_001498216 // LOC100068361 // coiled-coil-helix-coiled-coil-helix domain-containing p  | LOC100068361 | Cluster0004 |
| 15062274 | ENSECAT00000021501 // LOC100068422 // 3-hydroxyacyl-CoA dehydratase 1-like // --- // 10  | LOC100068422 | Cluster0004 |
| 15050887 | XM_001498302 // LOC100068463 // ubiquitin-associated domain-containing protein 1-like /  | LOC100068463 | Cluster0004 |
| 15124597 | XM_003365630 // LOC100068561 // protein FAM49B-like // --- // 100068561 // ENSECAT00000  | LOC100068561 | Cluster0004 |
| 14984544 | XM_001498575 // LOC100068758 // eukaryotic translation initiation factor 4E type 1B-lik  | LOC100068758 | Cluster0004 |
| 14992348 | ENSECAT00000011523 // LOC100068778 // 39S ribosomal protein L19, mitochondrial-like //   | LOC100068778 | Cluster0004 |
| 15016753 | ENSECAT00000015888 // LOC100068889 // rhomboid-related protein 2-like // --- // 1000688  | LOC100068889 | Cluster0004 |
| 15124723 | ENSECAT00000025889 // LOC100068961 // src-like-adaptor-like // --- // 100068961 // XM_   | LOC100068961 | Cluster0004 |
| 15100973 | ENSECAT00000000404 // LOC100068969 // uncharacterized LOC100068969 // --- // 100068969   | LOC100068969 | Cluster0004 |
| 14956167 | XM_003362360 // LOC100068991 // CDGSH iron-sulfur domain-containing protein 1-like // -  | LOC100068991 | Cluster0004 |
| 15008431 | XM_001498888 // LOC100069061 // cyclin-Y-like protein 1-like // --- // 100069061 // EN   | LOC100069061 | Cluster0004 |
| 15050362 | XM_001499226 // LOC100069734 // exosome complex component RRP4-like // --- // 100069734  | LOC100069734 | Cluster0004 |
| 15109536 | ENSECAT00000025826 // LOC100069813 // KDEL motif-containing protein 2-like // --- // 10  | LOC100069813 | Cluster0004 |
| 15052925 | ENSECAT00000020276 // LOC100069900 // uncharacterized protein C9orf78-like // --- // 10  | LOC100069900 | Cluster0004 |
| 14966304 | ENSECAT00000019226 // LOC100069924 // leucine-rich repeat-containing protein 59-like //  | LOC100069924 | Cluster0004 |
| 15025522 | XM_001499727 // LOC100070044 // transmembrane protein 131-like // --- // 100070044 //    | LOC100070044 | Cluster0004 |
| 14933286 | ENSECAT00000021996 // LOC100070070 // UPF0668 protein C10orf76-like // --- // 100070070  | LOC100070070 | Cluster0004 |
| 15061101 | XM_001499842 // LOC100070178 // SUN domain-containing protein 2-like // --- // 10007017  | LOC100070178 | Cluster0004 |
| 15126744 | XM_003365690 // LOC100070253 // protein cappuccino homolog // --- // 100070253 // ENSE   | LOC100070253 | Cluster0004 |
| 15069971 | ENSECAT00000010421 // LOC100070274 // palmitoyltransferase ZDHHC7-like // --- // 100070  | LOC100070274 | Cluster0004 |
| 15063713 | ENSECAT00000009117 // LOC100070366 // uncharacterized protein C10orf18-like // --- // 1  | LOC100070366 | Cluster0004 |
| 15012696 | XM_001500027 // LOC100070376 // integrin beta-5-like // --- // 100070376 // ENSECAT000   | LOC100070376 | Cluster0004 |
| 15104426 | ENSECAT00000013223 // LOC100070452 // uncharacterized protein C11orf52-like // --- // 1  | LOC100070452 | Cluster0004 |
| 15059238 | ENSECAT00000024097 // LOC100070463 // small G protein signaling modulator 3-like // ---  | LOC100070463 | Cluster0004 |
| 15088939 | XM_001500154 // LOC100070493 // TM2 domain-containing protein 1-like // --- // 10007049  | LOC100070493 | Cluster0004 |
| 14990219 | XM_001500160 // LOC100070497 // protein FAM98A-like // --- // 100070497 // ENSECAT00000  | LOC100070497 | Cluster0004 |
| 14946966 | XM_001918213 // LOC100070638 // uncharacterized LOC100070638 // --- // 100070638 // EN   | LOC100070638 | Cluster0004 |
| 15040444 | ENSECAT000000021700 // LOC100070847 // mitochondrial import receptor subunit TOM34-like  | LOC100070847 | Cluster0004 |
| 15023050 | XM_001500535 // LOC100070854 // protein FAM76A-like // --- // 100070854 // ENSECAT00000  | LOC100070854 | Cluster0004 |
| 15032827 | ENSECAT000000012102 // LOC100070946 // pyroglutamyl-peptidase 1-like // --- // 100070946 | LOC100070946 | Cluster0004 |
| 15013076 | ENSECAT000000024846 // LOC100071372 // n-alpha-acetyltransferase 50, NatE catalytic subu | LOC100071372 | Cluster0004 |
| 15023455 | XM_001501495 // LOC100071667 // complement C1q subcomponent subunit B-like // --- // 10  | LOC100071667 | Cluster0004 |
| 14985324 | XM_001503782 // LOC100071700 // grpE protein homolog 2, mitochondrial-like // --- // 10  | LOC100071700 | Cluster0004 |
| 15128846 | XM_001501152 // LOC100071723 // SH3 domain-binding glutamic acid-rich-like protein-like  | LOC100071723 | Cluster0004 |
| 15128752 | XM_001501735 // LOC100071798 // UPF0368 protein Cxorf26-like // --- // 100071798 // EN   | LOC100071798 | Cluster0004 |
| 14952827 | ENSECAT00000014894 // LOC100072366 // general transcription factor 3C polypeptide 6-lik  | LOC100072366 | Cluster0004 |
| 14994560 | XM_001502466 // LOC100072510 // cleavage and polyadenylation specificity factor subunit  | LOC100072510 | Cluster0004 |
| 14994617 | ENSECAT00000010440 // LOC100072610 // radical S-adenosyl methionine domain-containing p  | LOC100072610 | Cluster0004 |
| 14982921 | XM_001502713 // LOC100072697 // uncharacterized LOC100072697 // --- // 100072697 // EN   | LOC100072697 | Cluster0004 |
| 14943290 | XM_001502747 // LOC100072720 // inorganic pyrophosphatase-like // --- // 100072720 //    | LOC100072720 | Cluster0004 |
| 14968155 | ENSECAT00000026927 // LOC100072742 // f-box only protein 39-like // --- // 100072742 //  | LOC100072742 | Cluster0004 |
| 14962593 | ENSECAT00000010791 // LOC100072797 // putative ATP-dependent RNA helicase DHX33-like //  | LOC100072797 | Cluster0004 |
| 14934706 | ENSECAT00000002783 // LOC100072806 // anaphase-promoting complex subunit 16-like // ---  | LOC100072806 | Cluster0004 |
| 14962788 | ENSECAT00000007266 // LOC100072954 // dermal papilla-derived protein 6-like // --- // 1  | LOC100072954 | Cluster0004 |
| 14957594 | XM_001503335 // LOC100073104 // syntaxin-7-like // --- // 100073104 // ENSECAT000000021  | LOC100073104 | Cluster0004 |
| 14986533 | XM_001918095 // LOC100073158 // AP-3 complex subunit sigma-1-like // --- // 100073158 /  | LOC100073158 | Cluster0004 |
| 14983384 | XM_003362836 // LOC100073160 // ubiquitin-like protein ATG12-like // --- // 100073160 // | LOC100073160 | Cluster0004 |
| 14986785 | ENSECAT00000012224 // LOC100073217 // membrane protein FAM174A-like // --- // 100073217  | LOC100073217 | Cluster0004 |
| 15125111 | ENSECAT00000018149 // LOC100147640 // plectin-like // --- // 100147640 // ENSECAT000000  | LOC100147640 | Cluster0004 |
| 15028599 | XM_003363713 // LOC100629249 // mitochondrial import receptor subunit TOM6 homolog // -  | LOC100629249 | Cluster0004 |

|          |                                                                                                   |              |             |
|----------|---------------------------------------------------------------------------------------------------|--------------|-------------|
| 15051612 | ENSECAT00000002358 // LOC100629329 // 39S ribosomal protein L50, mitochondrial-like //            | LOC100629329 | Cluster0004 |
| 14961595 | ENSECAT000000024855 // LOC100629929 // zinc finger HIT domain-containing protein 3-like           | LOC100629929 | Cluster0004 |
| 15055596 | XM_003364190 // LOC100630038 // pituitary tumor-transforming gene 1 protein-interacting           | LOC100630038 | Cluster0004 |
| 14985108 | XM_003362867 // LOC100630302 // histone deacetylase complex subunit SAP30L-like // ---            | LOC100630302 | Cluster0004 |
| 14999599 | XM_003363126 // LOC100630485 // ribonuclease P protein subunit p14-like // --- // 10063           | LOC100630485 | Cluster0004 |
| 15093592 | XM_003365065 // LOC100630509 // leptin receptor gene-related protein-like // --- // 100           | LOC100630509 | Cluster0004 |
| 15130532 | XM_003365909 // LOC100630700 // protein FAM50A-like // --- // 100630700 // ENSECAT00000           | LOC100630700 | Cluster0004 |
| 15081257 | XM_003364824 // LOC100630906 // transmembrane protein C7orf23 homolog // --- // 1006309           | LOC100630906 | Cluster0004 |
| 15092153 | XM_001495327 // LRIG2 // leucine-rich repeats and immunoglobulin-like domains 2 // ---            | LRIG2        | Cluster0004 |
| 14984323 | ENSECAT000000026630 // MAML1 // mastermind-like 1 (Drosophila) // --- // 100067311 // X           | MAML1        | Cluster0004 |
| 15046385 | XM_001492048 // MARK3 // MAP/microtubule affinity-regulating kinase 3 // --- // 1000594           | MARK3        | Cluster0004 |
| 15097862 | XM_001488891 // MARS // methionyl-tRNA synthetase // --- // 100053373 // ENSECAT0000000           | MARS         | Cluster0004 |
| 15088442 | ENSECAT000000011655 // MCOLN2 // mucolipin 2 // --- // 100052719 // XM_001496833 // MCO           | MCOLN2       | Cluster0004 |
| 15131392 | XM_001489243 // MED14 // mediator complex subunit 14 // --- // 100050409 // ENSECAT000            | MED14        | Cluster0004 |
| 14967812 | ENSECAT000000014229 // METTL16 // methyltransferase like 16 // --- // 100060313 // XM_0           | METTL16      | Cluster0004 |
| 15024052 | ENSECAT000000017643 // MFN2 // mitofusin 2 // --- // ---                                          | MFN2         | Cluster0004 |
| 15020790 | ENSECAT000000007596 // MFSD8 // major facilitator superfamily domain containing 8 // ---          | MFSD8        | Cluster0004 |
| 15077657 | ENSECAT000000023405 // MIOS // missing oocyte, meiosis regulator, homolog (Drosophila) /          | MIOS         | Cluster0004 |
| 15132189 | NR_033090 // MIR421 // microRNA mir-421 // --- // 100314944                                       | MIR421       | Cluster0004 |
| 14933630 | ENSECAT000000010382 // MMS19 // MMS19 nucleotide excision repair homolog (S. cerevisiae)          | MMS19        | Cluster0004 |
| 15113666 | ENSECAT000000017550 // MORC2 // MORC family CW-type zinc finger 2 // --- // 100063412 //          | MORC2        | Cluster0004 |
| 15127040 | XM_001917193 // MOSPD2 // motile sperm domain containing 2 // --- // 100055695 // ENSE            | MOSPD2       | Cluster0004 |
| 15133995 | ENSECAT000000010186 // MPP1 // membrane protein, palmitoylated 1, 55kDa // --- // 100063          | MPP1         | Cluster0004 |
| 15057294 | ENSECAT000000011779 // MSR1 // macrophage scavenger receptor 1 // --- // 100053116 // X           | MSR1         | Cluster0004 |
| 15026873 | ENSECAT000000021397 // MYLIP // myosin regulatory light chain interacting protein // ---          | MYLIP        | Cluster0004 |
| 15032580 | ENSECAT000000012036 // MYO9B // myosin IXB // --- // 100069995 // ENSECAT00000012043 //           | MYO9B        | Cluster0004 |
| 15114631 | ENSECAT000000009442 // NAA25 // N(alpha)-acetyltransferase 25, NatB auxiliary subunit //          | NAA25        | Cluster0004 |
| 14977041 | ENSECAT000000012599 // NAGPA // N-acetylglucosamine-1-phosphodiester alpha-N-acetylgluco          | NAGPA        | Cluster0004 |
| 14965520 | ENSECAT000000007802 // NBR1 // neighbor of BRCA1 gene 1 // --- // 100051928 // XM_00336           | NBR1         | Cluster0004 |
| 15097390 | ENSECAT000000016276 // NCKAP1L // NCK-associated protein 1-like // --- // 100062541               | NCKAP1L      | Cluster0004 |
| 15058287 | ENSECAT000000014574 // NEDD1 // neural precursor cell expressed, developmentally down-re          | NEDD1        | Cluster0004 |
| 15063737 | ENSECAT000000022811 // NET1 // neuroepithelial cell transforming 1 // --- // 100070450 /          | NET1         | Cluster0004 |
| 14941610 | XM_001495643 // NHLRC2 // NHL repeat containing 2 // --- // 100059070 // ENSECAT0000000           | NHLRC2       | Cluster0004 |
| 15008098 | XM_001497941 // NIF3L1 // NIF3 NGG1 interacting factor 3-like 1 (S. cerevisiae) // ---            | NIF3L1       | Cluster0004 |
| 14936613 | XM_003363641 // NIPA2 // non imprinted in Prader-Willi/Angelman syndrome 2 // --- // 10           | NIPA2        | Cluster0004 |
| 15035731 | ENSECAT000000020680 // NIPBL // Nipped-B homolog (Drosophila) // --- // 100053547                 | NIPBL        | Cluster0004 |
| 14961930 | XM_001504107 // NLK // nemo-like kinase // --- // 100058876 // ENSECAT00000010814 // N            | NLK          | Cluster0004 |
| 14933917 | XM_001917312 // NOC3L // nucleolar complex associated 3 homolog (S. cerevisiae) // ---            | NOC3L        | Cluster0004 |
| 14942103 | ENSECAT000000026677 // NOLC1 // nucleolar and coiled-body phosphoprotein 1 // --- // 100          | NOLC1        | Cluster0004 |
| 15099989 | ENSECAT000000013305 // NOP2 // NOP2 nucleolar protein homolog (yeast) // --- // 10005220          | NOP2         | Cluster0004 |
| 14951332 | ENSECAT000000022344 // NR1H2 // nuclear receptor subfamily 1, group H, member 2 // --- /          | NR1H2        | Cluster0004 |
| 15003376 | ENSECAT000000013896 // NUFIP1 // nuclear fragile X mental retardation protein interactin          | NUFIP1       | Cluster0004 |
| 15033653 | XM_001499483 // NUP155 // nucleoporin 155kDa // --- // 100053405 // ENSECAT000000007933           | NUP155       | Cluster0004 |
| 15073203 | ENSECAT000000015379 // NVL // nuclear VCP-like // --- // 100055652 // XM_001489738 // N           | NVL          | Cluster0004 |
| 15129440 | ENSECAT000000015766 // NXT2 // nuclear transport factor 2-like export factor 2 // --- //          | NXT2         | Cluster0004 |
| 15009986 | XM_001499353 // OLA1 // Obg-like ATPase 1 // --- // 100053204 // ENSECAT00000017411 //            | OLA1         | Cluster0004 |
| 15012621 | XM_001501564 // OSBPL11 // OSBPL11 // oxysterol binding protein-like 11 // --- // 100060459 // EN | OSBPL11      | Cluster0004 |
| 15097619 | XM_001504804 // PA2G4 // proliferation-associated 2G4, 38kDa // --- // 100051912 // EN            | PA2G4        | Cluster0004 |
| 15071438 | ENSECAT000000021255 // PAICS // phosphoribosylaminoimidazole carboxylase, phosphoribosyl          | PAICS        | Cluster0004 |
| 15006036 | ENSECAT000000006281 // PCID2 // PCI domain containing 2 // --- // 100067141 // XM_00149           | PCID2        | Cluster0004 |
| 14937477 | ENSECAT000000028929 // PDCD7 // programmed cell death 7 // --- // ---                             | PDCD7        | Cluster0004 |
| 14969442 | XM_001503314 // PDHX // pyruvate dehydrogenase complex, component X // --- // 100059260           | PDHX         | Cluster0004 |
| 15002886 | ENSECAT000000021365 // PDS5B // PDS5, regulator of cohesion maintenance, homolog B (S. c          | PDS5B        | Cluster0004 |
| 15020371 | XM_001501357 // PET112 // PET112 homolog (yeast) // --- // 100062330 // ENSECAT00000000           | PET112       | Cluster0004 |

|          |                                                                                          |          |             |
|----------|------------------------------------------------------------------------------------------|----------|-------------|
| 14942357 | XM_001500347 // PI4K2A // phosphatidylinositol 4-kinase type 2 alpha // --- // 10007068  | PI4K2A   | Cluster0004 |
| 14981112 | XM_001915851 // PIGQ // phosphatidylinositol glycan anchor biosynthesis, class Q // ---  | PIGQ     | Cluster0004 |
| 15112875 | XM_001504950 // PIK3C2A // phosphoinositide-3-kinase, class 2, alpha polypeptide // ---  | PIK3C2A  | Cluster0004 |
| 15116337 | XM_001497768 // PIK3C3 // phosphoinositide-3-kinase, class 3 // --- // 100053039 // EN   | PIK3C3   | Cluster0004 |
| 15093028 | ENSECAT00000026949 // PKN2 // protein kinase N2 // --- // 100052266 // XM_001495405 //   | PKN2     | Cluster0004 |
| 15085179 | ENSECAT00000026856 // PLA2G4A // phospholipase A2, group IVA (cytosolic, calcium-depend  | PLA2G4A  | Cluster0004 |
| 14941242 | XM_001490808 // PLEKHA1 // pleckstrin homology domain containing, family A (phosphinos   | PLEKHA1  | Cluster0004 |
| 14959587 | ENSECAT00000027021 // PLEKHM1 // pleckstrin homology domain containing, family M (with   | PLEKHM1  | Cluster0004 |
| 14978575 | XM_001504456 // PLOD3 // procollagen-lysine, 2-oxoglutarate 5-dioxygenase 3 // --- // 1  | PLOD3    | Cluster0004 |
| 15086766 | ENSECAT00000023214 // POGZ // pogo transposable element with ZNF domain // --- // ---    | POGZ     | Cluster0004 |
| 15096663 | ENSECAT00000016911 // PPHLN1 // periphilin 1 // --- // 100054208 // XM_001488998 // PP   | PPHLN1   | Cluster0004 |
| 15059978 | ENSECAT00000021971 // PPP1R12A // protein phosphatase 1, regulatory subunit 12A // ---   | PPP1R12A | Cluster0004 |
| 15109600 | ENSECAT00000012956 // PPP2R1B // protein phosphatase 2, regulatory subunit A, beta // -  | PPP2R1B  | Cluster0004 |
| 15028709 | XM_001501546 // PPP2R5D // protein phosphatase 2, regulatory subunit B, delta // --- /   | PPP2R5D  | Cluster0004 |
| 15040678 | ENSECAT00000015862 // PREX1 // phosphatidylinositol-3,4,5-trisphosphate-dependent Rac e  | PREX1    | Cluster0004 |
| 15033530 | NM_001081803 // PRKAA1 // protein kinase, AMP-activated, alpha 1 catalytic subunit // 2  | PRKAA1   | Cluster0004 |
| 15106872 | XM_001495142 // PRKRIR // protein-kinase, interferon-inducible double stranded RNA depe  | PRKRIR   | Cluster0004 |
| 15064818 | ENSECAT00000009896 // PSKH1 // protein serine kinase H1 // --- // 100053657 // XM_0014   | PSKH1    | Cluster0004 |
| 15051976 | ENSECAT00000005057 // PTGR1 // prostaglandin reductase 1 // --- // ---                   | PTGR1    | Cluster0004 |
| 15029811 | XM_001916775 // RANBP9 // RAN binding protein 9 // --- // 100065036 // ENSECAT000000004  | RANBP9   | Cluster0004 |
| 15066609 | XM_001915658 // RASGEF1B // RasGEF domain family, member 1B // --- // 100146797 // ENS   | RASGEF1B | Cluster0004 |
| 15040128 | NM_001171746 // RBM12 // RNA binding motif protein 12 // --- // 100069590 // ENSECAT00   | RBM12    | Cluster0004 |
| 15092311 | XM_001496217 // RBM15 // RNA binding motif protein 15 // --- // 100058541 // ENSECAT00   | RBM15    | Cluster0004 |
| 14985461 | ENSECAT00000001501 // RBM27 // RNA binding motif protein 27 // --- // 100061055 // XM_   | RBM27    | Cluster0004 |
| 15000314 | XM_001496577 // RBM5 // RNA binding motif protein 5 // --- // 100052535 // ENSECAT0000   | RBM5     | Cluster0004 |
| 15003247 | XM_001489540 // RCBTB2 // regulator of chromosome condensation (RCC1) and BTB (POZ) dom  | RCBTB2   | Cluster0004 |
| 15018315 | ENSECAT00000026258 // RCC2 // regulator of chromosome condensation 2 // --- // ---       | RCC2     | Cluster0004 |
| 15089612 | ENSECAT00000014284 // RFWD2 // ring finger and WD repeat domain 2, E3 ubiquitin protein  | RFWD2    | Cluster0004 |
| 15069661 | XM_001501213 // RFWD3 // ring finger and WD repeat domain 3 // --- // 100055114 // ENS   | RFWD3    | Cluster0004 |
| 14967060 | ENSECAT00000010249 // RHOT1 // ras homolog family member T1 // --- // ---                | RHOT1    | Cluster0004 |
| 14974541 | ENSECAT00000005305 // RIC8A // resistance to inhibitors of cholinesterase 8 homolog A (  | RIC8A    | Cluster0004 |
| 15058797 | XM_001499080 // RIC8B // resistance to inhibitors of cholinesterase 8 homolog B (C. ele  | RIC8B    | Cluster0004 |
| 14988632 | XM_001497977 // RNF103 // ring finger protein 103 // --- // 100052907 // ENSECAT000000   | RNF103   | Cluster0004 |
| 15112051 | XM_001496568 // RNF121 // ring finger protein 121 // --- // 100066221 // ENSECAT000000   | RNF121   | Cluster0004 |
| 15048945 | ENSECAT00000019819 // RNF20 // ring finger protein 20, E3 ubiquitin protein ligase // -  | RNF20    | Cluster0004 |
| 15102647 | ENSECAT00000006650 // RNF41 // ring finger protein 41 // --- // 100052095 // XM_001504   | RNF41    | Cluster0004 |
| 14956463 | XM_001503749 // RNGTT // RNA guanylyltransferase and 5'-phosphatase // --- // 100065700  | RNGTT    | Cluster0004 |
| 14992055 | XM_001497468 // RPIA // ribose 5-phosphate isomerase A // --- // 100052643 // ENSECAT0   | RPIA     | Cluster0004 |
| 15061147 | XM_001501907 // RPL3 // ribosomal protein L3 // --- // 100070291 // ENSECAT00000022268   | RPL3     | Cluster0004 |
| 15090103 | ENSECAT000000023249 // RPS6KC1 // ribosomal protein S6 kinase, 52kDa, polypeptide 1 // - | RPS6KC1  | Cluster0004 |
| 15106830 | XM_001493213 // RSF1 // remodeling and spacing factor 1 // --- // 100051507 // ENSECAT   | RSF1     | Cluster0004 |
| 15101440 | ENSECAT000000025634 // SCAF11 // SR-related CTD-associated factor 11 // --- // ---       | SCAF11   | Cluster0004 |
| 15066772 | ENSECAT00000017448 // SDAD1 // SDA1 domain containing 1 // --- // 100057877 // XM_0014   | SDAD1    | Cluster0004 |
| 15026400 | ENSECAT00000017682 // SEC24B // SEC24 family, member B (S. cerevisiae) // --- // ---     | SEC24B   | Cluster0004 |
| 14952189 | ENSECAT00000022431 // SENP6 // SUMO1/sentrin specific peptidase 6 // --- // ---          | SENP6    | Cluster0004 |
| 15062525 | NM_001190419 // SEPHS1 // selenophosphate synthetase 1 // --- // 100056604 // ENSECAT0   | SEPHS1   | Cluster0004 |
| 15033431 | NM_001135605 // SEPP1 // selenoprotein P, plasma, 1 // --- // 100052968 // ENSECAT0000   | SEPP1    | Cluster0004 |
| 15075659 | ENSECAT00000013902 // SERAC1 // serine active site containing 1 // --- // 100051068 //   | SERAC1   | Cluster0004 |
| 14971165 | ENSECAT00000026515 // SF3B2 // splicing factor 3b, subunit 2, 145kDa // --- // 10005217  | SF3B2    | Cluster0004 |
| 15123383 | ENSECAT00000023014 // SGK3 // serum/glucocorticoid regulated kinase family, member 3 //  | SGK3     | Cluster0004 |
| 15026446 | XM_001503572 // SGMS2 // sphingomyelin synthase 2 // --- // 100072971 // ENSECAT000000   | SGMS2    | Cluster0004 |
| 15097830 | XM_001488536 // SHMT2 // serine hydroxymethyltransferase 2 (mitochondrial) // --- // 10  | SHMT2    | Cluster0004 |
| 15104403 | ENSECAT00000020171 // SIK2 // salt-inducible kinase 2 // --- // 100070391 // XM_001500   | SIK2     | Cluster0004 |
| 15087540 | NM_001081791 // SLC16A1 // solute carrier family 16, member 1 (monocarboxylic acid tran  | SLC16A1  | Cluster0004 |



|          |                                                                                          |          |             |
|----------|------------------------------------------------------------------------------------------|----------|-------------|
| 14964649 | XM_001916839 // SLC16A5 // solute carrier family 16, member 5 (monocarboxylic acid tran  | SLC16A5  | Cluster0004 |
| 15082896 | ENSECAT00000013045 // SLC35B4 // solute carrier family 35, member B4 // --- // 10006518  | SLC35B4  | Cluster0004 |
| 15033250 | ENSECAT00000015094 // SLC38A9 // solute carrier family 38, member 9 // --- // 100051821  | SLC38A9  | Cluster0004 |
| 15053950 | NM_001247992 // SLC5A3 // solute carrier family 5 (sodium/myo-inositol cotransporter),   | SLC5A3   | Cluster0004 |
| 15093971 | ENSECAT00000008039 // SMARCAL1 // SWI/SNF related, matrix associated, actin dependent r  | SMARCAL1 | Cluster0004 |
| 14976639 | XM_003362748 // SMG1 // smg-1 homolog, phosphatidylinositol 3-kinase-related kinase (C.  | SMG1     | Cluster0004 |
| 15090080 | ENSECAT00000023764 // SMYD2 // SET and MYND domain containing 2 // --- // 100052774 ///  | SMYD2    | Cluster0004 |
| 15064965 | XM_001497135 // SNTB2 // syntrophin, beta 2 (dystrophin-associated protein A1, 59kDa, b  | SNTB2    | Cluster0004 |
| 14946364 | EF397509 // SNX1 // sorting nexin 1 // --- // 100066873                                  | SNX1     | Cluster0004 |
| 14956385 | ENSECAT00000013411 // SNX14 // sorting nexin 14 // --- // 100065533                      | SNX14    | Cluster0004 |
| 15012635 | XM_001916714 // SNX4 // sorting nexin 4 // --- // 100060493 /// ENSECAT00000009246 // S  | SNX4     | Cluster0004 |
| 15094491 | ENSECAT00000023767 // SP140 // SP140 nuclear body protein // --- // ---                  | SP140    | Cluster0004 |
| 15096870 | ENSECAT00000005952 // SPATS2 // spermatogenesis associated, serine-rich 2 // --- // 100  | SPATS2   | Cluster0004 |
| 14975916 | ENSECAT00000009012 // SPN // sialophorin // --- // ---                                   | SPN      | Cluster0004 |
| 15047557 | XM_001491996 // SPTLC2 // serine palmitoyltransferase, long chain base subunit 2 // ---  | SPTLC2   | Cluster0004 |
| 14948614 | ENSECAT00000004529 // SPTSSA // serine palmitoyltransferase, small subunit A // --- //   | SPTSSA   | Cluster0004 |
| 15033102 | ENSECAT00000010936 // SREK1IP1 // SREK1-interacting protein 1 // --- // ---              | SREK1IP1 | Cluster0004 |
| 15032832 | ENSECAT00000018957 // SSBP4 // single stranded DNA binding protein 4 // --- // ---       | SSBP4    | Cluster0004 |
| 15007594 | ENSECAT00000013076 // SSFA2 // sperm specific antigen 2 // --- // 100053992              | SSFA2    | Cluster0004 |
| 14965709 | XM_001494738 // STAT5A // signal transducer and activator of transcription 5A // --- //  | STAT5A   | Cluster0004 |
| 15031361 | XM_001494965 // STK38 // serine/threonine kinase 38 // --- // 100063891 /// ENSECAT0000  | STK38    | Cluster0004 |
| 14966801 | ENSECAT00000009030 // SYNRG // synergin, gamma // --- // --- /// ENSECAT00000009061 //   | SYNRG    | Cluster0004 |
| 15124385 | ENSECAT00000026272 // TAF2 // TAF2 RNA polymerase II, TATA box binding protein (TBP)-as  | TAF2     | Cluster0004 |
| 14965120 | XM_001501300 // TANC2 // tetratricopeptide repeat, ankyrin repeat and coiled-coil conta  | TANC2    | Cluster0004 |
| 14975978 | ENSECAT00000022913 // TAOK2 // TAO kinase 2 // --- // ---                                | TAOK2    | Cluster0004 |
| 15035902 | XM_001498175 // TARS // threonyl-tRNA synthetase // --- // 100068323 /// ENSECAT0000002  | TARS     | Cluster0004 |
| 14999036 | ENSECAT00000011011 // TATDN2 // TatD DNase domain containing 2 // --- // 100051750 ///   | TATDN2   | Cluster0004 |
| 14997747 | XM_001495752 // TBC1D5 // TBC1 domain family, member 5 // --- // 100052179 /// XM_00336  | TBC1D5   | Cluster0004 |
| 15067444 | ENSECAT00000026467 // TEC // tec protein tyrosine kinase // --- // 100061381 /// XM_001  | TEC      | Cluster0004 |
| 15064780 | ENSECAT00000006382 // THAP11 // THAP domain containing 11 // --- // ---                  | THAP11   | Cluster0004 |
| 15082309 | ENSECAT00000012449 // THAP5 // THAP domain containing 5 // --- // 100070659 /// XM_0015  | THAP5    | Cluster0004 |
| 14958261 | AJ010315 // TIMP2 // TIMP metalloproteinase inhibitor 2 // --- // 100034134 /// EF077283 | TIMP2    | Cluster0004 |
| 14965173 | XM_001917101 // TLK2 // tousled-like kinase 2 // --- // 100054465 /// ENSECAT0000002319  | TLK2     | Cluster0004 |
| 15082379 | ENSECAT00000022495 // TMEM168 // transmembrane protein 168 // --- // 100055763 /// XM_0  | TMEM168  | Cluster0004 |
| 15098084 | XM_001916898 // TMEM5 // transmembrane protein 5 // --- // 100056566 /// ENSECAT0000001  | TMEM5    | Cluster0004 |
| 14947096 | XM_001918264 // TMEM62 // transmembrane protein 62 // --- // 100056447 /// ENSECAT00000  | TMEM62   | Cluster0004 |
| 15073140 | XM_001490778 // TMEM63A // transmembrane protein 63A // --- // 100057436 /// ENSECAT000  | TMEM63A  | Cluster0004 |
| 15120610 | ENSECAT00000026742 // TMX3 // thioredoxin-related transmembrane protein 3 // --- // 100  | TMX3     | Cluster0004 |
| 15046362 | ENSECAT00000012132 // TNFAIP2 // tumor necrosis factor, alpha-induced protein 2 // ---   | TNFAIP2  | Cluster0004 |
| 15120895 | ENSECAT00000014729 // TPD52 // tumor protein D52 // --- // ---                           | TPD52    | Cluster0004 |
| 15119860 | XM_001495283 // TRAPPC8 // trafficking protein particle complex 8 // --- // 100052273 /  | TRAPPC8  | Cluster0004 |
| 15124832 | ENSECAT00000025994 // TRAPPC9 // trafficking protein particle complex 9 // --- // 10006  | TRAPPC9  | Cluster0004 |
| 15089756 | NM_001256902 // TRIM59 // tripartite motif containing 59 // --- // 100049895 /// ENSECA  | TRIM59   | Cluster0004 |
| 14942004 | ENSECAT00000017754 // TRIM8 // tripartite motif containing 8 // --- // 100147211 /// XM  | TRIM8    | Cluster0004 |
| 14967789 | ENSECAT00000009800 // TSR1 // TSR1, 20S rRNA accumulation, homolog (S. cerevisiae) // -  | TSR1     | Cluster0004 |
| 14993616 | XM_001501379 // TTC27 // tetratricopeptide repeat domain 27 // --- // 100054467 /// ENS  | TTC27    | Cluster0004 |
| 15059641 | ENSECAT00000014407 // TTC38 // tetratricopeptide repeat domain 38 // --- // 100053315 /  | TTC38    | Cluster0004 |
| 14978898 | XM_001493787 // TYW1 // tRNA-yW synthesizing protein 1 homolog (S. cerevisiae) // --- /  | TYW1     | Cluster0004 |
| 14949289 | XM_001490648 // UBA2 // ubiquitin-like modifier activating enzyme 2 // --- // 100057234  | UBA2     | Cluster0004 |
| 14945349 | ENSECAT00000006122 // UBE3A // ubiquitin protein ligase E3A // --- // 100050725 /// XM_  | UBE3A    | Cluster0004 |
| 14979634 | ENSECAT00000013555 // UBF1 // ubiquitin family domain containing 1 // --- // ---         | UBF1     | Cluster0004 |
| 15090433 | XM_001491629 // UHMK1 // U2AF homology motif (UHM) kinase 1 // --- // 100058796 /// ENS  | UHMK1    | Cluster0004 |
| 15014658 | XM_001500039 // UMPS // uridine monophosphate synthetase // --- // 100070386 /// ENSECA  | UMPS     | Cluster0004 |
| 15032879 | ENSECAT00000011373 // UPF1 // UPF1 regulator of nonsense transcripts homolog (yeast) //  | UPF1     | Cluster0004 |

|          |                                                                                                 |          |             |
|----------|-------------------------------------------------------------------------------------------------|----------|-------------|
| 15093724 | ENSECAT00000011612 // USP1 // ubiquitin specific peptidase 1 // --- // 100070397 /// XM         | USP1     | Cluster0004 |
| 14974683 | XM_001493859 // USP42 // ubiquitin specific peptidase 42 // --- // 100062198 /// ENSECA         | USP42    | Cluster0004 |
| 15030728 | ENSECAT00000016174 // VARS // valyl-tRNA synthetase // --- // 100058924 /// XM_00149172         | VARS     | Cluster0004 |
| 14959958 | ENSECAT00000017794 // VAT1 // vesicle amine transport protein 1 homolog (T. californica         | VAT1     | Cluster0004 |
| 15121164 | XM_001494625 // VCIPI1 // valosin containing protein (p97)/p47 complex interacting prot         | VCIPI1   | Cluster0004 |
| 15047534 | ENSECAT00000021132 // VIPAR // VIPAR // VPS33B interacting protein, apical-basolateral polarity | VIPAR    | Cluster0004 |
| 15042971 | ENSECAT00000022743 // VPS13A // vacuolar protein sorting 13 homolog A (S. cerevisiae) /         | VPS13A   | Cluster0004 |
| 15068545 | XM_001490225 // VPS35 // vacuolar protein sorting 35 homolog (S. cerevisiae) // --- //          | VPS35    | Cluster0004 |
| 15004923 | XM_001914963 // VPS36 // vacuolar protein sorting 36 homolog (S. cerevisiae) // --- //          | VPS36    | Cluster0004 |
| 15091719 | XM_001488893 // VPS45 // vacuolar protein sorting 45 homolog (S. cerevisiae) // --- //          | VPS45    | Cluster0004 |
| 15103852 | ENSECAT00000011283 // XAB2 // XPA binding protein 2 // --- // 100060674 /// XM_00191693         | XAB2     | Cluster0004 |
| 15059264 | XM_001502287 // XPNPEP3 // X-prolyl aminopeptidase (aminopeptidase P) 3, putative // --         | XPNPEP3  | Cluster0004 |
| 15023481 | ENSECAT00000017310 // ZBTB40 // zinc finger and BTB domain containing 40 // --- // 1000         | ZBTB40   | Cluster0004 |
| 15074567 | XM_001492621 // ZBTB41 // zinc finger and BTB domain containing 41 // --- // 100051497          | ZBTB41   | Cluster0004 |
| 15007687 | ENSECAT00000018402 // ZC3H15 // zinc finger CCCH-type containing 15 // --- // ---               | ZC3H15   | Cluster0004 |
| 15118767 | XM_001496946 // ZCCHC8 // zinc finger, CCHC domain containing 8 // --- // 100058826 ///         | ZCCHC8   | Cluster0004 |
| 15057871 | ENSECAT00000007163 // ZDHHC17 // zinc finger, DHHC-type containing 17 // --- // 1000592         | ZDHHC17  | Cluster0004 |
| 14942345 | XM_001501299 // ZFYVE27 // zinc finger, FYVE domain containing 27 // --- // 100060913 //        | ZFYVE27  | Cluster0004 |
| 15022277 | ENSECAT00000008084 // ZMPSTE24 // zinc metallopeptidase STE24 homolog (S. cerevisiae) /         | ZMPSTE24 | Cluster0004 |
| 15078364 | XM_001500504 // ZNF277 // zinc finger protein 277 // --- // 100070827 /// ENSECAT000000         | ZNF277   | Cluster0004 |
| 14955997 | ENSECAT00000002231 // ZNF329 // zinc finger protein 329 // --- // ---                           | ZNF329   | Cluster0004 |
| 14984375 | XM_001497818 // ZNF354B // zinc finger protein 354B // --- // 100067884 /// ENSECAT0000         | ZNF354B  | Cluster0004 |
| 15116973 | XM_001915458 // ZNF407 // zinc finger protein 407 // --- // 100052274 /// ENSECAT000000         | ZNF407   | Cluster0004 |
| 15088261 | XM_001493570 // ZNF644 // zinc finger protein 644 // --- // 100051777 /// ENSECAT000000         | ZNF644   | Cluster0004 |
| 14957237 | ENSECAT00000014086 // ZUFSP // zinc finger with UFM1-specific peptidase domain // --- /         | ZUFSP    | Cluster0004 |
| 15065320 | ENSECAT00000009335 // AARS // alanyl-tRNA synthetase // --- // 100054983 /// XM_0015010         | AARS     | Cluster0005 |
| 15132209 | ENSECAT00000001168 // ABCB7 // ATP-binding cassette, sub-family B (MDR/TAP), member 7 /         | ABCB7    | Cluster0005 |
| 15062108 | XM_001494640 // AB11 // abl-interactor 1 // --- // 100055377 /// ENSECAT00000016630 //          | AB11     | Cluster0005 |
| 15105599 | ENSECAT00000011541 // ACAD8 // acyl-CoA dehydrogenase family, member 8 // --- // 100072         | ACAD8    | Cluster0005 |
| 14962768 | XM_001504761 // ACADVL // acyl-CoA dehydrogenase, very long chain // --- // 100061583 /         | ACADVL   | Cluster0005 |
| 14941680 | XM_001915998 // ACSL5 // acyl-CoA synthetase long-chain family member 5 // --- // 10005         | ACSL5    | Cluster0005 |
| 14977169 | ENSECAT000000026215 // ADCY9 // adenylate cyclase 9 // --- // 100066046 /// XM_001502248        | ADCY9    | Cluster0005 |
| 14992838 | ENSECAT00000012840 // AFTPH // aftiphilin // --- // 100063526                                   | AFTPH    | Cluster0005 |
| 14987308 | XM_001503946 // AGGF1 // angiogenic factor with G patch and FHA domains 1 // --- // 100         | AGGF1    | Cluster0005 |
| 15007474 | ENSECAT00000009408 // AGPS // alkylglycerone phosphate synthase // --- // ---                   | AGPS     | Cluster0005 |
| 15133293 | XM_001915156 // AIFM1 // apoptosis-inducing factor, mitochondrion-associated, 1 // ---          | AIFM1    | Cluster0005 |
| 15004936 | XM_001487974 // ALG11 // asparagine-linked glycosylation 11, alpha-1,2-mannosyltransfer         | ALG11    | Cluster0005 |
| 15093686 | XM_001499799 // ALG6 // asparagine-linked glycosylation 6, alpha-1,3-glucosyltransferas         | ALG6     | Cluster0005 |
| 15117972 | XM_001496710 // ANKRD13A // ankyrin repeat domain 13A // --- // 100066442 /// ENSECAT00         | ANKRD13A | Cluster0005 |
| 14943582 | XM_001503944 // AP3M1 // adaptor-related protein complex 3, mu 1 subunit // --- // 1000         | AP3M1    | Cluster0005 |
| 14961552 | XM_001918294 // APPBP2 // amyloid beta precursor protein (cytoplasmic tail) binding pro         | APPBP2   | Cluster0005 |
| 14999688 | XM_001491548 // APPL1 // adaptor protein, phosphotyrosine interaction, PH domain and le         | APPL1    | Cluster0005 |
| 15121109 | XM_001494559 // ARFGEF1 // ADP-ribosylation factor guanine nucleotide-exchange factor 1         | ARFGEF1  | Cluster0005 |
| 15090490 | ENSECAT00000012392 // ARHGAP30 // Rho GTPase activating protein 30 // --- // 100066336          | ARHGAP30 | Cluster0005 |
| 14940456 | ENSECAT00000018331 // ARHGAP5 // Rho GTPase activating protein 5 // --- // 100056199 ///        | ARHGAP5  | Cluster0005 |
| 15000469 | XM_001498598 // ARIH2 // ariadne homolog 2 (Drosophila) // --- // 100053691 /// ENSECAT         | ARIH2    | Cluster0005 |
| 14977858 | XM_001494690 // ARPC1B // actin related protein 2/3 complex, subunit 1B, 41kDa // --- /         | ARPC1B   | Cluster0005 |
| 14936384 | XM_001489692 // ASB7 // ankyrin repeat and SOCS box containing 7 // --- // 100050201 //         | ASB7     | Cluster0005 |
| 15121251 | XM_001496350 // ASPH // aspartate beta-hydroxylase // --- // 100065909 /// ENSECAT000000        | ASPH     | Cluster0005 |
| 15048112 | XM_001489195 // ATG2B // autophagy related 2B // --- // 100054652 /// ENSECAT0000000401         | ATG2B    | Cluster0005 |
| 15084195 | EU423855 // ATP1B1 // ATPase, Na+/K+ transporting, beta 1 polypeptide // --- // 1000339         | ATP1B1   | Cluster0005 |
| 14965688 | XM_003362552 // ATP6V0A1 // ATPase, H+ transporting, lysosomal V0 subunit a1 // --- //          | ATP6V0A1 | Cluster0005 |
| 15115080 | XM_001915444 // ATP6V0A2 // ATPase, H+ transporting, lysosomal V0 subunit a2 // --- //          | ATP6V0A2 | Cluster0005 |
| 15102796 | ENSECAT00000019940 // BAZ2A // bromodomain adjacent to zinc finger domain, 2A // --- //         | BAZ2A    | Cluster0005 |

|          |                                                                                            |            |             |
|----------|--------------------------------------------------------------------------------------------|------------|-------------|
| 15099566 | ENSECAT00000010760 // BCL2L13 // BCL2-like 13 (apoptosis facilitator) // --- // 1000550    | BCL2L13    | Cluster0005 |
| 14967579 | XM_001502104 // BLMH // bleomycin hydrolase // --- // 100072223 // ENSECAT00000020692      | BLMH       | Cluster0005 |
| 15053222 | ENSECAT000000023192 // BRD3 // bromodomain containing 3 // --- // 100066434 // XM_00191    | BRD3       | Cluster0005 |
| 15034349 | ENSECAT00000013879 // BRD9 // bromodomain containing 9 // --- // 100057849 // XM_00149     | BRD9       | Cluster0005 |
| 14935846 | ENSECAT00000018146 // BTBD1 // BTB (POZ) domain containing 1 // --- // 100068143 // XM     | BTBD1      | Cluster0005 |
| 15106996 | ENSECAT00000013130 // C2CD3 // C2 calcium-dependent domain containing 3 // --- // 10006    | C2CD3      | Cluster0005 |
| 15084070 | XM_001492532 // C4BPA // complement component 4 binding protein, alpha // --- // 100056    | C4BPA      | Cluster0005 |
| 15102342 | ENSECAT000000025888 // CALCOCO1 // calcium binding and coiled-coil domain 1 // --- // 10   | CALCOCO1   | Cluster0005 |
| 15050898 | ENSECAT00000018487 // CAMSAP1 // calmodulin regulated spectrin-associated protein 1 //     | CAMSAP1    | Cluster0005 |
| 15098217 | XM_001491339 // CAND1 // cullin-associated and neddylation-dissociated 1 // --- // 1000    | CAND1      | Cluster0005 |
| 15022297 | XM_001503360 // CAP1 // CAP, adenylate cyclase-associated protein 1 (yeast) // --- // 1    | CAP1       | Cluster0005 |
| 14969372 | ENSECAT00000008062 // CAPRIN1 // cell cycle associated protein 1 // --- // 100060513 //    | CAPRIN1    | Cluster0005 |
| 15088313 | XM_001495159 // CCBL2 // cysteine conjugate-beta lyase 2 // --- // 100052141 // ENSECA     | CCBL2      | Cluster0005 |
| 15077498 | ENSECAT000000024807 // CCDC132 // coiled-coil domain containing 132 // --- // 100051289    | CCDC132    | Cluster0005 |
| 14959412 | ENSECAT00000015048 // CCDC47 // coiled-coil domain containing 47 // --- // 100054134 //    | CCDC47     | Cluster0005 |
| 14989582 | ENSECAT000000007818 // CCDC88A // coiled-coil domain containing 88A // --- // ---          | CCDC88A    | Cluster0005 |
| 14989361 | ENSECAT00000018270 // CCT4 // chaperonin containing TCP1, subunit 4 (delta) // --- // 1    | CCT4       | Cluster0005 |
| 15073562 | ENSECAT000000016219 // CDC73 // cell division cycle 73, Paf1/RNA polymerase II complex c   | CDC73      | Cluster0005 |
| 15076823 | ENSECAT00000018342 // CDK13 // cyclin-dependent kinase 13 // --- // ---                    | CDK13      | Cluster0005 |
| 15002624 | XM_001490931 // CDK8 // cyclin-dependent kinase 8 // --- // 100050819 // ENSECAT0000000    | CDK8       | Cluster0005 |
| 15018974 | XM_001497360 // CEP104 // centrosomal protein 104kDa // --- // 100052540 // ENSECAT000     | CEP104     | Cluster0005 |
| 14964972 | ENSECAT000000022480 // CEP95 // centrosomal protein 95kDa // --- // 100064141 // XM_001    | CEP95      | Cluster0005 |
| 15019576 | ENSECAT000000026613 // CHMP7 // charged multivesicular body protein 7 // --- // 10005392   | CHMP7      | Cluster0005 |
| 14933451 | ENSECAT000000007996 // CHUK // conserved helix-loop-helix ubiquitously kinase // --- // 10 | CHUK       | Cluster0005 |
| 14972300 | XM_001915245 // CKAP5 // cytoskeleton associated protein 5 // --- // 100050886 // ENSE     | CKAP5      | Cluster0005 |
| 14937462 | XM_001498202 // CLPX // ClpX caseinolytic peptidase X homolog (E. coli) // --- // 10005    | CLPX       | Cluster0005 |
| 15066675 | XM_001491801 // CNOT6L // CCR4-NOT transcription complex, subunit 6-like // --- // 1000    | CNOT6L     | Cluster0005 |
| 14933520 | ENSECAT000000014816 // COX15 // COX15 homolog, cytochrome c oxidase assembly protein (ye   | COX15      | Cluster0005 |
| 14943835 | XM_001490352 // CSGALNACT2 // chondroitin sulfate N-acetylgalactosaminyltransferase 2 //   | CSGALNACT2 | Cluster0005 |
| 15037096 | ENSECAT000000007999 // CSNK2A1 // casein kinase 2, alpha 1 polypeptide // --- // ---       | CSNK2A1    | Cluster0005 |
| 15051765 | XM_001491865 // CTNNAL1 // catenin (cadherin-associated protein), alpha-like 1 // --- //   | CTNNAL1    | Cluster0005 |
| 15000906 | ENSECAT000000007477 // CTNNB1 // catenin (cadherin-associated protein), beta 1, 88kDa //   | CTNNB1     | Cluster0005 |
| 14933436 | XM_001500438 // CWF19L1 // CWF19-like 1, cell cycle control (S. pombe) // --- // 100060    | CWF19L1    | Cluster0005 |
| 15062469 | XM_001498475 // DCLRE1C // DNA cross-link repair 1C // --- // 100056337 // ENSECAT00000    | DCLRE1C    | Cluster0005 |
| 15092219 | ENSECAT000000014445 // DDX20 // DEAD (Asp-Glu-Ala-Asp) box polypeptide 20 // --- // 1000   | DDX20      | Cluster0005 |
| 14934438 | ENSECAT000000011504 // DDX21 // DEAD (Asp-Glu-Ala-Asp) box helicase 21 // --- // 1000726   | DDX21      | Cluster0005 |
| 14985975 | ENSECAT000000019747 // DDX46 // DEAD (Asp-Glu-Ala-Asp) box polypeptide 46 // --- // 1000   | DDX46      | Cluster0005 |
| 14937368 | XM_001497645 // DENND4A // DENN/MADD domain containing 4A // --- // 100053090 // XM_00     | DENND4A    | Cluster0005 |
| 15086553 | XM_001493858 // DENND4B // DENN/MADD domain containing 4B // --- // 100062197 // ENSECA    | DENND4B    | Cluster0005 |
| 14982567 | ENSECAT000000023229 // DIAPH1 // diaphanous homolog 1 (Drosophila) // --- // 100072186 //  | DIAPH1     | Cluster0005 |
| 15005384 | XM_001495217 // DIS3 // DIS3 mitotic control homolog (S. cerevisiae) // --- // 10005193    | DIS3       | Cluster0005 |
| 15076761 | XM_001491576 // DLD // dihydrolipoamide dehydrogenase // --- // 100050920 // ENSECAT00     | DLD        | Cluster0005 |
| 14986452 | XM_003362834 // DMXL1 // Dmx-like 1 // --- // 100064119 // XM_001504549 // DMXL1 // Dm     | DMXL1      | Cluster0005 |
| 14943377 | XM_001503793 // DNAJB12 // DnaJ (Hsp40) homolog, subfamily B, member 12 // --- // 10006    | DNAJB12    | Cluster0005 |
| 14937408 | XM_003363658 // DPP8 // dipeptidyl-peptidase 8 // --- // 100053245 // XM_001497856 //      | DPP8       | Cluster0005 |
| 15121755 | XM_001491535 // DPY19L4 // dpy-19-like 4 (C. elegans) // --- // 100058629 // ENSECAT00     | DPY19L4    | Cluster0005 |
| 15089917 | ENSECAT000000019777 // EDEM3 // ER degradation enhancer, mannosidase alpha-like 3 // ---   | EDEM3      | Cluster0005 |
| 15113623 | XM_001496800 // EIF4ENIF1 // eukaryotic translation initiation factor 4E nuclear import    | EIF4ENIF1  | Cluster0005 |
| 15089102 | ENSECAT000000006690 // ELK4 // ELK4, ETS-domain protein (SRF accessory protein 1) // ---   | ELK4       | Cluster0005 |
| 15040597 | XM_001503431 // ELMO2 // engulfment and cell motility 2 // --- // 100056774 // ENSECAT     | ELMO2      | Cluster0005 |
| 15035126 | ENSECAT000000005942 // ERBB2IP // erbB2 interacting protein // --- // 100057128            | ERBB2IP    | Cluster0005 |
| 15025388 | XM_001500342 // ETFDH // electron-transferring-flavoprotein dehydrogenase // --- // 100    | ETFDH      | Cluster0005 |
| 15096308 | ENSECAT000000007430 // ETNK1 // ethanolamine kinase 1 // --- // 100068424 // XM_0019162    | ETNK1      | Cluster0005 |
| 15083433 | XM_001504629 // EZH2 // enhancer of zeste homolog 2 (Drosophila) // --- // 100051290 //    | EZH2       | Cluster0005 |

|          |                                                                                                  |              |             |
|----------|--------------------------------------------------------------------------------------------------|--------------|-------------|
| 15036000 | ENSECAT00000018036 // FAM105A // family with sequence similarity 105, member A // --- /          | FAM105A      | Cluster0005 |
| 15133485 | ENSECAT000000020006 // FAM122B // family with sequence similarity 122B // --- // ---             | FAM122B      | Cluster0005 |
| 15036973 | NM_001256937 // FASTKD5 // FAST kinase domains 5 // --- // 100052656 // ENSECAT00000000          | FASTKD5      | Cluster0005 |
| 15005446 | XM_001488408 // FBXL3 // F-box and leucine-rich repeat protein 3 // --- // 100052811 //          | FBXL3        | Cluster0005 |
| 14989752 | XM_001498271 // FBXO11 // F-box protein 11 // --- // 100053097 // ENSECAT00000010973 /           | FBXO11       | Cluster0005 |
| 14985373 | XM_001503809 // FBXO38 // F-box protein 38 // --- // 100060728 // ENSECAT00000017183 /           | FBXO38       | Cluster0005 |
| 15029183 | NM_001160296 // FBXO9 // F-box protein 9 // --- // 100069351 // ENSECAT00000007724 //            | FBXO9        | Cluster0005 |
| 14946129 | XM_001496225 // FEM1B // fem-1 homolog b (C. elegans) // --- // 100052688 // ENSECAT00           | FEM1B        | Cluster0005 |
| 14990202 | ENSECAT00000010650 // FEZ2 // fasciculation and elongation protein zeta 2 (zygin II) //          | FEZ2         | Cluster0005 |
| 15072966 | XM_001492655 // FH // fumarate hydratase // --- // 100060381 // ENSECAT00000022289 //            | FH           | Cluster0005 |
| 15071572 | ENSECAT00000020783 // FIP1L1 // FIP1 like 1 (S. cerevisiae) // --- // 100060154 // XM_           | FIP1L1       | Cluster0005 |
| 15090126 | ENSECAT00000019051 // FLVCR1 // feline leukemia virus subgroup C cellular receptor 1 //          | FLVCR1       | Cluster0005 |
| 15100225 | ENSECAT000000021556 // FOXJ2 // forkhead box J2 // --- // 100053321 // XM_001498727 //           | FOXJ2        | Cluster0005 |
| 15016599 | XM_001503156 // FOXJ3 // forkhead box J3 // --- // 100053693 // ENSECAT00000009015 //            | FOXJ3        | Cluster0005 |
| 14993184 | XM_001498254 // FOXN2 // forkhead box N2 // --- // 100053059 // ENSECAT00000008546 //            | FOXN2        | Cluster0005 |
| 15075619 | XM_001497220 // FUCA2 // fucosidase, alpha-L-2, plasma // --- // 100067102 // ENSECAT            | FUCA2        | Cluster0005 |
| 15011788 | XM_001495885 // FXR1 // fragile X mental retardation, autosomal homolog 1 // --- // 100          | FXR1         | Cluster0005 |
| 15053773 | XM_001915095 // GABPA // GABPA // GA binding protein transcription factor, alpha subunit 60kDa / | GABPA        | Cluster0005 |
| 15079991 | ENSECAT00000022085 // GALNT11 // UDP-N-acetyl-alpha-D-galactosamine:polypeptide N-acety          | GALNT11      | Cluster0005 |
| 14942063 | XM_001499117 // GBF1 // golgi brefeldin A resistant guanine nucleotide exchange factor           | GBF1         | Cluster0005 |
| 15132659 | ENSECAT00000019883 // GLA // galactosidase, alpha // --- // 100060370 // XM_001492649            | GLA          | Cluster0005 |
| 14944180 | ENSECAT00000007086 // GNPAT // glyceronephosphate O-acyltransferase // --- // 100060758          | GNPAT        | Cluster0005 |
| 14949265 | XM_001490607 // GPI // glucose-6-phosphate isomerase // --- // 100057160 // ENSECAT000           | GPI          | Cluster0005 |
| 15077957 | ENSECAT00000001905 // GPNMB // glycoprotein (transmembrane) nmb // --- // 100067870 //           | GPNMB        | Cluster0005 |
| 15066947 | XM_001489101 // GRSF1 // G-rich RNA sequence binding factor 1 // --- // 100054436 // E           | GRSF1        | Cluster0005 |
| 14964932 | XM_001499857 // HELZ // helicase with zinc finger // --- // 100053580 // ENSECAT000000           | HELZ         | Cluster0005 |
| 15070532 | ENSECAT00000012452 // HERC3 // HECT and RLD domain containing E3 ubiquitin protein liga          | HERC3        | Cluster0005 |
| 15002184 | ENSECAT00000026209 // HLTF // helicase-like transcription factor // --- // 100058775 //          | HLTF         | Cluster0005 |
| 15004670 | NM_001081835 // HMGB1 // high mobility group box 1 // --- // 100033873 // AB275457 //            | HMGB1        | Cluster0005 |
| 15017855 | XM_001501425 // HNRNPR // heterogeneous nuclear ribonucleoprotein R // --- // 100071619          | HNRNPR       | Cluster0005 |
| 15056743 | XM_001488824 // HOOK3 // hook homolog 3 (Drosophila) // --- // 100053799 // ENSECAT000           | HOOK3        | Cluster0005 |
| 15048217 | NM_001163955 // HSPA9AA1 // heat shock protein 90kDa alpha (cytosolic), class A member           | HSPA9AA1     | Cluster0005 |
| 14986056 | XM_001918224 // HSPA4 // heat shock 70kDa protein 4 // --- // 100072809 // ENSECAT0000           | HSPA4        | Cluster0005 |
| 14982743 | NM_001163884 // HSPA9 // heat shock 70kDa protein 9 (mortalin) // --- // 100034032 //            | HSPA9        | Cluster0005 |
| 15073290 | XM_001488053 // IARS2 // isoleucyl-tRNA synthetase 2, mitochondrial // --- // 100049915          | IARS2        | Cluster0005 |
| 15011383 | ENSECAT00000012896 // IDH1 // isocitrate dehydrogenase 1 (NADP+), soluble // --- // 100          | IDH1         | Cluster0005 |
| 15053877 | XM_001498235 // IFNAR2 // interferon (alpha, beta and omega) receptor 2 // --- // 10005          | IFNAR2       | Cluster0005 |
| 15107665 | XM_001917959 // IPO7 // importin 7 // --- // 100055677 // ENSECAT00000017394 // IPO7 /           | IPO7         | Cluster0005 |
| 15056454 | ENSECAT000000007884 // IRF2 // interferon regulatory factor 2 // --- // 100050990 // XM          | IRF2         | Cluster0005 |
| 15037475 | XM_001916721 // ITCH // itchy E3 ubiquitin protein ligase // --- // 100069340 // ENSEC           | ITCH         | Cluster0005 |
| 15001521 | XM_001493724 // KAT2B // K(lysine) acetyltransferase 2B // --- // 100061976 // ENSECAT           | KAT2B        | Cluster0005 |
| 14971361 | XM_001497095 // KDM2A // lysine (K)-specific demethylase 2A // --- // 100052955 // ENS           | KDM2A        | Cluster0005 |
| 15021948 | XM_001498191 // KDM4A // lysine (K)-specific demethylase 4A // --- // 100053154 // ENS           | KDM4A        | Cluster0005 |
| 15096432 | XM_001916399 // KLHDC5 // kelch domain containing 5 // --- // 100069196 // ENSECAT0000           | KLHDC5       | Cluster0005 |
| 15011849 | ENSECAT00000022513 // KLHL24 // kelch-like 24 (Drosophila) // --- // 100058815 // XM_0           | KLHL24       | Cluster0005 |
| 14993161 | ENSECAT00000022186 // KLRAQ1 // protein phosphatase 1, regulatory subunit 21 // --- //           | KLRAQ1       | Cluster0005 |
| 15098365 | ENSECAT00000009629 // LANCL1 // LanC lantibiotic synthetase component C-like 1 (bacteri          | LANCL1       | Cluster0005 |
| 15077192 | ENSECAT00000024482 // LANCL2 // LanC lantibiotic synthetase component C-like 2 (bacteri          | LANCL2       | Cluster0005 |
| 14938147 | XM_001501499 // LEO1 // Leo1, Paf1/RNA polymerase II complex component, homolog (S. cer          | LEO1         | Cluster0005 |
| 15032341 | XM_001503388 // LMBRD1 // LMBR1 domain containing 1 // --- // 100057167 // ENSECAT0000           | LMBRD1       | Cluster0005 |
| 15033756 | ENSECAT000000021269 // LMBRD2 // LMBR1 domain containing 2 // --- // 100067733 // XM_00          | LMBRD2       | Cluster0005 |
| 14977954 | ENSECAT00000020961 // LMTK2 // lemur tyrosine kinase 2 // --- // 100629931                       | LMTK2        | Cluster0005 |
| 15111401 | ENSECAT00000015919 // LOC100049927 // ester hydrolase C11orf54-like // --- // 100049927          | LOC100049927 | Cluster0005 |
| 15048157 | ENSECAT00000001245 // LOC100049970 // histone-lysine N-methyltransferase setd3-like //           | LOC100049970 | Cluster0005 |

|          |                                                                                          |              |             |
|----------|------------------------------------------------------------------------------------------|--------------|-------------|
| 14935068 | XM_003363640 // LOC100050002 // heterogeneous nuclear ribonucleoprotein F-like // --- /  | LOC100050002 | Cluster0005 |
| 14936362 | XM_001488965 // LOC100050003 // leucine-rich repeat-containing protein 28-like // --- /  | LOC100050003 | Cluster0005 |
| 15089720 | ENSECAT00000015126 // LOC100050024 // latexin-like // --- // 100050024 /// XM_001489649  | LOC100050024 | Cluster0005 |
| 14969557 | ENSECAT00000010831 // LOC100050075 // estradiol 17-beta-dehydrogenase 12-like // --- //  | LOC100050075 | Cluster0005 |
| 15066901 | XM_001488484 // LOC100050172 // mitochondrial inner membrane protein COX18-like // ---   | LOC100050172 | Cluster0005 |
| 14994794 | XM_001488818 // LOC100050214 // pre-mRNA-splicing factor ISY1 homolog // --- // 1000502  | LOC100050214 | Cluster0005 |
| 15009234 | ENSECAT00000025356 // LOC100050291 // ADP-ribosylation factor-like protein 5A-like // -  | LOC100050291 | Cluster0005 |
| 15118233 | XM_001489039 // LOC100050323 // gatC-like protein-like // --- // 100050323 /// ENSECAT0  | LOC100050323 | Cluster0005 |
| 15003753 | XM_001489318 // LOC100050355 // ubiquitin carboxyl-terminal hydrolase isozyme L3-like // | LOC100050355 | Cluster0005 |
| 15033044 | ENSECAT00000003354 // LOC100050363 // small glutamine-rich tetratricopeptide repeat-con  | LOC100050363 | Cluster0005 |
| 15038557 | XM_001490026 // LOC100050441 // mRNA export factor-like // --- // 100050441 /// ENSECAT  | LOC100050441 | Cluster0005 |
| 14976768 | XM_001489539 // LOC100050501 // limkain-b1-like // --- // 100050501 /// ENSECAT00000014  | LOC100050501 | Cluster0005 |
| 15076678 | ENSECAT00000021120 // LOC100050532 // phosphatidylinositol-4,5-bisphosphate 3-kinase ca  | LOC100050532 | Cluster0005 |
| 14992694 | XM_001490819 // LOC100050657 // annexin A4-like // --- // 100050657 /// ENSECAT00000013  | LOC100050657 | Cluster0005 |
| 14988058 | XM_001490447 // LOC100050737 // MIT domain-containing protein 1-like // --- // 10005073  | LOC100050737 | Cluster0005 |
| 15076724 | ENSECAT00000018378 // LOC100050769 // b-cell receptor-associated protein 29-like // ---  | LOC100050769 | Cluster0005 |
| 15116739 | ENSECAT00000008044 // LOC100050782 // lisH domain and HEAT repeat-containing protein KI  | LOC100050782 | Cluster0005 |
| 15021547 | XM_001490954 // LOC100050901 // transcription factor BTF3 homolog 4-like // --- // 1000  | LOC100050901 | Cluster0005 |
| 15118305 | ENSECAT00000026473 // LOC100051008 // phosphatidylethanolamine-binding protein 1-like /  | LOC100051008 | Cluster0005 |
| 15005169 | ENSECAT00000009370 // LOC100051117 // uncharacterized protein KIAA1704-like // --- // 1  | LOC100051117 | Cluster0005 |
| 15029718 | XM_001490955 // LOC100051123 // adenosine 3 -phospho 5 -phosphosulfate transporter 2-li  | LOC100051123 | Cluster0005 |
| 15058105 | ENSECAT000000020243 // LOC100051280 // uncharacterized protein C12orf29 homolog // --- / | LOC100051280 | Cluster0005 |
| 15038818 | XM_001493585 // LOC100051346 // protein C20orf11 homolog // --- // 100051346 /// ENSECA  | LOC100051346 | Cluster0005 |
| 15044550 | XM_001497650 // LOC100051348 // protein phosphatase 1A-like // --- // 100051348 /// XM_  | LOC100051348 | Cluster0005 |
| 14935485 | ENSECAT000000023662 // LOC100051461 // poly(ADP-ribose) glycohydrolase-like // --- // 10 | LOC100051461 | Cluster0005 |
| 15102585 | ENSECAT00000009591 // LOC100051590 // dnaJ homolog subfamily C member 14-like // --- //  | LOC100051590 | Cluster0005 |
| 15127207 | XM_001492157 // LOC100051597 // pyruvate dehydrogenase E1 component subunit alpha, soma  | LOC100051597 | Cluster0005 |
| 15084166 | ENSECAT000000023021 // LOC100051645 // TIP41-like protein-like // --- // 100051645 /// X | LOC100051645 | Cluster0005 |
| 15084893 | ENSECAT00000000944 // LOC100051658 // n-acetylneuraminate lyase-like // --- // 10005165  | LOC100051658 | Cluster0005 |
| 15061511 | ENSECAT000000024700 // LOC100051710 // uncharacterized protein KIAA0930-like // --- // 1 | LOC100051710 | Cluster0005 |
| 14941009 | ENSECAT000000026311 // LOC100051737 // serine/threonine-protein phosphatase 2A 55 kDa re | LOC100051737 | Cluster0005 |
| 14972487 | ENSECAT000000015176 // LOC100051744 // mitochondrial carrier homolog 2-like // --- // 10 | LOC100051744 | Cluster0005 |
| 15075976 | ENSECAT000000017774 // LOC100051773 // programmed cell death protein 2-like // --- // 10 | LOC100051773 | Cluster0005 |
| 15100959 | ENSECAT000000020767 // LOC100051785 // GTPase KRas-like // --- // 100051785 /// XM_00149 | LOC100051785 | Cluster0005 |
| 15041992 | XM_001493301 // LOC100051824 // melanoma antigen recognized by T-cells 1-like // --- //  | LOC100051824 | Cluster0005 |
| 15027396 | ENSECAT000000019450 // LOC100051847 // protein phosphatase 1 regulatory subunit 11-like  | LOC100051847 | Cluster0005 |
| 15121697 | ENSECAT00000007598 // LOC100051849 // protein FAM92A1-like // --- // 100051849 /// XM_0  | LOC100051849 | Cluster0005 |
| 15116929 | ENSECAT000000017749 // LOC100052148 // TIM21-like protein, mitochondrial-like // --- //  | LOC100052148 | Cluster0005 |
| 15089758 | ENSECAT000000025442 // LOC100052650 // importin subunit alpha-4-like // --- // 100052650 | LOC100052650 | Cluster0005 |
| 15102850 | ENSECAT000000015933 // LOC100052730 // nascent polypeptide-associated complex subunit al | LOC100052730 | Cluster0005 |
| 14963768 | XM_001489880 // LOC100052790 // folliculin-like // --- // 100052790 /// ENSECAT000000022 | LOC100052790 | Cluster0005 |
| 15121321 | ENSECAT000000013628 // LOC100052888 // cholesterol 7-alpha-monooxygenase-like // --- //  | LOC100052888 | Cluster0005 |
| 14937289 | ENSECAT000000013887 // LOC100052900 // alpha- and gamma-adaptin-binding protein p34-like | LOC100052900 | Cluster0005 |
| 15093263 | XM_001498098 // LOC100053123 // dnaJ homolog subfamily B member 4-like // --- // 100053  | LOC100053123 | Cluster0005 |
| 14937396 | ENSECAT000000020284 // LOC100053141 // UPF0464 protein C15orf44 homolog // --- // 100053 | LOC100053141 | Cluster0005 |
| 15044990 | ENSECAT000000021762 // LOC100053161 // zinc transporter ZIP9-like // --- // 100053161 // | LOC100053161 | Cluster0005 |
| 15047937 | XM_001497437 // LOC100053265 // legumain-like // --- // 100053265 /// ENSECAT00000001104 | LOC100053265 | Cluster0005 |
| 15010072 | XM_001500017 // LOC100053400 // protein lunapark-like // --- // 100053400 /// ENSECAT00  | LOC100053400 | Cluster0005 |
| 15121630 | ENSECAT000000023730 // LOC100053423 // 2,4-dienoyl-CoA reductase, mitochondrial-like //  | LOC100053423 | Cluster0005 |
| 15081895 | XM_001916123 // LOC100053610 // hyccin-like // --- // 100053610 /// ENSECAT00000025313   | LOC100053610 | Cluster0005 |
| 15064836 | ENSECAT000000014815 // LOC100053856 // nuclear factor of activated T-cells, cytoplasmic  | LOC100053856 | Cluster0005 |
| 14976793 | XM_001488859 // LOC100053887 // pyridoxal-dependent decarboxylase domain-containing pro  | LOC100053887 | Cluster0005 |
| 15037305 | XM_001500376 // LOC100053947 // microtubule-associated protein RP/EB family member 1-li  | LOC100053947 | Cluster0005 |
| 14990106 | ENSECAT000000020438 // LOC100054231 // CCAAT/enhancer-binding protein zeta-like // --- / | LOC100054231 | Cluster0005 |

|          |                                                                                          |              |             |
|----------|------------------------------------------------------------------------------------------|--------------|-------------|
| 15016748 | XM_001503462 // LOC100054282 // peptidyl-prolyl cis-trans isomerase E-like // --- // 10  | LOC100054282 | Cluster0005 |
| 15133409 | XM_001489008 // LOC100054364 // ras-related protein Rap-2c-like // --- // 100054364 ///  | LOC100054364 | Cluster0005 |
| 15057345 | ENSECAT000000021737 // LOC100054433 // acid ceramidase-like // --- // 100054433 /// XM_0 | LOC100054433 | Cluster0005 |
| 15086960 | XM_001917235 // LOC100054493 // acidic leucine-rich nuclear phosphoprotein 32 family me  | LOC100054493 | Cluster0005 |
| 15074186 | XM_001489714 // LOC100054506 // presenilin-2-like // --- // 100054506 /// ENSECAT000000  | LOC100054506 | Cluster0005 |
| 15130093 | ENSECAT00000009431 // LOC100054669 // HIV Tat-specific factor 1 homolog // --- // 10005  | LOC100054669 | Cluster0005 |
| 15115573 | XM_001488009 // LOC100054712 // twisted gastrulation protein homolog 1-like // --- // 1  | LOC100054712 | Cluster0005 |
| 15086948 | XM_001917162 // LOC100054765 // induced myeloid leukemia cell differentiation protein M  | LOC100054765 | Cluster0005 |
| 14958029 | ENSECAT000000020648 // LOC100054966 // NAD-dependent deacetylase sirtuin-7-like // --- / | LOC100054966 | Cluster0005 |
| 15008657 | XM_001489408 // LOC100055077 // translin-like // --- // 100055077 /// ENSECAT0000001680  | LOC100055077 | Cluster0005 |
| 15089112 | XM_001489449 // LOC100055118 // nuclear ubiquitous casein and cyclin-dependent kinases   | LOC100055118 | Cluster0005 |
| 15051434 | ENSECAT000000005642 // LOC100055153 // exosome complex component RRP40-like // --- // 10 | LOC100055153 | Cluster0005 |
| 14946695 | ENSECAT000000023924 // LOC100055314 // AP-4 complex subunit epsilon-1-like // --- // 100 | LOC100055314 | Cluster0005 |
| 15092601 | XM_001488337 // LOC100055424 // zinc transporter 7-like // --- // 100055424 /// ENSECAT  | LOC100055424 | Cluster0005 |
| 15003200 | XM_001488628 // LOC100055495 // chronic lymphocytic leukemia deletion region gene 6 pro  | LOC100055495 | Cluster0005 |
| 15122978 | XM_001914906 // LOC100055514 // copine-3-like // --- // 100055514 /// ENSECAT0000002368  | LOC100055514 | Cluster0005 |
| 14946749 | ENSECAT000000012768 // LOC100055565 // DTW domain-containing protein 1-like // --- // 10 | LOC100055565 | Cluster0005 |
| 14997471 | XM_001489950 // LOC100056043 // upstream-binding protein 1-like // --- // 100056043 ///  | LOC100056043 | Cluster0005 |
| 15017269 | XM_001503862 // LOC100056044 // protein tyrosine phosphatase type IVA 2-like // --- //   | LOC100056044 | Cluster0005 |
| 15043180 | ENSECAT000000027014 // LOC100056086 // structural maintenance of chromosomes protein 5-1 | LOC100056086 | Cluster0005 |
| 15038589 | ENSECAT000000013401 // LOC100056212 // ras-related protein Rab-22A-like // --- // 100056 | LOC100056212 | Cluster0005 |
| 15027429 | ENSECAT000000025949 // LOC100056231 // patr class I histocompatibility antigen, A-126 al | LOC100056231 | Cluster0005 |
| 15089258 | ENSECAT00000009993 // LOC100056344 // transcriptional adapter 1-like // --- // 10005634  | LOC100056344 | Cluster0005 |
| 15068189 | XM_001501365 // LOC100056426 // MORF4 family-associated protein 1-like // --- // 100056  | LOC100056426 | Cluster0005 |
| 15074418 | ENSECAT000000010619 // LOC100056607 // RRP15-like protein-like // --- // 100056607 /// X | LOC100056607 | Cluster0005 |
| 15063527 | ENSECAT000000008224 // LOC100056689 // optineurin-like // --- // 100056689               | LOC100056689 | Cluster0005 |
| 15091278 | XM_001496771 // LOC100056899 // HCLS1-associated protein X-1-like // --- // 100056899 /  | LOC100056899 | Cluster0005 |
| 15120833 | ENSECAT000000024056 // LOC100057100 // sorting nexin-16-like // --- // 100057100 /// XM_ | LOC100057100 | Cluster0005 |
| 14941158 | XM_001490606 // LOC100057158 // BRISC complex subunit Abro1-like // --- // 100057158 //  | LOC100057158 | Cluster0005 |
| 15090303 | ENSECAT000000010143 // LOC100057176 // uncharacterized LOC100057176 // --- // 100057176  | LOC100057176 | Cluster0005 |
| 15115626 | ENSECAT000000007438 // LOC100057183 // uncharacterized protein C18orf19 homolog // --- / | LOC100057183 | Cluster0005 |
| 15108085 | ENSECAT000000011744 // LOC100057256 // transmembrane protein 86A-like // --- // 10005725 | LOC100057256 | Cluster0005 |
| 14980277 | XM_001492888 // LOC100057523 // phosphomannomutase 2-like // --- // 100057523 /// ENSEC  | LOC100057523 | Cluster0005 |
| 15122420 | XM_001497901 // LOC100057539 // protein FAM91A1-like // --- // 100057539 /// ENSECAT000  | LOC100057539 | Cluster0005 |
| 15095452 | XM_001490880 // LOC100057576 // tubby-related protein 3-like // --- // 100057576 /// EN  | LOC100057576 | Cluster0005 |
| 15099390 | XM_001500579 // LOC100057698 // NADH dehydrogenase [ubiquinone] 1 alpha subcomplex subu  | LOC100057698 | Cluster0005 |
| 15086135 | XM_001500077 // LOC100057746 // protein SMG5-like // --- // 100057746 /// ENSECAT000000  | LOC100057746 | Cluster0005 |
| 15129146 | ENSECAT000000001525 // LOC100057749 // armadillo repeat-containing X-linked protein 3-li | LOC100057749 | Cluster0005 |
| 15073111 | XM_001491159 // LOC100058044 // Golgi resident protein GCP60-like // --- // 100058044 /  | LOC100058044 | Cluster0005 |
| 15066732 | XM_001491232 // LOC100058151 // lysosome membrane protein 2-like // --- // 100058151 //  | LOC100058151 | Cluster0005 |
| 14969844 | ENSECAT000000014195 // LOC100058223 // NADH dehydrogenase [ubiquinone] iron-sulfur prote | LOC100058223 | Cluster0005 |
| 15011717 | XM_001495170 // LOC100058230 // mitofusin-1-like // --- // 100058230 /// ENSECAT00000002 | LOC100058230 | Cluster0005 |
| 15090642 | ENSECAT000000020352 // LOC100058382 // astrocytic phosphoprotein PEA-15-like // --- // 1 | LOC100058382 | Cluster0005 |
| 15057207 | XM_001495978 // LOC100058499 // tankyrase-1-like // --- // 100058499 /// ENSECAT0000000  | LOC100058499 | Cluster0005 |
| 15133068 | XM_001914996 // LOC100058559 // regulator of nonsense transcripts 3B-like // --- // 100  | LOC100058559 | Cluster0005 |
| 15056472 | XM_001492050 // LOC100058620 // RWD domain-containing protein 4-like // --- // 10005862  | LOC100058620 | Cluster0005 |
| 14932770 | ENSECAT000000013781 // LOC100058684 // uncharacterized protein C10orf46-like // --- // 1 | LOC100058684 | Cluster0005 |
| 15133080 | XM_001914804 // LOC100058761 // NF-kappa-B-activating protein-like // --- // 100058761   | LOC100058761 | Cluster0005 |
| 15011908 | ENSECAT000000020156 // LOC100058922 // translation initiation factor eIF-2B subunit epsi | LOC100058922 | Cluster0005 |
| 15133038 | XM_001914739 // LOC100059026 // UPF0428 protein CXorf56 homolog // --- // 100059026 ///  | LOC100059026 | Cluster0005 |
| 15026608 | XM_001489220 // LOC100059043 // serine/threonine-protein kinase PRP4 homolog // --- //   | LOC100059043 | Cluster0005 |
| 14991570 | ENSECAT000000012398 // LOC100059155 // UPF0760 protein C2orf29-like // --- // 100059155  | LOC100059155 | Cluster0005 |
| 15098242 | ENSECAT000000008498 // LOC100059287 // nuclear pore complex protein Nup107-like // --- / | LOC100059287 | Cluster0005 |
| 15024898 | ENSECAT000000012264 // LOC100059300 // BTB/POZ domain-containing protein KCTD9-like // - | LOC100059300 | Cluster0005 |

|          |                                                                                           |              |             |
|----------|-------------------------------------------------------------------------------------------|--------------|-------------|
| 15113901 | XM_001499699 // LOC100059322 // phosphatidylinositol transfer protein beta isoform-like   | LOC100059322 | Cluster0005 |
| 14995858 | XM_001915031 // LOC100059386 // actin-related protein 8-like // --- // 100059386 // EN    | LOC100059386 | Cluster0005 |
| 15133943 | XM_001915515 // LOC100059443 // deoxyribonuclease-1-like 1-like // --- // 100059443 //    | LOC100059443 | Cluster0005 |
| 15071507 | XM_003364683 // LOC100059506 // transmembrane protein 165-like // --- // 100059506 //     | LOC100059506 | Cluster0005 |
| 14997645 | XM_001492115 // LOC100059572 // DNA topoisomerase 2-beta-like // --- // 100059572 // E    | LOC100059572 | Cluster0005 |
| 15041965 | XM_001492144 // LOC100059612 // protein RIC1 homolog // --- // 100059612 // ENSECAT000    | LOC100059612 | Cluster0005 |
| 15005180 | ENSECAT00000019998 // LOC100059776 // UPF0124 protein C13orf31-like // --- // 100059776   | LOC100059776 | Cluster0005 |
| 14984997 | ENSECAT000000020573 // LOC100059807 // ubiquitin-like domain-containing CTD phosphatase   | LOC100059807 | Cluster0005 |
| 15091455 | ENSECAT00000001614 // LOC100059977 // sorting nexin-27-like // --- // 100059977 // XM_    | LOC100059977 | Cluster0005 |
| 14982038 | XM_001917506 // LOC100059991 // protein FAM114A2-like // --- // 100059991 // ENSECAT00    | LOC100059991 | Cluster0005 |
| 14936691 | ENSECAT00000016292 // LOC100060114 // isocitrate dehydrogenase [NAD] subunit alpha, mit   | LOC100060114 | Cluster0005 |
| 14936702 | ENSECAT000000025523 // LOC100060143 // dnaJ homolog subfamily A member 4-like // --- //   | LOC100060143 | Cluster0005 |
| 14972114 | XM_001492591 // LOC100060270 // rhombotin-2-like // --- // 100060270 // ENSECAT0000000    | LOC100060270 | Cluster0005 |
| 14987838 | XM_001492722 // LOC100060477 // septin-10-like // --- // 100060477 // ENSECAT000000155    | LOC100060477 | Cluster0005 |
| 15012649 | XM_001501592 // LOC100060529 // zinc finger protein 148-like // --- // 100060529 // EN    | LOC100060529 | Cluster0005 |
| 14969419 | XM_001914718 // LOC100060647 // catalase-like // --- // 100060647 // ENSECAT00000002124   | LOC100060647 | Cluster0005 |
| 15012829 | XM_001502137 // LOC100060695 // coiled-coil domain-containing protein 58-like // --- //   | LOC100060695 | Cluster0005 |
| 14945692 | XM_001917992 // LOC100060833 // electron transfer flavoprotein subunit alpha, mitochond   | LOC100060833 | Cluster0005 |
| 15115022 | XM_001492985 // LOC100060853 // n-lysine methyltransferase SETD8-like // --- // 1000608   | LOC100060853 | Cluster0005 |
| 14985439 | XM_003362796 // LOC100061029 // transcription elongation regulator 1-like // --- // 100   | LOC100061029 | Cluster0005 |
| 15003877 | XM_003363200 // LOC100061123 // ubiquitin-associated domain-containing protein 2-like /   | LOC100061123 | Cluster0005 |
| 15015046 | XM_001502844 // LOC100061223 // v-type proton ATPase catalytic subunit A-like // --- //   | LOC100061223 | Cluster0005 |
| 15029666 | XM_001493337 // LOC100061378 // translocon-associated protein subunit alpha-like // ---   | LOC100061378 | Cluster0005 |
| 14974702 | ENSECAT000000000171 // LOC100061601 // probable palmitoyltransferase ZDHHC4-like // ---   | LOC100061601 | Cluster0005 |
| 15106713 | ENSECAT000000014660 // LOC100061628 // coiled-coil domain-containing protein 90B, mitoch  | LOC100061628 | Cluster0005 |
| 14979519 | XM_001493576 // LOC100061739 // leucine carboxyl methyltransferase 1-like // --- // 100   | LOC100061739 | Cluster0005 |
| 15064226 | ENSECAT000000011996 // LOC100062120 // homocysteine-responsive endoplasmic reticulum-res  | LOC100062120 | Cluster0005 |
| 15086535 | ENSECAT0000000022095 // LOC100062274 // zinc transporter ZIPI-like // --- // 100062274 // | LOC100062274 | Cluster0005 |
| 14974659 | XM_001493987 // LOC100062410 // vacuolar fusion protein CCZ1 homolog // --- // 10006241   | LOC100062410 | Cluster0005 |
| 14982994 | ENSECAT000000013217 // LOC100062974 // voltage-dependent anion-selective channel protein  | LOC100062974 | Cluster0005 |
| 15047852 | XM_001494497 // LOC100063171 // serine/threonine-protein phosphatase 4 regulatory subun   | LOC100063171 | Cluster0005 |
| 14998265 | XM_001495342 // LOC100064018 // 28S ribosomal protein S22, mitochondrial-like // --- //   | LOC100064018 | Cluster0005 |
| 15096269 | XM_001502130 // LOC100064206 // pyridine nucleotide-disulfide oxidoreductase domain-con   | LOC100064206 | Cluster0005 |
| 14983413 | ENSECAT000000017203 // LOC100064254 // geranylgeranyl transferase type-1 subunit beta-li  | LOC100064254 | Cluster0005 |
| 15122229 | ENSECAT000000009942 // LOC100064267 // receptor-binding cancer antigen expressed on SiSo  | LOC100064267 | Cluster0005 |
| 15096294 | XM_001917026 // LOC100064384 // n-acylneuraminate cytidyltransferase-like // --- // 1     | LOC100064384 | Cluster0005 |
| 14959726 | XM_001495314 // LOC100064401 // coiled-coil domain-containing protein 43-like // --- //   | LOC100064401 | Cluster0005 |
| 15126186 | ENSECAT000000011610 // LOC100064665 // transmembrane protein 19-like // --- // 100064665  | LOC100064665 | Cluster0005 |
| 14932655 | ENSECAT000000012836 // LOC100064881 // arginyl-tRNA--protein transferase 1-like // --- // | LOC100064881 | Cluster0005 |
| 15071959 | ENSECAT000000009746 // LOC100064893 // phosphoglucomutase-2-like // --- // 100064893 //   | LOC100064893 | Cluster0005 |
| 15036711 | XM_001495797 // LOC100065101 // thioredoxin-related transmembrane protein 4-like // ---   | LOC100065101 | Cluster0005 |
| 14983835 | XM_001504620 // LOC100065122 // centrin-3-like // --- // 100065122 // ENSECAT0000000266   | LOC100065122 | Cluster0005 |
| 15106967 | ENSECAT000000007395 // LOC100065199 // potassium voltage-gated channel subfamily E membe  | LOC100065199 | Cluster0005 |
| 15069097 | ENSECAT000000021919 // LOC100065490 // cytoplasmic dynein 1 light intermediate chain 2-1  | LOC100065490 | Cluster0005 |
| 15108855 | ENSECAT000000000324 // LOC100065544 // general transcription factor IIF subunit 1-like /  | LOC100065544 | Cluster0005 |
| 15107050 | ENSECAT000000024371 // LOC100065545 // ras-related protein Rab-6A-like // --- // 1000655  | LOC100065545 | Cluster0005 |
| 14940734 | XM_001496247 // LOC100065740 // alpha-1,6-mannosyl-glycoprotein 2-beta-N-acetylglucosam   | LOC100065740 | Cluster0005 |
| 15085585 | ENSECAT000000014997 // LOC100065940 // succinate dehydrogenase cytochrome b560 subunit,   | LOC100065940 | Cluster0005 |
| 15026919 | ENSECAT000000016162 // LOC100066056 // protein FAM8A1-like // --- // 100066056 // XM_00   | LOC100066056 | Cluster0005 |
| 14943787 | ENSECAT000000005161 // LOC100066087 // ras-related protein Rab-4A-like // --- // 1000660  | LOC100066087 | Cluster0005 |
| 15085551 | XM_001503803 // LOC100066089 // NADH dehydrogenase [ubiquinone] iron-sulfur protein 2,    | LOC100066089 | Cluster0005 |
| 15048672 | XM_001496562 // LOC100066214 // DDB1- and CUL4-associated factor 10-like // --- // 1000   | LOC100066214 | Cluster0005 |
| 15029922 | XM_001496593 // LOC100066265 // protein DEK-like // --- // 100066265 // ENSECAT0000001    | LOC100066265 | Cluster0005 |
| 15079178 | XM_001496641 // LOC100066339 // putative RNA-binding protein Luc7-like 2-like // --- //   | LOC100066339 | Cluster0005 |

|          |                                                                                           |              |             |
|----------|-------------------------------------------------------------------------------------------|--------------|-------------|
| 14956950 | XM_001503983 // LOC100066515 // sorting nexin-3-like // --- // 100066515 /// ENSECAT000   | LOC100066515 | Cluster0005 |
| 14940797 | XM_001916196 // LOC100066874 // thioredoxin-related transmembrane protein 1-like // ---   | LOC100066874 | Cluster0005 |
| 15058538 | ENSECAT00000020229 // LOC100066907 // cholinephosphotransferase 1-like // --- // 100066   | LOC100066907 | Cluster0005 |
| 15050039 | XM_001500465 // LOC100066929 // protein SET-like // --- // 100066929 /// ENSECAT0000000   | LOC100066929 | Cluster0005 |
| 15028684 | ENSECAT000000003760 // LOC100067007 // 60S ribosomal protein L7-like 1-like // --- // 10  | LOC100067007 | Cluster0005 |
| 14992134 | ENSECAT000000022445 // LOC100067047 // pentatricopeptide repeat-containing protein 3, mi  | LOC100067047 | Cluster0005 |
| 15096123 | XM_001497503 // LOC100067460 // putative deoxyribose-phosphate aldolase-like // --- //    | LOC100067460 | Cluster0005 |
| 14988770 | XM_001497585 // LOC100067584 // succinyl-CoA ligase [GDP-forming] subunit alpha, mitoch   | LOC100067584 | Cluster0005 |
| 15030027 | ENSECAT000000015105 // LOC100067631 // tyrosyl-DNA phosphodiesterase 2-like // --- // 10  | LOC100067631 | Cluster0005 |
| 14975584 | ENSECAT000000025328 // LOC100067691 // H(+)/Cl(-) exchange transporter 7-like // --- //   | LOC100067691 | Cluster0005 |
| 14953331 | ENSECAT000000020831 // LOC100067729 // TATA box-binding protein-like protein 1-like // -  | LOC100067729 | Cluster0005 |
| 15058669 | XM_001497703 // LOC100067735 // host cell factor 2-like // --- // 100067735 /// ENSECAT   | LOC100067735 | Cluster0005 |
| 14935854 | XM_001498076 // LOC100068202 // UPF0235 protein C15orf40 homolog // --- // 100068202 //   | LOC100068202 | Cluster0005 |
| 14975063 | XM_001505046 // LOC100068657 // COP9 signalosome complex subunit 6-like // --- // 10006   | LOC100068657 | Cluster0005 |
| 15088803 | ENSECAT000000015423 // LOC100069110 // uncharacterized LOC100069110 // --- // 100069110   | LOC100069110 | Cluster0005 |
| 14938044 | ENSECAT000000014788 // LOC100069498 // uncharacterized protein KIAA1370-like // --- // 1  | LOC100069498 | Cluster0005 |
| 15052962 | XM_001499306 // LOC100069565 // uridine-cytidine kinase 1-like // --- // 100069565 ///    | LOC100069565 | Cluster0005 |
| 15109512 | ENSECAT000000008687 // LOC100069736 // protein NPAT-like // --- // 100069736 /// XM_0019  | LOC100069736 | Cluster0005 |
| 14956253 | XM_001503661 // LOC100069784 // protein FAM46A-like // --- // 100069784 /// ENSECAT0000   | LOC100069784 | Cluster0005 |
| 14938217 | ENSECAT000000008737 // LOC100069832 // signal peptide peptidase-like 2A-like // --- // 1  | LOC100069832 | Cluster0005 |
| 15068182 | XM_001499798 // LOC100070117 // wolframin-like // --- // 100070117 /// ENSECAT0000000137  | LOC100070117 | Cluster0005 |
| 15014621 | ENSECAT000000011003 // LOC100070138 // run domain Beclin-1 interacting and cysteine-rich  | LOC100070138 | Cluster0005 |
| 15059222 | XM_001917207 // LOC100070427 // adenylosuccinate lyase-like // --- // 100070427 /// ENS   | LOC100070427 | Cluster0005 |
| 15012813 | XM_001500297 // LOC100070623 // importin subunit alpha-1-like // --- // 100070623 /// E   | LOC100070623 | Cluster0005 |
| 14938550 | ENSECAT000000001341 // LOC100070629 // spatacsin-like // --- // 100070629                 | LOC100070629 | Cluster0005 |
| 14947085 | ENSECAT000000012136 // LOC100070880 // cyclin-D1-binding protein 1-like // --- // 100070  | LOC100070880 | Cluster0005 |
| 15011044 | XM_001917879 // LOC100070939 // BTB/POZ domain-containing protein KCTD18-like // --- //   | LOC100070939 | Cluster0005 |
| 15061360 | XM_001500736 // LOC100071050 // NADH-cytochrome b5 reductase 3-like // --- // 100071050   | LOC100071050 | Cluster0005 |
| 15040751 | ENSECAT0000000023895 // LOC100071419 // beta-1,4-galactosyltransferase 5-like // --- // 1 | LOC100071419 | Cluster0005 |
| 15038464 | XM_003363892 // LOC100071474 // CCAAT/enhancer-binding protein beta-like // --- // 1000   | LOC100071474 | Cluster0005 |
| 15036193 | ENSECAT000000025728 // LOC100071527 // uncharacterized protein KIAA0947-like // --- // 1  | LOC100071527 | Cluster0005 |
| 15082596 | ENSECAT000000016823 // LOC100071546 // uncharacterized LOC100071546 // --- // 100071546   | LOC100071546 | Cluster0005 |
| 14966974 | XM_001501508 // LOC100071676 // zinc finger protein 830-like // --- // 100071676 /// EN   | LOC100071676 | Cluster0005 |
| 15018160 | XM_001501765 // LOC100071914 // aflatoxin B1 aldehyde reductase member 2-like // --- //   | LOC100071914 | Cluster0005 |
| 14985527 | XM_001502004 // LOC100072138 // NEDD4 family-interacting protein 1-like // --- // 10007   | LOC100072138 | Cluster0005 |
| 14994375 | XM_001502047 // LOC100072175 // ATP-dependent RNA helicase DDX1-like // --- // 10007217   | LOC100072175 | Cluster0005 |
| 15013472 | XM_001917325 // LOC100072274 // mitochondrial import receptor subunit TOM70-like // ---   | LOC100072274 | Cluster0005 |
| 15015391 | ENSECAT0000000026105 // LOC100072293 // TBC1 domain family member 23-like // --- // 10007 | LOC100072293 | Cluster0005 |
| 14952833 | XM_001504039 // LOC100072369 // ribosome production factor 2 homolog // --- // 10007236   | LOC100072369 | Cluster0005 |
| 14985641 | XM_001502291 // LOC100072378 // zinc finger matrin-type protein 2-like // --- // 100072   | LOC100072378 | Cluster0005 |
| 15108310 | ENSECAT000000020331 // LOC100072557 // uncharacterized protein C11orf46 homolog // --- /  | LOC100072557 | Cluster0005 |
| 14943242 | XM_001502612 // LOC100072614 // graves disease carrier protein-like // --- // 100072614   | LOC100072614 | Cluster0005 |
| 15026308 | XM_001502751 // LOC100072722 // AP-1 complex-associated regulatory protein-like // ---    | LOC100072722 | Cluster0005 |
| 14985966 | XM_001502761 // LOC100072729 // thioredoxin domain-containing protein 15-like // --- //   | LOC100072729 | Cluster0005 |
| 14957301 | ENSECAT000000009844 // LOC100072790 // golgi-associated PDZ and coiled-coil motif-contai  | LOC100072790 | Cluster0005 |
| 14991186 | ENSECAT000000005716 // LOC100072837 // 1,2-dihydroxy-3-keto-5-methylthiopentene dioxigen  | LOC100072837 | Cluster0005 |
| 15015545 | XM_001502968 // LOC100072898 // putative methyltransferase NSUN3-like // --- // 1000728   | LOC100072898 | Cluster0005 |
| 14953042 | ENSECAT000000025228 // LOC100072974 // acid sphingomyelinase-like phosphodiesterase 3a-1  | LOC100072974 | Cluster0005 |
| 14983486 | XM_001503567 // LOC100073191 // stAR-related lipid transfer protein 4-like // --- // 10   | LOC100073191 | Cluster0005 |
| 14986817 | ENSECAT000000026323 // LOC100073223 // endoplasmic reticulum aminopeptidase 2-like // --  | LOC100073223 | Cluster0005 |
| 14987439 | ENSECAT000000012513 // LOC100073289 // beta-hexosaminidase subunit beta-like // --- // 1  | LOC100073289 | Cluster0005 |
| 14964443 | XM_001916777 // LOC100146544 // CST complex subunit TEN1-like // --- // 100146544 /// E   | LOC100146544 | Cluster0005 |
| 14975942 | XM_001915497 // LOC100146790 // myc-associated zinc finger protein-like // --- // 10014   | LOC100146790 | Cluster0005 |
| 15090442 | XM_003364970 // LOC100629275 // SLAM family member 9-like // --- // 100629275 /// ENSE    | LOC100629275 | Cluster0005 |



|          |                                                                                          |              |             |
|----------|------------------------------------------------------------------------------------------|--------------|-------------|
| 15068578 | ENSECAT00000009337 // LOC100629296 // UPF0547 protein C16orf87-like // --- // 100629296  | LOC100629296 | Cluster0005 |
| 15097300 | ENSECAT000000021394 // LOC100629527 // transcription factor Sp1-like // --- // 100629527 | LOC100629527 | Cluster0005 |
| 15078126 | ENSECAT000000014353 // LOC100630238 // e3 ubiquitin-protein ligase RNF6-like // --- // 1 | LOC100630238 | Cluster0005 |
| 15032646 | XM_003363819 // LOC100630400 // DET1- and DDB1-associated protein 1-like // --- // 1006  | LOC100630400 | Cluster0005 |
| 15041007 | XM_003363950 // LOC100630568 // ATP synthase subunit epsilon, mitochondrial-like // ---  | LOC100630568 | Cluster0005 |
| 15119372 | ENSECAT000000019060 // LOC100630847 // uncharacterized LOC100630847 // --- // 100630847  | LOC100630847 | Cluster0005 |
| 15063887 | ENSECAT000000024215 // LONP2 // lon peptidase 2, peroxisomal // --- // 100057497 // XM_  | LONP2        | Cluster0005 |
| 15018994 | ENSECAT000000024120 // LRRRC47 // leucine rich repeat containing 47 // --- // 100146297  | LRRRC47      | Cluster0005 |
| 14997384 | XM_001489140 // LRRFIP2 // leucine rich repeat (in FLII) interacting protein 2 // --- /  | LRRFIP2      | Cluster0005 |
| 15014504 | ENSECAT000000019224 // LSG1 // large subunit GTPase 1 homolog (S. cerevisiae) // --- //  | LSG1         | Cluster0005 |
| 15054941 | XM_001915192 // LTN1 // listerin E3 ubiquitin protein ligase 1 // --- // 100065649 //    | LTN1         | Cluster0005 |
| 15091950 | ENSECAT000000021179 // MAN1A2 // mannosidase, alpha, class 1A, member 2 // --- // --- // | MAN1A2       | Cluster0005 |
| 15006261 | ENSECAT000000023172 // MAP3K2 // mitogen-activated protein kinase kinase kinase 2 // --- | MAP3K2       | Cluster0005 |
| 14956629 | XM_001503783 // MAP3K7 // mitogen-activated protein kinase kinase 7 // --- // 10         | MAP3K7       | Cluster0005 |
| 15133517 | ENSECAT000000006633 // MAP7D3 // MAP7 domain containing 3 // --- // ---                  | MAP7D3       | Cluster0005 |
| 15118497 | ENSECAT000000010509 // MAPKAPK5 // mitogen-activated protein kinase-activated protein ki | MAPKAPK5     | Cluster0005 |
| 14985781 | NM_001205261 // MATR3 // matrin 3 // --- // 100062181 // ENSECAT000000013816 // MATR3 /  | MATR3        | Cluster0005 |
| 14966357 | ENSECAT000000024684 // MBTD1 // mbt domain containing 1 // --- // 100070259 // XM_00149  | MBTD1        | Cluster0005 |
| 15127245 | ENSECAT000000000582 // MBTPS2 // membrane-bound transcription factor peptidase, site 2 / | MBTPS2       | Cluster0005 |
| 15123661 | XM_001487951 // MCM4 // minichromosome maintenance complex component 4 // --- // 100051  | MCM4         | Cluster0005 |
| 15116496 | XM_001499374 // ME2 // malic enzyme 2, NAD(+)-dependent, mitochondrial // --- // 100069  | ME2          | Cluster0005 |
| 14957549 | ENSECAT000000026671 // MED23 // mediator complex subunit 23 // --- // 100067556          | MED23        | Cluster0005 |
| 14985124 | ENSECAT000000018975 // MFAP3 // microfibrillar-associated protein 3 // --- // 100071417  | MFAP3        | Cluster0005 |
| 14981370 | ENSECAT000000011626 // MGAT4B // mannosyl (alpha-1,3-)-glycoprotein beta-1,4-N-acetylglu | MGAT4B       | Cluster0005 |
| 15093517 | ENSECAT000000022197 // MIER1 // mesoderm induction early response 1 homolog (Xenopus lae | MIER1        | Cluster0005 |
| 15114871 | ENSECAT000000012727 // MLXIP // MLX interacting protein // --- // 100060001              | MLXIP        | Cluster0005 |
| 15035560 | ENSECAT000000009638 // MRPS30 // mitochondrial ribosomal protein S30 // --- // ---       | MRPS30       | Cluster0005 |
| 15126938 | XM_001488963 // MSL3 // male-specific lethal 3 homolog (Drosophila) // --- // 100054131  | MSL3         | Cluster0005 |
| 15129970 | ENSECAT000000014290 // MST4 // serine/threonine protein kinase MST4 // --- // 100057553  | MST4         | Cluster0005 |
| 15121849 | ENSECAT0000000011528 // MTDH // metadherin // --- // 100059885 // XM_001492316 // MTDH / | MTDH         | Cluster0005 |
| 15117714 | ENSECAT000000020990 // MTMR3 // myotubularin related protein 3 // --- // 100058825 // X  | MTMR3        | Cluster0005 |
| 15018112 | XM_001504339 // MUL1 // mitochondrial E3 ubiquitin protein ligase 1 // --- // 100058446  | MUL1         | Cluster0005 |
| 15015574 | XM_001914674 // MYSM1 // Myb-like, SWIRM and MPN domains 1 // --- // 100146753 // ENSE   | MYSM1        | Cluster0005 |
| 14960947 | XM_001502506 // MYST2 // K(lysine) acetyltransferase 7 // --- // 100056161 // ENSECAT0   | MYST2        | Cluster0005 |
| 15055813 | ENSECAT000000010292 // MYST3 // K(lysine) acetyltransferase 6A // --- // 100050371 // E  | MYST3        | Cluster0005 |
| 15025836 | XM_001502496 // NAA15 // N(alpha)-acetyltransferase 15, NatA auxiliary subunit // --- /  | NAA15        | Cluster0005 |
| 15008235 | ENSECAT000000022068 // NBEAL1 // neurobeachin-like 1 // --- // ---                       | NBEAL1       | Cluster0005 |
| 14998185 | XM_001499088 // NCK1 // NCK adaptor protein 1 // --- // 100053397 // ENSECAT0000000807   | NCK1         | Cluster0005 |
| 14963499 | XM_001918389 // NCOR1 // nuclear receptor corepressor 1 // --- // 100063285 // ENSECAT   | NCOR1        | Cluster0005 |
| 15090624 | ENSECAT000000009997 // NCSTN // nicastrin // --- // 100058515 // XM_001504431 // NCSTN   | NCSTN        | Cluster0005 |
| 14985204 | ENSECAT000000018788 // NDST1 // N-deacetylase/N-sulfotransferase (heparan glucosaminyl)  | NDST1        | Cluster0005 |
| 15011304 | XM_001505117 // NDUFS1 // NADH dehydrogenase (ubiquinone) Fe-S protein 1, 75kDa (NADH-c  | NDUFS1       | Cluster0005 |
| 15047422 | ENSECAT000000019965 // NEK9 // NIMA (never in mitosis gene a)-related kinase 9 // --- /  | NEK9         | Cluster0005 |
| 14948903 | ENSECAT000000018933 // NEMF // nuclear export mediator factor // --- // 100065895        | NEMF         | Cluster0005 |
| 14997632 | ENSECAT000000024825 // NGLY1 // N-glycanase 1 // --- // 100059456 // XM_001492043 // NG  | NGLY1        | Cluster0005 |
| 15019312 | XM_001496756 // NOC2L // nucleolar complex associated 2 homolog (S. cerevisiae) // ---   | NOC2L        | Cluster0005 |
| 14937043 | ENSECAT000000008566 // NPTN // neuroplastin // --- // 100052106 // XM_001493720 // NPTN  | NPTN         | Cluster0005 |
| 14959508 | ENSECAT000000011306 // NSF // N-ethylmaleimide-sensitive factor // --- // 100063690 //   | NSF          | Cluster0005 |
| 14967499 | XM_001918341 // NUFIP2 // nuclear fragile X mental retardation protein interacting prot  | NUFIP2       | Cluster0005 |
| 15059572 | ENSECAT000000017312 // NUP50 // nucleoporin 50kDa // --- // 100051494 // XM_001488115 /  | NUP50        | Cluster0005 |
| 15128658 | XM_001493372 // OGT // O-linked N-acetylglucosamine (GlcNAc) transferase // --- // 1000  | OGT          | Cluster0005 |
| 15011113 | XM_001503615 // ORC2 // origin recognition complex, subunit 2 // --- // 100067880 // E   | ORC2         | Cluster0005 |
| 15038743 | ENSECAT000000010959 // OSBPL2 // oxysterol binding protein-like 2 // --- // 100051127 // | OSBPL2       | Cluster0005 |
| 15001122 | ENSECAT000000020926 // OXSR1 // oxidative-stress responsive 1 // --- // 100050017 // XM  | OXSR1        | Cluster0005 |

|          |                                                                                          |           |             |
|----------|------------------------------------------------------------------------------------------|-----------|-------------|
| 15002681 | XM_001492258 // PAN3 // PAN3 poly(A) specific ribonuclease subunit homolog (S. cerevisi  | PAN3      | Cluster0005 |
| 14981798 | ENSECAT00000022424 // PANK3 // pantothenate kinase 3 // --- // 100059344 /// XM_0015032  | PANK3     | Cluster0005 |
| 14939581 | XM_001502551 // PARP2 // poly (ADP-ribose) polymerase 2 // --- // 100072572 /// ENSECAT  | PARP2     | Cluster0005 |
| 15065341 | ENSECAT00000025543 // PDPR // pyruvate dehydrogenase phosphatase regulatory subunit //   | PDPR      | Cluster0005 |
| 15020785 | ENSECAT00000026349 // PGRMC2 // progesterone receptor membrane component 2 // --- // --  | PGRMC2    | Cluster0005 |
| 14964268 | XM_001490971 // PGS1 // phosphatidylglycerophosphate synthase 1 // --- // 100057717 ///  | PGS1      | Cluster0005 |
| 15130820 | ENSECAT00000010527 // PIGA // phosphatidylinositol glycan anchor biosynthesis, class A   | PIGA      | Cluster0005 |
| 15023115 | ENSECAT00000017998 // PIGV // phosphatidylinositol glycan anchor biosynthesis, class V   | PIGV      | Cluster0005 |
| 15076539 | XM_001491173 // PION // pigeon homolog (Drosophila) // --- // 100058064 /// ENSECAT0000  | PION      | Cluster0005 |
| 15100625 | ENSECAT00000015675 // PLBD1 // phospholipase B domain containing 1 // --- // 100066968   | PLBD1     | Cluster0005 |
| 14956725 | ENSECAT00000021157 // PNISR // PNN-interacting serine/arginine-rich protein // --- // -  | PNISR     | Cluster0005 |
| 15067222 | NM_001105316 // PPAT // phosphoribosyl pyrophosphate amidotransferase // --- // 1000538  | PPAT      | Cluster0005 |
| 15019736 | XM_001494107 // PPP2R2A // protein phosphatase 2, regulatory subunit B, alpha // --- //  | PPP2R2A   | Cluster0005 |
| 15046932 | XM_001498781 // PPP2R5E // protein phosphatase 2, regulatory subunit B, epsilon isoform  | PPP2R5E   | Cluster0005 |
| 15106512 | ENSECAT00000025164 // PRAM1 // PML-RARA regulated adaptor molecule 1 // --- // ---       | PRAM1     | Cluster0005 |
| 15106728 | XM_001917218 // PRCP // prolylcarboxypeptidase (angiotensinase C) // --- // 100061830 /  | PRCP      | Cluster0005 |
| 15011560 | ENSECAT00000015325 // PRKCI // protein kinase C, iota // --- // 100063737 /// XM_001494  | PRKCI     | Cluster0005 |
| 14990088 | XM_001500870 // PRKD3 // protein kinase D3 // --- // 100054187 /// ENSECAT00000009228 /  | PRKD3     | Cluster0005 |
| 15063484 | ENSECAT00000007036 // PRPF18 // PRP18 pre-mRNA processing factor 18 homolog (S. cerevisi | PRPF18    | Cluster0005 |
| 14951634 | XM_001488065 // PRPF31 // PRP31 pre-mRNA processing factor 31 homolog (S. cerevisiae) /  | PRPF31    | Cluster0005 |
| 14940690 | XM_001493445 // PRPF39 // PRP39 pre-mRNA processing factor 39 homolog (S. cerevisiae) /  | PRPF39    | Cluster0005 |
| 15009273 | XM_003363256 // PRPF40A // PRP40 pre-mRNA processing factor 40 homolog A (S. cerevisiae  | PRPF40A   | Cluster0005 |
| 15113604 | XM_001496455 // PRR14L // proline rich 14-like // --- // 100062987 /// ENSECAT000000236  | PRR14L    | Cluster0005 |
| 15000535 | XM_001495506 // PTPN23 // protein tyrosine phosphatase, non-receptor type 23 // --- //   | PTPN23    | Cluster0005 |
| 15017381 | XM_001916895 // PUM1 // pumilio homolog 1 (Drosophila) // --- // 100070514 /// ENSECAT0  | PUM1      | Cluster0005 |
| 15110348 | XM_001505092 // PUS3 // pseudouridylate synthase 3 // --- // 100064416 /// ENSECAT000000 | PUS3      | Cluster0005 |
| 15074336 | ENSECAT00000019433 // RAB3GAP2 // RAB3 GTPase activating protein subunit 2 (non-cataly   | RAB3GAP2  | Cluster0005 |
| 14986096 | XM_001504442 // RAD50 // RAD50 homolog (S. cerevisiae) // --- // 100063198 /// ENSECAT0  | RAD50     | Cluster0005 |
| 15003831 | ENSECAT00000013783 // RAP2A // RAP2A, member of RAS oncogene family // --- // ---        | RAP2A     | Cluster0005 |
| 15005551 | NM_001163827 // RBM26 // RNA binding motif protein 26 // --- // 100050021 /// ENSECAT00  | RBM26     | Cluster0005 |
| 15109559 | XM_001501445 // RDX // radixin // --- // 100061858 /// ENSECAT00000004590 // RDX // rad  | RDX       | Cluster0005 |
| 15067714 | ENSECAT00000025999 // RFC1 // replication factor C (activator 1) 1, 145kDa // --- // 10  | RFC1      | Cluster0005 |
| 14983652 | ENSECAT00000019853 // RIOK2 // RIO kinase 2 (yeast) // --- // 100064864 /// XM_00150460  | RIOK2     | Cluster0005 |
| 14967080 | ENSECAT00000015507 // RNF135 // ring finger protein 135 // --- // ---                    | RNF135    | Cluster0005 |
| 14985534 | ENSECAT00000003450 // RNF14 // ring finger protein 14 // --- // ---                      | RNF14     | Cluster0005 |
| 14953126 | XM_001504242 // RNF146 // ring finger protein 146 // --- // 100067400 /// ENSECAT000000  | RNF146    | Cluster0005 |
| 15123972 | XM_001492262 // RNF19A // ring finger protein 19A, E3 ubiquitin protein ligase // --- /  | RNF19A    | Cluster0005 |
| 15051394 | ENSECAT00000017322 // RNF38 // ring finger protein 38 // --- // 100055331 /// XM_001504  | RNF38     | Cluster0005 |
| 15004541 | ENSECAT00000014237 // RNF6 // ring finger protein (C3H2C3 type) 6 // --- // 100050743 /  | RNF6      | Cluster0005 |
| 15119329 | XM_001488687 // RNMT // RNA (guanine-7-) methyltransferase // --- // 100050190 /// ENSE  | RNMT      | Cluster0005 |
| 14961469 | XM_001503753 // RPS6KB1 // ribosomal protein S6 kinase, 70kDa, polypeptide 1 // --- //   | RPS6KB1   | Cluster0005 |
| 15071190 | XM_001487986 // RUFY3 // RUN and FYVE domain containing 3 // --- // 100049913 /// ENSEC  | RUFY3     | Cluster0005 |
| 15118851 | XM_001497884 // SBNO1 // strawberry notch homolog 1 (Drosophila) // --- // 100059018 //  | SBNO1     | Cluster0005 |
| 15076040 | ENSECAT00000006620 // SCAF8 // SR-related CTD-associated factor 8 // --- // 100061852 /  | SCAF8     | Cluster0005 |
| 15036301 | DQ402987 // SDHA // succinate dehydrogenase complex, subunit A, flavoprotein (Fp) // --  | SDHA      | Cluster0005 |
| 14964348 | XM_001492545 // SEC14L1 // SEC14-like 1 (S. cerevisiae) // --- // 100050884 /// ENSECAT  | SEC14L1   | Cluster0005 |
| 14934769 | ENSECAT00000023302 // SEC24C // SEC24 family, member C (S. cerevisiae) // --- // 100072  | SEC24C    | Cluster0005 |
| 14938354 | XM_001499778 // SECISBP2L // SECIS binding protein 2-like // --- // 100070100 /// ENSEC  | SECISBP2L | Cluster0005 |
| 15012170 | XM_001498854 // SENP2 // SUMO1/sentrin/SMT3 specific peptidase 2 // --- // 100059276 //  | SENP2     | Cluster0005 |
| 15014563 | XM_001499415 // SENP5 // SUMO1/sentrin specific peptidase 5 // --- // 100069684 /// ENS  | SENP5     | Cluster0005 |
| 15058977 | ENSECAT00000008380 // SH3BP1 // SH3-domain binding protein 1 // --- // 100069810 /// EN  | SH3BP1    | Cluster0005 |
| 15075572 | ENSECAT00000007454 // SHPRH // SNF2 histone linker PHD RING helicase, E3 ubiquitin prot  | SHPRH     | Cluster0005 |
| 15011579 | ENSECAT00000011074 // SKIL // SKI-like oncogene // --- // 100057606 /// XM_001492164 //  | SKIL      | Cluster0005 |
| 14988470 | ENSECAT00000015243 // SLC20A1 // solute carrier family 20 (phosphate transporter), memb  | SLC20A1   | Cluster0005 |

|          |                                                                                         |          |             |
|----------|-----------------------------------------------------------------------------------------|----------|-------------|
| 15087825 | ENSECAT00000009428 // SLC25A24 // solute carrier family 25 (mitochondrial carrier; phos | SLC25A24 | Cluster0005 |
| 15002364 | ENSECAT00000024040 // SLC33A1 // solute carrier family 33 (acetyl-CoA transporter), mem | SLC33A1  | Cluster0005 |
| 15015111 | ENSECAT00000005619 // SLC35A5 // solute carrier family 35, member A5 // --- // 10007147 | SLC35A5  | Cluster0005 |
| 15064853 | ENSECAT00000025033 // SLC7A6 // solute carrier family 7 (amino acid transporter light c | SLC7A6   | Cluster0005 |
| 15102620 | ENSECAT00000022539 // SMARCC2 // SWI/SNF related, matrix associated, actin dependent re | SMARCC2  | Cluster0005 |
| 14990912 | ENSECAT00000024027 // SMC6 // structural maintenance of chromosomes 6 // --- // 1000720 | SMC6     | Cluster0005 |
| 15043881 | ENSECAT00000022765 // SMU1 // smu-1 suppressor of mec-8 and unc-52 homolog (C. elegans) | SMU1     | Cluster0005 |
| 15081783 | XM_001496289 // SNX13 // sorting nexin 13 // --- // 100066218 // ENSECAT00000023365 //  | SNX13    | Cluster0005 |
| 15110516 | XM_001917928 // SNX19 // sorting nexin 19 // --- // 100072714 // ENSECAT00000026141 //  | SNX19    | Cluster0005 |
| 15036539 | XM_001493978 // SNX5 // sorting nexin 5 // --- // 100062401 // ENSECAT00000018594 // S  | SNX5     | Cluster0005 |
| 15004780 | XM_001495257 // SPG20 // spastic paraplegia 20 (Troyer syndrome) // --- // 100062426 // | SPG20    | Cluster0005 |
| 14990047 | NM_001195588 // SRSF7 // serine/arginine-rich splicing factor 7 // --- // 100054033 //  | SRSF7    | Cluster0005 |
| 15129773 | ENSECAT00000023019 // STAG2 // stromal antigen 2 // --- // 100055046 // XM_001915150 /  | STAG2    | Cluster0005 |
| 14990184 | XM_001917846 // STRN // striatin, calmodulin binding protein // --- // 100054418 // EN  | STRN     | Cluster0005 |
| 14961996 | XM_001504156 // SUPT6H // suppressor of Ty 6 homolog (S. cerevisiae) // --- // 10005934 | SUPT6H   | Cluster0005 |
| 14934479 | XM_001917989 // SUPV3L1 // suppressor of var1, 3-like 1 (S. cerevisiae) // --- // 10007 | SUPV3L1  | Cluster0005 |
| 15044077 | XM_001494629 // SYK // spleen tyrosine kinase // --- // 100063383 // ENSECAT0000001022  | SYK      | Cluster0005 |
| 15114320 | XM_001490500 // TAOK3 // TAO kinase 3 // --- // 100050932 // ENSECAT00000007673 // TAO  | TAOK3    | Cluster0005 |
| 15024160 | ENSECAT00000008644 // TARDBP // TAR DNA binding protein // --- // 100051482             | TARDBP   | Cluster0005 |
| 14975900 | ENSECAT00000024613 // TBC1D10B // TBC1 domain family, member 10B // --- // 100063852 // | TBC1D10B | Cluster0005 |
| 14951274 | XM_001917360 // TBC1D17 // TBC1 domain family, member 17 // --- // 100056274 // ENSECA  | TBC1D17  | Cluster0005 |
| 15021209 | XM_003364530 // TBCK // TBC1 domain containing kinase // --- // 100064433 // ENSECAT00  | TBCK     | Cluster0005 |
| 15123552 | ENSECAT00000020705 // TGS1 // trimethylguanosine synthase 1 // --- // 100067973 // XM_  | TGS1     | Cluster0005 |
| 15119564 | ENSECAT00000010001 // THOC1 // THO complex 1 // --- // 100051155 // XM_001491890 // TH  | THOC1    | Cluster0005 |
| 15022499 | XM_001503634 // THRAP3 // thyroid hormone receptor associated protein 3 // --- // 10005 | THRAP3   | Cluster0005 |
| 15003888 | XM_001492116 // TM9SF2 // transmembrane 9 superfamily member 2 // --- // 100061300 //   | TM9SF2   | Cluster0005 |
| 14946652 | ENSECAT00000022946 // TMOD3 // tropomodulin 3 (ubiquitous) // --- // 100069657 // XM_0  | TMOD3    | Cluster0005 |
| 15126983 | NM_001163948 // TMSB4X // thymosin beta 4, X-linked // --- // 100034015 // ENSECAT0000  | TMSB4X   | Cluster0005 |
| 15058116 | XM_001915050 // TMTC3 // transmembrane and tetratricopeptide repeat containing 3 // --- | TMTC3    | Cluster0005 |
| 14972182 | ENSECAT00000022523 // TRAF6 // TNF receptor-associated factor 6, E3 ubiquitin protein 1 | TRAF6    | Cluster0005 |
| 15011156 | ENSECAT00000011350 // TRAK2 // trafficking protein, kinesin binding 2 // --- // 1000662 | TRAK2    | Cluster0005 |
| 15004983 | XM_001488575 // TRIM13 // tripartite motif containing 13 // --- // 100055194 // ENSECA  | TRIM13   | Cluster0005 |
| 15033055 | ENSECAT00000001411 // TRIM23 // tripartite motif containing 23 // --- // 100050517 //   | TRIM23   | Cluster0005 |
| 14952092 | ENSECAT000000011246 // TRIM28 // tripartite motif containing 28 // --- // ---           | TRIM28   | Cluster0005 |
| 14946342 | EF397511 // TRIP4 // thyroid hormone receptor interactor 4 // --- // 100053730          | TRIP4    | Cluster0005 |
| 15126166 | XM_001488158 // TRMT2A // tRNA methyltransferase 2 homolog A (S. cerevisiae) // --- //  | TRMT2A   | Cluster0005 |
| 15073553 | XM_001490824 // TROVE2 // TROVE domain family, member 2 // --- // 100051140 // ENSECAT  | TROVE2   | Cluster0005 |
| 14968998 | ENSECAT00000005911 // TRPV2 // transient receptor potential cation channel, subfamily V | TRPV2    | Cluster0005 |
| 15125043 | XM_001505003 // TSTA3 // tissue specific transplantation antigen P35B // --- // 1000634 | TSTA3    | Cluster0005 |
| 14935417 | ENSECAT00000020934 // TTC13 // tetratricopeptide repeat domain 13 // --- // 100061024   | TTC13    | Cluster0005 |
| 14998400 | XM_001493057 // U2SURP // U2 snRNP-associated SURP domain containing // --- // 10005118 | U2SURP   | Cluster0005 |
| 15127796 | XM_001492947 // UBA1 // ubiquitin-like modifier activating enzyme 1 // --- // 100060792 | UBA1     | Cluster0005 |
| 15118011 | ENSECAT00000009561 // UBE3B // ubiquitin protein ligase E3B // --- // 100059725 // XM_  | UBE3B    | Cluster0005 |
| 15079156 | ENSECAT00000025101 // UBN2 // ubinuclein 2 // --- // ---                                | UBN2     | Cluster0005 |
| 15128147 | NM_001256912 // UBQLN2 // ubiquilin 2 // --- // 100050402                               | UBQLN2   | Cluster0005 |
| 15028626 | ENSECAT00000022605 // UBR2 // ubiquitin protein ligase E3 component n-recogin 2 // ---  | UBR2     | Cluster0005 |
| 15123526 | ENSECAT00000018083 // UBXLN2 // UBXLN2B // UBXLN2 domain protein 2B // --- // ---       | UBXLN2B  | Cluster0005 |
| 15056386 | XM_001490682 // UFSP2 // UFM1-specific peptidase 2 // --- // 100057294 // ENSECAT00000  | UFSP2    | Cluster0005 |
| 15098603 | ENSECAT00000019768 // USP37 // ubiquitin specific peptidase 37 // --- // 100055721 //   | USP37    | Cluster0005 |
| 14996451 | XM_001497962 // USP4 // ubiquitin specific peptidase 4 (proto-oncogene) // --- // 10005 | USP4     | Cluster0005 |
| 14956739 | XM_001503881 // USP45 // ubiquitin specific peptidase 45 // --- // 100071616 // ENSECA  | USP45    | Cluster0005 |
| 15107779 | XM_001501192 // USP47 // ubiquitin specific peptidase 47 // --- // 100071433 // ENSECA  | USP47    | Cluster0005 |
| 14976986 | ENSECAT00000010341 // USP7 // ubiquitin specific peptidase 7 (herpes virus-associated)  | USP7     | Cluster0005 |
| 14946719 | XM_001501923 // USP8 // ubiquitin specific peptidase 8 // --- // 100055443 // ENSECAT0  | USP8     | Cluster0005 |

|          |                                                                                          |         |             |
|----------|------------------------------------------------------------------------------------------|---------|-------------|
| 15111797 | ENSECAT00000025789 // UVVAG // UV radiation resistance associated gene // --- // 100051  | UVVAG   | Cluster0005 |
| 15063432 | NM_001243145 // VIM // vimentin // --- // 100056088 /// ENSECAT00000006522 // VIM // vi  | VIM     | Cluster0005 |
| 15104857 | ENSECAT00000007408 // VPS11 // vacuolar protein sorting 11 homolog (S. cerevisiae) // -  | VPS11   | Cluster0005 |
| 15118731 | XM_001496784 // VPS33A // vacuolar protein sorting 33 homolog A (S. cerevisiae) // ---   | VPS33A  | Cluster0005 |
| 14935664 | ENSECAT00000017845 // WAPAL // wings apart-like homolog (Drosophila) // --- // 10005252  | WAPAL   | Cluster0005 |
| 15098907 | XM_001915567 // WDFY1 // WD repeat and FYVE domain containing 1 // --- // 100061271 ///  | WDFY1   | Cluster0005 |
| 15046289 | ENSECAT00000014118 // WDR20 // WD repeat domain 20 // --- // 100055061 /// XM_001917644  | WDR20   | Cluster0005 |
| 15001041 | XM_001498297 // WDR48 // WD repeat domain 48 // --- // 100068457 /// ENSECAT00000020117  | WDR48   | Cluster0005 |
| 15093950 | ENSECAT00000017868 // XRCC5 // X-ray repair complementing defective repair in Chinese h  | XRCC5   | Cluster0005 |
| 15002015 | ENSECAT00000008803 // XRN1 // 5-3 exoribonuclease 1 // --- // 100051335                  | XRN1    | Cluster0005 |
| 15039078 | XM_003363927 // XRN2 // 5-3 exoribonuclease 2 // --- // 100050094 /// ENSECAT000000020   | XRN2    | Cluster0005 |
| 15119610 | XM_001492336 // YES1 // v-yes-1 Yamaguchi sarcoma viral oncogene homolog 1 // --- // 10  | YES1    | Cluster0005 |
| 15015809 | XM_001488992 // YIPF1 // Yip1 domain family, member 1 // --- // 100050435 /// ENSECAT00  | YIPF1   | Cluster0005 |
| 15045268 | ENSECAT00000017280 // YLPM1 // YLP motif containing 1 // --- // ---                      | YLPM1   | Cluster0005 |
| 15063055 | XM_001495933 // YME1L1 // YME1-like 1 (S. cerevisiae) // --- // 100065311 /// ENSECAT00  | YME1L1  | Cluster0005 |
| 15089252 | ENSECAT00000009946 // YOD1 // YOD1 OTU deubiquinating enzyme 1 homolog (S. cerevisiae)   | YOD1    | Cluster0005 |
| 15059709 | NM_001256974 // ZBED4 // zinc finger, BED-type containing 4 // --- // 100054656 /// ENS  | ZBED4   | Cluster0005 |
| 15013371 | AY246739 // ZBTB11 // zinc finger and BTB domain containing 11 // --- // 100072181 ///   | ZBTB11  | Cluster0005 |
| 14956999 | XM_001504012 // ZBTB24 // zinc finger and BTB domain containing 24 // --- // 100066674   | ZBTB24  | Cluster0005 |
| 15049721 | NM_001257178 // ZBTB34 // zinc finger and BTB domain containing 34 // --- // 100070589   | ZBTB34  | Cluster0005 |
| 14976869 | XM_001491187 // ZC3H7A // zinc finger CCCH-type containing 7A // --- // 100050963 /// E  | ZC3H7A  | Cluster0005 |
| 15125532 | XM_001495455 // ZFC3H1 // zinc finger, C3H1-type containing // --- // 100064600 /// ENS  | ZFC3H1  | Cluster0005 |
| 15063820 | XM_001501531 // ZMYND11 // zinc finger, MYND-type containing 11 // --- // 100057731 ///  | ZMYND11 | Cluster0005 |
| 14978073 | ENSECAT00000017355 // ZNF12 // zinc finger protein 12 // --- // --- /// ENSECAT000000017 | ZNF12   | Cluster0005 |
| 15034053 | XM_001917248 // ZNF622 // zinc finger protein 622 // --- // 100069990 /// ENSECAT000000  | ZNF622  | Cluster0005 |
| 14940842 | ENSECAT00000018811 // ZNF717 // zinc finger protein 717 // --- // --- /// ENSECAT000000  | ZNF717  | Cluster0005 |
| 14952066 | XM_003362245 // ZNF8 // zinc finger protein 8 // --- // 100051604 /// ENSECAT0000001413  | ZNF8    | Cluster0005 |
| 15021494 | ENSECAT00000011700 // ZYG11B // zyg-11 homolog B (C. elegans) // --- // 100061587 /// X  | ZYG11B  | Cluster0005 |
| 15088593 | ENSECAT00000011906 // ZZZ3 // zinc finger, ZZ-type containing 3 // --- // 100053222 ///  | ZZZ3    | Cluster0005 |
