# Supplementary material for: Comparative transcriptome analysis of equine alveolar macrophages
Source: PubMed Central journal article supplement (PMC5412682; doi:10.1111/evj.12584), 2016-07-09
Supplement: EVJ-49-375-s003.pdf [file EVJ-49-375-s003.pdf]

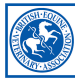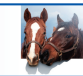

## Supplementary Item 1c: Using BIOLAYOUT : Top clusters of genes more highly expressed in PMs

| Transcript ID | Gene_assignment                                                                          | Gene symbol | MCL_2.2     |
|---------------|------------------------------------------------------------------------------------------|-------------|-------------|
| 15013425      | ENSECAT00000002615 // ABI3BP // ABI family, member 3 (NESH) binding protein // --- // -  | ABI3BP      | Cluster0001 |
| 14987992      | ENSECAT00000000702 // AFF3 // AF4/FMR2 family, member 3 // --- // 100059904 /// XM_0014  | AFF3        | Cluster0001 |
| 15037472      | NM_001164017 // ASIP // agouti signaling protein // --- // 100054335 /// ENSECAT00000000 | ASIP        | Cluster0001 |
| 14965220      | ENSECAT00000016191 // C17orf57 // chromosome 17 open reading frame 57 // --- // ---      | C17orf57    | Cluster0001 |
| 15006416      | ENSECAT00000005374 // C1QL2 // complement component 1, q subcomponent-like 2 // --- //   | C1QL2       | Cluster0001 |
| 14984686      | ENSECAT00000019573 // C5orf50 // chromosome 5 open reading frame 50 // --- // ---        | C5orf50     | Cluster0001 |
| 15030959      | ENSECAT00000017521 // C6orf10 // chromosome 6 open reading frame 10 // --- // ---        | C6orf10     | Cluster0001 |
| 15043815      | ENSECAT00000022313 // C9orf11 // chromosome 9 open reading frame 11 // --- // ---        | C9orf11     | Cluster0001 |
| 15080773      | ENSECAT00000018737 // CAMK2B // calcium/calmodulin-dependent protein kinase II beta //   | CAMK2B      | Cluster0001 |
| 15078434      | NM_001114143 // CAV1 // caveolin 1, caveolae protein, 22kDa // --- // 100055975 /// ENS  | CAV1        | Cluster0001 |
| 15106039      | ENSECAT00000005738 // CCDC151 // coiled-coil domain containing 151 // --- // ---         | CCDC151     | Cluster0001 |
| 14964224      | XM_001490355 // CCDC40 // coiled-coil domain containing 40 // --- // 100056721 /// ENSE  | CCDC40      | Cluster0001 |
| 14969456      | NM_001085435 // CD44 // CD44 molecule (Indian blood group) // --- // 100034221 /// ENSE  | CD44        | Cluster0001 |
| 15065561      | NM_001109812 // CDH13 // cadherin 13, H-cadherin (heart) // --- // 100055760 /// ENSECA  | CDH13       | Cluster0001 |
| 15132900      | XM_001489536 // CHRDL1 // chordin-like 1 // --- // 100059105 /// ENSECAT00000012735 //   | CHRDL1      | Cluster0001 |
| 15058700      | XM_001498399 // CHST11 // carbohydrate (chondroitin 4) sulfotransferase 11 // --- // 10  | CHST11      | Cluster0001 |
| 15093090      | XM_001494684 // CLCA4 // chloride channel accessory 4 // --- // 100063474 /// ENSECAT00  | CLCA4       | Cluster0001 |
| 15118745      | ENSECAT00000010525 // CLIP1 // CAP-GLY domain containing linker protein 1 // --- // ---  | CLIP1       | Cluster0001 |
| 15110136      | XM_001501513 // CLMP // CXADR-like membrane protein // --- // 100071682 /// ENSECAT0000  | CLMP        | Cluster0001 |
| 15024953      | NM_001081944 // CLU // clusterin // --- // 100034172 /// ENSECAT00000007460 // CLU // c  | CLU         | Cluster0001 |
| 14966267      | ENSECAT00000020087 // COL1A1 // collagen, type I, alpha 1 // --- // --- /// ENSECAT0000  | COL1A1      | Cluster0001 |
| 15100521      | ENSECAT00000014627 // CSDA // cold shock domain protein A // --- // ---                  | CSDA        | Cluster0001 |
| 14965860      | ENSECAT00000008953 // CSF3 // colony stimulating factor 3 (granulocyte) // --- // 10003  | CSF3        | Cluster0001 |
| 15016922      | XM_001499027 // CSF3R // colony stimulating factor 3 receptor (granulocyte) // --- // 1  | CSF3R       | Cluster0001 |
| 15071075      | AF053497 // CXCL1 // chemokine (C-X-C motif) ligand 1 (melanoma growth stimulating acti  | CXCL1       | Cluster0001 |
| 15071093      | ENSECAT00000013283 // CXCL6 // chemokine (C-X-C motif) ligand 6 (granulocyte chemotacti  | CXCL6       | Cluster0001 |
| 15093139      | XM_001495078 // CYR61 // cysteine-rich, angiogenic inducer, 61 // --- // 100064066 ///   | CYR61       | Cluster0001 |
| 15060222      | NM_001081925 // DCN // decorin // --- // 100034120 /// ENSECAT00000021671 // DCN // dec  | DCN         | Cluster0001 |
| 14951083      | ENSECAT00000026053 // DKKL1 // dickkopf-like 1 // --- // ---                             | DKKL1       | Cluster0001 |
| 14952887      | XM_001502677 // DSE // dermatan sulfate epimerase // --- // 100072666 /// ENSECAT000000  | DSE         | Cluster0001 |
| 15084109      | ENSECAT00000000771 // DUSP27 // dual specificity phosphatase 27 (putative) // --- // 10  | DUSP27      | Cluster0001 |
| 15095741      | JQ713942 // ENO2 // enolase 2 (gamma, neuronal) // --- // 100052776                      | ENO2        | Cluster0001 |
| 14973124      | ENSECAT00000025250 // FADS1 // fatty acid desaturase 1 // --- // ---                     | FADS1       | Cluster0001 |
| 15060308      | ENSECAT00000022648 // FGD6 // FYVE, RhoGEF and PH domain containing 6 // --- // 1000651  | FGD6        | Cluster0001 |
| 15055978      | AY246707 // FGFR1 // fibroblast growth factor receptor 1 // --- // 100057614 /// XM_001  | FGFR1       | Cluster0001 |
| 15011594      | XM_001493622 // FNDC3B // fibronectin type III domain containing 3B // --- // 100057824  | FNDC3B      | Cluster0001 |

|          |                                                                                          |              |             |
|----------|------------------------------------------------------------------------------------------|--------------|-------------|
| 14966176 | ENSECAT00000008325 // GIP // gastric inhibitory polypeptide // --- // ---                | GIP          | Cluster0001 |
| 14941646 | ENSECAT00000024517 // HABP2 // hyaluronan binding protein 2 // --- // 100068293 /// XM_  | HABP2        | Cluster0001 |
| 15098184 | ENSECAT00000029138 // HMGA2 // high mobility group AT-hook 2 // --- // ---               | HMGA2        | Cluster0001 |
| 15082025 | XM_001499476 // HOXA6 // homeobox A6 // --- // 100054438 /// ENSECAT00000000495 // HOXA  | HOXA6        | Cluster0001 |
| 15043742 | NM_001114537 // IFN-ALPHA2 // interferon-alpha-2 // --- // 100052818 /// ENSECAT00000000 | IFN-ALPHA2   | Cluster0001 |
| 15043747 | NM_001114537 // IFN-ALPHA2 // interferon-alpha-2 // --- // 100052818 /// NM_001114538 /  | IFN-ALPHA2   | Cluster0001 |
| 15080887 | AY752932 // IGFBP-3 // insulin-like growth factor binding protein-3 // --- // 100034155  | IGFBP-3      | Cluster0001 |
| 15089212 | ENSECAT00000009338 // IL10 // interleukin 10 // --- // 100034187 /// NM_001082490 // IL  | IL10         | Cluster0001 |
| 14991995 | ENSECAT00000025409 // IL1A // interleukin 1, alpha // --- // 100064969 /// NM_001082500  | IL1A         | Cluster0001 |
| 15126653 | NM_001082526 // IL1B // interleukin 1, beta // --- // 100034237 /// ENSECAT00000000066   | IL1B         | Cluster0001 |
| 15097702 | ENSECAT00000023772 // IL23A // interleukin 23, alpha subunit p19 // --- // 100034230 //  | IL23A        | Cluster0001 |
| 15071098 | ENSECAT00000016212 // IL8 // interleukin 8 // --- // 100037400 /// NM_001083951 // IL8   | IL8          | Cluster0001 |
| 14965242 | NM_001081802 // ITGB3 // integrin, beta 3 (platelet glycoprotein IIIa, antigen CD61) //  | ITGB3        | Cluster0001 |
| 15077811 | XM_001497221 // ITGB8 // integrin, beta 8 // --- // 100053462 /// ENSECAT00000020530 //  | ITGB8        | Cluster0001 |
| 15041816 | ENSECAT00000017225 // KANK1 // KN motif and ankyrin repeat domains 1 // --- // 10005075  | KANK1        | Cluster0001 |
| 15131319 | XM_001916706 // LOC10049934 // ferritin heavy chain-like // --- // 100049934 /// ENSEC   | LOC10049934  | Cluster0001 |
| 15083298 | ENSECAT00000022470 // LOC100050047 // cationic trypsin-3-like // --- // 100050047 /// X  | LOC100050047 | Cluster0001 |
| 14991447 | XM_001488300 // LOC100050144 // transmembrane protein 182-like // --- // 100050144 ///   | LOC100050144 | Cluster0001 |
| 15083354 | XM_001491416 // LOC100050381 // olfactory receptor 9A4-like // --- // 100050381 /// ENS  | LOC100050381 | Cluster0001 |
| 15002234 | XM_001491224 // LOC100050742 // transmembrane 4 L6 family member 1-like // --- // 10005  | LOC100050742 | Cluster0001 |
| 15023913 | ENSECAT00000005694 // LOC100050750 // transmembrane protein 51-like // --- // 100050750  | LOC100050750 | Cluster0001 |
| 15088053 | ENSECAT00000010311 // LOC100051002 // rho GTPase-activating protein 29-like // --- // 1  | LOC100051002 | Cluster0001 |
| 15097521 | XM_001504776 // LOC100051379 // 11-cis retinol dehydrogenase-like // --- // 100051379 /  | LOC100051379 | Cluster0001 |
| 15030212 | XM_001505026 // LOC100052624 // histone H2A type 1-like // --- // 100052624 /// ENSECAT  | LOC100052624 | Cluster0001 |
| 15030121 | XM_001496648 // LOC100052966 // histone H1.1-like // --- // 100052966 /// ENSECAT000000  | LOC100052966 | Cluster0001 |
| 14950897 | XM_001488567 // LOC100053135 // epididymal sperm-binding protein 1-like // --- // 10005  | LOC100053135 | Cluster0001 |
| 15000429 | ENSECAT00000018328 // LOC100053301 // t-cell leukemia translocation-altered gene protei  | LOC100053301 | Cluster0001 |
| 15095862 | ENSECAT00000026701 // LOC100053371 // solute carrier family 2, facilitated glucose tran  | LOC100053371 | Cluster0001 |
| 15027133 | ENSECAT00000006961 // LOC100053545 // histone H2A type 1-C-like // --- // 100053545      | LOC100053545 | Cluster0001 |
| 15027187 | XM_001505090 // LOC100053619 // high mobility group nucleosome-binding domain-containin  | LOC100053619 | Cluster0001 |
| 15085659 | XM_001504439 // LOC100053816 // signaling lymphocytic activation molecule-like // --- /  | LOC100053816 | Cluster0001 |
| 15129160 | XM_001493412 // LOC100053876 // transcription elongation factor A protein-like 3-like /  | LOC100053876 | Cluster0001 |
| 15107360 | XM_001503971 // LOC100054010 // olfactory receptor 51I1-like // --- // 100054010 /// EN  | LOC100054010 | Cluster0001 |
| 15073333 | ENSECAT00000019204 // LOC100054102 // uncharacterized protein C1orf115 homolog // --- /  | LOC100054102 | Cluster0001 |
| 15088985 | ENSECAT00000007565 // LOC100054345 // vesicle transport protein GOT1A-like // --- // 10  | LOC100054345 | Cluster0001 |
| 15115552 | XM_001489105 // LOC100054445 // NADH dehydrogenase [ubiquinone] flavoprotein 2, mitocho  | LOC100054445 | Cluster0001 |
| 15030482 | ENSECAT00000018981 // LOC100054813 // uncharacterized protein C6orf15-like // --- // 10  | LOC100054813 | Cluster0001 |
| 14997427 | ENSECAT00000021523 // LOC100054924 // serine/threonine-protein kinase DCLK3-like // ---  | LOC100054924 | Cluster0001 |
| 15079475 | ENSECAT00000016877 // LOC100055297 // anionic trypsin-like // --- // 100055297 /// XM_0  | LOC100055297 | Cluster0001 |

|          |                                                                                          |              |             |
|----------|------------------------------------------------------------------------------------------|--------------|-------------|
| 15115595 | XM_001489548 // LOC100055301 // thioredoxin domain-containing protein 2-like // --- //   | LOC100055301 | Cluster0001 |
| 15078295 | ENSECAT00000013708 // LOC100055422 // neuropeptide S receptor-like // --- // 100055422   | LOC100055422 | Cluster0001 |
| 15030475 | XM_001491016 // LOC100055430 // radiation-inducible immediate-early gene IEX-1-like //   | LOC100055430 | Cluster0001 |
| 15072077 | XM_001499463 // LOC100055629 // sodium-dependent phosphate transport protein 2B-like //  | LOC100055629 | Cluster0001 |
| 15066864 | ENSECAT00000020789 // LOC100055761 // ras association domain-containing protein 6-like   | LOC100055761 | Cluster0001 |
| 15079527 | ENSECAT00000003584 // LOC100056093 // transmembrane protein 139-like // --- // 100056093 | LOC100056093 | Cluster0001 |
| 14958187 | XM_001490118 // LOC100056324 // neuronal pentraxin-1-like // --- // 100056324 /// ENSEC  | LOC100056324 | Cluster0001 |
| 15032076 | XM_001503079 // LOC100056506 // glutathione S-transferase A2-like // --- // 100056506 /  | LOC100056506 | Cluster0001 |
| 15045250 | XM_001490453 // LOC100056601 // visual system homeobox 2-like // --- // 100056601 /// E  | LOC100056601 | Cluster0001 |
| 15085821 | ENSECAT00000003234 // LOC100056753 // olfactory receptor 6K3-like // --- // 100056753 /  | LOC100056753 | Cluster0001 |
| 15084141 | ENSECAT00000007097 // LOC100056894 // myelin protein zero-like protein 1-like // --- //  | LOC100056894 | Cluster0001 |
| 15122289 | XM_001496635 // LOC100057055 // protein NOV homolog // --- // 100057055 /// ENSECAT0000  | LOC100057055 | Cluster0001 |
| 14994605 | XM_001503611 // LOC100057240 // DNA-binding protein inhibitor ID-2-like // --- // 10005  | LOC100057240 | Cluster0001 |
| 14961550 | ENSECAT00000003546 // LOC100057520 // vacuolar protein sorting 72 homolog (S. cerevisia  | LOC100057520 | Cluster0001 |
| 14941178 | XM_001490947 // LOC100057676 // G-protein coupled receptor 26-like // --- // 100057676   | LOC100057676 | Cluster0001 |
| 15045327 | ENSECAT00000017213 // LOC100057690 // basic leucine zipper transcriptional factor ATF-1  | LOC100057690 | Cluster0001 |
| 15024826 | XM_001914958 // LOC100057715 // phosphatidylethanolamine-binding protein 4-like // ---   | LOC100057715 | Cluster0001 |
| 15027352 | XM_001491116 // LOC100057985 // olfactory receptor 2B2-like // --- // 100057985 /// ENS  | LOC100057985 | Cluster0001 |
| 15090447 | ENSECAT00000016862 // LOC100058208 // uncharacterized protein C1orf226-like // --- // 1  | LOC100058208 | Cluster0001 |
| 15029606 | XM_001491438 // LOC100058493 // PX domain-containing protein C6orf145-like // --- // 10  | LOC100058493 | Cluster0001 |
| 15088044 | XM_001491449 // LOC100058506 // tissue factor-like // --- // 100058506 /// ENSECAT00000  | LOC100058506 | Cluster0001 |
| 15133078 | XM_001491814 // LOC100058519 // RING finger protein 113A-like // --- // 100058519 /// E  | LOC100058519 | Cluster0001 |
| 15090340 | XM_001493635 // LOC100058590 // uridine-cytidine kinase 2-like // --- // 100058590 ///   | LOC100058590 | Cluster0001 |
| 15053450 | ENSECAT00000006431 // LOC100058638 // protein FAM166A-like // --- // 100058638 /// XM_0  | LOC100058638 | Cluster0001 |
| 15006835 | ENSECAT00000002082 // LOC100058814 // keratin, type I cytoskeletal 18-like // --- // 10  | LOC100058814 | Cluster0001 |
| 14991548 | ENSECAT00000009189 // LOC100058919 // mitogen-activated protein kinase kinase kinase ki  | LOC100058919 | Cluster0001 |
| 15103237 | ENSECAT00000020804 // LOC100058976 // interleukin-22-like // --- // 100058976 /// XM_00  | LOC100058976 | Cluster0001 |
| 15129211 | XM_001503067 // LOC100059187 // protein BEX3-like // --- // 100059187 /// ENSECAT000000  | LOC100059187 | Cluster0001 |
| 15129209 | XM_001503086 // LOC100059264 // WW domain-binding protein 5-like // --- // 100059264 //  | LOC100059264 | Cluster0001 |
| 15076209 | ENSECAT00000023278 // LOC100060503 // uronyl 2-sulfotransferase-like // --- // 10006050  | LOC100060503 | Cluster0001 |
| 15129144 | ENSECAT00000001318 // LOC100060576 // protein ARM CX6-like // --- // 100060576 /// XM_00 | LOC100060576 | Cluster0001 |
| 15056500 | XM_001493010 // LOC100060890 // vascular endothelial growth factor C-like // --- // 100  | LOC100060890 | Cluster0001 |
| 15094377 | ENSECAT00000006785 // LOC100061005 // potassium voltage-gated channel subfamily E membe  | LOC100061005 | Cluster0001 |
| 15100237 | ENSECAT00000013235 // LOC100061006 // homeobox protein NANOG-like // --- // 100061006    | LOC100061006 | Cluster0001 |
| 14991679 | ENSECAT00000011743 // LOC100061333 // cyclic nucleotide-gated cation channel alpha-3-li  | LOC100061333 | Cluster0001 |
| 15111265 | XM_001493466 // LOC100061569 // olfactory receptor 7D4-like // --- // 100061569 /// ENS  | LOC100061569 | Cluster0001 |
| 15013212 | ENSECAT00000001188 // LOC100061617 // zinc finger BED domain-containing protein 2-like   | LOC100061617 | Cluster0001 |
| 15091406 | ENSECAT00000010407 // LOC100061730 // protein S100-A9-like // --- // 100061730 /// XM_0  | LOC100061730 | Cluster0001 |
| 14944245 | XM_001493698 // LOC100061933 // olfactory receptor 6C4-like // --- // 100061933 /// ENS  | LOC100061933 | Cluster0001 |

|          |                                                                                          |              |             |
|----------|------------------------------------------------------------------------------------------|--------------|-------------|
| 15127437 | XM_001493804 // LOC100062107 // melanoma-associated antigen B10-like // --- // 10006210  | LOC100062107 | Cluster0001 |
| 15015428 | ENSECAT00000020647 // LOC100062187 // collagen alpha-1(VIII) chain-like // --- // 10006  | LOC100062187 | Cluster0001 |
| 15064310 | ENSECAT00000019145 // LOC100062332 // c-C motif chemokine 22-like // --- // 100062332 /  | LOC100062332 | Cluster0001 |
| 14970456 | XM_001494183 // LOC100062709 // fatty acid desaturase 2-like // --- // 100062709 /// EN  | LOC100062709 | Cluster0001 |
| 14996478 | XM_001494391 // LOC100063006 // uncharacterized LOC100063006 // --- // 100063006 /// EN  | LOC100063006 | Cluster0001 |
| 15104828 | XM_001503043 // LOC100063180 // uroplakin-2-like // --- // 100063180 /// ENSECAT00000001 | LOC100063180 | Cluster0001 |
| 15130574 | XM_001494562 // LOC100063279 // olfactory receptor 10R2-like // --- // 100063279 /// EN  | LOC100063279 | Cluster0001 |
| 14943309 | XM_001503727 // LOC100063458 // leucine-rich repeat-containing protein 20-like // --- /  | LOC100063458 | Cluster0001 |
| 15016149 | XM_001494678 // LOC100063464 // UPF0632 protein A-like // --- // 100063464 /// ENSECAT0  | LOC100063464 | Cluster0001 |
| 15075503 | XM_001495199 // LOC100064229 // NKG2D ligand 4-like // --- // 100064229 /// ENSECAT0000  | LOC100064229 | Cluster0001 |
| 15111813 | XM_001495302 // LOC100064387 // diacylglycerol O-acyltransferase 2-like // --- // 10006  | LOC100064387 | Cluster0001 |
| 15085955 | XM_001500763 // LOC100064714 // ETS translocation variant 3-like // --- // 100064714 //  | LOC100064714 | Cluster0001 |
| 15102421 | ENSECAT00000007630 // LOC100064738 // protein phosphatase 1 regulatory subunit 1A-like   | LOC100064738 | Cluster0001 |
| 15048002 | XM_001495656 // LOC100064891 // interferon alpha-inducible protein 27-like protein 2-li  | LOC100064891 | Cluster0001 |
| 15110862 | ENSECAT00000023383 // LOC100064925 // zinc finger protein 709-like // --- // 100064925   | LOC100064925 | Cluster0001 |
| 15087145 | ENSECAT00000023956 // LOC100065052 // gap junction alpha-5 protein-like // --- // 10006  | LOC100065052 | Cluster0001 |
| 15064509 | XM_001495994 // LOC100065396 // CKLF-like MARVEL transmembrane domain-containing protei  | LOC100065396 | Cluster0001 |
| 15019280 | ENSECAT00000021228 // LOC100066167 // tumor necrosis factor receptor superfamily member  | LOC100066167 | Cluster0001 |
| 15091909 | ENSECAT00000019862 // LOC100066884 // hydroxyacid oxidase 2-like // --- // 100066884 //  | LOC100066884 | Cluster0001 |
| 15132687 | ENSECAT00000013894 // LOC100067023 // transcription elongation factor A protein-like 4-  | LOC100067023 | Cluster0001 |
| 14972820 | XM_001497247 // LOC100067132 // olfactory receptor 476-like // --- // 100067132 /// ENS  | LOC100067132 | Cluster0001 |
| 15012098 | XM_001497358 // LOC100067260 // transmembrane epididymal protein 1-like // --- // 10006  | LOC100067260 | Cluster0001 |
| 14970114 | XM_001497463 // LOC100067396 // olfactory receptor 1S1-like // --- // 100067396 /// ENS  | LOC100067396 | Cluster0001 |
| 15066093 | XM_001497779 // LOC100067821 // zinc transporter ZIP8-like // --- // 100067821 /// ENSE  | LOC100067821 | Cluster0001 |
| 15078999 | ENSECAT00000007157 // LOC100068106 // non-muscle caldesmon-like // --- // 100068106 ///  | LOC100068106 | Cluster0001 |
| 15053644 | XR_036256 // LOC100068798 // calponin-3-like // --- // 100068798 /// XM_001490827 // LO  | LOC100068798 | Cluster0001 |
| 15068034 | XM_001498741 // LOC100068923 // fibroblast growth factor-binding protein 1-like // ---   | LOC100068923 | Cluster0001 |
| 14977278 | XM_003362763 // LOC100069286 // pyrin-like // --- // 100069286 /// ENSECAT00000006974 /  | LOC100069286 | Cluster0001 |
| 15130275 | XM_001499147 // LOC100069378 // uncharacterized LOC100069378 // --- // 100069378 /// EN  | LOC100069378 | Cluster0001 |
| 15112287 | XM_001499184 // LOC100069414 // olfactory receptor 52H1-like // --- // 100069414 /// EN  | LOC100069414 | Cluster0001 |
| 15068091 | ENSECAT00000015583 // LOC100069539 // cytokine-dependent hematopoietic cell linker-like  | LOC100069539 | Cluster0001 |
| 15035987 | XM_001501124 // LOC100069914 // brain acid soluble protein 1-like // --- // 100069914 /  | LOC100069914 | Cluster0001 |
| 15059084 | XM_001499732 // LOC100070048 // ER lumen protein retaining receptor 3-like // --- // 10  | LOC100070048 | Cluster0001 |
| 14990082 | XM_001499765 // LOC100070088 // cytochrome P450 1B1-like // --- // 100070088 /// ENSECA  | LOC100070088 | Cluster0001 |
| 15034562 | XM_001914909 // LOC100070775 // olfactory receptor 10H4-like // --- // 100070775 /// EN  | LOC100070775 | Cluster0001 |
| 15012958 | ENSECAT00000019225 // LOC100070833 // follistatin-related protein 1-like // --- // 1000  | LOC100070833 | Cluster0001 |
| 15040462 | XM_001503192 // LOC100070893 // antileukoproteinase-like // --- // 100070893 /// ENSECA  | LOC100070893 | Cluster0001 |
| 15061292 | XM_001502807 // LOC100070895 // cytochrome P450 2D14-like // --- // 100070895 /// ENSEC  | LOC100070895 | Cluster0001 |
| 15112574 | ENSECAT00000008816 // LOC100071044 // achaete-scute homolog 3-like // --- // 100071044   | LOC100071044 | Cluster0001 |

|          |                                                                                          |              |             |
|----------|------------------------------------------------------------------------------------------|--------------|-------------|
| 15023175 | XM_001500815 // LOC100071130 // CAMPATH-1 antigen-like // --- // 100071130 /// ENSECAT0  | LOC100071130 | Cluster0001 |
| 14990369 | ENSECAT00000002281 // LOC100071152 // coiled-coil domain-containing protein 121-like //  | LOC100071152 | Cluster0001 |
| 14934007 | XM_001500917 // LOC100071214 // phospholipase A2-like // --- // 100071214 /// ENSECAT00  | LOC100071214 | Cluster0001 |
| 14966722 | ENSECAT00000019709 // LOC100071342 // uncharacterized protein C17orf64-like // --- // 1  | LOC100071342 | Cluster0001 |
| 14985258 | XM_001501485 // LOC100071660 // homeobox protein CDX-1-like // --- // 100071660 /// ENS  | LOC100071660 | Cluster0001 |
| 15110169 | XM_001501632 // LOC100071779 // transmembrane protein 225-like // --- // 100071779 ///   | LOC100071779 | Cluster0001 |
| 15078788 | XM_001501658 // LOC100071801 // tetraspanin-33-like // --- // 100071801 /// ENSECAT0000  | LOC100071801 | Cluster0001 |
| 15110190 | XM_001501768 // LOC100071915 // olfactory receptor 8D4-like // --- // 100071915 /// ENS  | LOC100071915 | Cluster0001 |
| 14994346 | XM_001501905 // LOC100072043 // mesogenin-1-like // --- // 100072043 /// ENSECAT0000000  | LOC100072043 | Cluster0001 |
| 14947737 | ENSECAT00000006789 // LOC100072163 // olfactory receptor 4F3/4F16/4F29-like // --- // 1  | LOC100072163 | Cluster0001 |
| 14967613 | XM_001502177 // LOC100072280 // diazepam-binding inhibitor-like 5-like // --- // 100072  | LOC100072280 | Cluster0001 |
| 14967860 | XM_001918357 // LOC100072577 // olfactory receptor 1A1-like // --- // 100072577 /// ENS  | LOC100072577 | Cluster0001 |
| 14967870 | XM_001502636 // LOC100072630 // olfactory receptor 3A2-like // --- // 100072630 /// ENS  | LOC100072630 | Cluster0001 |
| 14939687 | ENSECAT00000002318 // LOC100072707 // ribonuclease 7-like // --- // 100072707 /// XM_00  | LOC100072707 | Cluster0001 |
| 15085890 | XM_001915440 // LOC100146177 // olfactory receptor 10K2-like // --- // 100146177 /// EN  | LOC100146177 | Cluster0001 |
| 15036426 | XM_001915341 // LOC100146206 // thrombomodulin-like // --- // 100146206 /// ENSECAT0000  | LOC100146206 | Cluster0001 |
| 14954197 | XM_001916316 // LOC100146413 // cytochrome P450 2A13-like // --- // 100146413 /// XM_00  | LOC100146413 | Cluster0001 |
| 14954007 | ENSECAT000000021129 // LOC100147106 // uncharacterized LOC100147106 // --- // 100147106  | LOC100147106 | Cluster0001 |
| 15112423 | XM_001917853 // LOC100147393 // olfactory receptor 2D2-like // --- // 100147393 /// ENS  | LOC100147393 | Cluster0001 |
| 15113767 | ENSECAT00000015807 // LOC100629131 // leukemia inhibitory factor-like // --- // 1006291  | LOC100629131 | Cluster0001 |
| 14939795 | ENSECAT00000011369 // LOC100629138 // uncharacterized LOC100629138 // --- // 100629138   | LOC100629138 | Cluster0001 |
| 15010912 | ENSECAT000000021150 // LOC100629147 // uncharacterized protein C2orf66-like // --- // 10 | LOC100629147 | Cluster0001 |
| 14984257 | XM_003362891 // LOC100629259 // multiple myeloma tumor-associated protein 2-like // ---  | LOC100629259 | Cluster0001 |
| 15068530 | XM_003364698 // LOC100629290 // ATP synthase subunit e, mitochondrial-like // --- // 10  | LOC100629290 | Cluster0001 |
| 14999527 | ENSECAT00000010605 // LOC100629337 // sentan-like // --- // 100629337 /// XM_003363081   | LOC100629337 | Cluster0001 |
| 15056545 | ENSECAT00000007133 // LOC100629456 // beta-defensin 103A-like // --- // 100629456 /// X  | LOC100629456 | Cluster0001 |
| 15030285 | XM_003363755 // LOC100629501 // olfactory receptor 2W1-like // --- // 100629501 /// ENS  | LOC100629501 | Cluster0001 |
| 14939913 | XM_003363631 // LOC100629686 // ig kappa chain V-III region PC 2485/PC 4039-like // ---  | LOC100629686 | Cluster0001 |
| 15091419 | XM_003365022 // LOC100630233 // uncharacterized LOC100630233 // --- // 100630233 /// EN  | LOC100630233 | Cluster0001 |
| 15095597 | XM_003365160 // LOC100630357 // CD27 antigen-like // --- // 100630357 /// ENSECAT000000  | LOC100630357 | Cluster0001 |
| 15063456 | XM_003364358 // LOC100630445 // meiosis expressed gene 1 protein homolog // --- // 1006  | LOC100630445 | Cluster0001 |
| 15048211 | XM_003364027 // LOC100630573 // uncharacterized LOC100630573 // --- // 100630573 /// EN  | LOC100630573 | Cluster0001 |
| 15006898 | ENSECAT00000016455 // LOC100630738 // death-associated protein-like 1-like // --- // 10  | LOC100630738 | Cluster0001 |
| 15099792 | ENSECAT00000019850 // LOC100630897 // uncharacterized protein ENSP00000372125-like // -  | LOC100630897 | Cluster0001 |
| 15060218 | NM_001081780 // LUM // lumican // --- // 100009681 /// ENSECAT00000019349 // LUM // lum  | LUM          | Cluster0001 |
| 15116648 | XM_001489163 // MALT1 // mucosa associated lymphoid tissue lymphoma translocation gene   | MALT1        | Cluster0001 |
| 14998512 | ENSECAT00000008123 // MED12L // mediator complex subunit 12-like // --- // 100056881 //  | MED12L       | Cluster0001 |
| 15070627 | ENSECAT000000026165 // MEPE // matrix extracellular phosphoglycoprotein // --- // ---    | MEPE         | Cluster0001 |
| 15078440 | NM_001114147 // MET // met proto-oncogene (hepatocyte growth factor receptor) // --- //  | MET          | Cluster0001 |

|          |                                                                                          |           |             |
|----------|------------------------------------------------------------------------------------------|-----------|-------------|
| 15071077 | FJ469975 // MIP-2BETA // CXCL3 // --- // 100056258 /// NM_001143793 // MIP-2BETA // CXC  | MIP-2BETA | Cluster0001 |
| 14976229 | ENSECAT0000009720 // MIR1255B // microRNA mir-1255b // --- // 100314985                  | MIR1255B  | Cluster0001 |
| 15072947 | ENSECAT00000016295 // MIR1255B // microRNA mir-1255b // --- // 100314985                 | MIR1255B  | Cluster0001 |
| 15085220 | ENSECAT00000023431 // MIR1255B // microRNA mir-1255b // --- // 100314985                 | MIR1255B  | Cluster0001 |
| 15113559 | NR_032877 // MIR130B // microRNA mir-130b // --- // 100314829                            | MIR130B   | Cluster0001 |
| 14966148 | NR_032903 // MIR196A // microRNA mir-196a // --- // 100314843                            | MIR196A   | Cluster0001 |
| 15012291 | NR_032968 // MIR28 // microRNA mir-28 // --- // 100314878                                | MIR28     | Cluster0001 |
| 15085386 | NR_032844 // MIR29B-2 // microRNA mir-29b-2 // --- // 100315047                          | MIR29B-2  | Cluster0001 |
| 14958183 | NR_032909 // MIR338 // microRNA mir-338 // --- // 100315012                              | MIR338    | Cluster0001 |
| 15046172 | NR_033023 // MIR382 // microRNA mir-382 // --- // 100314908                              | MIR382    | Cluster0001 |
| 14945014 | NR_032791 // MIR7 // microRNA mir-7 // --- // 100314782                                  | MIR7      | Cluster0001 |
| 15086111 | NR_032849 // MIR9A // microRNA mir-9a // --- // 100314814                                | MIR9A     | Cluster0001 |
| 15031201 | NM_001163967 // MLN // motilin // --- // 100033882 /// ENSECAT00000014700 // MLN // mot  | MLN       | Cluster0001 |
| 14940063 | ENSECAT00000009008 // MMP14 // matrix metalloproteinase 14 (membrane-inserted) // --- // | MMP14     | Cluster0001 |
| 15130678 | XM_001500228 // MXRA5 // matrix-remodelling associated 5 // --- // 100063681 /// ENSECA  | MXRA5     | Cluster0001 |
| 14937807 | ENSECAT00000026465 // MYO1E // myosin IE // --- // 100068162                             | MYO1E     | Cluster0001 |
| 15000964 | ENSECAT00000006532 // MYRIP // myosin VIIA and Rab interacting protein // --- // 100068  | MYRIP     | Cluster0001 |
| 14991781 | XM_001493945 // NCAPH // non-SMC condensin I complex, subunit H // --- // 100062353 ///  | NCAPH     | Cluster0001 |
| 15020168 | XM_001499988 // NPY1R // neuropeptide Y receptor Y1 // --- // 100061686 /// ENSECAT0000  | NPY1R     | Cluster0001 |
| 15028083 | ENSECAT00000014028 // PACSIN1 // protein kinase C and casein kinase substrate in neuron  | PACSIN1   | Cluster0001 |
| 14975354 | AF508034 // PAI-1 // plasminogen activator inhibitor-1 // --- // 100033931               | PAI-1     | Cluster0001 |
| 14942909 | XM_001501590 // PAPSS2 // 3 -phosphoadenosine 5 -phosphosulfate synthase 2 // --- // 10  | PAPSS2    | Cluster0001 |
| 15107842 | XM_001501248 // PARVA // parvin, alpha // --- // 100071481 /// ENSECAT00000006448 // PA  | PARVA     | Cluster0001 |
| 15054155 | ENSECAT00000012965 // PCP4 // Purkinje cell protein 4 // --- // ---                      | PCP4      | Cluster0001 |
| 15054272 | ENSECAT00000018858 // PDE9A // phosphodiesterase 9A // --- // 100057783 /// XM_00149100  | PDE9A     | Cluster0001 |
| 15015170 | ENSECAT00000017734 // PHLDB2 // pleckstrin homology-like domain, family B, member 2 //   | PHLDB2    | Cluster0001 |
| 15024531 | XM_001492978 // PRDM16 // PR domain containing 16 // --- // 100060844 /// ENSECAT000000  | PRDM16    | Cluster0001 |
| 15039487 | NM_001091537 // PRND // prion protein 2 (dublet) // --- // 100048937 /// ENSECAT00000000 | PRND      | Cluster0001 |
| 14995104 | ENSECAT00000015237 // PRRT3 // proline-rich transmembrane protein 3 // --- // 100058227  | PRRT3     | Cluster0001 |
| 15024131 | XM_001915116 // PTCHD2 // patched domain containing 2 // --- // 100056461 /// ENSECAT00  | PTCHD2    | Cluster0001 |
| 15052916 | NM_001081935 // PTGES // prostaglandin E synthase // --- // 100034143 /// ENSECAT000000  | PTGES     | Cluster0001 |
| 15038468 | XM_001488269 // PTPN1 // protein tyrosine phosphatase, non-receptor type 1 // --- // 10  | PTPN1     | Cluster0001 |
| 15011434 | ENSECAT00000004554 // PTX3 // pentraxin 3, long // --- // ---                            | PTX3      | Cluster0001 |
| 15083493 | ENSECAT00000015490 // RARRES2 // retinoic acid receptor responder (tazarotene induced)   | RARRES2   | Cluster0001 |
| 14953625 | ENSECAT00000027119 // SBSN // suprabasin // --- // ---                                   | SBSN      | Cluster0001 |
| 14942247 | ENSECAT00000015611 // SCD // stearoyl-CoA desaturase (delta-9-desaturase) // --- // 100  | SCD       | Cluster0001 |
| 15076479 | XM_001489227 // SEMA3C // sema domain, immunoglobulin domain (Ig), short basic domain,   | SEMA3C    | Cluster0001 |
| 15116856 | XM_003365564 // SERPINB2 // serpin peptidase inhibitor, clade B (ovalbumin), member 2 /  | SERPINB2  | Cluster0001 |
| 14946275 | XM_001496554 // SLC24A1 // solute carrier family 24 (sodium/potassium/calcium exchanger  | SLC24A1   | Cluster0001 |

|          |                                                                                          |          |             |
|----------|------------------------------------------------------------------------------------------|----------|-------------|
| 15070053 | ENSECAT00000009904 // SLC7A5 // solute carrier family 7 (amino acid transporter light c  | SLC7A5   | Cluster0001 |
| 15119256 | ENSECAT00000000446 // SOGA2 // SOGA family member 2 // --- // ---                        | SOGA2    | Cluster0001 |
| 15081313 | XM_001492219 // STEAP4 // STEAP family member 4 // --- // 100059718 /// ENSECAT000000020 | STEAP4   | Cluster0001 |
| 15010859 | XM_001917776 // STK17B // serine/threonine kinase 17b // --- // 100054971 /// ENSECAT00  | STK17B   | Cluster0001 |
| 14966237 | ENSECAT00000015515 // TAC4 // tachykinin 4 (hemokinin) // --- // ---                     | TAC4     | Cluster0001 |
| 15120364 | ENSECAT00000018691 // TCF7L2 // transcription factor 7-like 2 (T-cell specific, HMG-box  | TCF7L2   | Cluster0001 |
| 15095464 | XM_001915384 // TEAD4 // TEA domain family member 4 // --- // 100057619 /// ENSECAT0000  | TEAD4    | Cluster0001 |
| 14947542 | XM_001503599 // THBS1 // thrombospondin 1 // --- // 100057478 /// ENSECAT00000009707 //  | THBS1    | Cluster0001 |
| 15075897 | NM_001163117 // THBS2 // thrombospondin 2 // --- // 100050044 /// ENSECAT00000023244 //  | THBS2    | Cluster0001 |
| 15119210 | ENSECAT00000011590 // TMEM200C // transmembrane protein 200C // --- // ---               | TMEM200C | Cluster0001 |
| 14946662 | XM_001501574 // TMOD2 // tropomodulin 2 (neuronal) // --- // 100055095 /// XM_003363503  | TMOD2    | Cluster0001 |
| 15098543 | ENSECAT00000015236 // TNP1 // transition protein 1 (during histone to protamine replace  | TNP1     | Cluster0001 |
| 14939998 | ENSECAT00000017987 // TRAV40 // T cell receptor alpha variable 40 // --- // ---          | TRAV40   | Cluster0001 |
| 14939897 | ENSECAT00000003631 // TRAV9-1 // T cell receptor alpha variable 9-1 // --- // ---        | TRAV9-1  | Cluster0001 |
| 15045393 | ENSECAT00000022464 // VASH1 // vasohibin 1 // --- // 100051887 /// XM_001492980 // VASH  | VASH1    | Cluster0001 |
| 15087838 | ENSECAT00000012045 // VAV3 // vav 3 guanine nucleotide exchange factor // --- // 100057  | VAV3     | Cluster0001 |
| 15028900 | NM_001081821 // VEGFA // vascular endothelial growth factor A // --- // 100033839 /// E  | VEGFA    | Cluster0001 |
| 15053570 | ENSECAT00000010919 // VGLL3 // vestigial like 3 (Drosophila) // --- // 100069930 /// XM  | VGLL3    | Cluster0001 |
| 15027294 | XM_001504891 // ZKSCAN4 // zinc finger with KRAB and SCAN domains 4 // --- // 100052276  | ZKSCAN4  | Cluster0001 |
| 15027283 | ENSECAT00000006780 // ZNF187 // zinc finger protein 187 // --- // 100061664 /// XM_0014  | ZNF187   | Cluster0001 |
| 15119740 | ENSECAT00000006598 // ZNF521 // zinc finger protein 521 // --- // 100063937 /// XM_0014  | ZNF521   | Cluster0001 |
| 15120887 | XM_001491115 // ZNF704 // zinc finger protein 704 // --- // 100057981 /// ENSECAT000000  | ZNF704   | Cluster0001 |
| 14925679 | ---                                                                                      |          | Cluster0008 |
| 14925709 | ---                                                                                      |          | Cluster0008 |
| 14925909 | ---                                                                                      |          | Cluster0008 |
| 14926101 | ---                                                                                      |          | Cluster0008 |
| 14926311 | ---                                                                                      |          | Cluster0008 |
| 14926347 | ---                                                                                      |          | Cluster0008 |
| 14926353 | ---                                                                                      |          | Cluster0008 |
| 14926429 | ---                                                                                      |          | Cluster0008 |
| 14926483 | ---                                                                                      |          | Cluster0008 |
| 14926517 | ---                                                                                      |          | Cluster0008 |
| 14926599 | ---                                                                                      |          | Cluster0008 |
| 14926677 | ---                                                                                      |          | Cluster0008 |
| 14926775 | ---                                                                                      |          | Cluster0008 |
| 14926853 | ---                                                                                      |          | Cluster0008 |
| 14926879 | ---                                                                                      |          | Cluster0008 |
| 14926931 | ---                                                                                      |          | Cluster0008 |
| 14926993 | ---                                                                                      |          | Cluster0008 |

|          |     |             |
|----------|-----|-------------|
| 14927463 | --- | Cluster0008 |
| 14927627 | --- | Cluster0008 |
| 14927783 | --- | Cluster0008 |
| 14927839 | --- | Cluster0008 |
| 14927871 | --- | Cluster0008 |
| 14927897 | --- | Cluster0008 |
| 14927941 | --- | Cluster0008 |
| 14927965 | --- | Cluster0008 |
| 14928103 | --- | Cluster0008 |
| 14928215 | --- | Cluster0008 |
| 14928219 | --- | Cluster0008 |
| 14928941 | --- | Cluster0008 |
| 14929149 | --- | Cluster0008 |
| 14929225 | --- | Cluster0008 |
| 14929339 | --- | Cluster0008 |
| 14929359 | --- | Cluster0008 |
| 14929439 | --- | Cluster0008 |
| 14929449 | --- | Cluster0008 |
| 14929567 | --- | Cluster0008 |
| 14930097 | --- | Cluster0008 |
| 14930105 | --- | Cluster0008 |
| 14930187 | --- | Cluster0008 |
| 14930685 | --- | Cluster0008 |
| 14930701 | --- | Cluster0008 |
| 14930995 | --- | Cluster0008 |
| 14931029 | --- | Cluster0008 |
| 14931095 | --- | Cluster0008 |
| 14931235 | --- | Cluster0008 |
| 14931237 | --- | Cluster0008 |
| 14931247 | --- | Cluster0008 |
| 14931421 | --- | Cluster0008 |
| 14931607 | --- | Cluster0008 |
| 14935613 | --- | Cluster0008 |
| 14939915 | --- | Cluster0008 |
| 14944397 | --- | Cluster0008 |
| 14944469 | --- | Cluster0008 |
| 14952137 | --- | Cluster0008 |
| 14952392 | --- | Cluster0008 |
| 14952603 | --- | Cluster0008 |



|          |     |             |
|----------|-----|-------------|
| 14962151 | --- | Cluster0008 |
| 14962272 | --- | Cluster0008 |
| 14973825 | --- | Cluster0008 |
| 14979959 | --- | Cluster0008 |
| 14981165 | --- | Cluster0008 |
| 14984378 | --- | Cluster0008 |
| 14985555 | --- | Cluster0008 |
| 14986173 | --- | Cluster0008 |
| 14986309 | --- | Cluster0008 |
| 14989310 | --- | Cluster0008 |
| 14993032 | --- | Cluster0008 |
| 14999525 | --- | Cluster0008 |
| 15001639 | --- | Cluster0008 |
| 15006577 | --- | Cluster0008 |
| 15010789 | --- | Cluster0008 |
| 15011477 | --- | Cluster0008 |
| 15013224 | --- | Cluster0008 |
| 15015663 | --- | Cluster0008 |
| 15029053 | --- | Cluster0008 |
| 15033042 | --- | Cluster0008 |
| 15046106 | --- | Cluster0008 |
| 15048739 | --- | Cluster0008 |
| 15049712 | --- | Cluster0008 |
| 15053282 | --- | Cluster0008 |
| 15057650 | --- | Cluster0008 |
| 15059385 | --- | Cluster0008 |
| 15067801 | --- | Cluster0008 |
| 15070773 | --- | Cluster0008 |
| 15079412 | --- | Cluster0008 |
| 15082710 | --- | Cluster0008 |
| 15086646 | --- | Cluster0008 |
| 15088522 | --- | Cluster0008 |
| 15097171 | --- | Cluster0008 |
| 15099749 | --- | Cluster0008 |
| 15102129 | --- | Cluster0008 |
| 15102222 | --- | Cluster0008 |
| 15102534 | --- | Cluster0008 |
| 15104006 | --- | Cluster0008 |
| 15105087 | --- | Cluster0008 |

|          |     |             |
|----------|-----|-------------|
| 15111490 | --- | Cluster0008 |
| 15116401 | --- | Cluster0008 |
| 15122250 | --- | Cluster0008 |
| 15123452 | --- | Cluster0008 |
| 15125646 | --- | Cluster0008 |
| 15129566 | --- | Cluster0008 |
| 15131760 | --- | Cluster0008 |
| 15132341 | --- | Cluster0008 |
| 15133009 | --- | Cluster0008 |
| 15134260 | --- | Cluster0008 |
| 15134366 | --- | Cluster0008 |
| 15134522 | --- | Cluster0008 |
| 15134654 | --- | Cluster0008 |
| 15134780 | --- | Cluster0008 |
| 15134820 | --- | Cluster0008 |
| 15135106 | --- | Cluster0008 |
| 15135126 | --- | Cluster0008 |
| 15135208 | --- | Cluster0008 |
| 15135270 | --- | Cluster0008 |
| 15135314 | --- | Cluster0008 |
| 15135324 | --- | Cluster0008 |
| 15135408 | --- | Cluster0008 |
| 15135760 | --- | Cluster0008 |
| 15135844 | --- | Cluster0008 |
| 15135874 | --- | Cluster0008 |
| 15135918 | --- | Cluster0008 |
| 15135954 | --- | Cluster0008 |
| 15136136 | --- | Cluster0008 |
| 15136150 | --- | Cluster0008 |
| 15136430 | --- | Cluster0008 |
| 15136462 | --- | Cluster0008 |
| 15136488 | --- | Cluster0008 |
| 15136592 | --- | Cluster0008 |
| 15136644 | --- | Cluster0008 |
| 15136776 | --- | Cluster0008 |
| 15136900 | --- | Cluster0008 |
| 15137066 | --- | Cluster0008 |
| 15137168 | --- | Cluster0008 |
| 15137240 | --- | Cluster0008 |

|          |                                                                                          |              |             |
|----------|------------------------------------------------------------------------------------------|--------------|-------------|
| 15137266 | ---                                                                                      |              | Cluster0008 |
| 15137414 | ---                                                                                      |              | Cluster0008 |
| 15137686 | ---                                                                                      |              | Cluster0008 |
| 15137708 | ---                                                                                      |              | Cluster0008 |
| 15137716 | ---                                                                                      |              | Cluster0008 |
| 15137798 | ---                                                                                      |              | Cluster0008 |
| 15137805 | ---                                                                                      |              | Cluster0008 |
| 15137870 | ---                                                                                      |              | Cluster0008 |
| 15137872 | ---                                                                                      |              | Cluster0008 |
| 15137881 | ---                                                                                      |              | Cluster0008 |
| 15137882 | ---                                                                                      |              | Cluster0008 |
| 15038886 | ENSECAT00000020772 // ABHD16B // abhydrolase domain containing 16B // --- // ---         | ABHD16B      | Cluster0008 |
| 14963231 | ENSECAT00000016409 // ARHGEF15 // Rho guanine nucleotide exchange factor (GEF) 15 // --  | ARHGEF15     | Cluster0008 |
| 15024516 | ENSECAT00000016582 // ARHGEF16 // Rho guanine nucleotide exchange factor (GEF) 16 // --  | ARHGEF16     | Cluster0008 |
| 14962755 | XM_001918131 // BCL6B // B-cell CLL/lymphoma 6, member B // --- // 100147131 /// ENSECA  | BCL6B        | Cluster0008 |
| 14943336 | ENSECAT00000019253 // C10orf54 // chromosome 10 open reading frame 54 // --- // ---      | C10orf54     | Cluster0008 |
| 15112567 | ENSECAT00000008142 // C11orf16 // chromosome 11 open reading frame 16 // --- // ---      | C11orf16     | Cluster0008 |
| 15107936 | NM_001081854 // CALCA // calcitonin-related polypeptide alpha // --- // 100033906 /// N  | CALCA        | Cluster0008 |
| 15111743 | ENSECAT00000016388 // CAPN5 // calpain 5 // --- // 100063478                             | CAPN5        | Cluster0008 |
| 14974792 | ENSECAT00000006863 // CARD11 // caspase recruitment domain family, member 11 // --- //   | CARD11       | Cluster0008 |
| 14993005 | ENSECAT00000010114 // CCDC85A // coiled-coil domain containing 85A // --- // 100052299   | CCDC85A      | Cluster0008 |
| 15090820 | NM_001252308 // CD1A7 // CD1a7 molecule // --- // 100034037 /// JF749872 // CD1A7 // CD  | CD1A7        | Cluster0008 |
| 15015780 | ENSECAT00000000539 // CDCP2 // CUB domain containing protein 2 // --- // ---             | CDCP2        | Cluster0008 |
| 14948149 | XM_001493841 // CEBPE // CCAAT/enhancer binding protein (C/EBP), epsilon // --- // 1000  | CEBPE        | Cluster0008 |
| 14947331 | ENSECAT00000010310 // CHAC1 // ChaC, cation transport regulator homolog 1 (E. coli) //   | CHAC1        | Cluster0008 |
| 14939456 | NM_001257079 // CHRM5 // cholinergic receptor, muscarinic 5 // --- // 100057856 /// ENS  | CHRM5        | Cluster0008 |
| 15100209 | ENSECAT00000013388 // CLEC4A // C-type lectin domain family 4, member A // --- // ---    | CLEC4A       | Cluster0008 |
| 14961081 | ENSECAT00000005184 // EPN3 // epsin 3 // --- // 100056408 /// XM_001502825 // EPN3 // e  | EPN3         | Cluster0008 |
| 15038308 | XM_001500956 // EYA2 // eyes absent homolog 2 (Drosophila) // --- // 100071250 /// ENSE  | EYA2         | Cluster0008 |
| 15085905 | ENSECAT00000002770 // FCRL1 // Fc receptor-like 1 // --- // ---                          | FCRL1        | Cluster0008 |
| 15097849 | NM_001163860 // GLI1 // GLI family zinc finger 1 // --- // 100033937 /// ENSECAT00000001 | GLI1         | Cluster0008 |
| 15128370 | ENSECAT00000007595 // HEPH // hephaestin // --- // 100065379 /// ENSECAT00000008319 //   | HEPH         | Cluster0008 |
| 15099152 | ENSECAT00000020611 // HTR2B // 5-hydroxytryptamine (serotonin) receptor 2B, G protein-c  | HTR2B        | Cluster0008 |
| 15083118 | ENSECAT00000009043 // KLRG2 // killer cell lectin-like receptor subfamily G, member 2 /  | KLRG2        | Cluster0008 |
| 15102044 | XM_001504373 // KRT80 // keratin 80 // --- // 100061386 /// ENSECAT00000020408 // KRT80  | KRT80        | Cluster0008 |
| 14955109 | ENSECAT00000007582 // LHB // luteinizing hormone beta polypeptide // --- // 100054774 /  | LHB          | Cluster0008 |
| 15111687 | XM_001493089 // LOC100051297 // thyroid hormone-inducible hepatic protein-like // --- /  | LOC100051297 | Cluster0008 |
| 15037061 | ENSECAT00000020257 // LOC100053209 // syntenin-2-like // --- // 100053209 /// XM_001498  | LOC100053209 | Cluster0008 |
| 15064761 | ENSECAT00000011127 // LOC100053459 // uncharacterized protein C16orf86-like // --- // 1  | LOC100053459 | Cluster0008 |

|          |                                                                                           |              |             |
|----------|-------------------------------------------------------------------------------------------|--------------|-------------|
| 15016612 | XM_001503167 // LOC100053741 // guanylin-like // --- // 100053741 /// ENSECAT0000001606   | LOC100053741 | Cluster0008 |
| 14948439 | ENSECAT00000004616 // LOC100053921 // cathepsin G-like // --- // 100053921 /// XM_00148   | LOC100053921 | Cluster0008 |
| 15117334 | XM_001488939 // LOC100054068 // cationic amino acid transporter 4-like // --- // 100054   | LOC100054068 | Cluster0008 |
| 15084600 | XM_001488945 // LOC100054083 // uncharacterized LOC100054083 // --- // 100054083 /// EN   | LOC100054083 | Cluster0008 |
| 15133326 | XM_001500119 // LOC100054460 // glucose-dependent insulinotropic receptor-like // --- /   | LOC100054460 | Cluster0008 |
| 15041518 | ENSECAT00000011551 // LOC100054543 // solute carrier family 28 member 3-like // --- //    | LOC100054543 | Cluster0008 |
| 15027576 | ENSECAT00000007981 // LOC100054623 // transcription factor 19-like // --- // 100054623    | LOC100054623 | Cluster0008 |
| 14951719 | ENSECAT00000013265 // LOC100054684 // leukocyte immunoglobulin-like receptor subfamily    | LOC100054684 | Cluster0008 |
| 15016860 | ENSECAT00000022762 // LOC100054694 // uncharacterized protein C1orf109-like // --- // 1   | LOC100054694 | Cluster0008 |
| 15007937 | ENSECAT00000003799 // LOC100054877 // glyceraldehyde-3-phosphate dehydrogenase-like //    | LOC100054877 | Cluster0008 |
| 14974408 | XM_001494406 // LOC100055133 // cell cycle exit and neuronal differentiation protein 1-   | LOC100055133 | Cluster0008 |
| 15085879 | XM_001490012 // LOC100056143 // olfactory receptor 6Y1-like // --- // 100056143 /// ENS   | LOC100056143 | Cluster0008 |
| 15040523 | ENSECAT00000001682 // LOC100056463 // uncharacterized protein C20orf165-like // --- //    | LOC100056463 | Cluster0008 |
| 15114522 | ENSECAT00000009610 // LOC100056522 // IQ domain-containing protein D-like // --- // 100   | LOC100056522 | Cluster0008 |
| 15083385 | XM_003364861 // LOC100056743 // olfactory receptor 2F1-like // --- // 100056743 /// ENS   | LOC100056743 | Cluster0008 |
| 15017538 | XM_001916996 // LOC100056922 // CD164 sialomucin-like 2 protein-like // --- // 10005692   | LOC100056922 | Cluster0008 |
| 14939197 | ENSECAT00000018101 // LOC100057278 // uncharacterized protein C15orf52 homolog // --- /   | LOC100057278 | Cluster0008 |
| 14964264 | XM_001490814 // LOC100057363 // complement C1q tumor necrosis factor-related protein 1-   | LOC100057363 | Cluster0008 |
| 15057026 | XM_001493384 // LOC100057875 // eukaryotic translation initiation factor 4E-binding pro   | LOC100057875 | Cluster0008 |
| 15027603 | ENSECAT00000000873 // LOC100058321 // lymphotoxin-alpha-like // --- // 100058321 /// XM   | LOC100058321 | Cluster0008 |
| 15130347 | XM_001491513 // LOC100058594 // extracellular matrix protein 2-like // --- // 100058594   | LOC100058594 | Cluster0008 |
| 15115013 | XM_001497564 // LOC100058978 // ADP-ribosylation factor-like protein 6-interacting prot   | LOC100058978 | Cluster0008 |
| 14967390 | XM_001504168 // LOC100059380 // protein PROCA1-like // --- // 100059380 /// XM_00336242   | LOC100059380 | Cluster0008 |
| 15127305 | XM_003365749 // LOC100059831 // probable ATP-dependent RNA helicase DDX53-like // --- /   | LOC100059831 | Cluster0008 |
| 14999355 | XM_003363061 // LOC100059905 // histone-lysine N-methyltransferase SETMAR-like // --- /   | LOC100059905 | Cluster0008 |
| 15133241 | XM_001500572 // LOC100059927 // 60S ribosomal protein L7a-like // --- // 100059927 //     | LOC100059927 | Cluster0008 |
| 15030964 | XM_001492393 // LOC100059994 // patr class I histocompatibility antigen, A-126 alpha ch   | LOC100059994 | Cluster0008 |
| 14971746 | XM_001492674 // LOC100060412 // protein TSSC4-like // --- // 100060412 /// ENSECAT00000   | LOC100060412 | Cluster0008 |
| 15046499 | ENSECAT00000004273 // LOC100060888 // transmembrane protein C14orf180 homolog // --- //   | LOC100060888 | Cluster0008 |
| 15019854 | ENSECAT00000016483 // LOC100061049 // nociceptin-like // --- // 100061049 /// XM_001493   | LOC100061049 | Cluster0008 |
| 15019999 | XM_001498819 // LOC100061162 // high mobility group protein B2-like // --- // 100061162   | LOC100061162 | Cluster0008 |
| 15013081 | ENSECAT00000026424 // LOC100061258 // basic helix-loop-helix domain-containing protein    | LOC100061258 | Cluster0008 |
| 15097112 | ENSECAT00000008634 // LOC100062582 // ankyrin repeat domain-containing protein 33-like    | LOC100062582 | Cluster0008 |
| 15122678 | XM_001505016 // LOC100063721 // prostate stem cell antigen-like // --- // 100063721 ///   | LOC100063721 | Cluster0008 |
| 15086158 | ENSECAT00000022658 // LOC100064070 // progesterin and adipoQ receptor family member 6-lik | LOC100064070 | Cluster0008 |
| 15105273 | XM_001505066 // LOC100064156 // pannexin-3-like // --- // 100064156 /// ENSECAT00000001   | LOC100064156 | Cluster0008 |
| 15074604 | ENSECAT00000025624 // LOC100064677 // v-type proton ATPase subunit G 3-like // --- // 1   | LOC100064677 | Cluster0008 |
| 15082993 | XM_001499721 // LOC100064880 // pleiotrophin-like // --- // 100064880 /// ENSECAT000000   | LOC100064880 | Cluster0008 |
| 15000633 | XM_001495793 // LOC100065097 // transmembrane inner ear expressed protein-like // --- /   | LOC100065097 | Cluster0008 |

|          |                                                                                         |              |             |
|----------|-----------------------------------------------------------------------------------------|--------------|-------------|
| 15019937 | ENSECAT00000021620 // LOC100065126 // transcription factor GATA-4-like // --- // 100065 | LOC100065126 | Cluster0008 |
| 14977810 | ENSECAT00000025119 // LOC100066340 // inactive rhomboid protein 1-like // --- // 100066 | LOC100066340 | Cluster0008 |
| 15118153 | XM_001497207 // LOC100067080 // cationic amino acid transporter 4-like // --- // 100067 | LOC100067080 | Cluster0008 |
| 14932336 | ENSECAT00000013004 // LOC100067156 // synaptonemal complex central element protein 1-li | LOC100067156 | Cluster0008 |
| 14978331 | XM_001505025 // LOC100067175 // olfactory receptor 2AE1-like // --- // 100067175 // EN  | LOC100067175 | Cluster0008 |
| 15109262 | ENSECAT00000022319 // LOC100068095 // calmodulin-regulated spectrin-associated protein  | LOC100068095 | Cluster0008 |
| 15043910 | ENSECAT00000014764 // LOC100068324 // aquaporin-7-like // --- // 100068324 // XM_00149  | LOC100068324 | Cluster0008 |
| 15016691 | XM_001916493 // LOC100068415 // protein L-Myc-1-like // --- // 100068415 // ENSECAT000  | LOC100068415 | Cluster0008 |
| 15050850 | ENSECAT00000020330 // LOC100068625 // uncharacterized LOC100068625 // --- // 100068625  | LOC100068625 | Cluster0008 |
| 15112248 | ENSECAT00000012801 // LOC100068926 // hemoglobin subunit epsilon-like // --- // 1000689 | LOC100068926 | Cluster0008 |
| 15016979 | ENSECAT00000013270 // LOC100069339 // collagen alpha-2(VIII) chain-like // --- // 10006 | LOC100069339 | Cluster0008 |
| 14977270 | ENSECAT00000024960 // LOC100069430 // zinc finger protein 434-like // --- // 100069430  | LOC100069430 | Cluster0008 |
| 15068142 | XM_001499406 // LOC100069677 // neuron-specific protein family member 1-like // --- //  | LOC100069677 | Cluster0008 |
| 15069988 | ENSECAT00000026008 // LOC100070367 // DNA replication complex GINS protein PSF2-like // | LOC100070367 | Cluster0008 |
| 15049824 | ENSECAT00000002327 // LOC100070483 // uncharacterized protein C9orf117-like // --- // 1 | LOC100070483 | Cluster0008 |
| 15049643 | XM_001500624 // LOC100070953 // WD repeat-containing protein 38-like // --- // 10007095 | LOC100070953 | Cluster0008 |
| 15017810 | ENSECAT00000024937 // LOC100071592 // uncharacterized LOC100071592 // --- // 100071592  | LOC100071592 | Cluster0008 |
| 15023570 | XM_001501686 // LOC100071833 // group IIF secretory phospholipase A2-like // --- // 100 | LOC100071833 | Cluster0008 |
| 14947701 | XM_001501763 // LOC100071911 // olfactory receptor 4F21-like // --- // 100071911 // EN  | LOC100071911 | Cluster0008 |
| 15061494 | ENSECAT00000006299 // LOC100146571 // uncharacterized protein KIAA1644-like // --- // 1 | LOC100146571 | Cluster0008 |
| 15038836 | ENSECAT00000021544 // LOC100147373 // baculoviral IAP repeat-containing protein 7-like  | LOC100147373 | Cluster0008 |
| 15021566 | ENSECAT00000027027 // LOC100629771 // uncharacterized protein C1orf185 homolog // --- / | LOC100629771 | Cluster0008 |
| 14935553 | ENSECAT00000025810 // LOC100629985 // putative protein FAM170B-like // --- // 100629985 | LOC100629985 | Cluster0008 |
| 15079505 | ENSECAT00000010780 // LOC100630088 // uncharacterized protein C7orf34-like // --- // 10 | LOC100630088 | Cluster0008 |
| 14979009 | XM_003362728 // LOC100630155 // alpha-hemoglobin-stabilizing protein-like // --- // 100 | LOC100630155 | Cluster0008 |
| 15037856 | ENSECAT00000021125 // LOC100630181 // adipogenin-like // --- // 100630181 // XM_003363  | LOC100630181 | Cluster0008 |
| 15034697 | ENSECAT00000016492 // LOC100630452 // transmembrane protein 221-like // --- // 10063045 | LOC100630452 | Cluster0008 |
| 15049119 | ENSECAT00000028924 // LOC100630682 // a-kinase anchor protein 2-like // --- // 10063068 | LOC100630682 | Cluster0008 |
| 14966321 | ENSECAT00000015023 // LOC100630693 // ankyrin repeat domain-containing protein 40-like  | LOC100630693 | Cluster0008 |
| 14950666 | ENSECAT00000001234 // MARK4 // MAP/microtubule affinity-regulating kinase 4 // --- // 1 | MARK4        | Cluster0008 |
| 15011522 | NR_032969 // MIR551B // microRNA mir-551b // --- // 100314879                           | MIR551B      | Cluster0008 |
| 15104929 | ENSECAT00000020665 // NLRX1 // NLR family member X1 // --- // 100071383 // XM_00150112  | NLRX1        | Cluster0008 |
| 15051103 | ENSECAT00000020347 // NOXA1 // NADPH oxidase activator 1 // --- // ---                  | NOXA1        | Cluster0008 |
| 15102323 | ENSECAT00000022450 // NPFF // neuropeptide FF-amide peptide precursor // --- // ---     | NPFF         | Cluster0008 |
| 15003537 | ENSECAT00000018280 // PCDH17 // protocadherin 17 // --- // 100051691 // XM_001493601 /  | PCDH17       | Cluster0008 |
| 15133788 | ENSECAT00000026169 // PDZD4 // PDZ domain containing 4 // --- // 100057848 // XM_00149  | PDZD4        | Cluster0008 |
| 14982444 | ENSECAT00000026302 // PLAC8L1 // PLAC8-like 1 // --- // 100071986 // XM_001501837 // P  | PLAC8L1      | Cluster0008 |
| 15036799 | XM_001494638 // PROKR2 // prokineticin receptor 2 // --- // 100052008 // ENSECAT000000  | PROKR2       | Cluster0008 |
| 14997779 | XM_001494698 // RFTN1 // raftlin, lipid raft linker 1 // --- // 100063495 // ENSECAT00  | RFTN1        | Cluster0008 |

|          |                                                                                         |          |             |
|----------|-----------------------------------------------------------------------------------------|----------|-------------|
| 14973881 | XM_001916875 // RIN1 // Ras and Rab interactor 1 // --- // 100058267 /// ENSECAT0000001 | RIN1     | Cluster0008 |
| 15093996 | ENSECAT00000011597 // RUFY4 // RUN and FYVE domain containing 4 // --- // ---           | RUFY4    | Cluster0008 |
| 14973175 | ENSECAT00000011722 // SCGB1A1 // secretoglobin, family 1A, member 1 (uteroglobin) // -- | SCGB1A1  | Cluster0008 |
| 15125265 | ENSECAT00000021756 // SLC39A4 // solute carrier family 39 (zinc transporter), member 4  | SLC39A4  | Cluster0008 |
| 15095397 | XM_001492793 // SLC6A13 // solute carrier family 6 (neurotransmitter transporter, GABA) | SLC6A13  | Cluster0008 |
| 14963727 | XM_001918214 // SREBF1 // sterol regulatory element binding transcription factor 1 // - | SREBF1   | Cluster0008 |
| 15130439 | ENSECAT00000015801 // SRPK3 // SRSF protein kinase 3 // --- // 100057808 /// XM_0014932 | SRPK3    | Cluster0008 |
| 14978604 | ENSECAT00000028907 // SRRM3 // serine/arginine repetitive matrix 3 // --- // --- /// EN | SRRM3    | Cluster0008 |
| 14943254 | EF032140 // TACR2 // tachykinin receptor 2 // --- // 100034168                          | TACR2    | Cluster0008 |
| 14985217 | ENSECAT00000015347 // TCOF1 // Treacher Collins-Franceschetti syndrome 1 // --- // 1000 | TCOF1    | Cluster0008 |
| 15095022 | XM_001916026 // TRAF3IP1 // TNF receptor-associated factor 3 interacting protein 1 // - | TRAF3IP1 | Cluster0008 |
| 15059454 | ENSECAT00000011631 // WBP2NL // WBP2 N-terminal like // --- // ---                      | WBP2NL   | Cluster0008 |
| 14965298 | XM_001487899 // WNT3 // wingless-type MMTV integration site family, member 3 // --- //  | WNT3     | Cluster0008 |
| 15131585 | ENSECAT00000022390 // ZNF182 // zinc finger protein 182 // --- // 100061541 /// XM_0019 | ZNF182   | Cluster0008 |
| 15027253 | XM_003363748 // ZSCAN16 // zinc finger and SCAN domain containing 16 // --- // 10062913 | ZSCAN16  | Cluster0008 |
| 14925125 | ---                                                                                     |          | Cluster0015 |
| 14926597 | ---                                                                                     |          | Cluster0015 |
| 14928247 | ---                                                                                     |          | Cluster0015 |
| 14928639 | ---                                                                                     |          | Cluster0015 |
| 14930197 | ---                                                                                     |          | Cluster0015 |
| 14931351 | ---                                                                                     |          | Cluster0015 |
| 14932293 | ---                                                                                     |          | Cluster0015 |
| 14945595 | ---                                                                                     |          | Cluster0015 |
| 14948504 | ---                                                                                     |          | Cluster0015 |
| 14948604 | ---                                                                                     |          | Cluster0015 |
| 14968552 | ---                                                                                     |          | Cluster0015 |
| 14972192 | ---                                                                                     |          | Cluster0015 |
| 14981809 | ---                                                                                     |          | Cluster0015 |
| 14984072 | ---                                                                                     |          | Cluster0015 |
| 14986928 | ---                                                                                     |          | Cluster0015 |
| 14991173 | ---                                                                                     |          | Cluster0015 |
| 14991419 | ---                                                                                     |          | Cluster0015 |
| 14992879 | ---                                                                                     |          | Cluster0015 |
| 14997530 | ---                                                                                     |          | Cluster0015 |
| 15006329 | ---                                                                                     |          | Cluster0015 |
| 15008985 | ---                                                                                     |          | Cluster0015 |
| 15017465 | ---                                                                                     |          | Cluster0015 |
| 15020483 | ---                                                                                     |          | Cluster0015 |
| 15026550 | ---                                                                                     |          | Cluster0015 |

|          |     |             |
|----------|-----|-------------|
| 15036400 | --- | Cluster0015 |
| 15042918 | --- | Cluster0015 |
| 15054822 | --- | Cluster0015 |
| 15055631 | --- | Cluster0015 |
| 15057838 | --- | Cluster0015 |
| 15070812 | --- | Cluster0015 |
| 15071285 | --- | Cluster0015 |
| 15072142 | --- | Cluster0015 |
| 15077385 | --- | Cluster0015 |
| 15083454 | --- | Cluster0015 |
| 15089956 | --- | Cluster0015 |
| 15094485 | --- | Cluster0015 |
| 15110907 | --- | Cluster0015 |
| 15115811 | --- | Cluster0015 |
| 15118658 | --- | Cluster0015 |
| 15128304 | --- | Cluster0015 |
| 15128306 | --- | Cluster0015 |
| 15128843 | --- | Cluster0015 |
| 15130282 | --- | Cluster0015 |
| 15130792 | --- | Cluster0015 |
| 15132104 | --- | Cluster0015 |
| 15132227 | --- | Cluster0015 |
| 15134011 | --- | Cluster0015 |
| 15134384 | --- | Cluster0015 |
| 15136270 | --- | Cluster0015 |
| 15136274 | --- | Cluster0015 |
| 15136312 | --- | Cluster0015 |
| 15136360 | --- | Cluster0015 |
| 15136636 | --- | Cluster0015 |
| 15136666 | --- | Cluster0015 |
| 15136702 | --- | Cluster0015 |
| 15136842 | --- | Cluster0015 |
| 15136930 | --- | Cluster0015 |
| 15137008 | --- | Cluster0015 |
| 15137194 | --- | Cluster0015 |
| 15137280 | --- | Cluster0015 |
| 15137396 | --- | Cluster0015 |
| 15137488 | --- | Cluster0015 |
| 15137560 | --- | Cluster0015 |

|          |                                                                                          |              |             |
|----------|------------------------------------------------------------------------------------------|--------------|-------------|
| 15137626 | ---                                                                                      |              | Cluster0015 |
| 15137740 | ---                                                                                      |              | Cluster0015 |
| 14981953 | ENSECAT00000019198 // ADAM19 // ADAM metallopeptidase domain 19 // --- // ---            | ADAM19       | Cluster0015 |
| 15113406 | NM_001081897 // ADORA2A // adenosine A2a receptor // --- // 100034039 /// ENSECAT000000  | ADORA2A      | Cluster0015 |
| 14962731 | XM_001502998 // ALOX12 // arachidonate 12-lipoxygenase // --- // 100072916 /// ENSECAT0  | ALOX12       | Cluster0015 |
| 15107741 | XM_001504918 // AMPD3 // adenosine monophosphate deaminase 3 // --- // 100055812 /// EN  | AMPD3        | Cluster0015 |
| 15066646 | ENSECAT00000019611 // ANTXR2 // anthrax toxin receptor 2 // --- // 100051770 /// XM_001  | ANTXR2       | Cluster0015 |
| 15096376 | ENSECAT00000010436 // ARNTL2 // aryl hydrocarbon receptor nuclear translocator-like 2 /  | ARNTL2       | Cluster0015 |
| 15120425 | ENSECAT00000022867 // ATP8B1 // ATPase, aminophospholipid transporter, class I, type 8B  | ATP8B1       | Cluster0015 |
| 15062906 | ENSECAT00000010920 // CCNY // cyclin Y // --- // ---                                     | CCNY         | Cluster0015 |
| 15036423 | XM_001488842 // CD93 // CD93 molecule // --- // 100059201 /// ENSECAT00000017144 // CD9  | CD93         | Cluster0015 |
| 14997111 | ENSECAT00000027151 // CDCP1 // CUB domain containing protein 1 // --- // 100065703 ///   | CDCP1        | Cluster0015 |
| 14945170 | XM_001490809 // CHSY1 // chondroitin sulfate synthase 1 // --- // 100057477 /// ENSECAT  | CHSY1        | Cluster0015 |
| 15007756 | ENSECAT00000026771 // COL3A1 // collagen, type III, alpha 1 // --- // 100034123          | COL3A1       | Cluster0015 |
| 15094905 | NM_001257078 // CXCR7 // chemokine (C-X-C motif) receptor 7 // --- // 100057501 /// ENS  | CXCR7        | Cluster0015 |
| 15100585 | ENSECAT00000017390 // DUSP16 // dual specificity phosphatase 16 // --- // ---            | DUSP16       | Cluster0015 |
| 14998235 | ENSECAT00000020481 // ESYT3 // extended synaptotagmin-like protein 3 // --- // 10005187  | ESYT3        | Cluster0015 |
| 15026036 | ENSECAT00000015464 // FGF2 // fibroblast growth factor 2 (basic) // --- // 100033955 //  | FGF2         | Cluster0015 |
| 15108307 | ENSECAT00000020310 // FSHB // follicle stimulating hormone, beta polypeptide // --- //   | FSHB         | Cluster0015 |
| 15025773 | XM_001915633 // GAB1 // GRB2-associated binding protein 1 // --- // 100062924 /// ENSEC  | GAB1         | Cluster0015 |
| 15124436 | ENSECAT00000022529 // HAS2 // hyaluronan synthase 2 // --- // 100009708 /// NM_00108180  | HAS2         | Cluster0015 |
| 14999007 | NM_001081919 // HRH1 // histamine receptor H1 // --- // 100034110 /// ENSECAT00000000441 | HRH1         | Cluster0015 |
| 14955834 | ENSECAT00000015199 // IL11 // interleukin 11 // --- // ---                               | IL11         | Cluster0015 |
| 14979496 | NM_001081774 // IL4R // interleukin 4 receptor // --- // 791252 /// ENSECAT00000023156   | IL4R         | Cluster0015 |
| 14957143 | ENSECAT00000020501 // LAMA4 // laminin, alpha 4 // --- // 100066875                      | LAMA4        | Cluster0015 |
| 15073176 | XM_001488715 // LBR // lamin B receptor // --- // 100056997 /// ENSECAT00000011831 // L  | LBR          | Cluster0015 |
| 15117594 | ENSECAT00000010307 // LIMK2 // LIM domain kinase 2 // --- // 100058419 /// XM_001497153  | LIMK2        | Cluster0015 |
| 15116468 | ENSECAT00000016251 // LIPG // lipase, endothelial // --- // 100053762 /// XM_001499159   | LIPG         | Cluster0015 |
| 15085901 | ENSECAT00000025464 // LOC100054450 // CD5 antigen-like // --- // 100054450 /// XM_00148  | LOC100054450 | Cluster0015 |
| 15045827 | XM_001489223 // LOC100054699 // b1 bradykinin receptor-like // --- // 100054699 /// ENS  | LOC100054699 | Cluster0015 |
| 15071089 | ENSECAT00000013150 // LOC100055973 // platelet basic protein-like // --- // 100055973 /  | LOC100055973 | Cluster0015 |
| 15014240 | XM_001498883 // LOC100059313 // insulin-like growth factor 2 mRNA-binding protein 2-lik  | LOC100059313 | Cluster0015 |
| 15054124 | ENSECAT00000022937 // LOC100059969 // protein C-ets-2-like // --- // 100059969 /// XM_0  | LOC100059969 | Cluster0015 |
| 14970224 | XM_001493378 // LOC100061443 // membrane-spanning 4-domains subfamily A member 7-like /  | LOC100061443 | Cluster0015 |
| 14989256 | ENSECAT00000009642 // LOC100061844 // CB1 cannabinoid receptor-interacting protein 1-li  | LOC100061844 | Cluster0015 |
| 15026012 | ENSECAT00000014299 // LOC100063739 // protein sprouty homolog 1-like // --- // 10006373  | LOC100063739 | Cluster0015 |
| 15111950 | XM_001917453 // LOC100065672 // tumor necrosis factor receptor superfamily member 19L-1  | LOC100065672 | Cluster0015 |
| 15039475 | ENSECAT00000012970 // LOC100065724 // phosphatidate cytidylyltransferase 2-like // ---   | LOC100065724 | Cluster0015 |
| 14950850 | XM_001503145 // LOC100065997 // c5a anaphylatoxin chemotactic receptor-like // --- // 1  | LOC100065997 | Cluster0015 |



|          |                                                                                          |              |             |
|----------|------------------------------------------------------------------------------------------|--------------|-------------|
| 14949069 | XM_001497325 // LOC100067227 // nidogen-2-like // --- // 100067227 /// ENSECAT000000166  | LOC100067227 | Cluster0015 |
| 15054811 | XM_001498489 // LOC100068667 // SAM domain-containing protein SAMSN-1-like // --- // 10  | LOC100068667 | Cluster0015 |
| 14939007 | ENSECAT00000018492 // LOC100071046 // EH domain-containing protein 4-like // --- // 100  | LOC100071046 | Cluster0015 |
| 14939556 | XM_001502449 // LOC100072499 // olfactory receptor 11G2-like // --- // 100072499 /// EN  | LOC100072499 | Cluster0015 |
| 15060231 | XM_003364322 // LOC100629230 // protein BTG1-like // --- // 100629230 /// ENSECAT000000  | LOC100629230 | Cluster0015 |
| 14982656 | ENSECAT00000010964 // LOC100629956 // uncharacterized LOC100629956 // --- // 100629956   | LOC100629956 | Cluster0015 |
| 15046132 | NR_033010 // MIR329 // microRNA mir-329 // --- // 100314901                              | MIR329       | Cluster0015 |
| 15109357 | ENSECAT00000025715 // MMP1 // matrix metalloproteinase 1 (interstitial collagenase) // - | MMP1         | Cluster0015 |
| 15071545 | ENSECAT00000020434 // PDGFRA // platelet-derived growth factor receptor, alpha polypept  | PDGFRA       | Cluster0015 |
| 15026827 | ENSECAT00000015816 // PHACTR1 // phosphatase and actin regulator 1 // --- // 100051555   | PHACTR1      | Cluster0015 |
| 15119273 | XM_001489455 // PPP4R1 // protein phosphatase 4, regulatory subunit 1 // --- // 1000551  | PPP4R1       | Cluster0015 |
| 14974966 | XM_001489025 // PRKAR1B // protein kinase, cAMP-dependent, regulatory, type I, beta //   | PRKAR1B      | Cluster0015 |
| 15000297 | ENSECAT00000008682 // SEMA3F // sema domain, immunoglobulin domain (Ig), short basic do  | SEMA3F       | Cluster0015 |
| 15131031 | ENSECAT00000019477 // SH3KBP1 // SH3-domain kinase binding protein 1 // --- // 10005864  | SH3KBP1      | Cluster0015 |
| 15016558 | NM_001163971 // SLC2A1 // solute carrier family 2 (facilitated glucose transporter), me  | SLC2A1       | Cluster0015 |
| 15039491 | ENSECAT00000006399 // SMOX // spermine oxidase // --- // 100052311 /// XM_001495439 //   | SMOX         | Cluster0015 |
| 15124307 | XM_001496042 // TRPS1 // trichorhinophalangeal syndrome I // --- // 100056821 /// ENSEC  | TRPS1        | Cluster0015 |
| 15049266 | ENSECAT00000021954 // ZNF618 // zinc finger protein 618 // --- // 100051828              | ZNF618       | Cluster0015 |
| 14925019 | ---                                                                                      |              | Cluster0017 |
| 14925527 | ---                                                                                      |              | Cluster0017 |
| 14925923 | ---                                                                                      |              | Cluster0017 |
| 14926359 | ---                                                                                      |              | Cluster0017 |
| 14926383 | ---                                                                                      |              | Cluster0017 |
| 14926553 | ---                                                                                      |              | Cluster0017 |
| 14926625 | ---                                                                                      |              | Cluster0017 |
| 14926861 | ---                                                                                      |              | Cluster0017 |
| 14927043 | ---                                                                                      |              | Cluster0017 |
| 14927189 | ---                                                                                      |              | Cluster0017 |
| 14927221 | ---                                                                                      |              | Cluster0017 |
| 14927235 | ---                                                                                      |              | Cluster0017 |
| 14927239 | ---                                                                                      |              | Cluster0017 |
| 14927243 | ---                                                                                      |              | Cluster0017 |
| 14927851 | ---                                                                                      |              | Cluster0017 |
| 14928035 | ---                                                                                      |              | Cluster0017 |
| 14928051 | ---                                                                                      |              | Cluster0017 |
| 14928239 | ---                                                                                      |              | Cluster0017 |
| 14928337 | ---                                                                                      |              | Cluster0017 |
| 14928425 | ---                                                                                      |              | Cluster0017 |
| 14928787 | ---                                                                                      |              | Cluster0017 |

|          |     |             |
|----------|-----|-------------|
| 14928841 | --- | Cluster0017 |
| 14929249 | --- | Cluster0017 |
| 14929303 | --- | Cluster0017 |
| 14929327 | --- | Cluster0017 |
| 14929365 | --- | Cluster0017 |
| 14929393 | --- | Cluster0017 |
| 14929403 | --- | Cluster0017 |
| 14929803 | --- | Cluster0017 |
| 14930451 | --- | Cluster0017 |
| 14930985 | --- | Cluster0017 |
| 14931223 | --- | Cluster0017 |
| 14931265 | --- | Cluster0017 |
| 14931293 | --- | Cluster0017 |
| 14931929 | --- | Cluster0017 |
| 14931957 | --- | Cluster0017 |
| 14932229 | --- | Cluster0017 |
| 14951716 | --- | Cluster0017 |
| 14955826 | --- | Cluster0017 |
| 14974089 | --- | Cluster0017 |
| 14978302 | --- | Cluster0017 |
| 14995241 | --- | Cluster0017 |
| 14998291 | --- | Cluster0017 |
| 15011672 | --- | Cluster0017 |
| 15021478 | --- | Cluster0017 |
| 15042666 | --- | Cluster0017 |
| 15079582 | --- | Cluster0017 |
| 15104229 | --- | Cluster0017 |
| 15116922 | --- | Cluster0017 |
| 15117450 | --- | Cluster0017 |
| 15120348 | --- | Cluster0017 |
| 15125810 | --- | Cluster0017 |
| 15134782 | --- | Cluster0017 |
| 15135992 | --- | Cluster0017 |
| 15136220 | --- | Cluster0017 |
| 15136328 | --- | Cluster0017 |
| 15136490 | --- | Cluster0017 |
| 15136506 | --- | Cluster0017 |
| 15136638 | --- | Cluster0017 |
| 15136870 | --- | Cluster0017 |

|          |                                                                                         |              |             |
|----------|-----------------------------------------------------------------------------------------|--------------|-------------|
| 15137082 | ---                                                                                     |              | Cluster0017 |
| 15137290 | ---                                                                                     |              | Cluster0017 |
| 15137554 | ---                                                                                     |              | Cluster0017 |
| 15059443 | XM_001500428 // SEPT3 // septin 3 // --- // 100070757 /// ENSECAT00000025376 // SEPT3 / | SEPT3        | Cluster0017 |
| 14950769 | ENSECAT00000022180 // HIF3A // hypoxia inducible factor 3, alpha subunit // --- // ---  | HIF3A        | Cluster0017 |
| 15042278 | NM_001099441 // IFNA1 // interferon-alpha-1 // --- // 100053022 /// ENSECAT00000006710  | IFNA1        | Cluster0017 |
| 14988276 | XM_001493078 // LOC100051611 // dual specificity protein phosphatase 2-like // --- // 1 | LOC100051611 | Cluster0017 |
| 14960527 | ENSECAT00000006708 // LOC100054466 // nuclear receptor subfamily 1 group D member 1-lik | LOC100054466 | Cluster0017 |
| 15071034 | ENSECAT00000016451 // LOC100057498 // uncharacterized protein C4orf26-like // --- // 10 | LOC100057498 | Cluster0017 |
| 15055465 | XM_001491141 // LOC100058018 // trefoil factor 3-like // --- // 100058018 /// ENSECAT00 | LOC100058018 | Cluster0017 |
| 15103454 | XM_001493821 // LOC100059768 // growth arrest and DNA damage-inducible protein GADD45 b | LOC100059768 | Cluster0017 |
| 14944560 | XM_001496642 // LOC100066341 // pulmonary surfactant-associated protein D-like // --- / | LOC100066341 | Cluster0017 |
| 14979434 | XM_001496643 // LOC100066345 // uncharacterized LOC100066345 // --- // 100066345 /// EN | LOC100066345 | Cluster0017 |
| 15110507 | ENSECAT00000014904 // LOC100072682 // A disintegrin and metalloproteinase with thrombos | LOC100072682 | Cluster0017 |
| 14939908 | ENSECAT00000016954 // LOC100072799 // uncharacterized LOC100072799 // --- // 100072799  | LOC100072799 | Cluster0017 |
| 15128153 | ENSECAT00000019935 // LOC100146280 // zinc finger X-linked protein ZXDB-like // --- //  | LOC100146280 | Cluster0017 |
| 15065731 | ENSECAT00000021303 // LOC100146434 // forkhead box protein F1-like // --- // 100146434  | LOC100146434 | Cluster0017 |
| 14944421 | ENSECAT00000028834 // LOC100629593 // protein FAM25-like // --- // 100629593 /// XM_003 | LOC100629593 | Cluster0017 |
| 15038111 | ENSECAT00000024818 // PABPC1L // poly(A) binding protein, cytoplasmic 1-like // --- //  | PABPC1L      | Cluster0017 |
| 14954403 | ENSECAT00000010452 // PHLDB3 // pleckstrin homology-like domain, family B, member 3 //  | PHLDB3       | Cluster0017 |
| 15094022 | XM_003365130 // PNKD // paroxysmal nonkinesigenic dyskinesia // --- // 100055676 /// EN | PNKD         | Cluster0017 |
| 15064119 | ENSECAT00000012436 // SLC6A2 // solute carrier family 6 (neurotransmitter transporter,  | SLC6A2       | Cluster0017 |
| 15079841 | ENSECAT00000017296 // ZNF775 // zinc finger protein 775 // --- // --- /// ENSECAT000000 | ZNF775       | Cluster0017 |
| 14926283 | ---                                                                                     |              | Cluster0025 |
| 14927677 | ---                                                                                     |              | Cluster0025 |
| 14927693 | ---                                                                                     |              | Cluster0025 |
| 14927823 | ---                                                                                     |              | Cluster0025 |
| 14928059 | ---                                                                                     |              | Cluster0025 |
| 14928101 | ---                                                                                     |              | Cluster0025 |
| 14928255 | ---                                                                                     |              | Cluster0025 |
| 14929341 | ---                                                                                     |              | Cluster0025 |
| 14931611 | ---                                                                                     |              | Cluster0025 |
| 14938479 | ---                                                                                     |              | Cluster0025 |
| 14946671 | ---                                                                                     |              | Cluster0025 |
| 14951437 | ---                                                                                     |              | Cluster0025 |
| 14953136 | ---                                                                                     |              | Cluster0025 |
| 14967562 | ---                                                                                     |              | Cluster0025 |
| 14983568 | ---                                                                                     |              | Cluster0025 |
| 14994501 | ---                                                                                     |              | Cluster0025 |

|          |                                                                                         |              |             |
|----------|-----------------------------------------------------------------------------------------|--------------|-------------|
| 15020815 | ---                                                                                     |              | Cluster0025 |
| 15021315 | ---                                                                                     |              | Cluster0025 |
| 15048559 | ---                                                                                     |              | Cluster0025 |
| 15057681 | ---                                                                                     |              | Cluster0025 |
| 15090711 | ---                                                                                     |              | Cluster0025 |
| 15091814 | ---                                                                                     |              | Cluster0025 |
| 15108333 | ---                                                                                     |              | Cluster0025 |
| 15111259 | ---                                                                                     |              | Cluster0025 |
| 15115246 | ---                                                                                     |              | Cluster0025 |
| 15117474 | ---                                                                                     |              | Cluster0025 |
| 15121773 | ---                                                                                     |              | Cluster0025 |
| 15123566 | ---                                                                                     |              | Cluster0025 |
| 15124138 | ---                                                                                     |              | Cluster0025 |
| 15132332 | ---                                                                                     |              | Cluster0025 |
| 15134392 | ---                                                                                     |              | Cluster0025 |
| 15134788 | ---                                                                                     |              | Cluster0025 |
| 15135268 | ---                                                                                     |              | Cluster0025 |
| 15135562 | ---                                                                                     |              | Cluster0025 |
| 15136204 | ---                                                                                     |              | Cluster0025 |
| 15137132 | ---                                                                                     |              | Cluster0025 |
| 15137404 | ---                                                                                     |              | Cluster0025 |
| 15137616 | ---                                                                                     |              | Cluster0025 |
| 15137878 | ---                                                                                     |              | Cluster0025 |
| 15137880 | ---                                                                                     |              | Cluster0025 |
| 15137884 | ---                                                                                     |              | Cluster0025 |
| 14941218 | ENSECAT00000020695 // DMBT1 // deleted in malignant brain tumors 1 // --- // ---        | DMBT1        | Cluster0025 |
| 15091762 | ENSECAT00000025249 // GNRHR2 // gonadotropin-releasing hormone (type 2) receptor 2 // - | GNRHR2       | Cluster0025 |
| 15079580 | XM_001490205 // LOC100056474 // taste receptor type 2 member 134-like // --- // 1000564 | LOC100056474 | Cluster0025 |
| 14955433 | ENSECAT00000026777 // LOC100066668 // myeloid cell surface antigen CD33-like // --- //  | LOC100066668 | Cluster0025 |
| 15110298 | ENSECAT00000022178 // LOC100072289 // roundabout homolog 4-like // --- // 100072289     | LOC100072289 | Cluster0025 |
| 15062888 | ENSECAT00000004118 // LOC100146765 // olfactory receptor 2T33-like // --- // 100146765  | LOC100146765 | Cluster0025 |
| 14939921 | ENSECAT00000019167 // LOC100630099 // uncharacterized LOC100630099 // --- // 100630099  | LOC100630099 | Cluster0025 |
| 15091066 | NR_032839 // MIR1905B // microRNA mir-1905b // --- // 100315113                         | MIR1905B     | Cluster0025 |
| 15027400 | ENSECAT00000025255 // TRIM40 // tripartite motif containing 40 // --- // ---            | TRIM40       | Cluster0025 |
| 14952029 | ENSECAT00000020392 // ZNF671 // zinc finger protein 671 // --- // ---                   | ZNF671       | Cluster0025 |
