# Supplementary material for: Comparative transcriptome analysis of equine alveolar macrophages
Source: PubMed Central journal article supplement (PMC5412682; doi:10.1111/evj.12584), 2016-07-09
Supplement: EVJ-49-375-s004.pdf [file EVJ-49-375-s004.pdf]

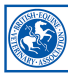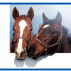

## Supplementary Item 1d: Genelist of 5279 transcripts differentially expressed between AMs and PMs - with p adjusted value &lt;0.05 and fold change &gt;2

| Transcript ID | Gene_assignment                                                                                                  | Gene_Symbol  | p-value | Fold-Change |
|---------------|------------------------------------------------------------------------------------------------------------------|--------------|---------|-------------|
| 15121321      | ENSECAT00000013628 // LOC100052888 // cholesterol 7-alpha-monooxygenase-like // --- //                           | LOC100052888 | <0.05   | 49.5489     |
| 15080122      | XM_001487907 // LOC100049847 // platelet glycoprotein 4-like // --- // 100049847 // EN                           | LOC100049847 | <0.05   | 38.3266     |
| 15100171      | ENSECAT00000020379 // CD163 // CD163 molecule // --- // ---                                                      | CD163        | <0.05   | 28.0566     |
| 15077957      | ENSECAT00000001905 // GPNMB // glycoprotein (transmembrane) nmb // --- // 100067870 //                           | GPNMB        | <0.05   | 27.0716     |
| 15066795      | XM_001916447 // LOC100057831 // n-acyl ethanolamine-hydrolyzing amidase-like // ---                              | LOC100057831 | <0.05   | 25.7024     |
| 14972893      | NM_001257155 // MPEG1 // macrophage expressed 1 // --- // 100066669 // ENSECAT000000001                          | MPEG1        | <0.05   | 24.8713     |
| 15088442      | ENSECAT00000011655 // MCOLN2 // mucopolin 2 // --- // 100052719 // XM_001496833 // MCO                           | MCOLN2       | <0.05   | 21.8081     |
| 15126979      | NM_001111301 // TLR8 // toll-like receptor 8 // --- // 100054367 // ENSECAT00000009327                           | TLR8         | <0.05   | 20.9228     |
| 14934085      | XM_001502962 // LIPA // lipase A, lysosomal acid, cholesterol esterase // --- // 100071                          | LIPA         | <0.05   | 18.7798     |
| 14966871      | ---                                                                                                              | ---          | <0.05   | 17.1072     |
| 15134514      | ---                                                                                                              | ---          | <0.05   | 16.2329     |
| 15040529      | ENSECAT00000021279 // PLTP // phospholipid transfer protein // --- // 100056507 // XM_                           | PLTP         | <0.05   | 15.2925     |
| 15051976      | ENSECAT00000005057 // PTGR1 // prostaglandin reductase 1 // --- // ---                                           | PTGR1        | <0.05   | 14.2633     |
| 15023455      | XM_001501495 // LOC100071667 // complement C1q subcomponent subunit B-like // --- // 10                          | LOC100071667 | <0.05   | 14.0384     |
| 14958998      | ENSECAT00000007910 // ABCA6 // ATP-binding cassette, sub-family A (ABC1), member 6 // -                          | ABCA6        | <0.05   | 13.7175     |
| 15098294      | XM_001494130 // LOC100052143 // lysozyme C-like // --- // 100052143 // ENSECAT000000019                          | LOC100052143 | <0.05   | 13.1031     |
| 14933958      | ENSECAT00000020082 // MYOF // myoferlin // --- // ---                                                            | MYOF         | <0.05   | 11.7761     |
| 15100625      | ENSECAT00000015675 // PLBD1 // phospholipase B domain containing 1 // --- // 100066968                           | PLBD1        | <0.05   | 11.7085     |
| 15106728      | XM_001917218 // PRCP // prolycarboxypeptidase (angiotensinase C) // --- // 100061830 //                          | PRCP         | <0.05   | 11.5189     |
| 15063383      | XM_001497471 // MRC1 // mannose receptor, C type 1 // --- // 100068247 // ENSECAT000000                          | MRC1         | <0.05   | 11.1187     |
| 15033029      | XM_001491667 // CD180 // CD180 molecule // --- // 100056598 // ENSECAT00000018322 // C                           | CD180        | <0.05   | 11.0961     |
| 14967730      | ---                                                                                                              | ---          | <0.05   | 11.0516     |
| 15053235      | ENSECAT00000000831 // LOC100069029 // ficolin-1-like // --- // 100069029 // XM_0014988                           | LOC100069029 | <0.05   | 11.0335     |
| 14943095      | ENSECAT00000011152 // EGR2 // early growth response 2 // --- // 100062890 // XM_001503                           | EGR2         | <0.05   | 10.7066     |
| 15023462      | XM_001504261 // LOC100058097 // complement C1q subcomponent subunit A-like // --- // 10                          | LOC100058097 | <0.05   | 10.5162     |
| 15089727      | XM_001489794 // LOC100055750 // retinoic acid receptor responder protein 1-like // ---                           | LOC100055750 | <0.05   | 10.417      |
| 15123100      | XM_001489456 // LOC100057538 // fatty acid-binding protein, epidermal-like // --- // 10                          | LOC100057538 | <0.05   | 10.2741     |
| 15096737      | XM_001490287 // LOC100056613 // heme transporter HRG1-like // --- // 100056613 // ENSE                           | LOC100056613 | <0.05   | 10.0751     |
| 14969419      | XM_001914718 // LOC100060647 // catalase-like // --- // 100060647 // ENSECAT0000002124                           | LOC100060647 | <0.05   | 9.51748     |
| 14989278      | ---                                                                                                              | ---          | <0.05   | 9.5015      |
| 15015651      | XM_001488028 // LOC100049896 // lipid phosphate phosphohydrolase 3-like // --- // 10004                          | LOC100049896 | <0.05   | 9.48814     |
| 15126635      | ---                                                                                                              | ---          | <0.05   | 9.37799     |
| 15023458      | XM_001504258 // LOC100058056 // complement C1q subcomponent subunit C-like // --- // 10                          | LOC100058056 | <0.05   | 9.32528     |
| 15031833      | ENSECAT00000012639 // ENPP5 // ectonucleotide pyrophosphatase/phosphodiesterase 5 (puta                          | ENPP5        | <0.05   | 9.27836     |
| 14962629      | XM_003362509 // LOC100629451 // uncharacterized LOC100629451 // --- // 100629451 // EN                           | LOC100629451 | <0.05   | 9.19226     |
| 14952073      | ---                                                                                                              | ---          | <0.05   | 9.12197     |
| 14955644      | NM_001083593 // ILT11A // immunoglobulin-like transcript 11 A // 10p12 // 100036551 //                           | ILT11A       | <0.05   | 9.09651     |
| 15044308      | XM_001495733 // LOC100050367 // galectin-3-like // --- // 100050367 // ENSECAT000000006                          | LOC100050367 | <0.05   | 8.87855     |
| 14994472      | XM_001502263 // LOC100072348 // P9-loop repeat-containing protein 3-like // --- // 1000                          | LOC100072348 | <0.05   | 8.75719     |
| 15066585      | ENSECAT00000019091 // LOC100051954 // transmembrane protein 150C-like // --- // 1000519                          | LOC100051954 | <0.05   | 8.75065     |
| 14942824      | ENSECAT00000010526 // LOC100071611 // interferon-induced protein with tetratricopeptide                          | LOC100071611 | <0.05   | 8.67969     |
| 15029938      | ENSECAT00000014629 // MBOAT1 // membrane bound O-acyltransferase domain containing 1 //                          | MBOAT1       | <0.05   | 8.57184     |
| 15082071      | XM_001500152 // CPVL // carboxypeptidase, vitellogenic-like // --- // 100069591 // ENS                           | CPVL         | <0.05   | 8.56527     |
| 14948606      | ENSECAT00000005524 // LOC100056635 // egl nine homolog 3-like // --- // 100056635 // X                           | LOC100056635 | <0.05   | 8.50285     |
| 15057858      | XM_001914713 // LOC100058283 // glioma pathogenesis-related protein 1-like // --- // 10                          | LOC100058283 | <0.05   | 8.45443     |
| 14998968      | ENSECAT00000017857 // LOC100051258 // peroxisome proliferator-activated receptor gamma-                          | LOC100051258 | <0.05   | 8.42217     |
| 15086910      | XM_001490599 // LOC100054991 // cathepsin K-like // --- // 100054991 // ENSECAT000000002                         | LOC100054991 | <0.05   | 8.39858     |
| 15030619      | ---                                                                                                              | ---          | <0.05   | 8.29686     |
| 15003616      | XM_001495367 // KLF5 // Kruppel-like factor 5 (intestinal) // --- // 100052058 // ENSE                           | KLF5         | <0.05   | 8.16746     |
| 15100712      | ENSECAT00000016023 // EPS8 // epidermal growth factor receptor pathway substrate 8 // -                          | EPS8         | <0.05   | 8.11492     |
| 15094354      | ENSECAT00000006171 // LOC100056612 // 2-acylglycerol O-acyltransferase 1-like // --- //                          | LOC100056612 | <0.05   | 8.08387     |
| 15004986      | ---                                                                                                              | ---          | <0.05   | 7.98063     |
| 15123383      | ENSECAT00000023014 // SGK3 // serum/glucocorticoid regulated kinase family, member 3 //                          | SGK3         | <0.05   | 7.905       |
| 14993570      | ENSECAT00000013445 // RASGRP3 // RAS guanyl releasing protein 3 (calcium and DAG-regula                          | RASGRP3      | <0.05   | 7.83859     |
| 14972866      | ENSECAT00000000688 // LPXN // leupaxin // --- // 100066577 // XM_001504694 // LPXN //                            | LPXN         | <0.05   | 7.79321     |
| 15073525      | XM_001915707 // LOC100050843 // regulator of G-protein signaling 18-like // --- // 1000                          | LOC100050843 | <0.05   | 7.7779      |
| 15031855      | ENSECAT00000026880 // LOC100055841 // platelet-activating factor acetylhydrolase-like /                          | LOC100055841 | <0.05   | 7.72283     |
| 15090278      | ENSECAT00000020548 // LOC100056429 // corticosteroid 11-beta-dehydrogenase isozyme 1-ii                          | LOC100056429 | <0.05   | 7.60787     |
| 15042343      | XM_001497806 // ACO1 // aconitase 1, soluble // --- // 100067866 // ENSECAT00000016500                           | ACO1         | <0.05   | 7.59669     |
| 15084195      | EU423855 // ATP1B1 // ATPase, Na <sup>+</sup> /K <sup>+</sup> transporting, beta 1 polypeptide // --- // 1000339 | ATP1B1       | <0.05   | 7.46007     |
| 15053898      | ENSECAT00000015326 // IFNGR2 // interferon gamma receptor 2 (interferon gamma transduce                          | IFNGR2       | <0.05   | 7.40986     |
| 15090570      | ---                                                                                                              | ---          | <0.05   | 7.3002      |
| 14950926      | XM_001488495 // LOC100050794 // epithelial membrane protein 3-like // --- // 100050794                           | LOC100050794 | <0.05   | 7.27585     |
| 15012696      | XM_001500027 // LOC100070376 // integrin beta-5-like // --- // 100070376 // ENSECAT000                           | LOC100070376 | <0.05   | 7.2531      |
| 15124723      | ENSECAT00000025889 // LOC100068961 // src-like-adaptor-like // --- // 100068961 // XM_                           | LOC100068961 | <0.05   | 7.03199     |
| 15090308      | ENSECAT00000017807 // LOC100057656 // uncharacterized LOC100057656 // --- // 100057656                           | LOC100057656 | <0.05   | 6.98994     |
| 15052391      | ENSECAT00000013641 // LOC100071711 // erythrocyte band 7 integral membrane protein-like                          | LOC100071711 | <0.05   | 6.95172     |
| 15029563      | ENSECAT00000010506 // SERPINB1 // serpin peptidase inhibitor, clade B (ovalbumin), memb                          | SERPINB1     | <0.05   | 6.93706     |
| 14950576      | ENSECAT00000008481 // LOC100065481 // uncharacterized LOC100065481 // --- // 100065481                           | LOC100065481 | <0.05   | 6.91512     |
| 15095766      | ENSECAT00000001427 // PTPN6 // protein tyrosine phosphatase, non-receptor type 6 // ---                          | PTPN6        | <0.05   | 6.90845     |
| 15049156      | XM_003364096 // LOC100630493 // uncharacterized LOC100630493 // --- // 100630493 // EN                           | LOC100630493 | <0.05   | 6.8862      |
| 15032447      | ---                                                                                                              | ---          | <0.05   | 6.88201     |
| 14960951      | ---                                                                                                              | ---          | <0.05   | 6.87572     |
| 15053950      | NM_001247992 // SLC5A3 // solute carrier family 5 (sodium/myo-inositol cotransporter),                           | SLC5A3       | <0.05   | 6.85803     |
| 15005180      | ENSECAT00000019998 // LOC100059776 // UPF0124 protein C13orf31-like // --- // 100059776                          | LOC100059776 | <0.05   | 6.84107     |
| 15130005      | AY372182 // HPRT1 // hypoxanthine phosphoribosyltransferase 1 // --- // 100034149                                | HPRT1        | <0.05   | 6.81615     |
| 14937987      | ENSECAT00000018237 // CCPG1 // cell cycle progression 1 // --- // 100069165 // XM_0015                           | CCPG1        | <0.05   | 6.79334     |
| 15113074      | XM_001504976 // LOC100071946 // mas-related G-protein coupled receptor member X3-like /                          | LOC100071946 | <0.05   | 6.74716     |
| 14969432      | ENSECAT00000001357 // LOC100059218 // ETS homologous factor-like // --- // 100059218 //                          | LOC100059218 | <0.05   | 6.72527     |
| 15025388      | XM_001500342 // ETFDH // electron-transferring-flavoprotein dehydrogenase // --- // 100                          | ETFDH        | <0.05   | 6.71192     |
| 14935044      | ---                                                                                                              | ---          | <0.05   | 6.64298     |
| 14997495      | ENSECAT00000013017 // LOC100056371 // beta-galactosidase-like // --- // 100056371 // X                           | LOC100056371 | <0.05   | 6.63372     |
| 15025833      | ENSECAT00000020853 // LOC100063290 // ras-related protein Rar-3B-like // --- // 100063                           | LOC100063290 | <0.05   | 6.62488     |
| 14967714      | ---                                                                                                              | ---          | <0.05   | 6.60566     |
| 14969059      | XM_001503512 // ALDH3A2 // aldehyde dehydrogenase 3 family, member A2 // --- // 1000731                          | ALDH3A2      | <0.05   | 6.58631     |
| 15107920      | XM_001501420 // PDE3B // phosphodiesterase 3B, cGMP-inhibited // --- // 100071615 // E                           | PDE3B        | <0.05   | 6.58313     |
| 14983996      | XM_003362887 // LOC100073268 // arylsulfatase B-like // --- // 100073268 // ENSECAT000                           | LOC100073268 | <0.05   | 6.43424     |
| 14976601      | ENSECAT00000010646 // LOC100050012 // glycerophosphodiester phosphodiesterase 1-like //                          | LOC100050012 | <0.05   | 6.43092     |
| 14999470      | NM_001163874 // MITF // microphthalmia-associated transcription factor // --- // 100033                          | MITF         | <0.05   | 6.41019     |
| 14994408      | ---                                                                                                              | ---          | <0.05   | 6.40586     |
| 14966729      | ENSECAT00000024391 // LOC100071384 // carbonic anhydrase 4-like // --- // 100071384 //                           | LOC100071384 | <0.05   | 6.40104     |
| 15092846      | ENSECAT00000010453 // LOC100059248 // protein Dr1-like // --- // 100059248 // XM_00149                           | LOC100059248 | <0.05   | 6.39932     |
| 15079044      | ---                                                                                                              | ---          | <0.05   | 6.39406     |
| 15026316      | ENSECAT00000007892 // LOC100629547 // uncharacterized protein C4orf32-like // --- // 10                          | LOC100629547 | <0.05   | 6.36469     |
| 15002648      | ---                                                                                                              | ---          | <0.05   | 6.35294     |
| 14948614      | ENSECAT00000004529 // SPTSSA // serine palmitoyltransferase, small subunit A // --- //                           | SPTSSA       | <0.05   | 6.3039      |
| 15012190      | XM_001497843 // LOC100067916 // nmrA-like family domain-containing protein 1-like // --                          | LOC100067916 | <0.05   | 6.30263     |
| 14957489      | XM_001503227 // ARHGAP18 // Rho GTPase activating protein 18 // --- // 100073070 // EN                           | ARHGAP18     | <0.05   | 6.28675     |
| 15019145      | ENSECAT00000024692 // LOC100061432 // NAD kinase-like // --- // 100061432                                        | LOC100061432 | <0.05   | 6.25351     |
| 15033102      | ENSECAT00000010936 // SREK1IP1 // SREK1-interacting protein 1 // --- // ---                                      | SREK1IP1     | <0.05   | 6.23632     |
| 15088609      | XM_001496963 // LOC100066781 // GPI-anchor transamidase-like // --- // 100066781 // EN                           | LOC100066781 | <0.05   | 6.1836      |
| 14988241      | ---                                                                                                              | ---          | <0.05   | 6.18252     |
| 15066732      | XM_001491232 // LOC100058151 // lysosome membrane protein 2-like // --- // 100058151 //                          | LOC100058151 | <0.05   | 6.16248     |

|          |                                                                                         |              |        |         |
|----------|-----------------------------------------------------------------------------------------|--------------|--------|---------|
| 15090442 | XM_003364970 // LOC100629275 // SLAM family member 9-like // --- // 100629275 // ENSEC  | LOC100629275 | <-0.05 | 6.14992 |
| 15097754 | ENSECAT00000013743 // LRP1 // low density lipoprotein receptor-related protein 1 // --- | LRP1         | <-0.05 | 6.0825  |
| 15028919 |                                                                                         |              | <-0.05 | 6.01945 |
| 15060512 | ENSECAT00000011449 // GNPTAB // N-acetylglucosamine-1-phosphate transferase, alpha and  | GNPTAB       | <-0.05 | 6.00849 |
| 15094045 | ENSECAT00000017571 // SLC11A1 // solute carrier family 11 (proton-coupled divalent meta | SLC11A1      | <-0.05 | 5.97642 |
| 15104217 | ENSECAT00000013638 // LOC100061627 // l-aminoadipate-semialdehyde dehydrogenase-phospho | LOC100061627 | <-0.05 | 5.95764 |
| 14934104 | ENSECAT00000023736 // LOC100071652 // ankyrin repeat domain-containing protein 22-like  | LOC100071652 | <-0.05 | 5.89193 |
| 15028920 |                                                                                         |              | <-0.05 | 5.88862 |
| 15119610 | XM_001492336 // YES1 // v-yes-1 Yamaguchi sarcoma viral oncogene homolog 1 // --- // 10 | YES1         | <-0.05 | 5.88836 |
| 15132189 | NR_033090 // MIR421 // microRNA mir-421 // --- // 100314944                             | MIR421       | <-0.05 | 5.81119 |
| 15021753 | ENSECAT00000000533 // AKR1A1 // aldo-keto reductase family 1, member A1 (aldehyde reduc | AKR1A1       | <-0.05 | 5.79087 |
| 15133050 | XM_003365863 // LOC100058639 // septin-6-like // --- // 100058639 // XM_003365864 // L  | LOC100058639 | <-0.05 | 5.77819 |
| 15085165 | ENSECAT00000008630 // LOC100049921 // protein odr-4 homolog // --- // 100049921         | LOC100049921 | <-0.05 | 5.75237 |
| 15111327 |                                                                                         |              | <-0.05 | 5.7375  |
| 14939634 | XM_001505137 // LOC100058767 // purine nucleoside phosphorylase-like // --- // 10005876 | LOC100058767 | <-0.05 | 5.72898 |
| 14974360 | XM_001494157 // LOC100055087 // interferon regulatory factor 7-like // --- // 100055087 | LOC100055087 | <-0.05 | 5.69449 |
| 14961814 | ENSECAT00000010739 // LOC100071750 // myosin-ld-like // --- // 100071750 // XM_0015016  | LOC100071750 | <-0.05 | 5.69068 |
| 15010072 | XM_001500017 // LOC100053400 // protein lunapark-like // --- // 100053400 // ENSECAT00  | LOC100053400 | <-0.05 | 5.68659 |
| 15054013 | XM_001493319 // MORC3 // MORC family CW-type zinc finger 3 // --- // 100061343 // ENSE  | MORC3        | <-0.05 | 5.6809  |
| 15024161 |                                                                                         |              | <-0.05 | 5.65047 |
| 15052013 | ENSECAT00000018972 // SUSD1 // sushi domain containing 1 // --- // 100057493 // XM_001  | SUSD1        | <-0.05 | 5.6035  |
| 15051765 | XM_001491865 // CTNNAL1 // catenin (cadherin-associated protein), alpha-like 1 // --- / | CTNNAL1      | <-0.05 | 5.57977 |
| 15001122 | ENSECAT00000020926 // OXSR1 // oxidative-stress responsive 1 // --- // 100050017 // XM  | OXSR1        | <-0.05 | 5.57353 |
| 15109765 |                                                                                         |              | <-0.05 | 5.53241 |
| 14930111 | ---                                                                                     |              | <-0.05 | 5.52763 |
| 14992663 | ENSECAT00000016266 // PCYOX1 // prenylcysteine oxidase 1 // --- // ---                  | PCYOX1       | <-0.05 | 5.52387 |
| 14983672 | XM_001503689 // ERAP1 // endoplasmic reticulum aminopeptidase 1 // --- // 100073224 //  | ERAP1        | <-0.05 | 5.50394 |
| 15003200 | XM_001488628 // LOC100055495 // chronic lymphocytic leukemia deletion region gene 6 pro | LOC100055495 | <-0.05 | 5.49061 |
| 15066947 | ENSECAT00000008370 // LOC100052823 // estradiol 17-beta-dehydrogenase 11-like // --- // | LOC100052823 | <-0.05 | 5.48856 |
| 15090577 | ---                                                                                     |              | <-0.05 | 5.47315 |
| 15020790 | ENSECAT00000007596 // MFSDB // major facilitator superfamily domain containing 8 // --- | MFSDB        | <-0.05 | 5.46775 |
| 14989918 | ENSECAT00000018766 // LOC100069189 // zinc finger protein 36, C3H1 type-like 2-like //  | LOC100069189 | <-0.05 | 5.46674 |
| 15095505 | ENSECAT00000020320 // LOC100058416 // probable fructose-2,6-bisphosphatase TIGAR-like / | LOC100058416 | <-0.05 | 5.46249 |
| 15066940 | ENSECAT00000017475 // LOC100054851 // Golgi phosphoprotein 3-like // --- // 100054851 / | LOC100054851 | <-0.05 | 5.45962 |
| 14991168 | ENSECAT00000013227 // CMPK2 // cytidine monophosphate (UMP-CMP) kinase 2, mitochondrial | CMPK2        | <-0.05 | 5.45677 |
| 15056735 |                                                                                         |              | <-0.05 | 5.44913 |
| 14960956 |                                                                                         |              | <-0.05 | 5.42345 |
| 15063605 | ENSECAT00000007499 // CELF2 // CUGBP, Elav-like family member 2 // --- // 100056973     | CELF2        | <-0.05 | 5.40834 |
| 15003667 | XM_001488399 // IRG1 // immunoresponsive 1 homolog (mouse) // --- // 100052594 // ENSE  | IRG1         | <-0.05 | 5.40761 |
| 14988260 |                                                                                         |              | <-0.05 | 5.38704 |
| 15016678 | XM_001503336 // LOC100068301 // palmitoyl-protein thioesterase 1-like // --- // 1000683 | LOC100068301 | <-0.05 | 5.32264 |
| 15056472 | XM_001492050 // LOC100058620 // RWD domain-containing protein 4-like // --- // 10005862 | LOC100058620 | <-0.05 | 5.32075 |
| 14953042 | ENSECAT00000025228 // LOC100072974 // acid sphingomyelinase-like phosphodiesterase 3a-l | LOC100072974 | <-0.05 | 5.30617 |
| 15100599 | XM_001496928 // LOC100066737 // heme-binding protein 1-like // --- // 100066737 // ENS  | LOC100066737 | <-0.05 | 5.2957  |
| 15089320 | XM_001493813 // LOC100051501 // brain protein 44-like // --- // 100051501 // ENSECAT00  | LOC100051501 | <-0.05 | 5.29524 |
| 15096334 | ENSECAT00000019669 // LOC100062970 // LYS motif-containing protein 5-like // --- // 100 | LOC100062970 | <-0.05 | 5.29195 |
| 14985662 |                                                                                         |              | <-0.05 | 5.28236 |
| 14992482 | ENSECAT00000004426 // LOC100049814 // STAM-binding protein-like // --- // 100049814     | LOC100049814 | <-0.05 | 5.27741 |
| 14948730 | ENSECAT00000024001 // LOC100050882 // MAP3K12-binding inhibitory protein 1-like // ---  | LOC100050882 | <-0.05 | 5.25612 |
| 14937659 | EF397516 // RPS27L // ribosomal protein S27-like // --- // 100067253                    | RPS27L       | <-0.05 | 5.24881 |
| 14932809 | ENSECAT00000007590 // LOC100067493 // shootin-1-like // --- // 100067493 // XM_0014947  | LOC100067493 | <-0.05 | 5.24188 |
| 15043389 | XM_001917215 // LOC100059240 // GTP:AMP phosphotransferase, mitochondrial-like // --- / | LOC100059240 | <-0.05 | 5.22486 |
| 14975916 | ENSECAT00000009012 // SPN // sialoporphin // --- // ---                                 | SPN          | <-0.05 | 5.22202 |
| 15047937 | XM_001497437 // LOC100053265 // legumain-like // --- // 100053265 // ENSECAT0000001104  | LOC100053265 | <-0.05 | 5.21611 |
| 15133995 | ENSECAT00000010186 // MPP1 // membrane protein, palmitoylated 1, 55kDa // --- // 100063 | MPP1         | <-0.05 | 5.20584 |
| 15029644 | XM_001489822 // LOC100050826 // neuritin-like // --- // 100050826 // ENSECAT0000000711  | LOC100050826 | <-0.05 | 5.19457 |
| 15087433 | XM_001499911 // LOC100065284 // pre-mRNA-splicing factor SPF27-like // --- // 100065284 | LOC100065284 | <-0.05 | 5.18828 |
| 15121289 | XM_001497054 // LOC100066888 // protein FAN-like // --- // 100066888 // ENSECAT0000000  | LOC100066888 | <-0.05 | 5.17893 |
| 15055602 | XM_001490002 // ITGB2 // integrin, beta 2 (complement component 3 receptor 3 and 4 subu | ITGB2        | <-0.05 | 5.16771 |
| 15035682 | ---                                                                                     |              | <-0.05 | 5.13504 |
| 15058538 | ENSECAT00000020229 // LOC100066907 // cholinephosphotransferase 1-like // --- // 100066 | LOC100066907 | <-0.05 | 5.128   |
| 14952189 | ENSECAT00000022431 // SENP6 // SUMO1/sentrin specific peptidase 6 // --- // ---         | SENP6        | <-0.05 | 5.10071 |
| 15028926 |                                                                                         |              | <-0.05 | 5.0902  |
| 15005444 | XM_001488367 // LOC100052476 // uncharacterized LOC100052476 // --- // 100052476 // EN  | LOC100052476 | <-0.05 | 5.08504 |
| 15066529 | XM_003364673 // LOC100630403 // placenta-specific gene 8 protein-like // --- // 1006304 | LOC100630403 | <-0.05 | 5.08396 |
| 14930055 | ---                                                                                     |              | <-0.05 | 5.07476 |
| 15002728 | NM_001163965 // ALOX5AP // arachidonate 5-lipoxygenase-activating protein // --- // 100 | ALOX5AP      | <-0.05 | 5.05691 |
| 15001420 | ENSECAT00000016147 // TGFB2 // transforming growth factor, beta receptor II (70/80kDa)  | TGFB2        | <-0.05 | 5.03595 |
| 14973811 |                                                                                         |              | <-0.05 | 5.02274 |
| 15109422 | ENSECAT00000009016 // LOC100069290 // caspase-12-like // --- // 100069290 // XM_001499  | LOC100069290 | <-0.05 | 5.01017 |
| 15036000 | ENSECAT00000018036 // FAM105A // family with sequence similarity 105, member A // --- / | FAM105A      | <-0.05 | 4.98241 |
| 15024167 |                                                                                         |              | <-0.05 | 4.98226 |
| 15089466 | XM_001496519 // LOC100052201 // vesicle-associated membrane protein 4-like // --- // 10 | LOC100052201 | <-0.05 | 4.97547 |
| 15020149 | ENSECAT00000014733 // LOC100068165 // transmembrane protein 192-like // --- // 10006816 | LOC100068165 | <-0.05 | 4.96014 |
| 15026919 | ENSECAT00000016162 // LOC100066056 // protein FAM8A1-like // --- // 100066056 // XM_00  | LOC100066056 | <-0.05 | 4.95747 |
| 15106911 | ENSECAT00000019345 // ARRB1 // arrestin, beta 1 // --- // 100064657                     | ARRB1        | <-0.05 | 4.93835 |
| 14956044 | XM_001497890 // LOC100067982 // protein MB21D1-like // --- // 100067982 // ENSECAT0000  | LOC100067982 | <-0.05 | 4.92531 |
| 15054729 | XM_001499808 // LOC100070130 // charged multivesicular body protein 2b-like // --- // 1 | LOC100070130 | <-0.05 | 4.91391 |
| 15069788 |                                                                                         |              | <-0.05 | 4.90015 |
| 15028925 |                                                                                         |              | <-0.05 | 4.89625 |
| 15029439 | ENSECAT00000025473 // OGFRL1 // opioid growth factor receptor-like 1 // --- // 10007108 | OGFRL1       | <-0.05 | 4.89482 |
| 14952076 |                                                                                         |              | <-0.05 | 4.89244 |
| 14952967 | ---                                                                                     |              | <-0.05 | 4.88996 |
| 15017781 | XM_001501327 // FUCA1 // fucosidase, alpha-L- 1, tissue // --- // 100071543 // ENSECAT  | FUCA1        | <-0.05 | 4.88664 |
| 15034327 | XM_001491155 // LOC100058040 // solute carrier family 12 member 7-like // --- // 100058 | LOC100058040 | <-0.05 | 4.87968 |
| 15093362 | ---                                                                                     |              | <-0.05 | 4.87522 |
| 15017011 |                                                                                         |              | <-0.05 | 4.8684  |
| 14928677 | ---                                                                                     |              | <-0.05 | 4.86547 |
| 15071639 | XM_001494523 // OCIAD1 // OCIA domain containing 1 // --- // 100054246 // ENSECAT00000  | OCIAD1       | <-0.05 | 4.85171 |
| 14988263 |                                                                                         |              | <-0.05 | 4.84195 |
| 15090460 | XM_001503884 // LOC100066720 // junctional adhesion molecule A-like // --- // 100066720 | LOC100066720 | <-0.05 | 4.8304  |
| 15081257 | XM_003364824 // LOC100630906 // transmembrane protein C7orf23 homolog // --- // 1006309 | LOC100630906 | <-0.05 | 4.82126 |
| 15118233 | XM_001489039 // LOC100050323 // gatC-like protein-like // --- // 100050323 // ENSECAT0  | LOC100050323 | <-0.05 | 4.81435 |
| 15060741 |                                                                                         |              | <-0.05 | 4.80971 |
| 15092213 | XM_001498786 // CTTNBP2NL // CTTNBP2 N-terminal like // --- // 100059014 // ENSECAT000  | CTTNBP2NL    | <-0.05 | 4.80206 |
| 15003673 | ENSECAT00000010662 // LOC100052699 // ceroid-lipofuscinosis neuronal protein 5-like //  | LOC100052699 | <-0.05 | 4.80198 |
| 15075859 | ENSECAT00000017712 // LOC100055381 // ribonuclease T2-like // --- // 100055381 // XM_0  | LOC100055381 | <-0.05 | 4.79775 |
| 14956880 | XM_001503938 // LOC100066344 // autophagy protein 5-like // --- // 100066344 // XM_001  | LOC100066344 | <-0.05 | 4.76593 |
| 14954371 | ---                                                                                     |              | <-0.05 | 4.76428 |
| 15032122 | ENSECAT00000018852 // GCLC // glutamate-cysteine ligase, catalytic subunit // --- // 10 | GCLC         | <-0.05 | 4.76233 |
| 15069782 |                                                                                         |              | <-0.05 | 4.74841 |
| 15106855 | XM_001917175 // LOC100063217 // serine/threonine-protein kinase PAK 1-like // --- // 10 | LOC100063217 | <-0.05 | 4.74717 |
| 14994617 | ENSECAT00000010440 // LOC100072610 // radical S-adenosyl methionine domain-containing p | LOC100072610 | <-0.05 | 4.74414 |
| 15133967 | XM_001492232 // G6PD // glucose-6-phosphate dehydrogenase // --- // 100059734 // ENSEC  | G6PD         | <-0.05 | 4.74122 |
| 14988247 |                                                                                         |              | <-0.05 | 4.72857 |
| 15011355 | ENSECAT00000018545 // LOC100068972 // methyltransferase-like protein 21A-like // --- // | LOC100068972 | <-0.05 | 4.72629 |



|           |                     |                                                                            |              |        |         |
|-----------|---------------------|----------------------------------------------------------------------------|--------------|--------|---------|
| 15007983  | ENSECAT00000016494  | // LOC100070523 // mps one binder kinase activator-like 3-like --          | LOC100070523 | <-0.05 | 4.07287 |
| 15026760  | XM_001491437        | // PAK1IP1 // PAK1 interacting protein 1 -- // 10005197 // ENSECAT00       | PAK1IP1      | <-0.05 | 4.06323 |
| 15057871  | ENSECAT00000007163  | // ZDHHC17 // zinc finger, DHHC-type containing 17 -- // 1000592           | ZDHHC17      | <-0.05 | 4.06319 |
| 15085595  | ---                 | ---                                                                        | ---          | <-0.05 | 4.0626  |
| 15082811  | ---                 | ---                                                                        | ---          | <-0.05 | 4.0623  |
| 15136060  | ---                 | ---                                                                        | ---          | <-0.05 | 4.06183 |
| 14992694  | XM_001490819        | // LOC100050657 // annexin A4-like -- // 100050657 // ENSECAT00000013      | LOC100050657 | <-0.05 | 4.04176 |
| 14984636  | XM_001502804        | // CPEB4 // cytoplasmic polyadenylation element binding protein 4 -- //    | CPEB4        | <-0.05 | 4.03037 |
| 14969557  | ENSECAT00000010831  | // LOC100050075 // estradiol 17-beta-dehydrogenase 12-like -- //           | LOC100050075 | <-0.05 | 4.02541 |
| 15036845  | ENSECAT00000018434  | // LOC100629353 // RING finger protein 24-like -- // 100629353 /           | LOC100629353 | <-0.05 | 4.02481 |
| 15078126  | ENSECAT00000014353  | // LOC100630238 // e3 ubiquitin-protein ligase RNF6-like -- // 1           | LOC100630238 | <-0.05 | 4.0223  |
| 14988619  | ENSECAT00000000954  | // LOC100052855 // t-cell surface glycoprotein CD8 beta chain-like /       | LOC100052855 | <-0.05 | 4.0199  |
| 14928813  | ---                 | ---                                                                        | ---          | <-0.05 | 4.01549 |
| 15021662  | XM_001495067        | // LOC100051817 // putative methyltransferase NSUN4-like -- // 1000518     | LOC100051817 | <-0.05 | 4.01363 |
| 15110324  | XM_001505075        | // LOC100064265 // transmembrane protein 218-like -- // 100064265 //       | LOC100064265 | <-0.05 | 4.00767 |
| 14945214  | ENSECAT000000024103 | // LOC100057905 // TM2 domain-containing protein 3-like -- // 10           | LOC100057905 | <-0.05 | 3.99843 |
| 150044811 | ENSECAT00000019716  | // LOC100052428 // protein Churchill-like -- // 100052428 // XM            | LOC100052428 | <-0.05 | 3.98794 |
| 15003753  | XM_001489318        | // LOC100050355 // ubiquitin carboxyl-terminal hydrolase isozyme L3-like / | LOC100050355 | <-0.05 | 3.98352 |
| 15124754  | XM_001499489        | // LOC100058071 // probable ribosome biogenesis protein RLP24-like -- //   | LOC100058071 | <-0.05 | 3.98174 |
| 15045260  | XM_001490976        | // LOC100057010 // rRNA-processing protein FCF1 homolog -- // 10005701     | LOC100057010 | <-0.05 | 3.97856 |
| 15053657  | XM_001498520        | // LOC100068696 // multidrug resistance-associated protein 1-like -- //    | LOC100068696 | <-0.05 | 3.97747 |
| 15078045  | XM_003364826        | // LOC100068610 // sorting nexin-10-like -- // 100068610 // ENSECAT00      | LOC100068610 | <-0.05 | 3.9696  |
| 15123912  | ---                 | ---                                                                        | ---          | <-0.05 | 3.96869 |
| 15106580  | XM_001488653        | // LOC100050120 // cysteine and histidine-rich domain-containing protein 1 | LOC100050120 | <-0.05 | 3.96737 |
| 15062274  | ENSECAT00000021501  | // LOC100068422 // 3-hydroxyacyl-CoA dehydratase 1-like -- // 10           | LOC100068422 | <-0.05 | 3.96669 |
| 14985697  | ---                 | ---                                                                        | ---          | <-0.05 | 3.96657 |
| 14962163  | ---                 | ---                                                                        | ---          | <-0.05 | 3.96635 |
| 15044782  | ENSECAT00000018657  | // ZBTB1 // zinc finger and BTB domain containing 1 -- // 100052           | ZBTB1        | <-0.05 | 3.95834 |
| 15012487  | ENSECAT00000015076  | // TM4SF19 // transmembrane 4 L six family member 19 -- // 10006           | TM4SF19      | <-0.05 | 3.95796 |
| 15081477  | XM_001492902        | // LOC100051572 // BET1 homolog -- // 100051572 // ENSECAT00000025977      | LOC100051572 | <-0.05 | 3.95737 |
| 14932724  | XM_001493616        | // LOC100058646 // thioredoxin-dependent peroxide reductase, mitochondrial | LOC100058646 | <-0.05 | 3.9545  |
| 14944107  | XM_001492832        | // LOC100050954 // geranylgeranyl pyrophosphate synthase-like -- // 10     | LOC100050954 | <-0.05 | 3.95016 |
| 15089112  | XM_001489449        | // LOC100055118 // nuclear ubiquitous casein and cyclin-dependent kinases  | LOC100055118 | <-0.05 | 3.94219 |
| 15021905  | ---                 | ---                                                                        | ---          | <-0.05 | 3.93903 |
| 15128598  | ---                 | ---                                                                        | ---          | <-0.05 | 3.93453 |
| 15060932  | ENSECAT00000024087  | // LOC100054701 // ras-related C3 botulinum toxin substrate 2-like /       | LOC100054701 | <-0.05 | 3.92737 |
| 15094026  | XM_001491285        | // PNKD // paroxysmal nonkinesigenic dyskinesia -- // 100055676 // EN      | PNKD         | <-0.05 | 3.92634 |
| 15068182  | XM_001499798        | // LOC100070117 // wolframin-like -- // 100070117 // ENSECAT000000137      | LOC100070117 | <-0.05 | 3.92553 |
| 15102593  | ENSECAT00000011406  | // LOC100058984 // matrix metalloproteinase-19-like -- // 100058           | LOC100058984 | <-0.05 | 3.91911 |
| 15068036  | ENSECAT00000026208  | // FBXL5 // F-box and leucine-rich repeat protein 5 -- // 100055           | FBXL5        | <-0.05 | 3.91606 |
| 15089958  | ENSECAT00000022722  | // LOC100052153 // TRMT1-like protein-like -- // 100052153                 | LOC100052153 | <-0.05 | 3.91561 |
| 14966849  | ENSECAT00000020639  | // HEATR6 // HEAT repeat containing 6 -- // 100071508 // XM_001            | HEATR6       | <-0.05 | 3.91479 |
| 15112869  | ---                 | ---                                                                        | ---          | <-0.05 | 3.91313 |
| 15053870  | ---                 | ---                                                                        | ---          | <-0.05 | 3.90891 |
| 15104450  | ENSECAT00000023060  | // DLAT // dihydrolipoamide S-acyltransferase -- // 100062027              | DLAT         | <-0.05 | 3.90747 |
| 14961469  | XM_001503753        | // RPS6KB1 // ribosomal protein S6 kinase, 70kDa, polypeptide 1 -- //      | RPS6KB1      | <-0.05 | 3.90178 |
| 14961850  | XM_001501677        | // CRLF3 // cytokine receptor-like factor 3 -- // 100071822 // ENSECA      | CRLF3        | <-0.05 | 3.89881 |
| 14943242  | XM_001502612        | // LOC100072614 // graves disease carrier protein-like -- // 100072614     | LOC100072614 | <-0.05 | 3.89047 |
| 14941662  | ENSECAT00000025956  | // TCF7L2 // transcription factor 7-like 2 (T-cell specific, HMG-box       | TCF7L2       | <-0.05 | 3.88782 |
| 14953260  | ENSECAT00000013992  | // ENPP1 // ectonucleotide pyrophosphatase/phosphodiesterase 1 -- //       | ENPP1        | <-0.05 | 3.88614 |
| 14943787  | ENSECAT00000005181  | // LOC100066087 // ras-related protein Rab-4A-like -- // 1000660           | LOC100066087 | <-0.05 | 3.88142 |
| 15124520  | XM_001497477        | // LOC100067415 // putative deoxyribonuclease TATDN1-like -- // 100067     | LOC100067415 | <-0.05 | 3.876   |
| 14939626  | ---                 | ---                                                                        | ---          | <-0.05 | 3.87235 |
| 14968427  | ---                 | ---                                                                        | ---          | <-0.05 | 3.86765 |
| 15104589  | XM_001502187        | // LOC100062339 // oligoribonuclease, mitochondrial-like -- // 1000623     | LOC100062339 | <-0.05 | 3.86044 |
| 15135974  | ---                 | ---                                                                        | ---          | <-0.05 | 3.8596  |
| 15130771  | ENSECAT00000014823  | // LOC100050563 // trafficking protein particle complex subunit 2-li       | LOC100050563 | <-0.05 | 3.85442 |
| 15049184  | ENSECAT00000012160  | // SNX30 // sorting nexin family member 30 -- // 100056926 // X            | SNX30        | <-0.05 | 3.8497  |
| 15057310  | XM_001488435        | // LOC100050103 // CCR4-NOT transcription complex subunit 7-like -- //     | LOC100050103 | <-0.05 | 3.84917 |
| 15062697  | ---                 | ---                                                                        | ---          | <-0.05 | 3.84882 |
| 15069787  | ---                 | ---                                                                        | ---          | <-0.05 | 3.84608 |
| 14942619  | XM_001502528        | // EXOC6 // exocyst complex component 6 -- // 100061840 // ENSECAT000      | EXOC6        | <-0.05 | 3.84499 |
| 15035773  | XM_001499617        | // SLC1A3 // solute carrier family 1 (glial high affinity glutamate transp | SLC1A3       | <-0.05 | 3.84198 |
| 14997121  | XM_001500901        | // LOC100054643 // palmitoyltransferase ZDHHC3-like -- // 100054643 //     | LOC100054643 | <-0.05 | 3.83805 |
| 14942434  | XM_003363448        | // CCNJ // cyclin J -- // 100061183 // ENSECAT00000016852 // CCNJ //       | CCNJ         | <-0.05 | 3.83732 |
| 14951074  | XM_001490969        | // LOC100055274 // leukocyte antigen CD37-like -- // 100055274 // ENS      | LOC100055274 | <-0.05 | 3.82184 |
| 15026308  | XM_001502751        | // LOC100072722 // AP-1 complex-associated regulatory protein-like -- //   | LOC100072722 | <-0.05 | 3.81746 |
| 14928135  | ---                 | ---                                                                        | ---          | <-0.05 | 3.81008 |
| 15055539  | XM_001491140        | // LOC100050760 // cystatin-B-like -- // 100050760 // ENSECAT00000014      | LOC100050760 | <-0.05 | 3.80832 |
| 15024164  | ---                 | ---                                                                        | ---          | <-0.05 | 3.80654 |
| 14945010  | ENSECAT00000021485  | // AEN // apoptosis enhancing nuclease -- // --                            | AEN          | <-0.05 | 3.8037  |
| 15009087  | ENSECAT00000022776  | // LOC100050088 // rho-related GTP-binding protein RhoE-like -- //         | LOC100050088 | <-0.05 | 3.80256 |
| 15098777  | XM_001491910        | // TUBA4A // tubulin, alpha 4a -- // 100059249 // ENSECAT00000015274       | TUBA4A       | <-0.05 | 3.80253 |
| 15048857  | ENSECAT00000005562  | // ALK5 // TGF beta receptor type 1 -- // 100034117 // XM_00149            | ALK5         | <-0.05 | 3.79296 |
| 15004629  | ENSECAT00000011800  | // SLC46A3 // solute carrier family 46, member 3 -- // 100062949           | SLC46A3      | <-0.05 | 3.7911  |
| 14997788  | ENSECAT00000017393  | // LOC100052302 // DPH3 homolog -- // 100052302 // XM_003363153            | LOC100052302 | <-0.05 | 3.78244 |
| 15024962  | ENSECAT00000012563  | // LOC100060683 // coiled-coil domain-containing protein 25-like -- //     | LOC100060683 | <-0.05 | 3.78192 |
| 15121244  | ---                 | ---                                                                        | ---          | <-0.05 | 3.78001 |
| 14941354  | XM_001496265        | // INPP5F // inositol polyphosphate-5-phosphatase F -- // 100065762 //     | INPP5F       | <-0.05 | 3.77421 |
| 15019985  | XM_001498470        | // FBXO8 // F-box protein 8 -- // 100061095 // ENSECAT00000007947 //       | FBXO8        | <-0.05 | 3.77145 |
| 14934940  | XM_001503115        | // LOC100073005 // 40S ribosomal protein S24-like -- // 100073005 //       | LOC100073005 | <-0.05 | 3.77112 |
| 15082649  | XM_001502540        | // ZNF800 // zinc finger protein 800 -- // 100056562 // ENSECAT0000000     | ZNF800       | <-0.05 | 3.76032 |
| 14957883  | ENSECAT00000017181  | // LOC100056149 // uncharacterized protein C17orf62 homolog -- //          | LOC100056149 | <-0.05 | 3.75932 |
| 14983717  | XM_001504609        | // LOC100064937 // glutaredoxin-1-like -- // 100064937 // ENSECAT0000      | LOC100064937 | <-0.05 | 3.75916 |
| 14933903  | XM_001502179        | // LOC100061542 // cytochrome P450 2C19-like -- // 100061542 // ENSEC      | LOC100061542 | <-0.05 | 3.75904 |
| 15129012  | ---                 | ---                                                                        | ---          | <-0.05 | 3.75801 |
| 14933661  | ENSECAT00000011077  | // LOC100070729 // exosome complex component CSL4-like -- // 100           | LOC100070729 | <-0.05 | 3.75747 |
| 14988255  | ---                 | ---                                                                        | ---          | <-0.05 | 3.75574 |
| 15106008  | NM_001246672        | // ACP5 // acid phosphatase 5, tartrate resistant -- // 100056621 //       | ACP5         | <-0.05 | 3.75354 |
| 15102680  | NM_001195515        | // CS // citrate synthase -- // 100052279 // ENSECAT00000017737 // CS      | CS           | <-0.05 | 3.75263 |
| 14967720  | ---                 | ---                                                                        | ---          | <-0.05 | 3.74739 |
| 14961552  | XM_001918294        | // APPBP2 // amyloid beta precursor protein (cytoplasmic tail) binding pro | APPBP2       | <-0.05 | 3.73817 |
| 15085655  | XM_001504441        | // LOC100053868 // CD48 antigen-like -- // 100053868 // ENSECAT000000      | LOC100053868 | <-0.05 | 3.73816 |
| 14967732  | ---                 | ---                                                                        | ---          | <-0.05 | 3.73657 |
| 15038451  | XM_001501211        | // LOC100071447 // RING finger protein 114-like -- // 100071447 // EN      | LOC100071447 | <-0.05 | 3.73607 |
| 15115760  | XM_001915642        | // LOC100060329 // abhydrolase domain-containing protein 3-like -- //      | LOC100060329 | <-0.05 | 3.72663 |
| 15091719  | XM_001488893        | // VPS45 // vacuolar protein sorting 45 homolog (S. cerevisiae) -- //      | VPS45        | <-0.05 | 3.72616 |
| 15082794  | ENSECAT00000013308  | // LOC100071970 // transmembrane protein 209-like -- // 10007197           | LOC100071970 | <-0.05 | 3.71343 |
| 15073336  | ENSECAT00000019881  | // LOC100054203 // MOSC domain-containing protein 1, mitochondrial-I       | LOC100054203 | <-0.05 | 3.71332 |
| 14940028  | ENSECAT00000003088  | // LOC100056825 // abhydrolase domain-containing protein 4-like -- //      | LOC100056825 | <-0.05 | 3.71258 |
| 14930799  | ---                 | ---                                                                        | ---          | <-0.05 | 3.71143 |
| 14937289  | ENSECAT00000013887  | // LOC100052900 // alpha- and gamma-adaptin-binding protein p34-like       | LOC100052900 | <-0.05 | 3.70794 |
| 15041841  | ENSECAT00000026435  | // SMARCA2 // SWI/SNF related, matrix associated, actin dependent re       | SMARCA2      | <-0.05 | 3.70758 |
| 15130603  | ENSECAT00000023027  | // BRCC3 // BRCA1/BRCA2-containing complex, subunit 3 -- // 1000           | BRCC3        | <-0.05 | 3.70705 |
| 15131330  | XM_001489506        | // LOC100055232 // dynein light chain Tctex-type 3-like -- // 10005523     | LOC100055232 | <-0.05 | 3.69631 |
| 15085717  | XM_001491425        | // LOC100058470 // peroxisomal biogenesis factor 19-like -- // 1000584     | LOC100058470 | <-0.05 | 3.68753 |

|          |                     |                                                                             |               |  |       |         |
|----------|---------------------|-----------------------------------------------------------------------------|---------------|--|-------|---------|
| 15136914 | ---                 |                                                                             |               |  | <0.05 | 3.68743 |
| 14928665 | ---                 |                                                                             |               |  | <0.05 | 3.68655 |
| 14942821 | ENSECAT00000010390  | // IFIT3 // interferon-induced protein with tetratricopeptide repeat        | IFIT3         |  | <0.05 | 3.68505 |
| 15126621 | ---                 |                                                                             |               |  | <0.05 | 3.68229 |
| 14960955 | ---                 |                                                                             |               |  | <0.05 | 3.6821  |
| 15123220 | XM_001492421        | // TERF1 // telomeric repeat binding factor (NIMA-interacting) 1 // --- //  | TERF1         |  | <0.05 | 3.67989 |
| 15059278 | XM_001502319        | // LOC100055581 // e3 ubiquitin-protein ligase RBX1-like // --- // 1000555  | LOC100055581  |  | <0.05 | 3.6798  |
| 15105668 | ENSECAT00000011207  | // LOC100064396 // EGF-like module-containing mucin-like hormone rec        | LOC100064396  |  | <0.05 | 3.67961 |
| 15100959 | ENSECAT00000020767  | // LOC100051785 // GTPase KRas-like // --- // 100051785 // XM_00149         | LOC100051785  |  | <0.05 | 3.6767  |
| 14964777 | ENSECAT00000024658  | // LOC100060986 // protein tweety homolog 2-like // --- // 100060986        | LOC100060986  |  | <0.05 | 3.67495 |
| 15045693 | XM_001497576        | // LOC100053356 // UPF0694 transmembrane protein C14orf109 homolog // ---   | LOC100053356  |  | <0.05 | 3.67395 |
| 15091713 | ENSECAT00000012027  | // LOC100058752 // pleckstrin homology domain-containing family O me        | LOC100058752  |  | <0.05 | 3.6728  |
| 15135028 | ---                 |                                                                             |               |  | <0.05 | 3.67209 |
| 14945692 | XM_001917992        | // LOC100060833 // electron transfer flavoprotein subunit alpha, mitochond  | LOC100060833  |  | <0.05 | 3.67046 |
| 15128658 | XM_001493372        | // OGT // O-linked N-acetylglucosamine (GlcNAc) transferase // --- // 1000  | OGT           |  | <0.05 | 3.65722 |
| 14962198 | XM_001504257        | // ABR // active BCR-related // --- // 100059804 // ENSECAT00000023892 //   | ABR           |  | <0.05 | 3.65164 |
| 15052072 | ENSECAT00000019055  | // FKBP15 // FK506 binding protein 15, 133kDa // --- // 100053357 //        | FKBP15        |  | <0.05 | 3.65059 |
| 14932187 | ---                 |                                                                             |               |  | <0.05 | 3.65059 |
| 14985695 | XM_001504164        | // LOC100061903 // probable UDP-sugar transporter protein SLC35A4-like //   | LOC100061903  |  | <0.05 | 3.64844 |
| 15090318 | ENSECAT00000023700  | // LOC1000629269 // c4b-binding protein alpha chain-like // --- // 10       | LOC1000629269 |  | <0.05 | 3.64563 |
| 14935922 | ENSECAT00000022627  | // LOC100053244 // signal peptidase complex catalytic subunit SEC11A        | LOC100053244  |  | <0.05 | 3.64172 |
| 14960957 | ---                 |                                                                             |               |  | <0.05 | 3.637   |
| 14934438 | ENSECAT00000011504  | // DDX21 // DEAD (Asp-Glu-Ala-Asp) box helicase 21 // --- // 1000726        | DDX21         |  | <0.05 | 3.63357 |
| 15121027 | XM_001493900        | // LOC100062272 // beta-lactamase-like protein 2-like // --- // 100062272   | LOC100062272  |  | <0.05 | 3.63273 |
| 15118670 | ---                 |                                                                             |               |  | <0.05 | 3.63254 |
| 15050324 | XM_001499340        | // ASS1 // argininosuccinate synthase 1 // --- // 100069776 // ENSECAT000   | ASS1          |  | <0.05 | 3.63118 |
| 15089884 | XM_001490231        | // NCF2 // neutrophil cytosolic factor 2 // --- // 100051787 // ENSECAT00   | NCF2          |  | <0.05 | 3.63064 |
| 15018160 | XM_001501765        | // LOC100071914 // aflatoxin B1 aldehyde reductase member 2-like // --- //  | LOC100071914  |  | <0.05 | 3.63038 |
| 15004990 | ENSECAT000000015762 | // PHF11 // PHD finger protein 11 // --- //                                 | PHF11         |  | <0.05 | 3.63029 |
| 14929807 | ---                 |                                                                             |               |  | <0.05 | 3.62174 |
| 15035177 | XM_001492811        | // PPWD1 // peptidylprolyl isomerase domain and WD repeat containing 1 //   | PPWD1         |  | <0.05 | 3.62169 |
| 15092219 | ENSECAT00000014445  | // DDX20 // DEAD (Asp-Glu-Ala-Asp) box polypeptide 20 // --- // 1000        | DDX20         |  | <0.05 | 3.62153 |
| 15130030 | XM_001494693        | // ZNF75D // zinc finger protein 75D // --- // 100063485 // ENSECAT000000   | ZNF75D        |  | <0.05 | 3.61866 |
| 15027429 | ENSECAT000000025949 | // LOC100056231 // patr class I histocompatibility antigen, A-126 al        | LOC100056231  |  | <0.05 | 3.61366 |
| 15057734 | XM_001916797        | // LOC100065372 // protein CLN8-like // --- // 100065372 // ENSECAT000000   | LOC100065372  |  | <0.05 | 3.61245 |
| 15101327 | ENSECAT00000011938  | // GXYLT1 // glucoside xylosyltransferase 1 // --- // 100054009 //          | GXYLT1        |  | <0.05 | 3.6114  |
| 14942766 | ENSECAT000000023581 | // LOC100062076 // ribonuclease P protein subunit p30-like // --- //        | LOC100062076  |  | <0.05 | 3.61092 |
| 15057441 | NM_001081798        | // TLR3 // toll-like receptor 3 // --- // 100009703 // ENSECAT00000000204   | TLR3          |  | <0.05 | 3.60992 |
| 15003160 | ENSECAT00000014628  | // INTS6 // integrator complex subunit 6 // --- // 100053346 // XM_         | INTS6         |  | <0.05 | 3.60845 |
| 15126968 | XM_001489046        | // LOC100054319 // ribose-phosphate pyrophosphokinase 2-like // --- // 100  | LOC100054319  |  | <0.05 | 3.60294 |
| 14925169 | ---                 |                                                                             |               |  | <0.05 | 3.59702 |
| 15050086 | ENSECAT00000016032  | // LOC100147452 // phytanoyl-CoA dioxygenase domain-containing prote        | LOC100147452  |  | <0.05 | 3.58626 |
| 15029718 | XM_001490955        | // LOC100051123 // adenosine 3'-phospho 3'-phosphosulfate transporter 2-li  | LOC100051123  |  | <0.05 | 3.58512 |
| 15120866 | XM_001490771        | // LOC100057425 // fatty acid-binding protein, adipocyte-like // --- // 10  | LOC100057425  |  | <0.05 | 3.58283 |
| 14995422 | XM_001495004        | // SUCLG2 // succinate-CoA ligase, GDP-forming, beta subunit // --- // 100  | SUCLG2        |  | <0.05 | 3.58161 |
| 14932099 | ---                 |                                                                             |               |  | <0.05 | 3.57982 |
| 15062811 | ENSECAT00000006430  | // LOC100630762 // signal peptidase complex subunit 1-like // --- //        | LOC100630762  |  | <0.05 | 3.57732 |
| 15042863 | XM_001488771        | // LOC100053674 // UPF0553 protein C9orf64 homolog // --- // 100053674 //   | LOC100053674  |  | <0.05 | 3.57716 |
| 15102031 | ENSECAT00000017151  | // GALNT6 // UDP-N-acetyl-alpha-D-galactosamine:polypeptide N-acetyl        | GALNT6        |  | <0.05 | 3.57692 |
| 15107665 | XM_001917959        | // IPO7 // importin 7 // --- // 100055677 // ENSECAT00000017394 // IPO7 //  | IPO7          |  | <0.05 | 3.57657 |
| 15098299 | XM_001492223        | // LOC100059724 // YEATS domain-containing protein 4-like // --- // 100059  | LOC100059724  |  | <0.05 | 3.5732  |
| 15022277 | ENSECAT00000008084  | // ZMPSTE24 // zinc metalloproteinase STE24 homolog (S. cerevisiae) /       | ZMPSTE24      |  | <0.05 | 3.56854 |
| 14987636 | ENSECAT00000003247  | // NAIP // NLR family, apoptosis inhibitory protein // --- // 100073        | NAIP          |  | <0.05 | 3.56829 |
| 15042971 | ENSECAT000000022743 | // VPS13A // vacuolar protein sorting 13 homolog A (S. cerevisiae) /        | VPS13A        |  | <0.05 | 3.56564 |
| 14932147 | ---                 |                                                                             |               |  | <0.05 | 3.56438 |
| 14986817 | ENSECAT000000026323 | // LOC100073223 // endoplasmic reticulum aminopeptidase 2-like // --        | LOC100073223  |  | <0.05 | 3.55615 |
| 15089720 | ENSECAT00000015126  | // LOC100050024 // latexin-like // --- // 100050024 // XM_001489649         | LOC100050024  |  | <0.05 | 3.553   |
| 15111874 | ENSECAT00000013561  | // POLD3 // polymerase (DNA-directed), delta 3, accessory subunit //        | POLD3         |  | <0.05 | 3.55035 |
| 14961884 | XM_001504035        | // LOC100058650 // protein EVI2B-like // --- // 100058650 // ENSECAT00000   | LOC100058650  |  | <0.05 | 3.54974 |
| 14964298 | ENSECAT000000023421 | // SYNGR2 // synaptogyrin 2 // --- //                                       | SYNGR2        |  | <0.05 | 3.54859 |
| 15111341 | ---                 |                                                                             |               |  | <0.05 | 3.54604 |
| 14929967 | ---                 |                                                                             |               |  | <0.05 | 3.54582 |
| 15129440 | ENSECAT00000015766  | // NXT2 // nuclear transport factor 2-like export factor 2 // --- //        | NXT2          |  | <0.05 | 3.54506 |
| 15071190 | XM_001487986        | // RUFY3 // RUN and FYVE domain containing 3 // --- // 100049913 // ENSEC   | RUFY3         |  | <0.05 | 3.5447  |
| 15001499 | XM_001492478        | // NR1D2 // nuclear receptor subfamily 1, group D, member 2 // --- // 1000  | NR1D2         |  | <0.05 | 3.54179 |
| 15024166 | ---                 |                                                                             |               |  | <0.05 | 3.53954 |
| 14997384 | XM_001489140        | // LRRFIP2 // leucine rich repeat (in FLII) interacting protein 2 // --- // | LRRFIP2       |  | <0.05 | 3.53518 |
| 15123201 | ENSECAT00000000005  | // LOC100146309 // transmembrane protein 70, mitochondrial-like // -        | LOC100146309  |  | <0.05 | 3.53282 |
| 15066772 | ENSECAT00000017448  | // SDAD1 // SDA1 domain containing 1 // --- // 100057877 // XM_0014         | SDAD1         |  | <0.05 | 3.53259 |
| 15081288 | ENSECAT00000009979  | // LOC100050248 // solute carrier family 25 member 40-like // --- //        | LOC100050248  |  | <0.05 | 3.52645 |
| 15118305 | ENSECAT000000026473 | // LOC100051008 // phosphatidylethanolamine-binding protein 1-like /        | LOC100051008  |  | <0.05 | 3.5258  |
| 15046692 | XM_003364080        | // LOC100630267 // protein cornichon homolog // --- // 100630267 // ENSEC   | LOC100630267  |  | <0.05 | 3.523   |
| 14995999 | ENSECAT00000004449  | // PBRM1 // polybromo 1 // --- // 100051687                                 | PBRM1         |  | <0.05 | 3.52136 |
| 15046904 | ENSECAT00000000056  | // TRMT5 // tRNA methyltransferase 5 homolog (S. cerevisiae) // ---         | TRMT5         |  | <0.05 | 3.52034 |
| 15117903 | XM_001496058        | // ADRBK2 // adrenergic, beta, receptor kinase 2 // --- // 100065495 // E   | ADRBK2        |  | <0.05 | 3.51911 |
| 15038910 | ---                 |                                                                             |               |  | <0.05 | 3.51827 |
| 14976906 | ENSECAT00000019016  | // LITAF // lipopolysaccharide-induced TNF factor // --- // 10003392        | LITAF         |  | <0.05 | 3.51364 |
| 14939112 | XM_001503436        | // LOC100071164 // complex I intermediate-associated protein 30, mitochond  | LOC100071164  |  | <0.05 | 3.50662 |
| 15078973 | ---                 |                                                                             |               |  | <0.05 | 3.50042 |
| 14956133 | ENSECAT00000014850  | // TMEM30A // transmembrane protein 30A // --- //                           | TMEM30A       |  | <0.05 | 3.49746 |
| 14959667 | XM_001495148        | // LOC100064169 // dephospho-CoA kinase domain-containing protein-like //   | LOC100064169  |  | <0.05 | 3.49331 |
| 14961882 | XM_003362422        | // LOC100630810 // protein EVI2A-like // --- // 100630810 // ENSECAT00000   | LOC100630810  |  | <0.05 | 3.49284 |
| 14978980 | ENSECAT000000026699 | // LOC100061188 // protein NipSnap homolog 2-like // --- // 10006118        | LOC100061188  |  | <0.05 | 3.49177 |
| 15118546 | ENSECAT00000007051  | // LOC100057885 // SH2B adapter protein 3-like // --- // 100057885 //       | LOC100057885  |  | <0.05 | 3.49155 |
| 15041503 | XM_001488638        | // LOC100053331 // uncharacterized LOC100053331 // --- // 100053331 // EN   | LOC100053331  |  | <0.05 | 3.49049 |
| 14952819 | XM_001502273        | // LOC100072355 // s-adenosylmethionine decarboxylase proenzyme-like // --  | LOC100072355  |  | <0.05 | 3.48522 |
| 14989582 | ENSECAT000000007818 | // CDC8A // coiled-coil domain containing 88A // --- //                     | CDC8A         |  | <0.05 | 3.48409 |
| 15029016 | ENSECAT00000009130  | // ENPP4 // ectonucleotide pyrophosphatase/phosphodiesterase 4 (puta        | ENPP4         |  | <0.05 | 3.48283 |
| 14996695 | XM_001498943        | // LOC100053786 // cytochrome b-c1 complex subunit 1, mitochondrial-like /  | LOC100053786  |  | <0.05 | 3.48247 |
| 14996446 | NM_001166479        | // GPX1 // glutathione peroxidase 1 // --- // 100053396 // ENSECAT00000001  | GPX1          |  | <0.05 | 3.47784 |
| 15089532 | ---                 |                                                                             |               |  | <0.05 | 3.47735 |
| 15004541 | ENSECAT00000014237  | // RNF6 // ring finger protein (C3H2C3 type) 6 // --- // 100050743 /        | RNF6          |  | <0.05 | 3.47637 |
| 15060855 | ---                 |                                                                             |               |  | <0.05 | 3.47606 |
| 15000947 | ---                 |                                                                             |               |  | <0.05 | 3.46986 |
| 14988137 | XM_001491463        | // ACTR1B // ARP1 actin-related protein 1 homolog B, contractin beta (yeas  | ACTR1B        |  | <0.05 | 3.46984 |
| 14989276 | ---                 |                                                                             |               |  | <0.05 | 3.46665 |
| 15099120 | ENSECAT00000019696  | // SLC16A14 // solute carrier family 16, member 14 (monocarboxylic a        | SLC16A14      |  | <0.05 | 3.46638 |
| 15022934 | ENSECAT000000024759 | // LOC100070667 // YTH domain family protein 2-like // --- // 100070        | LOC100070667  |  | <0.05 | 3.46622 |
| 14953331 | ENSECAT000000020831 | // LOC100067729 // TATA box-binding protein-like protein 1-like // -        | LOC100067729  |  | <0.05 | 3.46333 |
| 14937668 | ENSECAT00000019241  | // LOC100067582 // vacuolar protein sorting-associated protein 13C-I        | LOC100067582  |  | <0.05 | 3.45844 |
| 14947323 | ENSECAT000000020958 | // LOC100056957 // calcium-binding protein p22-like // --- // 100056        | LOC100056957  |  | <0.05 | 3.45809 |
| 14928149 | ---                 |                                                                             |               |  | <0.05 | 3.45665 |
| 14992055 | XM_001497468        | // RPIA // ribose 5-phosphate isomerase A // --- // 100052643 // ENSECAT0   | RPIA          |  | <0.05 | 3.45454 |
| 15043751 | NM_001257143        | // KLHL9 // kelch-like 9 (Drosophila) // --- // 100064784 // ENSECAT00000   | KLHL9         |  | <0.05 | 3.45444 |
| 15131576 | XM_001492729        | // LOC100051459 // protein UXT-like // --- // 100051459 // ENSECAT0000001   | LOC100051459  |  | <0.05 | 3.45438 |
| 14936613 | XM_003363641        | // NIPA2 // non imprinted in Prader-Willi/Angelman syndrome 2 // --- // 10  | NIPA2         |  | <0.05 | 3.44958 |

|          |                                                                                                 |               |       |         |
|----------|-------------------------------------------------------------------------------------------------|---------------|-------|---------|
| 15021553 | XM_001491520 // OSBPL9 // oxysterol binding protein-like 9 // --- // 100051050 /// ENSE         | OSBPL9        | <0.05 | 3.44836 |
| 15047056 | ENSECAT00000022194 // LOC100063295 // retinol dehydrogenase 11-like // --- // 100063295         | LOC100063295  | <0.05 | 3.44749 |
| 15043978 | XM_001499560 // DCAF12 // DBB1 and CUL4 associated factor 12 // --- // 100068462 /// EN         | DCAF12        | <0.05 | 3.44122 |
| 14965688 | XM_003362552 // ATP6V0A1 // ATPase, H+ transporting, lysosomal V0 subunit a1 // --- // 14985680 | ATP6V0A1      | <0.05 | 3.43884 |
| 14985680 |                                                                                                 |               | <0.05 | 3.43752 |
| 14983652 | ENSECAT00000019853 // RIOK2 // RIO kinase 2 (yeast) // --- // 100064864 /// XM_00150460         | RIOK2         | <0.05 | 3.43433 |
| 14944874 | EF442070 // ANPEP // alanyl (membrane) aminopeptidase // --- // 100050397                       | ANPEP         | <0.05 | 3.4326  |
| 15129146 | ENSECAT00000001525 // LOC100057749 // armadillo repeat-containing X-linked protein 3-li         | LOC100057749  | <0.05 | 3.42915 |
| 15036711 | XM_001495797 // LOC100065101 // thioredoxin-related transmembrane protein 4-like // ---         | LOC100065101  | <0.05 | 3.42701 |
| 15002158 | XM_001492309 // LOC100051043 // phospholipid scramblase 2-like // --- // 100051043 ///          | LOC100051043  | <0.05 | 3.42645 |
| 14956167 | XM_003362360 // LOC100068991 // CDGSH iron-sulfur domain-containing protein 1-like // -         | LOC100068991  | <0.05 | 3.42553 |
| 15120215 |                                                                                                 |               | <0.05 | 3.42173 |
| 15081895 | XM_001916123 // LOC100053610 // hyccin-like // --- // 100053610 /// ENSECAT00000025313          | LOC100053610  | <0.05 | 3.42108 |
| 15117681 | ENSECAT00000021479 // SEC14L2 // SEC14-like 2 (S. cerevisiae) // --- // 100058707 /// X         | SEC14L2       | <0.05 | 3.42021 |
| 15025836 | XM_001502496 // NAA15 // N(alpha)-acetyltransferase 15, NatA auxiliary subunit // --- /         | NAA15         | <0.05 | 3.41962 |
| 15127079 | XM_001490349 // LOC100051095 // carbonic anhydrase 5B, mitochondrial-like // --- // 100         | LOC100051095  | <0.05 | 3.41936 |
| 15010507 | ENSECAT00000011599 // CWC22 // CWC22 spliceosome-associated protein homolog (S. cerevis         | CWC22         | <0.05 | 3.41876 |
| 15059641 | ENSECAT00000014407 // TTC38 // tetratricopeptide repeat domain 38 // --- // 100053315 /         | TTC38         | <0.05 | 3.41658 |
| 14991570 | ENSECAT00000012398 // LOC100059155 // UPF0760 protein C2orf29-like // --- // 100059155          | LOC100059155  | <0.05 | 3.41645 |
| 14951686 | ---                                                                                             |               | <0.05 | 3.41336 |
| 15086952 | XM_001489164 // LOC100054581 // gamma-secretase subunit APH-1A-like // --- // 100054581         | LOC100054581  | <0.05 | 3.41293 |
| 14988244 |                                                                                                 |               | <0.05 | 3.41247 |
| 15087365 | XM_001500218 // LOC100059510 // suppressor of IKBKE 1-like // --- // 100059510 /// ENSE         | LOC100059510  | <0.05 | 3.41085 |
| 15075599 | ENSECAT00000017954 // FBXO30 // F-box protein 30 // --- // 100066297 /// XM_001502353 /         | FBXO30        | <0.05 | 3.40589 |
| 15016778 | ENSECAT00000012199 // LOC100054519 // four and a half LIM domains protein 3-like // ---         | LOC100054519  | <0.05 | 3.40444 |
| 15134298 | ---                                                                                             |               | <0.05 | 3.39964 |
| 15060745 |                                                                                                 |               | <0.05 | 3.39898 |
| 15061511 | ENSECAT00000024700 // LOC100051710 // uncharacterized protein KIAA0930-like // --- // 1         | LOC100051710  | <0.05 | 3.39646 |
| 15110348 | XM_001505092 // PUS3 // pseudouridylylase synthase 3 // --- // 100064416 /// ENSECAT00000       | PUS3          | <0.05 | 3.39215 |
| 14967060 | ENSECAT00000010249 // RHOT1 // ras homolog family member T1 // --- // ---                       | RHOT1         | <0.05 | 3.38817 |
| 14998480 | ENSECAT00000025072 // RNF13 // ring finger protein 13 // --- // 100058094 /// XM_001491         | RNF13         | <0.05 | 3.3851  |
| 14962675 |                                                                                                 |               | <0.05 | 3.38461 |
| 14970893 | ENSECAT00000024544 // LOC100051106 // calpain-1 catalytic subunit-like // --- // 100051         | LOC100051106  | <0.05 | 3.38391 |
| 14937077 | ENSECAT00000021871 // ADPGK // ADP-dependent glucokinase // --- // 100052166 /// XM_001         | ADPGK         | <0.05 | 3.38199 |
| 15047557 | XM_001491996 // SPTLC2 // serine palmitoyltransferase, long chain base subunit 2 // ---         | SPTLC2        | <0.05 | 3.37997 |
| 14979763 | ENSECAT00000024745 // EEF2K // eukaryotic elongation factor-2 kinase // --- // 10005838         | EEF2K         | <0.05 | 3.37781 |
| 15025108 | XM_001496538 // LOC100054913 // PIN2/TERF1-interacting telomerase inhibitor 1-like // -         | LOC100054913  | <0.05 | 3.3718  |
| 15014054 | XM_001496004 // LOC100058535 // mitochondrial import inner membrane translocase subunit         | LOC100058535  | <0.05 | 3.37082 |
| 14990202 | ENSECAT00000010650 // FEZ2 // fasciculation and elongation protein zeta 2 (zyglin II) //        | FEZ2          | <0.05 | 3.36886 |
| 14952516 | XM_001503820 // MANEA // mannosidase, endo-alpha // --- // 100065922 /// ENSECAT0000001         | MANEA         | <0.05 | 3.3669  |
| 15066675 | XM_001491801 // CNOT6L // CCR4-NOT transcription complex, subunit 6-like // --- // 1000         | CNOT6L        | <0.05 | 3.36479 |
| 14932611 | ---                                                                                             |               | <0.05 | 3.36114 |
| 14935474 | XM_001494039 // NCOA4 // nuclear receptor coactivator 4 // --- // 100062485 /// ENSECAT         | NCOA4         | <0.05 | 3.35612 |
| 14994203 | ENSECAT00000008355 // HADHB // hydroxyacyl-CoA dehydrogenase/3-ketoacyl-CoA thiolase/en         | HADHB         | <0.05 | 3.35493 |
| 15005093 | XM_003363226 // LRCH1 // leucine-rich repeats and calponin homology (CH) domain contain         | LRCH1         | <0.05 | 3.35459 |
| 14991926 | ENSECAT00000007536 // ANAPC1 // anaphase promoting complex subunit 1 // --- // 10005186         | ANAPC1        | <0.05 | 3.35371 |
| 15069786 |                                                                                                 |               | <0.05 | 3.35231 |
| 14985080 | XM_001917441 // LOC100059963 // CCR4-NOT transcription complex subunit 8-like // --- //         | LOC100059963  | <0.05 | 3.35179 |
| 14997257 | ---                                                                                             |               | <0.05 | 3.35007 |
| 15135654 | ---                                                                                             |               | <0.05 | 3.34669 |
| 15084893 | ENSECAT00000000944 // LOC100051658 // n-acetylneuraminatase lyase-like // --- // 10005165       | LOC100051658  | <0.05 | 3.34642 |
| 15063527 | ENSECAT00000008224 // LOC100056689 // optineurin-like // --- // 100056689                       | LOC100056689  | <0.05 | 3.34451 |
| 15057113 | ENSECAT00000017536 // LOC100058148 // protein MAK16 homolog // --- // 100058148 /// XM_         | LOC100058148  | <0.05 | 3.34393 |
| 14928171 | ---                                                                                             |               | <0.05 | 3.34031 |
| 14929589 | ---                                                                                             |               | <0.05 | 3.33865 |
| 15077269 | ---                                                                                             |               | <0.05 | 3.33677 |
| 15058669 | XM_001497703 // LOC100067735 // host cell factor 2-like // --- // 100067735 /// ENSECAT         | LOC100067735  | <0.05 | 3.33597 |
| 14948827 | ENSECAT00000019341 // LOC100063728 // peptidyl-prolyl cis-trans isomerase FKBP3-like //         | LOC100063728  | <0.05 | 3.3331  |
| 15104243 | ENSECAT00000025920 // LOC100061694 // ras-related protein Rab-39A-like // --- // 100061         | LOC100061694  | <0.05 | 3.332   |
| 14994882 | ENSECAT00000014207 // LOC100055795 // sodium- and chloride-dependent taurine transporte         | LOC100055795  | <0.05 | 3.33139 |
| 14949221 | XM_003363235 // LOC1000630820 // CCAAT/enhancer-binding protein gamma-like // --- // 100        | LOC1000630820 | <0.05 | 3.329   |
| 15063887 | ENSECAT00000024215 // LONP2 // lon peptidase 2, peroxisomal // --- // 100057497 /// XM_         | LONP2         | <0.05 | 3.32891 |
| 14956950 | XM_001503983 // LOC100066515 // sorting nexin-3-like // --- // 100066515 /// ENSECAT000         | LOC100066515  | <0.05 | 3.32806 |
| 15024160 | ENSECAT00000008644 // TARDBP // TAR DNA binding protein // --- // 100051482                     | TARDBP        | <0.05 | 3.32745 |
| 15006508 | XM_001489470 // RAB3GAP1 // RAB3 GTPase activating protein subunit 1 (catalytic) // ---         | RAB3GAP1      | <0.05 | 3.32721 |
| 15067708 |                                                                                                 |               | <0.05 | 3.32528 |
| 15057051 | ENSECAT00000009280 // LOC100059780 // proline synthase co-transcribed bacterial homolog         | LOC100059780  | <0.05 | 3.32365 |
| 15106847 | ENSECAT00000015914 // LOC100063117 // methylosome subunit pICln-like // --- // 10006311         | LOC100063117  | <0.05 | 3.32266 |
| 15109126 | ---                                                                                             |               | <0.05 | 3.32252 |
| 15130624 | ENSECAT00000002112 // LOC100062203 // prefoldin subunit 3-like // --- // 100062203 ///          | LOC100062203  | <0.05 | 3.32059 |
| 15120912 | ENSECAT00000022041 // LOC100059131 // interleukin-7-like // --- // 100059131 /// XM_001         | LOC100059131  | <0.05 | 3.32045 |
| 14995628 | ENSECAT00000006325 // PDHB // pyruvate dehydrogenase (lipoamide) beta // --- // 1000505         | PDHB          | <0.05 | 3.31555 |
| 15109769 | ---                                                                                             |               | <0.05 | 3.31533 |
| 14928137 | ---                                                                                             |               | <0.05 | 3.31524 |
| 15008657 | XM_001489408 // LOC100055077 // translin-like // --- // 100055077 /// ENSECAT0000001680         | LOC100055077  | <0.05 | 3.31439 |
| 15126341 | ENSECAT00000013625 // LOC100066807 // protein FAM168B-like // --- // 100066807 /// ENSE         | LOC100066807  | <0.05 | 3.31441 |
| 14928661 | ---                                                                                             |               | <0.05 | 3.31176 |
| 15114785 | ENSECAT00000023915 // LOC100059653 // e3 ubiquitin-protein ligase RNF34-like // --- //          | LOC100059653  | <0.05 | 3.31113 |
| 14966650 | XM_001503741 // LOC100071096 // peptidyl-tRNA hydrolase 2, mitochondrial-like // --- //         | LOC100071096  | <0.05 | 3.30074 |
| 14959280 |                                                                                                 |               | <0.05 | 3.29868 |
| 14983275 | XM_003362879 // LOC100630603 // glutaredoxin-like protein YDR286C homolog // --- // 100         | LOC100630603  | <0.05 | 3.29838 |
| 15133409 | XM_001489008 // LOC100054364 // ras-related protein Rap-2c-like // --- // 100054364 ///         | LOC100054364  | <0.05 | 3.29594 |
| 15088800 | ENSECAT00000014687 // LOC100630574 // guanine nucleotide-binding protein G(I)/G(S)/G(O)         | LOC100630574  | <0.05 | 3.2931  |
| 15115080 | XM_001915444 // ATP6V0A2 // ATPase, H+ transporting, lysosomal V0 subunit a2 // --- //          | ATP6V0A2      | <0.05 | 3.28719 |
| 14984926 | ENSECAT00000020093 // LOC100059534 // cyclin-G1-like // --- // 100059534 /// XM_0015033         | LOC100059534  | <0.05 | 3.28543 |
| 15058549 | ENSECAT00000009020 // LOC100067057 // DNA damage-regulated autophagy modulator protein          | LOC100067057  | <0.05 | 3.28436 |
| 14956830 | XM_001501736 // HACE1 // HECT domain and ankyrin repeat containing E3 ubiquitin protein         | HACE1         | <0.05 | 3.28352 |
| 14925079 | ---                                                                                             |               | <0.05 | 3.27757 |
| 15109249 | XM_001499359 // CCDC82 // coiled-coil domain containing 82 // --- // 100061101 /// ENSE         | CCDC82        | <0.05 | 3.27753 |
| 15013165 | XM_001502989 // LOC100061410 // ubiquitin-like-conjugating enzyme ATG3-like // --- // 1         | LOC100061410  | <0.05 | 3.27751 |
| 14958766 | XM_001492365 // LOC100059961 // hematological and neurological expressed 1 protein-like         | LOC100059961  | <0.05 | 3.27718 |
| 15122733 | XM_001496011 // GRINA // glutamate receptor, ionotropic, N-methyl D-aspartate-associate         | GRINA         | <0.05 | 3.27663 |
| 15056741 |                                                                                                 |               | <0.05 | 3.27567 |
| 15081535 | ENSECAT00000008745 // PDK4 // pyruvate dehydrogenase kinase, isozyme 4 // --- // 100052         | PDK4          | <0.05 | 3.27475 |
| 15078035 | XM_001498349 // NFE2L3 // nuclear factor (erythroid-derived 2)-like 3 // --- // 1000685         | NFE2L3        | <0.05 | 3.27367 |
| 15087776 | ENSECAT00000008255 // WDR47 // WD repeat domain 47 // --- // 100061070 /// XM_001493773         | WDR47         | <0.05 | 3.27351 |
| 14988227 |                                                                                                 |               | <0.05 | 3.27267 |
| 15045187 | XM_001489871 // LOC100056126 // acyl-coenzyme A thioesterase 6-like // --- // 100056126         | LOC100056126  | <0.05 | 3.26896 |
| 14925175 | ---                                                                                             |               | <0.05 | 3.26669 |
| 15085258 | XM_003364961 // INTS7 // integrator complex subunit 7 // --- // 100051001 /// XM_001489         | INTS7         | <0.05 | 3.25982 |
| 15121207 | XM_001495470 // LOC100052510 // armadillo repeat-containing protein 1-like // --- // 10         | LOC100052510  | <0.05 | 3.25898 |
| 14976695 | ENSECAT00000020527 // LOC100630410 // 40S ribosomal protein S15a-like // --- // 1006304         | LOC100630410  | <0.05 | 3.25694 |
| 14932105 | ---                                                                                             |               | <0.05 | 3.25632 |
| 15095973 | ENSECAT00000015525 // LOC100053911 // gamma-aminobutyric acid receptor-associated prote         | LOC100053911  | <0.05 | 3.25526 |
| 15129450 | XM_001489834 // LOC100054407 // transmembrane protein 164-like // --- // 100054407 ///          | LOC100054407  | <0.05 | 3.25353 |
| 15061338 | XM_001503005 // LOC100071003 // NFAT activation molecule 1-like // --- // 100071003 ///         | LOC100071003  | <0.05 | 3.25343 |







|          |                                                                                          |              |       |         |
|----------|------------------------------------------------------------------------------------------|--------------|-------|---------|
| 15126737 | ENSECAT00000029068 // VPS25 // vacuolar protein sorting 25 homolog (S. cerevisiae) // -  | VPS25        | <0.05 | 2.97006 |
| 15042661 | ---                                                                                      |              | <0.05 | 2.96889 |
| 15012340 | ENSECAT00000015618 // CCDC50 // coiled-coil domain containing 50 // --- // ---           | CCDC50       | <0.05 | 2.96831 |
| 15093366 | ENSECAT00000022666 // ACADM // acyl-CoA dehydrogenase, C-4 to C-12 straight chain // --  | ACADM        | <0.05 | 2.96826 |
| 15013472 | XM_001917325 // LOC100072274 // mitochondrial import receptor subunit TOM70-like // ---  | LOC100072274 | <0.05 | 2.96802 |
| 14925639 | ---                                                                                      |              | <0.05 | 2.96793 |
| 15024168 | ---                                                                                      |              | <0.05 | 2.96622 |
| 14939738 | XM_001505162 // LOC100059448 // TOX high mobility group box family member 4-like // ---  | LOC100059448 | <0.05 | 2.96604 |
| 14943342 | XM_001503764 // PSAP // prosaposin // --- // 100063520 // ENSECAT00000023432 // PSAP //  | PSAP         | <0.05 | 2.96589 |
| 14980277 | XM_001492888 // LOC100057523 // phosphomannomutase 2-like // --- // 100057523 // ENSE /  | LOC100057523 | <0.05 | 2.96572 |
| 15006122 | XM_001504923 // PTPN18 // protein tyrosine phosphatase, non-receptor type 18 (brain-der  | PTPN18       | <0.05 | 2.96436 |
| 15067377 | XM_003364714 // LOC100630825 // OCIA domain-containing protein 2-like // --- // 1006308  | LOC100630825 | <0.05 | 2.96194 |
| 15064712 | XM_001497809 // CTCF // CCCTC-binding factor (zinc finger protein) // --- // 100053363   | CTCF         | <0.05 | 2.96101 |
| 14936281 | XM_001488013 // CHD2 // chromodomain helicase DNA binding protein 2 // --- // 100049803  | CHD2         | <0.05 | 2.96077 |
| 15126718 | ---                                                                                      |              | <0.05 | 2.95917 |
| 15121755 | XM_001491535 // DPY19L4 // dpy-19-like 4 (C. elegans) // --- // 100058629 // ENSECAT00   | DPY19L4      | <0.05 | 2.95811 |
| 15071959 | ENSECAT00000009746 // LOC100064893 // phosphoglucomutase 2-like // --- // 100064893 //   | LOC100064893 | <0.05 | 2.95754 |
| 15065376 | XM_001501541 // LOC100055295 // gamma-aminobutyric acid receptor-associated protein-lik  | LOC100055295 | <0.05 | 2.95568 |
| 15118640 | XM_001915599 // LOC100058510 // calcium/calmodulin-dependent protein kinase kinase 2-li  | LOC100058510 | <0.05 | 2.95567 |
| 15098154 | XM_001491955 // LOC100051721 // ras association domain-containing protein 3-like // ---  | LOC100051721 | <0.05 | 2.95396 |
| 15092910 | ENSECAT00000007616 // LOC100059972 // putative RNA polymerase II subunit B1 CTD phospho  | LOC100059972 | <0.05 | 2.9537  |
| 15088313 | XM_001495159 // CCL2 // cysteine conjugate-beta lyase 2 // --- // 100052141 // ENSECA    | CCL2         | <0.05 | 2.95251 |
| 14985671 | ---                                                                                      |              | <0.05 | 2.95237 |
| 15107779 | XM_001501192 // USP47 // ubiquitin specific peptidase 47 // --- // 100071433 // ENSECA   | USP47        | <0.05 | 2.95217 |
| 15114669 | XM_001494131 // BRAP // BRCA1 associated protein // --- // 100057742 // ENSECAT00000000  | BRAP         | <0.05 | 2.95203 |
| 15018344 | NM_001163823 // SDHB // succinate dehydrogenase complex, subunit B, iron sulfur (lp) //  | SDHB         | <0.05 | 2.9513  |
| 14971495 | XM_001498106 // LOC100053249 // glutathione S-transferase P-like // --- // 100053249 //  | LOC100053249 | <0.05 | 2.94889 |
| 15012498 | XM_001501275 // PCYT1A // phosphate cytidyltransferase 1, choline, alpha // --- // 10    | PCYT1A       | <0.05 | 2.94749 |
| 15017855 | XM_001501425 // HNRNPR // heterogeneous nuclear ribonucleoprotein R // --- // 100071619  | HNRNPR       | <0.05 | 2.94712 |
| 14933630 | ENSECAT00000010382 // MMS19 // MMS19 nucleotide excision repair homolog (S. cerevisiae)  | MMS19        | <0.05 | 2.94692 |
| 14941745 | XM_001496787 // SMC3 // structural maintenance of chromosomes 3 // --- // 100059335 //   | SMC3         | <0.05 | 2.94568 |
| 15074323 | XM_001488034 // LOC100053608 // 3'(2')-5'-bisphosphate nucleotidase 1-like // --- // 10  | LOC100053608 | <0.05 | 2.94397 |
| 15024163 | ---                                                                                      |              | <0.05 | 2.94392 |
| 15011775 | XM_001495771 // TTC14 // tetratricopeptide repeat domain 14 // --- // 100058491 // ENS   | TTC14        | <0.05 | 2.94187 |
| 14959587 | ENSECAT00000027021 // PLEKHM1 // pleckstrin homology domain containing, family M (with   | PLEKHM1      | <0.05 | 2.94177 |
| 14947940 | ---                                                                                      |              | <0.05 | 2.93984 |
| 15033385 | ---                                                                                      |              | <0.05 | 2.93963 |
| 14979184 | XM_001500978 // LOC100063559 // protein orai-3-like // --- // 100063559 // ENSECAT0000   | LOC100063559 | <0.05 | 2.93925 |
| 15014563 | XM_001499415 // SENP5 // SUMO1/sentrin specific peptidase 5 // --- // 100069684 // ENS   | SENP5        | <0.05 | 2.93784 |
| 14988235 | ---                                                                                      |              | <0.05 | 2.93659 |
| 15056160 | XM_001494597 // LOC100063334 // malignant fibrous histiocytoma-amplified sequence 1-lik  | LOC100063334 | <0.05 | 2.93649 |
| 14938550 | ENSECAT00000001341 // LOC100070629 // spatacin-like // --- // 100070629                  | LOC100070629 | <0.05 | 2.93646 |
| 15091539 | ENSECAT000000025732 // LOC100055389 // sodium channel modifier 1-like // --- // 10005538 | LOC100055389 | <0.05 | 2.9363  |
| 14990841 | ENSECAT00000015437 // LOC100071892 // syndecan-1-like // --- // 100071892 // XM_001501   | LOC100071892 | <0.05 | 2.93595 |
| 15105373 | XM_001505079 // LOC100064327 // etoposide-induced protein 2.4 homolog // --- // 1000643  | LOC100064327 | <0.05 | 2.93502 |
| 14934969 | XM_001504023 // ANXA11 // annexin A11 // --- // 100064425 // ENSECAT00000021182 // ANX   | ANXA11       | <0.05 | 2.93436 |
| 14979157 | ENSECAT00000011636 // LOC100063491 // 3 beta-hydroxysteroid dehydrogenase type 7-like /  | LOC100063491 | <0.05 | 2.93413 |
| 15067593 | ENSECAT000000025132 // ATP8A1 // ATPase, aminophospholipid transporter (APLT), class I,  | ATP8A1       | <0.05 | 2.93374 |
| 14947933 | ---                                                                                      |              | <0.05 | 2.93332 |
| 15115626 | ENSECAT00000007438 // LOC100057183 // uncharacterized protein C18orf19 homolog // --- /  | LOC100057183 | <0.05 | 2.93267 |
| 15016231 | ---                                                                                      |              | <0.05 | 2.93232 |
| 15040286 | XM_003363924 // LOC100055373 // bladder cancer-associated protein-like // --- // 100055  | LOC100055373 | <0.05 | 2.93195 |
| 15015545 | XM_001502968 // LOC100072898 // putative methyltransferase NSUN3-like // --- // 1000728  | LOC100072898 | <0.05 | 2.92964 |
| 15092465 | ---                                                                                      |              | <0.05 | 2.92933 |
| 14967469 | XM_003362429 // MYO18A // myosin XVIIIa // --- // 100059638 // ENSECAT00000022672 // M   | MYO18A       | <0.05 | 2.92716 |
| 14980116 | XM_001488925 // RRN3 // RRN3 RNA polymerase I transcription factor homolog (S. cerevisi  | RRN3         | <0.05 | 2.92676 |
| 15090159 | XM_001489103 // LOC100054440 // serine/threonine-protein phosphatase 2A 56 kDa regulato  | LOC100054440 | <0.05 | 2.92635 |
| 14939658 | ENSECAT00000012091 // LOC100629897 // ribonuclease K6-like // --- // 100629897 // XM_0   | LOC100629897 | <0.05 | 2.92623 |
| 15048157 | ENSECAT00000001245 // LOC100049970 // histone-lysine N-methyltransferase setd3-like //   | LOC100049970 | <0.05 | 2.92476 |
| 15000805 | XM_001496955 // ABHD5 // abhydrolase domain containing 5 // --- // 100066775 // ENSECA   | ABHD5        | <0.05 | 2.92366 |
| 15111630 | ---                                                                                      |              | <0.05 | 2.92088 |
| 15012813 | XM_001500297 // LOC100070623 // importin subunit alpha-1-like // --- // 100070623 // E   | LOC100070623 | <0.05 | 2.92035 |
| 15054941 | XM_001915192 // LTN1 // listerin E3 ubiquitin protein ligase 1 // --- // 100065649 //    | LTN1         | <0.05 | 2.91737 |
| 14993184 | XM_001498254 // FOXN2 // forkhead box N2 // --- // 100053059 // ENSECAT00000008546 //    | FOXN2        | <0.05 | 2.91697 |
| 15074203 | ---                                                                                      |              | <0.05 | 2.91668 |
| 14985174 | NM_001081912 // GM2A // GM2 ganglioside activator // --- // 100034082 // ENSECAT000000   | GM2A         | <0.05 | 2.91629 |
| 15079178 | XM_001496641 // LOC100066339 // putative RNA-binding protein Luc7-like 2-like // --- //  | LOC100066339 | <0.05 | 2.91518 |
| 15011304 | XM_001505117 // NDUFS1 // NADH dehydrogenase (ubiquinone) Fe-S protein 1, 75kDa (NADH-c  | NDUFS1       | <0.05 | 2.91479 |
| 15088703 | XM_001499174 // LOC100053515 // zinc finger Ran-binding domain-containing protein 2-lik  | LOC100053515 | <0.05 | 2.91401 |
| 15051115 | XM_001917558 // LOC100059025 // arrestin domain-containing protein 1-like // --- // 100  | LOC100059025 | <0.05 | 2.91189 |
| 15028274 | XM_001499713 // KCTD20 // potassium channel tetramerisation domain containing 20 // ---  | KCTD20       | <0.05 | 2.91145 |
| 15025826 | XM_003364513 // LOC100630562 // microsomal glutathione S-transferase 2-like // --- // 1  | LOC100630562 | <0.05 | 2.90963 |
| 15003062 | ENSECAT00000011756 // COG6 // component of oligomeric golgi complex 6 // --- // 1000508  | COG6         | <0.05 | 2.90934 |
| 15125361 | XM_001917184 // ZNF251 // zinc finger protein 251 // --- // 100064391                    | ZNF251       | <0.05 | 2.90933 |
| 14933917 | XM_001917312 // NOC3L // nucleolar complex associated 3 homolog (S. cerevisiae) // ---   | NOC3L        | <0.05 | 2.90594 |
| 15106280 | XM_001916046 // LOC100053550 // eukaryotic translation initiation factor 3 subunit G //  | LOC100053550 | <0.05 | 2.90533 |
| 15031016 | XM_001496005 // LOC100052481 // proteasome subunit beta-type-8-like // --- // 100052481  | LOC100052481 | <0.05 | 2.90108 |
| 14956256 | XM_001914953 // IBTK // inhibitor of Bruton agammaglobulinemia tyrosine kinase // --- /  | IBTK         | <0.05 | 2.89763 |
| 15001342 | ENSECAT00000026925 // LOC100056080 // f-box/LRR-repeat protein 2-like // --- // 1000560  | LOC100056080 | <0.05 | 2.89724 |
| 15115781 | NM_001163985 // ROCK1 // Rho-associated, coiled-coil containing protein kinase 1 // ---  | ROCK1        | <0.05 | 2.89649 |
| 14930119 | ---                                                                                      |              | <0.05 | 2.89601 |
| 15085297 | XM_001489279 // LOC100054805 // zinc transporter 1-like // --- // 100054805 // ENSECAT   | LOC100054805 | <0.05 | 2.89511 |
| 15129715 | XM_001491785 // LOC100058835 // NADH dehydrogenase [ubiquinone] 1 alpha subcomplex subu  | LOC100058835 | <0.05 | 2.89305 |
| 15069524 | XM_001916072 // LOC100146422 // IST1 homolog // --- // 100146422 // ENSECAT00000024550   | LOC100146422 | <0.05 | 2.89281 |
| 15032840 | XM_001503333 // LOC100070992 // UPF0459 protein C19orf50 homolog // --- // 100070992 //  | LOC100070992 | <0.05 | 2.89199 |
| 15091795 | ENSECAT00000014675 // LOC100065612 // Golgi pH regulator-like // --- // 100065612 // X   | LOC100065612 | <0.05 | 2.89061 |
| 15126632 | XM_001498387 // LOC100068567 // guanine nucleotide-binding protein subunit alpha-15-lik  | LOC100068567 | <0.05 | 2.89056 |
| 14963548 | XM_001504879 // AKAP10 // A kinase (PKA) anchor protein 10 // --- // 100073152 // ENS    | AKAP10       | <0.05 | 2.89047 |
| 15058413 | ENSECAT00000010773 // GAS2L3 // growth arrest-specific 2 like 3 // --- // 100052872 //   | GAS2L3       | <0.05 | 2.88935 |
| 15069790 | ---                                                                                      |              | <0.05 | 2.88871 |
| 14992400 | XM_001500046 // LOC100053688 // serine protease HTRA2, mitochondrial-like // --- // 100  | LOC100053688 | <0.05 | 2.88856 |
| 15076724 | ENSECAT00000018378 // LOC100050769 // b-cell receptor-associated protein 29-like // ---  | LOC100050769 | <0.05 | 2.88649 |
| 15134704 | ---                                                                                      |              | <0.05 | 2.88578 |
| 14970071 | ENSECAT00000015605 // LOC100067021 // thioredoxin-related transmembrane protein 2-like   | LOC100067021 | <0.05 | 2.88441 |
| 14981437 | ENSECAT00000012891 // ZNF354A // zinc finger protein 354A // --- // 100068186 // XM_00   | ZNF354A      | <0.05 | 2.88394 |
| 15019835 | XM_001495587 // ELP3 // elongation protein 3 homolog (S. cerevisiae) // --- // 10005468  | ELP3         | <0.05 | 2.88272 |
| 15016748 | XM_001503462 // LOC100054282 // peptidyl-prolyl cis-trans isomerase E-like // --- // 10  | LOC100054282 | <0.05 | 2.87954 |
| 15025716 | XM_001501949 // ABCE1 // ATP-binding cassette, sub-family E (OABP), member 1 // --- //   | ABCE1        | <0.05 | 2.87644 |
| 14995006 | XM_001492042 // LOC100056766 // 60S ribosomal protein L32-like // --- // 100056766 //    | LOC100056766 | <0.05 | 2.8737  |
| 15107234 | ENSECAT00000022985 // PGAP2 // post-GPI attachment to proteins 2 // --- // ---           | PGAP2        | <0.05 | 2.87194 |
| 15007474 | ENSECAT00000009408 // AGPS // alkylglycerone phosphate synthase // --- // ---            | AGPS         | <0.05 | 2.87072 |
| 15111217 | XM_001493676 // LOC100055431 // ubiquitin-like protein 5-like // --- // 100055431 // E   | LOC100055431 | <0.05 | 2.86962 |
| 14972182 | ENSECAT00000022523 // TRAF6 // TNF receptor-associated factor 6, E3 ubiquitin protein I  | TRAF6        | <0.05 | 2.86908 |
| 14991615 | ENSECAT00000024261 // EIF5B // eukaryotic translation initiation factor 5B // --- // 10  | EIF5B        | <0.05 | 2.86841 |
| 15035725 | ENSECAT0000000250 // WDR70 // WD repeat domain 70 // --- // ---                          | WDR70        | <0.05 | 2.86682 |
| 14952626 | XM_001915854 // AIM1 // absent in melanoma 1 // --- // 100066371 // ENSECAT00000015934   | AIM1         | <0.05 | 2.86467 |

|          |                     |                                                                                |              |        |         |
|----------|---------------------|--------------------------------------------------------------------------------|--------------|--------|---------|
| 15008105 | XM_001503625        | // LOC100067936 // NADH dehydrogenase [ubiquinone] 1 beta subcomplex subun     | LOC100067936 | <-0.05 | 2.86365 |
| 15098365 | ENSECAT0000009629   | // LANCL1 // LanC lantibiotic synthetase component C-like 1 (bacteri           | LANCL1       | <-0.05 | 2.86347 |
| 15049168 | ENSECAT00000026861  | // HSDL2 // hydroxysteroid dehydrogenase like 2 // --- // 100057249            | HSDL2        | <-0.05 | 2.86016 |
| 15054719 | ---                 | ---                                                                            | ---          | <-0.05 | 2.85902 |
| 15113996 | ENSECAT00000006341  | // LOC100066526 // glycolipid transfer protein-like // --- // 100066           | LOC100066526 | <-0.05 | 2.85899 |
| 14928167 | ---                 | ---                                                                            | ---          | <-0.05 | 2.85898 |
| 15047952 | ENSECAT00000025731  | // ITPK1 // inositol-tetrakisphosphate 1-kinase // --- // ---                  | ITPK1        | <-0.05 | 2.85758 |
| 14945627 | ENSECAT00000026577  | // TBC1D2B // TBC1 domain family, member 2B // --- // 100060015 //             | TBC1D2B      | <-0.05 | 2.85713 |
| 15124184 | ENSECAT000000020231 | // EIF3E // eukaryotic translation initiation factor 3, subunit E //           | EIF3E        | <-0.05 | 2.85634 |
| 15101338 | XM_001914700        | // LOC100049989 // zinc finger CCHC-type and RNA-binding motif-containing      | LOC100049989 | <-0.05 | 2.85586 |
| 15096516 | ENSECAT00000014031  | // ALG10 // asparagine-linked glycosylation 10, alpha-1,2-glucosyltr           | ALG10        | <-0.05 | 2.85585 |
| 15121187 | ---                 | ---                                                                            | ---          | <-0.05 | 2.85575 |
| 15053593 | NM_001081940        | // GBE1 // glucan (1,4-alpha-), branching enzyme 1 // --- // 100034152 //      | GBE1         | <-0.05 | 2.85551 |
| 15061761 | ---                 | ---                                                                            | ---          | <-0.05 | 2.8554  |
| 15118767 | XM_001496946        | // ZCCHC8 // zinc finger, CCHC domain containing 8 // --- // 100058826 //      | ZCCHC8       | <-0.05 | 2.85472 |
| 14976380 | ENSECAT00000025755  | // LOC100068356 // conserved oligomeric Golgi complex subunit 7-like           | LOC100068356 | <-0.05 | 2.85432 |
| 15118668 | ---                 | ---                                                                            | ---          | <-0.05 | 2.85084 |
| 15073388 | XM_001488930        | // EPRS // glutamyl-prolyl-tRNA synthetase // --- // 100050245 // ENSECAT      | EPRS         | <-0.05 | 2.85032 |
| 15001238 | XM_001489013        | // GOLGA4 // golgin A4 // --- // 100050216 // ENSECAT00000014443 // GOLGA      | GOLGA4       | <-0.05 | 2.85019 |
| 14974139 | ENSECAT00000018528  | // CPT1A // carnitine palmitoyltransferase 1A (liver) // --- // 1000           | CPT1A        | <-0.05 | 2.85012 |
| 14971870 | ENSECAT00000013475  | // LOC100055228 // tetraspanin-4-like // --- // 100055228 // XM_001            | LOC100055228 | <-0.05 | 2.84996 |
| 15035530 | ENSECAT00000012122  | // PARP8 // poly (ADP-ribose) polymerase family, member 8 // --- //            | PARP8        | <-0.05 | 2.84795 |
| 15014887 | XM_001917233        | // LOC100060927 // general transcription factor IIE subunit 1-like // ---      | LOC100060927 | <-0.05 | 2.84752 |
| 15121392 | ENSECAT00000014189  | // LOC100055036 // transcription elongation factor A protein 1-like            | LOC100055036 | <-0.05 | 2.84621 |
| 14957828 | ENSECAT00000017544  | // LOC100073201 // ralBP1-associated Eps domain-containing protein 1           | LOC100073201 | <-0.05 | 2.84326 |
| 15013076 | ENSECAT00000024846  | // LOC100071372 // n-alpha-acetyltransferase 50, NatE catalytic subu           | LOC100071372 | <-0.05 | 2.84241 |
| 15001041 | XM_001498297        | // WDR48 // WD repeat domain 48 // --- // 100068457 // ENSECAT00000020117      | WDR48        | <-0.05 | 2.84187 |
| 15009057 | XM_001487889        | // ORC4 // origin recognition complex, subunit 4 // --- // 100055921 // III E  | ORC4         | <-0.05 | 2.83973 |
| 15041011 | ENSECAT00000000477  | // LOC100056734 // protein slowmo homolog 2-like // --- // 100056734           | LOC100056734 | <-0.05 | 2.83885 |
| 15082247 | XM_001501128        | // LOC100055464 // homocysteine-responsive endoplasmic reticulum-resident      | LOC100055464 | <-0.05 | 2.83884 |
| 15027712 | NM_001256923        | // HSPA1A // heat shock 70kDa protein 1A // --- // 100050827 // AF397192       | HSPA1A       | <-0.05 | 2.83753 |
| 15046955 | ---                 | ---                                                                            | ---          | <-0.05 | 2.83744 |
| 14997130 | ENSECAT00000026712  | // LOC100065901 // uncharacterized protein KIAA1143-like // --- // 1           | LOC100065901 | <-0.05 | 2.83705 |
| 15015011 | XM_001501053        | // QTRTD1 // queuine tRNA-ribosyltransferase domain containing 1 // --- //     | QTRTD1       | <-0.05 | 2.83623 |
| 15116557 | ENSECAT00000005340  | // LOC100070107 // DNA polymerase iota-like // --- // 100070107 //             | LOC100070107 | <-0.05 | 2.8351  |
| 15128880 | XM_001502247        | // LOC100072334 // apolipoprotein O-like // --- // 100072334 // ENSECAT00      | LOC100072334 | <-0.05 | 2.83421 |
| 14946548 | ENSECAT00000020987  | // GCOM1 // GRINL1A complex locus 1 // --- // 100068476                        | GCOM1        | <-0.05 | 2.834   |
| 14995890 | AY343543            | // TKT // transketolase // --- // 100034031                                    | TKT          | <-0.05 | 2.83376 |
| 14972487 | ENSECAT00000015176  | // LOC100051744 // mitochondrial carrier homolog 2-like // --- // 10           | LOC100051744 | <-0.05 | 2.83293 |
| 14943266 | XM_001503713        | // LOC100063387 // apoptosis-inducing factor 2-like // --- // 100063387 //     | LOC100063387 | <-0.05 | 2.83144 |
| 15108508 | XM_001504389        | // LOC100068453 // mps one binder kinase activator-like 2A-like // --- //      | LOC100068453 | <-0.05 | 2.83087 |
| 15035560 | ENSECAT00000009638  | // MRPS30 // mitochondrial ribosomal protein S30 // --- // ---                 | MRPS30       | <-0.05 | 2.82891 |
| 15095274 | ENSECAT00000006674  | // LOC100054988 // BH3-interacting domain death agonist-like // ---            | LOC100054988 | <-0.05 | 2.82867 |
| 14988058 | XM_001490447        | // LOC100050737 // MIT domain-containing protein 1-like // --- // 10005073     | LOC100050737 | <-0.05 | 2.82832 |
| 14975739 | ENSECAT00000015734  | // GUSB // glucuronidase, beta // --- // 100037416 // XM_001493514             | GUSB         | <-0.05 | 2.82701 |
| 14928205 | ---                 | ---                                                                            | ---          | <-0.05 | 2.82696 |
| 14958261 | AJ010315            | // TIMP2 // TIMP metalloproteinase inhibitor 2 // --- // 100034134 // EF077283 | TIMP2        | <-0.05 | 2.82676 |
| 14999883 | XM_003363080        | // LOC100629294 // signal peptidase complex subunit 1-like // --- // 10062     | LOC100629294 | <-0.05 | 2.82514 |
| 15066947 | XM_001489101        | // GRSF1 // G-rich RNA sequence binding factor 1 // --- // 100054436 // III E  | GRSF1        | <-0.05 | 2.82451 |
| 14994788 | XM_003362531        | // LOC100050146 // cellular nucleic acid-binding protein-like // --- // 10     | LOC100050146 | <-0.05 | 2.82292 |
| 15117667 | ENSECAT00000022284  | // LOC100063639 // transcobalamin-2-like // --- // 100063639 // XM_            | LOC100063639 | <-0.05 | 2.82226 |
| 15063713 | ENSECAT00000009117  | // LOC100070366 // uncharacterized protein C10orf18-like // --- // 1           | LOC100070366 | <-0.05 | 2.82173 |
| 15028928 | ---                 | ---                                                                            | ---          | <-0.05 | 2.82108 |
| 15002662 | XM_001493058        | // LOC100060960 // transcription factor IIIA-like // --- // 100060960 //       | LOC100060960 | <-0.05 | 2.821   |
| 14967287 | XM_001504140        | // LOC100059151 // protein unc-119 homolog A-like // --- // 100059151 //       | LOC100059151 | <-0.05 | 2.81741 |
| 14958744 | XM_001492288        | // LOC100059836 // MIF4G domain-containing protein-like // --- // 10005983     | LOC100059836 | <-0.05 | 2.81665 |
| 14959493 | XM_003362531        | // LOC100054597 // MLL1/MLL complex subunit KIAA1267-like // --- // 100054     | LOC100054597 | <-0.05 | 2.81661 |
| 15121915 | ENSECAT00000021375  | // VPS13B // vacuolar protein sorting 13 homolog B (yeast) // --- //           | VPS13B       | <-0.05 | 2.81604 |
| 14984985 | XM_001503474        | // LOC100059774 // tetraatricopeptide repeat protein 1-like // --- // 10005    | LOC100059774 | <-0.05 | 2.81587 |
| 15063552 | XM_001499137        | // CDC123 // cell division cycle 123 homolog (S. cerevisiae) // --- // 100     | CDC123       | <-0.05 | 2.81521 |
| 14997632 | ENSECAT00000024825  | // NGLY1 // N-glycanase 1 // --- // 100059456 // XM_001492043 // NG            | NGLY1        | <-0.05 | 2.81449 |
| 14956503 | XM_001500685        | // LOC100071009 // ubiquitin-conjugating enzyme E2 J1-like // --- // 10007     | LOC100071009 | <-0.05 | 2.814   |
| 15069409 | XM_001499093        | // LOC100053955 // protein SLC7A6OS-like // --- // 100053955 // ENSECAT00      | LOC100053955 | <-0.05 | 2.81383 |
| 15088261 | XM_001493570        | // ZNF644 // zinc finger protein 644 // --- // 100051777 // ENSECAT000000      | ZNF644       | <-0.05 | 2.81246 |
| 15091467 | XM_003365031        | // LOC100059946 // tuftelin-like // --- // 100059946 // ENSECAT0000001160      | LOC100059946 | <-0.05 | 2.81034 |
| 15101311 | XM_001915404        | // SLC2A13 // solute carrier family 2 (facilitated glucose transporter), m     | SLC2A13      | <-0.05 | 2.80955 |
| 15058212 | XM_001494372        | // METAP2 // methionyl aminopeptidase 2 // --- // 100052132 // XM_0014943      | METAP2       | <-0.05 | 2.80895 |
| 15122482 | XM_001498132        | // LOC100057623 // NADH dehydrogenase [ubiquinone] 1 beta subcomplex subun     | LOC100057623 | <-0.05 | 2.80759 |
| 15011788 | XM_001495885        | // FXR1 // fragile X mental retardation, autosomal homolog 1 // --- // 100     | FXR1         | <-0.05 | 2.80666 |
| 14970550 | XM_001916375        | // LOC100146759 // tetraatricopeptide repeat protein 9C-like // --- // 1001    | LOC100146759 | <-0.05 | 2.80441 |
| 15046770 | ENSECAT00000008793  | // LOC100058449 // exocyst complex component 5-like // --- // 100058           | LOC100058449 | <-0.05 | 2.80425 |
| 14983486 | XM_001503567        | // LOC100073191 // stAR-related lipid transfer protein 4-like // --- // 10     | LOC100073191 | <-0.05 | 2.80391 |
| 15064836 | ENSECAT00000014815  | // LOC100053856 // nuclear factor of activated T-cells, cytoplasmic            | LOC100053856 | <-0.05 | 2.80369 |
| 15006245 | ENSECAT00000010106  | // IWS1 // IWS1 homolog (S. cerevisiae) // --- // ---                          | IWS1         | <-0.05 | 2.80352 |
| 14956739 | XM_001503881        | // USP45 // ubiquitin specific peptidase 45 // --- // 100071616 // ENSECA      | USP45        | <-0.05 | 2.80352 |
| 15090433 | XM_001491629        | // UHMK1 // U2AF homology motif (UHM) kinase 1 // --- // 100058796 // ENS      | UHMK1        | <-0.05 | 2.80292 |
| 14981651 | ENSECAT00000003803  | // LOC100058730 // UPF0498 protein KIAA1191-like // --- // 100058730           | LOC100058730 | <-0.05 | 2.80282 |
| 15047620 | XM_001492371        | // GTF2A1 // general transcription factor IIA, 1, 19/37kDa // --- // 10005     | GTF2A1       | <-0.05 | 2.80248 |
| 15134700 | ---                 | ---                                                                            | ---          | <-0.05 | 2.80234 |
| 15088939 | XM_001500154        | // LOC100070493 // TM2 domain-containing protein 1-like // --- // 10007049     | LOC100070493 | <-0.05 | 2.80136 |
| 15002429 | XM_001488592        | // PARP4 // poly (ADP-ribose) polymerase family, member 4 // --- // 100053     | PARP4        | <-0.05 | 2.80134 |
| 15127040 | XM_001917193        | // MOSPD2 // motile sperm domain containing 2 // --- // 100055695 // ENSE      | MOSPD2       | <-0.05 | 2.80099 |
| 15069423 | ENSECAT00000009199  | // LOC100054003 // chromosome transmission fidelity protein 8 homolog          | LOC100054003 | <-0.05 | 2.79977 |
| 15133906 | ENSECAT00000011997  | // LOC100058256 // filamin-A-like // --- // 100058256                          | LOC100058256 | <-0.05 | 2.79886 |
| 15135426 | ---                 | ---                                                                            | ---          | <-0.05 | 2.79825 |
| 14930417 | ---                 | ---                                                                            | ---          | <-0.05 | 2.79608 |
| 15135940 | ---                 | ---                                                                            | ---          | <-0.05 | 2.79594 |
| 15068679 | XM_001491009        | // N4BP1 // NEDD4 binding protein 1 // --- // 100057787 // ENSECAT0000002      | N4BP1        | <-0.05 | 2.79538 |
| 15032504 | XM_003363817        | // AP1M1 // adaptor-related protein complex 1, mu 1 subunit // --- // 1000     | AP1M1        | <-0.05 | 2.79432 |
| 14956385 | ENSECAT00000013411  | // SNX14 // sorting nexin 14 // --- // 100065533                               | SNX14        | <-0.05 | 2.79409 |
| 14925075 | ---                 | ---                                                                            | ---          | <-0.05 | 2.79408 |
| 15106791 | ENSECAT00000024510  | // ALG8 // asparagine-linked glycosylation 8, alpha-1,3-glucosyltran           | ALG8         | <-0.05 | 2.79402 |
| 14932053 | ---                 | ---                                                                            | ---          | <-0.05 | 2.79215 |
| 14946695 | ENSECAT00000023924  | // LOC100055314 // AP-4 complex subunit epsilon-1-like // --- // 100           | LOC100055314 | <-0.05 | 2.79213 |
| 15078932 | ENSECAT00000026029  | // LOC100068568 // muskelin-like // --- // 100068568 // XM_001500999           | LOC100068568 | <-0.05 | 2.79195 |
| 14994258 | XM_001503106        | // NCOA1 // nuclear receptor coactivator 1 // --- // 100056042 // XM_0033      | NCOA1        | <-0.05 | 2.79162 |
| 15108981 | XM_001496766        | // LOC100066525 // syntaxin-binding protein 2-like // --- // 100066525 //      | LOC100066525 | <-0.05 | 2.79113 |
| 15016465 | ENSECAT00000026685  | // LOC100065903 // transmembrane protein 53-like // --- // 100065903           | LOC100065903 | <-0.05 | 2.7898  |
| 15114735 | XM_001495246        | // LOC100059433 // GPN-loop GTPase 3-like // --- // 100059433 // ENSECAT00     | LOC100059433 | <-0.05 | 2.78939 |
| 15095534 | XM_001494601        | // LOC100051504 // NADH dehydrogenase [ubiquinone] 1 alpha subcomplex subu     | LOC100051504 | <-0.05 | 2.78931 |
| 15126627 | ---                 | ---                                                                            | ---          | <-0.05 | 2.78915 |
| 15067222 | NM_001105316        | // PPAT // phosphoribosyl pyrophosphate amidotransferase // --- // 1000538     | PPAT         | <-0.05 | 2.78822 |
| 15090762 | XM_001490503        | // LOC100056988 // myeloid cell nuclear differentiation antigen-like // --     | LOC100056988 | <-0.05 | 2.78772 |
| 15121144 | XM_001494215        | // COPS5 // COP9 constitutive photomorphogenic homolog subunit 5 (Arabidop     | COPS5        | <-0.05 | 2.78732 |
| 15122756 | ENSECAT00000014440  | // LOC100063382 // glycosylphosphatidylinositol anchor attachment 1            | LOC100063382 | <-0.05 | 2.78712 |
| 14992130 | XM_001498189        | // LOC100053006 // 39S ribosomal protein L35, mitochondrial-like // --- //     | LOC100053006 | <-0.05 | 2.78685 |

|          |                                                                                          |               |        |         |
|----------|------------------------------------------------------------------------------------------|---------------|--------|---------|
| 15099658 | NM_001163830 // ADIPOR2 // adiponectin receptor 2 // --- // 100050051 // ENSECAT000000   | ADIPOR2       | <-0.05 | 2.78628 |
| 15118895 | ENSECAT00000022871 // LOC100059129 // translation initiation factor eIF-2B subunit alpha | LOC100059129  | <-0.05 | 2.78413 |
| 15011241 | XM_001497226 // LOC100067107 // small ubiquitin-related modifier 1-like // --- // 10006  | LOC100067107  | <-0.05 | 2.78383 |
| 14969333 | ENSECAT00000017152 // FBXO3 // F-box protein 3 // --- // 100059295 // XM_001503169 //    | FBXO3         | <-0.05 | 2.78189 |
| 15105879 | ENSECAT00000014998 // TNPO2 // transportin 2 // --- // 100063482 // XM_001504888 // TN   | TNPO2         | <-0.05 | 2.78189 |
| 15084828 | ENSECAT00000020986 // LOC100054060 // major histocompatibility complex class I-related   | LOC100054060  | <-0.05 | 2.78145 |
| 15080649 | ENSECAT00000007739 // VPS41 // vacuolar protein sorting 41 homolog (S. cerevisiae) // -  | VPS41         | <-0.05 | 2.78137 |
| 14934146 | XM_001503226 // SGMS1 // sphingomyelin synthase 1 // --- // 100062484 // ENSECAT000000   | SGMS1         | <-0.05 | 2.78132 |
| 15083184 | XM_001496338 // MKRN1 // makorin ring finger protein 1 // --- // 100065893 // ENSECAT0   | MKRN1         | <-0.05 | 2.77906 |
| 15129767 | XM_001500906 // XIAP // X-linked inhibitor of apoptosis // --- // 100060870 // ENSECAT   | XIAP          | <-0.05 | 2.77902 |
| 15135002 | ---                                                                                      |               | <-0.05 | 2.77879 |
| 15074567 | XM_001492621 // ZBTB41 // zinc finger and BTB domain containing 41 // --- // 100051497   | ZBTB41        | <-0.05 | 2.77728 |
| 14983173 | ENSECAT00000022661 // RAPGEF6 // Rap guanine nucleotide exchange factor (GEF) 6 // ---   | RAPGEF6       | <-0.05 | 2.77659 |
| 15051570 | XM_001504059 // ALG2 // asparagine-linked glycosylation 2, alpha-1,3-mannosyltransferas  | ALG2          | <-0.05 | 2.77659 |
| 15098880 | XM_001495406 // FARSB // phenylalanyl-tRNA synthetase, beta subunit // --- // 100056565  | FARSB         | <-0.05 | 2.77543 |
| 14967499 | XM_001918341 // NUFIP2 // nuclear fragile X mental retardation protein interacting prot  | NUFIP2        | <-0.05 | 2.77399 |
| 14928817 | ---                                                                                      |               | <-0.05 | 2.77394 |
| 15134558 | ---                                                                                      |               | <-0.05 | 2.77387 |
| 14937368 | XM_001497645 // DENND4A // DENN/MADD domain containing 4A // --- // 100053090 // XM_00   | DENND4A       | <-0.05 | 2.77318 |
| 14956757 | ENSECAT00000026298 // LOC100066119 // cyclin-C-like // --- // 100066119 // XM_00150389   | LOC100066119  | <-0.05 | 2.77307 |
| 14964932 | XM_001499857 // HELZ // helicase with zinc finger // --- // 100053580 // ENSECAT000000   | HELZ          | <-0.05 | 2.7712  |
| 14987308 | XM_001503946 // AGGF1 // angiogenic factor with G patch and FHA domains 1 // --- // 100  | AGGF1         | <-0.05 | 2.76992 |
| 15088722 | XM_001499345 // ANKRD13C // ankyrin repeat domain 13C // --- // 100053662 // ENSECAT00   | ANKRD13C      | <-0.05 | 2.7696  |
| 15052893 | XM_001917228 // CRAT // carnitine O-acetyltransferase // --- // 100070062 // ENSECAT00   | CRAT          | <-0.05 | 2.76943 |
| 14988770 | XM_001497585 // LOC100067584 // succinyl-CoA ligase [GDP-forming] subunit alpha, mitoch  | LOC100067584  | <-0.05 | 2.76579 |
| 15069451 | ENSECAT00000021852 // LOC100067237 // uncharacterized LOC100067237 // --- // 100067237   | LOC100067237  | <-0.05 | 2.76557 |
| 14959958 | ENSECAT00000017794 // VAT1 // vesicle amine transport protein 1 homolog (T. californica  | VAT1          | <-0.05 | 2.76448 |
| 15066146 | ENSECAT00000008640 // DNAJB14 // DnaJ (Hsp40) homolog, subfamily B, member 14 // --- //  | DNAJB14       | <-0.05 | 2.76424 |
| 15003272 | XM_00336225 // LOC100050430 // succinyl-CoA ligase [ADP-forming] subunit beta, mitoch    | LOC100050430  | <-0.05 | 2.76396 |
| 15099853 | ENSECAT00000023705 // LOC100051294 // uncharacterized protein C12orf4 homolog // --- //  | LOC100051294  | <-0.05 | 2.76352 |
| 15064782 | XM_001498248 // LOC100053553 // nuclear transport factor 2-like // --- // 100053553 //   | LOC100053553  | <-0.05 | 2.76266 |
| 14940154 | XM_001489375 // LOC100054994 // dehydrogenase/reductase SDR family member 4-like // ---  | LOC100054994  | <-0.05 | 2.76234 |
| 15105599 | ENSECAT00000011541 // ACAD8 // acyl-CoA dehydrogenase family, member 8 // --- // 100072  | ACAD8         | <-0.05 | 2.76225 |
| 15089816 | ENSECAT00000012272 // LOC100054216 // syntaxin-6-like // --- // 100054216 // XM_001488   | LOC100054216  | <-0.05 | 2.76194 |
| 14999688 | XM_001491548 // APPL1 // adaptor protein, phosphotyrosine interaction, PH domain and le  | APPL1         | <-0.05 | 2.76147 |
| 15012747 | XM_001500147 // LOC100070489 // 3-hydroxyacyl-CoA dehydratase 2-like // --- // 10007048  | LOC100070489  | <-0.05 | 2.76123 |
| 14934217 | NM_001242449 // UBE2D1 // ubiquitin-conjugating enzyme E2D 1 // --- // 100062598 // EN   | UBE2D1        | <-0.05 | 2.7612  |
| 15097530 | XM_001504781 // LOC100051518 // ORM1-like protein 2-like // --- // 100051518 // ENSECA   | LOC100051518  | <-0.05 | 2.76071 |
| 15109929 | ENSECAT00000015047 // LOC100063051 // Intraflagellar transport protein 46 homolog // -   | LOC100063051  | <-0.05 | 2.76008 |
| 15119945 | XM_001496673 // ZNF24 // zinc finger protein 24 // --- // 100052725 // ENSECAT00000021   | ZNF24         | <-0.05 | 2.75997 |
| 15105278 | XM_001505067 // TBRG1 // transforming growth factor beta regulator 1 // --- // 10006418  | TBRG1         | <-0.05 | 2.75944 |
| 15074418 | ENSECAT00000010619 // LOC100056607 // RRP15-like protein-like // --- // 100056607 // X   | LOC100056607  | <-0.05 | 2.7591  |
| 15051240 | ENSECAT00000019337 // LOC100055711 // uncharacterized protein KIAA1539-like // --- // 1  | LOC100055711  | <-0.05 | 2.75841 |
| 15126705 | ---                                                                                      |               | <-0.05 | 2.75792 |
| 15057230 | ENSECAT00000011594 // ERI1 // exoribonuclease 1 // --- // 100147421 // XM_001915823 //   | ERI1          | <-0.05 | 2.75714 |
| 14992226 | ENSECAT00000029001 // LOC100067403 // trans-Golgi network integral membrane protein 1-1  | LOC100067403  | <-0.05 | 2.75644 |
| 15123526 | ENSECAT00000018083 // UBXN2B // UBX domain protein 2B // --- // ---                      | UBXN2B        | <-0.05 | 2.75484 |
| 15102326 | XM_001504543 // ATF7 // activating transcription factor 7 // --- // 100062229 // ENSE    | ATF7          | <-0.05 | 2.75468 |
| 15101931 | ENSECAT00000007770 // LASS5 // ceramide synthase 5 // --- // 100059999 // XM_001504248   | LASS5         | <-0.05 | 2.75392 |
| 15008507 | XM_001504925 // LOC100067394 // protein FAM168B-like // --- // 100067394 // ENSECAT000   | LOC100067394  | <-0.05 | 2.75336 |
| 14998428 | ---                                                                                      |               | <-0.05 | 2.75303 |
| 15057193 | XM_001495715 // LOC100058409 // dynactin subunit 6-like // --- // 100058409 // ENSECAT   | LOC100058409  | <-0.05 | 2.7526  |
| 15031488 | ENSECAT00000018050 // MOCS1 // molybdenum cofactor synthesis 1 // --- // 100065704 //    | MOCS1         | <-0.05 | 2.75257 |
| 14988179 | ENSECAT00000000093 // LOC100062047 // ankyrin repeat domain-containing protein 39-like   | LOC100062047  | <-0.05 | 2.75031 |
| 14974702 | ENSECAT000000000171 // LOC100061601 // probable palmitoyltransferase ZDHHC4-like // -    | LOC100061601  | <-0.05 | 2.75008 |
| 15035640 | XM_001496286 // LOC100065794 // UPF0600 protein C5orf51-like // --- // 100065794 // EN   | LOC100065794  | <-0.05 | 2.74974 |
| 15049923 | ENSECAT00000012147 // SLC27A4 // solute carrier family 27 (fatty acid transporter), mem  | SLC27A4       | <-0.05 | 2.74927 |
| 15119860 | XM_001495283 // TRAPPC8 // trafficking protein particle complex 8 // --- // 100052273 // | TRAPPC8       | <-0.05 | 2.74822 |
| 14928681 | ---                                                                                      |               | <-0.05 | 2.74745 |
| 14939241 | XM_001503583 // LOC100057403 // signal recognition particle 14 kDa protein-like // ---   | LOC100057403  | <-0.05 | 2.74595 |
| 15009076 | XM_001488182 // LOC100050023 // methylmalonic aciduria and homocystinuria type D homolo  | LOC100050023  | <-0.05 | 2.74584 |
| 14973472 | ENSECAT00000021404 // LOC100054275 // atlastin-3-like // --- // 100054275 // XM_001488   | LOC100054275  | <-0.05 | 2.74465 |
| 14941610 | XM_001495643 // NHLRC2 // NHL repeat containing 2 // --- // 100059070 // ENSECAT000000   | NHLRC2        | <-0.05 | 2.74216 |
| 15061854 | XM_001490463 // LOC100056911 // arylsulfatase A-like // --- // 100056911 // ENSECAT000   | LOC100056911  | <-0.05 | 2.74105 |
| 15062032 | XM_001494766 // MAP3K8 // mitogen-activated protein kinase kinase kinase 8 // --- // 10  | MAP3K8        | <-0.05 | 2.74066 |
| 14947096 | XM_001918264 // TMEM62 // transmembrane protein 62 // --- // 100056447 // ENSECAT00000   | TMEM62        | <-0.05 | 2.74049 |
| 14958435 | ENSECAT00000023874 // LOC100051178 // inactive rhomboid protein 2-like // --- // 100051  | LOC100051178  | <-0.05 | 2.73939 |
| 15036301 | DQ402987 // SDHA // succinate dehydrogenase complex, subunit A, flavoprotein (Fp) // -   | SDHA          | <-0.05 | 2.73917 |
| 14977797 | ENSECAT00000018658 // NPRL3 // nitrogen permease regulator-like 3 (S. cerevisiae) // -   | NPRL3         | <-0.05 | 2.73766 |
| 15123972 | XM_001492262 // RNF19A // ring finger protein 19A, E3 ubiquitin protein ligase // --- /  | RNF19A        | <-0.05 | 2.73693 |
| 14966080 | XM_001501874 // LOC100055406 // 39S ribosomal protein L10, mitochondrial-like // --- //  | LOC100055406  | <-0.05 | 2.73688 |
| 14928169 | ---                                                                                      |               | <-0.05 | 2.73548 |
| 15037905 | ENSECAT00000015014 // DHX35 // DEAH (Asp-Glu-Ala-His) box polypeptide 35 // --- // 1000  | DHX35         | <-0.05 | 2.73534 |
| 15071400 | XM_001916811 // LOC100058152 // RE1-silencing transcription factor-like // --- // 10005  | LOC100058152  | <-0.05 | 2.73529 |
| 15131490 | ENSECAT00000024242 // LOC100059599 // FUN14 domain-containing protein 1-like // --- //   | LOC100059599  | <-0.05 | 2.73506 |
| 15126633 | ---                                                                                      |               | <-0.05 | 2.73479 |
| 14987439 | ENSECAT00000012513 // LOC100073289 // beta-hexosaminidase subunit beta-like // --- // 1  | LOC100073289  | <-0.05 | 2.73364 |
| 15083640 | XM_001495351 // LOC100064440 // GTP-binding protein Rheb-like // --- // 100064440 // E   | LOC100064440  | <-0.05 | 2.73235 |
| 15023292 | XM_001501046 // LOC100071309 // macoilin-like // --- // 100071309 // ENSECAT0000000321   | LOC100071309  | <-0.05 | 2.731   |
| 15072515 | ENSECAT00000009087 // ACOX3 // acyl-CoA oxidase 3, pristanoyl // --- // 100056690 // X   | ACOX3         | <-0.05 | 2.72916 |
| 14970086 | ENSECAT00000019101 // CTNND1 // catenin (cadherin-associated protein), delta 1 // --- /  | CTNND1        | <-0.05 | 2.72911 |
| 15068447 | ENSECAT00000016987 // CTBP1 // C-terminal binding protein 1 // --- // 100052216 // XM_   | CTBP1         | <-0.05 | 2.72909 |
| 15058287 | ENSECAT00000014574 // NEDD1 // neural precursor cell expressed, developmentally down-re  | NEDD1         | <-0.05 | 2.72778 |
| 15005938 | ENSECAT00000028905 // ARGLU1 // arginine and glutamate rich 1 // --- // ---              | ARGLU1        | <-0.05 | 2.72744 |
| 15035018 | XM_001491054 // CDK7 // cyclin-dependent kinase 7 // --- // 100049964 // ENSECAT000000   | CDK7          | <-0.05 | 2.72538 |
| 14930497 | ---                                                                                      |               | <-0.05 | 2.72361 |
| 15033526 | ---                                                                                      |               | <-0.05 | 2.7225  |
| 15090605 | ENSECAT00000013398 // LOC100058797 // SLAM family member 7-like // --- // 100058797 //   | LOC100058797  | <-0.05 | 2.72242 |
| 14988625 | XM_001496953 // LOC100066774 // t-cell surface glycoprotein CD8 alpha chain-like // -    | LOC100066774  | <-0.05 | 2.72205 |
| 15036539 | XM_001493978 // SNX5 // sorting nexin 5 // --- // 100062401 // ENSECAT00000018594 // S   | SNX5          | <-0.05 | 2.72119 |
| 15006261 | ENSECAT00000023172 // MAP3K2 // mitogen-activated protein kinase kinase kinase 2 // -    | MAP3K2        | <-0.05 | 2.72188 |
| 15062552 | XM_001499156 // LOC100056812 // ADP-sugar pyrophosphatase-like // --- // 100056812 //    | LOC100056812  | <-0.05 | 2.72153 |
| 15017528 | XM_001504025 // LOC100056884 // wiskott-Aldrich syndrome protein family member 2-like // | LOC100056884  | <-0.05 | 2.72108 |
| 14965658 | XM_001494084 // LOC100052692 // max-like protein X-like // --- // 100052692 // XM_0014   | LOC100052692  | <-0.05 | 2.71809 |
| 15120299 | XM_001499216 // CXXC1 // CXXC finger protein 1 // --- // 100069452 // ENSECAT000000190   | CXXC1         | <-0.05 | 2.71676 |
| 15070282 | ENSECAT00000021872 // LOC1000630458 // CDGSH iron-sulfur domain-containing protein 2-lik | LOC1000630458 | <-0.05 | 2.71662 |
| 15052312 | XM_001501657 // LOC100071800 // 26S proteasome non-ATPase regulatory subunit 5-like //   | LOC100071800  | <-0.05 | 2.71641 |
| 15129374 | ---                                                                                      |               | <-0.05 | 2.71634 |
| 15128390 | ENSECAT00000002080 // LOC100066275 // protein YIPF6-like // --- // 100066275 // XM_001   | LOC100066275  | <-0.05 | 2.7162  |
| 15107050 | ENSECAT00000024371 // LOC100065545 // ras-related protein Rab-6A-like // --- // 1000655  | LOC100065545  | <-0.05 | 2.71609 |
| 15100800 | XM_001502159 // RECQL // RecQ protein-like (DNA helicase Q1-like) // --- // 100068195 // | RECQL         | <-0.05 | 2.71446 |
| 15016763 | ENSECAT00000016449 // LOC100068904 // c-Myc-binding protein-like // --- // 100068904 //  | LOC100068904  | <-0.05 | 2.71414 |
| 15076945 | XM_001495859 // LOC100051895 // synaptobrevin homolog YKT6-like // --- // 100051895 //   | LOC100051895  | <-0.05 | 2.7141  |
| 14983505 | ENSECAT00000008235 // PJA2 // praja ring finger 2, E3 ubiquitin protein ligase // --- /  | PJA2          | <-0.05 | 2.71258 |
| 15008235 | ENSECAT00000022068 // NBEAL1 // neurobeachin-like 1 // --- // ---                        | NBEAL1        | <-0.05 | 2.71136 |
| 15060549 | ENSECAT00000013639 // LOC100053117 // WASH complex subunit CCDC53-like // --- // 100053  | LOC100053117  | <-0.05 | 2.71009 |

|          |                                                                                          |              |       |         |
|----------|------------------------------------------------------------------------------------------|--------------|-------|---------|
| 15111087 | ENSECAT00000011689 // SLC44A2 // solute carrier family 44, member 2 // --- // 100055038  | SLC44A2      | <0.05 | 2.70946 |
| 15105493 | ENSECAT00000022701 // FLI1 // Friend leukemia virus integration 1 // --- // 100064591 /  | FLI1         | <0.05 | 2.70834 |
| 15126109 | ENSECAT00000004611 // LOC100630659 // UPF0545 protein C2orf39-like // --- // 100630659   | LOC100630659 | <0.05 | 2.70807 |
| 14959426 | ENSECAT00000025770 // STRADA // STE20-related kinase adaptor alpha // --- // ---         | STRADA       | <0.05 | 2.70712 |
| 14928415 | ---                                                                                      |              | <0.05 | 2.70687 |
| 14928503 | ---                                                                                      |              | <0.05 | 2.70687 |
| 15085619 | XM_001487994 // LOC100050332 // dual specificity protein phosphatase 12-like // --- //   | LOC100050332 | <0.05 | 2.70635 |
| 14948624 | ENSECAT00000013453 // LOC100057360 // sorting nexin-6-like // --- // 100057360 // XM_0   | LOC100057360 | <0.05 | 2.70476 |
| 15124457 | XM_001497638 // LOC100057464 // zinc fingers and homeobox protein 1-like // --- // 10    | LOC100057464 | <0.05 | 2.70449 |
| 14998229 | ENSECAT00000019828 // LOC100064781 // ras-related protein M-Ras-like // --- // 10006478  | LOC100064781 | <0.05 | 2.70405 |
| 14930809 | ---                                                                                      |              | <0.05 | 2.70359 |
| 15017433 | XM_001503934 // MECR // mitochondrial trans-2-enoyl-CoA reductase // --- // 100070598 /  | MECR         | <0.05 | 2.70162 |
| 15091054 | XM_001504660 // LMNA // lamin A/C // --- // 100057663 // ENSECAT00000011877 // LMNA //   | LMNA         | <0.05 | 2.70102 |
| 15084024 | ENSECAT00000020621 // LOC100051000 // ras association domain-containing protein 5-like   | LOC100051000 | <0.05 | 2.70092 |
| 15031770 | XM_001497724 // SLC35B2 // solute carrier family 35, member B2 // --- // 100067750 //    | SLC35B2      | <0.05 | 2.70031 |
| 14979576 | AY184957 // RBBP6 // retinoblastoma binding protein 6 // --- // 100033991 // ENSECAT00   | RBBP6        | <0.05 | 2.69869 |
| 15121328 | ---                                                                                      |              | <0.05 | 2.69642 |
| 14982551 | XM_001503978 // LOC100061405 // histone deacetylase 3-like // --- // 100061405 // ENSE   | LOC100061405 | <0.05 | 2.69383 |
| 14956977 | XM_001504003 // MICAL1 // microtubule associated monooxygenase, calponin and LIM domain  | MICAL1       | <0.05 | 2.69181 |
| 14960949 | ---                                                                                      |              | <0.05 | 2.69118 |
| 15033055 | ENSECAT00000001411 // TRIM23 // tripartite motif containing 23 // --- // 100050517 //    | TRIM23       | <0.05 | 2.69059 |
| 14984044 | XM_001504660 // LOC100065465 // tubulin-specific chaperone A-like // --- // 100065465 /  | LOC100065465 | <0.05 | 2.6901  |
| 15040426 | XM_001500443 // ADA // adenosine deaminase // --- // 100070773 // ENSECAT00000008811 /   | ADA          | <0.05 | 2.68904 |
| 15084742 | ENSECAT000000008540 // CEP350 // centrosomal protein 350kDa // --- // 100051014 // XM_0  | CEP350       | <0.05 | 2.68798 |
| 15093182 | XM_001497167 // LOC100064844 // ribosome production factor 1-like // --- // 100064844 /  | LOC100064844 | <0.05 | 2.68604 |
| 15028684 | ENSECAT00000003760 // LOC100067007 // 60S ribosomal protein L7-like 1-like // --- // 10  | LOC100067007 | <0.05 | 2.68472 |
| 15032479 | ENSECAT000000006719 // LOC100147248 // ras-related protein Rab-8A-like // --- // 1001472 | LOC100147248 | <0.05 | 2.68458 |
| 15020688 | XM_001502431 // LOC100063257 // histone-lysine N-methyltransferase SETD7-like // --- //  | LOC100063257 | <0.05 | 2.68446 |
| 15133154 | ENSECAT00000011124 // THOC2 // THO complex 2 // --- // 100055091 // XM_001500947 // TH   | THOC2        | <0.05 | 2.68387 |
| 14931993 | ---                                                                                      |              | <0.05 | 2.68321 |
| 14972946 | ENSECAT00000015673 // LOC100060920 // 39S ribosomal protein L16, mitochondrial-like //   | LOC100060920 | <0.05 | 2.68218 |
| 15053764 | XM_001500020 // LOC100053905 // junctional adhesion molecule B-like // --- // 100053905  | LOC100053905 | <0.05 | 2.68149 |
| 15107414 | ---                                                                                      |              | <0.05 | 2.68114 |
| 14967812 | ENSECAT00000014229 // METTL16 // methyltransferase like 16 // --- // 100060313 // XM_0   | METTL16      | <0.05 | 2.68098 |
| 14982977 | XM_001917927 // LOC100072780 // serine/threonine-protein phosphatase 2A catalytic subun  | LOC100072780 | <0.05 | 2.6804  |
| 15103994 | ENSECAT00000011477 // LOC100067852 // centrosomal protein of 57 kDa-like // --- // 1000  | LOC100067852 | <0.05 | 2.67977 |
| 15000661 | ENSECAT00000010050 // LOC100065601 // phosphatidylinositol phosphate SAC1-like // --     | LOC100065601 | <0.05 | 2.67948 |
| 15047046 | XM_001499883 // LOC100052868 // phosphatidylinositol N-acetylglucosaminyltransferase su  | LOC100052868 | <0.05 | 2.67921 |
| 15056014 | XM_001491885 // LOC100059204 // phosphatidate phosphatase PPAPDC1B-like // --- // 10005  | LOC100059204 | <0.05 | 2.67856 |
| 15132026 | XM_001490186 // LOC100056440 // PDZ domain-containing protein 11-like // --- // 1000564  | LOC100056440 | <0.05 | 2.67826 |
| 15038464 | XM_003363892 // LOC100071474 // CCAAT/enhancer-binding protein beta-like // --- // 1000  | LOC100071474 | <0.05 | 2.67663 |
| 14932770 | ENSECAT00000013781 // LOC100058684 // uncharacterized protein C10orf46-like // --- // 1  | LOC100058684 | <0.05 | 2.6762  |
| 14979825 | XM_001494381 // LOC100057847 // cytochrome b-c1 complex subunit 2, mitochondrial-like /  | LOC100057847 | <0.05 | 2.67408 |
| 15115331 | XM_001493904 // LOC100062278 // tRNA pseudouridine synthase A, mitochondrial-like // --  | LOC100062278 | <0.05 | 2.67377 |
| 15114631 | ENSECAT00000009442 // NAA25 // N(alpha)-acetyltransferase 25, NatB auxiliary subunit //  | NAA25        | <0.05 | 2.67356 |
| 14988254 | ---                                                                                      |              | <0.05 | 2.67349 |
| 14976735 | XM_003362733 // LOC100630456 // liiH domain-containing protein FOPNL-like // --- // 100  | LOC100630456 | <0.05 | 2.67227 |
| 14988650 | ENSECAT000000026571 // IMMT // inner membrane protein, mitochondrial // --- // 100067027 | IMMT         | <0.05 | 2.67264 |
| 15056135 | ENSECAT00000019124 // LOC100058323 // general transcription factor IIE subunit 2-like /  | LOC100058323 | <0.05 | 2.6713  |
| 15112721 | ---                                                                                      |              | <0.05 | 2.67117 |
| 15109773 | ---                                                                                      |              | <0.05 | 2.67105 |
| 15004923 | XM_001914963 // VPS36 // vacuolar protein sorting 36 homolog (S. cerevisiae) // --- //   | VPS36        | <0.05 | 2.6699  |
| 15110516 | XM_001917928 // SNX19 // sorting nexin 19 // --- // 100072714 // ENSECAT00000026141 //   | SNX19        | <0.05 | 2.66853 |
| 14925257 | ---                                                                                      |              | <0.05 | 2.66815 |
| 15092694 | NM_001110308 // AGL // amylo-alpha-1, 6-glucosidase, 4-alpha-glucanotransferase // ---   | AGL          | <0.05 | 2.66815 |
| 15129738 | XM_003365870 // LOC100629673 // malignant T cell-amplified sequence 1-like // --- // 10  | LOC100629673 | <0.05 | 2.66625 |
| 14992092 | XM_001496971 // RMND5A // required for meiotic nuclear division 5 homolog A (S. cerevis  | RMND5A       | <0.05 | 2.66606 |
| 14932606 | ENSECAT00000007095 // IKZF5 // IKAROS family zinc finger 5 (Pegasus) // --- // 10005813  | IKZF5        | <0.05 | 2.66605 |
| 14930015 | ---                                                                                      |              | <0.05 | 2.66544 |
| 14999682 | ENSECAT00000005601 // PDE12 // phosphodiesterase 12 // --- // 100058532 // XM_00148997   | PDE12        | <0.05 | 2.66514 |
| 15120493 | ENSECAT00000008399 // CCBE1 // collagen and calcium binding EGF domains 1 // --- // ---  | CCBE1        | <0.05 | 2.66495 |
| 15011156 | ENSECAT00000011350 // TRAK2 // trafficking protein, kinesin binding 2 // --- // 1000662  | TRAK2        | <0.05 | 2.66447 |
| 15097534 | ENSECAT00000011075 // LOC100058940 // transmembrane protein 198-B-like // --- // 100058  | LOC100058940 | <0.05 | 2.66259 |
| 15068519 | XM_001488157 // MFSDF // major facilitator superfamily domain containing 7 // --- // 10  | MFSDF        | <0.05 | 2.66198 |
| 15111388 | XM_001491421 // LOC100058462 // mediator of RNA polymerase II transcription subunit 17-  | LOC100058462 | <0.05 | 2.66173 |
| 15112763 | XM_001504936 // BTBD10 // BTB (POZ) domain containing 10 // --- // 100056058 // ENSECA   | BTBD10       | <0.05 | 2.66073 |
| 15041299 | XM_001495344 // LOC100051702 // regulator of G-protein signaling 19-like // --- // 1000  | LOC100051702 | <0.05 | 2.65994 |
| 14964957 | XM_001499941 // LOC100063689 // 26S proteasome non-ATPase regulatory subunit 12-like //  | LOC100063689 | <0.05 | 2.65974 |
| 15009273 | XM_003363256 // PRPF40A // PRP40 pre-mRNA processing factor 40 homolog A (S. cerevisiae  | PRPF40A      | <0.05 | 2.65945 |
| 15089758 | ENSECAT00000025442 // LOC100052650 // importin subunit alpha-4-like // --- // 100052650  | LOC100052650 | <0.05 | 2.6581  |
| 15003438 | ENSECAT00000008076 // LOC100060926 // uncharacterized protein KIAA0564-like // --- // 1  | LOC100060926 | <0.05 | 2.65757 |
| 14986682 | ENSECAT00000024822 // MAN2A1 // mannosidase, alpha, class 2A, member 1 // --- // 100064  | MAN2A1       | <0.05 | 2.65746 |
| 15047153 | ENSECAT00000029087 // COX16 // COX16 cytochrome c oxidase assembly homolog (S. cerevisi  | COX16        | <0.05 | 2.65704 |
| 15133943 | XM_001915515 // LOC100059443 // deoxyribonuclease-1-like 1-like // --- // 100059443 //   | LOC100059443 | <0.05 | 2.65481 |
| 14939304 | ENSECAT00000014987 // ATPBD4 // ATP binding domain 4 // --- // ---                       | ATPBD4       | <0.05 | 2.65409 |
| 15021131 | XM_001502916 // LOC100072858 // group XIIA secretory phospholipase A2-like // --- // 10  | LOC100072858 | <0.05 | 2.65404 |
| 14929829 | ---                                                                                      |              | <0.05 | 2.65396 |
| 15112116 | ENSECAT00000006616 // TRIM21 // tripartite motif containing 21 // --- // 100066782 //    | TRIM21       | <0.05 | 2.65386 |
| 14929857 | ---                                                                                      |              | <0.05 | 2.65324 |
| 15042068 | XM_001495345 // SNAPC3 // small nuclear RNA activating complex, polypeptide 3, 50kDa //  | SNAPC3       | <0.05 | 2.65321 |
| 15129595 | XM_001488038 // WDR44 // WDR repeat domain 44 // --- // 100053726 // ENSECAT00000013036  | WDR44        | <0.05 | 2.65283 |
| 15010915 | ENSECAT000000021411 // PGAP1 // post-GPI attachment to proteins 1 // --- // 100070459 // | PGAP1        | <0.05 | 2.64986 |
| 15062832 | ENSECAT000000025866 // LOC100057616 // la-related protein 4B-like // --- // 100057616 // | LOC100057616 | <0.05 | 2.64907 |
| 14937572 | XM_001918045 // LOC100067089 // probable E3 ubiquitin-protein ligase HERC1-like // ---   | LOC100067089 | <0.05 | 2.64903 |
| 14994221 | XM_001502813 // LOC100055747 // ras-related protein Rab-10-like // --- // 100055747 //   | LOC100055747 | <0.05 | 2.64895 |
| 15024860 | XM_001492944 // ENTPD4 // ectonucleoside triphosphate diphosphohydrolase 4 // --- // 10  | ENTPD4       | <0.05 | 2.64887 |
| 15079227 | ---                                                                                      |              | <0.05 | 2.64831 |
| 15044264 | XM_001494419 // LOC100049903 // 26S protease regulatory subunit 10B-like // --- // 1000  | LOC100049903 | <0.05 | 2.6483  |
| 15072859 | ENSECAT00000008955 // PIGG // phosphatidylinositol glycan anchor biosynthesis, class G   | PIGG         | <0.05 | 2.64783 |
| 14953461 | XM_001488752 // LOC100053634 // cytochrome b-c1 complex subunit Rieske, mitochondrial-I  | LOC100053634 | <0.05 | 2.64703 |
| 15096670 | XM_001488439 // IRAK4 // interleukin-1 receptor-associated kinase 4 // --- // 100054848  | IRAK4        | <0.05 | 2.64699 |
| 15059696 | ENSECAT00000011568 // TBC1D22A // TBC1 domain family, member 22A // --- // 100049975 //  | TBC1D22A     | <0.05 | 2.64661 |
| 14972436 | ---                                                                                      |              | <0.05 | 2.64621 |
| 15044573 | ENSECAT00000005976 // SLC38A6 // solute carrier family 38, member 6 // --- // 100060809  | SLC38A6      | <0.05 | 2.64481 |
| 15088124 | XM_003365092 // DNITIP2 // deoxynucleotidyltransferase, terminal, interacting protein 2  | DNITIP2      | <0.05 | 2.6446  |
| 15029913 | ENSECAT00000014717 // TPMT // thiopurine S-methyltransferase // --- // 100034066 // NM   | TPMT         | <0.05 | 2.64438 |
| 14978914 | XM_001499915 // LOC100060879 // UPF0458 protein C7orf42-like // --- // 100060879 // EN   | LOC100060879 | <0.05 | 2.64202 |
| 15092278 | ENSECAT00000009453 // CEP1 // choline/ethanolamine phosphotransferase 1 // --- // 1000   | CEP1         | <0.05 | 2.64193 |
| 15012635 | XM_001916714 // SNX4 // sorting nexin 4 // --- // 100060493 // ENSECAT00000009246 // S   | SNX4         | <0.05 | 2.64091 |
| 15071184 | ENSECAT00000025549 // LOC100054658 // mps one binder kinase activator-like 1A-like // -  | LOC100054658 | <0.05 | 2.64063 |
| 14953936 | ENSECAT000000026940 // LOC100066427 // delta(3,5)-Delta(2,4)-dienoyl-CoA isomerase, mito | LOC100066427 | <0.05 | 2.64015 |
| 14938044 | ENSECAT00000014788 // LOC100069498 // uncharacterized protein KIAA1370-like // --- // 1  | LOC100069498 | <0.05 | 2.63978 |
| 15064847 | XM_001498913 // PLA2G15 // phospholipase A2, group XV // --- // 100053908 // ENSECAT00   | PLA2G15      | <0.05 | 2.63955 |
| 15096977 | XM_001504251 // LARP4 // La ribonucleoprotein domain family, member 4 // --- // 1000523  | LARP4        | <0.05 | 2.63901 |
| 15043180 | ENSECAT00000027014 // LOC100056086 // structural maintenance of chromosomes protein 5-I  | LOC100056086 | <0.05 | 2.63811 |
| 15065741 | ENSECAT00000010217 // LOC100630367 // microtubule-associated proteins 1A/1B light chain  | LOC100630367 | <0.05 | 2.63749 |

|                                                                                                    |              |  |  |  |       |         |
|----------------------------------------------------------------------------------------------------|--------------|--|--|--|-------|---------|
| 14928391 ---                                                                                       |              |  |  |  | <0.05 | 2.63727 |
| 14928479 ---                                                                                       |              |  |  |  | <0.05 | 2.63727 |
| 15017233 ENSECAT0000022402 // LOC100070183 // protein archease-like // --- // 100070183 /// XM_    | LOC100070183 |  |  |  | <0.05 | 2.63699 |
| 15004670 NM_001081835 // HMGB1 // high mobility group box 1 // --- // 100033873 /// AB275457 //    | HMGB1        |  |  |  | <0.05 | 2.63672 |
| 14999059 XM_001493888 // LOC100058184 // probable protein BRICK1-like // --- // 100058184 /// EN   | LOC100058184 |  |  |  | <0.05 | 2.63465 |
| 14953059 ENSECAT00000010921 // LOC100073006 // probable E3 ubiquitin-protein ligase RNF217-like    | LOC100073006 |  |  |  | <0.05 | 2.63432 |
| 15128447 ENSECAT00000025237 // IGBP1 // immunoglobulin (CD79A) binding protein 1 // --- //         | IGBP1        |  |  |  | <0.05 | 2.63277 |
| 15014134 XM_001496686 // PARL // presenilin associated, rhomboid-like // --- // 100058851 /// EN   | PARL         |  |  |  | <0.05 | 2.63254 |
| 15000944                                                                                           |              |  |  |  | <0.05 | 2.63106 |
| 15061101 XM_001499842 // LOC100070178 // SUN domain-containing protein 2-like // --- // 10007017   | LOC100070178 |  |  |  | <0.05 | 2.63051 |
| 15023603 XM_001504374 // LOC100071907 // PQ-loop repeat-containing protein 2-like // --- // 1000   | LOC100071907 |  |  |  | <0.05 | 2.63025 |
| 15127245 ENSECAT00000000582 // MBTPS2 // membrane-bound transcription factor peptidase, site 2 /   | MBTPS2       |  |  |  | <0.05 | 2.62921 |
| 15075619 XM_001497220 // FUCA2 // fucosidase, alpha-L- 2, plasma // --- // 100067102 /// ENSECAT   | FUCA2        |  |  |  | <0.05 | 2.6292  |
| 15135376 ---                                                                                       |              |  |  |  | <0.05 | 2.62774 |
| 14986096 XM_001504442 // RAD50 // RAD50 homolog (S. cerevisiae) // --- // 100063198 /// ENSECAT0   | RAD50        |  |  |  | <0.05 | 2.62752 |
| 14994794 XM_001488818 // LOC100050214 // pre-mRNA-splicing factor ISY1 homolog // --- // 1000502   | LOC100050214 |  |  |  | <0.05 | 2.62735 |
| 15063055 XM_001495933 // YME1L1 // YME1-like 1 (S. cerevisiae) // --- // 100065311 /// ENSECAT00   | YME1L1       |  |  |  | <0.05 | 2.62577 |
| 15094937 ENSECAT00000017623 // LRRFIP1 // leucine rich repeat (in FLII) interacting protein 1 //   | LRRFIP1      |  |  |  | <0.05 | 2.62526 |
| 15004441 XM_001489625 // EFHA1 // EF-hand domain family, member A1 // --- // 100055452 /// ENSE    | EFHA1        |  |  |  | <0.05 | 2.62495 |
| 15020540 ENSECAT000000025178 // OTUD4 // OTU domain containing 4 // --- // 100070999 /// XM_00150  | OTUD4        |  |  |  | <0.05 | 2.62484 |
| 14951584 ---                                                                                       |              |  |  |  | <0.05 | 2.62357 |
| 15069886 XM_001502034 // LOC100069947 // m-phase phosphoprotein 6-like // --- // 100069947 /// E   | LOC100069947 |  |  |  | <0.05 | 2.62339 |
| 15028988 XM_001502478 // LOC100055574 // cell division cycle 5-like protein-like // --- // 10005   | LOC100055574 |  |  |  | <0.05 | 2.62329 |
| 14956862 XM_001501777 // PREP // prolyl endopeptidase // --- // 100071926 /// ENSECAT00000025507   | PREP         |  |  |  | <0.05 | 2.62312 |
| 14925223 ---                                                                                       |              |  |  |  | <0.05 | 2.62148 |
| 15012829 XM_001502137 // LOC100060695 // coiled-coil domain-containing protein 58-like // --- //   | LOC100060695 |  |  |  | <0.05 | 2.62122 |
| 15007594 ENSECAT00000013076 // SSFA2 // sperm specific antigen 2 // --- // 100053992               | SSFA2        |  |  |  | <0.05 | 2.62099 |
| 14960950                                                                                           |              |  |  |  | <0.05 | 2.62081 |
| 15135030 ---                                                                                       |              |  |  |  | <0.05 | 2.62077 |
| 14984544 XM_001498575 // LOC100068758 // eukaryotic translation initiation factor 4E type 1B-lik   | LOC100068758 |  |  |  | <0.05 | 2.62074 |
| 15038433 XM_001501184 // SLC9A8 // solute carrier family 9, subfamily A (NHE8, cation proton ant   | SLC9A8       |  |  |  | <0.05 | 2.61937 |
| 14948784 ENSECAT00000012263 // LOC100051031 // trafficking protein particle subunit 6B-1           | LOC100051031 |  |  |  | <0.05 | 2.61825 |
| 14965457 ENSECAT00000026227 // G6PC3 // glucose 6 phosphatase, catalytic, 3 // --- // 100064862    | G6PC3        |  |  |  | <0.05 | 2.61722 |
| 15028922                                                                                           |              |  |  |  | <0.05 | 2.61656 |
| 15011051 ENSECAT00000021847 // AOX1 // aldehyde oxidase 1 // --- // 100147243 /// ENSECAT00000002  | AOX1         |  |  |  | <0.05 | 2.61423 |
| 15131220 ENSECAT00000018502 // TAB3 // TGF-beta activated kinase 1/3/4 binding protein 3 // -      | TAB3         |  |  |  | <0.05 | 2.61137 |
| 15116025 ENSECAT00000021625 // IMPACT // Impact homolog (mouse) // --- // ---                      | IMPACT       |  |  |  | <0.05 | 2.61126 |
| 15091689 XM_001489373 // LOC100058935 // 28S ribosomal protein S21, mitochondrial-like // --- //   | LOC100058935 |  |  |  | <0.05 | 2.61193 |
| 14947054 XM_001503141 // TUBGCP4 // tubulin, gamma complex associated protein 4 // --- // 100056   | TUBGCP4      |  |  |  | <0.05 | 2.60939 |
| 15072301 ENSECAT00000008984 // CPEB2 // cytoplasmic polyadenylation element binding protein 2 //   | CPEB2        |  |  |  | <0.05 | 2.60897 |
| 15126634                                                                                           |              |  |  |  | <0.05 | 2.6087  |
| 15004969 ENSECAT00000015107 // LOC100054469 // ribonuclease H2 subunit B-like // --- // 10005446   | LOC100054469 |  |  |  | <0.05 | 2.60846 |
| 15090624 ENSECAT00000009997 // NCSTN // nicastrin // --- // 100058515 /// XM_001504431 // NCSTN    | NCSTN        |  |  |  | <0.05 | 2.60825 |
| 15133857 ENSECAT00000024419 // HCFC1 // host cell factor C1 (VP16-accessory protein) // --- // -   | HCFC1        |  |  |  | <0.05 | 2.60746 |
| 15033387 XM_001495595 // LOC100064807 // polyadenylate-binding protein-interacting protein 1-lik   | LOC100064807 |  |  |  | <0.05 | 2.60742 |
| 15120169 AB071949 // SMAD2 // SMAD family member 2 // --- // 100033843                             | SMAD2        |  |  |  | <0.05 | 2.606   |
| 15092153 XM_001495327 // LRIG2 // leucine-rich repeats and immunoglobulin-like domains 2 // ---    | LRIG2        |  |  |  | <0.05 | 2.60581 |
| 15042677 ENSECAT00000008136 // LOC100063182 // putative DNA repair and recombination protein RAD   | LOC100063182 |  |  |  | <0.05 | 2.6057  |
| 14927767 ---                                                                                       |              |  |  |  | <0.05 | 2.60455 |
| 14953805 ENSECAT00000024380 // ZNF91 // zinc finger protein 91 // --- // 100062418 /// XM_001493   | ZNF91        |  |  |  | <0.05 | 2.60432 |
| 14936123 ENSECAT00000025885 // LOC100069456 // AP-3 complex subunit sigma-2-like // --- // 10006   | LOC100069456 |  |  |  | <0.05 | 2.60413 |
| 15022161 XM_001916408 // LOC100067336 // nuclease-sensitive element-binding protein 1-like // -    | LOC100067336 |  |  |  | <0.05 | 2.60391 |
| 15002764 XM_001495151 // B3GALT1 // beta 1, 3-galactosyltransferase-like // --- // 100064175 ///   | B3GALT1      |  |  |  | <0.05 | 2.60319 |
| 14926375 ---                                                                                       |              |  |  |  | <0.05 | 2.60297 |
| 15073653 ENSECAT00000008088 // PTPRC // protein tyrosine phosphatase, receptor type, C // --- //   | PTPRC        |  |  |  | <0.05 | 2.60261 |
| 14985663                                                                                           |              |  |  |  | <0.05 | 2.60237 |
| 15004807 XM_001495632 // LOC100062531 // protein FAM48A-like // --- // 100062531 /// ENSECAT0000   | LOC100062531 |  |  |  | <0.05 | 2.60111 |
| 15092355 XM_001495694 // AHCYL1 // adenylylhomocysteinase-like 1 // --- // 100058372 /// ENSECAT   | AHCYL1       |  |  |  | <0.05 | 2.60038 |
| 14989028 ENSECAT00000007059 // LOC100049885 // TP53RK-binding protein-like // --- // 100049885 //  | LOC100049885 |  |  |  | <0.05 | 2.60035 |
| 15012792 XM_001500212 // HSPBAP1 // HSPB (heat shock 27kDa) associated protein 1 // --- // 10007   | HSPBAP1      |  |  |  | <0.05 | 2.60002 |
| 15059038 XM_001501206 // EIF3L // eukaryotic translation initiation factor 3, subunit L // --- //  | EIF3L        |  |  |  | <0.05 | 2.59948 |
| 15097922 ENSECAT00000014187 // LOC100053518 // phosphatidylinositol-4-kinase type-2                | LOC100053518 |  |  |  | <0.05 | 2.59853 |
| 15075233 ---                                                                                       |              |  |  |  | <0.05 | 2.59822 |
| 14941009 ENSECAT00000026311 // LOC100051737 // serine/threonine-protein phosphatase 2A 55 kDa re   | LOC100051737 |  |  |  | <0.05 | 2.59681 |
| 14942165 XM_001500003 // LOC100060384 // sideroflexin-3-like // --- // 100060384 /// ENSECAT0000   | LOC100060384 |  |  |  | <0.05 | 2.59665 |
| 15065723 ENSECAT00000016408 // IRF8 // interferon regulatory factor 8 // --- // 100056218 /// XM   | IRF8         |  |  |  | <0.05 | 2.59623 |
| 14994518 ENSECAT00000016692 // KLF11 // Kruppel-like factor 11 // --- // 100072433                 | KLF11        |  |  |  | <0.05 | 2.59437 |
| 15111336                                                                                           |              |  |  |  | <0.05 | 2.59362 |
| 14987398 ENSECAT00000016002 // POLK // polymerase (DNA directed) kappa // --- // 100065534 /// X   | POLK         |  |  |  | <0.05 | 2.59358 |
| 15016802 ENSECAT000000021978 // INPP5B // inositol polyphosphate-5-phosphatase, 75kDa // --- // 1  | INPP5B       |  |  |  | <0.05 | 2.59311 |
| 15034955 XM_001500904 // ATP13A1 // ATPase type 13A1 // --- // 100071205 /// ENSECAT00000022204    | ATP13A1      |  |  |  | <0.05 | 2.59309 |
| 15104370 ENSECAT00000018671 // LOC100630891 // adrenodoxin, mitochondrial-like // --- // 1006308   | LOC100630891 |  |  |  | <0.05 | 2.59255 |
| 15047222 XM_001489361 // NUMB // numb homolog (Drosophila) // --- // 100050235 /// XM_001489322    | NUMB         |  |  |  | <0.05 | 2.59222 |
| 14934134 ---                                                                                       |              |  |  |  | <0.05 | 2.58953 |
| 15081362 ENSECAT00000018262 // KRIT1 // KRIT1, ankyrin repeat containing // --- // 100050998 ///   | KRIT1        |  |  |  | <0.05 | 2.58931 |
| 14986673 ENSECAT000000023748 // LOC100064665 // solute carrier family 25 member 46-like // --- //  | LOC100064665 |  |  |  | <0.05 | 2.58919 |
| 14975063 XM_001505046 // LOC100068657 // COP9 signalosome complex subunit 6-like // --- // 10006   | LOC100068657 |  |  |  | <0.05 | 2.58671 |
| 15121776 ENSECAT00000022027 // INTS8 // integrator complex subunit 8 // --- // 100055266           | INTS8        |  |  |  | <0.05 | 2.58625 |
| 15030618                                                                                           |              |  |  |  | <0.05 | 2.58534 |
| 15064965 XM_001497135 // SNTB2 // syntrophin, beta 2 (dystrophin-associated protein A1, 59kDa, b   | SNTB2        |  |  |  | <0.05 | 2.58434 |
| 15126186 ENSECAT00000011610 // LOC100064665 // transmembrane protein 19-like // --- // 100064665   | LOC100064665 |  |  |  | <0.05 | 2.5843  |
| 14961689 ENSECAT00000026830 // LOC100071540 // c-C motif chemokine 15-like // --- // 100071540 //  | LOC100071540 |  |  |  | <0.05 | 2.58292 |
| 14961158 XM_001917699 // LOC100070071 // luc7-like protein 3-like // --- // 100070071 /// ENSECA   | LOC100070071 |  |  |  | <0.05 | 2.58273 |
| 15020243 ENSECAT000000021241 // LOC100069500 // cathepsin O-like // --- // 100069500 /// XM_00149  | LOC100069500 |  |  |  | <0.05 | 2.58222 |
| 15130398 XM_001491684 // LOC100058868 // ATP-binding cassette sub-family D member 1-like // ---    | LOC100058868 |  |  |  | <0.05 | 2.58129 |
| 15045243 XM_001490424 // LOC100050909 // protein lin-52 homolog // --- // 100050909 /// ENSECAT0   | LOC100050909 |  |  |  | <0.05 | 2.58017 |
| 14997512 XM_001917517 // LOC100056767 // cytoplasmic dynein 1 light intermediate chain 1-like // - | LOC100056767 |  |  |  | <0.05 | 2.5796  |
| 15073553 XM_001490824 // TROVE2 // TROVE domain family, member 2 // --- // 100051140 /// ENSECAT   | TROVE2       |  |  |  | <0.05 | 2.57843 |
| 14931279 ---                                                                                       |              |  |  |  | <0.05 | 2.57709 |
| 15087182 XM_001501227 // LOC100059997 // vesicle-trafficking protein SEC22b-like // --- // 10005   | LOC100059997 |  |  |  | <0.05 | 2.57612 |
| 14959829 XM_001490397 // ATXN7L3 // ataxin 7-like 3 // --- // 100064752 /// XM_003362543 // ATXN   | ATXN7L3      |  |  |  | <0.05 | 2.57596 |
| 14929325 ---                                                                                       |              |  |  |  | <0.05 | 2.57524 |
| 15131052 ENSECAT00000026569 // CXorf23 // chromosome X open reading frame 23 // --- // ---         | CXorf23      |  |  |  | <0.05 | 2.57324 |
| 15063820 XM_001501531 // ZMYND11 // zinc finger, MYND-type containing 11 // --- // 100057731 ///   | ZMYND11      |  |  |  | <0.05 | 2.57275 |
| 14999463 XM_001493702 // GXYLT2 // glucosyl xylosyltransferase 2 // --- // 100061938 /// ENSECA    | GXYLT2       |  |  |  | <0.05 | 2.57087 |
| 14925241 ---                                                                                       |              |  |  |  | <0.05 | 2.57078 |
| 14941158 XM_001490606 // LOC100057158 // BRIS complex subunit Abro1-like // --- // 100057158 //    | LOC100057158 |  |  |  | <0.05 | 2.57023 |
| 15004279 XM_001490063 // CDC16 // cell division cycle 16 homolog (S. cerevisiae) // --- // 10006   | CDC16        |  |  |  | <0.05 | 2.56909 |
| 14954133 XM_001498028 // LOC100068145 // flavin reductase-like // --- // 100068145 /// ENSECAT00   | LOC100068145 |  |  |  | <0.05 | 2.56888 |
| 15068209 ENSECAT00000005488 // TBC1D14 // TBC1 domain family, member 14 // --- // 100070312 ///    | TBC1D14      |  |  |  | <0.05 | 2.56803 |
| 15026725 ENSECAT00000028958 // LOC100061589 // u11/U12 small nuclear ribonucleoprotein 48 kDa pr   | LOC100061589 |  |  |  | <0.05 | 2.56693 |
| 15034634 ENSECAT00000028973 // LOC100069519 // UPF0608 protein C19orf42 homolog // --- // 100060   | LOC100069519 |  |  |  | <0.05 | 2.56687 |
| 15049846 XM_001917182 // LOC100070437 // cyclin-dependent kinase 9-like // --- // 100070437 ///    | LOC100070437 |  |  |  | <0.05 | 2.56677 |
| 15088593 ENSECAT00000011906 // ZZZ3 // zinc finger, ZZ-type containing 3 // --- // 100053222 ///   | ZZZ3         |  |  |  | <0.05 | 2.56512 |
| 14968428                                                                                           |              |  |  |  | <0.05 | 2.5644  |
| 15012113 XM_001498641 // VPS8 // vacuolar protein sorting 8 homolog (S. cerevisiae) // --- // 10   | VPS8         |  |  |  | <0.05 | 2.56304 |

|          |                    |              |                                                                        |                       |              |        |         |
|----------|--------------------|--------------|------------------------------------------------------------------------|-----------------------|--------------|--------|---------|
| 15062385 | XM_001498178       | LOC100056170 | // protein FAM188A-like // --- // 100056170                            | /// ENSECAT000        | LOC100056170 | <-0.05 | 2.56273 |
| 15069781 |                    |              |                                                                        |                       |              | <-0.05 | 2.5624  |
| 15122053 | ENSECAT00000012028 | /// DCAF13   | /// DDB1 and CUL4 associated factor 13 // --- // 100062586             |                       | DCAF13       | <-0.05 | 2.56222 |
| 15099390 | XM_001500579       | LOC100057698 | /// NADH dehydrogenase [ubiquinone] 1 alpha subcomplex subu            |                       | LOC100057698 | <-0.05 | 2.56201 |
| 15121164 | XM_001494625       | /// VCP1P1   | /// valosin containing protein (p97)/p47 complex interacting prot      |                       | VCP1P1       | <-0.05 | 2.56191 |
| 15130496 | ---                |              |                                                                        |                       |              | <-0.05 | 2.5618  |
| 14933451 | ENSECAT00000007996 | /// CHUK     | /// conserved helix-loop-helix ubiquitous kinase // --- // 10          |                       | CHUK         | <-0.05 | 2.56063 |
| 14975199 | XM_001505059       | MOSPD3       | /// motile sperm domain containing 3 // --- // 100067442               | /// ENSE              | MOSPD3       | <-0.05 | 2.55958 |
| 15006197 | XM_001504934       | AMMECR1L     | /// AMMECR1L // AMMECR1L // AMMECR1L // AMMECR1L // AMMECR1L           |                       | AMMECR1L     | <-0.05 | 2.55952 |
| 15005161 | XM_001491491       | LOC100050971 | /// general transcription factor IIF subunit 2-like // ---             |                       | LOC100050971 | <-0.05 | 2.55746 |
| 15067652 | ENSECAT00000004810 | /// RBM47    | /// RNA binding motif protein 47 // --- // ---                         |                       | RBM47        | <-0.05 | 2.55606 |
| 14925637 | ---                |              |                                                                        |                       |              | <-0.05 | 2.55591 |
| 14945899 | ENSECAT00000006078 | /// PML      | /// promyelocytic leukemia // --- // 100062744                         | /// XM_00149324       | PML          | <-0.05 | 2.55582 |
| 15086701 | NM_001163867       | S100A10      | /// S100 calcium binding protein A10 // --- // 100034012               | /// ENS               | S100A10      | <-0.05 | 2.55396 |
| 15030268 | XM_001492536       | TRIM27       | /// tripartite motif containing 27 // --- // 100060192                 | /// ENSECA            | TRIM27       | <-0.05 | 2.55382 |
| 15069779 | XM_003364638       | KARS         | /// lysyl-tRNA synthetase // --- // 100055335                          | /// XM_001501578      | KARS         | <-0.05 | 2.55331 |
| 14932744 | XM_001496462       | EIF3A        | /// eukaryotic translation initiation factor 3, subunit A // ---       |                       | EIF3A        | <-0.05 | 2.5526  |
| 15066743 | XM_001916000       | LOC100051138 | /// nucleolar protein Nup54-like // --- // 10005                       |                       | LOC100051138 | <-0.05 | 2.55236 |
| 14957549 | ENSECAT00000026671 | /// MED23    | /// mediator complex subunit 23 // --- // 100067556                    |                       | MED23        | <-0.05 | 2.55131 |
| 15044384 | XM_001491495       | LOC100058576 | /// uncharacterized LOC100058576 // --- // 100058576                   | /// EN                | LOC100058576 | <-0.05 | 2.55108 |
| 15064558 | XM_001496846       | LOC100065750 | /// UPF0183 protein C16orf70-like // --- // 100065750                  | /// E                 | LOC100065750 | <-0.05 | 2.55004 |
| 14991186 | ENSECAT00000005716 | LOC100072837 | /// 1,2-dihydroxy-3-keto-5-methylthiopentene dioxigen                  |                       | LOC100072837 | <-0.05 | 2.54971 |
| 15121816 | ENSECAT00000017216 | LOC100059691 | /// phosphatidylserine synthase 1-like // --- // 1000                  |                       | LOC100059691 | <-0.05 | 2.54899 |
| 14950206 | XM_001499336       | LOC100068274 | /// u1 small nuclear ribonucleoprotein A-like // --- // 100            |                       | LOC100068274 | <-0.05 | 2.548   |
| 15000943 | ENSECAT00000028989 | LOC100067962 | /// 60S ribosomal protein L14-like // --- // 10006796                  |                       | LOC100067962 | <-0.05 | 2.54787 |
| 15026455 | ENSECAT00000006504 | LOC100073027 | /// aminoacyl tRNA synthase complex-interacting multi                  |                       | LOC100073027 | <-0.05 | 2.54784 |
| 15056407 | ENSECAT00000020946 | LOC100057615 | /// UPF0501 protein KIAA1430 homolog // --- // 100057                  |                       | LOC100057615 | <-0.05 | 2.54755 |
| 15122873 | ENSECAT00000002701 | LOC100071709 | /// peroxiredoxin-1-like // --- // 100071709                           | /// XM_0              | LOC100071709 | <-0.05 | 2.54671 |
| 14982994 | ENSECAT00000013217 | LOC100062974 | /// voltage-dependent anion-selective channel protein                  |                       | LOC100062974 | <-0.05 | 2.54655 |
| 15075942 | XM_001499464       | PHF10        | /// PHD finger protein 10 // --- // 100049916                          | /// ENSECAT000000202  | PHF10        | <-0.05 | 2.54607 |
| 15047924 | ENSECAT00000016559 | LOC100053162 | /// ataxin-3-like // --- // 100053162                                  | /// XM_00149703       | LOC100053162 | <-0.05 | 2.54549 |
| 15006926 | ENSECAT00000016745 | MARCH7       | /// membrane-associated ring finger (C3HC4) 7, E3 ubiquitin            |                       | MARCH7       | <-0.05 | 2.54475 |
| 15013371 | AY246739           | ZBTB11       | /// zinc finger and BTB domain containing 11 // --- // 100072181       | ///                   | ZBTB11       | <-0.05 | 2.54391 |
| 15060742 |                    |              |                                                                        |                       |              | <-0.05 | 2.54375 |
| 14988191 | XM_001492041       | LOC100051330 | /// VIP36-like protein-like // --- // 100051330                        | /// ENSECAT           | LOC100051330 | <-0.05 | 2.54368 |
| 15087571 | XM_001498901       | ST7L         | /// suppression of tumorigenicity 7 like // --- // 100059051           | /// EN                | ST7L         | <-0.05 | 2.54333 |
| 14930003 | ---                |              |                                                                        |                       |              | <-0.05 | 2.5415  |
| 15127896 | ---                |              |                                                                        |                       |              | <-0.05 | 2.54141 |
| 14980147 | ENSECAT00000003256 | /// MKL2     | /// MKL/myocardin-like 2 // --- // ---                                 |                       | MKL2         | <-0.05 | 2.54044 |
| 15111156 | ENSECAT00000014969 | ICAM1        | /// intercellular adhesion molecule 1 // --- // ---                    |                       | ICAM1        | <-0.05 | 2.53897 |
| 15097390 | ENSECAT00000016276 | NCKAP1L      | /// NCK-associated protein 1-like // --- // 100062541                  |                       | NCKAP1L      | <-0.05 | 2.53866 |
| 14932115 | ---                |              |                                                                        |                       |              | <-0.05 | 2.53835 |
| 15091950 | ENSECAT00000021179 | MAN1A2       | /// mannosidase, alpha, class 1A, member 2 // --- // ---               |                       | MAN1A2       | <-0.05 | 2.53798 |
| 15060461 | XM_001496669       | UHRF1BP1L    | /// UHRF1 binding protein 1-like // --- // 100066380                   | /// ENSECA            | UHRF1BP1L    | <-0.05 | 2.53777 |
| 15074200 | XM_001489242       | LOC100054462 | /// histone H3.3-like // --- // 100054462                              | /// ENSECAT000000     | LOC100054462 | <-0.05 | 2.53547 |
| 14998509 | XM_003363113       | SELT         | /// selenoprotein T // --- // 100057206                                | /// ENSECAT0000002127 | SELT         | <-0.05 | 2.53518 |
| 14983452 | ENSECAT00000007807 | LOC100073183 | /// receptor expression-enhancing protein 5-like // -                  |                       | LOC100073183 | <-0.05 | 2.53501 |
| 15089612 | ENSECAT00000014284 | RFWD2        | /// ring finger and WD repeat domain 2, E3 ubiquitin protein           |                       | RFWD2        | <-0.05 | 2.53459 |
| 14932655 | ENSECAT00000012836 | LOC100064881 | /// arginyl-tRNA-protein transferase 1-like // -                       |                       | LOC100064881 | <-0.05 | 2.53392 |
| 14956511 | XM_001500697       | RRAGD        | /// Ras-related GTP binding D // --- // 100071018                      | /// ENSECAT000000     | RRAGD        | <-0.05 | 2.53313 |
| 14979289 | EU881921           | ITGAL        | /// integrin, alpha L (antigen CD11A (p180), lymphocyte function-assoc |                       | ITGAL        | <-0.05 | 2.5328  |
| 15105694 | ENSECAT00000021327 | DNAJB1       | /// DnaJ (Hsp40) homolog, subfamily B, member 1 // --- // -            |                       | DNAJB1       | <-0.05 | 2.53241 |
| 15091393 | ENSECAT00000021710 | LOC100056434 | /// SNARE-associated protein Snapin-like // --- // 10                  |                       | LOC100056434 | <-0.05 | 2.53203 |
| 14957406 | XM_0015003134      | LOC100073017 | /// HD domain-containing protein 2-like // --- // 100073017            |                       | LOC100073017 | <-0.05 | 2.53146 |
| 15126677 | XM_001500534       | LOC100070853 | /// leucine-rich repeat-containing protein 58-like // ---              |                       | LOC100070853 | <-0.05 | 2.53112 |
| 15073535 | NM_001081939       | RGS1         | /// regulator of G-protein signaling 1 // --- // 100034151             | /// ENSE              | RGS1         | <-0.05 | 2.53093 |
| 15028924 |                    |              |                                                                        |                       |              | <-0.05 | 2.53084 |
| 15121653 | XM_001488342       | LOC100052944 | /// OTU domain-containing protein 6B-like // --- // 1000529            |                       | LOC100052944 | <-0.05 | 2.53047 |
| 15069839 | ENSECAT00000029000 | LOC100629755 | /// glycine cleavage system H protein, mitochondrial-                  |                       | LOC100629755 | <-0.05 | 2.52973 |
| 15004871 | ENSECAT00000018650 | LOC100066403 | /// uncharacterized protein C13orf23-like // --- // 10                 |                       | LOC100066403 | <-0.05 | 2.52849 |
| 15082309 | ENSECAT00000012449 | THAP5        | /// THAP domain containing 5 // --- // 100070659                       | /// XM_0015           | THAP5        | <-0.05 | 2.52637 |
| 15071656 | ENSECAT00000025177 | LOC100061309 | /// SLAIN motif-containing protein 2-like // --- // 1                  |                       | LOC100061309 | <-0.05 | 2.52612 |
| 14992990 | XM_001495848       | VRK2         | /// vaccinia related kinase 2 // --- // 100052238                      | /// ENSECAT000000     | VRK2         | <-0.05 | 2.52579 |
| 14949449 | XM_001915953       | LOC100059603 | /// transmembrane protein 147-like // --- // 100059603                 |                       | LOC100059603 | <-0.05 | 2.52574 |
| 14969531 | XM_001489510       | TTC17        | /// tetratricopeptide repeat domain 17 // --- // 100055237             | /// ENS               | TTC17        | <-0.05 | 2.52409 |
| 14937462 | XM_001498202       | CLPX         | /// ClpX caseinolytic peptidase X homolog (E. coli) // --- // 10005    |                       | CLPX         | <-0.05 | 2.52409 |
| 15091101 | XM_001499126       | LOC100057427 | /// 28S ribosomal protein S29, mitochondrial-like // ---               |                       | LOC100057427 | <-0.05 | 2.52363 |
| 15028907 | ENSECAT00000014451 | TMEM63B      | /// transmembrane protein 63B // --- // 100067695                      |                       | TMEM63B      | <-0.05 | 2.52336 |
| 14990912 | ENSECAT00000024027 | SMC6         | /// structural maintenance of chromosomes 6 // --- // 1000720          |                       | SMC6         | <-0.05 | 2.52279 |
| 15131421 | ---                |              |                                                                        |                       |              | <-0.05 | 2.52208 |
| 14947663 | XM_001918315       | SLC12A6      | /// solute carrier family 12 (potassium/chloride transporters),        |                       | SLC12A6      | <-0.05 | 2.52139 |
| 15123833 | XM_001489304       | LOC100055169 | /// protein virilizer homolog // --- // 100055169                      | /// ENSECA            | LOC100055169 | <-0.05 | 2.52079 |
| 14982984 | XM_001504404       | LOC100062946 | /// s-phase Kinase-associated protein 1-like // --- // 1000            |                       | LOC100062946 | <-0.05 | 2.51976 |
| 15096021 | XM_001501444       | DDX47        | /// DEAD (Asp-Glu-Ala-Asp) box polypeptide 47 // --- // 100063569      |                       | DDX47        | <-0.05 | 2.51906 |
| 14985439 | XM_003362796       | LOC100061029 | /// transcription elongation regulator 1-like // --- // 100            |                       | LOC100061029 | <-0.05 | 2.51871 |
| 14943332 | XM_001502798       | LOC100072758 | /// uncharacterized LOC100072758 // --- // 100072758                   | /// EN                | LOC100072758 | <-0.05 | 2.51862 |
| 15069337 | XM_001498476       | LOC100066381 | /// proteasome subunit beta type-10-like // --- // 10006638            |                       | LOC100066381 | <-0.05 | 2.5186  |
| 14978073 | ENSECAT00000017355 | ZNF12        | /// zinc finger protein 12 // --- // ---                               | /// ENSECAT00000017   | ZNF12        | <-0.05 | 2.51703 |
| 15011129 | ENSECAT00000015574 | LOC100067910 | /// protein FAM126B-like // --- // 100067910                           | /// XM_0              | LOC100067910 | <-0.05 | 2.51668 |
| 15043871 | XM_001498912       | TOPORS       | /// topoisomerase I binding, arginine/serine-rich, E3 ubiquitin p      |                       | TOPORS       | <-0.05 | 2.51642 |
| 15080173 | ENSECAT00000009183 | PTPN12       | /// protein tyrosine phosphatase, non-receptor type 12 // -            |                       | PTPN12       | <-0.05 | 2.51565 |
| 14966407 | ---                |              |                                                                        |                       |              | <-0.05 | 2.51545 |
| 14937499 | XM_001498388       | LOC100053578 | /// maspardin-like // --- // 100053578                                 | /// ENSECAT000000135  | LOC100053578 | <-0.05 | 2.51497 |
| 15050157 | XM_001499731       | LOC100070047 | /// serine/threonine-protein phosphatase 2A activator-like             |                       | LOC100070047 | <-0.05 | 2.5148  |
| 15009979 | XM_001495258       | SP3          | /// Sp3 transcription factor // --- // 100064317                       | /// ENSECAT00000014   | SP3          | <-0.05 | 2.51469 |
| 15001456 | ENSECAT00000022248 | LOC100058489 | /// COX assembly mitochondrial protein homolog // ---                  |                       | LOC100058489 | <-0.05 | 2.51449 |
| 14941556 | ENSECAT00000012003 | FAM160B1     | /// family with sequence similarity 160, member B1 // ---              |                       | FAM160B1     | <-0.05 | 2.51436 |
| 15055157 | XM_001494782       | GCFC1        | /// GC-rich sequence DNA-binding factor 1 // --- // 100063627          | ///                   | GCFC1        | <-0.05 | 2.51397 |
| 15104341 | XM_001499568       | DDX10        | /// DEAD (Asp-Glu-Ala-Asp) box polypeptide 10 // --- // 100069845      |                       | DDX10        | <-0.05 | 2.5139  |
| 14948567 | ENSECAT00000017428 | HEATR5A      | /// HEAT repeat containing 5A // --- // ---                            |                       | HEATR5A      | <-0.05 | 2.51331 |
| 15054879 | XM_001496687       | LOC100066408 | /// 39S ribosomal protein L39, mitochondrial-like // ---               |                       | LOC100066408 | <-0.05 | 2.51242 |
| 14989361 | ENSECAT00000018270 | CCT4         | /// chaperonin containing TCP1, subunit 4 (delta) // --- // 1          |                       | CCT4         | <-0.05 | 2.50754 |
| 14930137 | ---                |              |                                                                        |                       |              | <-0.05 | 2.50682 |
| 15093263 | XM_001498098       | LOC100053123 | /// dnaJ homolog subfamily B member 4-like // --- // 100053            |                       | LOC100053123 | <-0.05 | 2.50681 |
| 15023353 | ENSECAT00000024594 | NIPAL3       | /// NIPA-like domain containing 3 // --- // 100071495                  | /// X                 | NIPAL3       | <-0.05 | 2.50653 |
| 15003376 | ENSECAT00000013896 | NUFIP1       | /// nuclear fragile X mental retardation protein interact              |                       | NUFIP1       | <-0.05 | 2.50538 |
| 15037475 | XM_001916721       | ITCH         | /// itchy E3 ubiquitin protein ligase // --- // 100069340              | /// ENSECA            | ITCH         | <-0.05 | 2.50496 |
| 15070936 | ENSECAT00000028405 | LOC100059167 | /// 39S ribosomal protein L1, mitochondrial-like // -                  |                       | LOC100059167 | <-0.05 | 2.50484 |
| 15031760 | XM_001502158       | LOC100055455 | /// 28S ribosomal protein S18a, mitochondrial-like // ---              |                       | LOC100055455 | <-0.05 | 2.50312 |
| 15122229 | ENSECAT00000009942 | LOC100064267 | /// receptor-binding cancer antigen expressed on SiSo                  |                       | LOC100064267 | <-0.05 | 2.50209 |
| 15062469 | XM_001498475       | DCLRE1C      | /// DNA cross-link repair 1C // --- // 100056337                       | /// ENSECAT00000      | DCLRE1C      | <-0.05 | 2.50127 |
| 15020371 | XM_001501357       | PET112       | /// PET112 homolog (yeast) // --- // 100062330                         | /// ENSECAT000000000  | PET112       | <-0.05 | 2.50111 |
| 15022499 | XM_001503634       | THRAP3       | /// thyroid hormone receptor associated protein 3 // --- // 10005      |                       | THRAP3       | <-0.05 | 2.50109 |
| 15109144 | ENSECAT00000020594 | ELAVL1       | /// ELAV (embryonic lethal, abnormal vision, Drosophila)-li            |                       | ELAVL1       | <-0.05 | 2.49955 |
| 15060860 |                    |              |                                                                        |                       |              | <-0.05 | 2.49906 |
| 15129695 | XM_001914705       | LOC100058718 | /// membrane-associated progesterone receptor component 1-I            |                       | LOC100058718 | <-0.05 | 2.49728 |

|          |                                                                                          |               |       |         |
|----------|------------------------------------------------------------------------------------------|---------------|-------|---------|
| 15056121 | ENSECAT00000015216 // LOC100062365 // glutathione reductase, mitochondrial-like // ---   | LOC100062365  | <0.05 | 2.4971  |
| 15082596 | ENSECAT00000016823 // LOC100071546 // uncharacterized LOC100071546 // --- // 100071546   | LOC100071546  | <0.05 | 2.49686 |
| 15007144 | XM_001916938 // UBR3 // ubiquitin protein ligase E3 component n-recogin 3 (putative) //  | UBR3          | <0.05 | 2.49651 |
| 14965825 | ENSECAT00000021406 // LOC100067814 // protein CASC3-like // --- // 100067814 // XM_001   | LOC100067814  | <0.05 | 2.4965  |
| 15121849 | ENSECAT00000011528 // MTDH // metaderin // --- // 100059885 // XM_001492316 // MTDH //   | MTDH          | <0.05 | 2.49571 |
| 15031248 | ENSECAT00000017692 // LOC100053260 // transcription initiation factor TFIIID subunit 11- | LOC100053260  | <0.05 | 2.49495 |
| 14979358 | XM_001496402 // LOC100065972 // BTB/POZ domain-containing adaptor for CUL3-mediated Rho  | LOC100065972  | <0.05 | 2.49313 |
| 15098273 | ENSECAT00000014580 // LOC100052084 // e3 ubiquitin-protein ligase Mdm2-like // --- // 1  | LOC100052084  | <0.05 | 2.49263 |
| 15085585 | ENSECAT00000014997 // LOC100065940 // succinate dehydrogenase cytochrome b560 subunit,   | LOC100065940  | <0.05 | 2.49204 |
| 15016333 | XM_001496034 // LOC100052421 // peroxiredoxin-1-like // --- // 100052421 // ENSECAT000   | LOC100052421  | <0.05 | 2.49076 |
| 15076754 | XM_001491503 // CBLL1 // Cbl proto-oncogene, E3 ubiquitin protein ligase-like 1 // ---   | CBLL1         | <0.05 | 2.48979 |
| 14995366 | XM_001498639 // UBA3 // ubiquitin-like modifier activating enzyme 3 // --- // 100053395  | UBA3          | <0.05 | 2.48817 |
| 14925503 | ---                                                                                      |               | <0.05 | 2.48801 |
| 14957087 | ENSECAT00000028978 // LOC100072399 // DNA polymerase zeta catalytic subunit-like // ---  | LOC100072399  | <0.05 | 2.488   |
| 14997562 | XM_001493003 // AZI2 // 5-azacytidine induced 2 // --- // 100051113 // ENSECAT00000021   | AZI2          | <0.05 | 2.4874  |
| 15010479 | ENSECAT00000012633 // SESTD1 // SEC14 and spectrin domains 1 // --- // 100067450 // XM   | SESTD1        | <0.05 | 2.48672 |
| 15025647 | ENSECAT00000017805 // ARHGAP10 // Rho GTPase activating protein 10 // --- // 100070647   | ARHGAP10      | <0.05 | 2.48615 |
| 15035671 | XM_001499068 // LOC100053208 // prostaglandin E2 receptor EP4 subtype-like // --- // 10  | LOC100053208  | <0.05 | 2.4849  |
| 14981305 | XM_003362894 // MAPK9 // mitogen-activated protein kinase 9 // --- // 100057961 // ENS   | MAPK9         | <0.05 | 2.4845  |
| 15100051 | XM_001496567 // LOC100052330 // inhibitor of growth protein 4-like // --- // 100052330   | LOC100052330  | <0.05 | 2.4845  |
| 15121047 | ---                                                                                      |               | <0.05 | 2.48363 |
| 15041634 | ENSECAT00000016395 // LOC100063011 // uncharacterized LOC100063011 // --- // 100063011   | LOC100063011  | <0.05 | 2.48345 |
| 15032879 | ENSECAT00000011373 // UPF1 // UPF1 regulator of nonsense transcripts homolog (yeast) //  | UPF1          | <0.05 | 2.48327 |
| 15090080 | ENSECAT00000023764 // SMYD2 // SET and MYND domain containing 2 // --- // 100052774 //   | SMYD2         | <0.05 | 2.48314 |
| 14940616 | ---                                                                                      |               | <0.05 | 2.48288 |
| 15042382 | XM_001499262 // NFX1 // nuclear transcription factor, X-box binding 1 // --- // 1000537  | NFX1          | <0.05 | 2.48273 |
| 15106807 | ENSECAT00000003443 // INTS4 // integrator complex subunit 4 // --- // ---                | INTS4         | <0.05 | 2.4822  |
| 15030027 | ENSECAT00000015105 // LOC100067631 // tyrosyl-DNA phosphodiesterase 2-like // --- // 10  | LOC100067631  | <0.05 | 2.4807  |
| 15135944 | ---                                                                                      |               | <0.05 | 2.47953 |
| 14965512 | XM_001491967 // LOC100065621 // transmembrane protein 106A-like // --- // 100065621 //   | LOC100065621  | <0.05 | 2.47868 |
| 14965653 | XM_001493847 // LOC100052586 // tubulin gamma-1 chain-like // --- // 100052586 // ENSE   | LOC100052586  | <0.05 | 2.4775  |
| 15049718 | XM_001501758 // ZBTB43 // zinc finger and BTB domain containing 43 // --- // 100067188   | ZBTB43        | <0.05 | 2.47708 |
| 14928133 | ---                                                                                      |               | <0.05 | 2.47705 |
| 14978031 | ENSECAT00000013878 // DAGLB // diacylglycerol lipase, beta // --- // 100061701 // XM_0   | DAGLB         | <0.05 | 2.47677 |
| 14987167 | XM_001504645 // ZFYVE16 // zinc finger, FYVE domain containing 16 // --- // 100065363 // | ZFYVE16       | <0.05 | 2.47649 |
| 15078229 | ENSECAT00000020747 // AVL9 // AVL9 homolog (S. cerevisiae) // --- // 100070105 // XM_    | AVL9          | <0.05 | 2.47645 |
| 15104949 | ENSECAT00000005112 // CBL // Cbl proto-oncogene, E3 ubiquitin protein ligase // --- //   | CBL           | <0.05 | 2.47557 |
| 15113604 | XM_001496455 // PRR14L // proline rich 14-like // --- // 100062987 // ENSECAT000000236   | PRR14L        | <0.05 | 2.47512 |
| 14929689 | ---                                                                                      |               | <0.05 | 2.47495 |
| 14937396 | ENSECAT00000020284 // LOC100053141 // UPF0464 protein C1orf44 homolog // --- // 100053   | LOC100053141  | <0.05 | 2.47462 |
| 14968442 | ENSECAT00000011216 // LOC100061712 // G protein pathway suppressor 2-like // --- // 100  | LOC100061712  | <0.05 | 2.47312 |
| 15072130 | ENSECAT00000008585 // PI4K2B // phosphatidylinositol 4-kinase type 2 beta // --- // ---  | PI4K2B        | <0.05 | 2.47059 |
| 14989934 | XM_001499916 // LOC100053736 // cytochrome c oxidase subunit 7A-related protein, mitoch  | LOC100053736  | <0.05 | 2.47018 |
| 14985679 | ---                                                                                      |               | <0.05 | 2.46999 |
| 15096112 | XM_001497473 // LOC100067410 // serine-threonine kinase receptor-associated protein-lik  | LOC100067410  | <0.05 | 2.46993 |
| 15004936 | XM_001487974 // ALG11 // asparagine-linked glycosylation 11, alpha-1,2-mannosyltransfer  | ALG11         | <0.05 | 2.46987 |
| 15067265 | DQ988040 // CLOCK // clock homolog (mouse) // --- // 100034166                           | CLOCK         | <0.05 | 2.46931 |
| 15081633 | XM_003364859 // LOC1000629458 // NADH dehydrogenase [ubiquinone] 1 alpha subcomplex subu | LOC1000629458 | <0.05 | 2.46768 |
| 14993407 | XM_003363001 // EML4 // echinoderm microtubule associated protein like 4 // --- // 1000  | EML4          | <0.05 | 2.46717 |
| 14927901 | ---                                                                                      |               | <0.05 | 2.46631 |
| 15094491 | ENSECAT00000023767 // SP140 // SP140 nuclear body protein // --- // ---                  | SP140         | <0.05 | 2.46585 |
| 14956463 | XM_001503749 // RNGTT // RNA guanylyltransferase and 5'-phosphatase // --- // 100065700  | RNGTT         | <0.05 | 2.46456 |
| 15043894 | ENSECAT00000012966 // LOC100068209 // beta-1,4-galactosyltransferase 1-like // --- // 1  | LOC100068209  | <0.05 | 2.46399 |
| 14929351 | ---                                                                                      |               | <0.05 | 2.46366 |
| 14927113 | ---                                                                                      |               | <0.05 | 2.46337 |
| 14925657 | ---                                                                                      |               | <0.05 | 2.46288 |
| 15011908 | ENSECAT00000020156 // LOC100058922 // translation initiation factor eIF-2B subunit epsi  | LOC100058922  | <0.05 | 2.46214 |
| 15035258 | XM_001493976 // KIF2A // kinesin heavy chain member 2A // --- // 100050982 // ENSECAT0   | KIF2A         | <0.05 | 2.46195 |
| 15087064 | ENSECAT00000002893 // LOC100065233 // peroxisomal membrane protein 11B-like // --- // 1  | LOC100065233  | <0.05 | 2.46181 |
| 14988632 | XM_001497977 // RNF103 // ring finger protein 103 // --- // 100052907 // ENSECAT0000000  | RNF103        | <0.05 | 2.46138 |
| 14954951 | XM_001488542 // LOC100050944 // ER lumen protein retaining receptor 1-like // --- // 10  | LOC100050944  | <0.05 | 2.46084 |
| 15057003 | ENSECAT00000010688 // BAG4 // BCL2-associated athanogene 4 // --- // 100057730 // XM_0   | BAG4          | <0.05 | 2.46059 |
| 14933286 | ENSECAT00000021996 // LOC100070070 // UPF0668 protein C1orf76-like // --- // 100070070   | LOC100070070  | <0.05 | 2.46022 |
| 15126678 | ---                                                                                      |               | <0.05 | 2.45963 |
| 14962593 | ENSECAT00000010791 // LOC100072797 // putative ATP-dependent RNA helicase DHX33-like //  | LOC100072797  | <0.05 | 2.45938 |
| 15073960 | XM_003364550 // LOC100630213 // protein FAM36A-like // --- // 100630213 // ENSECAT0000   | LOC100630213  | <0.05 | 2.45903 |
| 14977169 | ENSECAT000000026215 // ADCY9 // adenylyl cyclase 9 // --- // 100066046 // XM_001502248   | ADCY9         | <0.05 | 2.45836 |
| 14999577 | XM_001489012 // LOC100050505 // BTB/POZ domain-containing protein KCTD6-like // --- //   | LOC100050505  | <0.05 | 2.4575  |
| 14932969 | ENSECAT00000014008 // ZDHHC6 // zinc finger, DHHC-type containing 6 // --- // ---        | ZDHHC6        | <0.05 | 2.45623 |
| 14995904 | XM_001492187 // RFT1 // RFT1 homolog (S. cerevisiae) // --- // 100059676 // ENSECAT000   | RFT1          | <0.05 | 2.45599 |
| 15045459 | XM_001493748 // AHSA1 // AHSA1, activator of heat shock 90kDa protein ATPase homolog 1 ( | AHSA1         | <0.05 | 2.45377 |
| 14943290 | XM_001502747 // LOC100072720 // inorganic pyrophosphatase-like // --- // 100072720 //    | LOC100072720  | <0.05 | 2.45306 |
| 15068840 | XM_001490279 // LOC100050524 // golgin subfamily A member 7-like // --- // 100050524 //  | LOC100050524  | <0.05 | 2.45279 |
| 14957654 | XM_003362372 // LOC100073151 // serine/threonine-protein kinase Sgk1-like // --- // 100  | LOC100073151  | <0.05 | 2.45258 |
| 15061257 | ENSECAT00000012509 // LOC100070677 // PPPDE peptidase domain-containing protein 2-like   | LOC100070677  | <0.05 | 2.45228 |
| 15099226 | XM_001495779 // USP40 // ubiquitin specific peptidase 40 // --- // 100065074 // ENSECA   | USP40         | <0.05 | 2.45072 |
| 15133639 | NR_033102 // MIR505 // microRNA mir-505 // --- // 100315095                              | MIR505        | <0.05 | 2.45019 |
| 15026054 | ENSECAT00000020736 // LOC100063889 // uncharacterized protein KIAA1109-like // --- // 1  | LOC100063889  | <0.05 | 2.44996 |
| 14944547 | XM_001496540 // LOC100066171 // UPF0765 protein C1orf58-like // --- // 100066171 // E    | LOC100066171  | <0.05 | 2.44987 |
| 15078776 | ENSECAT00000010372 // IRF5 // interferon regulatory factor 5 // --- // 100071786 // XM   | IRF5          | <0.05 | 2.44941 |
| 15117585 | XM_003365448 // DRG1 // developmentally regulated GTP binding protein 1 // --- // 10005  | DRG1          | <0.05 | 2.44896 |
| 14979627 | XM_001501020 // LOC100068373 // dynactin subunit 5-like // --- // 100068373 // ENSECAT   | LOC100068373  | <0.05 | 2.44861 |
| 14936941 | XM_001493806 // LOC100062111 // secretory carrier-associated membrane protein 2-like //  | LOC100062111  | <0.05 | 2.44827 |
| 15001139 | ENSECAT00000002299 // LOC100053940 // myeloid differentiation primary response protein   | LOC100053940  | <0.05 | 2.44737 |
| 14934326 | ENSECAT00000014702 // SIRT1 // sirtuin 1 // --- // 100072571 // XM_001502550 // SIRT1    | SIRT1         | <0.05 | 2.44712 |
| 14961325 | XM_001503426 // LOC100070859 // dynein light chain 2, cytoplasmic-like // --- // 100070  | LOC100070859  | <0.05 | 2.447   |
| 15129726 | ENSECAT00000007209 // ZBTB33 // zinc finger and BTB domain containing 33 // --- // 1000  | ZBTB33        | <0.05 | 2.44559 |
| 14929591 | ---                                                                                      |               | <0.05 | 2.44543 |
| 15036485 | ENSECAT00000023884 // LOC100050228 // crooked neck-like protein 1-like // --- // 100050  | LOC100050228  | <0.05 | 2.44488 |
| 15024898 | ENSECAT00000012264 // LOC100059300 // BTB/POZ domain-containing protein KCTD9-like // -  | LOC100059300  | <0.05 | 2.44483 |
| 15026806 | ENSECAT00000008100 // LOC100063959 // transmembrane protein 170B-like // --- // 1000639  | LOC100063959  | <0.05 | 2.44225 |
| 15053877 | XM_001498235 // IFNAR2 // interferon (alpha, beta and omega) receptor 2 // --- // 10005  | IFNAR2        | <0.05 | 2.44186 |
| 15097539 | XM_003365259 // LOC100051662 // diacylglycerol kinase alpha-like // --- // 100051662 //  | LOC100051662  | <0.05 | 2.44173 |
| 15109442 | ENSECAT00000026255 // CASP1 // caspase 1, apoptosis-related cysteine peptidase // --- // | CASP1         | <0.05 | 2.44171 |
| 15025876 | ENSECAT00000025577 // LOC100063562 // UPF0462 protein C4orf33-like // --- // 100063562   | LOC100063562  | <0.05 | 2.44003 |
| 15001668 | ENSECAT00000017594 // MRPL3 // mitochondrial ribosomal protein L3 // --- // 100052750 // | MRPL3         | <0.05 | 2.43918 |
| 15000886 | ENSECAT00000015724 // TRAK1 // trafficking protein, kinesin binding 1 // --- // 1000676  | TRAK1         | <0.05 | 2.43711 |
| 15007296 | XM_001494902 // LOC100063802 // histone acetyltransferase type B catalytic subunit-like  | LOC100063802  | <0.05 | 2.43658 |
| 15014349 | XM_001499782 // BCL6 // B-cell CLL/lymphoma 6 // --- // 100059642 // ENSECAT0000000568   | BCL6          | <0.05 | 2.43638 |
| 14930133 | ---                                                                                      |               | <0.05 | 2.43629 |
| 15020785 | ENSECAT00000026349 // PGRMC2 // progesterone receptor membrane component 2 // --- // --  | PGRMC2        | <0.05 | 2.43591 |
| 14936714 | ENSECAT00000018244 // IREB2 // iron-responsive element binding protein 2 // --- // 1000  | IREB2         | <0.05 | 2.43545 |
| 15047234 | ---                                                                                      |               | <0.05 | 2.43499 |
| 14987651 | XM_001504043 // GTF2H2 // general transcription factor IIH, polypeptide 2, 44kDa // ---  | GTF2H2        | <0.05 | 2.43305 |
| 15012935 | XM_001502372 // LOC100060962 // rab-like protein 3-like // --- // 100060962 // ENSECAT   | LOC100060962  | <0.05 | 2.43259 |
| 15007540 | XM_001917545 // LOC100067359 // pleckstrin homology domain-containing family A member 3  | LOC100067359  | <0.05 | 2.43224 |

|          |                    |                                                                         |                       |              |        |         |
|----------|--------------------|-------------------------------------------------------------------------|-----------------------|--------------|--------|---------|
| 14928395 | ---                |                                                                         |                       |              | <-0.05 | 2.4317  |
| 14928483 | ---                |                                                                         |                       |              | <-0.05 | 2.4317  |
| 15091575 | XM_001491319       | PRUNE // prune homolog (Drosophila) // --- // 100055127                 | ENSCAT0000            | PRUNE        | <-0.05 | 2.43161 |
| 14945585 | XM_001487863       | LOC100049875 // AN1-type zinc finger protein 6-like // --- // 100049875 |                       | LOC100049875 | <-0.05 | 2.43097 |
| 14952991 | XM_001504161       | LOC100067138 // nogo-B receptor-like // --- // 100067138                | ENSCAT000             | LOC100067138 | <-0.05 | 2.43086 |
| 15052994 | XM_001498768       | LOC100069513 // mediator of RNA polymerase II transcription subunit 27- |                       | LOC100069513 | <-0.05 | 2.43008 |
| 15090760 | ---                |                                                                         |                       |              | <-0.05 | 2.43077 |
| 15071764 | XM_001496906       | LOC100054802 // transmembrane protein 33-like // --- // 100054802       | /// E                 | LOC100054802 | <-0.05 | 2.43029 |
| 15000469 | XM_001498598       | ARIH2 // ariadne homolog 2 (Drosophila) // --- // 100053691             | /// ENSCAT            | ARIH2        | <-0.05 | 2.43017 |
| 15127085 | XM_001490045       | ZRSR2 // zinc finger (CCH type), RNA-binding motif and serine/arginine  |                       | ZRSR2        | <-0.05 | 2.42996 |
| 15044098 | ENSCAT00000017002  | SECISBP2 // SECIS binding protein 2 // --- // ---                       |                       | SECISBP2     | <-0.05 | 2.42984 |
| 15133068 | XM_001914996       | LOC100058559 // regulator of nonsense transcripts 3B-like // --- // 100 |                       | LOC100058559 | <-0.05 | 2.42979 |
| 14959726 | XM_001495314       | LOC100064401 // coiled-coil domain-containing protein 43-like // --- // |                       | LOC100064401 | <-0.05 | 2.42975 |
| 15062601 | XM_001916725       | KIN // KIN, antigenic determinant of recA protein homolog (mouse) // -- |                       | KIN          | <-0.05 | 2.42941 |
| 15095342 | ENSCAT00000026686  | FBXL14 // F-box and leucine-rich repeat protein 14 // --- // ---        |                       | FBXL14       | <-0.05 | 2.42922 |
| 15016514 | XM_001498548       | LOC100053305 // elongation of very long chain fatty acids protein 1-lik |                       | LOC100053305 | <-0.05 | 2.42875 |
| 15062525 | NM_001190419       | SEPHS1 // selenophosphate synthetase 1 // --- // 100056604              | /// ENSCAT0           | SEPHS1       | <-0.05 | 2.42865 |
| 15121697 | ENSCAT00000007598  | LOC100051849 // protein FAM92A1-like // --- // 100051849                | /// XM_0              | LOC100051849 | <-0.05 | 2.42596 |
| 14928673 | ---                |                                                                         |                       |              | <-0.05 | 2.42553 |
| 15097636 | ENSCAT00000014392  | ESYT1 // extended synaptotagmin-like protein 1 // --- // 10005197       |                       | ESYT1        | <-0.05 | 2.42484 |
| 14985672 | ---                |                                                                         |                       |              | <-0.05 | 2.42467 |
| 15011264 | XM_001505112       | LOC100067464 // ribosome biogenesis protein WDR12-like // --- // 100067 |                       | LOC100067464 | <-0.05 | 2.42456 |
| 14984053 | XM_001504661       | WDR41 // WD repeat domain 41 // --- // 100065484                        | /// ENSCAT00000009889 | WDR41        | <-0.05 | 2.42422 |
| 15044375 | ENSCAT00000019007  | MUDENG // adaptor-related protein complex 5, mu 1 subunit // ---        |                       | MUDENG       | <-0.05 | 2.42411 |
| 15132251 | XM_001502685       | LOC100072678 // transcriptional regulator ATRX-like // --- // 100072678 |                       | LOC100072678 | <-0.05 | 2.42305 |
| 14993934 | XM_001502144       | LOC100055055 // GPN-loop GTPase 1-like // --- // 100055055              | /// ENSCAT0           | LOC100055055 | <-0.05 | 2.42225 |
| 14960117 | XM_001494956       | LOC100053004 // ras-related protein Rab-5C-like // --- // 100053004     | ///                   | LOC100053004 | <-0.05 | 2.42155 |
| 15116337 | XM_001497768       | PIK3C3 // phosphoinositide-3-kinase, class 3 // --- // 100053039        | /// EN                | PIK3C3       | <-0.05 | 2.42131 |
| 15026664 | XM_001490025       | RREB1 // ras responsive element binding protein 1 // --- // 100050903   | ///                   | RREB1        | <-0.05 | 2.42084 |
| 15017401 | ---                |                                                                         |                       |              | <-0.05 | 2.42049 |
| 14930125 | ---                |                                                                         |                       |              | <-0.05 | 2.41978 |
| 15110764 | ENSCAT00000026537  | LOC100146594 // UV excision repair protein RAD23 homolog A-like /       |                       | LOC100146594 | <-0.05 | 2.41896 |
| 15041646 | ENSCAT00000014654  | LOC100064023 // UPF0586 protein C9orf41 homolog // --- // 1000640       |                       | LOC100064023 | <-0.05 | 2.41863 |
| 15039937 | XM_001501271       | PIGU // phosphatidylinositol glycan anchor biosynthesis, class U // --- |                       | PIGU         | <-0.05 | 2.41849 |
| 15055592 | XM_003364189       | LOC100630015 // uncharacterized LOC100630015 // --- // 100630015        | /// EN                | LOC100630015 | <-0.05 | 2.41788 |
| 15008186 | XM_001497246       | NOP58 // NOP58 ribonucleoprotein homolog (yeast) // --- // 100067129    | ///                   | NOP58        | <-0.05 | 2.41755 |
| 15120138 | ENSCAT00000004441  | PIAS2 // protein inhibitor of activated STAT, 2 // --- // 1000688       |                       | PIAS2        | <-0.05 | 2.41717 |
| 15068545 | XM_001490225       | VPS35 // vacuolar protein sorting 35 homolog (S. cerevisiae) // --- //  |                       | VPS35        | <-0.05 | 2.41695 |
| 15019492 | XM_001490720       | LOC100057357 // serine/threonine-protein phosphatase 2B catalytic subun |                       | LOC100057357 | <-0.05 | 2.41681 |
| 14948273 | XM_001490602       | LOC100051729 // proteasome activator complex subunit 2-like // --- // 1 |                       | LOC100051729 | <-0.05 | 2.41607 |
| 14945741 | XM_001493197       | LOC100061150 // tetraspanin-3-like // --- // 100061150                  | /// ENSCAT00000       | LOC100061150 | <-0.05 | 2.41577 |
| 14937555 | ENSCAT00000010583  | FAM96A // family with sequence similarity 96, member A // --- //        |                       | FAM96A       | <-0.05 | 2.41552 |
| 15041007 | XM_003363950       | LOC100630568 // ATP synthase subunit epsilon, mitochondrial-like // --- |                       | LOC100630568 | <-0.05 | 2.41492 |
| 14930009 | ---                |                                                                         |                       |              | <-0.05 | 2.41446 |
| 14962228 | ENSCAT00000026314  | LOC100059869 // glyoxalase domain-containing protein 4-like // --       |                       | LOC100059869 | <-0.05 | 2.41388 |
| 15134732 | ---                |                                                                         |                       |              | <-0.05 | 2.41359 |
| 14961836 | XM_001504001       | LOC100058439 // protein Njmu-R1-like // --- // 100058439                | /// ENSCAT000         | LOC100058439 | <-0.05 | 2.41346 |
| 15047852 | XM_001494497       | LOC100063171 // serine/threonine-protein phosphatase 4 regulatory subun |                       | LOC100063171 | <-0.05 | 2.41272 |
| 15116915 | NM_001256934       | SOC5 // suppressor of cytokine signaling 6 // --- // 100052089          | /// ENS               | SOC5         | <-0.05 | 2.41177 |
| 15057511 | XM_001491998       | LOC100051135 // UPF0636 protein C4orf41-like // --- // 100051135        | /// EN                | LOC100051135 | <-0.05 | 2.41169 |
| 14949289 | XM_001490648       | UBA2 // ubiquitin-like modifier activating enzyme 2 // --- // 100057234 |                       | UBA2         | <-0.05 | 2.40919 |
| 14951148 | ENSCAT00000003823  | LOC100147583 // IgG receptor FcRn large subunit p51-like // --- /       |                       | LOC100147583 | <-0.05 | 2.40893 |
| 15109487 | ENSCAT00000020755  | LOC100061658 // alkylated DNA repair protein alkB homolog 8-like        |                       | LOC100061658 | <-0.05 | 2.40892 |
| 14950330 | ---                |                                                                         |                       |              | <-0.05 | 2.40849 |
| 15006164 | XM_001504928       | LOC100068341 // pleckstrin homology domain-containing family B member 2 |                       | LOC100068341 | <-0.05 | 2.40837 |
| 14977584 | ENSCAT00000025328  | LOC100067691 // H(+)/Cl(-) exchange transporter 7-like // --- //        |                       | LOC100067691 | <-0.05 | 2.40837 |
| 15030623 | ---                |                                                                         |                       |              | <-0.05 | 2.40883 |
| 14926851 | ---                |                                                                         |                       |              | <-0.05 | 2.40779 |
| 14934895 | ENSCAT00000006180  | SAMD8 // sterile alpha motif domain containing 8 // --- // 100072       |                       | SAMD8        | <-0.05 | 2.40774 |
| 15056454 | ENSCAT00000007884  | IRF2 // interferon regulatory factor 2 // --- // 100050990              | /// XM                | IRF2         | <-0.05 | 2.40737 |
| 15093066 | XM_003365100       | SH3GLB1 // SH3-domain GRB2-like endophilin B1 // --- // 100052441       | /// X                 | SH3GLB1      | <-0.05 | 2.40727 |
| 15077776 | XM_001496547       | AHR // aryl hydrocarbon receptor // --- // 100066186                    | /// ENSCAT000000001   | AHR          | <-0.05 | 2.40705 |
| 15049158 | XM_001490903       | UGCG // UDP-glucose ceramide glucosyltransferase // --- // 100057611    | ///                   | UGCG         | <-0.05 | 2.40675 |
| 15037717 | ENSCAT00000011343  | LOC100147598 // uncharacterized protein C2orf24 homolog // --- /        |                       | LOC100147598 | <-0.05 | 2.40629 |
| 14998631 | XM_001488228       | LOC100051936 // GMP synthase [glutamine-hydrolyzing]-like // --- // 100 |                       | LOC100051936 | <-0.05 | 2.40615 |
| 14944044 | XM_003363690       | SCFD1 // sec1 family domain containing 1 // --- // 100050005            | /// ENSECA            | SCFD1        | <-0.05 | 2.40602 |
| 15126716 | ---                |                                                                         |                       |              | <-0.05 | 2.40529 |
| 14989018 | XM_001491302       | LOC100058270 // RNA/RNP complex-1-interacting phosphatase-like // --- / |                       | LOC100058270 | <-0.05 | 2.40418 |
| 15111351 | XM_001917013       | LOC100146180 // ras-related protein Rab-11B-like // --- // 100146180    | ///                   | LOC100146180 | <-0.05 | 2.40364 |
| 15072753 | ENSCAT00000011849  | TACC3 // transforming, acidic coiled-coil containing protein 3 //       |                       | TACC3        | <-0.05 | 2.40331 |
| 15069438 | ENSCAT00000026430  | LOC100067122 // telomeric repeat-binding factor 2-like // --- //        |                       | LOC100067122 | <-0.05 | 2.40291 |
| 15073290 | XM_001488053       | IARS2 // isoleucyl-tRNA synthetase 2, mitochondrial // --- // 100049915 |                       | IARS2        | <-0.05 | 2.40251 |
| 15029811 | XM_001916775       | RANBP9 // RAN binding protein 9 // --- // 100065036                     | /// ENSCAT000000004   | RANBP9       | <-0.05 | 2.40213 |
| 15013000 | ---                |                                                                         |                       |              | <-0.05 | 2.40146 |
| 14948903 | ENSCAT00000018933  | NEMF // nuclear export mediator factor // --- // 100065895              |                       | NEMF         | <-0.05 | 2.40096 |
| 15104363 | ENSCAT000000000381 | ZC3H12C // zinc finger CCH-type containing 12C // --- // 1000700        |                       | ZC3H12C      | <-0.05 | 2.39887 |
| 15002651 | ---                |                                                                         |                       |              | <-0.05 | 2.39835 |
| 14928711 | ---                |                                                                         |                       |              | <-0.05 | 2.39655 |
| 15000852 | ENSCAT00000021804  | NKTR // natural killer-tumor recognition sequence // --- // 10006       |                       | NKTR         | <-0.05 | 2.39648 |
| 15003247 | XM_001489540       | RCBTB2 // regulator of chromosome condensation (RCC1) and BTB (POZ) dom |                       | RCBTB2       | <-0.05 | 2.39616 |
| 14965996 | ---                |                                                                         |                       |              | <-0.05 | 2.39572 |
| 14978355 | ENSCAT00000026545  | ZNF3 // zinc finger protein 3 // --- // 100067274                       | /// XM_00191552       | ZNF3         | <-0.05 | 2.39523 |
| 15004412 | ENSCAT00000010216  | LATS2 // LATS, large tumor suppressor, homolog 2 (Drosophila) //        |                       | LATS2        | <-0.05 | 2.39377 |
| 14929353 | ---                |                                                                         |                       |              | <-0.05 | 2.39327 |
| 15017183 | ENSCAT00000025632  | LOC100055706 // adenylate kinase 2, mitochondrial-like // --- //        |                       | LOC100055706 | <-0.05 | 2.39323 |
| 15014621 | ENSCAT00000011003  | LOC100070138 // run domain Beclin-1 interacting and cysteine-rich       |                       | LOC100070138 | <-0.05 | 2.39227 |
| 15130232 | ENSCAT00000016970  | MTM1 // myotubularin 1 // --- // 100069680                              | /// XM_001505085      | MTM1         | <-0.05 | 2.39019 |
| 14965709 | XM_001494738       | STAT5A // signal transducer and activator of transcription 5A // --- // |                       | STAT5A       | <-0.05 | 2.39012 |
| 15058712 | XM_001498677       | LOC100068154 // WASH complex subunit 7-like // --- // 100068154         | /// ENS               | LOC100068154 | <-0.05 | 2.38967 |
| 14956456 | XM_001500351       | LOC100070681 // akirin-2-like // --- // 100070681                       | /// ENSCAT0000001108  | LOC100070681 | <-0.05 | 2.38944 |
| 15086128 | XM_001495102       | LOC100064105 // lysosomal protein NCU-G1-like // --- // 100064105       | /// E                 | LOC100064105 | <-0.05 | 2.388   |
| 14960947 | XM_001502506       | MYST2 // K(lysine) acetyltransferase 7 // --- // 100056161              | /// ENSCAT0           | MYST2        | <-0.05 | 2.38793 |
| 14989998 | XM_001500324       | SOS1 // son of sevenless homolog 1 (Drosophila) // --- // 100053889     | ///                   | SOS1         | <-0.05 | 2.38774 |
| 15000554 | ENSCAT00000026507  | LOC100064728 // kelch-like protein 18-like // --- // 100064728          | ///                   | LOC100064728 | <-0.05 | 2.38689 |
| 15076604 | XM_001914803       | PSMC2 // proteasome (prosome, macropain) 26S subunit, ATPase, 2 // ---  |                       | PSMC2        | <-0.05 | 2.38598 |
| 14946959 | XM_003363514       | LOC100630319 // e3 ubiquitin ligase RNF4-like // --- // 100630319       | /// E                 | LOC100630319 | <-0.05 | 2.38491 |
| 15122420 | XM_001497901       | LOC100057539 // protein FAM91A1-like // --- // 100057539                | /// ENSCAT000         | LOC100057539 | <-0.05 | 2.38373 |
| 15062562 | XM_001916601       | UPF2 // UPF2 regulator of nonsense transcripts homolog (yeast) // --- / |                       | UPF2         | <-0.05 | 2.38327 |
| 14982492 | ENSCAT00000024748  | LOC100061298 // glucosamine-6-phosphate isomerase 1-like // --- /       |                       | LOC100061298 | <-0.05 | 2.38223 |
| 15067570 | ENSCAT00000016939  | LOC100062333 // glucosamine-6-phosphate isomerase 2-like // --- /       |                       | LOC100062333 | <-0.05 | 2.38218 |
| 15121810 | ENSCAT00000004552  | LOC100055388 // pleckstrin homology domain-containing family F me       |                       | LOC100055388 | <-0.05 | 2.38215 |
| 14957380 | XM_001504205       | SERINC1 // serine incorporator 1 // --- // 100067255                    | /// ENSCAT0000001     | SERINC1      | <-0.05 | 2.38206 |
| 14929671 | ---                |                                                                         |                       |              | <-0.05 | 2.38125 |
| 14934473 | ---                |                                                                         |                       |              | <-0.05 | 2.38099 |
| 15047168 | XM_001487916       | LOC100054092 // mediator of RNA polymerase II transcription subunit 6-I |                       | LOC100054092 | <-0.05 | 2.38077 |
| 15055179 | XM_001497986       | LOC100052430 // transmembrane protein 50B-like // --- // 100052430      | ///                   | LOC100052430 | <-0.05 | 2.3806  |



|          |                                                                                            |              |       |         |
|----------|--------------------------------------------------------------------------------------------|--------------|-------|---------|
| 14982730 | ENSECAT0000020878 // SIL1 // SIL1 homolog, endoplasmic reticulum chaperone (S. cerevisia)  | SIL1         | <0.05 | 2.38002 |
| 15069783 |                                                                                            |              | <0.05 | 2.37977 |
| 15091003 | XM_001500143 // LOC100064158 // ammonium transporter Rh type B-like // --- // 100064158    | LOC100064158 | <0.05 | 2.37975 |
| 15043365 |                                                                                            |              | <0.05 | 2.37974 |
| 15036202 | XM_003363841 // LOC100071527 // uncharacterized protein KIAA0947-like // --- // 1000715    | LOC100071527 | <0.05 | 2.37908 |
| 1497731  | XM_001915361 // LOC100147047 // jmjC domain-containing protein 8-like // --- // 1001470    | LOC100147047 | <0.05 | 2.37841 |
| 15078059 | ENSECAT00000004275 // TAX1BP1 // Tax1 (human T-cell leukemia virus type I) binding prot    | TAX1BP1      | <0.05 | 2.37821 |
| 15123517 | ENSECAT00000016077 // SDCBP // syndecan binding protein (syntenin) // --- // 100052836     | SDCBP        | <0.05 | 2.37808 |
| 14990415 | XM_001502269 // LOC100055191 // protein phosphatase 1G-like // --- // 100055191 // ENS     | LOC100055191 | <0.05 | 2.37776 |
| 15021423 | ENSECAT00000006894 // LOC100060596 // transcription elongation factor A N-terminal and     | LOC100060596 | <0.05 | 2.37771 |
| 14982649 | XM_001502340 // LOC100072416 // steroid receptor RNA activator 1-like // --- // 1000724    | LOC100072416 | <0.05 | 2.37759 |
| 14998084 | ENSECAT00000016410 // CDV3 // CDV3 homolog (mouse) // --- // ---                           | CDV3         | <0.05 | 2.37756 |
| 15089252 | ENSECAT00000009946 // YOD1 // YOD1 OTU deubiquinating enzyme 1 homolog (S. cerevisiae)     | YOD1         | <0.05 | 2.37709 |
| 14963647 | XM_001488126 // LOC100051522 // serine hydroxymethyltransferase, cytosolic-like // ---     | LOC100051522 | <0.05 | 2.37659 |
| 15112685 | ENSECAT00000008111 // LOC100071307 // RING finger protein 141-like // --- // 100071307     | LOC100071307 | <0.05 | 2.37568 |
| 14974710 | ENSECAT00000012149 // C7orf26 // chromosome 7 open reading frame 26 // --- // ---          | C7orf26      | <0.05 | 2.37485 |
| 15019185 | XM_003364468 // LOC100629488 // uncharacterized LOC100629488 // --- // 100629488 // EN     | LOC100629488 | <0.05 | 2.37478 |
| 15094507 |                                                                                            |              | <0.05 | 2.37407 |
| 14976364 | ENSECAT000000021755 // GGA2 // golgi-associated, gamma adaptin ear containing, ARF bindi   | GGA2         | <0.05 | 2.37396 |
| 15040177 | ENSECAT00000017782 // LOC100069714 // protein NDRG3-like // --- // 100069714               | LOC100069714 | <0.05 | 2.37373 |
| 15044990 | ENSECAT000000021762 // LOC100053161 // zinc transporter ZIP9-like // --- // 100053161 //   | LOC100053161 | <0.05 | 2.37368 |
| 15086428 | ENSECAT00000002639 // ADAR // adenosine deaminase, RNA-specific // --- // ---              | ADAR         | <0.05 | 2.37352 |
| 15063976 | XM_001915288 // LOC100059123 // nucleotide-binding oligomerization domain-containing pr    | LOC100059123 | <0.05 | 2.37324 |
| 15045207 | XM_001490028 // ZNF410 // zinc finger protein 410 // --- // 100050679 // ENSECAT000000     | ZNF410       | <0.05 | 2.37302 |
| 14935396 | XM_001916677 // LOC100060551 // egl nine homolog 1-like // --- // 100060551 // ENSECAT     | LOC100060551 | <0.05 | 2.37289 |
| 14998166 | XM_001496380 // PCCB // propionyl CoA carboxylase, beta polypeptide // --- // 100065950    | PCCB         | <0.05 | 2.37289 |
| 15025032 | XM_001493351 // INTS9 // integrator complex subunit 9 // --- // 100061398 // XM_003364     | INTS9        | <0.05 | 2.37248 |
| 14935485 | ENSECAT000000023662 // LOC100051461 // poly(ADP-ribose) glycohydrolase-like // --- // 10   | LOC100051461 | <0.05 | 2.37217 |
| 15005451 | ENSECAT00000013234 // LOC100053014 // probable E3 ubiquitin-protein ligase MYCBP2-like     | LOC100053014 | <0.05 | 2.37171 |
| 15017042 | XM_001499327 // LOC100069588 // splicing factor, proline- and glutamine-rich-like // ---   | LOC100069588 | <0.05 | 2.37129 |
| 15098084 | XM_001916898 // TMEM5 // transmembrane protein 5 // --- // 100056566 // ENSECAT00000001    | TMEM5        | <0.05 | 2.37116 |
| 15102008 | ENSECAT00000009299 // BIN2 // bridging integrator 2 // --- // 100060850 // XM_00149298     | BIN2         | <0.05 | 2.37113 |
| 15115169 | ENSECAT00000005660 // LOC100059210 // zinc finger protein 664-like // --- // 100059210     | LOC100059210 | <0.05 | 2.37033 |
| 15114744 | ENSECAT00000005674 // LOC100058336 // actin-related protein 2/3 complex subunit 3-like     | LOC100058336 | <0.05 | 2.36899 |
| 15121035 | XM_001493139 // LOC100051585 // translocating chain-associated membrane protein 1-like     | LOC100051585 | <0.05 | 2.36869 |
| 15055715 | ENSECAT00000002632 // LOC100049837 // arylamine N-acetyltransferase 1-like // --- // 10    | LOC100049837 | <0.05 | 2.36862 |
| 15040763 | ENSECAT00000012363 // UBE2V1 // ubiquitin-conjugating enzyme E2 variant 1 // --- // ---    | UBE2V1       | <0.05 | 2.3685  |
| 14969518 | XM_001488265 // API5 // apoptosis inhibitor 5 // --- // 100050009 // ENSECAT00000002421    | API5         | <0.05 | 2.36674 |
| 15021494 | ENSECAT00000011700 // ZYG11B // zyg-11 homolog B (C. elegans) // --- // 100061587 // X     | ZYG11B       | <0.05 | 2.36664 |
| 15096449 | XM_001499230 // FAR2 // fatty acyl CoA reductase 2 // --- // 100069466 // ENSECAT00000     | FAR2         | <0.05 | 2.36633 |
| 15106554 | XM_001491833 // SLC36A4 // solute carrier family 36 (proton/amino acid symporter), memb    | SLC36A4      | <0.05 | 2.36631 |
| 14932035 |                                                                                            |              | <0.05 | 2.366   |
| 15080408 | ENSECAT00000010067 // LOC100059468 // synaptophysin-like protein 1-like // --- // 10005    | LOC100059468 | <0.05 | 2.36575 |
| 14964662 | XM_001492450 // LOC100060086 // BTB/POZ domain-containing protein KCTD2-like // --- //     | LOC100060086 | <0.05 | 2.36486 |
| 14998265 | XM_001495342 // LOC100064018 // 28S ribosomal protein S22, mitochondrial-like // --- //    | LOC100064018 | <0.05 | 2.36408 |
| 15120852 | ENSECAT000000024737 // LOC100050326 // inositol monophosphatase 1-like // --- // 1000503   | LOC100050326 | <0.05 | 2.36276 |
| 14943835 | XM_001490352 // CSGALNACT2 // chondroitin sulfate N-acetylgalactosaminyltransferase 2 /    | CSGALNACT2   | <0.05 | 2.36273 |
| 14983519 | XM_001918313 // FBXL17 // F-box and leucine-rich repeat protein 17 // --- // 100146140     | FBXL17       | <0.05 | 2.36247 |
| 15061235 | XM_001502489 // LOC100055713 // protein Tob2-like // --- // 100055713 // ENSECAT000000     | LOC100055713 | <0.05 | 2.36237 |
| 15031178 | ENSECAT000000025691 // LOC100061755 // putative Bcl-2 homologous antagonist/killer 2-like  | LOC100061755 | <0.05 | 2.36203 |
| 15042401 | XM_001498260 // LOC100068420 // ubiquitin-conjugating enzyme E2 R2-like // --- // 10006    | LOC100068420 | <0.05 | 2.36188 |
| 15018974 | XM_001497360 // CEP104 // centrosomal protein 104kDa // --- // 100052540 // ENSECAT000     | CEP104       | <0.05 | 2.36147 |
| 15043564 | ENSECAT00000015124 // LOC100062221 // probable palmitoyltransferase ZDHHC21-like // ---    | LOC100062221 | <0.05 | 2.36144 |
| 15064973 | XM_001497165 // LOC100067034 // vacuolar protein sorting-associated protein 4A-like //     | LOC100067034 | <0.05 | 2.36128 |
| 14960598 | ENSECAT00000009851 // MED1 // mediator complex subunit 1 // --- // 100054967               | MED1         | <0.05 | 2.36122 |
| 14947295 | ENSECAT000000022504 // RTF1 // Rtf1, Paf1/RNA polymerase II complex component, homolog (   | RTF1         | <0.05 | 2.36063 |
| 15136294 |                                                                                            |              | <0.05 | 2.36007 |
| 14925253 |                                                                                            |              | <0.05 | 2.36003 |
| 15073562 | ENSECAT00000016219 // CDC73 // cell division cycle 73, Paf1/RNA polymerase II complex c    | CDC73        | <0.05 | 2.35935 |
| 15065320 | ENSECAT00000009335 // AARS // alanyl-tRNA synthetase // --- // 100054983 // XM_0015010     | AARS         | <0.05 | 2.35906 |
| 15044163 | ENSECAT00000011672 // LOC100057755 // constitutive coactivator of PPAR-gamma-like prote    | LOC100057755 | <0.05 | 2.35892 |
| 15003288 | ENSECAT000000026161 // LOC100050585 // s-formylglutathione hydrolase-like // --- // 1000   | LOC100050585 | <0.05 | 2.35847 |
| 15012621 | XM_001501564 // OSBPL1 // oxysterol binding protein-like 11 // --- // 100060459 // EN      | OSBPL1       | <0.05 | 2.35847 |
| 15025669 | XM_001501751 // LOC100062612 // transmembrane protein 184C-like // --- // 100062612 //     | LOC100062612 | <0.05 | 2.35785 |
| 15108589 |                                                                                            |              | <0.05 | 2.35774 |
| 15131753 | ENSECAT000000025881 // LOC100052348 // a-kinase anchor protein 4-like // --- // 10005234   | LOC100052348 | <0.05 | 2.35675 |
| 15069606 | XM_001498400 // DDX19B // DEAD (Asp-Glu-Ala-Asp) box polypeptide 19B // --- // 10006857    | DDX19B       | <0.05 | 2.35672 |
| 14972403 | ENSECAT00000014025 // ACP2 // acid phosphatase 2, lysosomal // --- // 100057910 // XM_     | ACP2         | <0.05 | 2.35653 |
| 14995383 | XM_001498669 // TMF1 // TATA element modulatory factor 1 // --- // 100053441 // ENSECA     | TMF1         | <0.05 | 2.35511 |
| 14965963 | XM_001917560 // LOC100068316 // cyclin-dependent kinase 12-like // --- // 100068316 //     | LOC100068316 | <0.05 | 2.35414 |
| 15031285 | ENSECAT00000011657 // FKBP5 // FK506 binding protein 5 // --- // 100053546 // XM_00149     | FKBP5        | <0.05 | 2.35322 |
| 15061360 | XM_001500736 // LOC100071050 // NADH-cytochrome b5 reductase 3-like // --- // 100071050    | LOC100071050 | <0.05 | 2.3522  |
| 15052962 | XM_001499306 // LOC100069565 // uridine-cytidine kinase 1-like // --- // 100069565 //      | LOC100069565 | <0.05 | 2.35198 |
| 15057173 | XM_001495441 // LOC100058282 // UBX domain-containing protein 8-like // --- // 10005828    | LOC100058282 | <0.05 | 2.35128 |
| 14974840 | ENSECAT00000005115 // LOC100059822 // protein tweety homolog 3-like // --- // 100059822    | LOC100059822 | <0.05 | 2.351   |
| 15036906 | ENSECAT00000015332 // GFRA4 // GDNF family receptor alpha 4 // --- // ---                  | GFRA4        | <0.05 | 2.35082 |
| 14976819 | ENSECAT00000019299 // LOC100050655 // poly(A)-specific ribonuclease PARN-like // --- //    | LOC100050655 | <0.05 | 2.35072 |
| 14948679 | XM_001490994 // LOC100057766 // serine/threonine-protein phosphatase 2A regulatory subu    | LOC100057766 | <0.05 | 2.35071 |
| 15048672 | XM_001496562 // LOC100066214 // DDB1- and CUL4-associated factor 10-like // --- // 1000    | LOC100066214 | <0.05 | 2.3506  |
| 15097256 | ENSECAT000000024043 // MFS5 // major facilitator superfamily domain containing 5 // --- // | MFS5         | <0.05 | 2.35029 |
| 15122538 | ENSECAT00000016194 // EFR3A // EFR3 homolog A (S. cerevisiae) // --- // 100057838 // X     | EFR3A        | <0.05 | 2.34959 |
| 15041337 | ENSECAT00000000099 // LOC100062308 // UPF0308 protein C9orf21-like // --- // 100062308     | LOC100062308 | <0.05 | 2.3494  |
| 15104282 | ENSECAT000000023313 // ATM // ataxia telangiectasia mutated // --- // 100061765            | ATM          | <0.05 | 2.34929 |
| 14986533 | XM_001918095 // LOC100073158 // AP-3 complex subunit sigma-1-like // --- // 100073158 //   | LOC100073158 | <0.05 | 2.3484  |
| 14937788 | ENSECAT000000024286 // BNIP2 // BCL2/adenovirus E1B 19kDa interacting protein 2 // --- //  | BNIP2        | <0.05 | 2.34742 |
| 14967717 |                                                                                            |              | <0.05 | 2.34734 |
| 14953126 | XM_001504242 // RNF146 // ring finger protein 146 // --- // 100067400 // ENSECAT0000000    | RNF146       | <0.05 | 2.34715 |
| 15132403 |                                                                                            |              | <0.05 | 2.34584 |
| 15005384 | XM_001495217 // DIS3 // DIS3 mitotic control homolog (S. cerevisiae) // --- // 10005193    | DIS3         | <0.05 | 2.3457  |
| 15012996 | ENSECAT00000002157 // CD80 // CD80 molecule // --- // ---                                  | CD80         | <0.05 | 2.34538 |
| 15055973 | XM_001491499 // LOC100058661 // TM2 domain-containing protein 2-like // --- // 10005866    | LOC100058661 | <0.05 | 2.34429 |
| 15088736 | ENSECAT000000020999 // LOC100068435 // leucine-rich repeat-containing protein 40-like //   | LOC100068435 | <0.05 | 2.34398 |
| 14938354 | XM_001499778 // SECISBP2L // SECIS binding protein 2-like // --- // 100070100 // ENSE      | SECISBP2L    | <0.05 | 2.34349 |
| 15096465 | ENSECAT00000011054 // LOC100064870 // uncharacterized protein C12orf35-like // --- // 1    | LOC100064870 | <0.05 | 2.34213 |
| 15047065 | ENSECAT00000019613 // ZFYVE26 // zinc finger, FYVE domain containing 26 // --- // 10006    | ZFYVE26      | <0.05 | 2.3416  |
| 15011113 | XM_001503615 // ORC2 // origin recognition complex, subunit 2 // --- // 100067880 // E     | ORC2         | <0.05 | 2.34117 |
| 15118967 |                                                                                            |              | <0.05 | 2.34102 |
| 15091618 | XM_003364988 // ADAMTSL4 // ADAMTS-like 4 // --- // 100059096 // ENSECAT000000020422 //    | ADAMTSL4     | <0.05 | 2.34075 |
| 15044413 | ENSECAT000000020848 // ARID4A // AT rich interactive domain 4A (RBP1-like) // --- // 100   | ARID4A       | <0.05 | 2.34073 |
| 15074458 |                                                                                            |              | <0.05 | 2.34029 |
| 14968547 | ENSECAT00000011785 // LOC100062246 // trafficking protein particle complex subunit 1-l     | LOC100062246 | <0.05 | 2.34001 |
| 14969150 | XM_001488362 // LOC100050478 // phosphoribosyl pyrophosphate synthase-associated protei    | LOC100050478 | <0.05 | 2.33981 |
| 14934479 | XM_001917989 // SUPV3L1 // suppressor of var1, 3-like 1 (S. cerevisiae) // --- // 10007    | SUPV3L1      | <0.05 | 2.33852 |
| 15037048 | ENSECAT00000007007 // LOC100067632 // NSFL1 cofactor p47-like // --- // 100067632 // X     | LOC100067632 | <0.05 | 2.33851 |
| 15014573 | XM_001501086 // LOC100060183 // serine/threonine-protein kinase PAK 2-like // --- // 10    | LOC100060183 | <0.05 | 2.33845 |
| 14961954 | ENSECAT00000016594 // LOC100058999 // transmembrane protein 199-like // --- // 10005899    | LOC100058999 | <0.05 | 2.33817 |

|          |                   |                                                                             |              |        |         |
|----------|-------------------|-----------------------------------------------------------------------------|--------------|--------|---------|
| 15029056 | XM_001498345      | // LOC100068514 // CD2-associated protein-like // --- // 100068514 // ENS   | LOC100068514 | <-0.05 | 2.33733 |
| 15042753 | XM_001496258      | // NAA35 // N(alpha)-acetyltransferase 35, NatC auxiliary subunit // --- /  | NAA35        | <-0.05 | 2.33672 |
| 15120156 | XM_001498811      | // LOC100053377 // haloacid dehalogenase-like hydrolase domain-containing   | LOC100053377 | <-0.05 | 2.33642 |
| 15006497 | XM_001915413      | // CCNT2 // cyclin T2 // --- // 100050510 // ENSECAT0000024357 // CCNT2     | CCNT2        | <-0.05 | 2.33566 |
| 15118724 | ENSECAT0000021600 | // LOC100058709 // diablo homolog, mitochondrial-like // --- // 1000        | LOC100058709 | <-0.05 | 2.33492 |
| 14926723 | ---               | ---                                                                         | ---          | <-0.05 | 2.33459 |
| 15124419 | ENSECAT0000022595 | // LOC100066471 // 39S ribosomal protein L13, mitochondrial-like //         | LOC100066471 | <-0.05 | 2.33453 |
| 15002647 | ---               | ---                                                                         | ---          | <-0.05 | 2.33355 |
| 15035571 | XM_001498159      | // LOC100052705 // NAD(P) transhydrogenase, mitochondrial-like // --- // 1  | LOC100052705 | <-0.05 | 2.33333 |
| 15125111 | ENSECAT0000018149 | // LOC100147640 // plectin-like // --- // 100147640 // ENSECAT00000         | LOC100147640 | <-0.05 | 2.33225 |
| 15067444 | ENSECAT0000026467 | // TEC // tec protein tyrosine kinase // --- // 100061381 // XM_001         | TEC          | <-0.05 | 2.33215 |
| 15101778 | ENSECAT0000018950 | // LOC100058932 // histone-lysine N-methyltransferase MLL2-like // -        | LOC100058932 | <-0.05 | 2.33143 |
| 14983727 | XM_001918332      | // TTC37 // tetratricopeptide repeat domain 37 // --- // 100065001 // ENS   | TTC37        | <-0.05 | 2.33119 |
| 15026873 | ENSECAT0000021397 | // MYLIP // myosin regulatory light chain interacting protein // ---        | MYLIP        | <-0.05 | 2.33003 |
| 14970661 | XM_001489294      | // LOC100054829 // ubiquitin thioesterase OTUB1-like // --- // 100054829 /  | LOC100054829 | <-0.05 | 2.32977 |
| 15109397 | XM_001498937      | // LOC100069130 // DCN1-like protein 5-like // --- // 100069130 // ENSECA   | LOC100069130 | <-0.05 | 2.32908 |
| 15041992 | XM_001493301      | // LOC100051824 // melanoma antigen recognized by T-cells 1-like // --- //  | LOC100051824 | <-0.05 | 2.32908 |
| 15134818 | ---               | ---                                                                         | ---          | <-0.05 | 2.32868 |
| 15137830 | ---               | ---                                                                         | ---          | <-0.05 | 2.32848 |
| 15071487 | ENSECAT0000025747 | // EXOC1 // exocyst complex component 1 // --- // 100059087                 | EXOC1        | <-0.05 | 2.32785 |
| 15089756 | NM_001256902      | // TRIM59 // tripartite motif containing 59 // --- // 100049895 // ENSECA   | TRIM59       | <-0.05 | 2.32768 |
| 14952011 | ---               | ---                                                                         | ---          | <-0.05 | 2.32763 |
| 15044315 | ENSECAT0000017524 | // KTN1 // kinesin 1 (kinesin receptor) // --- // 100050521 // ENS          | KTN1         | <-0.05 | 2.32527 |
| 15070391 | ENSECAT0000022636 | // RAP1GDS1 // RAP1, GTP-GDP dissociation stimulator 1 // --- // ---        | RAP1GDS1     | <-0.05 | 2.32448 |
| 14987684 | ENSECAT0000011814 | // RAD17 // RAD17 homolog (S. pombe) // --- // 100065769 // XM_0015         | RAD17        | <-0.05 | 2.32447 |
| 15061351 | ENSECAT0000019601 | // POLDIP3 // polymerase (DNA-directed), delta interacting protein 3        | POLDIP3      | <-0.05 | 2.32446 |
| 14963988 | ENSECAT0000011767 | // LOC100055613 // hepatocyte growth factor-regulated tyrosine kinas        | LOC100055613 | <-0.05 | 2.32445 |
| 14925287 | ---               | ---                                                                         | ---          | <-0.05 | 2.32434 |
| 15048663 | XM_001504273      | // LOC100066293 // RNA (guanine-9)-methyltransferase domain-containing pr   | LOC100066293 | <-0.05 | 2.32422 |
| 15108310 | ENSECAT0000020331 | // LOC100072557 // uncharacterized protein C11orf46 homolog // --- /        | LOC100072557 | <-0.05 | 2.32388 |
| 15057415 | ENSECAT0000018058 | // LOC100056687 // cytochrome P450 4V2-like // --- // 100056687 //          | LOC100056687 | <-0.05 | 2.32385 |
| 14984074 | XM_001504673      | // POC5 // POC5 centriolar protein homolog (Chlamydomonas) // --- // 10007  | POC5         | <-0.05 | 2.32273 |
| 14929809 | ---               | ---                                                                         | ---          | <-0.05 | 2.32228 |
| 15130174 | XM_001490008      | // LOC100056788 // 60S ribosomal protein L34-like // --- // 100056788 //    | LOC100056788 | <-0.05 | 2.32175 |
| 14981370 | ENSECAT0000011626 | // MGAT4B // mannosyl (alpha-1,3)-glycoprotein beta-1,4-N-acetylglu         | MGAT4B       | <-0.05 | 2.32161 |
| 15008411 | XM_001498513      | // FASTKD2 // FAST kinase domains 2 // --- // 100068684 // ENSECAT0000000   | FASTKD2      | <-0.05 | 2.32155 |
| 14954224 | ENSECAT0000012048 | // TGFBI // transforming growth factor, beta 1 // --- // 100033900 /        | TGFBI        | <-0.05 | 2.32042 |
| 14929687 | ---               | ---                                                                         | ---          | <-0.05 | 2.32    |
| 14996160 | XM_001915582      | // VPRBP // Vpr (HIV-1) binding protein // --- // 100061218 // ENSECAT000   | VPRBP        | <-0.05 | 2.31984 |
| 15023835 | ENSECAT0000001121 | // DD12 // DNA-damage inducible 1 homolog 2 (S. cerevisiae) // --- /        | DD12         | <-0.05 | 2.31952 |
| 15096954 | ENSECAT0000023621 | // ACCN2 // acid-sensing (proton-gated) ion channel 1 // --- // 1000        | ACCN2        | <-0.05 | 2.31861 |
| 15042177 | ENSECAT0000000697 | // DENND4C // DENN/MADD domain containing 4C // --- // 100052312            | DENND4C      | <-0.05 | 2.31834 |
| 15102840 | ---               | ---                                                                         | ---          | <-0.05 | 2.31816 |
| 14937408 | XM_003363658      | // DPP8 // dipeptidyl-peptidase 8 // --- // 100053245 // XM_001497856 //    | DPP8         | <-0.05 | 2.31787 |
| 15047965 | ENSECAT0000013587 | // BTBD7 // BTB (POZ) domain containing 7 // --- // 100053454               | BTBD7        | <-0.05 | 2.31782 |
| 14928147 | ---               | ---                                                                         | ---          | <-0.05 | 2.31737 |
| 14932781 | ENSECAT0000020131 | // LOC100058723 // uncharacterized protein C10orf84-like // --- // 1        | LOC100058723 | <-0.05 | 2.31726 |
| 14969350 | ENSECAT0000025010 | // CSTF3 // cleavage stimulation factor, 3' pre-RNA, subunit 3, 77kD        | CSTF3        | <-0.05 | 2.31688 |
| 15120723 | ENSECAT0000027252 | // ZADH2 // zinc binding alcohol dehydrogenase domain containing 2 /        | ZADH2        | <-0.05 | 2.31681 |
| 15075572 | ENSECAT0000007454 | // SHPRH // SNF2 histone linker PHD RING helicase, E3 ubiquitin prot        | SHPRH        | <-0.05 | 2.31599 |
| 15101686 | ENSECAT0000016868 | // CCNT1 // cyclin T1 // --- // 100033893 // NM_001081846 // CCNT1          | CCNT1        | <-0.05 | 2.31438 |
| 14937776 | NM_001123380      | // ANXA2 // annexin A2 // --- // 100054320 // ENSECAT0000013926 // ANXA2    | ANXA2        | <-0.05 | 2.31338 |
| 14991243 | ENSECAT0000008824 | // LOC100073041 // transmembrane protein 18-like // --- // 100073041        | LOC100073041 | <-0.05 | 2.31229 |
| 14998456 | ENSECAT0000008736 | // HPS3 // Hermansky-Pudlak syndrome 3 // --- // 100058614                  | HPS3         | <-0.05 | 2.31222 |
| 15009986 | XM_001499353      | // OLA1 // Olg-like ATPase 1 // --- // 100053204 // ENSECAT0000017411 //    | OLA1         | <-0.05 | 2.31174 |
| 15021462 | XM_001493315      | // LOC100061338 // non-specific lipid-transfer protein-like // --- // 1000  | LOC100061338 | <-0.05 | 2.31003 |
| 14928213 | ---               | ---                                                                         | ---          | <-0.05 | 2.30904 |
| 15066901 | XM_001488484      | // LOC100050172 // mitochondrial inner membrane protein COX18-like // ---   | LOC100050172 | <-0.05 | 2.30883 |
| 15110265 | ENSECAT0000014843 | // SIAE // sialic acid acetyltransferase // --- // 100072250                | SIAE         | <-0.05 | 2.30839 |
| 15061879 | XM_001491887      | // CUL2 // cullin 2 // --- // 100054982 // ENSECAT0000016792 // CUL2 //     | CUL2         | <-0.05 | 2.30741 |
| 14968520 | ENSECAT0000008309 | // TP53 // tumor protein p53 // --- // 100062044 // NM_001202405 //         | TP53         | <-0.05 | 2.30708 |
| 14933187 | ---               | ---                                                                         | ---          | <-0.05 | 2.30632 |
| 15033267 | XM_001493894      | // LOC100062257 // lipid phosphate phosphohydrolase 1-like // --- // 10006  | LOC100062257 | <-0.05 | 2.30609 |
| 14956701 | XM_001503857      | // FBXL4 // F-box and leucine-rich repeat protein 4 // --- // 100066051 //  | FBXL4        | <-0.05 | 2.30597 |
| 15079262 | XM_003364867      | // LOC100629380 // single-stranded DNA-binding protein, mitochondrial-like  | LOC100629380 | <-0.05 | 2.30593 |
| 14928627 | ---               | ---                                                                         | ---          | <-0.05 | 2.30526 |
| 15082918 | XM_001500519      | // LOC100065055 // modulator of retrovirus infection homolog // --- // 100  | LOC100065055 | <-0.05 | 2.30518 |
| 15058161 | ENSECAT0000029120 | // LOC100629608 // 39S ribosomal protein L42, mitochondrial-like //         | LOC100629608 | <-0.05 | 2.30486 |
| 15099566 | ENSECAT0000010760 | // BCL2L13 // BCL2-like 13 (apoptosis facilitator) // --- // 1000550        | BCL2L13      | <-0.05 | 2.30446 |
| 14983384 | XM_003362836      | // LOC100073160 // ubiquitin-like protein ATG12-like // --- // 100073160 // | LOC100073160 | <-0.05 | 2.30441 |
| 15102842 | XM_001492303      | // LOC100059858 // prostaglandin E synthase 3-like // --- // 100059858 //   | LOC100059858 | <-0.05 | 2.30415 |
| 15079112 | XM_001496985      | // TRIM24 // tripartite motif containing 24 // --- // 100066810 // ENSECA   | TRIM24       | <-0.05 | 2.30382 |
| 15119950 | ENSECAT0000021963 | // LOC100067081 // zinc finger protein 396-like // --- // 100067081         | LOC100067081 | <-0.05 | 2.30279 |
| 15011717 | XM_001495170      | // LOC100058230 // mitofusin-1-like // --- // 100058230 // ENSECAT0000002   | LOC100058230 | <-0.05 | 2.30275 |
| 14962032 | ---               | ---                                                                         | ---          | <-0.05 | 2.302   |
| 15057755 | ENSECAT0000024916 | // FBXO25 // F-box protein 25 // --- // 100051951 // XM_001494835 /         | FBXO25       | <-0.05 | 2.30143 |
| 14992775 | ENSECAT000001823  | // LOC100061904 // RNA-binding protein PNO1-like // --- // 100061904        | LOC100061904 | <-0.05 | 2.30093 |
| 15022824 | ---               | ---                                                                         | ---          | <-0.05 | 2.30082 |
| 15048250 | XM_001491699      | // CDC42BPB // CDC42 binding protein kinase beta (DMPK-like) // --- // 100  | CDC42BPB     | <-0.05 | 2.3008  |
| 15008947 | XM_001490023      | // DARS // aspartyl-tRNA synthetase // --- // 100050898 // ENSECAT0000002   | DARS         | <-0.05 | 2.30061 |
| 14999605 | XM_001489265      | // ABHD6 // abhydrolase domain containing 6 // --- // 100057821 // ENSECA   | ABHD6        | <-0.05 | 2.30028 |
| 15120841 | XM_001915075      | // LOC100057220 // AN1-type zinc finger protein 1-like // --- // 100057220  | LOC100057220 | <-0.05 | 2.29938 |
| 15058116 | XM_001915050      | // TMTC3 // transmembrane and tetratricopeptide repeat containing 3 // ---  | TMTC3        | <-0.05 | 2.2991  |
| 15107893 | ENSECAT0000021058 | // LOC100071555 // fatty acyl-CoA reductase 1-like // --- // 1000715        | LOC100071555 | <-0.05 | 2.29883 |
| 15021209 | XM_003364530      | // TBCK // TBC1 domain containing kinase // --- // 100064433 // ENSECAT00   | TBCK         | <-0.05 | 2.29826 |
| 14938147 | XM_001501499      | // LEO1 // Leo1, Paf1/RNA polymerase II complex component, homolog (S. cer  | LEO1         | <-0.05 | 2.29807 |
| 14966049 | ENSECAT0000000672 | // LOC100055317 // 39S ribosomal protein L45, mitochondrial-like //         | LOC100055317 | <-0.05 | 2.29781 |
| 14986608 | XM_001504579      | // APC // adenomatous polyposis coli // --- // 100064431 // XM_003362839    | APC          | <-0.05 | 2.29764 |
| 15024052 | ENSECAT0000017643 | // MFN2 // mitofusin 2 // --- // ---                                        | MFN2         | <-0.05 | 2.29717 |
| 14966200 | XM_001502391      | // LOC100056039 // prohibitin-like // --- // 100056039 // ENSECAT0000018    | LOC100056039 | <-0.05 | 2.29668 |
| 15090155 | XM_001915627      | // LOC100054392 // neudesisin-like // --- // 100054392 // ENSECAT000001558  | LOC100054392 | <-0.05 | 2.29662 |
| 15109557 | ---               | ---                                                                         | ---          | <-0.05 | 2.29624 |
| 14932023 | ---               | ---                                                                         | ---          | <-0.05 | 2.29603 |
| 15024477 | XM_001492683      | // LOC100060427 // DNA fragmentation factor subunit beta-like // --- // 10  | LOC100060427 | <-0.05 | 2.29576 |
| 15085516 | ENSECAT0000014497 | // LOC100066229 // ubiquitin-fold modifier-conjugating enzyme 1-like        | LOC100066229 | <-0.05 | 2.29548 |
| 14991723 | XM_001493723      | // LOC100061973 // cytochrome c oxidase subunit 5B, mitochondrial-like //   | LOC100061973 | <-0.05 | 2.29524 |
| 14935153 | ENSECAT0000009430 | // ERO1LB // ERO1-like beta (S. cerevisiae) // --- // 100050567 //          | ERO1LB       | <-0.05 | 2.29466 |
| 14976946 | ---               | ---                                                                         | ---          | <-0.05 | 2.29456 |
| 15131559 | XM_001492656      | // CFP // complement factor properdin // --- // 100051317 // ENSECAT00000   | CFP          | <-0.05 | 2.29378 |
| 15003956 | ENSECAT0000005088 | // TPP2 // tripeptidyl peptidase II // --- // 100050973                     | TPP2         | <-0.05 | 2.29354 |
| 14939581 | XM_001502551      | // PARP2 // poly (ADP-ribose) polymerase 2 // --- // 100072572 // ENSECAT   | PARP2        | <-0.05 | 2.29252 |
| 15011383 | ENSECAT0000012896 | // IDH1 // isocitrate dehydrogenase 1 (NADP+), soluble // --- // 100        | IDH1         | <-0.05 | 2.29152 |
| 15131668 | XM_001495045      | // WDR45 // WD repeat domain 45 // --- // 100052044 // ENSECAT00000007316   | WDR45        | <-0.05 | 2.29109 |
| 14929859 | ---               | ---                                                                         | ---          | <-0.05 | 2.2904  |
| 15133485 | ENSECAT0000020006 | // FAM122B // family with sequence similarity 122B // --- // ---            | FAM122B      | <-0.05 | 2.29022 |
| 15091547 | XM_001491678      | // LOC100055347 // tumor necrosis factor alpha-induced protein 8-like prot  | LOC100055347 | <-0.05 | 2.28911 |



|          |                                                                                            |              |       |         |
|----------|--------------------------------------------------------------------------------------------|--------------|-------|---------|
| 14948945 | XM_001496609 // SOS2 // son of sevenless homolog 2 (Drosophila) // --- // 100066282 //     | SOS2         | <0.05 | 2.23967 |
| 15110911 | ---                                                                                        |              | <0.05 | 2.23807 |
| 15054300 | ENSECAT00000016528 // LOC100057570 // splicing factor U2AF 35 kDa subunit-like // --- /    | LOC100057570 | <0.05 | 2.23752 |
| 14993989 | ENSECAT00000008586 // NRBP1 // nuclear receptor binding protein 1 // --- // 100055145 /    | NRBP1        | <0.05 | 2.23752 |
| 15068851 | XM_001915110 // LOC100051355 // cleavage and polyadenylation specificity factor subunit    | LOC100051355 | <0.05 | 2.23713 |
| 14957677 | ENSECAT00000006393 // LOC100073159 // HBS1-like protein-like // --- // 100073159           | LOC100073159 | <0.05 | 2.23697 |
| 15068739 | XM_001490172 // LOC100050450 // AKT-interacting protein-like // --- // 100050450 // EN     | LOC100050450 | <0.05 | 2.23609 |
| 15127834 | XM_001917074 // USP11 // ubiquitin specific peptidase 11 // --- // 100051171 // ENSECA     | USP11        | <0.05 | 2.23606 |
| 15062694 | ---                                                                                        |              | <0.05 | 2.23571 |
| 15130636 | XM_001498198 // LOC100062131 // vesicle-associated membrane protein 7-like // --- // 10    | LOC100062131 | <0.05 | 2.23569 |
| 14994663 | XM_001502898 // LOC100072846 // tetratricopeptide repeat protein 15-like // --- // 1000    | LOC100072846 | <0.05 | 2.23439 |
| 15126702 | ---                                                                                        |              | <0.05 | 2.23395 |
| 14989752 | XM_001498271 // FBXO11 // F-box protein 11 // --- // 100053097 // ENSECAT0000010973 /      | FBXO11       | <0.05 | 2.23393 |
| 14932097 | ---                                                                                        |              | <0.05 | 2.23291 |
| 14964878 | ENSECAT00000018682 // LOC100062972 // guanine nucleotide-binding protein subunit alpha-    | LOC100062972 | <0.05 | 2.23289 |
| 14978946 | ENSECAT000000011475 // LOC100061681 // DNA-directed RNA polymerase III subunit RPC9-like   | LOC100061681 | <0.05 | 2.23287 |
| 14931903 | ---                                                                                        |              | <0.05 | 2.23246 |
| 15042406 | XM_001499590 // UBAP1 // ubiquitin associated protein 1 // --- // 100053997 // ENSECAT     | UBAP1        | <0.05 | 2.23239 |
| 14990184 | XM_001917846 // STRN // striatin, calmodulin binding protein // --- // 100054418 // EN     | STRN         | <0.05 | 2.23228 |
| 14984469 | XM_001502429 // NSD1 // nuclear receptor binding SET domain protein 1 // --- // 1000585    | NSD1         | <0.05 | 2.23221 |
| 15130042 | ENSECAT00000003600 // ZNF449 // zinc finger protein 449 // --- // 100057349 // XM_0014     | ZNF449       | <0.05 | 2.23209 |
| 15001323 | XM_001489975 // PDCD6IP // programmed cell death 6 interacting protein // --- // 100050    | PDCD6IP      | <0.05 | 2.23198 |
| 14940106 | XM_003363553 // LOC100055644 // polyadenylate-binding protein 2-like // --- // 10005564    | LOC100055644 | <0.05 | 2.23189 |
| 15024368 | XM_003364465 // LOC100630321 // uncharacterized LOC100630321 // EN                         | LOC100630321 | <0.05 | 2.23106 |
| 15052495 | XM_001502306 // ZBTB6 // zinc finger and BTB domain containing 6 // --- // 100067456 //    | ZBTB6        | <0.05 | 2.23053 |
| 15117485 | ---                                                                                        |              | <0.05 | 2.23027 |
| 15051784 | ENSECAT00000008409 // LOC100059122 // transmembrane protein C9orf5-like // --- // 10005    | LOC100059122 | <0.05 | 2.22945 |
| 15129773 | ENSECAT000000023019 // STAG2 // stromal antigen 2 // --- // 100055046 // XM_001915150 /    | STAG2        | <0.05 | 2.22922 |
| 15023118 | ENSECAT000000019681 // ARID1A // AT rich interactive domain 1A (SWI-like) // --- //        | ARID1A       | <0.05 | 2.22766 |
| 15000960 | XM_001501861 // LOC100055285 // eukaryotic translation initiation factor 1b-like // ---    | LOC100055285 | <0.05 | 2.22761 |
| 15128147 | NM_001256912 // UBQLN2 // ubiquitin 2 // --- // 100050402                                  | UBQLN2       | <0.05 | 2.22725 |
| 15080090 | ENSECAT00000008489 // LOC100067217 // ubiquitin-protein ligase E3C-like // --- // 10006    | LOC100067217 | <0.05 | 2.22679 |
| 15057200 | XM_001495800 // LOC100062721 // leptin receptor overlapping transcript-like 1-like // -    | LOC100062721 | <0.05 | 2.22641 |
| 15047991 | XM_001497967 // DDX24 // DEAD (Asp-Glu-Ala-Asp) box polypeptide 24 // --- // 100053504     | DDX24        | <0.05 | 2.22637 |
| 15028528 | XM_001500888 // NFYA // nuclear transcription factor Y, alpha // --- // 100054237 // E     | NFYA         | <0.05 | 2.22636 |
| 15041965 | XM_001492144 // LOC100059612 // protein RIC1 homolog // --- // 100059612 // ENSECAT000     | LOC100059612 | <0.05 | 2.22626 |
| 15134976 | ---                                                                                        |              | <0.05 | 2.22563 |
| 15097516 | XM_001504775 // LOC100051308 // biogenesis of lysosome-related organelles complex 1 sub    | LOC100051308 | <0.05 | 2.22539 |
| 15077383 | NM_001257104 // CLDN12 // claudin 12 // --- // 100060361 // ENSECAT00000005680 // CLDN     | CLDN12       | <0.05 | 2.22469 |
| 15038627 | ENSECAT000000026245 // LOC100056464 // guanine nucleotide-binding protein G(s) subunit a   | LOC100056464 | <0.05 | 2.22468 |
| 14952092 | ENSECAT000000011246 // TRIM28 // tripartite motif containing 28 // --- //                  | TRIM28       | <0.05 | 2.22411 |
| 15038603 | ENSECAT00000019946 // LOC100050597 // syntaxin-16-like // --- // 100050597 // XM_00149     | LOC100050597 | <0.05 | 2.22402 |
| 15060265 | ENSECAT000000020822 // LOC100064471 // ubiquitin-conjugating enzyme E2 N-like // --- //    | LOC100064471 | <0.05 | 2.22364 |
| 15096269 | XM_001502130 // LOC100064206 // pyridine nucleotide-disulfide oxidoreductase domain-con    | LOC100064206 | <0.05 | 2.22272 |
| 15052920 | XM_003364107 // LOC100629960 // torsin-1A-like // --- // 100629960 // ENSECAT000000147     | LOC100629960 | <0.05 | 2.22285 |
| 14929753 | ---                                                                                        |              | <0.05 | 2.22239 |
| 15107397 | XM_003365380 // LOC100054490 // tripartite motif-containing protein 5-like // --- // 10    | LOC100054490 | <0.05 | 2.22223 |
| 15128547 | XM_001915329 // MED12 // mediator complex subunit 12 // --- // 100056909 // ENSECAT000     | MED12        | <0.05 | 2.22198 |
| 15032182 | ENSECAT00000019218 // DST // dystonin // --- // 100056885 // ENSECAT00000019286 // DST     | DST          | <0.05 | 2.22155 |
| 14966316 | XM_001499740 // LOC100070058 // ankyrin repeat domain-containing protein 40-like // ---    | LOC100070058 | <0.05 | 2.22149 |
| 15076823 | ENSECAT00000018342 // CDK13 // cyclin-dependent kinase 13 // --- //                        | CDK13        | <0.05 | 2.22135 |
| 14967281 | ENSECAT00000006927 // SLC46A1 // solute carrier family 46 (folate transporter), member     | SLC46A1      | <0.05 | 2.21975 |
| 14944174 | XM_001492833 // LOC100060623 // zinc finger RAD18 domain-containing protein C1orf124 ho    | LOC100060623 | <0.05 | 2.21908 |
| 15123552 | ENSECAT000000020705 // TGS1 // trimethylguanosine synthase 1 // --- // 100067973 // XM_    | TGS1         | <0.05 | 2.21792 |
| 15025423 | ENSECAT000000017141 // TMEM144 // transmembrane protein 144 // --- // 100061910 // XM_0    | TMEM144      | <0.05 | 2.21782 |
| 15096308 | ENSECAT00000007430 // ETKN1 // ethanolamine kinase 1 // --- // 100068424 // XM_0019162     | ETKN1        | <0.05 | 2.21747 |
| 14986452 | XM_003362834 // DMXL1 // Dmx-like 1 // --- // 100064119 // XM_001504549 // DMXL1 // Dm     | DMXL1        | <0.05 | 2.21723 |
| 15089051 | ENSECAT000000022453 // RBBP5 // retinoblastoma binding protein 5 // --- // 100054708 // Dm | RBBP5        | <0.05 | 2.21651 |
| 15119431 | ENSECAT000000027140 // LOC100059211 // uncharacterized protein C18orf8-like // --- // 10   | LOC100059211 | <0.05 | 2.21623 |
| 15028124 | ENSECAT000000021585 // ANKS1A // ankyrin repeat and sterile alpha motif domain containin   | ANKS1A       | <0.05 | 2.2159  |
| 15008523 | XM_001504931 // UGGT1 // UDP-glucosyl glycoprotein glucosyltransferase 1 // --- // 10006   | UGGT1        | <0.05 | 2.21547 |
| 15077485 | ENSECAT000000011565 // LOC100061456 // UPF0712 protein C7orf64-like // --- // 100061456    | LOC100061456 | <0.05 | 2.21435 |
| 15088803 | ENSECAT00000015423 // LOC100069110 // uncharacterized LOC100069110 // --- // 100069110     | LOC100069110 | <0.05 | 2.21431 |
| 14993835 | ENSECAT00000016734 // LOC100071067 // serine/threonine-protein phosphatase PP1-beta cat    | LOC100071067 | <0.05 | 2.21334 |
| 14962611 | ENSECAT00000013793 // NUP88 // nucleoporin 88kDa // --- // 100061117 // XM_001504741 //    | NUP88        | <0.05 | 2.21273 |
| 15132804 | ENSECAT000000022230 // LOC100054590 // 26S proteasome non-ATPase regulatory subunit 10-I   | LOC100054590 | <0.05 | 2.21194 |
| 15022798 | XM_001500028 // LOC100070377 // importin subunit alpha-7-like // --- // 100070377 // E     | LOC100070377 | <0.05 | 2.21185 |
| 14965184 | XM_001499042 // PHIP // pleckstrin homology domain interacting protein // --- // 100069    | PHIP         | <0.05 | 2.21171 |
| 15032956 | XM_001503477 // MAU2 // MAU2 chromatin cohesion factor homolog (C. elegans) // --- // 1    | MAU2         | <0.05 | 2.2116  |
| 14967348 | ENSECAT00000019247 // KIAA0100 // KIAA0100 // --- // ENSECAT00000019280 // KIAA            | KIAA0100     | <0.05 | 2.21115 |
| 15002649 | ---                                                                                        |              | <0.05 | 2.21066 |
| 15052959 | XM_001499008 // LOC100066755 // protein FAM78A-like // --- // 100066755 // ENSECAT0000     | LOC100066755 | <0.05 | 2.21025 |
| 15093028 | ENSECAT000000026949 // PKN2 // protein kinase N2 // --- // 100052266 // XM_001495405 //    | PKN2         | <0.05 | 2.20917 |
| 14972905 | XM_001498329 // OSBP // oxysterol binding protein // --- // 100058845 // ENSECAT000000     | OSBP         | <0.05 | 2.20874 |
| 14974659 | XM_001493987 // LOC100062410 // vacuolar fusion protein CC21 homolog // --- // 10006241    | LOC100062410 | <0.05 | 2.20827 |
| 14935846 | ENSECAT000000018146 // BTBD1 // BTB (POZ) domain containing 1 // --- // 100068143 // XM    | BTBD1        | <0.05 | 2.20796 |
| 14981864 | ENSECAT00000014600 // LOC100059674 // pre-mRNA-splicing factor SLU7-like // --- // 1000    | LOC100059674 | <0.05 | 2.20779 |
| 14943282 | XM_001503722 // LOC100063421 // GTP-binding protein SAR1a-like // --- // 100063421 //      | LOC100063421 | <0.05 | 2.20737 |
| 14933274 | XM_001499233 // LOC100060168 // LIM domain-binding protein 1-like // --- // 100060168 //   | LOC100060168 | <0.05 | 2.20554 |
| 15006753 | XM_001490973 // RIF1 // RAP1 interacting factor homolog (yeast) // --- // 100057721 //     | RIF1         | <0.05 | 2.20537 |
| 14996429 | XM_001497632 // LOC100053200 // nicotin-1-like // --- // 100053200 // ENSECAT000000116     | LOC100053200 | <0.05 | 2.20514 |
| 15026771 | XM_003363705 // LOC100630350 // transmembrane protein 14C-like // --- // 100630350 //      | LOC100630350 | <0.05 | 2.20461 |
| 15073203 | ENSECAT00000015379 // NVL // nuclear VCP-like // --- // 100055652 // XM_001489738 // N     | NVL          | <0.05 | 2.20454 |
| 14993811 | ENSECAT000000025709 // LOC100071019 // WD repeat-containing protein 43-like // --- // 10   | LOC100071019 | <0.05 | 2.20433 |
| 14975909 | XM_001501545 // LOC100065719 // CD2 antigen cytoplasmic tail-binding protein 2-like //     | LOC100065719 | <0.05 | 2.20407 |
| 15123477 | XM_001915768 // CHD7 // chromodomain helicase DNA binding protein 7 // --- // 100052622    | CHD7         | <0.05 | 2.20392 |
| 14985769 | ENSECAT000000028887 // LOC100630045 // ubiquitin-conjugating enzyme E2 D2-like // --- //   | LOC100630045 | <0.05 | 2.20361 |
| 15032975 | XM_001500843 // GATAD2A // GATA zinc finger domain containing 2A // --- // 100071147 //    | GATAD2A      | <0.05 | 2.2035  |
| 14940842 | ENSECAT00000018811 // ZNF717 // zinc finger protein 717 // --- // ENSECAT000000            | ZNF717       | <0.05 | 2.20315 |
| 15116739 | ENSECAT00000008044 // LOC100050782 // lisH domain and HEAT repeat-containing protein KI    | LOC100050782 | <0.05 | 2.20302 |
| 14963562 | ENSECAT00000009563 // ULK2 // unc-51-like kinase 2 (C. elegans) // --- // 100073154 //     | ULK2         | <0.05 | 2.20261 |
| 15070754 | XM_001915383 // CDS1 // CDP-diaclyglycerol synthase (phosphatidate cytidyl)ltransferase    | CDS1         | <0.05 | 2.20255 |
| 15117972 | XM_001496710 // ANKRD13A // ankyrin repeat domain 13A // --- // 100066442 // ENSECAT00     | ANKRD13A     | <0.05 | 2.20233 |
| 15007881 | ENSECAT00000011641 // GLS // glutaminase // --- // 100069617 // XM_001499354 // GLS //     | GLS          | <0.05 | 2.20229 |
| 15095704 | XM_001915524 // USP5 // ubiquitin specific peptidase 5 (isopeptidase T) // --- // 10006    | USP5         | <0.05 | 2.20142 |
| 14971165 | ENSECAT000000026515 // SF3B2 // splicing factor 3b, subunit 2, 145kDa // --- // 10005217   | SF3B2        | <0.05 | 2.20131 |
| 15130532 | XM_003365909 // LOC100630700 // protein FAM50A-like // --- // 100630700 // ENSECAT0000     | LOC100630700 | <0.05 | 2.20056 |
| 15122776 | XM_001495843 // LOC100065171 // repressor of RNA polymerase III transcription MAF1 homo    | LOC100065171 | <0.05 | 2.19969 |
| 14943582 | XM_001503944 // AP3M1 // adaptor-related protein complex 3, mu 1 subunit // --- // 1000    | AP3M1        | <0.05 | 2.1996  |
| 15059155 | ENSECAT000000006610 // LOC100055376 // smith-Magenis syndrome chromosomal region candida   | LOC100055376 | <0.05 | 2.19876 |
| 15023177 | NM_001242455 // SH3BGR3 // SH3 domain binding glutamic acid-rich protein like 3 // ---     | SH3BGR3      | <0.05 | 2.19873 |
| 14940734 | XM_001496247 // LOC100065740 // alpha-1,6-mannosyl-glycoprotein 2-beta-N-acetylglucosam    | LOC100065740 | <0.05 | 2.19808 |
| 15037636 | ENSECAT000000026813 // PHF20 // PHD finger protein 20 // --- // 100055019 // XM_0015018    | PHF20        | <0.05 | 2.1974  |
| 15046289 | ENSECAT00000014118 // WDR20 // WD repeat domain 20 // --- // 100055061 // XM_001917644     | WDR20        | <0.05 | 2.19729 |
| 15080164 | XM_001490684 // RSNB1L // round spermatid basic protein 1-like // --- // 100057295 //      | RSNB1L       | <0.05 | 2.19718 |
| 15068603 | ENSECAT00000014564 // ITFG1 // integrin alpha FG-GAP repeat containing 1 // --- // 1000    | ITFG1        | <0.05 | 2.19714 |

|                                                                                                   |              |        |         |
|---------------------------------------------------------------------------------------------------|--------------|--------|---------|
| 15093703 XM_001500914 // ATG4C // autophagy related 4C, cysteine peptidase // --- // 100054106 /  | ATG4C        | <-0.05 | 2.19709 |
| 14928803 ---                                                                                      |              | <-0.05 | 2.19697 |
| 14936980 XM_001494059 // LOC100062522 // ubiquitin-like protein 7-like // --- // 100062522 /// X  | LOC100062522 | <-0.05 | 2.19628 |
| 15046670 XM_001489495 // DDHD1 // DDHD domain containing 1 // --- // 100055200 /// ENSECAT000000  | DDHD1        | <-0.05 | 2.19613 |
| 15000314 XM_001496577 // RBM5 // RNA binding motif protein 5 // --- // 100052535 /// ENSECAT0000  | RBM5         | <-0.05 | 2.19605 |
| 14970888 XM_001492016 // LOC100056723 // 39S ribosomal protein L49, mitochondrial-like // --- //  | LOC100056723 | <-0.05 | 2.19538 |
| 14967733                                                                                          |              | <-0.05 | 2.19527 |
| 15055292 XM_001492982 // LOC100060848 // Down syndrome critical region protein 3-like // --- //   | LOC100060848 | <-0.05 | 2.19418 |
| 15052813 XM_001500839 // LOC100070261 // probable tRNA pseudouridine synthase 2-like // --- // 1  | LOC100070261 | <-0.05 | 2.19406 |
| 15113421 XM_001489060 // LOC100050121 // small nuclear ribonucleoprotein Sm D3-like // --- // 10  | LOC100050121 | <-0.05 | 2.19302 |
| 15087473 XM_001499579 // AP4B1 // adaptor-related protein complex 4, beta 1 subunit // --- // 10  | AP4B1        | <-0.05 | 2.1924  |
| 15119451 XM_001490337 // LOC100050780 // serine/threonine-protein kinase RIO3-like // --- // 100  | LOC100050780 | <-0.05 | 2.19219 |
| 15043689 ENSECAT00000026587 // LOC100052253 // perilipin-2-like // --- // 100052253 /// XM_00191  | LOC100052253 | <-0.05 | 2.19176 |
| 14973066 XM_001502022 // DDB1 // damage-specific DNA binding protein 1, 127kDa // --- // 1000596  | DDB1         | <-0.05 | 2.19168 |
| 15014004 ENSECAT00000019698 // LOC100058361 // 39S ribosomal protein L47, mitochondrial-like //   | LOC100058361 | <-0.05 | 2.19118 |
| 15039784 ENSECAT00000018124 // LOC100053597 // bcl-2-like protein 1-like // --- // 100053597 ///  | LOC100053597 | <-0.05 | 2.19039 |
| 15080051 ---                                                                                      |              | <-0.05 | 2.18998 |
| 14980162 ---                                                                                      |              | <-0.05 | 2.18974 |
| 15035114 XM_001492047 // SREK1 // splicing regulatory glutamine/lysine-rich protein 1 // --- //   | SREK1        | <-0.05 | 2.18837 |
| 15004676 XM_001493517 // HSPH1 // heat shock 105kDa/110kDa protein 1 // --- // 100062150 /// ENS  | HSPH1        | <-0.05 | 2.18824 |
| 15083667 ---                                                                                      |              | <-0.05 | 2.18803 |
| 15096361 ENSECAT00000025617 // LOC100146613 // serine/threonine-protein kinase 38-like // --- //  | LOC100146613 | <-0.05 | 2.18757 |
| 14931847 ---                                                                                      |              | <-0.05 | 2.1875  |
| 14951145 ---                                                                                      |              | <-0.05 | 2.18725 |
| 14951565 ---                                                                                      |              | <-0.05 | 2.18653 |
| 14928835 ---                                                                                      |              | <-0.05 | 2.18619 |
| 14993122 XM_001497145 // LOC100067003 // endoplasmic reticulum lectin 1-like // --- // 100067003  | LOC100067003 | <-0.05 | 2.18614 |
| 15126616                                                                                          |              | <-0.05 | 2.18611 |
| 15122253 XM_001496257 // LOC100056859 // rRNA-processing protein UTP23 homolog // --- // 1000568  | LOC100056859 | <-0.05 | 2.18527 |
| 15026516 XM_001503217 // TET2 // tet methylcytosine dioxygenase 2 // --- // 100073065 /// ENSECA  | TET2         | <-0.05 | 2.18506 |
| 15048941 XM_001504017 // ZNF189 // zinc finger protein 189 // --- // 100054526 /// ENSECAT000000  | ZNF189       | <-0.05 | 2.18479 |
| 15058963 XM_001916763 // LOC100147078 // ADP-ribosylation factor-binding protein GGA1-like // --  | LOC100147078 | <-0.05 | 2.18405 |
| 15051929 ENSECAT00000022837 // LOC100058146 // proteasome-associated protein ECM29 homolog // --  | LOC100058146 | <-0.05 | 2.18385 |
| 14982662 XM_001504199 // LOC100061972 // pefoldin subunit 1-like // --- // 100061972 /// ENSECA   | LOC100061972 | <-0.05 | 2.18362 |
| 15017509 XM_001504019 // FGR // Gardner-Rasheed feline sarcoma viral (v-fgr) oncogene homolog //  | FGR          | <-0.05 | 2.1834  |
| 15054889 XM_001499999 // LOC100066379 // ATP synthase-coupling factor 6, mitochondrial-like // -  | LOC100066379 | <-0.05 | 2.18315 |
| 15055319 ENSECAT00000020307 // LOC100059615 // proteasome assembly chaperone 1-like // --- // 10  | LOC100059615 | <-0.05 | 2.18314 |
| 14948644 ENSECAT00000008241 // BAZ1A // bromodomain adjacent to zinc finger domain, 1A // --- //  | BAZ1A        | <-0.05 | 2.18205 |
| 15107406 XM_001504451 // LOC100054534 // e3 ubiquitin-protein ligase TRIM22-like // --- // 10005  | LOC100054534 | <-0.05 | 2.18191 |
| 14977467 ---                                                                                      |              | <-0.05 | 2.18173 |
| 15032832 ENSECAT00000018957 // SSBP4 // single stranded DNA binding protein 4 // --- // ---       | SSBP4        | <-0.05 | 2.1816  |
| 14958200 ---                                                                                      |              | <-0.05 | 2.18159 |
| 14930501 ---                                                                                      |              | <-0.05 | 2.18042 |
| 14989648 XM_001497080 // PSME4 // proteasome (prosome, macropain) activator subunit 4 // --- //   | PSME4        | <-0.05 | 2.18035 |
| 14990817 XM_001503315 // PUM2 // pumilio homolog 2 (Drosophila) // --- // 100056370 /// ENSECAT0  | PUM2         | <-0.05 | 2.17977 |
| 15049721 NM_001257178 // ZBTB34 // zinc finger and BTB domain containing 34 // --- // 100070589   | ZBTB34       | <-0.05 | 2.17974 |
| 15016753 ENSECAT00000015888 // LOC100068889 // rhomboid-related protein 2-like // --- // 1000688  | LOC100068889 | <-0.05 | 2.17949 |
| 15068280 XM_003364694 // LOC100070415 // probable tRNA (uracil-O(2)-)-methyltransferase-like //   | LOC100070415 | <-0.05 | 2.17924 |
| 14990088 XM_001500870 // PRKD3 // protein kinase D3 // --- // 100054187 /// ENSECAT00000009228 /  | PRKD3        | <-0.05 | 2.17897 |
| 14928565 ---                                                                                      |              | <-0.05 | 2.17885 |
| 15104403 ENSECAT00000020171 // SIK2 // salt-inducible kinase 2 // --- // 100070391 /// XM_001500  | SIK2         | <-0.05 | 2.17877 |
| 15112785 XM_001504941 // COPB1 // coatomer protein complex, subunit beta 1 // --- // 100056177 /  | COPB1        | <-0.05 | 2.17817 |
| 14926143 ---                                                                                      |              | <-0.05 | 2.17812 |
| 14981880 ENSECAT00000004065 // C5orf54 // chromosome 5 open reading frame 54 // --- // ---        | C5orf54      | <-0.05 | 2.17791 |
| 14991343 XM_001493146 // GCC2 // GRIP and coiled-coil domain containing 2 // --- // 100061081 //  | GCC2         | <-0.05 | 2.17781 |
| 14938058 ENSECAT00000021502 // LOC100069511 // cAMP-regulated phosphoprotein 19-like // --- // 1  | LOC100069511 | <-0.05 | 2.17734 |
| 14985975 ENSECAT00000019747 // DDX46 // DEAD (Asp-Glu-Ala-Asp) box polypeptide 46 // --- // 1000  | DDX46        | <-0.05 | 2.17695 |
| 14943738 ENSECAT00000010965 // COG2 // component of oligomeric golgi complex 2 // --- // 1000653  | COG2         | <-0.05 | 2.17637 |
| 14933535 XM_001501044 // GOT1 // glutamic-oxaloacetic transaminase 1, soluble (aspartate aminotr  | GOT1         | <-0.05 | 2.17446 |
| 14932227 ---                                                                                      |              | <-0.05 | 2.17381 |
| 15118497 ENSECAT00000010509 // MAPKAPK5 // mitogen-activated protein kinase-activated protein ki  | MAPKAPK5     | <-0.05 | 2.17381 |
| 15011849 ENSECAT00000022513 // KLHL24 // kelch-like 24 (Drosophila) // --- // 100058815 /// XM_0  | KLHL24       | <-0.05 | 2.17321 |
| 14958029 ENSECAT00000020648 // LOC100054966 // NAD-dependent deacetylase sirtuin-7-like // --- /  | LOC100054966 | <-0.05 | 2.17274 |
| 14961595 ENSECAT00000024855 // LOC100629929 // zinc finger HIT domain-containing protein 3-like   | LOC100629929 | <-0.05 | 2.17247 |
| 15087392 XM_001500064 // LOC100059469 // GTPase NRas-like // --- // 100059469 /// ENSECAT00000001 | LOC100059469 | <-0.05 | 2.17206 |
| 14995095 XM_001494063 // LOC100051933 // transmembrane protein 111-like // --- // 100051933 ///   | LOC100051933 | <-0.05 | 2.17199 |
| 14933622 XM_001501347 // LOC100060949 // arginine vasopressin-induced protein 1-like // --- // 1  | LOC100060949 | <-0.05 | 2.17108 |
| 15064321 ENSECAT00000008347 // LOC100062499 // ubiquinone biosynthesis protein COQ9, mitochondri  | LOC100062499 | <-0.05 | 2.1708  |
| 15033653 XM_001499483 // NUP155 // nucleoporin 155kDa // --- // 100053405 /// ENSECAT00000007933  | NUP155       | <-0.05 | 2.17068 |
| 15115669 ---                                                                                      |              | <-0.05 | 2.17012 |
| 15018529 ENSECAT00000014686 // LOC100056045 // uncharacterized protein KIAA2013 homolog // --- /  | LOC100056045 | <-0.05 | 2.16928 |
| 14998400 XM_001493057 // U2SURP // U2 snRNP-associated SURP domain containing // --- // 10005118  | U2SURP       | <-0.05 | 2.16887 |
| 14941023 ENSECAT00000000264 // LOC100053051 // glutaredoxin-3-like // --- // 100053051 /// XM_00  | LOC100053051 | <-0.05 | 2.16883 |
| 14978750 ENSECAT00000004244 // BAZ1B // bromodomain adjacent to zinc finger domain, 1B // --- //  | BAZ1B        | <-0.05 | 2.16878 |
| 15004026 XM_001495972 // ABHD13 // abhydrolase domain containing 13 // --- // 100065368 /// ENSE  | ABHD13       | <-0.05 | 2.16846 |
| 15103723 XM_001916832 // LOC100065229 // vimentin-type intermediate filament-associated coiled-c  | LOC100065229 | <-0.05 | 2.16798 |
| 14964801 XM_001916362 // COG1 // component of oligomeric golgi complex 1 // --- // 100061294 ///  | COG1         | <-0.05 | 2.16691 |
| 15005959 ENSECAT00000022446 // COL4A1 // collagen, type IV, alpha 1 // --- // 100066148 /// XM_0  | COL4A1       | <-0.05 | 2.16486 |
| 14930357 ---                                                                                      |              | <-0.05 | 2.16432 |
| 15127342 ENSECAT00000018712 // LOC100060382 // eukaryotic translation initiation factor 2 subuni  | LOC100060382 | <-0.05 | 2.16345 |
| 15012475 XM_001499603 // LOC100069887 // UBX domain-containing protein 7-like // --- // 10006988  | LOC100069887 | <-0.05 | 2.16297 |
| 14989284 XM_001494344 // SPRED2 // sprouty-related, EVH1 domain containing 2 // --- // 100062947  | SPRED2       | <-0.05 | 2.16255 |
| 14930135 ---                                                                                      |              | <-0.05 | 2.16244 |
| 14928155 ---                                                                                      |              | <-0.05 | 2.1622  |
| 14995211 XM_001496698 // CRBN // cereblon // --- // 100052958 /// ENSECAT00000016376 // CRBN //   | CRBN         | <-0.05 | 2.16144 |
| 15063854 NM_001163825 // PHKB // phosphorylase kinase, beta // --- // 100050040 /// ENSECAT00000  | PHKB         | <-0.05 | 2.16094 |
| 15031093 ENSECAT00000021335 // VPS52 // vacuolar protein sorting 52 homolog (S. cerevisiae) // -  | VPS52        | <-0.05 | 2.16076 |
| 15071677 ENSECAT00000013557 // ATP10D // ATPase, class V, type 10D // --- // ---                  | ATP10D       | <-0.05 | 2.16073 |
| 14925643 ---                                                                                      |              | <-0.05 | 2.16064 |
| 15006839 ENSECAT00000019811 // GPD2 // glycerol-3-phosphate dehydrogenase 2 (mitochondrial) // -  | GPD2         | <-0.05 | 2.16044 |
| 14977745 XM_001915417 // TMEM8A // transmembrane protein 8A // --- // 100066625 /// ENSECAT00000  | TMEM8A       | <-0.05 | 2.15986 |
| 15127619 XM_001489437 // USP9X // ubiquitin specific peptidase 9, X-linked // --- // 100050489 /  | USP9X        | <-0.05 | 2.15965 |
| 15115436 XM_003365506 // LOC100630108 // serine/threonine-protein phosphatase PGAM5, mitochondri  | LOC100630108 | <-0.05 | 2.15949 |
| 14975052 ENSECAT00000024438 // ZKSCAN1 // zinc finger with KRAB and SCAN domains 1 // --- // 100  | ZKSCAN1      | <-0.05 | 2.15832 |
| 15065494 ENSECAT00000012579 // GAN // gigaxonin // --- // 100069891 /// XM_001499608 // GAN // g  | GAN          | <-0.05 | 2.15827 |
| 14987821 ENSECAT00000020846 // LOC100060911 // ADP-ribosylation factor 1-like // --- // 10006091  | LOC100060911 | <-0.05 | 2.15817 |
| 15097379 XM_001504569 // LOC100064590 // coatomer subunit zeta-1-like // --- // 100064590 /// EN  | LOC100064590 | <-0.05 | 2.15814 |
| 15012355 ENSECAT00000026313 // OPA1 // optic atrophy 1 (autosomal dominant) // --- // 100059993   | OPA1         | <-0.05 | 2.15813 |
| 14988231                                                                                          |              | <-0.05 | 2.15787 |
| 14940052 ENSECAT00000016572 // LOC100056354 // mitochondrial inner membrane protein OXA1L-like /  | LOC100056354 | <-0.05 | 2.15759 |
| 15012405 ENSECAT00000013029 // DLG1 // discs, large homolog 1 (Drosophila) // --- // 100060094 /  | DLG1         | <-0.05 | 2.15716 |
| 15105451 ENSECAT00000005944 // LOC100072441 // protein FAM118B-like // --- // 100072441 /// XM_0  | LOC100072441 | <-0.05 | 2.15675 |
| 15093971 ENSECAT00000008039 // SMARCAL1 // SWI/SNF related, matrix associated, actin dependent r  | SMARCAL1     | <-0.05 | 2.1561  |
| 14986056 XM_001918224 // HSPA4 // heat shock 70kDa protein 4 // --- // 100072809 /// ENSECAT0000  | HSPA4        | <-0.05 | 2.15552 |
| 14937043 ENSECAT00000008566 // NPTN // neuroplastin // --- // 100052106 /// XM_001493720 // NPTN  | NPTN         | <-0.05 | 2.15511 |
| 14930143 ---                                                                                      |              | <-0.05 | 2.15501 |

|          |                                                                                           |              |        |         |
|----------|-------------------------------------------------------------------------------------------|--------------|--------|---------|
| 15006613 | ENSECAT00000014543 // SPOPL // speckle-type POZ protein-like // --- // 100056551 // XM    | SPOPL        | <-0.05 | 2.15457 |
| 15096349 | ENSECAT00000017757 // LOC100064619 // FGFR1 oncogene partner 2 homolog // --- // 100064   | LOC100064619 | <-0.05 | 2.15391 |
| 14965039 | ENSECAT00000009384 // MAP3K3 // mitogen-activated protein kinase kinase 3 // ---          | MAP3K3       | <-0.05 | 2.15315 |
| 14993281 | ENSECAT00000015683 // EPAS1 // endothelial PAS domain protein 1 // --- // 100068622 //    | EPAS1        | <-0.05 | 2.15192 |
| 15014525 | XM_001499100 // ACAP2 // ArfGAP with coiled-coil, ankyrin repeat and PH domains 2 // ---  | ACAP2        | <-0.05 | 2.15171 |
| 15093394 | XM_001498949 // LOC100053370 // tRNA wbutosine-synthesizing protein 3 homolog // --- /    | LOC100053370 | <-0.05 | 2.15043 |
| 15052575 | ---                                                                                       |              | <-0.05 | 2.15034 |
| 14929837 | ---                                                                                       |              | <-0.05 | 2.14883 |
| 15028723 | ENSECAT00000006940 // LOC100067213 // kelch domain-containing protein 3-like // --- //    | LOC100067213 | <-0.05 | 2.14816 |
| 15119706 | XM_001493386 // ZFP161 // zinc finger protein 161 homolog (mouse) // --- // 100051583 //  | ZFP161       | <-0.05 | 2.14779 |
| 15047576 | XM_001492123 // LOC100059578 // SNW domain-containing protein 1-like // --- // 10005957   | LOC100059578 | <-0.05 | 2.1474  |
| 15086135 | XM_001500077 // LOC100057746 // protein SMG5-like // --- // 100057746 // ENSECAT000000    | LOC100057746 | <-0.05 | 2.14735 |
| 14955261 | XM_001493330 // LOC100056315 // nuclear pore glycoprotein p62-like // --- // 100056315    | LOC100056315 | <-0.05 | 2.14588 |
| 15102236 | ENSECAT00000017267 // SPRYD3 // SPRY domain containing 3 // --- // 100056536 // XM_001    | SPRYD3       | <-0.05 | 2.14575 |
| 15072966 | XM_001492655 // FH // fumarate hydratase // --- // 100060381 // ENSECAT00000022289 //     | FH           | <-0.05 | 2.14558 |
| 14925743 | ---                                                                                       |              | <-0.05 | 2.14554 |
| 15002716 | XM_001493357 // USPL1 // ubiquitin specific peptidase like 1 // --- // 100062086 // EN    | USPL1        | <-0.05 | 2.14472 |
| 14996559 | XM_001498330 // LOC100063232 // glutamine-rich protein 1-like // --- // 100063232 // E    | LOC100063232 | <-0.05 | 2.14471 |
| 15075529 | XM_001501971 // LATS1 // LATS, large tumor suppressor, homolog 1 (Drosophila) // --- //   | LATS1        | <-0.05 | 2.14455 |
| 15013088 | XM_001502881 // SPICE1 // spindle and centriole associated protein 1 // --- // 10006133   | SPICE1       | <-0.05 | 2.14449 |
| 15109600 | ENSECAT00000012956 // PPP2R1B // protein phosphatase 2, regulatory subunit A, beta // -   | PPP2R1B      | <-0.05 | 2.14406 |
| 15070386 | ---                                                                                       |              | <-0.05 | 2.14383 |
| 14935281 | XM_001915071 // RBM34 // RNA binding motif protein 34 // --- // 100146167 // ENSECAT00    | RBM34        | <-0.05 | 2.14382 |
| 15085726 | XM_001504428 // DCAF8 // DDB1 and CUL4 associated factor 8 // --- // 100053669 // ENSE    | DCAF8        | <-0.05 | 2.14341 |
| 15011858 | ENSECAT00000009103 // LOC100066877 // YEATS domain-containing protein 2-like // --- //    | LOC100066877 | <-0.05 | 2.14318 |
| 15081783 | XM_001496289 // SNX13 // sorting nexin 13 // --- // 100066218 // ENSECAT00000023365 //    | SNX13        | <-0.05 | 2.14294 |
| 14927209 | ---                                                                                       |              | <-0.05 | 2.14271 |
| 15055130 | ENSECAT00000006588 // SYNJ1 // synaptojanin 1 // --- // 100052605 // ENSECAT0000000659    | SYNJ1        | <-0.05 | 2.14167 |
| 15115047 | XM_001498352 // LOC100059174 // general transcription factor IIH subunit 3-like // ---    | LOC100059174 | <-0.05 | 2.14166 |
| 14929677 | ---                                                                                       |              | <-0.05 | 2.14075 |
| 14975160 | ENSECAT00000017199 // AGFG2 // ArfGAP with FG repeats 2 // --- // 100068998               | AGFG2        | <-0.05 | 2.14025 |
| 15034792 | XM_001503329 // FKBP8 // FK506 binding protein 8, 38kDa // --- // 100069569 // ENSECAT    | FKBP8        | <-0.05 | 2.14012 |
| 15109512 | ENSECAT00000008687 // LOC100069736 // protein NPAT-like // --- // 100069736 // XM_0019    | LOC100069736 | <-0.05 | 2.13973 |
| 14956999 | XM_001504012 // ZBTB24 // zinc finger and BTB domain containing 24 // --- // 100066674    | ZBTB24       | <-0.05 | 2.13942 |
| 15036366 | XM_001490637 // LOC100057209 // DNA replication complex GINS protein PSF1-like // --- /   | LOC100057209 | <-0.05 | 2.13884 |
| 15118011 | ENSECAT000000009561 // UBE3B // ubiquitin protein ligase E3B // --- // 100059725 // XM_   | UBE3B        | <-0.05 | 2.13836 |
| 14935112 | ENSECAT000000023505 // HEATR1 // HEAT repeat containing 1 // --- // 100050411 // XM_001   | HEATR1       | <-0.05 | 2.13828 |
| 15063264 | XM_003364353 // LOC100055759 // COMM domain-containing protein 3-like // --- // 1000557   | LOC100055759 | <-0.05 | 2.13819 |
| 14975148 | XM_001498760 // MEPCE // methylphosphate capping enzyme // --- // 100068939 // ENSECAT    | MEPCE        | <-0.05 | 2.13732 |
| 15031900 | XM_001502799 // MUT // methylmalonyl CoA mutase // --- // 100055925 // ENSECAT000000008   | MUT          | <-0.05 | 2.13678 |
| 15052029 | ENSECAT000000023356 // ROD1 // polypyrimidine tract binding protein 3 // --- // 10005741  | ROD1         | <-0.05 | 2.13603 |
| 15113166 | XM_001502214 // LOC100072314 // protein lin-7 homolog C-like // --- // 100072314 // EN    | LOC100072314 | <-0.05 | 2.13542 |
| 15120030 | ENSECAT000000004752 // EPG5 // ectopic P-granules autophagy protein 5 homolog (C. elegan  | EPG5         | <-0.05 | 2.13541 |
| 14983423 | ENSECAT00000019193 // LOC100064283 // e3 ubiquitin-protein ligase TRIM36-like // --- //   | LOC100064283 | <-0.05 | 2.13411 |
| 15091346 | ENSECAT000000024229 // INTS3 // integrator complex subunit 3 // --- // 100056524 // XM_   | INTS3        | <-0.05 | 2.13406 |
| 14984203 | ENSECAT00000016268 // LOC100065744 // survival motor neuron protein-like // --- // 1000   | LOC100065744 | <-0.05 | 2.13394 |
| 14925213 | ---                                                                                       |              | <-0.05 | 2.13309 |
| 15115880 | ENSECAT00000015587 // SMCHD1 // structural maintenance of chromosomes flexible hinge do   | SMCHD1       | <-0.05 | 2.13257 |
| 14993161 | ENSECAT000000022186 // KLRAQ1 // protein phosphatase 1, regulatory subunit 21 // --- //   | KLRAQ1       | <-0.05 | 2.13161 |
| 14930235 | ---                                                                                       |              | <-0.05 | 2.13148 |
| 15124385 | ENSECAT000000026272 // TAF2 // TAF2 RNA polymerase II, TATA box binding protein (TBP)-as  | TAF2         | <-0.05 | 2.13123 |
| 15026441 | ENSECAT000000022814 // LOC100072967 // cytochrome P450 2U1-like // --- // 100072967 //    | LOC100072967 | <-0.05 | 2.13116 |
| 15055763 | XM_001488888 // LOC100053953 // RING finger protein 170-like // --- // 100053953 // EN    | LOC100053953 | <-0.05 | 2.13061 |
| 14945994 | ENSECAT000000020910 // ARIH1 // ariadne homolog, ubiquitin-conjugating enzyme E2 binding  | ARIH1        | <-0.05 | 2.12916 |
| 14965839 | XM_001918050 // MSL1 // male-specific lethal 1 homolog (Drosophila) // --- // 100067838   | MSL1         | <-0.05 | 2.12866 |
| 15006280 | XM_001488507 // LOC100050708 // TFIIH basal transcription factor complex helicase XPB s   | LOC100050708 | <-0.05 | 2.12841 |
| 14978770 | ENSECAT000000016225 // LOC100061703 // b-cell CLL/lymphoma 7 protein family member B-like | LOC100061703 | <-0.05 | 2.12827 |
| 15029823 | XM_001495773 // LOC100065066 // coiled-coil domain-containing protein 90A, mitochondria   | LOC100065066 | <-0.05 | 2.12793 |
| 14936384 | XM_001489692 // ASB7 // ankyrin repeat and SOCS box containing 7 // --- // 100050201 //   | ASB7         | <-0.05 | 2.12779 |
| 15005148 | ENSECAT000000018279 // LOC100059040 // kidney mitochondrial carrier protein 1-like // --  | LOC100059040 | <-0.05 | 2.12768 |
| 15008205 | XM_001497300 // LOC100067195 // bone morphogenetic protein receptor type-2-like // ---    | LOC100067195 | <-0.05 | 2.12665 |
| 15053069 | ENSECAT000000010487 // TSC1 // tuberous sclerosis 1 // --- // 100066615                   | TSC1         | <-0.05 | 2.12642 |
| 14976850 | XM_001489900 // GSPT1 // G1 to S phase transition 1 // --- // 100055960 // XM_00336273    | GSPT1        | <-0.05 | 2.12478 |
| 14963398 | ENSECAT000000027173 // MAP2K4 // mitogen-activated protein kinase kinase 4 // --- // 100  | MAP2K4       | <-0.05 | 2.12403 |
| 14926589 | ---                                                                                       |              | <-0.05 | 2.1235  |
| 14948005 | XM_001505163 // METTL3 // methyltransferase like 3 // --- // 100059413 // ENSECAT00000    | METTL3       | <-0.05 | 2.12298 |
| 14978347 | ENSECAT000000014964 // TRIM4 // tripartite motif containing 4 // --- // ---               | TRIM4        | <-0.05 | 2.12229 |
| 15042461 | XM_001497125 // LOC100063025 // serine palmitoyltransferase 1-like // --- // 100063025    | LOC100063025 | <-0.05 | 2.1224  |
| 14932107 | ---                                                                                       |              | <-0.05 | 2.12212 |
| 15126715 | ENSECAT00000000001 // R3HDM4 // R3H domain containing 4 // --- // ---                     | R3HDM4       | <-0.05 | 2.12113 |
| 15092647 | XM_001918140 // LOC100055854 // RNA 3'-terminal phosphate cyclase-like // --- // 100055   | LOC100055854 | <-0.05 | 2.12104 |
| 14928139 | ---                                                                                       |              | <-0.05 | 2.12032 |
| 14973325 | ---                                                                                       |              | <-0.05 | 2.11981 |
| 14940388 | XM_001489169 // G2E3 // G2/M-phase specific E3 ubiquitin protein ligase // --- // 10004   | G2E3         | <-0.05 | 2.11889 |
| 15042696 | ---                                                                                       |              | <-0.05 | 2.11776 |
| 15029308 | XM_001503363 // PHF3 // PHD finger protein 3 // --- // 100057084 // XM_001503364 // PH    | PHF3         | <-0.05 | 2.11715 |
| 14988361 | ---                                                                                       |              | <-0.05 | 2.1165  |
| 15039951 | XM_001501293 // NCOA6 // nuclear receptor coactivator 6 // --- // 100054476 // ENSECAT    | NCOA6        | <-0.05 | 2.11608 |
| 15077251 | ENSECAT00000009328 // CROT // carnitine O-octanoyltransferase // --- // 100050111 // X    | CROT         | <-0.05 | 2.11522 |
| 15021189 | XM_001503578 // PAPSS1 // 3'-phosphoadenosine 5'-phosphosulfate synthase 1 // --- // 10   | PAPSS1       | <-0.05 | 2.11498 |
| 15001061 | ENSECAT000000016498 // EXOG // endo/exonuclease (5'-3'), endonuclease G-like // --- // 1  | EXOG         | <-0.05 | 2.11489 |
| 14925093 | ---                                                                                       |              | <-0.05 | 2.11484 |
| 15034254 | XM_001499057 // LOC100053747 // dnaJ homolog subfamily A member 1-like // --- // 100053   | LOC100053747 | <-0.05 | 2.11451 |
| 15014145 | ENSECAT00000008988 // ABCC5 // ATP-binding cassette, sub-family C (CFTR/MRP), member 5    | ABCC5        | <-0.05 | 2.11439 |
| 15068192 | ENSECAT00000002454 // MRFAP1L1 // Morf4 family associated protein 1-like 1 // --- //      | MRFAP1L1     | <-0.05 | 2.11416 |
| 14940514 | ENSECAT00000012948 // LOC100050727 // protein FAM177A1-like // --- // 100050727 // XM_    | LOC100050727 | <-0.05 | 2.11403 |
| 15017212 | XM_001499806 // YARS // tyrosyl-tRNA synthetase // --- // 100070128 // ENSECAT000000010   | YARS         | <-0.05 | 2.11325 |
| 15113773 | ENSECAT000000025242 // ASCC2 // activating signal cointegrator 1 complex subunit 2 // --  | ASCC2        | <-0.05 | 2.11316 |
| 14951389 | XM_001494108 // LOC100062997 // UPF0510 protein INM02-like // --- // 100062997 // ENSE    | LOC100062997 | <-0.05 | 2.11304 |
| 15099605 | XM_001489654 // IL17RA // interleukin 17 receptor A // --- // 100055511 // ENSECAT0000    | IL17RA       | <-0.05 | 2.11293 |
| 14947963 | XM_003363541 // CHD8 // chromodomain helicase DNA binding protein 8 // --- // 100059337   | CHD8         | <-0.05 | 2.11252 |
| 15064988 | ENSECAT00000000227 // LOC100067168 // cytochrome b5 type B-like // --- // 100067168 //    | LOC100067168 | <-0.05 | 2.11197 |
| 15026504 | ---                                                                                       |              | <-0.05 | 2.11038 |
| 15016599 | XM_001503156 // FOXJ3 // forkhead box J3 // --- // 100053693 // ENSECAT00000009015 //     | FOXJ3        | <-0.05 | 2.1101  |
| 14928153 | ---                                                                                       |              | <-0.05 | 2.10896 |
| 15067660 | ENSECAT00000013372 // PDS5A // PDS5, regulator of cohesion maintenance, homolog A (S. c   | PDS5A        | <-0.05 | 2.10886 |
| 15120225 | XM_001499125 // ACA2 // acetyl-CoA acyltransferase 2 // --- // 100069345 // ENSECAT00     | ACA2         | <-0.05 | 2.10876 |
| 15122997 | XM_001488288 // WWP1 // WW domain containing E3 ubiquitin protein ligase 1 // --- // 10   | WWP1         | <-0.05 | 2.10873 |
| 15130244 | XM_001499390 // LOC100069653 // myotubularin-related protein 1-like // --- // 100069653   | LOC100069653 | <-0.05 | 2.10855 |
| 15040147 | XM_001501819 // RBM39 // RNA binding motif protein 39 // --- // 100054976 // XM_001501    | RBM39        | <-0.05 | 2.10759 |
| 15022437 | XM_001503545 // LOC100054471 // probable U3 small nucleolar RNA-associated protein 11-I   | LOC100054471 | <-0.05 | 2.10759 |
| 14966974 | XM_001501508 // LOC100071676 // zinc finger protein 830-like // --- // 100071676 // EN    | LOC100071676 | <-0.05 | 2.10671 |
| 15064821 | XM_001498725 // DUS2L // dihydrouridine synthase 2-like, SMM1 homolog (S. cerevisiae) /   | DUS2L        | <-0.05 | 2.10601 |
| 14937328 | ---                                                                                       |              | <-0.05 | 2.10567 |
| 14937329 | ---                                                                                       |              | <-0.05 | 2.10567 |
| 15093203 | ENSECAT000000024421 // LOC100052828 // cAMP-dependent protein kinase catalytic subunit b  | LOC100052828 | <-0.05 | 2.10548 |

|          |                                                                                           |              |       |         |
|----------|-------------------------------------------------------------------------------------------|--------------|-------|---------|
| 15092544 | XM_001492903 // PRPF38B // PRP38 pre-mRNA processing factor 38 (yeast) domain containin   | PRPF38B      | <0.05 | 2.10535 |
| 14992917 | ENSECAT00000006018 // LOC100064970 // activator of 90 kDa heat shock protein ATPase hom   | LOC100064970 | <0.05 | 2.105   |
| 15115655 | ENSECAT00000018481 // LOC100050392 // protein spire homolog 1-like // --- // 100050392    | LOC100050392 | <0.05 | 2.1042  |
| 15103852 | ENSECAT00000011283 // XAB2 // XPA binding protein 2 // --- // 100060674 // XM_00191693    | XAB2         | <0.05 | 2.10404 |
| 14994004 | XM_001502317 // SNX17 // sorting nexin 17 // --- // 100055239 // XM_003363022 // SNX17    | SNX17        | <0.05 | 2.10368 |
| 15056738 | ---                                                                                       | ---          | <0.05 | 2.10216 |
| 15031361 | XM_001494965 // STK38 // serine/threonine kinase 38 // --- // 100063891 // ENSECAT00000   | STK38        | <0.05 | 2.10154 |
| 14968611 | XM_001503188 // LOC100073047 // vesicle-associated membrane protein 2-like // --- // 10   | LOC100073047 | <0.05 | 2.10103 |
| 15064466 | ENSECAT00000008835 // SETD6 // SET domain containing 6 // --- // ENSECAT00000000          | SETD6        | <0.05 | 2.10084 |
| 15107038 | XM_001498480 // LOC100052144 // mitochondrial uncoupling protein 2-like // --- // 10005   | LOC100052144 | <0.05 | 2.10069 |
| 14940229 | XM_001490663 // RNF31 // ring finger protein 31 // --- // 100051661 // ENSECAT00000015    | RNF31        | <0.05 | 2.10036 |
| 14979567 | ---                                                                                       | ---          | <0.05 | 2.10029 |
| 15040168 | XM_001501876 // LOC100055060 // SCAN domain-containing protein 1-like // --- // 1000550   | LOC100055060 | <0.05 | 2.10022 |
| 14929833 | ---                                                                                       | ---          | <0.05 | 2.09896 |
| 15061219 | NM_001242478 // RANGAP1 // Ran GTPase activating protein 1 // --- // 100628308 // ENSE    | RANGAP1      | <0.05 | 2.09883 |
| 14990219 | XM_001500160 // LOC100070497 // protein FAM98A-like // --- // 100070497 // ENSECAT0000    | LOC100070497 | <0.05 | 2.09882 |
| 14961638 | ENSECAT00000008813 // AATF // apoptosis antagonizing transcription factor // --- // 100   | AATF         | <0.05 | 2.09851 |
| 14967022 | XM_001918320 // LOC100071770 // 26S proteasome non-ATPase regulatory subunit 11-like //   | LOC100071770 | <0.05 | 2.0985  |
| 14930509 | ---                                                                                       | ---          | <0.05 | 2.09749 |
| 14954698 | XM_001502832 // LOC100065786 // 40S ribosomal protein S17-like // --- // 100065786 //     | LOC100065786 | <0.05 | 2.09726 |
| 15057836 | XM_001488032 // LOC100050038 // putative ataxin-7-like protein 3B-like // --- // 100050   | LOC100050038 | <0.05 | 2.09701 |
| 14932151 | ---                                                                                       | ---          | <0.05 | 2.09642 |
| 15050562 | AF508309 // RPL7A // ribosomal protein L7a // --- // 100033932                            | RPL7A        | <0.05 | 2.09568 |
| 14928709 | ---                                                                                       | ---          | <0.05 | 2.09531 |
| 14985204 | ENSECAT00000018788 // NDST1 // N-deacetylase/N-sulfotransferase (heparan glucosaminyl)    | NDST1        | <0.05 | 2.09486 |
| 15057715 | ENSECAT00000017030 // ARHGEF10 // Rho guanine nucleotide exchange factor (GEF) 10 // --   | ARHGEF10     | <0.05 | 2.09486 |
| 15058331 | ENSECAT000000026768 // APAF1 // apoptotic peptidase activating factor 1 // --- // 100052  | APAF1        | <0.05 | 2.09462 |
| 15060866 | ---                                                                                       | ---          | <0.05 | 2.09453 |
| 15016052 | ENSECAT000000022730 // EPS15 // epidermal growth factor receptor pathway substrate 15 //  | EPS15        | <0.05 | 2.09451 |
| 15014658 | XM_001500039 // UMPS // uridine monophosphate synthetase // --- // 100070386 // ENSECA    | UMPS         | <0.05 | 2.09329 |
| 14927219 | ---                                                                                       | ---          | <0.05 | 2.09298 |
| 14928375 | ---                                                                                       | ---          | <0.05 | 2.09288 |
| 14928463 | ---                                                                                       | ---          | <0.05 | 2.09288 |
| 14928637 | ---                                                                                       | ---          | <0.05 | 2.09283 |
| 15119329 | XM_001488687 // RNMT // RNA (guanine-7-) methyltransferase // --- // 100050190 // ENSE    | RNMT         | <0.05 | 2.09224 |
| 15013585 | ENSECAT00000009151 // LOC100050292 // cyclin-L1-like // --- // 100050292 // XM_0019153    | LOC100050292 | <0.05 | 2.09199 |
| 14996909 | XM_001498841 // SCAP // SREBF chaperone // --- // 100054081 // ENSECAT00000026470 // S    | SCAP         | <0.05 | 2.09199 |
| 14967415 | ENSECAT00000012832 // FLOT2 // flotillin 2 // --- // 100072090 // XM_001501952 // FLOT    | FLOT2        | <0.05 | 2.09189 |
| 15134424 | ---                                                                                       | ---          | <0.05 | 2.09175 |
| 15030704 | XM_001491355 // LOC100058853 // chloride intracellular channel protein 1-like // --- //   | LOC100058853 | <0.05 | 2.09095 |
| 14975401 | ENSECAT000000026013 // SH2B2 // SH2B adaptor protein 2 // --- // 100060578 // XM_001916   | SH2B2        | <0.05 | 2.09091 |
| 15097862 | XM_001488891 // MARS // methionyl-tRNA synthetase // --- // 100053373 // ENSECAT000000    | MARS         | <0.05 | 2.0908  |
| 14976655 | ---                                                                                       | ---          | <0.05 | 2.09064 |
| 15090171 | ---                                                                                       | ---          | <0.05 | 2.09035 |
| 15124125 | ENSECAT000000023585 // SLC25A32 // solute carrier family 25 (mitochondrial folate carrie  | SLC25A32     | <0.05 | 2.08736 |
| 14978575 | XM_001504456 // PLOD3 // procollagen-lysine, 2-oxoglutarate 5-dioxygenase 3 // --- // 1   | PLOD3        | <0.05 | 2.08615 |
| 14930923 | ---                                                                                       | ---          | <0.05 | 2.08592 |
| 15060750 | ---                                                                                       | ---          | <0.05 | 2.08567 |
| 15131157 | XM_001494160 // KLHL15 // kelch-like 15 (Drosophila) // --- // 100052043 // ENSECAT000    | KLHL15       | <0.05 | 2.08517 |
| 15066315 | DQ825759 // ABCG2 // ATP-binding cassette, sub-family G (WHITE), member 2 // --- // 100   | ABCG2        | <0.05 | 2.08418 |
| 15060852 | XM_001500445 // LOC100054528 // eukaryotic translation initiation factor 3 subunit D-li   | LOC100054528 | <0.05 | 2.08384 |
| 15126606 | ---                                                                                       | ---          | <0.05 | 2.08356 |
| 15101117 | XM_001503000 // IPO8 // importin 8 // --- // 100064845 // ENSECAT00000014160 // IPO8 /    | IPO8         | <0.05 | 2.08353 |
| 14985087 | ENSECAT000000018194 // LARP1 // La ribonucleoprotein domain family, member 1 // --- // 1  | LARP1        | <0.05 | 2.08325 |
| 14932195 | ---                                                                                       | ---          | <0.05 | 2.08272 |
| 15108867 | XM_001496144 // KHSRP // KH-type splicing regulatory protein // --- // 100065608 // EN    | KHSRP        | <0.05 | 2.08234 |
| 14976768 | XM_001489539 // LOC100050501 // limkain-b1-like // --- // 100050501 // ENSECAT00000014    | LOC100050501 | <0.05 | 2.08211 |
| 14967728 | ---                                                                                       | ---          | <0.05 | 2.08152 |
| 15136440 | ---                                                                                       | ---          | <0.05 | 2.08134 |
| 15045695 | ENSECAT00000005327 // UBR7 // ubiquitin protein ligase E3 component n-recognin 7 (putat   | UBR7         | <0.05 | 2.08084 |
| 15119990 | ENSECAT000000024782 // LOC100067571 // tubulin polyglutamylase complex subunit 2-like //  | LOC100067571 | <0.05 | 2.08065 |
| 15048622 | ENSECAT000000099721 // LOC100066566 // glyoxylate reductase/hydroxypropylate reductase-li | LOC100066566 | <0.05 | 2.08062 |
| 15125640 | XM_001495962 // HECA // headcase homolog (Drosophila) // --- // 100065354 // ENSECAT00    | HECA         | <0.05 | 2.07941 |
| 14938280 | ---                                                                                       | ---          | <0.05 | 2.07917 |
| 15114349 | ENSECAT00000007800 // LOC100054898 // WD repeat and SOCS box-containing protein 2-like    | LOC100054898 | <0.05 | 2.07877 |
| 14985534 | ENSECAT00000003450 // RNF14 // ring finger protein 14 // --- // ---                       | RNF14        | <0.05 | 2.07842 |
| 14992679 | XM_001490697 // LOC100060958 // u4/U6.U5 small nuclear ribonucleoprotein 27 kDa protein   | LOC100060958 | <0.05 | 2.07835 |
| 15043173 | ENSECAT000000022042 // LOC100055329 // uncharacterized protein C9orf85 homolog // --- //  | LOC100055329 | <0.05 | 2.07824 |
| 15101899 | XM_001915611 // LOC100059723 // probable methyltransferase BCDIN3D-like // --- // 10005   | LOC100059723 | <0.05 | 2.07811 |
| 15135586 | ---                                                                                       | ---          | <0.05 | 2.07808 |
| 15090478 | XM_001503876 // LOC100066365 // upstream stimulatory factor 1-like // --- // 100066365    | LOC100066365 | <0.05 | 2.07766 |
| 15054677 | XM_001489273 // PRMT2 // protein arginine methyltransferase 2 // --- // 100054798 // E    | PRMT2        | <0.05 | 2.07659 |
| 15115769 | XM_001491258 // ESCO1 // establishment of cohesion 1 homolog 1 (S. cerevisiae) // --- //  | ESCO1        | <0.05 | 2.07645 |
| 15068371 | ENSECAT00000002811 // LOC100053044 // uncharacterized LOC100053044 // --- // 100053044    | LOC100053044 | <0.05 | 2.07614 |
| 14943424 | XM_001503827 // ECD // ecdysoneless homolog (Drosophila) // --- // 100063816 // ENSECA    | ECD          | <0.05 | 2.07579 |
| 15002056 | ENSECAT000000012259 // ATR // ataxia telangiectasia and Rad3 related // --- // 100062529  | ATR          | <0.05 | 2.07529 |
| 14929961 | ---                                                                                       | ---          | <0.05 | 2.07513 |
| 14925025 | ---                                                                                       | ---          | <0.05 | 2.07489 |
| 15071375 | ENSECAT00000014599 // LOC100053708 // DNA-directed RNA polymerase II subunit RPB2-like    | LOC100053708 | <0.05 | 2.07488 |
| 14977041 | ENSECAT00000012599 // NAGPA // N-acetylglucosamine-1-phosphodiester alpha-N-acetylgluco   | NAGPA        | <0.05 | 2.07471 |
| 14975442 | XM_001504476 // LOC100059731 // 14-3-3 protein gamma-like // --- // 100059731 // ENSE     | LOC100059731 | <0.05 | 2.07448 |
| 14929579 | ---                                                                                       | ---          | <0.05 | 2.07426 |
| 14953080 | ENSECAT00000015085 // NCOA7 // nuclear receptor coactivator 7 // --- // ---               | NCOA7        | <0.05 | 2.07417 |
| 15117372 | ENSECAT00000018670 // LOC100050855 // crk-like protein-like // --- // 100050855 // XM_    | LOC100050855 | <0.05 | 2.0738  |
| 15101335 | ENSECAT00000012553 // LOC100054055 // YY1-associated factor 2-like // --- // 100054055    | LOC100054055 | <0.05 | 2.07377 |
| 15030606 | ---                                                                                       | ---          | <0.05 | 2.07335 |
| 14962379 | XM_001918354 // PAFAH1B1 // platelet-activating factor acetylhydrolase 1b, regulatory s   | PAFAH1B1     | <0.05 | 2.07294 |
| 15107719 | XM_001500935 // LOC100071230 // switch-associated protein 70-like // --- // 100071230 //  | LOC100071230 | <0.05 | 2.07229 |
| 15031721 | XM_001918236 // XPO5 // exportin 5 // --- // 100067497 // ENSECAT00000003174 // XPO5 /    | XPO5         | <0.05 | 2.07283 |
| 15093950 | ENSECAT000000017868 // XRCC5 // X-ray repair complementing defective repair in Chinese h  | XRCC5        | <0.05 | 2.07259 |
| 15131620 | ENSECAT00000000234 // SLC35A2 // solute carrier family 35 (UDP-galactose transporter),    | SLC35A2      | <0.05 | 2.07254 |
| 14973805 | ---                                                                                       | ---          | <0.05 | 2.07228 |
| 14971483 | NM_001081937 // AIP // aryl hydrocarbon receptor interacting protein // --- // 10003414   | AIP          | <0.05 | 2.07219 |
| 15006113 | ENSECAT000000009719 // LOC100067830 // u3 small nucleolar ribonucleoprotein protein IMP4  | LOC100067830 | <0.05 | 2.07152 |
| 15017409 | ENSECAT000000025685 // LOC100070525 // syndecan-3-like // --- // 100070525 // XM_001500   | LOC100070525 | <0.05 | 2.06933 |
| 14932047 | ---                                                                                       | ---          | <0.05 | 2.06885 |
| 15053773 | XM_001915095 // GABPA // GA binding protein transcription factor, alpha subunit 60kDa /   | GABPA        | <0.05 | 2.06793 |
| 15036139 | XM_001501048 // LOC100071310 // methionine synthase reductase-like // --- // 100071310    | LOC100071310 | <0.05 | 2.06789 |
| 14928369 | ---                                                                                       | ---          | <0.05 | 2.06728 |
| 14928457 | ---                                                                                       | ---          | <0.05 | 2.06728 |
| 14949709 | XM_001495128 // ZNF829 // zinc finger protein 829 // --- // 100061841 // ENSECAT0000000   | ZNF829       | <0.05 | 2.0672  |
| 14978952 | ENSECAT000000011515 // LOC100629446 // vitamin K epoxide reductase complex subunit 1-lik  | LOC100629446 | <0.05 | 2.06719 |
| 15092580 | ENSECAT00000022478 // LOC100054806 // RNA-binding protein 40-like // --- // 100054806 //  | LOC100054806 | <0.05 | 2.06674 |
| 14971861 | XM_001494530 // LOC100056151 // CD151 antigen-like // --- // 100056151 // ENSECAT00000    | LOC100056151 | <0.05 | 2.06668 |
| 15015902 | XM_001493380 // LOC100061450 // enoyl-CoA hydratase domain-containing protein 2, mitoch   | LOC100061450 | <0.05 | 2.06652 |
| 15018401 | XM_001488662 // FBXO42 // F-box protein 42 // --- // 100053402 // ENSECAT00000019734 /    | FBXO42       | <0.05 | 2.06631 |

|          |                                                                                          |              |       |         |
|----------|------------------------------------------------------------------------------------------|--------------|-------|---------|
| 14967254 | ENSECAT0000014913 // POLDIP2 // polymerase (DNA-directed), delta interacting protein 2   | POLDIP2      | <0.05 | 2.0661  |
| 14985124 | ENSECAT0000018975 // MFAP3 // microfibrillar-associated protein 3 // --- // 100071417    | MFAP3        | <0.05 | 2.06588 |
| 15117284 | XM_001489018 // LOC100054251 // cationic amino acid transporter 4-like // --- // 100054  | LOC100054251 | <0.05 | 2.06532 |
| 15017354 | ENSECAT0000022702 // LOC100056122 // peflin-like // --- // 100056122 // XM_001503887     | LOC100056122 | <0.05 | 2.06404 |
| 14952375 | ---                                                                                      |              | <0.05 | 2.06396 |
| 14951144 | ---                                                                                      |              | <0.05 | 2.06394 |
| 15056743 | XM_001488824 // HOOK3 // hook homolog 3 (Drosophila) // --- // 100053799 // ENSECAT000   | HOOK3        | <0.05 | 2.06361 |
| 15017453 | XM_001500352 // LOC100070682 // transcription initiation factor TFIID subunit 12-like /  | LOC100070682 | <0.05 | 2.06359 |
| 15123661 | XM_001487951 // MCM4 // minichromosome maintenance complex component 4 // --- // 100051  | MCM4         | <0.05 | 2.06314 |
| 15003831 | ENSECAT0000013783 // RAP2A // RAP2A, member of RAS oncogene family // --- // ---         | RAP2A        | <0.05 | 2.06293 |
| 15083683 | ENSECAT0000024323 // LOC100064812 // histone-lysine N-methyltransferase MLL3-like // -   | LOC100064812 | <0.05 | 2.06247 |
| 14948331 | XM_001489831 // LOC100051307 // NEDD8-like // --- // 100051307 // ENSECAT0000020444 /    | LOC100051307 | <0.05 | 2.06235 |
| 14946749 | ENSECAT00000012768 // LOC100055565 // DTW domain-containing protein 1-like // --- // 10  | LOC100055565 | <0.05 | 2.06202 |
| 15045306 | XM_001490655 // LOC100057247 // translation initiation factor eIF-2B subunit beta-like   | LOC100057247 | <0.05 | 2.06086 |
| 15001745 | ENSECAT00000016925 // TOPBP1 // topoisomerase (DNA) // binding protein 1 // --- // ---   | TOPBP1       | <0.05 | 2.06082 |
| 15084578 | XM_001916737 // LOC100052982 // glycosaminoglycan xylosylkinase-like // --- // 10005298  | LOC100052982 | <0.05 | 2.06079 |
| 15061096 | XM_001501639 // LOC100055255 // josephin-1-like // --- // 100055255 // ENSECAT00000016   | LOC100055255 | <0.05 | 2.05993 |
| 15079673 | XM_001504627 // LOC100051217 // culin-1-like // --- // 100051217 // ENSECAT000001061     | LOC100051217 | <0.05 | 2.05948 |
| 15041752 | ENSECAT0000023310 // PTAR1 // protein prenyltransferase alpha subunit repeat containin   | PTAR1        | <0.05 | 2.05913 |
| 14989117 | XM_001492476 // LOC100060120 // protein TEX261-like // --- // 100060120 // ENSECAT00000  | LOC100060120 | <0.05 | 2.05873 |
| 14980166 | ENSECAT00000010995 // ERCC4 // excision repair cross-complementing rodent repair defici  | ERCC4        | <0.05 | 2.05871 |
| 14928409 | ---                                                                                      |              | <0.05 | 2.05867 |
| 14928497 | ---                                                                                      |              | <0.05 | 2.05867 |
| 15049214 | ENSECAT0000020834 // LOC100050369 // high affinity copper uptake protein 1-like // ---   | LOC100050369 | <0.05 | 2.05715 |
| 15134480 | ---                                                                                      |              | <0.05 | 2.057   |
| 14927257 | ---                                                                                      |              | <0.05 | 2.05685 |
| 15054355 | XM_001916663 // LOC100057293 // ribosomal RNA processing protein 1 homolog A-like // --  | LOC100057293 | <0.05 | 2.05662 |
| 15060291 | ENSECAT00000016715 // LOC100065070 // NADH dehydrogenase [ubiquinone] 1 alpha subcomple  | LOC100065070 | <0.05 | 2.05632 |
| 14968425 | ---                                                                                      |              | <0.05 | 2.05578 |
| 15002575 | ENSECAT00000016748 // NUPL1 // nucleoporin like 1 // --- // ---                          | NUPL1        | <0.05 | 2.05553 |
| 15116567 | ENSECAT00000012726 // LOC100070157 // uncharacterized protein C18orf54-like // --- // 1  | LOC100070157 | <0.05 | 2.05474 |
| 14939313 | XM_001501580 // ZNF770 // zinc finger protein 770 // --- // 100071735 // ENSECAT0000000  | ZNF770       | <0.05 | 2.05471 |
| 15077192 | ENSECAT00000024482 // LANCL2 // LanC lantibiotic synthetase component C-like 2 (bacteri  | LANCL2       | <0.05 | 2.05429 |
| 14929709 | ---                                                                                      |              | <0.05 | 2.05358 |
| 15042691 | ENSECAT00000020140 // LOC100629615 // uncharacterized protein C9orf102-like // --- // 1  | LOC100629615 | <0.05 | 2.0533  |
| 15094398 | XM_001496411 // LOC100056818 // rhomboid domain-containing protein 1-like // --- // 100  | LOC100056818 | <0.05 | 2.05303 |
| 14930803 | ---                                                                                      |              | <0.05 | 2.05298 |
| 15112875 | XM_001504950 // PIK3C2A // phosphoinositide-3-kinase, class 2, alpha polypeptide // --   | PIK3C2A      | <0.05 | 2.05265 |
| 15030673 | XM_001490934 // ABHD16A // abhydrolase domain containing 16A // --- // 100058736 // EN   | ABHD16A      | <0.05 | 2.05257 |
| 14981991 | ENSECAT00000017014 // LOC100630177 // t-cell immunoglobulin and mucin domain-containing  | LOC100630177 | <0.05 | 2.05234 |
| 14989613 | XM_001496741 // LOC100052589 // translation initiation factor IF-2, mitochondrial-like   | LOC100052589 | <0.05 | 2.05203 |
| 15102337 | ENSECAT00000024651 // LOC100064131 // ATP synthase lipid-binding protein, mitochondrial  | LOC100064131 | <0.05 | 2.05129 |
| 14965520 | ENSECAT00000007802 // NBR1 // neighbor of BRCA1 gene 1 // --- // 100051928 // XM_00336   | NBR1         | <0.05 | 2.05054 |
| 14990246 | XM_001917878 // LOC100147678 // protein MEMO1-like // --- // 100147678 // ENSECAT00000   | LOC100147678 | <0.05 | 2.04944 |
| 15041424 | ENSECAT00000015870 // ZCHC6 // zinc finger, CCHC domain containing 6 // --- // 1000616   | ZCHC6        | <0.05 | 2.04862 |
| 14960190 | XM_001495646 // ACLY // ATP citrate lyase // --- // 100053195 // ENSECAT0000010787 //    | ACLY         | <0.05 | 2.04847 |
| 14928161 | ---                                                                                      |              | <0.05 | 2.04836 |
| 14931977 | ---                                                                                      |              | <0.05 | 2.0477  |
| 15018831 | ENSECAT00000013774 // NOL9 // nucleolar protein 9 // --- // ---                          | NOL9         | <0.05 | 2.04732 |
| 14976858 | ENSECAT00000027038 // RSL1D1 // ribosomal L1 domain containing 1 // --- // ---           | RSL1D1       | <0.05 | 2.04701 |
| 15070101 | ENSECAT00000022571 // LOC100050994 // protein PIEZO1-like // --- // 100050994            | LOC100050994 | <0.05 | 2.04699 |
| 14965997 | ---                                                                                      |              | <0.05 | 2.04673 |
| 15000138 | ENSECAT00000014540 // LOC100147234 // testis-expressed sequence 264 protein-like // ---  | LOC100147234 | <0.05 | 2.04606 |
| 15109812 | XM_001502605 // PCSK7 // proprotein convertase subtilisin/kexin type 7 // --- // 100062  | PCSK7        | <0.05 | 2.04596 |
| 14952077 | ---                                                                                      |              | <0.05 | 2.04586 |
| 14950479 | ENSECAT00000018056 // LOC100070361 // zinc finger protein 283-like // --- // 100070361   | LOC100070361 | <0.05 | 2.04534 |
| 15108855 | ENSECAT00000000324 // LOC100065544 // general transcription factor IF subunit 1-like /   | LOC100065544 | <0.05 | 2.04509 |
| 14975363 | XM_001492538 // LOC100060194 // AP-1 complex subunit sigma-1A-like // --- // 100060194   | LOC100060194 | <0.05 | 2.04433 |
| 14976098 | ENSECAT00000007759 // ATXN2L // ataxin 2-like // --- // 100066373 // XM_001496666 // A   | ATXN2L       | <0.05 | 2.04304 |
| 14968881 | ENSECAT000000027158 // LOC100073084 // protein SCO1 homolog, mitochondrial-like // --- / | LOC100073084 | <0.05 | 2.04299 |
| 15074336 | ENSECAT00000019433 // RAB3GAP2 // RAB3 GTPase activating protein subunit 2 (non-catalyt  | RAB3GAP2     | <0.05 | 2.04291 |
| 15108809 | XM_001495919 // LOC100065287 // ran-binding protein 3-like // --- // 100065287 // ENSE   | LOC100065287 | <0.05 | 2.04165 |
| 15060677 | ENSECAT00000022563 // APLP2 // amyloid beta (A4) precursor-like protein 2 // --- // 100  | APLP2        | <0.05 | 2.04144 |
| 14976661 | ---                                                                                      |              | <0.05 | 2.04123 |
| 14977869 | XM_001494582 // ARPC1A // actin related protein 2/3 complex, subunit 1A, 41kDa // --- /  | ARPC1A       | <0.05 | 2.041   |
| 15035449 | XM_001494494 // LOC100063168 // NADH dehydrogenase [ubiquinone] iron-sulfur protein 4,   | LOC100063168 | <0.05 | 2.04044 |
| 15048112 | XM_001489195 // ATG2B // autophagy related 2B // --- // 100054652 // ENSECAT0000000401   | ATG2B        | <0.05 | 2.04038 |
| 15069905 | XM_003364642 // MBTPS1 // membrane-bound transcription factor peptidase, site 1 // ---   | MBTPS1       | <0.05 | 2.0402  |
| 14996061 | XM_001493474 // BAP1 // BRCA1 associated protein-1 (ubiquitin carboxy-terminal hydrolas  | BAP1         | <0.05 | 2.03987 |
| 14935414 | ENSECAT00000017306 // FAM89A // family with sequence similarity 89, member A // --- //   | FAM89A       | <0.05 | 2.03962 |
| 15076301 | ENSECAT00000024588 // LOC100065954 // uncharacterized LOC100065954 // --- // 100065954   | LOC100065954 | <0.05 | 2.03934 |
| 14971511 | ENSECAT00000008593 // ALDH3B1 // aldehyde dehydrogenase 3 family, member B1 // --- // 1  | ALDH3B1      | <0.05 | 2.03905 |
| 15101022 | XM_001502728 // LOC100064589 // cell cycle regulator Mat89Bb homolog // --- // 10006458  | LOC100064589 | <0.05 | 2.0389  |
| 15124487 | XM_001497735 // FBXO32 // F-box protein 32 // --- // 100057506 // ENSECAT00000017032 /   | FBXO32       | <0.05 | 2.03854 |
| 14966655 | XM_001503751 // LOC100057442 // tubulin delta chain-like // --- // 100057442 // ENSECA   | LOC100057442 | <0.05 | 2.03828 |
| 15031242 | ENSECAT00000000392 // LOC100053157 // uncharacterized protein C6orf106 homolog // --- /  | LOC100053157 | <0.05 | 2.03813 |
| 15130093 | ENSECAT00000009431 // LOC100054669 // HIV Tat-specific factor 1 homolog // --- // 10005  | LOC100054669 | <0.05 | 2.03807 |
| 15089991 | ENSECAT00000022989 // TPR // translocated promoter region, nuclear basket protein // --  | TPR          | <0.05 | 2.03779 |
| 15007112 | XM_001916894 // PPIG // peptidylprolyl isomerase G (cyclophilin G) // --- // 100052595   | PPIG         | <0.05 | 2.03748 |
| 15116254 | XM_001916080 // ELP2 // elongation protein 2 homolog (S. cerevisiae) // --- // 10005293  | ELP2         | <0.05 | 2.0373  |
| 15082609 | ENSECAT00000009237 // POT1 // protection of telomeres 1 homolog (S. pombe) // --- // 10  | POT1         | <0.05 | 2.0367  |
| 15039160 | XM_001489907 // LOC100061304 // n-alpha-acetyltransferase 20, NatB catalytic subunit-li  | LOC100061304 | <0.05 | 2.03626 |
| 14926381 | ---                                                                                      |              | <0.05 | 2.03624 |
| 15134270 | ---                                                                                      |              | <0.05 | 2.03597 |
| 14930271 | ---                                                                                      |              | <0.05 | 2.03586 |
| 15004218 | ENSECAT00000020697 // CUL4A // culin 4A // --- // 100033930 // ENSECAT00000020701 //     | CUL4A        | <0.05 | 2.03566 |
| 14928127 | ---                                                                                      |              | <0.05 | 2.03471 |
| 15025290 | ENSECAT00000011464 // KLHL2 // kelch-like 2, Mayven (Drosophila) // --- // 100068150 //  | KLHL2        | <0.05 | 2.03433 |
| 14954131 | XM_001499052 // LOC100068129 // SERTA domain-containing protein 3-like // --- // 100068  | LOC100068129 | <0.05 | 2.03379 |
| 14965410 | XM_001489741 // GRN // granulin // --- // 100051035 // ENSECAT0000019589 // GRN // gr    | GRN          | <0.05 | 2.03367 |
| 14986793 | ENSECAT00000019464 // LOC100073220 // RGM domain family member B-like // --- // 1000732  | LOC100073220 | <0.05 | 2.03356 |
| 14953947 | ENSECAT00000013350 // HNRNPL // heterogeneous nuclear ribonucleoprotein L // --- // 100  | HNRNPL       | <0.05 | 2.03326 |
| 14969442 | XM_001503314 // PDHX // pyruvate dehydrogenase complex, component X // --- // 100059260  | PDHX         | <0.05 | 2.03315 |
| 14934905 | XM_001503972 // LOC100064276 // voltage-dependent anion-selective channel protein 2-like | LOC100064276 | <0.05 | 2.03284 |
| 15089102 | ENSECAT00000006690 // ELK4 // ELK4, ETS-domain protein (SRF accessory protein 1) // ---  | ELK4         | <0.05 | 2.03232 |
| 14995794 | ENSECAT00000010119 // FAM208A // family with sequence similarity 208, member A // --- /  | FAM208A      | <0.05 | 2.03137 |
| 15006148 | ---                                                                                      |              | <0.05 | 2.03132 |
| 15072116 | XM_001499564 // ZCHC4 // zinc finger, CCHC domain containing 4 // --- // 100067435 //    | ZCHC4        | <0.05 | 2.03079 |
| 15000948 | ---                                                                                      |              | <0.05 | 2.03059 |
| 15063432 | NM_001243145 // VIM // vimentin // --- // 100056088 // ENSECAT00000006522 // VIM // vi   | VIM          | <0.05 | 2.03047 |
| 14952827 | ENSECAT00000014894 // LOC100072366 // general transcription factor 3C polypeptide 6-like | LOC100072366 | <0.05 | 2.03006 |
| 15053039 | XM_001499227 // DDX31 // DEAD (Asp-Glu-Ala-Asp) box polypeptide 31 // --- // 100069463   | DDX31        | <0.05 | 2.0296  |
| 14965992 | ---                                                                                      |              | <0.05 | 2.02889 |
| 14949997 | ENSECAT00000016592 // SAMD4B // sterile alpha motif domain containing 4B // --- // 1000  | SAMD4B       | <0.05 | 2.02737 |
| 14927637 | ---                                                                                      |              | <0.05 | 2.02643 |
| 14952430 | ENSECAT00000007519 // SLC35A1 // solute carrier family 35 (CMP-sialic acid transporter)  | SLC35A1      | <0.05 | 2.0263  |





|          |                                                                                          |              |       |          |
|----------|------------------------------------------------------------------------------------------|--------------|-------|----------|
| 14966267 | ENSECAT00000020087 // COL1A1 // collagen, type I, alpha 1 // --- // --- // ENSECAT0000   | COL1A1       | <0.05 | -2.01609 |
| 15128740 | ---                                                                                      |              | <0.05 | -2.017   |
| 15024391 | NR_032793 // MIR1302-1 // microRNA mir-1302-1 // --- // 100315099                        | MIR1302-1    | <0.05 | -2.01736 |
| 15092259 | ---                                                                                      |              | <0.05 | -2.01749 |
| 15027584 | ---                                                                                      |              | <0.05 | -2.01812 |
| 15049011 | XM_001493810 // LOC100062119 // putative olfactory receptor ENSP00000348552-like // ---  | LOC100062119 | <0.05 | -2.01822 |
| 14929167 | ---                                                                                      |              | <0.05 | -2.01944 |
| 15020197 | ---                                                                                      |              | <0.05 | -2.01944 |
| 15037024 | XM_001497665 // LOC100053108 // proenkephalin-B-like // --- // 100053108 // ENSECAT000   | LOC100053108 | <0.05 | -2.02004 |
| 15012098 | XM_001497358 // LOC100067260 // transmembrane epididymal protein 1-like // --- // 10006  | LOC100067260 | <0.05 | -2.02038 |
| 15046040 | ---                                                                                      |              | <0.05 | -2.0214  |
| 14954392 | ENSECAT00000007789 // LOC100629397 // seminal plasma protein A3-like // --- // 10062939  | LOC100629397 | <0.05 | -2.02168 |
| 15136736 | ---                                                                                      |              | <0.05 | -2.02221 |
| 15087836 | ---                                                                                      |              | <0.05 | -2.02291 |
| 15136954 | ---                                                                                      |              | <0.05 | -2.02291 |
| 14934007 | XM_001500917 // LOC100071214 // phospholipase A2-like // --- // 100071214 // ENSECAT00   | LOC100071214 | <0.05 | -2.02313 |
| 15106405 | XM_001494305 // LOC100062882 // olfactory receptor 7G3-like // --- // 100062882 // ENS   | LOC100062882 | <0.05 | -2.0232  |
| 15136712 | ---                                                                                      |              | <0.05 | -2.02339 |
| 15109554 | ---                                                                                      |              | <0.05 | -2.02426 |
| 15124978 | ---                                                                                      |              | <0.05 | -2.02604 |
| 14931789 | ---                                                                                      |              | <0.05 | -2.02664 |
| 14948474 | ---                                                                                      |              | <0.05 | -2.02697 |
| 14925623 | ---                                                                                      |              | <0.05 | -2.03004 |
| 14982360 | ---                                                                                      |              | <0.05 | -2.03045 |
| 15107652 | ---                                                                                      |              | <0.05 | -2.03049 |
| 14985875 | XM_001502601 // WNT8A // wingless-type MMTV integration site family, member 8A // --- /  | WNT8A        | <0.05 | -2.0305  |
| 15048016 | NM_001114533 // SPI2 // alpha-1-antitrypsin // --- // 100065158 // AB455571 // SPI2 //   | SPI2         | <0.05 | -2.03077 |
| 15135866 | ---                                                                                      |              | <0.05 | -2.03077 |
| 15058240 | XM_001494836 // ELK3 // ELK3, ETS-domain protein (SRF accessory protein 2) // --- // 10  | ELK3         | <0.05 | -2.03209 |
| 14929803 | ---                                                                                      |              | <0.05 | -2.03261 |
| 14927197 | ---                                                                                      |              | <0.05 | -2.03277 |
| 14950850 | XM_001503145 // LOC100065997 // c5a anaphylatoxin chemotactic receptor-like // --- // 1  | LOC100065997 | <0.05 | -2.03301 |
| 15012958 | ENSECAT00000019225 // LOC100070833 // follistatin-related protein 1-like // --- // 1000  | LOC100070833 | <0.05 | -2.03313 |
| 15070376 | ---                                                                                      |              | <0.05 | -2.03325 |
| 15136832 | ---                                                                                      |              | <0.05 | -2.03325 |
| 14927235 | ---                                                                                      |              | <0.05 | -2.03369 |
| 14929105 | ---                                                                                      |              | <0.05 | -2.03386 |
| 14957606 | XM_001504334 // LOC100073120 // trace amine-associated receptor 8a-like // --- // 10007  | LOC100073120 | <0.05 | -2.03538 |
| 14927569 | ---                                                                                      |              | <0.05 | -2.03647 |
| 14927231 | ---                                                                                      |              | <0.05 | -2.03728 |
| 14926195 | ---                                                                                      |              | <0.05 | -2.03736 |
| 15070990 | ENSECAT00000026028 // FAM47E // family with sequence similarity 47, member E // --- //   | FAM47E       | <0.05 | -2.038   |
| 15090301 | NR_032842 // MIR205 // microRNA mir-205 // --- // 100314810                              | MIR205       | <0.05 | -2.03837 |
| 14986407 | ---                                                                                      |              | <0.05 | -2.03909 |
| 15063751 | ---                                                                                      |              | <0.05 | -2.03925 |
| 14926703 | ---                                                                                      |              | <0.05 | -2.03935 |
| 15096771 | ENSECAT00000007241 // LOC100051004 // uncharacterized protein C12orf68 homolog // --- /  | LOC100051004 | <0.05 | -2.03945 |
| 14953790 | ---                                                                                      |              | <0.05 | -2.03969 |
| 15071098 | ENSECAT00000016212 // IL8 // interleukin 8 // --- // 100037400 // NM_001083951 // IL8    | IL8          | <0.05 | -2.03993 |
| 15107855 | ENSECAT00000009242 // TEAD1 // TEA domain family member 1 (SV40 transcriptional enhance  | TEAD1        | <0.05 | -2.04003 |
| 15132171 | ---                                                                                      |              | <0.05 | -2.04045 |
| 14962413 | ---                                                                                      |              | <0.05 | -2.04127 |
| 14988276 | XM_001493078 // LOC100051611 // dual specificity protein phosphatase 2-like // --- // 1  | LOC100051611 | <0.05 | -2.04178 |
| 15100237 | ENSECAT00000013235 // LOC100061006 // homeobox protein NANOG-like // --- // 100061006    | LOC100061006 | <0.05 | -2.04249 |
| 15080674 | ---                                                                                      |              | <0.05 | -2.04374 |
| 15107732 | ---                                                                                      |              | <0.05 | -2.0451  |
| 15042379 | ---                                                                                      |              | <0.05 | -2.04612 |
| 15107282 | ---                                                                                      |              | <0.05 | -2.04639 |
| 14979496 | NM_001081774 // IL4R // interleukin 4 receptor // --- // 791252 // ENSECAT00000023156    | IL4R         | <0.05 | -2.04688 |
| 15136942 | ---                                                                                      |              | <0.05 | -2.04907 |
| 14928855 | ---                                                                                      |              | <0.05 | -2.05023 |
| 15027232 | ---                                                                                      |              | <0.05 | -2.05071 |
| 14952309 | ---                                                                                      |              | <0.05 | -2.05264 |
| 14936247 | ---                                                                                      |              | <0.05 | -2.05323 |
| 14928941 | ---                                                                                      |              | <0.05 | -2.05398 |
| 15110167 | XM_001501622 // LOC100071772 // olfactory receptor 8D4-like // --- // 100071772 // ENS   | LOC100071772 | <0.05 | -2.05452 |
| 15051287 | XM_001504497 // LOC100055542 // tropomyosin beta chain-like // --- // 100055542 // ENS   | LOC100055542 | <0.05 | -2.05876 |
| 15136578 | ---                                                                                      |              | <0.05 | -2.05901 |
| 14930363 | ---                                                                                      |              | <0.05 | -2.05955 |
| 15059967 | ---                                                                                      |              | <0.05 | -2.05997 |
| 14939564 | XM_001502491 // LOC100072530 // olfactory receptor 11H7-like // --- // 100072530 // EN   | LOC100072530 | <0.05 | -2.0602  |
| 12910873 | ---                                                                                      |              | <0.05 | -2.06223 |
| 12910881 | ---                                                                                      |              | <0.05 | -2.06223 |
| 15126585 | ---                                                                                      |              | <0.05 | -2.06236 |
| 14926295 | ---                                                                                      |              | <0.05 | -2.06242 |
| 14983353 | ---                                                                                      |              | <0.05 | -2.06253 |
| 15099149 | XM_001495017 // LOC100063969 // G-protein coupled receptor 55-like // --- // 100063969   | LOC100063969 | <0.05 | -2.06428 |
| 14956770 | ENSECAT00000008095 // LOC100066146 // melanin-concentrating hormone receptor 2-like //   | LOC100066146 | <0.05 | -2.06431 |
| 15108327 | XM_001502680 // LOC100072670 // reticulocalbin-1-like // --- // 100072670 // ENSECAT00   | LOC100072670 | <0.05 | -2.06432 |
| 15124500 | ENSECAT000000022962 // LOC100067174 // annexin A13-like // --- // 100067174              | LOC100067174 | <0.05 | -2.06511 |
| 14931465 | ---                                                                                      |              | <0.05 | -2.06537 |
| 14986506 | ENSECAT00000008997 // LOC100064195 // uncharacterized protein C11orf46 homolog // --- /  | LOC100064195 | <0.05 | -2.06754 |
| 15120981 | ---                                                                                      |              | <0.05 | -2.06834 |
| 15111265 | XM_001493466 // LOC100061569 // olfactory receptor 7D4-like // --- // 100061569 // ENS   | LOC100061569 | <0.05 | -2.06904 |
| 14940063 | ENSECAT00000009008 // MMP14 // matrix metalloproteinase 14 (membrane-inserted) // --- // | MMP14        | <0.05 | -2.06931 |
| 14928533 | ---                                                                                      |              | <0.05 | -2.07024 |
| 14951864 | XM_003362300 // LOC100629902 // vomeronasal type-1 receptor 1-like // --- // 100629902   | LOC100629902 | <0.05 | -2.07074 |
| 15007033 | ---                                                                                      |              | <0.05 | -2.07203 |
| 15026283 | ---                                                                                      |              | <0.05 | -2.07357 |
| 15075229 | ---                                                                                      |              | <0.05 | -2.07371 |
| 14953625 | ENSECAT00000027119 // SBSN // suprabasin // --- // ---                                   | SBSN         | <0.05 | -2.07443 |
| 15078650 | ---                                                                                      |              | <0.05 | -2.07476 |
| 14961281 | ---                                                                                      |              | <0.05 | -2.07484 |
| 15091037 | ENSECAT00000008851 // SEMA4A // sema domain, immunoglobulin domain (Ig), transmembrane   | SEMA4A       | <0.05 | -2.07733 |
| 15006416 | ENSECAT00000005374 // C1QL2 // complement component 1, q subcomponent-like 2 // --- //   | C1QL2        | <0.05 | -2.07738 |
| 15112421 | XM_001499853 // LOC100070187 // olfactory receptor 6-like // --- // 100070187 // ENSEC   | LOC100070187 | <0.05 | -2.07744 |
| 14926809 | ---                                                                                      |              | <0.05 | -2.07833 |
| 15056320 | ENSECAT00000014155 // FAT1 // FAT tumor suppressor homolog 1 (Drosophila) // --- // 100  | FAT1         | <0.05 | -2.07834 |
| 14927475 | ---                                                                                      |              | <0.05 | -2.07971 |
| 14928115 | ---                                                                                      |              | <0.05 | -2.07971 |
| 14943917 | ---                                                                                      |              | <0.05 | -2.08049 |
| 15137174 | ---                                                                                      |              | <0.05 | -2.08159 |
| 15135264 | ---                                                                                      |              | <0.05 | -2.08162 |
| 14984969 | ---                                                                                      |              | <0.05 | -2.08235 |
| 15057831 | ---                                                                                      |              | <0.05 | -2.08428 |
| 14928553 | ---                                                                                      |              | <0.05 | -2.08457 |

|                                                                                                   |              |  |  |  |       |          |
|---------------------------------------------------------------------------------------------------|--------------|--|--|--|-------|----------|
| 15020465 ---                                                                                      |              |  |  |  | <0.05 | -2.08487 |
| 14983337 ---                                                                                      |              |  |  |  | <0.05 | -2.08489 |
| 14974963 ---                                                                                      |              |  |  |  | <0.05 | -2.08636 |
| 15021046 ---                                                                                      |              |  |  |  | <0.05 | -2.08733 |
| 14967613 XM_001502177 // LOC100072280 // diazepam-binding inhibitor-like 5-like // --- // 100072  | LOC100072280 |  |  |  | <0.05 | -2.08759 |
| 14926061 ---                                                                                      |              |  |  |  | <0.05 | -2.0881  |
| 15072947 ENSECAT00000016295 // MIR1255B // microRNA mir-1255b // --- // 100314985                 | MIR1255B     |  |  |  | <0.05 | -2.08815 |
| 15057592 ---                                                                                      |              |  |  |  | <0.05 | -2.08822 |
| 14927957 ---                                                                                      |              |  |  |  | <0.05 | -2.091   |
| 15110165 XM_001501618 // LOC100071766 // olfactory receptor 6M1-like // --- // 100071766 // ENS   | LOC100071766 |  |  |  | <0.05 | -2.09196 |
| 15123206 ---                                                                                      |              |  |  |  | <0.05 | -2.09197 |
| 14941799 ---                                                                                      |              |  |  |  | <0.05 | -2.09245 |
| 15000659 XM_001496089 // CCR9 // chemokine (C-C motif) receptor 9 // --- // 100065535 // ENSECA   | CCR9         |  |  |  | <0.05 | -2.09308 |
| 15026146 XM_001916288 // USP53 // ubiquitin specific peptidase 53 // --- // 100072411 // ENSECA   | USP53        |  |  |  | <0.05 | -2.09336 |
| 15113452 ---                                                                                      |              |  |  |  | <0.05 | -2.09389 |
| 14969918 XM_001489062 // LOC100054355 // olfactory receptor 1030-like // --- // 100054355 // EN   | LOC100054355 |  |  |  | <0.05 | -2.09413 |
| 15093714 ENSECAT00000008704 // ANGPTL3 // angiopoietin-like 3 // --- // 100054159 // XM_0015010   | ANGPTL3      |  |  |  | <0.05 | -2.09414 |
| 14926153 ---                                                                                      |              |  |  |  | <0.05 | -2.09511 |
| 15002995 ENSECAT00000004403 // LOC100062457 // uncharacterized protein C13orf36-like // --- // 1  | LOC100062457 |  |  |  | <0.05 | -2.09753 |
| 14931599 ---                                                                                      |              |  |  |  | <0.05 | -2.09805 |
| 15058329 ---                                                                                      |              |  |  |  | <0.05 | -2.0988  |
| 15058330 ---                                                                                      |              |  |  |  | <0.05 | -2.0988  |
| 15071992 ---                                                                                      |              |  |  |  | <0.05 | -2.09969 |
| 15016922 XM_001499027 // CSF3R // colony stimulating factor 3 receptor (granulocyte) // --- // 1  | CSF3R        |  |  |  | <0.05 | -2.10044 |
| 15034562 XM_001914909 // LOC100070775 // olfactory receptor 10H4-like // --- // 100070775 // EN   | LOC100070775 |  |  |  | <0.05 | -2.10058 |
| 15046170 NR_033032 // MIR487A // microRNA mir-487a // --- // 100314913                            | MIR487A      |  |  |  | <0.05 | -2.10111 |
| 15033035 ---                                                                                      |              |  |  |  | <0.05 | -2.10113 |
| 14951763 ---                                                                                      |              |  |  |  | <0.05 | -2.1015  |
| 15093251 ---                                                                                      |              |  |  |  | <0.05 | -2.102   |
| 14931283 ---                                                                                      |              |  |  |  | <0.05 | -2.10209 |
| 15104828 XM_001503043 // LOC100063180 // uroplakin-2-like // --- // 100063180 // ENSECAT0000001   | LOC100063180 |  |  |  | <0.05 | -2.10474 |
| 15085955 XM_001500763 // LOC100064714 // ETS translocation variant 3-like // --- // 100064714 //  | LOC100064714 |  |  |  | <0.05 | -2.10514 |
| 15062884 XM_001496461 // LOC100066044 // olfactory receptor 2T33-like // --- // 100066044 // EN   | LOC100066044 |  |  |  | <0.05 | -2.10659 |
| 15109386 NM_001081804 // MMP13 // matrix metalloproteinase 13 (collagenase 3) // --- // 100009711 | MMP13        |  |  |  | <0.05 | -2.10697 |
| 15107293 ---                                                                                      |              |  |  |  | <0.05 | -2.10715 |
| 15023530 ---                                                                                      |              |  |  |  | <0.05 | -2.1072  |
| 14936389 XM_001490555 // ALDH1A3 // aldehyde dehydrogenase 1 family, member A3 // --- // 1000570  | ALDH1A3      |  |  |  | <0.05 | -2.10783 |
| 15137322 ---                                                                                      |              |  |  |  | <0.05 | -2.10886 |
| 14943309 XM_001503727 // LOC100063458 // leucine-rich repeat-containing protein 20-like // --- // | LOC100063458 |  |  |  | <0.05 | -2.10901 |
| 15137528 ---                                                                                      |              |  |  |  | <0.05 | -2.10998 |
| 14991679 ENSECAT00000011743 // LOC100061333 // cyclic nucleotide-gated cation channel alpha-3-li  | LOC100061333 |  |  |  | <0.05 | -2.11037 |
| 14932349 ---                                                                                      |              |  |  |  | <0.05 | -2.11101 |
| 14949069 XM_001497325 // LOC100067227 // nidogen-2-like // --- // 100067227 // ENSECAT000000166   | LOC100067227 |  |  |  | <0.05 | -2.11135 |
| 14989035 ---                                                                                      |              |  |  |  | <0.05 | -2.1114  |
| 15137784 ---                                                                                      |              |  |  |  | <0.05 | -2.1114  |
| 14934452 ---                                                                                      |              |  |  |  | <0.05 | -2.1117  |
| 15134892 ---                                                                                      |              |  |  |  | <0.05 | -2.11382 |
| 15131323 ---                                                                                      |              |  |  |  | <0.05 | -2.11445 |
| 15099403 XM_001497223 // LOC100067104 // olfactory receptor 6B2-like // --- // 100067104 // ENS   | LOC100067104 |  |  |  | <0.05 | -2.11463 |
| 14955834 ENSECAT00000015199 // IL11 // interleukin 11 // --- //                                   | IL11         |  |  |  | <0.05 | -2.11467 |
| 14996102 NM_001081790 // TLR9 // toll-like receptor 9 // --- // 100009693 // ENSECAT00000014884   | TLR9         |  |  |  | <0.05 | -2.11484 |
| 15080372 ---                                                                                      |              |  |  |  | <0.05 | -2.11488 |
| 15129015 ---                                                                                      |              |  |  |  | <0.05 | -2.11509 |
| 15019043 NR_032807 // MIR551A // microRNA mir-551a // --- // 100315040                            | MIR551A      |  |  |  | <0.05 | -2.11509 |
| 14972723 ---                                                                                      |              |  |  |  | <0.05 | -2.11532 |
| 14930735 ---                                                                                      |              |  |  |  | <0.05 | -2.11659 |
| 15084466 ---                                                                                      |              |  |  |  | <0.05 | -2.11726 |
| 14952181 ---                                                                                      |              |  |  |  | <0.05 | -2.11778 |
| 14987334 XM_001504666 // LOC100073277 // proteinase-activated receptor 2-like // --- // 10007327  | LOC100073277 |  |  |  | <0.05 | -2.11827 |
| 14950253 ---                                                                                      |              |  |  |  | <0.05 | -2.11866 |
| 14927759 ---                                                                                      |              |  |  |  | <0.05 | -2.11876 |
| 15078697 ---                                                                                      |              |  |  |  | <0.05 | -2.11901 |
| 14972623 ---                                                                                      |              |  |  |  | <0.05 | -2.1191  |
| 14928883 ---                                                                                      |              |  |  |  | <0.05 | -2.11948 |
| 14972641 ---                                                                                      |              |  |  |  | <0.05 | -2.11975 |
| 14931045 ---                                                                                      |              |  |  |  | <0.05 | -2.11997 |
| 14926241 ---                                                                                      |              |  |  |  | <0.05 | -2.12191 |
| 14982656 ENSECAT00000010964 // LOC100629956 // uncharacterized LOC100629956 // --- // 100629956   | LOC100629956 |  |  |  | <0.05 | -2.12253 |
| 14946843 ---                                                                                      |              |  |  |  | <0.05 | -2.12373 |
| 15124206 ---                                                                                      |              |  |  |  | <0.05 | -2.12403 |
| 15020620 ---                                                                                      |              |  |  |  | <0.05 | -2.12575 |
| 15049266 ENSECAT00000021954 // ZNF618 // zinc finger protein 618 // --- // 100051828              | ZNF618       |  |  |  | <0.05 | -2.12695 |
| 15132547 ---                                                                                      |              |  |  |  | <0.05 | -2.12793 |
| 15014995 ---                                                                                      |              |  |  |  | <0.05 | -2.12835 |
| 15088053 ENSECAT00000010311 // LOC100051002 // rho GTPase-activating protein 29-like // --- // 1  | LOC100051002 |  |  |  | <0.05 | -2.12906 |
| 15121319 ---                                                                                      |              |  |  |  | <0.05 | -2.13099 |
| 14939007 ENSECAT00000018492 // LOC100071046 // EH domain-containing protein 4-like // --- // 100  | LOC100071046 |  |  |  | <0.05 | -2.13109 |
| 15058862 ENSECAT00000019359 // TIMP3 // TIMP metalloproteinase inhibitor 3 // --- // 100033947 // | TIMP3        |  |  |  | <0.05 | -2.13144 |
| 14974966 XM_001489025 // PRKAR1B // protein kinase, cAMP-dependent, regulatory, type I, beta //   | PRKAR1B      |  |  |  | <0.05 | -2.13169 |
| 14939795 ENSECAT00000011369 // LOC100629138 // uncharacterized LOC100629138 // --- // 100629138   | LOC100629138 |  |  |  | <0.05 | -2.13226 |
| 14965215 ---                                                                                      |              |  |  |  | <0.05 | -2.13356 |
| 14925679 ---                                                                                      |              |  |  |  | <0.05 | -2.13545 |
| 14925909 ---                                                                                      |              |  |  |  | <0.05 | -2.13545 |
| 15112287 XM_001499184 // LOC100069414 // olfactory receptor 52H1-like // --- // 100069414 // EN   | LOC100069414 |  |  |  | <0.05 | -2.13679 |
| 15046762 ---                                                                                      |              |  |  |  | <0.05 | -2.13748 |
| 15043508 ---                                                                                      |              |  |  |  | <0.05 | -2.13753 |
| 15077149 ---                                                                                      |              |  |  |  | <0.05 | -2.13911 |
| 15039029 ---                                                                                      |              |  |  |  | <0.05 | -2.14082 |
| 15136380 ---                                                                                      |              |  |  |  | <0.05 | -2.14152 |
| 15025088 ---                                                                                      |              |  |  |  | <0.05 | -2.14173 |
| 15112823 ---                                                                                      |              |  |  |  | <0.05 | -2.14217 |
| 14967427 NR_032913 // MIR451 // microRNA mir-451 // --- // 100315060                              | MIR451       |  |  |  | <0.05 | -2.14245 |
| 15020805 ---                                                                                      |              |  |  |  | <0.05 | -2.14501 |
| 14929143 ---                                                                                      |              |  |  |  | <0.05 | -2.14585 |
| 14931929 ---                                                                                      |              |  |  |  | <0.05 | -2.1463  |
| 15016202 ---                                                                                      |              |  |  |  | <0.05 | -2.14656 |
| 15089239 ENSECAT00000000241 // FCAMR // Fc receptor, IgA, IgM, high affinity // --- // ---        | FCAMR        |  |  |  | <0.05 | -2.14675 |
| 15003284 NM_001081784 // HTR2A // 5-hydroxytryptamine (serotonin) receptor 2A, G protein-coupled  | HTR2A        |  |  |  | <0.05 | -2.14696 |
| 14926649 ---                                                                                      |              |  |  |  | <0.05 | -2.14764 |
| 15112485 ---                                                                                      |              |  |  |  | <0.05 | -2.15017 |
| 14937089 ---                                                                                      |              |  |  |  | <0.05 | -2.15136 |
| 15084526 ---                                                                                      |              |  |  |  | <0.05 | -2.15166 |
| 15029435 ---                                                                                      |              |  |  |  | <0.05 | -2.15173 |
| 15011496 ---                                                                                      |              |  |  |  | <0.05 | -2.15182 |
| 15072196 ---                                                                                      |              |  |  |  | <0.05 | -2.15287 |
| 15109767 ---                                                                                      |              |  |  |  | <0.05 | -2.1537  |

|          |                                                                                          |              |                |
|----------|------------------------------------------------------------------------------------------|--------------|----------------|
| 15018117 | ---                                                                                      | <0.05        | -2.15376       |
| 14929069 | ---                                                                                      | <0.05        | -2.15405       |
| 14929505 | ---                                                                                      | <0.05        | -2.15405       |
| 14929909 | ---                                                                                      | <0.05        | -2.15557       |
| 14985315 | NR_032935 // MIR143 // microRNA mir-143 // --- // 100314979                              | MIR143       | <0.05 -2.15673 |
| 15136400 | ---                                                                                      | <0.05        | -2.15769       |
| 14929901 | ---                                                                                      | <0.05        | -2.15811       |
| 14951749 | NM_001256845 // NCR1 // natural cytotoxicity triggering receptor 1 // --- // 100054918   | NCR1         | <0.05 -2.15978 |
| 15067801 | ---                                                                                      | <0.05        | -2.16113       |
| 15112196 | XM_001498150 // LOC100068286 // olfactory receptor 52M1-like // --- // 100068286 /// EN  | LOC100068286 | <0.05 -2.16115 |
| 14927633 | ---                                                                                      | <0.05        | -2.16201       |
| 15083867 | ---                                                                                      | <0.05        | -2.1624        |
| 15042338 | ---                                                                                      | <0.05        | -2.16267       |
| 15116468 | ENSECAT00000016251 // LIPG // lipase, endothelial // --- // 100053762 /// XM_001499159   | LIPG         | <0.05 -2.16445 |
| 14929605 | ---                                                                                      | <0.05        | -2.16508       |
| 14925723 | ---                                                                                      | <0.05        | -2.16701       |
| 15016687 | ENSECAT00000012770 // LOC100068351 // microtubule-associated proteins 1A/1B light chain  | LOC100068351 | <0.05 -2.1671  |
| 15095042 | XM_001497244 // LOC100067126 // olfactory receptor 12-like // --- // 100067126 /// ENSE  | LOC100067126 | <0.05 -2.16712 |
| 14927325 | ---                                                                                      | <0.05        | -2.16718       |
| 14927349 | ---                                                                                      | <0.05        | -2.16718       |
| 14927373 | ---                                                                                      | <0.05        | -2.16718       |
| 14927397 | ---                                                                                      | <0.05        | -2.16718       |
| 15005050 | ---                                                                                      | <0.05        | -2.16755       |
| 15063686 | ---                                                                                      | <0.05        | -2.16834       |
| 14952608 | ---                                                                                      | <0.05        | -2.16915       |
| 15047019 | ---                                                                                      | <0.05        | -2.16927       |
| 15049206 | ---                                                                                      | <0.05        | -2.17          |
| 15083262 | ---                                                                                      | <0.05        | -2.17022       |
| 14939891 | ENSECAT00000013494 // TRAV30 // T cell receptor alpha variable 30 // --- // ---          | TRAV30       | <0.05 -2.17042 |
| 15046142 | NR_033036 // MIR495 // microRNA mir-495 // --- // 100315115                              | MIR495       | <0.05 -2.17149 |
| 15091406 | ENSECAT00000010407 // LOC100061730 // protein S100-A9-like // --- // 100061730 /// XM_0  | LOC100061730 | <0.05 -2.17191 |
| 15124434 | ---                                                                                      | <0.05        | -2.17204       |
| 14927841 | ---                                                                                      | <0.05        | -2.17288       |
| 15093926 | ---                                                                                      | <0.05        | -2.17297       |
| 14927697 | ---                                                                                      | <0.05        | -2.17385       |
| 14926047 | ---                                                                                      | <0.05        | -2.17444       |
| 14939536 | XM_001502286 // LOC100072368 // olfactory receptor 4F3/4F16/4F29-like // --- // 1000723  | LOC100072368 | <0.05 -2.17452 |
| 15106002 | ---                                                                                      | <0.05        | -2.17547       |
| 14925353 | ---                                                                                      | <0.05        | -2.17582       |
| 15106372 | ---                                                                                      | <0.05        | -2.17583       |
| 14926359 | ---                                                                                      | <0.05        | -2.17621       |
| 15081980 | XM_001498848 // LOC100054053 // FMRFamide-related peptides-like // --- // 100054053 ///  | LOC100054053 | <0.05 -2.17831 |
| 14947737 | ENSECAT00000006789 // LOC100072163 // olfactory receptor 4F3/4F16/4F29-like // --- // 1  | LOC100072163 | <0.05 -2.17927 |
| 15137724 | ---                                                                                      | <0.05        | -2.17938       |
| 14941018 | ---                                                                                      | <0.05        | -2.1806        |
| 15117446 | ---                                                                                      | <0.05        | -2.18083       |
| 14940594 | ---                                                                                      | <0.05        | -2.18165       |
| 15087838 | ENSECAT00000012045 // VAV3 // vav 3 guanine nucleotide exchange factor // --- // 100057  | VAV3         | <0.05 -2.18338 |
| 15136830 | ---                                                                                      | <0.05        | -2.18414       |
| 15131883 | ---                                                                                      | <0.05        | -2.18537       |
| 14928041 | ---                                                                                      | <0.05        | -2.18605       |
| 15089731 | ---                                                                                      | <0.05        | -2.18694       |
| 15027238 | ---                                                                                      | <0.05        | -2.18848       |
| 14927179 | ---                                                                                      | <0.05        | -2.18866       |
| 15046062 | ---                                                                                      | <0.05        | -2.18925       |
| 15125830 | ---                                                                                      | <0.05        | -2.18926       |
| 15042289 | ENSECAT00000020238 // DMRTA1 // DMRT-like family A1 // --- // ---                        | DMRTA1       | <0.05 -2.19167 |
| 15130903 | ---                                                                                      | <0.05        | -2.19201       |
| 14929299 | ---                                                                                      | <0.05        | -2.19236       |
| 15102129 | ---                                                                                      | <0.05        | -2.19241       |
| 15004637 | ---                                                                                      | <0.05        | -2.19246       |
| 15020168 | XM_001499988 // NPY1R // neuropeptide Y receptor Y1 // --- // 100061686 /// ENSECAT0000  | NPY1R        | <0.05 -2.19292 |
| 14980143 | NR_032930 // MIR365-2 // microRNA mir-365-2 // --- // 100315063                          | MIR365-2     | <0.05 -2.19465 |
| 15133511 | ---                                                                                      | <0.05        | -2.19504       |
| 14931755 | ---                                                                                      | <0.05        | -2.19573       |
| 14936568 | ---                                                                                      | <0.05        | -2.19741       |
| 14981770 | ---                                                                                      | <0.05        | -2.19875       |
| 15093558 | XM_001500300 // PDE4B // phosphodiesterase 4B, cAMP-specific // --- // 100053961 /// EN  | PDE4B        | <0.05 -2.19912 |
| 15105578 | ---                                                                                      | <0.05        | -2.19913       |
| 15136742 | ---                                                                                      | <0.05        | -2.19923       |
| 15123458 | ---                                                                                      | <0.05        | -2.19928       |
| 14929179 | ---                                                                                      | <0.05        | -2.19951       |
| 15017036 | ---                                                                                      | <0.05        | -2.19956       |
| 14963807 | ENSECAT00000000076 // LOC100056359 // meteorin-like protein-like // --- // 100056359 //  | LOC100056359 | <0.05 -2.19974 |
| 15072017 | ---                                                                                      | <0.05        | -2.1999        |
| 15112182 | XM_001917627 // LOC100147186 // olfactory receptor 52D1-like // --- // 100147186 /// EN  | LOC100147186 | <0.05 -2.20075 |
| 15088496 | ---                                                                                      | <0.05        | -2.20119       |
| 15112289 | XM_001499320 // LOC100069580 // putative olfactory receptor 52P1-like // --- // 1000695  | LOC100069580 | <0.05 -2.20183 |
| 15137368 | ---                                                                                      | <0.05        | -2.20197       |
| 15137164 | ---                                                                                      | <0.05        | -2.20388       |
| 14993111 | ---                                                                                      | <0.05        | -2.20398       |
| 15001283 | ---                                                                                      | <0.05        | -2.20417       |
| 14947729 | XM_001501951 // LOC100072089 // olfactory receptor 4K14-like // --- // 100072089 /// EN  | LOC100072089 | <0.05 -2.20423 |
| 15135978 | ---                                                                                      | <0.05        | -2.2044        |
| 14969553 | NR_032923 // MIR670 // microRNA mir-670 // --- // 100315104                              | MIR670       | <0.05 -2.20482 |
| 15137184 | ---                                                                                      | <0.05        | -2.20531       |
| 15032308 | ENSECAT000000023025 // LGSN // lengsin, lens protein with glutamine synthetase domain // | LGSN         | <0.05 -2.2056  |
| 15040376 | ---                                                                                      | <0.05        | -2.20577       |
| 15027354 | XM_001503734 // LOC100052091 // olfactory receptor 1N1-like // --- // 100052091 /// ENS  | LOC100052091 | <0.05 -2.20593 |
| 15015540 | ---                                                                                      | <0.05        | -2.20833       |
| 15006788 | ---                                                                                      | <0.05        | -2.20906       |
| 14927445 | ---                                                                                      | <0.05        | -2.2095        |
| 14981287 | XM_001497144 // LOC100067002 // glucosamine-fructose-6-phosphate aminotransferase [iso   | LOC100067002 | <0.05 -2.20969 |
| 15087351 | ---                                                                                      | <0.05        | -2.21011       |
| 14931429 | ---                                                                                      | <0.05        | -2.21071       |
| 15137052 | ---                                                                                      | <0.05        | -2.21101       |
| 15008818 | ---                                                                                      | <0.05        | -2.21224       |
| 15030482 | ENSECAT00000018981 // LOC100054813 // uncharacterized protein C6orf15-like // --- // 10  | LOC100054813 | <0.05 -2.2128  |
| 15136622 | ---                                                                                      | <0.05        | -2.21359       |
| 15008740 | ENSECAT00000019338 // LOC100147031 // primary ciliary dyskinesia protein 1-like // ---   | LOC100147031 | <0.05 -2.21446 |
| 15024933 | XM_003364473 // LOC100054505 // stathmin-4-like // --- // 100054505 /// ENSECAT00000017  | LOC100054505 | <0.05 -2.21455 |
| 14967701 | XM_001502293 // SCARF1 // scavenger receptor class F, member 1 // --- // 100072382 ///   | SCARF1       | <0.05 -2.21494 |
| 15111813 | XM_001495302 // LOC100064387 // diacylglycerol O-acyltransferase 2-like // --- // 10006  | LOC100064387 | <0.05 -2.21537 |
| 14938632 | NR_032776 // MIR1282 // microRNA mir-1282 // --- // 100314999                            | MIR1282      | <0.05 -2.21653 |
| 15033324 | ---                                                                                      | <0.05        | -2.21757       |
| 15137048 | ---                                                                                      | <0.05        | -2.21793       |

|                                                                                                  |              |  |       |          |
|--------------------------------------------------------------------------------------------------|--------------|--|-------|----------|
| 15002568 ---                                                                                     |              |  | <0.05 | -2.21912 |
| 15130574 XM_001494562 // LOC100063279 // olfactory receptor 10R2-like // --- // 100063279 /// EN | LOC100063279 |  | <0.05 | -2.21915 |
| 14931939 ---                                                                                     |              |  | <0.05 | -2.21937 |
| 15093180 ---                                                                                     |              |  | <0.05 | -2.21973 |
| 15137000 ---                                                                                     |              |  | <0.05 | -2.21973 |
| 14991409 ---                                                                                     |              |  | <0.05 | -2.21979 |
| 15040878 ENSECAT00000013888 // LOC100053354 // breast carcinoma-amplified sequence 1-like // --- | LOC100053354 |  | <0.05 | -2.21987 |
| 14926583 ---                                                                                     |              |  | <0.05 | -2.2218  |
| 14927621 ---                                                                                     |              |  | <0.05 | -2.22258 |
| 14925587 ---                                                                                     |              |  | <0.05 | -2.22259 |
| 14930591 ---                                                                                     |              |  | <0.05 | -2.22259 |
| 15039071 ---                                                                                     |              |  | <0.05 | -2.2227  |
| 15007738 ---                                                                                     |              |  | <0.05 | -2.22284 |
| 15090288 ENSECAT00000015602 // CAMK1G // calcium/calmodulin-dependent protein kinase 1G // --- / | CAMK1G       |  | <0.05 | -2.22529 |
| 14939556 XM_001502449 // LOC100072499 // olfactory receptor 11G2-like // --- // 100072499 /// EN | LOC100072499 |  | <0.05 | -2.22796 |
| 15090447 ENSECAT00000016862 // LOC100058208 // uncharacterized protein C1orf226-like // --- // 1 | LOC100058208 |  | <0.05 | -2.22877 |
| 15083634 ENSECAT00000008396 // CRYGN // crystallin, gamma N // --- // ---                        | CRYGN        |  | <0.05 | -2.22929 |
| 14973720 ---                                                                                     |              |  | <0.05 | -2.23004 |
| 14927435 ---                                                                                     |              |  | <0.05 | -2.23195 |
| 14972584 XM_001488616 // LOC100053284 // olfactory receptor 4P4-like // --- // 100053284 /// ENS | LOC100053284 |  | <0.05 | -2.2333  |
| 14986942 ---                                                                                     |              |  | <0.05 | -2.23469 |
| 15090236 ---                                                                                     |              |  | <0.05 | -2.23507 |
| 15003570 ---                                                                                     |              |  | <0.05 | -2.23555 |
| 15010680 ---                                                                                     |              |  | <0.05 | -2.23625 |
| 14926415 ---                                                                                     |              |  | <0.05 | -2.23674 |
| 14939505 XM_001918267 // LOC100072107 // olfactory receptor 4L1-like // --- // 100072107 /// ENS | LOC100072107 |  | <0.05 | -2.23751 |
| 14927911 ---                                                                                     |              |  | <0.05 | -2.23785 |
| 15048207 ---                                                                                     |              |  | <0.05 | -2.23842 |
| 14994336 ---                                                                                     |              |  | <0.05 | -2.23905 |
| 14930957 ---                                                                                     |              |  | <0.05 | -2.23972 |
| 14930929 ---                                                                                     |              |  | <0.05 | -2.2398  |
| 15094377 ENSECAT00000006785 // LOC100061005 // potassium voltage-gated channel subfamily E membe | LOC100061005 |  | <0.05 | -2.23993 |
| 14936801 ---                                                                                     |              |  | <0.05 | -2.24103 |
| 14997111 ENSECAT00000027151 // CDCP1 // CUB domain containing protein 1 // --- // 100065703 ///  | CDCP1        |  | <0.05 | -2.24254 |
| 15118666 ---                                                                                     |              |  | <0.05 | -2.24269 |
| 15015246 ENSECAT00000011123 // HHLA2 // HERV-H LTR-associating 2 // --- // ---                   | HHLA2        |  | <0.05 | -2.2436  |
| 15047661 ---                                                                                     |              |  | <0.05 | -2.24532 |
| 15014454 ---                                                                                     |              |  | <0.05 | -2.24657 |
| 15125938 XM_001499571 // LOC100065839 // claudin-6-like // --- // 100065839 /// ENSECAT000000037 | LOC100065839 |  | <0.05 | -2.24657 |
| 14928887 ---                                                                                     |              |  | <0.05 | -2.24719 |
| 15133003 ---                                                                                     |              |  | <0.05 | -2.24738 |
| 15113559 NR_032877 // MIR130B // microRNA mir-130b // --- // 100314829                           | MIR130B      |  | <0.05 | -2.24747 |
| 14975469 ENSECAT00000024168 // LOC100630602 // c-C motif chemokine 26-like // --- // 100630602 / | LOC100630602 |  | <0.05 | -2.24764 |
| 15020195 ---                                                                                     |              |  | <0.05 | -2.24924 |
| 15121886 ENSECAT00000025690 // LOC100060072 // uncharacterized protein C8orf47-like // --- // 10 | LOC100060072 |  | <0.05 | -2.25113 |
| 14997796 XM_001496182 // ANKRD28 // ankyrin repeat domain 28 // --- // 100052418 /// ENSECAT0000 | ANKRD28      |  | <0.05 | -2.25115 |
| 15109309 ---                                                                                     |              |  | <0.05 | -2.25128 |
| 14926843 ---                                                                                     |              |  | <0.05 | -2.25158 |
| 14961651 ---                                                                                     |              |  | <0.05 | -2.25213 |
| 14942247 ENSECAT00000015611 // SCD // stearyl-CoA desaturase (delta-9-desaturase) // --- // 100  | SCD          |  | <0.05 | -2.25238 |
| 14928973 ---                                                                                     |              |  | <0.05 | -2.2531  |
| 15105255 XM_001501884 // LOC100072027 // olfactory receptor 8G2-like // --- // 100072027 /// ENS | LOC100072027 |  | <0.05 | -2.2537  |
| 15032472 XM_001499511 // LOC100069781 // olfactory receptor 1F1-like // --- // 100069781 /// ENS | LOC100069781 |  | <0.05 | -2.25829 |
| 15067810 ---                                                                                     |              |  | <0.05 | -2.25861 |
| 15056190 ---                                                                                     |              |  | <0.05 | -2.25961 |
| 15136746 ---                                                                                     |              |  | <0.05 | -2.25961 |
| 14930263 ---                                                                                     |              |  | <0.05 | -2.26051 |
| 15062751 NM_001081908 // AKR1C1 // aldo-keto reductase family 1, member C1 // --- // 100034073 / | AKR1C1       |  | <0.05 | -2.26074 |
| 14925599 ---                                                                                     |              |  | <0.05 | -2.2608  |
| 14930603 ---                                                                                     |              |  | <0.05 | -2.2608  |
| 14952411 ENSECAT00000020664 // LOC100629691 // uncharacterized protein C6orf163-like // --- // 1 | LOC100629691 |  | <0.05 | -2.26236 |
| 14990938 XM_001918082 // LOC100146419 // RAD51-associated protein 2-like // --- // 100146419 /// | LOC100146419 |  | <0.05 | -2.26254 |
| 14935840 XM_001497959 // LOC100068061 // hepatoma-derived growth factor-related protein 3-like / | LOC100068061 |  | <0.05 | -2.26264 |
| 15057679 ---                                                                                     |              |  | <0.05 | -2.26417 |
| 15127690 ---                                                                                     |              |  | <0.05 | -2.26528 |
| 15123982 ---                                                                                     |              |  | <0.05 | -2.26547 |
| 14925729 ---                                                                                     |              |  | <0.05 | -2.26585 |
| 14930001 ---                                                                                     |              |  | <0.05 | -2.26619 |
| 14997427 ENSECAT00000021523 // LOC100054924 // serine/threonine-protein kinase DCLK3-like // --- | LOC100054924 |  | <0.05 | -2.2667  |
| 15043749 XM_003363960 // LOC100629885 // interferon alpha-2-like // --- // 100629885 /// ENSECAT | LOC100629885 |  | <0.05 | -2.26809 |
| 15102171 XM_001494579 // LOC100063302 // keratin, type II cytoskeletal 1-like // --- // 10006330 | LOC100063302 |  | <0.05 | -2.26966 |
| 14931383 ---                                                                                     |              |  | <0.05 | -2.27123 |
| 15112114 XM_001500854 // LOC100053374 // putative RNA polymerase II subunit A C-terminal domain  | LOC100053374 |  | <0.05 | -2.27285 |
| 15136342 ---                                                                                     |              |  | <0.05 | -2.27277 |
| 15134534 ---                                                                                     |              |  | <0.05 | -2.27312 |
| 14988502 XM_001495750 // LOC100065031 // interleukin-1 family member 9-like // --- // 100065031  | LOC100065031 |  | <0.05 | -2.27341 |
| 15039487 NM_001091537 // PRND // prion protein 2 (duplet) // --- // 100048937 /// ENSECAT0000000 | PRND         |  | <0.05 | -2.27356 |
| 14984183 ---                                                                                     |              |  | <0.05 | -2.27492 |
| 15120701 ---                                                                                     |              |  | <0.05 | -2.27525 |
| 14925625 ---                                                                                     |              |  | <0.05 | -2.27561 |
| 15030159 XM_001496061 // LOC100065498 // olfactory receptor 2M2-like // --- // 100065498 /// ENS | LOC100065498 |  | <0.05 | -2.27576 |
| 14982483 ---                                                                                     |              |  | <0.05 | -2.27846 |
| 15098850 ---                                                                                     |              |  | <0.05 | -2.27989 |
| 14934384 ---                                                                                     |              |  | <0.05 | -2.28018 |
| 14989296 ---                                                                                     |              |  | <0.05 | -2.28085 |
| 14966148 NR_032903 // MIR196A // microRNA mir-196a // --- // 100314843                           | MIR196A      |  | <0.05 | -2.28094 |
| 15048241 ---                                                                                     |              |  | <0.05 | -2.28112 |
| 15137080 ---                                                                                     |              |  | <0.05 | -2.28156 |
| 15011487 ---                                                                                     |              |  | <0.05 | -2.28232 |
| 14991538 ENSECAT00000000377 // IL-1RII // interleukin-1 receptor type II // --- // 100033831 /// | IL-1RII      |  | <0.05 | -2.28279 |
| 15001479 XM_001494115 // RARB // retinoic acid receptor, beta // --- // 100051546 /// ENSECAT000 | RARB         |  | <0.05 | -2.28315 |
| 15026776 ---                                                                                     |              |  | <0.05 | -2.2834  |
| 14950897 XM_001488567 // LOC100053135 // epididymal sperm-binding protein 1-like // --- // 10005 | LOC100053135 |  | <0.05 | -2.28345 |
| 15024667 NR_032796 // MIR200B // microRNA mir-200b // --- // 100315038                           | MIR200B      |  | <0.05 | -2.28367 |
| 15126455 ---                                                                                     |              |  | <0.05 | -2.28371 |
| 14931055 ---                                                                                     |              |  | <0.05 | -2.28542 |
| 14994632 ENSECAT00000014191 // DCDC2C // doublecortin domain containing 2C // --- // ---         | DCDC2C       |  | <0.05 | -2.28664 |
| 15056574 GQ259798 // DEFA35L // Paneth cell-specific alpha-defensin 35L // --- // 100307022 ///  | DEFA35L      |  | <0.05 | -2.28773 |
| 14932303 ---                                                                                     |              |  | <0.05 | -2.28819 |
| 15093784 ---                                                                                     |              |  | <0.05 | -2.28848 |
| 14930455 ---                                                                                     |              |  | <0.05 | -2.28854 |
| 14954885 ---                                                                                     |              |  | <0.05 | -2.28963 |
| 15091426 ENSECAT00000017022 // LOC100061178 // cornifin-B-like // --- // 100061178 /// XM_001916 | LOC100061178 |  | <0.05 | -2.29013 |
| 14931169 ---                                                                                     |              |  | <0.05 | -2.29063 |
| 15116069 ---                                                                                     |              |  | <0.05 | -2.29152 |
| 15126654 ---                                                                                     |              |  | <0.05 | -2.29168 |

|                                                                                                  |              |  |       |          |
|--------------------------------------------------------------------------------------------------|--------------|--|-------|----------|
| 14934256 ---                                                                                     |              |  | <0.05 | -2.29206 |
| 15110843 ENSECAT00000014881 // LOC100064480 // zinc finger protein 709-like // --- // 100064480  | LOC100064480 |  | <0.05 | -2.29462 |
| 14970590 ---                                                                                     |              |  | <0.05 | -2.29479 |
| 15136818 ---                                                                                     |              |  | <0.05 | -2.29574 |
| 15006107 ---                                                                                     |              |  | <0.05 | -2.29882 |
| 15127446 ---                                                                                     |              |  | <0.05 | -2.29884 |
| 14970011 XM_001497002 // LOC100066827 // olfactory receptor 5AK2-like // --- // 100066827 /// EN | LOC100066827 |  | <0.05 | -2.29929 |
| 15048972 ENSECAT00000017958 // LOC100062681 // cylicin-2-like // --- // 100062681 /// XM_0014941 | LOC100062681 |  | <0.05 | -2.29975 |
| 15008384 ---                                                                                     |              |  | <0.05 | -2.29993 |
| 15125592 ---                                                                                     |              |  | <0.05 | -2.30087 |
| 14925117 ---                                                                                     |              |  | <0.05 | -2.30105 |
| 15130250 ENSECAT00000021951 // LOC100069284 // high mobility group protein B3-like // --- // 100 | LOC100069284 |  | <0.05 | -2.30159 |
| 15079475 ENSECAT00000016877 // LOC100055297 // anionic trypsin-like // --- // 100055297 XM_0     | LOC100055297 |  | <0.05 | -2.30553 |
| 14982654 ---                                                                                     |              |  | <0.05 | -2.30573 |
| 15085890 XM_001915440 // LOC100146177 // olfactory receptor 10K2-like // --- // 100146177 /// EN | LOC100146177 |  | <0.05 | -2.30666 |
| 14939486 XM_001501852 // LOC100072004 // olfactory receptor 4K17-like // --- // 100072004 /// EN | LOC100072004 |  | <0.05 | -2.30774 |
| 15137540 ---                                                                                     |              |  | <0.05 | -2.30796 |
| 14981828 ---                                                                                     |              |  | <0.05 | -2.30819 |
| 15007741 ---                                                                                     |              |  | <0.05 | -2.30951 |
| 14982669 ENSECAT00000013882 // NRG2 // neuregulin 2 // --- // ---                                | NRG2         |  | <0.05 | -2.31011 |
| 15097454 XM_001489041 // LOC100054306 // olfactory receptor 6C4-like // --- // 100054306 /// ENS | LOC100054306 |  | <0.05 | -2.31078 |
| 14935048 ---                                                                                     |              |  | <0.05 | -2.31093 |
| 14925499 ---                                                                                     |              |  | <0.05 | -2.31104 |
| 15115622 ---                                                                                     |              |  | <0.05 | -2.31164 |
| 15122140 ---                                                                                     |              |  | <0.05 | -2.31239 |
| 15039844 ---                                                                                     |              |  | <0.05 | -2.31424 |
| 15103454 XM_001493821 // LOC100059768 // growth arrest and DNA damage-inducible protein GADD45 b | LOC100059768 |  | <0.05 | -2.31558 |
| 15057269 ---                                                                                     |              |  | <0.05 | -2.31564 |
| 15045046 XM_001489156 // PCNX // pecanex homolog (Drosophila) // --- // 100054565 /// ENSECAT000 | PCNX         |  | <0.05 | -2.31611 |
| 15105518 ENSECAT00000023734 // APLP2 // amyloid beta (A4) precursor-like protein 2 // --- // 100 | APLP2        |  | <0.05 | -2.31819 |
| 14949236 ---                                                                                     |              |  | <0.05 | -2.31924 |
| 14961653 ENSECAT00000027009 // LOC100071483 // uncharacterized protein C17orf78 homolog // --- / | LOC100071483 |  | <0.05 | -2.31941 |
| 15063849 ---                                                                                     |              |  | <0.05 | -2.31977 |
| 14943785 ---                                                                                     |              |  | <0.05 | -2.31986 |
| 14926755 ---                                                                                     |              |  | <0.05 | -2.32152 |
| 15110163 XM_001501616 // LOC100071761 // olfactory receptor 6M1-like // --- // 100071761 /// ENS | LOC100071761 |  | <0.05 | -2.32169 |
| 15136792 ---                                                                                     |              |  | <0.05 | -2.32195 |
| 15016197 ---                                                                                     |              |  | <0.05 | -2.3225  |
| 15034398 XM_001493989 // LOC100062413 // olfactory receptor 7A17-like // --- // 100062413 /// EN | LOC100062413 |  | <0.05 | -2.32376 |
| 14929427 ---                                                                                     |              |  | <0.05 | -2.32535 |
| 15007657 XM_001917556 // ZNF804A // zinc finger protein 804A // --- // 100054190 /// ENSECAT0000 | ZNF804A      |  | <0.05 | -2.32727 |
| 14930649 ---                                                                                     |              |  | <0.05 | -2.32879 |
| 14977278 XM_003362763 // LOC100069286 // pyrin-like // --- // 100069286 /// ENSECAT00000006974 / | LOC100069286 |  | <0.05 | -2.33089 |
| 14926315 ---                                                                                     |              |  | <0.05 | -2.33159 |
| 15079527 ENSECAT00000003584 // LOC100056093 // transmembrane protein 139-like // --- // 10005609 | LOC100056093 |  | <0.05 | -2.33185 |
| 14927229 ---                                                                                     |              |  | <0.05 | -2.33274 |
| 15023913 ENSECAT00000005694 // LOC100050750 // transmembrane protein 51-like // --- // 100050750 | LOC100050750 |  | <0.05 | -2.333   |
| 15136700 ---                                                                                     |              |  | <0.05 | -2.33301 |
| 15055290 ---                                                                                     |              |  | <0.05 | -2.33422 |
| 14950893 NM_001193462 // SULT2A1 // sulfotransferase family, cytosolic, 2A, dehydroepiandroster  | SULT2A1      |  | <0.05 | -2.33452 |
| 15131122 ---                                                                                     |              |  | <0.05 | -2.33465 |
| 15027185 ---                                                                                     |              |  | <0.05 | -2.33507 |
| 15082034 NR_032823 // MIR196B // microRNA mir-196b // --- // 100315100                           | MIR196B      |  | <0.05 | -2.33559 |
| 14929433 ---                                                                                     |              |  | <0.05 | -2.33571 |
| 14998872 ---                                                                                     |              |  | <0.05 | -2.33717 |
| 15046134 ---                                                                                     |              |  | <0.05 | -2.33738 |
| 15068091 ENSECAT00000015583 // LOC100069539 // cytokine-dependent hematopoietic cell linker-like | LOC100069539 |  | <0.05 | -2.33852 |
| 15086644 XM_001493530 // LOC100061663 // protein S100-A9-like // --- // 100061663 /// ENSECAT000 | LOC100061663 |  | <0.05 | -2.33919 |
| 15043499 ---                                                                                     |              |  | <0.05 | -2.34041 |
| 14991769 ---                                                                                     |              |  | <0.05 | -2.34055 |
| 15132009 ---                                                                                     |              |  | <0.05 | -2.34086 |
| 14928005 ---                                                                                     |              |  | <0.05 | -2.34142 |
| 14927989 ---                                                                                     |              |  | <0.05 | -2.34581 |
| 14956669 ---                                                                                     |              |  | <0.05 | -2.34608 |
| 15128319 ---                                                                                     |              |  | <0.05 | -2.34666 |
| 15097702 ENSECAT00000023772 // IL23A // interleukin 23, alpha subunit p19 // --- // 100034230 // | IL23A        |  | <0.05 | -2.34864 |
| 15093701 ---                                                                                     |              |  | <0.05 | -2.34999 |
| 15129283 ---                                                                                     |              |  | <0.05 | -2.35016 |
| 15020279 ---                                                                                     |              |  | <0.05 | -2.35147 |
| 15134584 ---                                                                                     |              |  | <0.05 | -2.35304 |
| 14925339 ---                                                                                     |              |  | <0.05 | -2.35565 |
| 14947779 XM_001502402 // LOC100072469 // olfactory receptor 4K2-like // --- // 100072469 /// ENS | LOC100072469 |  | <0.05 | -2.35613 |
| 14932548 ---                                                                                     |              |  | <0.05 | -2.35613 |
| 15120831 ---                                                                                     |              |  | <0.05 | -2.35621 |
| 14926627 ---                                                                                     |              |  | <0.05 | -2.35651 |
| 15110353 ENSECAT00000018456 // CDON // Cdon homolog (mouse) // --- // 100064474 /// ENSECAT00000 | CDON         |  | <0.05 | -2.35741 |
| 14926773 ---                                                                                     |              |  | <0.05 | -2.35883 |
| 14931481 ---                                                                                     |              |  | <0.05 | -2.36007 |
| 15065410 ---                                                                                     |              |  | <0.05 | -2.3618  |
| 14961330 XM_001500567 // LOC100070889 // olfactory receptor 4D2-like // --- // 100070889 /// ENS | LOC100070889 |  | <0.05 | -2.36344 |
| 15100780 ---                                                                                     |              |  | <0.05 | -2.36517 |
| 15128835 ---                                                                                     |              |  | <0.05 | -2.3655  |
| 15120505 ---                                                                                     |              |  | <0.05 | -2.3656  |
| 14978879 ---                                                                                     |              |  | <0.05 | -2.36669 |
| 15116646 NR_032876 // MIR122 // microRNA mir-122 // --- // 100315102                             | MIR122       |  | <0.05 | -2.36729 |
| 14931891 ---                                                                                     |              |  | <0.05 | -2.37098 |
| 15071545 ENSECAT00000020434 // PDGFRA // platelet-derived growth factor receptor, alpha polypept | PDGFRA       |  | <0.05 | -2.37129 |
| 15136694 ---                                                                                     |              |  | <0.05 | -2.37171 |
| 14997862 ENSECAT00000026805 // SH3BP5 // SH3-domain binding protein 5 (BTK-associated) // --- // | SH3BP5       |  | <0.05 | -2.37375 |
| 15108307 ENSECAT00000020310 // FSHB // follicle stimulating hormone, beta polypeptide // --- //  | FSHB         |  | <0.05 | -2.37434 |
| 15102491 XM_001490066 // LOC100056234 // olfactory receptor 6C76-like // --- // 100056234 /// EN | LOC100056234 |  | <0.05 | -2.37785 |
| 14925923 ---                                                                                     |              |  | <0.05 | -2.37796 |
| 15027870 ---                                                                                     |              |  | <0.05 | -2.37836 |
| 14927153 ---                                                                                     |              |  | <0.05 | -2.37858 |
| 14966403 ENSECAT00000023232 // LOC100070690 // uncharacterized protein C17orf67 homolog // --- / | LOC100070690 |  | <0.05 | -2.37912 |
| 15111490 ---                                                                                     |              |  | <0.05 | -2.37943 |
| 14931353 ---                                                                                     |              |  | <0.05 | -2.38005 |
| 14927447 ---                                                                                     |              |  | <0.05 | -2.38073 |
| 15136186 ---                                                                                     |              |  | <0.05 | -2.38253 |
| 15108925 ---                                                                                     |              |  | <0.05 | -2.3834  |
| 15136208 ---                                                                                     |              |  | <0.05 | -2.38613 |
| 14931363 ---                                                                                     |              |  | <0.05 | -2.38854 |
| 14989256 ENSECAT00000009642 // LOC100061844 // CB1 cannabinoid receptor-interacting protein 1-li | LOC100061844 |  | <0.05 | -2.38911 |
| 15029742 ENSECAT00000008298 // C6orf52 // chromosome 6 open reading frame 52 // --- // ---       | C6orf52      |  | <0.05 | -2.38925 |
| 15137664 ---                                                                                     |              |  | <0.05 | -2.39127 |
| 14928337 ---                                                                                     |              |  | <0.05 | -2.39497 |

|          |                    |                                                                          |     |                                            |              |                 |
|----------|--------------------|--------------------------------------------------------------------------|-----|--------------------------------------------|--------------|-----------------|
| 14928425 | ---                |                                                                          |     |                                            | <-0.05       | -2.39497        |
| 15113302 | ---                |                                                                          |     |                                            | <-0.05       | -2.39637        |
| 15049505 | XM_001501205       | // LOC100071445 // olfactory receptor 1G1-like                           | --- | // 100071445 // ENS                        | LOC100071445 | <-0.05 -2.39644 |
| 15072009 | ---                |                                                                          |     |                                            | <-0.05       | -2.39698        |
| 15025214 | ---                |                                                                          |     |                                            | <-0.05       | -2.39784        |
| 14925821 | ---                |                                                                          |     |                                            | <-0.05       | -2.39983        |
| 14925851 | ---                |                                                                          |     |                                            | <-0.05       | -2.39983        |
| 14925893 | ---                |                                                                          |     |                                            | <-0.05       | -2.39983        |
| 14925965 | ---                |                                                                          |     |                                            | <-0.05       | -2.39983        |
| 15013947 | ---                |                                                                          |     |                                            | <-0.05       | -2.40129        |
| 15010599 | ---                |                                                                          |     |                                            | <-0.05       | -2.40175        |
| 15078871 | ENSECAT00000019550 | // LOC100057093 // uncharacterized protein C7orf45 homolog               | --- | //                                         | LOC100057093 | <-0.05 -2.40211 |
| 14929773 | ---                |                                                                          |     |                                            | <-0.05       | -2.40252        |
| 15003423 | ---                |                                                                          |     |                                            | <-0.05       | -2.40494        |
| 14926103 | ---                |                                                                          |     |                                            | <-0.05       | -2.4057         |
| 15137004 | ---                |                                                                          |     |                                            | <-0.05       | -2.40923        |
| 14944245 | XM_001493698       | // LOC100061933 // olfactory receptor 6C4-like                           | --- | // 100061933 // ENS                        | LOC100061933 | <-0.05 -2.40961 |
| 14929951 | ---                |                                                                          |     |                                            | <-0.05       | -2.41249        |
| 15107307 | ---                |                                                                          |     |                                            | <-0.05       | -2.4146         |
| 15137410 | ---                |                                                                          |     |                                            | <-0.05       | -2.41677        |
| 15058153 | ---                |                                                                          |     |                                            | <-0.05       | -2.41702        |
| 15085901 | ENSECAT00000025464 | // LOC100054450 // CD5 antigen-like                                      | --- | // 100054450 // XM_00148                   | LOC100054450 | <-0.05 -2.41868 |
| 14970530 | ---                |                                                                          |     |                                            | <-0.05       | -2.42003        |
| 15016746 | ---                |                                                                          |     |                                            | <-0.05       | -2.42022        |
| 15002592 | ---                |                                                                          |     |                                            | <-0.05       | -2.42048        |
| 14927993 | ---                |                                                                          |     |                                            | <-0.05       | -2.422          |
| 15099749 | ---                |                                                                          |     |                                            | <-0.05       | -2.42203        |
| 15076010 | ---                |                                                                          |     |                                            | <-0.05       | -2.42232        |
| 14967870 | XM_001502636       | // LOC100072630 // olfactory receptor 3A2-like                           | --- | // 100072630 // ENS                        | LOC100072630 | <-0.05 -2.42247 |
| 15120578 | XM_001490831       | // LOC100057505 // serpin B4-like                                        | --- | // 100057505 // ENSECAT000000227           | LOC100057505 | <-0.05 -2.4228  |
| 15003530 | ---                |                                                                          |     |                                            | <-0.05       | -2.42413        |
| 14925351 | ---                |                                                                          |     |                                            | <-0.05       | -2.42415        |
| 15054923 | AF541975           | // ADAMTS1 // ADAM metalloproteinase with thrombospondin type 1 motif, 1 | --- | //                                         | ADAMTS1      | <-0.05 -2.42455 |
| 15136212 | ---                |                                                                          |     |                                            | <-0.05       | -2.42489        |
| 14926817 | ---                |                                                                          |     |                                            | <-0.05       | -2.42882        |
| 14946819 | ---                |                                                                          |     |                                            | <-0.05       | -2.43032        |
| 15026827 | ENSECAT00000015816 | // PHACTR1 // phosphatase and actin regulator 1                          | --- | // 100051555                               | PHACTR1      | <-0.05 -2.43301 |
| 15096793 | XM_001491393       | // LOC100058417 // olfactory receptor 8S1-like                           | --- | // 100058417 // ENS                        | LOC100058417 | <-0.05 -2.43312 |
| 15062453 | ---                |                                                                          |     |                                            | <-0.05       | -2.4361         |
| 15083389 | XM_001490410       | // LOC100056816 // olfactory receptor 2F1-like                           | --- | // 100056816 // ENS                        | LOC100056816 | <-0.05 -2.43653 |
| 14943795 | ---                |                                                                          |     |                                            | <-0.05       | -2.43975        |
| 15057447 | ---                |                                                                          |     |                                            | <-0.05       | -2.44065        |
| 14931771 | ---                |                                                                          |     |                                            | <-0.05       | -2.44085        |
| 14926449 | ---                |                                                                          |     |                                            | <-0.05       | -2.44171        |
| 15077218 | ---                |                                                                          |     |                                            | <-0.05       | -2.4418         |
| 15074480 | ---                |                                                                          |     |                                            | <-0.05       | -2.442          |
| 15060014 | ---                |                                                                          |     |                                            | <-0.05       | -2.44221        |
| 15136164 | ---                |                                                                          |     |                                            | <-0.05       | -2.44322        |
| 15065561 | NM_001109812       | // CDH13 // cadherin 13, H-cadherin (heart)                              | --- | // 100055760 // ENSECA                     | CDH13        | <-0.05 -2.44327 |
| 15085386 | NR_032844          | // MIR29B-2 // microRNA mir-29b-2                                        | --- | // 100315047                               | MIR29B-2     | <-0.05 -2.44422 |
| 14993776 | ---                |                                                                          |     |                                            | <-0.05       | -2.44489        |
| 15131182 | ---                |                                                                          |     |                                            | <-0.05       | -2.44546        |
| 15098375 | ---                |                                                                          |     |                                            | <-0.05       | -2.44725        |
| 15049479 | XM_001501396       | // LOC100071600 // olfactory receptor 1J2-like                           | --- | // 100071600 // ENS                        | LOC100071600 | <-0.05 -2.44745 |
| 14926221 | ---                |                                                                          |     |                                            | <-0.05       | -2.44964        |
| 15080568 | XM_001491909       | // PNPLA8 // patatin-like phospholipase domain containing 8              | --- | // 1000                                    | PNPLA8       | <-0.05 -2.45185 |
| 14962729 | ---                |                                                                          |     |                                            | <-0.05       | -2.45185        |
| 14981211 | ---                |                                                                          |     |                                            | <-0.05       | -2.45193        |
| 14992499 | XM_001491488       | // LOC100058571 // probable N-acetyltransferase 8B-like                  | --- | // 10005857                                | LOC100058571 | <-0.05 -2.45394 |
| 15134642 | ---                |                                                                          |     |                                            | <-0.05       | -2.45529        |
| 15089660 | ---                |                                                                          |     |                                            | <-0.05       | -2.45587        |
| 14929085 | ---                |                                                                          |     |                                            | <-0.05       | -2.45606        |
| 14933804 | ---                |                                                                          |     |                                            | <-0.05       | -2.45617        |
| 15063348 | ENSECAT00000009357 | // LOC100068038 // ADP-ribosylation factor-like protein 5B-like          | --- | //                                         | LOC100068038 | <-0.05 -2.4567  |
| 14929657 | ---                |                                                                          |     |                                            | <-0.05       | -2.4568         |
| 14969995 | ---                |                                                                          |     |                                            | <-0.05       | -2.45838        |
| 15135982 | ---                |                                                                          |     |                                            | <-0.05       | -2.45863        |
| 15082316 | ---                |                                                                          |     |                                            | <-0.05       | -2.45914        |
| 14926727 | ---                |                                                                          |     |                                            | <-0.05       | -2.46016        |
| 15082025 | XM_001499476       | // HOXA6 // homeobox A6                                                  | --- | // 100054438 // ENSECAT00000000495 // HOXA | HOXA6        | <-0.05 -2.4609  |
| 15137190 | ---                |                                                                          |     |                                            | <-0.05       | -2.46112        |
| 15097448 | ---                |                                                                          |     |                                            | <-0.05       | -2.46174        |
| 14927183 | ---                |                                                                          |     |                                            | <-0.05       | -2.46318        |
| 14935447 | XM_001493617       | // LOC100061806 // olfactory receptor 6S1-like                           | --- | // 100061806 // ENS                        | LOC100061806 | <-0.05 -2.46376 |
| 15042813 | ENSECAT00000018097 | // LOC100052947 // protein FAM75D1-like                                  | --- | // 100052947 // XM_0                       | LOC100052947 | <-0.05 -2.46422 |
| 14985881 | ---                |                                                                          |     |                                            | <-0.05       | -2.46428        |
| 15083298 | ENSECAT00000022470 | // LOC100050047 // cationic trypsin-3-like                               | --- | // 100050047 // X                          | LOC100050047 | <-0.05 -2.46431 |
| 15091419 | XM_003365022       | // LOC100630233 // uncharacterized LOC100630233                          | --- | // 100630233 // EN                         | LOC100630233 | <-0.05 -2.46485 |
| 14930629 | ---                |                                                                          |     |                                            | <-0.05       | -2.46599        |
| 15130168 | ---                |                                                                          |     |                                            | <-0.05       | -2.46696        |
| 14925567 | ---                |                                                                          |     |                                            | <-0.05       | -2.46778        |
| 14930571 | ---                |                                                                          |     |                                            | <-0.05       | -2.46778        |
| 14930237 | ---                |                                                                          |     |                                            | <-0.05       | -2.46788        |
| 14993012 | NR_032944          | // MIR1461 // microRNA mir-1461                                          | --- | // 100315016 // NR_032946 // MIR216B       | MIR1461      | <-0.05 -2.46815 |
| 14930179 | ---                |                                                                          |     |                                            | <-0.05       | -2.46881        |
| 14988258 | ---                |                                                                          |     |                                            | <-0.05       | -2.47081        |
| 14966184 | ---                |                                                                          |     |                                            | <-0.05       | -2.47091        |
| 15091451 | XM_003365028       | // LOC100630664 // Rlla domain-containing protein 1-like                 | --- | // 1006306                                 | LOC100630664 | <-0.05 -2.47106 |
| 14926841 | ---                |                                                                          |     |                                            | <-0.05       | -2.47314        |
| 15090174 | ---                |                                                                          |     |                                            | <-0.05       | -2.47336        |
| 15136456 | ---                |                                                                          |     |                                            | <-0.05       | -2.47404        |
| 15105676 | ---                |                                                                          |     |                                            | <-0.05       | -2.47471        |
| 14991443 | ---                |                                                                          |     |                                            | <-0.05       | -2.47476        |
| 15136196 | ---                |                                                                          |     |                                            | <-0.05       | -2.47476        |
| 15046683 | ---                |                                                                          |     |                                            | <-0.05       | -2.4776         |
| 15071236 | NM_001081884       | // CSN3 // casein kappa                                                  | --- | // 100033983 // ENSECAT0000001652 // CSN3  | CSN3         | <-0.05 -2.47784 |
| 14937805 | ---                |                                                                          |     |                                            | <-0.05       | -2.48279        |
| 15128959 | ---                |                                                                          |     |                                            | <-0.05       | -2.48543        |
| 14926383 | ---                |                                                                          |     |                                            | <-0.05       | -2.48785        |
| 15128441 | ---                |                                                                          |     |                                            | <-0.05       | -2.48831        |
| 14950232 | ---                |                                                                          |     |                                            | <-0.05       | -2.48846        |
| 14966036 | ---                |                                                                          |     |                                            | <-0.05       | -2.48909        |
| 14927487 | ---                |                                                                          |     |                                            | <-0.05       | -2.49015        |
| 15137360 | ---                |                                                                          |     |                                            | <-0.05       | -2.49061        |
| 14953119 | ENSECAT00000021434 | // RSPO3 // R-spondin 3                                                  | --- | // 100067377 // NM_001109682 // RSPO       | RSPO3        | <-0.05 -2.49061 |
| 14952671 | ---                |                                                                          |     |                                            | <-0.05       | -2.49098        |

|                                                                                                   |              |       |          |
|---------------------------------------------------------------------------------------------------|--------------|-------|----------|
| 15029932 ---                                                                                      |              | <0.05 | -2.49122 |
| 15095349 ---                                                                                      |              | <0.05 | -2.49317 |
| 14957439 ---                                                                                      |              | <0.05 | -2.49425 |
| 14941806 ---                                                                                      |              | <0.05 | -2.49481 |
| 15079350 ---                                                                                      |              | <0.05 | -2.495   |
| 15125808 XM_001917039 // LOC100146654 // immunoglobulin lambda-like polypeptide 5-like // --- //  | LOC100146654 | <0.05 | -2.49543 |
| 15026746 ---                                                                                      |              | <0.05 | -2.49724 |
| 14930731 ---                                                                                      |              | <0.05 | -2.4979  |
| 14968833 NR_015344 // MYH4 // myosin, heavy chain 4, skeletal muscle pseudogene // --- // 100062  | MYH4         | <0.05 | -2.49845 |
| 15101066 ---                                                                                      |              | <0.05 | -2.49854 |
| 15002547 ---                                                                                      |              | <0.05 | -2.50194 |
| 14928957 ---                                                                                      |              | <0.05 | -2.50716 |
| 15002234 XM_001491224 // LOC100050742 // transmembrane 4 L6 family member 1-like // --- // 10005  | LOC100050742 | <0.05 | -2.50775 |
| 15137106 ---                                                                                      |              | <0.05 | -2.50838 |
| 14996191 ---                                                                                      |              | <0.05 | -2.50912 |
| 14983534 ---                                                                                      |              | <0.05 | -2.51041 |
| 15119496 ---                                                                                      |              | <0.05 | -2.51079 |
| 15137752 ---                                                                                      |              | <0.05 | -2.5122  |
| 14939964 ---                                                                                      |              | <0.05 | -2.51411 |
| 14926419 ---                                                                                      |              | <0.05 | -2.51553 |
| 14928071 ---                                                                                      |              | <0.05 | -2.51658 |
| 14999271 ---                                                                                      |              | <0.05 | -2.51659 |
| 14952041 ---                                                                                      |              | <0.05 | -2.51984 |
| 14991548 ENSECAT0000009189 // LOC100058919 // mitogen-activated protein kinase kinase kinase ki   | LOC100058919 | <0.05 | -2.52044 |
| 14927061 ---                                                                                      |              | <0.05 | -2.52046 |
| 14988315 ---                                                                                      |              | <0.05 | -2.52055 |
| 15079357 ---                                                                                      |              | <0.05 | -2.52121 |
| 14965572 XM_001496268 // LOC100065767 // membrane primary amine oxidase-like // --- // 100065767  | LOC100065767 | <0.05 | -2.52166 |
| 15121226 ---                                                                                      |              | <0.05 | -2.52337 |
| 15035314 ---                                                                                      |              | <0.05 | -2.52425 |
| 14929367 ---                                                                                      |              | <0.05 | -2.52627 |
| 15043755 NR_032994 // MIR31 // microRNA mir-31 // --- // 100315075                                | MIR31        | <0.05 | -2.52966 |
| 14926905 ---                                                                                      |              | <0.05 | -2.53194 |
| 14927199 ---                                                                                      |              | <0.05 | -2.53223 |
| 15043815 ENSECAT00000022313 // C9orf11 // chromosome 9 open reading frame 11 // --- // ---        | C9orf11      | <0.05 | -2.53292 |
| 14932229 ---                                                                                      |              | <0.05 | -2.53408 |
| 15076314 ---                                                                                      |              | <0.05 | -2.5358  |
| 14931273 ---                                                                                      |              | <0.05 | -2.53588 |
| 14928539 ---                                                                                      |              | <0.05 | -2.5378  |
| 15074744 ---                                                                                      |              | <0.05 | -2.53783 |
| 14985592 ENSECAT00000004848 // PCDHB10 // protocadherin beta 10 // --- // ---                     | PCDHB10      | <0.05 | -2.54032 |
| 15137296 ---                                                                                      |              | <0.05 | -2.54306 |
| 15136496 ---                                                                                      |              | <0.05 | -2.54325 |
| 14934309 ---                                                                                      |              | <0.05 | -2.54411 |
| 15090612 ---                                                                                      |              | <0.05 | -2.54502 |
| 15024826 XM_001914958 // LOC100057715 // phosphatidylethanolamine-binding protein 4-like // ---   | LOC100057715 | <0.05 | -2.54583 |
| 15093314 ---                                                                                      |              | <0.05 | -2.54609 |
| 14931577 ---                                                                                      |              | <0.05 | -2.54921 |
| 15112441 ---                                                                                      |              | <0.05 | -2.55077 |
| 15044306 ---                                                                                      |              | <0.05 | -2.55194 |
| 14928095 ---                                                                                      |              | <0.05 | -2.55367 |
| 15070451 ---                                                                                      |              | <0.05 | -2.55458 |
| 14928101 ---                                                                                      |              | <0.05 | -2.55754 |
| 15013338 XM_001503354 // CBLB // Cbl proto-oncogene, E3 ubiquitin protein ligase B // --- // 100  | CBLB         | <0.05 | -2.55817 |
| 15108299 ---                                                                                      |              | <0.05 | -2.5591  |
| 14927221 ---                                                                                      |              | <0.05 | -2.56008 |
| 15132334 ---                                                                                      |              | <0.05 | -2.56081 |
| 15070053 ENSECAT00000009904 // SLC7A5 // solute carrier family 7 (amino acid transporter light c  | SLC7A5       | <0.05 | -2.56166 |
| 15016558 NM_001163971 // SLC2A1 // solute carrier family 2 (facilitated glucose transporter), me  | SLC2A1       | <0.05 | -2.56175 |
| 15020662 ---                                                                                      |              | <0.05 | -2.56186 |
| 15055752 ---                                                                                      |              | <0.05 | -2.56298 |
| 15079436 ---                                                                                      |              | <0.05 | -2.56307 |
| 15137142 ---                                                                                      |              | <0.05 | -2.56436 |
| 14926597 ---                                                                                      |              | <0.05 | -2.56438 |
| 14929165 ---                                                                                      |              | <0.05 | -2.56535 |
| 15082155 ---                                                                                      |              | <0.05 | -2.56541 |
| 15135180 ---                                                                                      |              | <0.05 | -2.56618 |
| 15075503 XM_001495199 // LOC100064229 // NKG2D ligand 4-like // --- // 100064229 /// ENSECAT0000  | LOC100064229 | <0.05 | -2.56677 |
| 14954220 ---                                                                                      |              | <0.05 | -2.5695  |
| 15034066 ---                                                                                      |              | <0.05 | -2.57003 |
| 14939998 ENSECAT00000017987 // TRAV40 // T cell receptor alpha variable 40 // --- // ---          | TRAV40       | <0.05 | -2.57206 |
| 15048211 XM_003364027 // LOC100630573 // uncharacterized LOC100630573 // --- // 100630573 /// EN  | LOC100630573 | <0.05 | -2.57351 |
| 15056065 ---                                                                                      |              | <0.05 | -2.57771 |
| 14946612 ---                                                                                      |              | <0.05 | -2.57951 |
| 15137600 ---                                                                                      |              | <0.05 | -2.58036 |
| 15036483 ---                                                                                      |              | <0.05 | -2.58215 |
| 15112692 XM_001504920 // LOC100055858 // lymphatic vessel endothelial hyaluronan receptor 1       | LOC100055858 | <0.05 | -2.58504 |
| 14953019 AJ319910 // CX43 // connexin 43 // --- // 100067229                                      | CX43         | <0.05 | -2.58604 |
| 14954359 ---                                                                                      |              | <0.05 | -2.58658 |
| 14929407 ---                                                                                      |              | <0.05 | -2.58902 |
| 15132007 ---                                                                                      |              | <0.05 | -2.58914 |
| 14956181 ---                                                                                      |              | <0.05 | -2.58939 |
| 14929497 ---                                                                                      |              | <0.05 | -2.59114 |
| 15110192 ---                                                                                      |              | <0.05 | -2.594   |
| 15014202 ENSECAT00000006095 // LOC100059159 // thrombopoietin-like // --- // 100059159 /// XM_00  | LOC100059159 | <0.05 | -2.59413 |
| 15132900 XM_001489536 // CHRDL1 // chordin-like 1 // --- // 100059105 /// ENSECAT00000012735 //   | CHRDL1       | <0.05 | -2.5946  |
| 15111238 ---                                                                                      |              | <0.05 | -2.59608 |
| 15123605 ---                                                                                      |              | <0.05 | -2.59712 |
| 15070950 ---                                                                                      |              | <0.05 | -2.59875 |
| 15101112 ---                                                                                      |              | <0.05 | -2.59998 |
| 15112164 ---                                                                                      |              | <0.05 | -2.60059 |
| 15044644 ---                                                                                      |              | <0.05 | -2.60074 |
| 15021008 ---                                                                                      |              | <0.05 | -2.60148 |
| 15115595 XM_001489548 // LOC100055301 // thioredoxin domain-containing protein 2-like // --- //   | LOC100055301 | <0.05 | -2.60206 |
| 15026036 ENSECAT00000015464 // FGF2 // fibroblast growth factor 2 (basic) // --- // 100033955 //  | FGF2         | <0.05 | -2.60287 |
| 15136394 ---                                                                                      |              | <0.05 | -2.60763 |
| 14972150 ENSECAT00000016926 // LOC100067133 // excitatory amino acid transporter 2-like // --- // | LOC100067133 | <0.05 | -2.60906 |
| 15066093 XM_001497779 // LOC100067821 // zinc transporter ZIP8-like // --- // 100067821 /// ENSE  | LOC100067821 | <0.05 | -2.61334 |
| 14980260 ENSECAT00000024095 // ATF7IP2 // activating transcription factor 7 interacting protein   | ATF7IP2      | <0.05 | -2.61344 |
| 14996187 ---                                                                                      |              | <0.05 | -2.61454 |
| 15128317 ---                                                                                      |              | <0.05 | -2.61545 |
| 15013212 ENSECAT00000001188 // LOC100061617 // zinc finger BED domain-containing protein 2-like   | LOC100061617 | <0.05 | -2.61894 |
| 15007756 ENSECAT00000026771 // COL3A1 // collagen, type III, alpha 1 // --- // 100034123          | COL3A1       | <0.05 | -2.61906 |
| 15005709 ---                                                                                      |              | <0.05 | -2.62044 |
| 15028958 ---                                                                                      |              | <0.05 | -2.62218 |
| 14955496 ---                                                                                      |              | <0.05 | -2.62283 |



|                                                                                                  |              |       |          |
|--------------------------------------------------------------------------------------------------|--------------|-------|----------|
| 14935394 ---                                                                                     |              | <0.05 | -2.62368 |
| 14948020 ---                                                                                     |              | <0.05 | -2.6237  |
| 15082554 ---                                                                                     |              | <0.05 | -2.62452 |
| 15132247 ---                                                                                     |              | <0.05 | -2.62511 |
| 14953591 XM_001491402 // LOC100058436 // histo-blood group ABO system transferase-like // --- // | LOC100058436 | <0.05 | -2.62571 |
| 15021253 ---                                                                                     |              | <0.05 | -2.62683 |
| 14929249 ---                                                                                     |              | <0.05 | -2.62714 |
| 15111627 ---                                                                                     |              | <0.05 | -2.63169 |
| 15116648 XM_001489163 // MALT1 // mucosa associated lymphoid tissue lymphoma translocation gene  | MALT1        | <0.05 | -2.63238 |
| 15015210 ---                                                                                     |              | <0.05 | -2.63473 |
| 15059852 ---                                                                                     |              | <0.05 | -2.63741 |
| 14998829 ---                                                                                     |              | <0.05 | -2.63949 |
| 15128374 ---                                                                                     |              | <0.05 | -2.64073 |
| 15093311 ---                                                                                     |              | <0.05 | -2.64239 |
| 14994469 ---                                                                                     |              | <0.05 | -2.64386 |
| 15055906 ---                                                                                     |              | <0.05 | -2.64524 |
| 14982111 ---                                                                                     |              | <0.05 | -2.6464  |
| 15136586 ---                                                                                     |              | <0.05 | -2.64874 |
| 14930633 ---                                                                                     |              | <0.05 | -2.65086 |
| 15013465 ---                                                                                     |              | <0.05 | -2.65212 |
| 15114568 ---                                                                                     |              | <0.05 | -2.6535  |
| 14954214 ---                                                                                     |              | <0.05 | -2.65353 |
| 14926935 ---                                                                                     |              | <0.05 | -2.656   |
| 14931407 ---                                                                                     |              | <0.05 | -2.65709 |
| 15029122 ---                                                                                     |              | <0.05 | -2.65724 |
| 15131837 ---                                                                                     |              | <0.05 | -2.65745 |
| 15125678 ---                                                                                     |              | <0.05 | -2.65757 |
| 14952511 ---                                                                                     |              | <0.05 | -2.66101 |
| 15136596 ---                                                                                     |              | <0.05 | -2.66428 |
| 14942885 ---                                                                                     |              | <0.05 | -2.66902 |
| 14930081 ---                                                                                     |              | <0.05 | -2.67337 |
| 15005189 ---                                                                                     |              | <0.05 | -2.67407 |
| 14927939 ---                                                                                     |              | <0.05 | -2.67421 |
| 15098184 ENSECAT00000029138 // HMGA2 // high mobility group AT-hook 2 // --- //                  | HMGA2        | <0.05 | -2.67538 |
| 15134924 ---                                                                                     |              | <0.05 | -2.67579 |
| 15105833 ENSECAT00000012847 // SYCE2 // synaptonemal complex central element protein 2 // --- // | SYCE2        | <0.05 | -2.68015 |
| 14943623 ---                                                                                     |              | <0.05 | -2.68179 |
| 14929155 ---                                                                                     |              | <0.05 | -2.68219 |
| 15127028 ---                                                                                     |              | <0.05 | -2.68383 |
| 14988261 ---                                                                                     |              | <0.05 | -2.68404 |
| 14929191 ---                                                                                     |              | <0.05 | -2.68569 |
| 15077811 XM_001497221 // ITGB8 // integrin, beta 8 // --- // 100053462 /// ENSECAT00000020530 // | ITGB8        | <0.05 | -2.68677 |
| 15134250 ---                                                                                     |              | <0.05 | -2.68735 |
| 14926417 ---                                                                                     |              | <0.05 | -2.68826 |
| 15028959 ---                                                                                     |              | <0.05 | -2.69015 |
| 15032288 ---                                                                                     |              | <0.05 | -2.69093 |
| 15071042 ---                                                                                     |              | <0.05 | -2.69144 |
| 15128655 ---                                                                                     |              | <0.05 | -2.69222 |
| 15023175 XM_001500815 // LOC100071130 // CAMPATH-1 antigen-like // --- // 100071130 /// ENSECAT0 | LOC100071130 | <0.05 | -2.69322 |
| 15136524 ---                                                                                     |              | <0.05 | -2.69613 |
| 15060055 ---                                                                                     |              | <0.05 | -2.6968  |
| 15137658 ---                                                                                     |              | <0.05 | -2.69751 |
| 15137508 ---                                                                                     |              | <0.05 | -2.69844 |
| 15131301 ---                                                                                     |              | <0.05 | -2.70081 |
| 14948811 ---                                                                                     |              | <0.05 | -2.70464 |
| 14925671 ---                                                                                     |              | <0.05 | -2.7067  |
| 14925901 ---                                                                                     |              | <0.05 | -2.7067  |
| 14973455 ---                                                                                     |              | <0.05 | -2.70728 |
| 15132242 ---                                                                                     |              | <0.05 | -2.70883 |
| 15043462 ---                                                                                     |              | <0.05 | -2.70911 |
| 15120425 ENSECAT00000022867 // ATP8B1 // ATPase, aminophospholipid transporter, class I, type 8B | ATP8B1       | <0.05 | -2.70944 |
| 15006835 ENSECAT00000020282 // LOC100058814 // keratin, type I cytoskeletal 18-like // --- // 10 | LOC100058814 | <0.05 | -2.71016 |
| 15004573 ---                                                                                     |              | <0.05 | -2.71026 |
| 14934999 ---                                                                                     |              | <0.05 | -2.71062 |
| 14984598 ---                                                                                     |              | <0.05 | -2.71088 |
| 15058195 ---                                                                                     |              | <0.05 | -2.712   |
| 14931779 ---                                                                                     |              | <0.05 | -2.71435 |
| 15107278 XM_001496836 // LOC100066618 // olfactory receptor 52B4-like // --- // 100066618 /// EN | LOC100066618 | <0.05 | -2.71543 |
| 14925389 ---                                                                                     |              | <0.05 | -2.71786 |
| 15013363 ---                                                                                     |              | <0.05 | -2.72013 |
| 15137072 ---                                                                                     |              | <0.05 | -2.72136 |
| 15119703 ---                                                                                     |              | <0.05 | -2.72177 |
| 15137482 ---                                                                                     |              | <0.05 | -2.72384 |
| 14956176 ---                                                                                     |              | <0.05 | -2.72409 |
| 14929601 ---                                                                                     |              | <0.05 | -2.72411 |
| 15104496 ---                                                                                     |              | <0.05 | -2.72447 |
| 14928015 ---                                                                                     |              | <0.05 | -2.72533 |
| 15131583 ---                                                                                     |              | <0.05 | -2.72906 |
| 14931595 ---                                                                                     |              | <0.05 | -2.72975 |
| 14927791 ---                                                                                     |              | <0.05 | -2.73122 |
| 14929171 ---                                                                                     |              | <0.05 | -2.7357  |
| 14947718 ---                                                                                     |              | <0.05 | -2.73641 |
| 15124307 XM_001496042 // TRPS1 // trichorhinophalangeal syndrome 1 // --- // 100056821 /// ENSEC | TRPS1        | <0.05 | -2.73673 |
| 15055978 AY246707 // FGFR1 // fibroblast growth factor receptor 1 // --- // 100057614 /// XM_001 | FGFR1        | <0.05 | -2.73721 |
| 14931351 ---                                                                                     |              | <0.05 | -2.73734 |
| 14946849 ---                                                                                     |              | <0.05 | -2.73911 |
| 15062192 ---                                                                                     |              | <0.05 | -2.74001 |
| 14926175 ---                                                                                     |              | <0.05 | -2.74106 |
| 15057924 ---                                                                                     |              | <0.05 | -2.74216 |
| 14929635 ---                                                                                     |              | <0.05 | -2.74317 |
| 14936792 ---                                                                                     |              | <0.05 | -2.74449 |
| 15136630 ---                                                                                     |              | <0.05 | -2.74454 |
| 15107295 ---                                                                                     |              | <0.05 | -2.75079 |
| 15125627 ---                                                                                     |              | <0.05 | -2.75121 |
| 15068729 ---                                                                                     |              | <0.05 | -2.75234 |
| 14926291 ---                                                                                     |              | <0.05 | -2.75459 |
| 14987862 ---                                                                                     |              | <0.05 | -2.75528 |
| 15112962 ---                                                                                     |              | <0.05 | -2.75734 |
| 15003549 ---                                                                                     |              | <0.05 | -2.75798 |
| 14969057 ---                                                                                     |              | <0.05 | -2.75872 |
| 15132415 ---                                                                                     |              | <0.05 | -2.75907 |
| 14926929 ---                                                                                     |              | <0.05 | -2.75929 |
| 14925719 ---                                                                                     |              | <0.05 | -2.7604  |
| 15020276 ---                                                                                     |              | <0.05 | -2.76164 |
| 15110253 XM_001502061 // LOC100072182 // olfactory receptor 8B12-like // --- // 100072182 /// EN | LOC100072182 | <0.05 | -2.76445 |
| 14930399 ---                                                                                     |              | <0.05 | -2.76848 |

|                                                                                                   |              |  |       |          |
|---------------------------------------------------------------------------------------------------|--------------|--|-------|----------|
| 15128724 ---                                                                                      |              |  | <0.05 | -2.76898 |
| 14986706 ---                                                                                      |              |  | <0.05 | -2.7698  |
| 15115552 XM_001489105 // LOC100054445 // NADH dehydrogenase [ubiquinone] flavoprotein 2, mitocho  | LOC100054445 |  | <0.05 | -2.7731  |
| 15057944 ---                                                                                      |              |  | <0.05 | -2.77475 |
| 15100479 ---                                                                                      |              |  | <0.05 | -2.77487 |
| 14928965 ---                                                                                      |              |  | <0.05 | -2.78008 |
| 15073589 ---                                                                                      |              |  | <0.05 | -2.78026 |
| 14939786 ---                                                                                      |              |  | <0.05 | -2.78362 |
| 14926439 ---                                                                                      |              |  | <0.05 | -2.78597 |
| 15017465 ---                                                                                      |              |  | <0.05 | -2.78746 |
| 14931389 ---                                                                                      |              |  | <0.05 | -2.78977 |
| 15026539 ---                                                                                      |              |  | <0.05 | -2.79191 |
| 14929087 ---                                                                                      |              |  | <0.05 | -2.792   |
| 14992065 XM_001497574 // LOC100052694 // protein TSC21-like // --- // 100052694 /// ENSECAT00000  | LOC100052694 |  | <0.05 | -2.79246 |
| 15113583 ---                                                                                      |              |  | <0.05 | -2.79647 |
| 15136340 ---                                                                                      |              |  | <0.05 | -2.79679 |
| 15066022 ---                                                                                      |              |  | <0.05 | -2.79755 |
| 15059530 ENSECAT00000009567 // LOC100050839 // beta-parvin-like // --- // 100050839 /// XM_00148  | LOC100050839 |  | <0.05 | -2.7976  |
| 15014061 ---                                                                                      |              |  | <0.05 | -2.7981  |
| 15133229 ---                                                                                      |              |  | <0.05 | -2.79833 |
| 15093426 ---                                                                                      |              |  | <0.05 | -2.79945 |
| 14972903 XM_001498418 // LOC100068597 // olfactory receptor 5A1-like // --- // 100068597 /// ENS  | LOC100068597 |  | <0.05 | -2.7995  |
| 14936239 ---                                                                                      |              |  | <0.05 | -2.79997 |
| 14932235 ---                                                                                      |              |  | <0.05 | -2.80118 |
| 14991401 ---                                                                                      |              |  | <0.05 | -2.8032  |
| 15137476 ---                                                                                      |              |  | <0.05 | -2.80444 |
| 14929307 ---                                                                                      |              |  | <0.05 | -2.8061  |
| 14927071 ---                                                                                      |              |  | <0.05 | -2.80737 |
| 15086407 ENSECAT00000015768 // LOC100063020 // pygopus homolog 2-like // --- // 100063020 /// XM  | LOC100063020 |  | <0.05 | -2.80855 |
| 15112126 ---                                                                                      |              |  | <0.05 | -2.80968 |
| 14940014 ---                                                                                      |              |  | <0.05 | -2.8152  |
| 15132966 ---                                                                                      |              |  | <0.05 | -2.81615 |
| 15042170 ---                                                                                      |              |  | <0.05 | -2.8168  |
| 14932207 ---                                                                                      |              |  | <0.05 | -2.81716 |
| 14976277 ---                                                                                      |              |  | <0.05 | -2.81948 |
| 14939967 ---                                                                                      |              |  | <0.05 | -2.82331 |
| 15088547 ---                                                                                      |              |  | <0.05 | -2.8247  |
| 15021342 ---                                                                                      |              |  | <0.05 | -2.82595 |
| 15025944 ENSECAT00000010490 // LOC100063623 // heat shock 70 kDa protein 4L-like // --- // 10006  | LOC100063623 |  | <0.05 | -2.82666 |
| 15056555 XM_003364248 // LOC100629514 // beta-defensin 33-like // --- // 100629514 /// ENSECAT00  | LOC100629514 |  | <0.05 | -2.82787 |
| 14925713 ---                                                                                      |              |  | <0.05 | -2.8281  |
| 15128930 ---                                                                                      |              |  | <0.05 | -2.82934 |
| 14976559 ---                                                                                      |              |  | <0.05 | -2.83154 |
| 15137768 ---                                                                                      |              |  | <0.05 | -2.83392 |
| 15083354 XM_001491416 // LOC100050381 // olfactory receptor 9A4-like // --- // 100050381 /// ENS  | LOC100050381 |  | <0.05 | -2.83591 |
| 15081182 ---                                                                                      |              |  | <0.05 | -2.83618 |
| 14951946 XM_003362303 // LOC100630300 // olfactory receptor 10A7-like // --- // 100630300 /// EN  | LOC100630300 |  | <0.05 | -2.83779 |
| 15087145 ENSECAT000000023956 // LOC100065052 // gap junction alpha-5 protein-like // --- // 10006 | LOC100065052 |  | <0.05 | -2.83819 |
| 15059867 ---                                                                                      |              |  | <0.05 | -2.8383  |
| 15014855 ---                                                                                      |              |  | <0.05 | -2.83877 |
| 14929093 ---                                                                                      |              |  | <0.05 | -2.84187 |
| 15020226 ---                                                                                      |              |  | <0.05 | -2.84196 |
| 14990082 XM_001499765 // LOC100070088 // cytochrome P450 1B1-like // --- // 100070088 /// ENSECA  | LOC100070088 |  | <0.05 | -2.84501 |
| 15070408 ---                                                                                      |              |  | <0.05 | -2.84512 |
| 14943907 ---                                                                                      |              |  | <0.05 | -2.84566 |
| 15097352 ---                                                                                      |              |  | <0.05 | -2.84743 |
| 15120935 ---                                                                                      |              |  | <0.05 | -2.85027 |
| 14929023 ---                                                                                      |              |  | <0.05 | -2.85118 |
| 14972858 ---                                                                                      |              |  | <0.05 | -2.85228 |
| 15123654 ---                                                                                      |              |  | <0.05 | -2.85285 |
| 14929251 ---                                                                                      |              |  | <0.05 | -2.85601 |
| 15078440 NM_001114147 // MET // met proto-oncogene (hepatocyte growth factor receptor) // --- //  | MET          |  | <0.05 | -2.85853 |
| 14931443 ---                                                                                      |              |  | <0.05 | -2.85942 |
| 14931567 ---                                                                                      |              |  | <0.05 | -2.85995 |
| 15092613 ENSECAT00000017575 // VCAM // vascular cell adhesion molecule // --- // 100050252 /// N  | VCAM         |  | <0.05 | -2.86015 |
| 15006666 ---                                                                                      |              |  | <0.05 | -2.86154 |
| 14931155 ---                                                                                      |              |  | <0.05 | -2.8617  |
| 15077032 ---                                                                                      |              |  | <0.05 | -2.86439 |
| 15085220 ENSECAT000000023431 // MIR1255B // microRNA mir-1255b // --- // 100314985                | MIR1255B     |  | <0.05 | -2.86547 |
| 15040996 NR_032985 // MIR296 // microRNA mir-296 // --- // 100314887                              | MIR296       |  | <0.05 | -2.8656  |
| 14929379 ---                                                                                      |              |  | <0.05 | -2.86745 |
| 15008330 ---                                                                                      |              |  | <0.05 | -2.86915 |
| 14934829 XM_001502951 // LOC100072886 // urokinase-type plasminogen activator-like // --- // 100  | LOC100072886 |  | <0.05 | -2.86939 |
| 14925155 ---                                                                                      |              |  | <0.05 | -2.87019 |
| 15024993 ---                                                                                      |              |  | <0.05 | -2.87039 |
| 14932301 ---                                                                                      |              |  | <0.05 | -2.87502 |
| 14929989 ---                                                                                      |              |  | <0.05 | -2.87699 |
| 15020754 ---                                                                                      |              |  | <0.05 | -2.87727 |
| 15054693 ---                                                                                      |              |  | <0.05 | -2.87747 |
| 14947745 XM_001502073 // LOC100072195 // olfactory receptor 4K3-like // --- // 100072195 /// ENS  | LOC100072195 |  | <0.05 | -2.87797 |
| 15089458 ---                                                                                      |              |  | <0.05 | -2.88064 |
| 14927553 ---                                                                                      |              |  | <0.05 | -2.88265 |
| 15093090 XM_001494684 // CLCA4 // chloride channel accessory 4 // --- // 100063474 /// ENSECAT00  | CLCA4        |  | <0.05 | -2.88329 |
| 14929727 ---                                                                                      |              |  | <0.05 | -2.88368 |
| 15136376 ---                                                                                      |              |  | <0.05 | -2.88712 |
| 15092908 ---                                                                                      |              |  | <0.05 | -2.88935 |
| 14972483 ENSECAT00000014769 // C1QTNF4 // C1q and tumor necrosis factor related protein 4 // ---  | C1QTNF4      |  | <0.05 | -2.89003 |
| 14931343 ---                                                                                      |              |  | <0.05 | -2.89019 |
| 14973136 ---                                                                                      |              |  | <0.05 | -2.89281 |
| 15041693 ---                                                                                      |              |  | <0.05 | -2.89594 |
| 14999527 ENSECAT00000010605 // LOC100629337 // sentan-like // --- // 100629337 /// XM_003363081   | LOC100629337 |  | <0.05 | -2.90213 |
| 14925779 ---                                                                                      |              |  | <0.05 | -2.90503 |
| 15013425 ENSECAT00000002615 // ABI3BP // ABI family, member 3 (NESH) binding protein // --- // -  | ABI3BP       |  | <0.05 | -2.90669 |
| 15019975 ---                                                                                      |              |  | <0.05 | -2.90786 |
| 15120810 ---                                                                                      |              |  | <0.05 | -2.91025 |
| 15066246 ---                                                                                      |              |  | <0.05 | -2.91252 |
| 15108587 ---                                                                                      |              |  | <0.05 | -2.91441 |
| 15043266 ---                                                                                      |              |  | <0.05 | -2.91657 |
| 14945124 ---                                                                                      |              |  | <0.05 | -2.9202  |
| 15042918 ---                                                                                      |              |  | <0.05 | -2.92753 |
| 14926477 ---                                                                                      |              |  | <0.05 | -2.9284  |
| 15013022 ---                                                                                      |              |  | <0.05 | -2.92856 |
| 14927703 ---                                                                                      |              |  | <0.05 | -2.92943 |
| 14945245 ---                                                                                      |              |  | <0.05 | -2.93039 |
| 15012931 ---                                                                                      |              |  | <0.05 | -2.93068 |
| 14952139 ---                                                                                      |              |  | <0.05 | -2.93093 |



|                                                                                                   |              |       |          |
|---------------------------------------------------------------------------------------------------|--------------|-------|----------|
| 15085669 ---                                                                                      |              | <0.05 | -3.10739 |
| 15129942 ---                                                                                      |              | <0.05 | -3.1082  |
| 14990772 ---                                                                                      |              | <0.05 | -3.11002 |
| 14930397 ---                                                                                      |              | <0.05 | -3.11462 |
| 14925393 ---                                                                                      |              | <0.05 | -3.116   |
| 15128758 ---                                                                                      |              | <0.05 | -3.1178  |
| 15135502 ---                                                                                      |              | <0.05 | -3.11852 |
| 14925819 ---                                                                                      |              | <0.05 | -3.11902 |
| 14925849 ---                                                                                      |              | <0.05 | -3.11902 |
| 14925891 ---                                                                                      |              | <0.05 | -3.11902 |
| 14925963 ---                                                                                      |              | <0.05 | -3.11902 |
| 15099118 ---                                                                                      |              | <0.05 | -3.12296 |
| 15107545 ---                                                                                      |              | <0.05 | -3.12476 |
| 14941326 ---                                                                                      |              | <0.05 | -3.12659 |
| 15069482 ---                                                                                      |              | <0.05 | -3.12753 |
| 15027283 ENSECAT0000006780 // ZNF187 // zinc finger protein 187 // --- // 100061664 /// XM_0014   | ZNF187       | <0.05 | -3.13068 |
| 14931141 ---                                                                                      |              | <0.05 | -3.13205 |
| 15046024 ---                                                                                      |              | <0.05 | -3.13687 |
| 15048679 ---                                                                                      |              | <0.05 | -3.13732 |
| 14966652 ---                                                                                      |              | <0.05 | -3.13877 |
| 15024877 ---                                                                                      |              | <0.05 | -3.14002 |
| 15073587 ---                                                                                      |              | <0.05 | -3.14002 |
| 15109355 ---                                                                                      |              | <0.05 | -3.14389 |
| 15063456 XM_003364358 // LOC100630445 // meiosis expressed gene 1 protein homolog // --- // 1006  | LOC100630445 | <0.05 | -3.14664 |
| 14937666 ---                                                                                      |              | <0.05 | -3.14925 |
| 14929499 ---                                                                                      |              | <0.05 | -3.14958 |
| 14927773 ---                                                                                      |              | <0.05 | -3.15116 |
| 15121415 ---                                                                                      |              | <0.05 | -3.15556 |
| 14946480 ---                                                                                      |              | <0.05 | -3.15574 |
| 15131496 ---                                                                                      |              | <0.05 | -3.1582  |
| 15028965 ---                                                                                      |              | <0.05 | -3.16049 |
| 14955908 ---                                                                                      |              | <0.05 | -3.16182 |
| 14930617 ---                                                                                      |              | <0.05 | -3.16643 |
| 15126566 NM_001166081 // DEFA22 // Paneth cell-specific alpha-defensin 22 // --- // 100306994 //  | DEFA22       | <0.05 | -3.16817 |
| 15054811 XM_001498489 // LOC100068667 // SAM domain-containing protein SAMSN-1-like // --- // 10  | LOC100068667 | <0.05 | -3.16948 |
| 15076477 ---                                                                                      |              | <0.05 | -3.17004 |
| 15121223 ---                                                                                      |              | <0.05 | -3.17279 |
| 15025773 XM_001915633 // GAB1 // GRB2-associated binding protein 1 // --- // 100062924 /// ENSEC  | GAB1         | <0.05 | -3.17976 |
| 14926443 ---                                                                                      |              | <0.05 | -3.18091 |
| 14972566 XM_003362608 // LOC100058728 // olfactory receptor 4S2-like // --- // 100058728 /// ENS  | LOC100058728 | <0.05 | -3.18101 |
| 14929429 ---                                                                                      |              | <0.05 | -3.18164 |
| 15136514 ---                                                                                      |              | <0.05 | -3.18626 |
| 14925813 ---                                                                                      |              | <0.05 | -3.19016 |
| 14925843 ---                                                                                      |              | <0.05 | -3.19016 |
| 14925885 ---                                                                                      |              | <0.05 | -3.19016 |
| 14925957 ---                                                                                      |              | <0.05 | -3.19016 |
| 14984276 ---                                                                                      |              | <0.05 | -3.19054 |
| 15121846 ---                                                                                      |              | <0.05 | -3.19377 |
| 14945336 ---                                                                                      |              | <0.05 | -3.19458 |
| 15133392 ---                                                                                      |              | <0.05 | -3.19605 |
| 15070500 ---                                                                                      |              | <0.05 | -3.19664 |
| 15088028 ---                                                                                      |              | <0.05 | -3.19931 |
| 15137014 ---                                                                                      |              | <0.05 | -3.20102 |
| 15085022 ENSECAT00000019326 // LOC100052032 // uncharacterized protein C1orf21-like // --- // 10  | LOC100052032 | <0.05 | -3.20145 |
| 15019729 ---                                                                                      |              | <0.05 | -3.20549 |
| 14943721 ---                                                                                      |              | <0.05 | -3.20739 |
| 15137222 ---                                                                                      |              | <0.05 | -3.21448 |
| 15071995 ---                                                                                      |              | <0.05 | -3.21448 |
| 15059089 ---                                                                                      |              | <0.05 | -3.21537 |
| 14931393 ---                                                                                      |              | <0.05 | -3.21558 |
| 15028943 ---                                                                                      |              | <0.05 | -3.21781 |
| 14929563 ---                                                                                      |              | <0.05 | -3.223   |
| 14993190 ---                                                                                      |              | <0.05 | -3.22346 |
| 14927665 ---                                                                                      |              | <0.05 | -3.22439 |
| 15137638 ---                                                                                      |              | <0.05 | -3.22898 |
| 15078788 XM_001501658 // LOC100071801 // tetraspanin-33-like // --- // 100071801 /// ENSECAT0000  | LOC100071801 | <0.05 | -3.22988 |
| 14927313 ---                                                                                      |              | <0.05 | -3.23167 |
| 15108637 ---                                                                                      |              | <0.05 | -3.24019 |
| 15096376 ENSECAT00000010436 // ARNTL2 // aryl hydrocarbon receptor nuclear translocator-like 2 /  | ARNTL2       | <0.05 | -3.24092 |
| 15128536 ---                                                                                      |              | <0.05 | -3.25083 |
| 15055717 ---                                                                                      |              | <0.05 | -3.25465 |
| 15082491 ENSECAT00000008802 // LOC100071408 // protein FAM3C-like // --- // 100071408 /// XM_001  | LOC100071408 | <0.05 | -3.2551  |
| 14993035 ---                                                                                      |              | <0.05 | -3.25939 |
| 15019850 ---                                                                                      |              | <0.05 | -3.2602  |
| 15079472 ---                                                                                      |              | <0.05 | -3.26159 |
| 14927691 ---                                                                                      |              | <0.05 | -3.26211 |
| 14984817 ---                                                                                      |              | <0.05 | -3.2642  |
| 14949731 ---                                                                                      |              | <0.05 | -3.26431 |
| 15064133 ---                                                                                      |              | <0.05 | -3.26551 |
| 14926739 ---                                                                                      |              | <0.05 | -3.26665 |
| 15137232 ---                                                                                      |              | <0.05 | -3.27384 |
| 14958187 XM_001490118 // LOC100056324 // neuronal pentraxin-1-like // --- // 100056324 /// ENSEC  | LOC100056324 | <0.05 | -3.27796 |
| 15035567 ---                                                                                      |              | <0.05 | -3.2846  |
| 15046196 ---                                                                                      |              | <0.05 | -3.28621 |
| 15010098 ---                                                                                      |              | <0.05 | -3.29045 |
| 14976229 ENSECAT00000009720 // MIR1255B // microRNA mir-1255b // --- // 100314985                 | MIR1255B     | <0.05 | -3.29412 |
| 14953829 ---                                                                                      |              | <0.05 | -3.29556 |
| 15078610 ---                                                                                      |              | <0.05 | -3.29819 |
| 15127773 ENSECAT00000014937 // TIMP1 // TIMP metalloproteinase inhibitor 1 // --- // 100034220 // | TIMP1        | <0.05 | -3.3024  |
| 14972205 ---                                                                                      |              | <0.05 | -3.30294 |
| 15136974 ---                                                                                      |              | <0.05 | -3.30964 |
| 15054753 ---                                                                                      |              | <0.05 | -3.30973 |
| 15136716 ---                                                                                      |              | <0.05 | -3.30973 |
| 15126653 NM_001082526 // IL1B // interleukin 1, beta // --- // 100034237 /// ENSECAT00000000066   | IL1B         | <0.05 | -3.31016 |
| 14934915 ---                                                                                      |              | <0.05 | -3.31481 |
| 15136522 ---                                                                                      |              | <0.05 | -3.31806 |
| 14931545 ---                                                                                      |              | <0.05 | -3.31988 |
| 15121374 ---                                                                                      |              | <0.05 | -3.32408 |
| 15131923 ---                                                                                      |              | <0.05 | -3.32539 |
| 14994855 ---                                                                                      |              | <0.05 | -3.32577 |
| 15004307 ---                                                                                      |              | <0.05 | -3.32649 |
| 14931417 ---                                                                                      |              | <0.05 | -3.32658 |
| 14931619 ---                                                                                      |              | <0.05 | -3.33319 |
| 15033651 ---                                                                                      |              | <0.05 | -3.33392 |
| 15035558 ---                                                                                      |              | <0.05 | -3.33576 |
| 14926399 ---                                                                                      |              | <0.05 | -3.33643 |

|                                                                                                   |              |       |          |
|---------------------------------------------------------------------------------------------------|--------------|-------|----------|
| 14926707 ---                                                                                      |              | <0.05 | -3.34596 |
| 15128812 ---                                                                                      |              | <0.05 | -3.34604 |
| 14928029 ---                                                                                      |              | <0.05 | -3.34654 |
| 14984072 ---                                                                                      |              | <0.05 | -3.34669 |
| 15069793 ---                                                                                      |              | <0.05 | -3.34801 |
| 15126657 ---                                                                                      |              | <0.05 | -3.35346 |
| 15130776 ---                                                                                      |              | <0.05 | -3.35536 |
| 15110169 XM_001501632 // LOC100071779 // transmembrane protein 225-like // --- // 100071779 //    | LOC100071779 | <0.05 | -3.35798 |
| 15133192 ---                                                                                      |              | <0.05 | -3.36031 |
| 15094343 ---                                                                                      |              | <0.05 | -3.36354 |
| 14928947 ---                                                                                      |              | <0.05 | -3.36808 |
| 15126569 ---                                                                                      |              | <0.05 | -3.37028 |
| 15128843 ---                                                                                      |              | <0.05 | -3.37046 |
| 14926365 ---                                                                                      |              | <0.05 | -3.37069 |
| 15095792 ---                                                                                      |              | <0.05 | -3.37145 |
| 15116076 ---                                                                                      |              | <0.05 | -3.37308 |
| 15054861 ---                                                                                      |              | <0.05 | -3.37352 |
| 14928995 ---                                                                                      |              | <0.05 | -3.37426 |
| 15062886 XM_001915060 // LOC100070887 // olfactory receptor 2L3-like // --- // 100070887 // ENS   | LOC100070887 | <0.05 | -3.37667 |
| 15107327 ---                                                                                      |              | <0.05 | -3.38216 |
| 14931555 ---                                                                                      |              | <0.05 | -3.38307 |
| 15054867 ---                                                                                      |              | <0.05 | -3.38333 |
| 14929345 ---                                                                                      |              | <0.05 | -3.38399 |
| 15043738 XM_001495466 // LOC100064612 // interferon alpha-14-like // --- // 100064612 // XM_001   | LOC100064612 | <0.05 | -3.38555 |
| 14927205 ---                                                                                      |              | <0.05 | -3.39141 |
| 15136402 ---                                                                                      |              | <0.05 | -3.39637 |
| 14994760 ---                                                                                      |              | <0.05 | -3.39653 |
| 14929247 ---                                                                                      |              | <0.05 | -3.40085 |
| 14926611 ---                                                                                      |              | <0.05 | -3.40423 |
| 15080983 ---                                                                                      |              | <0.05 | -3.40786 |
| 15136388 ---                                                                                      |              | <0.05 | -3.40914 |
| 15113406 NM_001081897 // ADORA2A // adenosine A2a receptor // --- // 100034039 // ENSECAT000000   | ADORA2A      | <0.05 | -3.41149 |
| 14927243 ---                                                                                      |              | <0.05 | -3.41168 |
| 14927537 ---                                                                                      |              | <0.05 | -3.42611 |
| 15136300 ---                                                                                      |              | <0.05 | -3.42642 |
| 15130216 ENSECAT00000008829 // LOC100147620 // uncharacterized LOC100147620 // --- // 100147620   | LOC100147620 | <0.05 | -3.42684 |
| 15066978 ---                                                                                      |              | <0.05 | -3.42702 |
| 15112574 ENSECAT00000008816 // LOC100071044 // achaete-scute homolog 3-like // --- // 100071044   | LOC100071044 | <0.05 | -3.42842 |
| 14931307 ---                                                                                      |              | <0.05 | -3.43446 |
| 15029534 ---                                                                                      |              | <0.05 | -3.43647 |
| 15038258 ENSECAT00000014089 // MMP9 // matrix metalloproteinase 9 (gelatinase B, 92kDa gelatinase | MMP9         | <0.05 | -3.43892 |
| 14968552 ---                                                                                      |              | <0.05 | -3.43963 |
| 15108199 ---                                                                                      |              | <0.05 | -3.44022 |
| 14956234 ---                                                                                      |              | <0.05 | -3.44242 |
| 15080887 AY752932 // IGFBP-3 // insulin-like growth factor binding protein-3 // --- // 100034155  | IGFBP-3      | <0.05 | -3.44311 |
| 14939905 ---                                                                                      |              | <0.05 | -3.44366 |
| 15136214 ---                                                                                      |              | <0.05 | -3.44415 |
| 14947607 ---                                                                                      |              | <0.05 | -3.44663 |
| 15063753 ---                                                                                      |              | <0.05 | -3.45013 |
| 15001600 ---                                                                                      |              | <0.05 | -3.45207 |
| 15097189 ---                                                                                      |              | <0.05 | -3.45297 |
| 15133078 XM_001491814 // LOC100058519 // RING finger protein 113A-like // --- // 100058519 // E   | LOC100058519 | <0.05 | -3.46212 |
| 15007879 ---                                                                                      |              | <0.05 | -3.46517 |
| 14981739 ---                                                                                      |              | <0.05 | -3.46795 |
| 15126658 ---                                                                                      |              | <0.05 | -3.46843 |
| 15071082 ---                                                                                      |              | <0.05 | -3.47044 |
| 14956667 ---                                                                                      |              | <0.05 | -3.47157 |
| 14957143 ENSECAT00000020501 // LAMA4 // laminin, alpha 4 // --- // 100066875                      | LAMA4        | <0.05 | -3.47189 |
| 15129823 ---                                                                                      |              | <0.05 | -3.47435 |
| 15011592 ---                                                                                      |              | <0.05 | -3.47553 |
| 14927497 ---                                                                                      |              | <0.05 | -3.47579 |
| 15136198 ---                                                                                      |              | <0.05 | -3.47608 |
| 15060308 ENSECAT00000022648 // FGD6 // FYVE, RhoGEF and PH domain containing 6 // --- // 1000651  | FGD6         | <0.05 | -3.47951 |
| 14926543 ---                                                                                      |              | <0.05 | -3.48049 |
| 15121336 ---                                                                                      |              | <0.05 | -3.48436 |
| 15095862 ENSECAT00000026701 // LOC100053371 // solute carrier family 2, facilitated glucose tran  | LOC100053371 | <0.05 | -3.48466 |
| 14929301 ---                                                                                      |              | <0.05 | -3.49072 |
| 15011672 ---                                                                                      |              | <0.05 | -3.494   |
| 14949318 ---                                                                                      |              | <0.05 | -3.49556 |
| 15121204 ---                                                                                      |              | <0.05 | -3.49595 |
| 15137128 ---                                                                                      |              | <0.05 | -3.49814 |
| 14959243 ---                                                                                      |              | <0.05 | -3.50216 |
| 15111704 ---                                                                                      |              | <0.05 | -3.50256 |
| 15057844 ---                                                                                      |              | <0.05 | -3.50406 |
| 15126655 ---                                                                                      |              | <0.05 | -3.50934 |
| 15088483 ---                                                                                      |              | <0.05 | -3.51123 |
| 14965220 ENSECAT00000016191 // C17orf57 // chromosome 17 open reading frame 57 // --- // ---      | C17orf57     | <0.05 | -3.51209 |
| 14995832 ---                                                                                      |              | <0.05 | -3.51261 |
| 14952659 ---                                                                                      |              | <0.05 | -3.51274 |
| 15025152 ---                                                                                      |              | <0.05 | -3.51483 |
| 15124133 ---                                                                                      |              | <0.05 | -3.51496 |
| 14955480 ---                                                                                      |              | <0.05 | -3.51821 |
| 15063273 ---                                                                                      |              | <0.05 | -3.51858 |
| 15137534 ---                                                                                      |              | <0.05 | -3.51988 |
| 15075276 ---                                                                                      |              | <0.05 | -3.52059 |
| 15026423 ---                                                                                      |              | <0.05 | -3.52424 |
| 15137122 ---                                                                                      |              | <0.05 | -3.52761 |
| 15131197 ---                                                                                      |              | <0.05 | -3.53014 |
| 15048002 XM_001495656 // LOC100064891 // interferon alpha-inducible protein 27-like protein 2-li  | LOC100064891 | <0.05 | -3.53681 |
| 14998181 ---                                                                                      |              | <0.05 | -3.54678 |
| 15071513 ---                                                                                      |              | <0.05 | -3.54963 |
| 15137484 ---                                                                                      |              | <0.05 | -3.55252 |
| 14931251 ---                                                                                      |              | <0.05 | -3.5536  |
| 14997253 ---                                                                                      |              | <0.05 | -3.55811 |
| 15077404 ---                                                                                      |              | <0.05 | -3.56239 |
| 14930211 ---                                                                                      |              | <0.05 | -3.56257 |
| 15075643 ---                                                                                      |              | <0.05 | -3.56714 |
| 14986789 ---                                                                                      |              | <0.05 | -3.57163 |
| 15119622 ---                                                                                      |              | <0.05 | -3.57185 |
| 15041468 ---                                                                                      |              | <0.05 | -3.57291 |
| 15117328 ---                                                                                      |              | <0.05 | -3.57349 |
| 15131850 ---                                                                                      |              | <0.05 | -3.57443 |
| 15137492 ---                                                                                      |              | <0.05 | -3.57569 |
| 15072198 ---                                                                                      |              | <0.05 | -3.57827 |
| 14940832 ---                                                                                      |              | <0.05 | -3.57894 |
| 15013980 ---                                                                                      |              | <0.05 | -3.57896 |

|          |                                                                                          |              |       |          |
|----------|------------------------------------------------------------------------------------------|--------------|-------|----------|
| 14995104 | ENSECAT00000015237 // PRRT3 // proline-rich transmembrane protein 3 // --- // 100058227  | PRRT3        | <0.05 | -3.58019 |
| 14939983 | ---                                                                                      |              | <0.05 | -3.58128 |
| 15056488 | ---                                                                                      |              | <0.05 | -3.59349 |
| 15136946 | ---                                                                                      |              | <0.05 | -3.59355 |
| 14978993 | ---                                                                                      |              | <0.05 | -3.59483 |
| 15100585 | ENSECAT00000017390 // DUSP16 // dual specificity phosphatase 16 // --- // ---            | DUSP16       | <0.05 | -3.60302 |
| 15050700 | ---                                                                                      |              | <0.05 | -3.60364 |
| 15137272 | ---                                                                                      |              | <0.05 | -3.60386 |
| 15099126 | ---                                                                                      |              | <0.05 | -3.60392 |
| 15021096 | ---                                                                                      |              | <0.05 | -3.6067  |
| 15122109 | ---                                                                                      |              | <0.05 | -3.61082 |
| 15121606 | ---                                                                                      |              | <0.05 | -3.6116  |
| 15136594 | ---                                                                                      |              | <0.05 | -3.61469 |
| 15095985 | ---                                                                                      |              | <0.05 | -3.61817 |
| 15036528 | ---                                                                                      |              | <0.05 | -3.62343 |
| 15051378 | ---                                                                                      |              | <0.05 | -3.62357 |
| 15043742 | NM_001114537 // IFN-ALPHA2 // interferon-alpha-2 // --- // 100052818 /// ENSECAT0000000  | IFN-ALPHA2   | <0.05 | -3.62698 |
| 14925143 | ---                                                                                      |              | <0.05 | -3.63126 |
| 15003886 | ---                                                                                      |              | <0.05 | -3.6336  |
| 14934259 | ---                                                                                      |              | <0.05 | -3.63626 |
| 14986735 | ---                                                                                      |              | <0.05 | -3.64197 |
| 14986584 | ---                                                                                      |              | <0.05 | -3.64336 |
| 15128893 | ---                                                                                      |              | <0.05 | -3.64338 |
| 15129144 | ENSECAT00000001318 // LOC100060576 // protein ARMCX6-like // --- // 100060576 /// XM_00  | LOC100060576 | <0.05 | -3.64347 |
| 15110203 | XM_001501870 // LOC100072019 // olfactory receptor 8B3-like // --- // 100072019 /// ENS  | LOC100072019 | <0.05 | -3.64371 |
| 15092562 | ---                                                                                      |              | <0.05 | -3.64823 |
| 15128156 | ---                                                                                      |              | <0.05 | -3.65032 |
| 14927249 | ---                                                                                      |              | <0.05 | -3.65364 |
| 15127309 | ---                                                                                      |              | <0.05 | -3.66238 |
| 15092377 | ENSECAT000000026303 // LOC100058329 // glutathione S-transferase Mu 1-like // --- // 100 | LOC100058329 | <0.05 | -3.66265 |
| 15039069 | ---                                                                                      |              | <0.05 | -3.67317 |
| 14972172 | ---                                                                                      |              | <0.05 | -3.67476 |
| 14953796 | ---                                                                                      |              | <0.05 | -3.67574 |
| 15000297 | ENSECAT00000008682 // SEMA3F // sema domain, immunoglobulin domain (Ig), short basic do  | SEMA3F       | <0.05 | -3.6789  |
| 15086111 | NR_032849 // MIR9A // microRNA mir-9a // --- // 100314814                                | MIR9A        | <0.05 | -3.6809  |
| 14929385 | ---                                                                                      |              | <0.05 | -3.683   |
| 14994675 | ---                                                                                      |              | <0.05 | -3.68302 |
| 15133574 | ---                                                                                      |              | <0.05 | -3.68786 |
| 15125687 | ---                                                                                      |              | <0.05 | -3.68863 |
| 14929261 | ---                                                                                      |              | <0.05 | -3.69199 |
| 15088751 | ---                                                                                      |              | <0.05 | -3.69297 |
| 14939928 | ---                                                                                      |              | <0.05 | -3.6938  |
| 14931553 | ---                                                                                      |              | <0.05 | -3.69495 |
| 15128859 | ---                                                                                      |              | <0.05 | -3.69785 |
| 14925917 | ---                                                                                      |              | <0.05 | -3.70516 |
| 15013547 | ---                                                                                      |              | <0.05 | -3.70554 |
| 14931409 | ---                                                                                      |              | <0.05 | -3.70615 |
| 15112423 | XM_001917853 // LOC100147393 // olfactory receptor 2D2-like // --- // 100147393 /// ENS  | LOC100147393 | <0.05 | -3.70695 |
| 15123299 | ---                                                                                      |              | <0.05 | -3.70714 |
| 15132024 | ---                                                                                      |              | <0.05 | -3.70923 |
| 14930979 | ---                                                                                      |              | <0.05 | -3.71068 |
| 15137552 | ---                                                                                      |              | <0.05 | -3.71257 |
| 15131817 | ---                                                                                      |              | <0.05 | -3.71279 |
| 14925017 | ---                                                                                      |              | <0.05 | -3.71781 |
| 14925551 | ---                                                                                      |              | <0.05 | -3.72291 |
| 14930555 | ---                                                                                      |              | <0.05 | -3.72291 |
| 15116146 | ---                                                                                      |              | <0.05 | -3.72658 |
| 14978877 | ---                                                                                      |              | <0.05 | -3.72893 |
| 15042280 | ENSECAT00000003915 // LOC100052921 // interferon-alpha-4 // --- // 100052921             | LOC100052921 | <0.05 | -3.7306  |
| 15045044 | ---                                                                                      |              | <0.05 | -3.73311 |
| 14931303 | ---                                                                                      |              | <0.05 | -3.73645 |
| 15002306 | ---                                                                                      |              | <0.05 | -3.7442  |
| 15008883 | ---                                                                                      |              | <0.05 | -3.74675 |
| 15136744 | ---                                                                                      |              | <0.05 | -3.74785 |
| 15120887 | XM_001491115 // ZNF704 // zinc finger protein 704 // --- // 100057981 /// ENSECAT0000000 | ZNF704       | <0.05 | -3.74862 |
| 15137024 | ---                                                                                      |              | <0.05 | -3.75097 |
| 14926785 | ---                                                                                      |              | <0.05 | -3.75354 |
| 15121968 | ---                                                                                      |              | <0.05 | -3.75649 |
| 15129944 | ---                                                                                      |              | <0.05 | -3.76219 |
| 15070503 | ---                                                                                      |              | <0.05 | -3.76908 |
| 15014322 | ---                                                                                      |              | <0.05 | -3.76951 |
| 15077216 | ---                                                                                      |              | <0.05 | -3.7697  |
| 15136888 | ---                                                                                      |              | <0.05 | -3.7697  |
| 15035255 | ---                                                                                      |              | <0.05 | -3.77471 |
| 15080146 | ---                                                                                      |              | <0.05 | -3.77839 |
| 15004546 | ---                                                                                      |              | <0.05 | -3.77969 |
| 14929187 | ---                                                                                      |              | <0.05 | -3.78482 |
| 15085001 | ---                                                                                      |              | <0.05 | -3.78878 |
| 14997560 | ---                                                                                      |              | <0.05 | -3.78958 |
| 15088038 | XM_001490827 // LOC100058159 // calponin-3-like // --- // 100058159 /// ENSECAT000000021 | LOC100058159 | <0.05 | -3.79526 |
| 15137292 | ---                                                                                      |              | <0.05 | -3.79576 |
| 15081631 | ---                                                                                      |              | <0.05 | -3.79646 |
| 14926185 | ---                                                                                      |              | <0.05 | -3.79855 |
| 14928979 | ---                                                                                      |              | <0.05 | -3.80392 |
| 15042909 | ---                                                                                      |              | <0.05 | -3.80417 |
| 15035797 | ---                                                                                      |              | <0.05 | -3.8056  |
| 15126568 | NM_001166082 // DEFA23 // Paneth cell-specific alpha-defensin 23 // --- // 100306995 //  | DEFA23       | <0.05 | -3.80625 |
| 15042175 | ---                                                                                      |              | <0.05 | -3.80836 |
| 15080592 | ---                                                                                      |              | <0.05 | -3.81437 |
| 14982055 | ---                                                                                      |              | <0.05 | -3.81531 |
| 15099877 | ---                                                                                      |              | <0.05 | -3.8262  |
| 15036665 | ---                                                                                      |              | <0.05 | -3.82629 |
| 15005580 | ---                                                                                      |              | <0.05 | -3.82742 |
| 15137030 | ---                                                                                      |              | <0.05 | -3.82993 |
| 15120342 | ---                                                                                      |              | <0.05 | -3.83093 |
| 14997530 | ---                                                                                      |              | <0.05 | -3.83105 |
| 14929775 | ---                                                                                      |              | <0.05 | -3.83329 |
| 15136764 | ---                                                                                      |              | <0.05 | -3.83545 |
| 14931453 | ---                                                                                      |              | <0.05 | -3.83779 |
| 15137210 | ---                                                                                      |              | <0.05 | -3.84064 |
| 15076505 | ---                                                                                      |              | <0.05 | -3.84546 |
| 15027352 | XM_001491116 // LOC100057985 // olfactory receptor 2B2-like // --- // 100057985 /// ENS  | LOC100057985 | <0.05 | -3.84678 |
| 15136448 | ---                                                                                      |              | <0.05 | -3.84703 |
| 15066169 | ---                                                                                      |              | <0.05 | -3.84718 |
| 15070410 | ---                                                                                      |              | <0.05 | -3.84783 |
| 15027007 | ---                                                                                      |              | <0.05 | -3.84815 |

|                                                                                                  |              |       |          |
|--------------------------------------------------------------------------------------------------|--------------|-------|----------|
| 15080135 ---                                                                                     |              | <0.05 | -3.8485  |
| 15123698 ---                                                                                     |              | <0.05 | -3.85143 |
| 15127708 ---                                                                                     |              | <0.05 | -3.85587 |
| 15136636 ---                                                                                     |              | <0.05 | -3.86036 |
| 14929123 ---                                                                                     |              | <0.05 | -3.86347 |
| 14926577 ---                                                                                     |              | <0.05 | -3.86794 |
| 14939854 ---                                                                                     |              | <0.05 | -3.87086 |
| 14941433 ---                                                                                     |              | <0.05 | -3.87819 |
| 15136972 ---                                                                                     |              | <0.05 | -3.87929 |
| 14939278 ---                                                                                     |              | <0.05 | -3.88008 |
| 15136382 ---                                                                                     |              | <0.05 | -3.88679 |
| 15137518 ---                                                                                     |              | <0.05 | -3.89693 |
| 15077850 ---                                                                                     |              | <0.05 | -3.89957 |
| 15081053 ---                                                                                     |              | <0.05 | -3.90036 |
| 14942985 ---                                                                                     |              | <0.05 | -3.9044  |
| 15104339 ---                                                                                     |              | <0.05 | -3.90609 |
| 15085246 XM_001488889 // LOC100053960 // basic leucine zipper transcriptional factor ATF-like 3- | LOC100053960 | <0.05 | -3.90641 |
| 15136648 ---                                                                                     |              | <0.05 | -3.90668 |
| 15102523 ENSECAT00000011459 // LOC100051089 // olfactory receptor 6C4-like // --- // 100051089 / | LOC100051089 | <0.05 | -3.9081  |
| 15119210 ENSECAT00000011590 // TMEM200C // transmembrane protein 200C // --- // ---              | TMEM200C     | <0.05 | -3.91143 |
| 15119740 ENSECAT00000006598 // ZNF521 // zinc finger protein 521 // --- // 100063937 // XM_0014  | ZNF521       | <0.05 | -3.91463 |
| 15020740 ---                                                                                     |              | <0.05 | -3.91875 |
| 14956426 ---                                                                                     |              | <0.05 | -3.91946 |
| 15121507 ---                                                                                     |              | <0.05 | -3.92695 |
| 15120563 ---                                                                                     |              | <0.05 | -3.92746 |
| 14931089 ---                                                                                     |              | <0.05 | -3.92945 |
| 14972768 ---                                                                                     |              | <0.05 | -3.93131 |
| 14935368 ---                                                                                     |              | <0.05 | -3.93359 |
| 14952887 XM_001502677 // DSE // dermatan sulfate epimerase // --- // 100072666 // ENSECAT000000  | DSE          | <0.05 | -3.93468 |
| 15131935 ---                                                                                     |              | <0.05 | -3.93632 |
| 14931377 ---                                                                                     |              | <0.05 | -3.93708 |
| 14956283 ---                                                                                     |              | <0.05 | -3.93907 |
| 15137020 ---                                                                                     |              | <0.05 | -3.93908 |
| 14927191 ---                                                                                     |              | <0.05 | -3.94116 |
| 15048660 ---                                                                                     |              | <0.05 | -3.95001 |
| 14927245 ---                                                                                     |              | <0.05 | -3.95162 |
| 14953572 ---                                                                                     |              | <0.05 | -3.95849 |
| 15137602 ---                                                                                     |              | <0.05 | -3.95849 |
| 14931341 ---                                                                                     |              | <0.05 | -3.96256 |
| 15127526 ---                                                                                     |              | <0.05 | -3.9631  |
| 15137504 ---                                                                                     |              | <0.05 | -3.96393 |
| 14970224 XM_001493378 // LOC100061443 // membrane-spanning 4-domains subfamily A member 7-like / | LOC100061443 | <0.05 | -3.96487 |
| 14952175 ---                                                                                     |              | <0.05 | -3.96564 |
| 15064478 ---                                                                                     |              | <0.05 | -3.96691 |
| 15137704 ---                                                                                     |              | <0.05 | -3.97516 |
| 15120491 ---                                                                                     |              | <0.05 | -3.9789  |
| 14984936 ---                                                                                     |              | <0.05 | -3.97909 |
| 14988575 ---                                                                                     |              | <0.05 | -3.98533 |
| 14928927 ---                                                                                     |              | <0.05 | -3.98927 |
| 14927531 ---                                                                                     |              | <0.05 | -3.99901 |
| 14928937 ---                                                                                     |              | <0.05 | -4.00209 |
| 15136194 ---                                                                                     |              | <0.05 | -4.00748 |
| 15077385 ---                                                                                     |              | <0.05 | -4.00884 |
| 15008823 ---                                                                                     |              | <0.05 | -4.00965 |
| 15046104 ---                                                                                     |              | <0.05 | -4.01159 |
| 14935793 ---                                                                                     |              | <0.05 | -4.01269 |
| 15039350 ---                                                                                     |              | <0.05 | -4.01755 |
| 15061962 ---                                                                                     |              | <0.05 | -4.02415 |
| 15030475 XM_001491016 // LOC100055430 // radiation-inducible immediate-early gene IEX-1-like //  | LOC100055430 | <0.05 | -4.03442 |
| 15136542 ---                                                                                     |              | <0.05 | -4.03717 |
| 14955446 ---                                                                                     |              | <0.05 | -4.0377  |
| 15028957 ---                                                                                     |              | <0.05 | -4.03861 |
| 14932293 ---                                                                                     |              | <0.05 | -4.04053 |
| 15136266 ---                                                                                     |              | <0.05 | -4.04257 |
| 15122097 ---                                                                                     |              | <0.05 | -4.04729 |
| 15083053 ---                                                                                     |              | <0.05 | -4.04829 |
| 14930415 ---                                                                                     |              | <0.05 | -4.0532  |
| 15137788 ---                                                                                     |              | <0.05 | -4.05761 |
| 15058238 ---                                                                                     |              | <0.05 | -4.05975 |
| 15046136 NR_033035 // MIR494 // microRNA mir-494 // --- // 100314915                             | MIR494       | <0.05 | -4.06032 |
| 15112046 ENSECAT00000010476 // IL18BP // interleukin 18 binding protein // --- // ---            | IL18BP       | <0.05 | -4.0643  |
| 14944152 ---                                                                                     |              | <0.05 | -4.06446 |
| 15053717 ---                                                                                     |              | <0.05 | -4.0714  |
| 14952388 ---                                                                                     |              | <0.05 | -4.07195 |
| 14930459 ---                                                                                     |              | <0.05 | -4.07774 |
| 15136866 ---                                                                                     |              | <0.05 | -4.08715 |
| 15014998 ---                                                                                     |              | <0.05 | -4.08757 |
| 15063620 ---                                                                                     |              | <0.05 | -4.09083 |
| 15052916 NM_001081935 // PTGES // prostaglandin E synthase // --- // 100034143 // ENSECAT000000  | PTGES        | <0.05 | -4.09716 |
| 15035455 NM_001081811 // FST // follistatin // --- // 100033825 // ENSECAT00000019030 // FST //  | FST          | <0.05 | -4.09828 |
| 15003720 ---                                                                                     |              | <0.05 | -4.10276 |
| 15137412 ---                                                                                     |              | <0.05 | -4.10619 |
| 14956148 ---                                                                                     |              | <0.05 | -4.1094  |
| 15132723 ---                                                                                     |              | <0.05 | -4.12227 |
| 14970502 ---                                                                                     |              | <0.05 | -4.12666 |
| 15107842 XM_001501248 // PARVA // parvin, alpha // --- // 100071481 // ENSECAT00000006448 // PA  | PARVA        | <0.05 | -4.12741 |
| 14988786 ---                                                                                     |              | <0.05 | -4.12763 |
| 14937744 ---                                                                                     |              | <0.05 | -4.12803 |
| 15048278 XM_001490956 // LOC100055201 // creatine kinase B-type-like // --- // 100055201 // ENS  | LOC100055201 | <0.05 | -4.12949 |
| 14945516 ---                                                                                     |              | <0.05 | -4.13638 |
| 14928001 ---                                                                                     |              | <0.05 | -4.14284 |
| 15137218 ---                                                                                     |              | <0.05 | -4.14319 |
| 15056194 ---                                                                                     |              | <0.05 | -4.1505  |
| 15071075 AF053497 // CXCL1 // chemokine (C-X-C motif) ligand 1 (melanoma growth stimulating acti | CXCL1        | <0.05 | -4.15208 |
| 14986323 ---                                                                                     |              | <0.05 | -4.15927 |
| 14925437 ---                                                                                     |              | <0.05 | -4.1595  |
| 15137178 ---                                                                                     |              | <0.05 | -4.16197 |
| 14966873 XM_001503888 // LOC100057859 // c-C motif chemokine 4-like // --- // 100057859 // ENSE  | LOC100057859 | <0.05 | -4.16363 |
| 15068034 XM_001498741 // LOC100068923 // fibroblast growth factor-binding protein 1-like // ---  | LOC100068923 | <0.05 | -4.16493 |
| 15036481 ---                                                                                     |              | <0.05 | -4.16686 |
| 15137690 ---                                                                                     |              | <0.05 | -4.1669  |
| 14990285 ---                                                                                     |              | <0.05 | -4.18148 |
| 14940553 ---                                                                                     |              | <0.05 | -4.18533 |
| 15073271 ---                                                                                     |              | <0.05 | -4.18933 |
| 15131806 ---                                                                                     |              | <0.05 | -4.18984 |
| 15129810 ---                                                                                     |              | <0.05 | -4.19401 |

|                                                                                                  |              |       |          |
|--------------------------------------------------------------------------------------------------|--------------|-------|----------|
| 15137334 ---                                                                                     |              | <0.05 | -4.19401 |
| 15076887 ---                                                                                     |              | <0.05 | -4.20215 |
| 14989359 ---                                                                                     |              | <0.05 | -4.20386 |
| 14940367 NM_001081881 // GZMB // granzyme B (granzyme 2, cytotoxic T-lymphocyte-associated serin | GZMB         | <0.05 | -4.20873 |
| 15137212 ---                                                                                     |              | <0.05 | -4.21335 |
| 14984285 ---                                                                                     |              | <0.05 | -4.21444 |
| 14927521 ---                                                                                     |              | <0.05 | -4.21587 |
| 15137454 ---                                                                                     |              | <0.05 | -4.22071 |
| 15062256 ---                                                                                     |              | <0.05 | -4.22496 |
| 14988897 ---                                                                                     |              | <0.05 | -4.22674 |
| 15001444 ---                                                                                     |              | <0.05 | -4.22738 |
| 14931459 ---                                                                                     |              | <0.05 | -4.2293  |
| 15026967 ---                                                                                     |              | <0.05 | -4.2298  |
| 15121477 ---                                                                                     |              | <0.05 | -4.23544 |
| 14991419 ---                                                                                     |              | <0.05 | -4.23867 |
| 15111672 ---                                                                                     |              | <0.05 | -4.24566 |
| 15029936 ---                                                                                     |              | <0.05 | -4.24611 |
| 15136190 ---                                                                                     |              | <0.05 | -4.25044 |
| 15076437 ---                                                                                     |              | <0.05 | -4.25124 |
| 15089793 ---                                                                                     |              | <0.05 | -4.25182 |
| 15055911 ---                                                                                     |              | <0.05 | -4.25734 |
| 14992068 ---                                                                                     |              | <0.05 | -4.2574  |
| 15026564 ---                                                                                     |              | <0.05 | -4.274   |
| 14970132 XM_001497902 // LOC100067995 // olfactory receptor 1020-like // --- // 100067995 /// EN | LOC100067995 | <0.05 | -4.276   |
| 14927523 ---                                                                                     |              | <0.05 | -4.28567 |
| 14945686 ---                                                                                     |              | <0.05 | -4.28954 |
| 14939552 ---                                                                                     |              | <0.05 | -4.28965 |
| 14954457 NM_001163881 // PLAUR // plasminogen activator, urokinase receptor // --- // 100033904  | PLAUR        | <0.05 | -4.28993 |
| 14988570 ---                                                                                     |              | <0.05 | -4.29126 |
| 15024953 NM_001081944 // CLU // clusterin // --- // 100034172 /// ENSECAT00000007460 // CLU // c | CLU          | <0.05 | -4.30148 |
| 14992854 ---                                                                                     |              | <0.05 | -4.30794 |
| 15051462 ---                                                                                     |              | <0.05 | -4.31051 |
| 15011423 ---                                                                                     |              | <0.05 | -4.31769 |
| 15056886 ---                                                                                     |              | <0.05 | -4.31899 |
| 14925113 ---                                                                                     |              | <0.05 | -4.31987 |
| 14990270 ---                                                                                     |              | <0.05 | -4.32091 |
| 15126656 ---                                                                                     |              | <0.05 | -4.32445 |
| 14998430 ---                                                                                     |              | <0.05 | -4.34119 |
| 15137188 ---                                                                                     |              | <0.05 | -4.34453 |
| 14931753 ---                                                                                     |              | <0.05 | -4.35228 |
| 15056500 XM_001493010 // LOC100060890 // vascular endothelial growth factor C-like // --- // 100 | LOC100060890 | <0.05 | -4.37015 |
| 14994411 ---                                                                                     |              | <0.05 | -4.37099 |
| 15007899 ENSECAT00000019906 // MYO1B // myosin IB // --- // 100054744                            | MYO1B        | <0.05 | -4.37723 |
| 15056893 ---                                                                                     |              | <0.05 | -4.37891 |
| 15136834 ---                                                                                     |              | <0.05 | -4.38147 |
| 14927443 ---                                                                                     |              | <0.05 | -4.38152 |
| 14927567 ---                                                                                     |              | <0.05 | -4.38416 |
| 14994605 XM_001503611 // LOC100057240 // DNA-binding protein inhibitor ID-2-like // --- // 10005 | LOC100057240 | <0.05 | -4.39176 |
| 14928045 ---                                                                                     |              | <0.05 | -4.39589 |
| 15117492 ---                                                                                     |              | <0.05 | -4.3959  |
| 14927613 ---                                                                                     |              | <0.05 | -4.39679 |
| 15066673 ---                                                                                     |              | <0.05 | -4.39876 |
| 15119796 ---                                                                                     |              | <0.05 | -4.40448 |
| 15057642 ---                                                                                     |              | <0.05 | -4.41161 |
| 15033990 ---                                                                                     |              | <0.05 | -4.41256 |
| 15013467 ---                                                                                     |              | <0.05 | -4.42548 |
| 15136692 ---                                                                                     |              | <0.05 | -4.42549 |
| 14927515 ---                                                                                     |              | <0.05 | -4.42571 |
| 15137246 ---                                                                                     |              | <0.05 | -4.42656 |
| 15099667 ---                                                                                     |              | <0.05 | -4.42803 |
| 15066109 ---                                                                                     |              | <0.05 | -4.43041 |
| 14932541 ---                                                                                     |              | <0.05 | -4.436   |
| 15137748 ---                                                                                     |              | <0.05 | -4.4374  |
| 14942983 ---                                                                                     |              | <0.05 | -4.43819 |
| 15042650 ---                                                                                     |              | <0.05 | -4.44487 |
| 14928065 ---                                                                                     |              | <0.05 | -4.45231 |
| 15105576 ---                                                                                     |              | <0.05 | -4.45459 |
| 15011492 ---                                                                                     |              | <0.05 | -4.45522 |
| 15128897 ---                                                                                     |              | <0.05 | -4.45868 |
| 14956178 ---                                                                                     |              | <0.05 | -4.45934 |
| 15132756 ---                                                                                     |              | <0.05 | -4.46079 |
| 14957391 ---                                                                                     |              | <0.05 | -4.4665  |
| 15137630 ---                                                                                     |              | <0.05 | -4.4665  |
| 15030959 ENSECAT00000017521 // C6orf10 // chromosome 6 open reading frame 10 // --- // ---       | C6orf10      | <0.05 | -4.47101 |
| 15002919 ---                                                                                     |              | <0.05 | -4.47488 |
| 15003751 ---                                                                                     |              | <0.05 | -4.48663 |
| 15077408 ---                                                                                     |              | <0.05 | -4.49074 |
| 15028951 ---                                                                                     |              | <0.05 | -4.49283 |
| 15005441 ---                                                                                     |              | <0.05 | -4.49472 |
| 14953798 ---                                                                                     |              | <0.05 | -4.50007 |
| 15073176 XM_001488715 // LBR // lamin B receptor // --- // 100056997 /// ENSECAT00000011831 // L | LBR          | <0.05 | -4.50411 |
| 14959177 ---                                                                                     |              | <0.05 | -4.50961 |
| 14987159 ---                                                                                     |              | <0.05 | -4.51084 |
| 15008619 ---                                                                                     |              | <0.05 | -4.51229 |
| 14998512 ENSECAT00000008123 // MED12L // mediator complex subunit 12-like // --- // 100056881 // | MED12L       | <0.05 | -4.51265 |
| 15136590 ---                                                                                     |              | <0.05 | -4.51285 |
| 15105959 ---                                                                                     |              | <0.05 | -4.52311 |
| 15129982 ---                                                                                     |              | <0.05 | -4.52772 |
| 14927507 ---                                                                                     |              | <0.05 | -4.52855 |
| 15059632 ---                                                                                     |              | <0.05 | -4.52863 |
| 15075351 ---                                                                                     |              | <0.05 | -4.53691 |
| 15006329 ---                                                                                     |              | <0.05 | -4.53932 |
| 15124232 ---                                                                                     |              | <0.05 | -4.55372 |
| 15136806 ---                                                                                     |              | <0.05 | -4.5538  |
| 15004607 ENSECAT00000023490 // FLT1 // fms-related tyrosine kinase 1 (vascular endothelial growt | FLT1         | <0.05 | -4.56243 |
| 14945400 ---                                                                                     |              | <0.05 | -4.56591 |
| 15020483 ---                                                                                     |              | <0.05 | -4.56753 |
| 15137696 ---                                                                                     |              | <0.05 | -4.57697 |
| 14945210 ---                                                                                     |              | <0.05 | -4.57799 |
| 15103922 ---                                                                                     |              | <0.05 | -4.58088 |
| 14926941 ---                                                                                     |              | <0.05 | -4.58235 |
| 15032457 ---                                                                                     |              | <0.05 | -4.59069 |
| 15136582 ---                                                                                     |              | <0.05 | -4.59069 |
| 15110136 XM_001501513 // CLMP // CXADR-like membrane protein // --- // 100071682 /// ENSECAT0000 | CLMP         | <0.05 | -4.59598 |
| 15005713 ---                                                                                     |              | <0.05 | -4.59903 |
| 14973179 ---                                                                                     |              | <0.05 | -4.59948 |



|                                                                                                   |              |          |
|---------------------------------------------------------------------------------------------------|--------------|----------|
| 14969948 ---                                                                                      | <0.05        | -4.61301 |
| 14927527 ---                                                                                      | <0.05        | -4.61364 |
| 15056485 ---                                                                                      | <0.05        | -4.6254  |
| 14926253 ---                                                                                      | <0.05        | -4.63524 |
| 15067037 ---                                                                                      | <0.05        | -4.64013 |
| 15013644 ---                                                                                      | <0.05        | -4.64015 |
| 15008048 ---                                                                                      | <0.05        | -4.64453 |
| 15115932 ---                                                                                      | <0.05        | -4.64933 |
| 14925487 ---                                                                                      | <0.05        | -4.65257 |
| 15122273 ---                                                                                      | <0.05        | -4.65423 |
| 14927499 ---                                                                                      | <0.05        | -4.65727 |
| 15048970 ---                                                                                      | <0.05        | -4.65865 |
| 15136684 ---                                                                                      | <0.05        | -4.65865 |
| 15053786 ---                                                                                      | <0.05        | -4.66343 |
| 15098543 ENSECAT00000015236 // TNP1 // transition protein 1 (during histone to protamine replace) | <0.05        | -4.69416 |
| 15100755 ---                                                                                      | <0.05        | -4.69607 |
| 14932285 ---                                                                                      | <0.05        | -4.70084 |
| 15137692 ---                                                                                      | <0.05        | -4.70966 |
| 14986414 ---                                                                                      | <0.05        | -4.71068 |
| 15137714 ---                                                                                      | <0.05        | -4.71365 |
| 15013649 ---                                                                                      | <0.05        | -4.72129 |
| 15131804 ---                                                                                      | <0.05        | -4.72816 |
| 14945265 ---                                                                                      | <0.05        | -4.72845 |
| 15070406 ---                                                                                      | <0.05        | -4.73068 |
| 14925125 ---                                                                                      | <0.05        | -4.73134 |
| 15062489 XM_001498585 // LOC100056470 // uncharacterized LOC100056470 // --- // 100056470 /// EN  | LOC100056470 | <0.05    |
| 15137634 ---                                                                                      | <0.05        | -4.73308 |
| 15137194 ---                                                                                      | <0.05        | -4.73519 |
| 15137194 ---                                                                                      | <0.05        | -4.73828 |
| 15020907 ENSECAT00000011304 // LOC100072294 // TNFAIP3-interacting protein 3-like // --- // 1000  | LOC100072294 | <0.05    |
| 15123622 ---                                                                                      | <0.05        | -4.74042 |
| 15035987 XM_001501124 // LOC100069914 // brain acid soluble protein 1-like // --- // 100069914 /  | LOC100069914 | <0.05    |
| 14994319 ---                                                                                      | <0.05        | -4.74859 |
| 15137294 ---                                                                                      | <0.05        | -4.75394 |
| 15130284 ---                                                                                      | <0.05        | -4.75473 |
| 14992029 ---                                                                                      | <0.05        | -4.76081 |
| 15056775 ---                                                                                      | <0.05        | -4.76299 |
| 14935721 ---                                                                                      | <0.05        | -4.77017 |
| 14933059 ---                                                                                      | <0.05        | -4.77214 |
| 14926219 ---                                                                                      | <0.05        | -4.77644 |
| 15019731 ---                                                                                      | <0.05        | -4.78525 |
| 15128814 ---                                                                                      | <0.05        | -4.7927  |
| 14928955 ---                                                                                      | <0.05        | -4.79381 |
| 15136236 ---                                                                                      | <0.05        | -4.80113 |
| 14948376 XM_001489335 // LOC100051088 // dehydrogenase/reductase SDR family member 1-like // ---  | LOC100051088 | <0.05    |
| 14940573 ---                                                                                      | <0.05        | -4.80498 |
| 15091917 ---                                                                                      | <0.05        | -4.80646 |
| 15118658 ---                                                                                      | <0.05        | -4.81395 |
| 15046034 ---                                                                                      | <0.05        | -4.82222 |
| 14930905 ---                                                                                      | <0.05        | -4.82496 |
| 14989037 ---                                                                                      | <0.05        | -4.83934 |
| 15004737 ---                                                                                      | <0.05        | -4.84315 |
| 14931221 ---                                                                                      | <0.05        | -4.84845 |
| 15028949 ---                                                                                      | <0.05        | -4.85358 |
| 15126669 ---                                                                                      | <0.05        | -4.85634 |
| 15126670 ---                                                                                      | <0.05        | -4.86139 |
| 15041530 ---                                                                                      | <0.05        | -4.86198 |
| 14927917 ---                                                                                      | <0.05        | -4.86198 |
| 15133149 ---                                                                                      | <0.05        | -4.86365 |
| 14983339 ---                                                                                      | <0.05        | -4.86666 |
| 14992346 ---                                                                                      | <0.05        | -4.87629 |
| 15080015 ---                                                                                      | <0.05        | -4.87687 |
| 15077271 ---                                                                                      | <0.05        | -4.87687 |
| 15084659 ---                                                                                      | <0.05        | -4.88167 |
| 15076165 ---                                                                                      | <0.05        | -4.88217 |
| 14940656 ---                                                                                      | <0.05        | -4.88297 |
| 15021256 ---                                                                                      | <0.05        | -4.88912 |
| 15135584 ---                                                                                      | <0.05        | -4.89051 |
| 15057170 ---                                                                                      | <0.05        | -4.90513 |
| 14986495 ---                                                                                      | <0.05        | -4.9054  |
| 15078434 NM_001114143 // CAV1 // caveolin 1, caveolae protein, 22kDa // --- // 100055975 /// ENS  | CAV1         | <0.05    |
| 14974450 ---                                                                                      | <0.05        | -4.90741 |
| 15034400 ---                                                                                      | <0.05        | -4.91171 |
| 15123769 ---                                                                                      | <0.05        | -4.91692 |
| 14941508 ---                                                                                      | <0.05        | -4.91789 |
| 14930301 ---                                                                                      | <0.05        | -4.92125 |
| 14970514 ---                                                                                      | <0.05        | -4.92366 |
| 15136732 ---                                                                                      | <0.05        | -4.92386 |
| 15012315 ---                                                                                      | <0.05        | -4.92611 |
| 14959489 ---                                                                                      | <0.05        | -4.93098 |
| 14943913 ---                                                                                      | <0.05        | -4.93957 |
| 14967860 XM_001918357 // LOC100072577 // olfactory receptor 1A1-like // --- // 100072577 /// ENS  | LOC100072577 | <0.05    |
| 15029663 ---                                                                                      | <0.05        | -4.94845 |
| 15137352 ---                                                                                      | <0.05        | -4.94845 |
| 14952258 ---                                                                                      | <0.05        | -4.95136 |
| 14929067 ---                                                                                      | <0.05        | -4.95209 |
| 14929503 ---                                                                                      | <0.05        | -4.95447 |
| 14963451 ---                                                                                      | <0.05        | -4.95447 |
| 15001979 ---                                                                                      | <0.05        | -4.96362 |
| 15131335 ---                                                                                      | <0.05        | -4.9667  |
| 15111670 ---                                                                                      | <0.05        | -4.96793 |
| 15137112 ---                                                                                      | <0.05        | -4.98302 |
| 15027133 ENSECAT00000006961 // LOC100053545 // histone H2A type 1-C-like // --- // 100053545      | LOC100053545 | <0.05    |
| 15008655 ---                                                                                      | <0.05        | -4.98346 |
| 15078051 ---                                                                                      | <0.05        | -4.98486 |
| 14982991 ---                                                                                      | <0.05        | -4.98486 |
| 15132687 ENSECAT00000013894 // LOC100067023 // transcription elongation factor A protein-like 4-  | LOC100067023 | <0.05    |
| 15066864 ENSECAT000000020789 // LOC100055761 // ras association domain-containing protein 6-like  | LOC100055761 | <0.05    |
| 15126921 ---                                                                                      | <0.05        | -5.00193 |
| 15136338 ---                                                                                      | <0.05        | -5.01542 |
| 15007935 ---                                                                                      | <0.05        | -5.01557 |
| 15007591 ---                                                                                      | <0.05        | -5.0161  |
| 15004988 ---                                                                                      | <0.05        | -5.01767 |
| 15071285 ---                                                                                      | <0.05        | -5.03334 |
| 15001471 ---                                                                                      | <0.05        | -5.04086 |
| 14947032 ---                                                                                      | <0.05        | -5.04172 |
| 15107741 XM_001504918 // AMPD3 // adenosine monophosphate deaminase 3 // --- // 100055812 /// EN  | AMPD3        | <0.05    |
| 15001471 ---                                                                                      | <0.05        | -5.05896 |
| 14947032 ---                                                                                      | <0.05        | -5.06403 |
| 15107741 XM_001504918 // AMPD3 // adenosine monophosphate deaminase 3 // --- // 100055812 /// EN  | AMPD3        | <0.05    |
| 15001471 ---                                                                                      | <0.05        | -5.06449 |
| 15107741 XM_001504918 // AMPD3 // adenosine monophosphate deaminase 3 // --- // 100055812 /// EN  | AMPD3        | <0.05    |
| 15001471 ---                                                                                      | <0.05        | -5.07406 |

|          |                                                                                         |       |          |              |
|----------|-----------------------------------------------------------------------------------------|-------|----------|--------------|
| 14976733 | ---                                                                                     | <0.05 | -5.07407 |              |
| 15071762 | ---                                                                                     | <0.05 | -5.08674 |              |
| 14973186 | ---                                                                                     | <0.05 | -5.08692 |              |
| 14926807 | ---                                                                                     | <0.05 | -5.08894 |              |
| 15129209 | XM_001503086 // LOC100059264 // WW domain-binding protein 5-like // --- // 100059264 // | <0.05 | -5.10243 | LOC100059264 |
| 14931079 | ---                                                                                     | <0.05 | -5.12138 |              |
| 14926407 | ---                                                                                     | <0.05 | -5.13331 |              |
| 14926197 | ---                                                                                     | <0.05 | -5.14633 |              |
| 15003546 | ---                                                                                     | <0.05 | -5.14752 |              |
| 14927519 | ---                                                                                     | <0.05 | -5.16698 |              |
| 14937201 | ---                                                                                     | <0.05 | -5.16733 |              |
| 15002544 | ---                                                                                     | <0.05 | -5.1712  |              |
| 15137050 | ---                                                                                     | <0.05 | -5.17512 |              |
| 15136606 | ---                                                                                     | <0.05 | -5.17889 |              |
| 15014265 | ---                                                                                     | <0.05 | -5.1816  |              |
| 15036423 | XM_001488842 // CD93 // CD93 molecule // --- // 100059201 /// ENSECAT00000017144 // CD9 | <0.05 | -5.18585 | CD93         |
| 14934337 | ---                                                                                     | <0.05 | -5.19021 |              |
| 15136598 | ---                                                                                     | <0.05 | -5.20474 |              |
| 14946717 | ---                                                                                     | <0.05 | -5.20776 |              |
| 15132690 | ---                                                                                     | <0.05 | -5.20845 |              |
| 15064131 | ---                                                                                     | <0.05 | -5.21672 |              |
| 14990908 | ---                                                                                     | <0.05 | -5.21851 |              |
| 15015212 | ---                                                                                     | <0.05 | -5.22185 |              |
| 15034553 | ---                                                                                     | <0.05 | -5.22202 |              |
| 14931547 | ---                                                                                     | <0.05 | -5.23343 |              |
| 15016373 | ---                                                                                     | <0.05 | -5.23527 |              |
| 14984221 | XM_001918276 // LOC100146557 // olfactory receptor 2C3-like // --- // 100146557 /// ENS | <0.05 | -5.23911 | LOC100146557 |
| 15137738 | ---                                                                                     | <0.05 | -5.25668 |              |
| 14925101 | ---                                                                                     | <0.05 | -5.26282 |              |
| 15132104 | ---                                                                                     | <0.05 | -5.27472 |              |
| 14927533 | ---                                                                                     | <0.05 | -5.27555 |              |
| 15003565 | ---                                                                                     | <0.05 | -5.27653 |              |
| 15057838 | ---                                                                                     | <0.05 | -5.30154 |              |
| 15077156 | ---                                                                                     | <0.05 | -5.30297 |              |
| 15123788 | ---                                                                                     | <0.05 | -5.30858 |              |
| 15123677 | ---                                                                                     | <0.05 | -5.30938 |              |
| 14927529 | ---                                                                                     | <0.05 | -5.31406 |              |
| 15074165 | ---                                                                                     | <0.05 | -5.32581 |              |
| 14989504 | ---                                                                                     | <0.05 | -5.32609 |              |
| 14992879 | ---                                                                                     | <0.05 | -5.33609 |              |
| 14945170 | XM_001490809 // CHSY1 // chondroitin sulfate synthase 1 // --- // 100057477 /// ENSECAT | <0.05 | -5.3364  | CHSY1        |
| 15002182 | ---                                                                                     | <0.05 | -5.3409  |              |
| 15084927 | ENSECAT00000025271 // LOC100055269 // laminin subunit gamma-1-like // --- // 100055269  | <0.05 | -5.3545  | LOC100055269 |
| 14948504 | ---                                                                                     | <0.05 | -5.35951 |              |
| 14928893 | ---                                                                                     | <0.05 | -5.36341 |              |
| 14954190 | ---                                                                                     | <0.05 | -5.37368 |              |
| 14927539 | ---                                                                                     | <0.05 | -5.37444 |              |
| 14958861 | XM_003362466 // LOC100630791 // CMRF35-like molecule 6-like // --- // 100630791 /// ENS | <0.05 | -5.38815 | LOC100630791 |
| 15120827 | ---                                                                                     | <0.05 | -5.40624 |              |
| 15013559 | ---                                                                                     | <0.05 | -5.4149  |              |
| 14927543 | ---                                                                                     | <0.05 | -5.41745 |              |
| 14928731 | ---                                                                                     | <0.05 | -5.41818 |              |
| 15111694 | ---                                                                                     | <0.05 | -5.42785 |              |
| 15111241 | ---                                                                                     | <0.05 | -5.43123 |              |
| 15033343 | ---                                                                                     | <0.05 | -5.43265 |              |
| 15136952 | ---                                                                                     | <0.05 | -5.43337 |              |
| 15106523 | ---                                                                                     | <0.05 | -5.43953 |              |
| 15116706 | ---                                                                                     | <0.05 | -5.46002 |              |
| 14927541 | ---                                                                                     | <0.05 | -5.4602  |              |
| 15011843 | ---                                                                                     | <0.05 | -5.46751 |              |
| 15110862 | ENSECAT00000023383 // LOC100064925 // zinc finger protein 709-like // --- // 100064925  | <0.05 | -5.47139 | LOC100064925 |
| 14931329 | ---                                                                                     | <0.05 | -5.48737 |              |
| 15119390 | ---                                                                                     | <0.05 | -5.49763 |              |
| 14927517 | ---                                                                                     | <0.05 | -5.50211 |              |
| 15136378 | ---                                                                                     | <0.05 | -5.50311 |              |
| 15137206 | ---                                                                                     | <0.05 | -5.52509 |              |
| 14930197 | ---                                                                                     | <0.05 | -5.5305  |              |
| 15054822 | ---                                                                                     | <0.05 | -5.54827 |              |
| 15136510 | ---                                                                                     | <0.05 | -5.55211 |              |
| 15137728 | ---                                                                                     | <0.05 | -5.5554  |              |
| 15053550 | ---                                                                                     | <0.05 | -5.56152 |              |
| 15132779 | ---                                                                                     | <0.05 | -5.56277 |              |
| 14926961 | ---                                                                                     | <0.05 | -5.56733 |              |
| 15039371 | ---                                                                                     | <0.05 | -5.57421 |              |
| 15054155 | ENSECAT00000012965 // PCP4 // Purkinje cell protein 4 // --- // ---                     | <0.05 | -5.58551 | PCP4         |
| 14990213 | ---                                                                                     | <0.05 | -5.58805 |              |
| 15136404 | ---                                                                                     | <0.05 | -5.60001 |              |
| 15066261 | ---                                                                                     | <0.05 | -5.61024 |              |
| 15009914 | ---                                                                                     | <0.05 | -5.61078 |              |
| 15136550 | ---                                                                                     | <0.05 | -5.61903 |              |
| 15136626 | ---                                                                                     | <0.05 | -5.6209  |              |
| 15067814 | ---                                                                                     | <0.05 | -5.63314 |              |
| 14931589 | ---                                                                                     | <0.05 | -5.64608 |              |
| 15089212 | ENSECAT00000009338 // IL10 // interleukin 10 // --- // 100034187 /// NM_001082490 // IL | <0.05 | -5.65616 | IL10         |
| 15137158 | ---                                                                                     | <0.05 | -5.65915 |              |
| 14999686 | ---                                                                                     | <0.05 | -5.65981 |              |
| 15137548 | ---                                                                                     | <0.05 | -5.66585 |              |
| 14927509 | ---                                                                                     | <0.05 | -5.67097 |              |
| 15130792 | ---                                                                                     | <0.05 | -5.67509 |              |
| 14927535 | ---                                                                                     | <0.05 | -5.67777 |              |
| 15136720 | ---                                                                                     | <0.05 | -5.68619 |              |
| 15094485 | ---                                                                                     | <0.05 | -5.69919 |              |
| 15071328 | ---                                                                                     | <0.05 | -5.7087  |              |
| 14943445 | ---                                                                                     | <0.05 | -5.71058 |              |
| 14968938 | ---                                                                                     | <0.05 | -5.71722 |              |
| 15128871 | ---                                                                                     | <0.05 | -5.71866 |              |
| 15132450 | ---                                                                                     | <0.05 | -5.71866 |              |
| 15137312 | ---                                                                                     | <0.05 | -5.71866 |              |
| 15137400 | ---                                                                                     | <0.05 | -5.71866 |              |
| 14939769 | ---                                                                                     | <0.05 | -5.73396 |              |
| 15026554 | ---                                                                                     | <0.05 | -5.74008 |              |
| 15081698 | ---                                                                                     | <0.05 | -5.74509 |              |
| 14984037 | ---                                                                                     | <0.05 | -5.75227 |              |
| 15136344 | ---                                                                                     | <0.05 | -5.79515 |              |
| 15067585 | ---                                                                                     | <0.05 | -5.80661 |              |
| 15093139 | XM_001495078 // CYR61 // cysteine-rich, angiogenic inducer, 61 // --- // 100064066 ///  | <0.05 | -5.80807 | CYR61        |

|                                                                                                  |              |       |          |
|--------------------------------------------------------------------------------------------------|--------------|-------|----------|
| 15058700 XM_001498399 // CHST11 // carbohydrate (chondroitin 4) sulfotransferase 11 // --- // 10 | CHST11       | <0.05 | -5.82959 |
| 15088545 ---                                                                                     |              | <0.05 | -5.83102 |
| 15079449 ---                                                                                     |              | <0.05 | -5.84968 |
| 14930185 ---                                                                                     |              | <0.05 | -5.85162 |
| 15136406 ---                                                                                     |              | <0.05 | -5.85401 |
| 15134014 ---                                                                                     |              | <0.05 | -5.86054 |
| 15131126 ---                                                                                     |              | <0.05 | -5.86659 |
| 15089956 ---                                                                                     |              | <0.05 | -5.88124 |
| 15136658 ---                                                                                     |              | <0.05 | -5.88241 |
| 15137786 ---                                                                                     |              | <0.05 | -5.88362 |
| 15003013 ---                                                                                     |              | <0.05 | -5.88365 |
| 15081065 ---                                                                                     |              | <0.05 | -5.89157 |
| 14927595 ---                                                                                     |              | <0.05 | -5.89496 |
| 14942909 XM_001501590 // PAPSS2 // 3'-phosphoadenosine 5'-phosphosulfate synthase 2 // --- // 10 | PAPSS2       | <0.05 | -5.91165 |
| 14986586 ---                                                                                     |              | <0.05 | -5.92679 |
| 15082556 ---                                                                                     |              | <0.05 | -5.92829 |
| 14937807 ENSECAT00000026465 // MYO1E // myosin IE // --- // 100068162                            | MYO1E        | <0.05 | -5.92866 |
| 15043747 NM_001114537 // IFN-ALPHA2 // interferon-alpha-2 // --- // 100052818 /// NM_001114538 / | IFN-ALPHA2   | <0.05 | -5.93653 |
| 14969018 ---                                                                                     |              | <0.05 | -5.94463 |
| 15121419 ---                                                                                     |              | <0.05 | -5.95402 |
| 15121600 ---                                                                                     |              | <0.05 | -5.96532 |
| 14931313 ---                                                                                     |              | <0.05 | -5.97878 |
| 15066646 ENSECAT00000019611 // ANTXR2 // anthrax toxin receptor 2 // --- // 100051770 /// XM_001 | ANTXR2       | <0.05 | -5.97954 |
| 15137648 ---                                                                                     |              | <0.05 | -5.98308 |
| 14926971 ---                                                                                     |              | <0.05 | -5.98355 |
| 14978976 ---                                                                                     |              | <0.05 | -5.98843 |
| 15054765 ---                                                                                     |              | <0.05 | -5.99531 |
| 15079594 XM_001490685 // LOC100057296 // olfactory receptor-like protein OLF3-like // --- // 100 | LOC100057296 | <0.05 | -6.00117 |
| 14969944 ---                                                                                     |              | <0.05 | -6.01385 |
| 15055909 ---                                                                                     |              | <0.05 | -6.01458 |
| 14948604 ---                                                                                     |              | <0.05 | -6.01637 |
| 14940044 XM_001918317 // LOC100056663 // olfactory receptor 6C4-like // --- // 100056663 /// ENS | LOC100056663 | <0.05 | -6.02666 |
| 15137250 ---                                                                                     |              | <0.05 | -6.02685 |
| 14926243 ---                                                                                     |              | <0.05 | -6.04122 |
| 14927525 ---                                                                                     |              | <0.05 | -6.05089 |
| 14993140 ---                                                                                     |              | <0.05 | -6.0573  |
| 15069817 ---                                                                                     |              | <0.05 | -6.06903 |
| 15015559 ---                                                                                     |              | <0.05 | -6.07401 |
| 15029606 XM_001491438 // LOC100058493 // PX domain-containing protein C6orf145-like // --- // 10 | LOC100058493 | <0.05 | -6.0786  |
| 14931385 ---                                                                                     |              | <0.05 | -6.09084 |
| 14992003 NM_001082526 // IL1B // interleukin 1, beta // --- // 100034237 /// ENSECAT00000000066  | IL1B         | <0.05 | -6.09512 |
| 14927513 ---                                                                                     |              | <0.05 | -6.09991 |
| 14954222 ---                                                                                     |              | <0.05 | -6.10197 |
| 14947112 ---                                                                                     |              | <0.05 | -6.13064 |
| 15071077 FJ469975 // MIP-2BETA // CXCL3 // --- // 100056258 /// NM_001143793 // MIP-2BETA // CXC | MIP-2BETA    | <0.05 | -6.14035 |
| 15012291 NR_032968 // MIR28 // microRNA mir-28 // --- // 100314878                               | MIR28        | <0.05 | -6.14595 |
| 15043178 ---                                                                                     |              | <0.05 | -6.14681 |
| 15136652 ---                                                                                     |              | <0.05 | -6.14681 |
| 15107872 ---                                                                                     |              | <0.05 | -6.16222 |
| 15136938 ---                                                                                     |              | <0.05 | -6.16914 |
| 15005366 ---                                                                                     |              | <0.05 | -6.17363 |
| 14934233 ---                                                                                     |              | <0.05 | -6.17742 |
| 15136274 ---                                                                                     |              | <0.05 | -6.19053 |
| 14939871 ---                                                                                     |              | <0.05 | -6.19453 |
| 14941961 ---                                                                                     |              | <0.05 | -6.20249 |
| 15084211 ---                                                                                     |              | <0.05 | -6.20669 |
| 15136752 ---                                                                                     |              | <0.05 | -6.21503 |
| 14927549 ---                                                                                     |              | <0.05 | -6.22139 |
| 15077707 ---                                                                                     |              | <0.05 | -6.23102 |
| 14928975 ---                                                                                     |              | <0.05 | -6.23322 |
| 14927511 ---                                                                                     |              | <0.05 | -6.23367 |
| 14927505 ---                                                                                     |              | <0.05 | -6.24232 |
| 15032076 XM_001503079 // LOC100056506 // glutathione S-transferase A2-like // --- // 100056506 / | LOC100056506 | <0.05 | -6.24982 |
| 15137172 ---                                                                                     |              | <0.05 | -6.25677 |
| 15019280 ENSECAT00000021228 // LOC100066167 // tumor necrosis factor receptor superfamily member | LOC100066167 | <0.05 | -6.26861 |
| 15134630 ---                                                                                     |              | <0.05 | -6.2859  |
| 14927501 ---                                                                                     |              | <0.05 | -6.28809 |
| 15053638 ---                                                                                     |              | <0.05 | -6.28926 |
| 15070948 ---                                                                                     |              | <0.05 | -6.30507 |
| 15110909 ---                                                                                     |              | <0.05 | -6.30629 |
| 15009366 ---                                                                                     |              | <0.05 | -6.31143 |
| 15059084 XM_001499732 // LOC100070048 // ER lumen protein retaining receptor 3-like // --- // 10 | LOC100070048 | <0.05 | -6.32099 |
| 15064310 ENSECAT00000019145 // LOC100062332 // c-C motif chemokine 22-like // --- // 100062332 / | LOC100062332 | <0.05 | -6.33783 |
| 15132480 ---                                                                                     |              | <0.05 | -6.34234 |
| 14947540 ---                                                                                     |              | <0.05 | -6.34468 |
| 14936833 ---                                                                                     |              | <0.05 | -6.34575 |
| 15109260 ---                                                                                     |              | <0.05 | -6.34753 |
| 15137008 ---                                                                                     |              | <0.05 | -6.36544 |
| 15098338 ---                                                                                     |              | <0.05 | -6.3853  |
| 15098898 ---                                                                                     |              | <0.05 | -6.39657 |
| 14935733 ---                                                                                     |              | <0.05 | -6.40252 |
| 15132345 ---                                                                                     |              | <0.05 | -6.40439 |
| 15013222 ---                                                                                     |              | <0.05 | -6.40521 |
| 14927547 ---                                                                                     |              | <0.05 | -6.41914 |
| 15134011 ---                                                                                     |              | <0.05 | -6.4204  |
| 14988524 ENSECAT00000005750 // IL1RN // interleukin 1 receptor antagonist // --- // 100034236 // | IL1RN        | <0.05 | -6.43279 |
| 15101195 ---                                                                                     |              | <0.05 | -6.4395  |
| 15137418 ---                                                                                     |              | <0.05 | -6.46331 |
| 15123246 ---                                                                                     |              | <0.05 | -6.46568 |
| 15083236 ---                                                                                     |              | <0.05 | -6.47524 |
| 15023528 ---                                                                                     |              | <0.05 | -6.47739 |
| 15136984 ---                                                                                     |              | <0.05 | -6.49337 |
| 15137624 ---                                                                                     |              | <0.05 | -6.4972  |
| 15070334 ---                                                                                     |              | <0.05 | -6.52013 |
| 15131897 ---                                                                                     |              | <0.05 | -6.52857 |
| 15019357 ---                                                                                     |              | <0.05 | -6.5655  |
| 15137300 ---                                                                                     |              | <0.05 | -6.57263 |
| 14945404 ---                                                                                     |              | <0.05 | -6.57922 |
| 15046172 NR_033023 // MIR382 // microRNA mir-382 // --- // 100314908                             | MIR382       | <0.05 | -6.58466 |
| 14953384 ---                                                                                     |              | <0.05 | -6.5895  |
| 14926687 ---                                                                                     |              | <0.05 | -6.59268 |
| 15015538 ---                                                                                     |              | <0.05 | -6.60518 |
| 14927955 ---                                                                                     |              | <0.05 | -6.61888 |
| 14927495 ---                                                                                     |              | <0.05 | -6.64915 |
| 15033330 XM_001497065 // LOC100052185 // endothelial cell-specific molecule 1-like // --- // 100 | LOC100052185 | <0.05 | -6.65185 |
| 14991525 ENSECAT00000017645 // IL1R1 // interleukin 1 receptor, type 1 // --- // 100009699 /// N | IL1R1        | <0.05 | -6.66965 |

|                                                                                                  |              |       |          |
|--------------------------------------------------------------------------------------------------|--------------|-------|----------|
| 14956071 ---                                                                                     |              | <0.05 | -6.69332 |
| 15000429 ENSECAT00000018328 // LOC100053301 // t-cell leukemia translocation-altered gene protei | LOC100053301 | <0.05 | -6.70959 |
| 14931639 ---                                                                                     |              | <0.05 | -6.76582 |
| 15002374 ---                                                                                     |              | <0.05 | -6.78255 |
| 15059275 ---                                                                                     |              | <0.05 | -6.78748 |
| 15046132 NR_033010 // MIR329 // microRNA mir-329 // --- // 100314901                             | MIR329       | <0.05 | -6.80665 |
| 15137234 ---                                                                                     |              | <0.05 | -6.81641 |
| 14926189 ---                                                                                     |              | <0.05 | -6.81753 |
| 15131110 ---                                                                                     |              | <0.05 | -6.8634  |
| 15136850 ---                                                                                     |              | <0.05 | -6.87412 |
| 15081449 ---                                                                                     |              | <0.05 | -6.88661 |
| 14999842 ---                                                                                     |              | <0.05 | -6.89445 |
| 14956251 ---                                                                                     |              | <0.05 | -6.91141 |
| 15015570 ---                                                                                     |              | <0.05 | -6.91449 |
| 15136476 ---                                                                                     |              | <0.05 | -6.91449 |
| 14991175 ---                                                                                     |              | <0.05 | -6.91817 |
| 15071287 ---                                                                                     |              | <0.05 | -6.92516 |
| 15015289 ---                                                                                     |              | <0.05 | -6.93287 |
| 14927503 ---                                                                                     |              | <0.05 | -6.94437 |
| 15110894 ---                                                                                     |              | <0.05 | -6.95463 |
| 15024886 ---                                                                                     |              | <0.05 | -6.95559 |
| 14981809 ---                                                                                     |              | <0.05 | -6.95969 |
| 15137196 ---                                                                                     |              | <0.05 | -6.96458 |
| 14958183 NR_032909 // MIR338 // microRNA mir-338 // --- // 100315012                             | MIR338       | <0.05 | -6.97941 |
| 14950508 ---                                                                                     |              | <0.05 | -6.98681 |
| 15120979 ---                                                                                     |              | <0.05 | -7.00406 |
| 15137650 ---                                                                                     |              | <0.05 | -7.01243 |
| 14952585 ---                                                                                     |              | <0.05 | -7.03471 |
| 15001464 ---                                                                                     |              | <0.05 | -7.04883 |
| 15100783 ---                                                                                     |              | <0.05 | -7.04921 |
| 15130282 ---                                                                                     |              | <0.05 | -7.05112 |
| 15115811 ---                                                                                     |              | <0.05 | -7.08072 |
| 15067167 ---                                                                                     |              | <0.05 | -7.08562 |
| 15113767 ENSECAT00000015807 // LOC100629131 // leukemia inhibitory factor-like // --- // 1006291 | LOC100629131 | <0.05 | -7.09213 |
| 15110229 ---                                                                                     |              | <0.05 | -7.0946  |
| 15053784 ---                                                                                     |              | <0.05 | -7.09474 |
| 14927545 ---                                                                                     |              | <0.05 | -7.12278 |
| 14991995 ENSECAT00000025409 // IL1A // interleukin 1, alpha // --- // 100064969 // NM_001082500  | IL1A         | <0.05 | -7.12949 |
| 14991281 ---                                                                                     |              | <0.05 | -7.19739 |
| 15130220 ---                                                                                     |              | <0.05 | -7.20169 |
| 15137354 ---                                                                                     |              | <0.05 | -7.20169 |
| 15057383 ---                                                                                     |              | <0.05 | -7.21014 |
| 15003018 ---                                                                                     |              | <0.05 | -7.2422  |
| 15050950 ---                                                                                     |              | <0.05 | -7.2487  |
| 15136968 ---                                                                                     |              | <0.05 | -7.24962 |
| 14962039 ---                                                                                     |              | <0.05 | -7.26044 |
| 15113120 ---                                                                                     |              | <0.05 | -7.26169 |
| 15075607 ---                                                                                     |              | <0.05 | -7.27229 |
| 15011678 ---                                                                                     |              | <0.05 | -7.29305 |
| 14955890 ---                                                                                     |              | <0.05 | -7.29514 |
| 14999422 ---                                                                                     |              | <0.05 | -7.29968 |
| 15136272 ---                                                                                     |              | <0.05 | -7.29968 |
| 15106565 ---                                                                                     |              | <0.05 | -7.32782 |
| 15122518 ---                                                                                     |              | <0.05 | -7.33957 |
| 15060222 NM_001081925 // DCN // decorin // --- // 100034120 // ENSECAT00000021671 // DCN // dec  | DCN          | <0.05 | -7.34295 |
| 14969417 ---                                                                                     |              | <0.05 | -7.34531 |
| 15012454 ---                                                                                     |              | <0.05 | -7.35196 |
| 15137568 ---                                                                                     |              | <0.05 | -7.36045 |
| 15063328 ---                                                                                     |              | <0.05 | -7.38668 |
| 15059965 ---                                                                                     |              | <0.05 | -7.39011 |
| 15123449 ---                                                                                     |              | <0.05 | -7.41895 |
| 15137636 ---                                                                                     |              | <0.05 | -7.43107 |
| 15055971 ---                                                                                     |              | <0.05 | -7.43889 |
| 15053647 ---                                                                                     |              | <0.05 | -7.44931 |
| 15136298 ---                                                                                     |              | <0.05 | -7.45222 |
| 15109510 ---                                                                                     |              | <0.05 | -7.45327 |
| 15077203 ---                                                                                     |              | <0.05 | -7.46439 |
| 15137228 ---                                                                                     |              | <0.05 | -7.48093 |
| 15041507 ---                                                                                     |              | <0.05 | -7.48775 |
| 15024317 ---                                                                                     |              | <0.05 | -7.48955 |
| 15110453 ---                                                                                     |              | <0.05 | -7.57422 |
| 15026550 ---                                                                                     |              | <0.05 | -7.57471 |
| 15042542 ---                                                                                     |              | <0.05 | -7.578   |
| 14992988 ---                                                                                     |              | <0.05 | -7.60698 |
| 14984066 ---                                                                                     |              | <0.05 | -7.62122 |
| 14998601 ---                                                                                     |              | <0.05 | -7.63192 |
| 15045625 ---                                                                                     |              | <0.05 | -7.637   |
| 15123184 ---                                                                                     |              | <0.05 | -7.6411  |
| 15028963 ---                                                                                     |              | <0.05 | -7.64736 |
| 15073640 ---                                                                                     |              | <0.05 | -7.64785 |
| 14958185 ---                                                                                     |              | <0.05 | -7.66483 |
| 15051448 ---                                                                                     |              | <0.05 | -7.66551 |
| 15020204 ---                                                                                     |              | <0.05 | -7.66586 |
| 15060076 ---                                                                                     |              | <0.05 | -7.67222 |
| 15122248 ---                                                                                     |              | <0.05 | -7.67403 |
| 15104066 ---                                                                                     |              | <0.05 | -7.6904  |
| 15072312 ---                                                                                     |              | <0.05 | -7.6913  |
| 14939650 ---                                                                                     |              | <0.05 | -7.7137  |
| 15129826 ---                                                                                     |              | <0.05 | -7.73411 |
| 15071089 ENSECAT00000013150 // LOC100055973 // platelet basic protein-like // --- // 100055973 / | LOC100055973 | <0.05 | -7.75594 |
| 15136270 ---                                                                                     |              | <0.05 | -7.76139 |
| 14952260 ---                                                                                     |              | <0.05 | -7.76415 |
| 15095844 ---                                                                                     |              | <0.05 | -7.77077 |
| 15066400 ---                                                                                     |              | <0.05 | -7.7779  |
| 14934197 ---                                                                                     |              | <0.05 | -7.78068 |
| 14935083 ---                                                                                     |              | <0.05 | -7.78525 |
| 15124436 ENSECAT00000022529 // HAS2 // hyaluronan synthase 2 // --- // 100009708 // NM_00108180  | HAS2         | <0.05 | -7.79228 |
| 14985498 ---                                                                                     |              | <0.05 | -7.79989 |
| 15056890 ---                                                                                     |              | <0.05 | -7.81155 |
| 15137162 ---                                                                                     |              | <0.05 | -7.82752 |
| 15121690 ---                                                                                     |              | <0.05 | -7.83272 |
| 14931609 ---                                                                                     |              | <0.05 | -7.84316 |
| 15039926 ---                                                                                     |              | <0.05 | -7.85776 |
| 14949019 ---                                                                                     |              | <0.05 | -7.8714  |
| 15136432 ---                                                                                     |              | <0.05 | -7.88126 |
| 15137270 ---                                                                                     |              | <0.05 | -7.88633 |

|                                                                                                  |              |                |
|--------------------------------------------------------------------------------------------------|--------------|----------------|
| 15007125 ---                                                                                     | <0.05        | -7.89062       |
| 15123694 ---                                                                                     | <0.05        | -7.89842       |
| 15027009 ---                                                                                     | <0.05        | -7.91625       |
| 14945080 ---                                                                                     | <0.05        | -7.92586       |
| 15137042 ---                                                                                     | <0.05        | -7.928         |
| 14969510 ---                                                                                     | <0.05        | -7.94725       |
| 15000214 ---                                                                                     | <0.05        | -7.96628       |
| 15132669 ---                                                                                     | <0.05        | -7.98623       |
| 15094482 ---                                                                                     | <0.05        | -8.00927       |
| 14945078 ---                                                                                     | <0.05        | -8.05213       |
| 14969979 ---                                                                                     | <0.05        | -8.06564       |
| 15076105 XM_001494556 // AKAP12 // A kinase (PRKA) anchor protein 12 // --- // 100063263 /// ENS | AKAP12       | <0.05 -8.10626 |
| 15121610 ---                                                                                     | <0.05        | -8.10677       |
| 14985496 ---                                                                                     | <0.05        | -8.11241       |
| 14987985 ---                                                                                     | <0.05        | -8.11648       |
| 14933031 ---                                                                                     | <0.05        | -8.11774       |
| 15059859 ---                                                                                     | <0.05        | -8.1323        |
| 14965242 NM_001081802 // ITGB3 // integrin, beta 3 (platelet glycoprotein IIIa, antigen CD61) // | ITGB3        | <0.05 -8.13322 |
| 14999420 ---                                                                                     | <0.05        | -8.14828       |
| 15085953 ---                                                                                     | <0.05        | -8.19096       |
| 15054869 ---                                                                                     | <0.05        | -8.1916        |
| 15035982 ---                                                                                     | <0.05        | -8.19331       |
| 15136616 ---                                                                                     | <0.05        | -8.19331       |
| 14926331 ---                                                                                     | <0.05        | -8.20532       |
| 15137626 ---                                                                                     | <0.05        | -8.21972       |
| 15062954 ---                                                                                     | <0.05        | -8.2288        |
| 15008758 ---                                                                                     | <0.05        | -8.25748       |
| 15092756 ---                                                                                     | <0.05        | -8.30135       |
| 15110535 ---                                                                                     | <0.05        | -8.32086       |
| 15136996 ---                                                                                     | <0.05        | -8.32595       |
| 15132711 ---                                                                                     | <0.05        | -8.36814       |
| 15137408 ---                                                                                     | <0.05        | -8.36814       |
| 15137010 ---                                                                                     | <0.05        | -8.37375       |
| 14994399 ---                                                                                     | <0.05        | -8.42077       |
| 15039230 ---                                                                                     | <0.05        | -8.42682       |
| 14925355 ---                                                                                     | <0.05        | -8.42887       |
| 15005345 ---                                                                                     | <0.05        | -8.45847       |
| 14927023 ---                                                                                     | <0.05        | -8.46258       |
| 15130872 ---                                                                                     | <0.05        | -8.46529       |
| 15071334 ---                                                                                     | <0.05        | -8.53064       |
| 15051602 ---                                                                                     | <0.05        | -8.54231       |
| 15136772 ---                                                                                     | <0.05        | -8.54809       |
| 15104212 ---                                                                                     | <0.05        | -8.55211       |
| 15128304 ---                                                                                     | <0.05        | -8.55287       |
| 15057842 ---                                                                                     | <0.05        | -8.56311       |
| 15060547 ---                                                                                     | <0.05        | -8.56675       |
| 15136842 ---                                                                                     | <0.05        | -8.574         |
| 15101197 ---                                                                                     | <0.05        | -8.60064       |
| 15062893 ---                                                                                     | <0.05        | -8.60105       |
| 15137278 ---                                                                                     | <0.05        | -8.61951       |
| 15014596 ---                                                                                     | <0.05        | -8.62483       |
| 15115488 ---                                                                                     | <0.05        | -8.63028       |
| 15025986 ---                                                                                     | <0.05        | -8.6793        |
| 15123776 ---                                                                                     | <0.05        | -8.68474       |
| 15013019 ---                                                                                     | <0.05        | -8.70073       |
| 14985150 ---                                                                                     | <0.05        | -8.71167       |
| 15022476 ---                                                                                     | <0.05        | -8.71329       |
| 14974292 ---                                                                                     | <0.05        | -8.72066       |
| 15104279 ---                                                                                     | <0.05        | -8.7291        |
| 15136794 ---                                                                                     | <0.05        | -8.73802       |
| 15057281 ---                                                                                     | <0.05        | -8.74745       |
| 15136350 ---                                                                                     | <0.05        | -8.7521        |
| 15003875 ---                                                                                     | <0.05        | -8.77973       |
| 15136702 ---                                                                                     | <0.05        | -8.8113        |
| 15136904 ---                                                                                     | <0.05        | -8.81622       |
| 15005308 ---                                                                                     | <0.05        | -8.81889       |
| 15048744 ---                                                                                     | <0.05        | -8.84417       |
| 15087957 ---                                                                                     | <0.05        | -8.85053       |
| 15137560 ---                                                                                     | <0.05        | -8.85836       |
| 14954007 ENSECAT00000021129 // LOC100147106 // uncharacterized LOC100147106 // --- // 100147106  | LOC100147106 | <0.05 -8.86357 |
| 15137064 ---                                                                                     | <0.05        | -8.87788       |
| 15137060 ---                                                                                     | <0.05        | -8.89615       |
| 15133231 ---                                                                                     | <0.05        | -8.92988       |
| 15033040 ---                                                                                     | <0.05        | -8.96715       |
| 15008795 ---                                                                                     | <0.05        | -8.97923       |
| 14939930 ---                                                                                     | <0.05        | -9.0112        |
| 15136544 ---                                                                                     | <0.05        | -9.08944       |
| 15130692 ---                                                                                     | <0.05        | -9.08971       |
| 14938040 ---                                                                                     | <0.05        | -9.09147       |
| 15131203 ---                                                                                     | <0.05        | -9.10315       |
| 14950082 ---                                                                                     | <0.05        | -9.12671       |
| 15087535 ---                                                                                     | <0.05        | -9.15312       |
| 15033411 ---                                                                                     | <0.05        | -9.18649       |
| 15060455 ---                                                                                     | <0.05        | -9.19773       |
| 15081530 ---                                                                                     | <0.05        | -9.22302       |
| 15136936 ---                                                                                     | <0.05        | -9.25399       |
| 14934920 ---                                                                                     | <0.05        | -9.27641       |
| 15123515 ---                                                                                     | <0.05        | -9.29494       |
| 14938232 ---                                                                                     | <0.05        | -9.31958       |
| 15126812 ---                                                                                     | <0.05        | -9.3368        |
| 15082470 ---                                                                                     | <0.05        | -9.33748       |
| 14989338 ---                                                                                     | <0.05        | -9.33968       |
| 15115243 ---                                                                                     | <0.05        | -9.36364       |
| 15106374 ---                                                                                     | <0.05        | -9.42303       |
| 15001110 ---                                                                                     | <0.05        | -9.44207       |
| 14942828 ---                                                                                     | <0.05        | -9.44707       |
| 15006694 ---                                                                                     | <0.05        | -9.4937        |
| 15088963 ---                                                                                     | <0.05        | -9.50891       |
| 15080985 ---                                                                                     | <0.05        | -9.52693       |
| 15071325 ---                                                                                     | <0.05        | -9.52777       |
| 15076209 ENSECAT00000023278 // LOC100060503 // uronyl 2-sulfotransferase-like // --- // 10006050 | LOC100060503 | <0.05 -9.60028 |
| 14966664 ---                                                                                     | <0.05        | -9.62064       |
| 15103641 NR_032873 // MIR7-2 // microRNA mir-7-2 // --- // 100315008                             | MIR7-2       | <0.05 -9.67189 |
| 15100530 ---                                                                                     | <0.05        | -9.69646       |
| 15123607 ---                                                                                     | <0.05        | -9.69954       |
| 15018734 ---                                                                                     | <0.05        | -9.70939       |

|          |                                                                                         |              |       |          |
|----------|-----------------------------------------------------------------------------------------|--------------|-------|----------|
| 15120364 | ENSECAT00000018691 // TCF7L2 // transcription factor 7-like 2 (T-cell specific, HMG-box | TCF7L2       | <0.05 | -9.74285 |
| 15062669 | NM_001111342 // IL2RA // interleukin 2 receptor, alpha // --- // 10070292 /// ENSECAT0  | IL2RA        | <0.05 | -9.76642 |
| 14928021 | ---                                                                                     |              | <0.05 | -9.77627 |
| 15136358 | ---                                                                                     |              | <0.05 | -9.82317 |
| 15034555 | ---                                                                                     |              | <0.05 | -9.82738 |
| 15082266 | ---                                                                                     |              | <0.05 | -9.83919 |
| 15110907 | ---                                                                                     |              | <0.05 | -9.84167 |
| 15009515 | ---                                                                                     |              | <0.05 | -9.85658 |
| 15116897 | ---                                                                                     |              | <0.05 | -9.85674 |
| 14972822 | ---                                                                                     |              | <0.05 | -9.86893 |
| 15136724 | ---                                                                                     |              | <0.05 | -9.87303 |
| 15038502 | ---                                                                                     |              | <0.05 | -9.88557 |
| 15137306 | ---                                                                                     |              | <0.05 | -9.89187 |
| 14949239 | ---                                                                                     |              | <0.05 | -9.91085 |
| 15123696 | ---                                                                                     |              | <0.05 | -9.94105 |
| 15056884 | ---                                                                                     |              | <0.05 | -9.94743 |
| 15076475 | ---                                                                                     |              | <0.05 | -9.96444 |
| 15131878 | ---                                                                                     |              | <0.05 | -9.97001 |
| 14929483 | ---                                                                                     |              | <0.05 | -9.97779 |
| 14990746 | ---                                                                                     |              | <0.05 | -9.98512 |
| 14948616 | ---                                                                                     |              | <0.05 | -9.9901  |
| 15035443 | ---                                                                                     |              | <0.05 | -10.0111 |
| 15091422 | ---                                                                                     |              | <0.05 | -10.0137 |
| 15136932 | ---                                                                                     |              | <0.05 | -10.0562 |
| 14946017 | ---                                                                                     |              | <0.05 | -10.1085 |
| 15021574 | ---                                                                                     |              | <0.05 | -10.125  |
| 15078951 | ---                                                                                     |              | <0.05 | -10.1259 |
| 15119937 | ---                                                                                     |              | <0.05 | -10.1436 |
| 15136726 | ---                                                                                     |              | <0.05 | -10.1502 |
| 15131829 | ---                                                                                     |              | <0.05 | -10.1701 |
| 15136330 | ---                                                                                     |              | <0.05 | -10.1879 |
| 15136396 | ---                                                                                     |              | <0.05 | -10.1879 |
| 15092776 | ---                                                                                     |              | <0.05 | -10.2483 |
| 14925107 | ---                                                                                     |              | <0.05 | -10.2665 |
| 15133248 | ---                                                                                     |              | <0.05 | -10.2836 |
| 15133576 | ---                                                                                     |              | <0.05 | -10.3176 |
| 15094905 | NM_001257078 // CXCR7 // chemokine (C-X-C motif) receptor 7 // --- // 100057501 /// ENS | CXCR7        | <0.05 | -10.324  |
| 14986670 | ---                                                                                     |              | <0.05 | -10.3378 |
| 15013214 | ---                                                                                     |              | <0.05 | -10.3447 |
| 14938015 | ---                                                                                     |              | <0.05 | -10.365  |
| 15016292 | ---                                                                                     |              | <0.05 | -10.3722 |
| 15036426 | XM_001915341 // LOC100146206 // thrombomodulin-like // --- // 100146206 /// ENSECAT0000 | LOC100146206 | <0.05 | -10.3736 |
| 14927123 | ---                                                                                     |              | <0.05 | -10.3866 |
| 14969935 | ---                                                                                     |              | <0.05 | -10.43   |
| 15136988 | ---                                                                                     |              | <0.05 | -10.4448 |
| 14927731 | ---                                                                                     |              | <0.05 | -10.4651 |
| 15136320 | ---                                                                                     |              | <0.05 | -10.4659 |
| 14942998 | ---                                                                                     |              | <0.05 | -10.4891 |
| 15045391 | ---                                                                                     |              | <0.05 | -10.5134 |
| 14937067 | ---                                                                                     |              | <0.05 | -10.5778 |
| 14976461 | ---                                                                                     |              | <0.05 | -10.5793 |
| 15137284 | ---                                                                                     |              | <0.05 | -10.614  |
| 14927203 | ---                                                                                     |              | <0.05 | -10.843  |
| 15006532 | ---                                                                                     |              | <0.05 | -10.9163 |
| 15071344 | ---                                                                                     |              | <0.05 | -10.9631 |
| 15020143 | ---                                                                                     |              | <0.05 | -10.9861 |
| 15003586 | ---                                                                                     |              | <0.05 | -11.0115 |
| 15030212 | XM_001505026 // LOC100052624 // histone H2A type 1-like // --- // 100052624 /// ENSECAT | LOC100052624 | <0.05 | -11.0312 |
| 15055631 | ---                                                                                     |              | <0.05 | -11.0744 |
| 15029956 | ---                                                                                     |              | <0.05 | -11.0774 |
| 14934714 | ---                                                                                     |              | <0.05 | -11.1017 |
| 15011590 | ---                                                                                     |              | <0.05 | -11.1183 |
| 15136368 | ---                                                                                     |              | <0.05 | -11.1494 |
| 14981433 | ---                                                                                     |              | <0.05 | -11.2217 |
| 15057108 | ---                                                                                     |              | <0.05 | -11.2319 |
| 14982053 | ---                                                                                     |              | <0.05 | -11.2916 |
| 15133239 | ---                                                                                     |              | <0.05 | -11.3045 |
| 15026624 | ---                                                                                     |              | <0.05 | -11.3386 |
| 15015661 | ---                                                                                     |              | <0.05 | -11.3752 |
| 15014012 | ---                                                                                     |              | <0.05 | -11.4103 |
| 15030285 | XM_003363755 // LOC100629501 // olfactory receptor 2W1-like // --- // 100629501 /// ENS | LOC100629501 | <0.05 | -11.4432 |
| 14945591 | ---                                                                                     |              | <0.05 | -11.4986 |
| 15129526 | ---                                                                                     |              | <0.05 | -11.5022 |
| 15076479 | XM_001489227 // SEMA3C // sema domain, immunoglobulin domain (Ig), short basic domain,  | SEMA3C       | <0.05 | -11.5196 |
| 15137046 | ---                                                                                     |              | <0.05 | -11.5565 |
| 15128302 | ---                                                                                     |              | <0.05 | -11.5748 |
| 15136312 | ---                                                                                     |              | <0.05 | -11.5755 |
| 14986175 | ---                                                                                     |              | <0.05 | -11.63   |
| 14962344 | ---                                                                                     |              | <0.05 | -11.6532 |
| 15136958 | ---                                                                                     |              | <0.05 | -11.7001 |
| 15120682 | ---                                                                                     |              | <0.05 | -11.7021 |
| 14934934 | ---                                                                                     |              | <0.05 | -11.7342 |
| 15137608 | ---                                                                                     |              | <0.05 | -11.7469 |
| 14945248 | ---                                                                                     |              | <0.05 | -11.7834 |
| 15095352 | ---                                                                                     |              | <0.05 | -11.7863 |
| 15120725 | ---                                                                                     |              | <0.05 | -11.8124 |
| 15128306 | ---                                                                                     |              | <0.05 | -11.8212 |
| 15077680 | ---                                                                                     |              | <0.05 | -11.8639 |
| 15106867 | ---                                                                                     |              | <0.05 | -11.883  |
| 15136798 | ---                                                                                     |              | <0.05 | -11.923  |
| 14986928 | ---                                                                                     |              | <0.05 | -11.9384 |
| 15129744 | ---                                                                                     |              | <0.05 | -11.9658 |
| 15081996 | ---                                                                                     |              | <0.05 | -12.0043 |
| 14987283 | ---                                                                                     |              | <0.05 | -12.0545 |
| 15136978 | ---                                                                                     |              | <0.05 | -12.1102 |
| 14943919 | ---                                                                                     |              | <0.05 | -12.2044 |
| 14936831 | ---                                                                                     |              | <0.05 | -12.2348 |
| 15137328 | ---                                                                                     |              | <0.05 | -12.2747 |
| 14962196 | ---                                                                                     |              | <0.05 | -12.3211 |
| 15136494 | ---                                                                                     |              | <0.05 | -12.3273 |
| 15077189 | ---                                                                                     |              | <0.05 | -12.357  |
| 15127303 | ---                                                                                     |              | <0.05 | -12.362  |
| 15081440 | ---                                                                                     |              | <0.05 | -12.3633 |
| 15137740 | ---                                                                                     |              | <0.05 | -12.4339 |
| 15116856 | XM_003365564 // SERPINB2 // serpin peptidase inhibitor, clade B (ovalbumin), member 2 / | SERPINB2     | <0.05 | -12.5161 |
| 14979733 | ---                                                                                     |              | <0.05 | -12.5955 |

|          |                                                                                          |              |          |          |
|----------|------------------------------------------------------------------------------------------|--------------|----------|----------|
| 15107853 | ---                                                                                      | <0.05        | -12.5985 |          |
| 15070812 | ---                                                                                      | <0.05        | -12.634  |          |
| 15031964 | ---                                                                                      | <0.05        | -12.6654 |          |
| 15029693 | ---                                                                                      | <0.05        | -12.67   |          |
| 15136558 | ---                                                                                      | <0.05        | -12.67   |          |
| 15077630 | ---                                                                                      | <0.05        | -12.7092 |          |
| 15137092 | ---                                                                                      | <0.05        | -12.7134 |          |
| 15101493 | ---                                                                                      | <0.05        | -12.7499 |          |
| 15136774 | ---                                                                                      | <0.05        | -12.7733 |          |
| 15137338 | ---                                                                                      | <0.05        | -12.7785 |          |
| 14928003 | ---                                                                                      | <0.05        | -12.8005 |          |
| 14934917 | ---                                                                                      | <0.05        | -12.8454 |          |
| 15114127 | ---                                                                                      | <0.05        | -12.8503 |          |
| 15006335 | ---                                                                                      | <0.05        | -12.8522 |          |
| 15136364 | ---                                                                                      | <0.05        | -12.8522 |          |
| 15080682 | ENSECAT00000023984 // INHBA // inhibin, beta A // --- // 100034076 /// NM_001081909 //   | INHBA        | <0.05    | -12.8563 |
| 15063181 | ---                                                                                      | <0.05        | -12.865  |          |
| 15053644 | XR_036256 // LOC100068798 // calponin-3-like // --- // 100068798 /// XM_001490827 // LO  | LOC100068798 | <0.05    | -12.8677 |
| 15006938 | ---                                                                                      | <0.05        | -12.8778 |          |
| 15033037 | ---                                                                                      | <0.05        | -12.9188 |          |
| 14927755 | ---                                                                                      | <0.05        | -12.9437 |          |
| 14949316 | ---                                                                                      | <0.05        | -12.9467 |          |
| 14927167 | ---                                                                                      | <0.05        | -13.0055 |          |
| 15054865 | ---                                                                                      | <0.05        | -13.0417 |          |
| 15136722 | ---                                                                                      | <0.05        | -13.0417 |          |
| 15136390 | ---                                                                                      | <0.05        | -13.0457 |          |
| 15003625 | ---                                                                                      | <0.05        | -13.0727 |          |
| 15045573 | ---                                                                                      | <0.05        | -13.1091 |          |
| 15057372 | ---                                                                                      | <0.05        | -13.1106 |          |
| 15129919 | ---                                                                                      | <0.05        | -13.1292 |          |
| 15060545 | ---                                                                                      | <0.05        | -13.2365 |          |
| 14937073 | ---                                                                                      | <0.05        | -13.2641 |          |
| 15019934 | ---                                                                                      | <0.05        | -13.3434 |          |
| 15014984 | ---                                                                                      | <0.05        | -13.3484 |          |
| 14946299 | ---                                                                                      | <0.05        | -13.3576 |          |
| 15136876 | ---                                                                                      | <0.05        | -13.3913 |          |
| 15008985 | ---                                                                                      | <0.05        | -13.4618 |          |
| 15128327 | ---                                                                                      | <0.05        | -13.4813 |          |
| 15030305 | ---                                                                                      | <0.05        | -13.5114 |          |
| 15128934 | ---                                                                                      | <0.05        | -13.5188 |          |
| 14929431 | ---                                                                                      | <0.05        | -13.5294 |          |
| 15109357 | ENSECAT00000025715 // MMP1 // matrix metalloproteinase 1 (interstitial collagenase) // - | MMP1         | <0.05    | -13.5932 |
| 15001469 | ---                                                                                      | <0.05        | -13.6178 |          |
| 15071093 | ENSECAT00000013283 // CXCL6 // chemokine (C-X-C motif) ligand 6 (granulocyte chemotacti  | CXCL6        | <0.05    | -13.6482 |
| 14948030 | ---                                                                                      | <0.05        | -13.6582 |          |
| 15137280 | ---                                                                                      | <0.05        | -13.6852 |          |
| 15054737 | ---                                                                                      | <0.05        | -13.7121 |          |
| 15044653 | ---                                                                                      | <0.05        | -13.7904 |          |
| 15015913 | ---                                                                                      | <0.05        | -13.8098 |          |
| 14926777 | ---                                                                                      | <0.05        | -13.8383 |          |
| 14973166 | ---                                                                                      | <0.05        | -13.8526 |          |
| 15079137 | ---                                                                                      | <0.05        | -13.915  |          |
| 15005672 | ---                                                                                      | <0.05        | -13.9337 |          |
| 15060218 | NM_001081780 // LUM // lumican // --- // 100009681 /// ENSECAT00000019349 // LUM // lum  | LUM          | <0.05    | -13.935  |
| 14995453 | ---                                                                                      | <0.05        | -13.959  |          |
| 15136224 | ---                                                                                      | <0.05        | -13.9847 |          |
| 15110227 | ---                                                                                      | <0.05        | -14.0682 |          |
| 15068623 | ---                                                                                      | <0.05        | -14.1376 |          |
| 15121666 | ---                                                                                      | <0.05        | -14.2476 |          |
| 14966384 | ---                                                                                      | <0.05        | -14.3153 |          |
| 14940355 | XM_001488406 // LOC100052638 // granzyme B-like // --- // 100052638 /// ENSECAT000000008 | LOC100052638 | <0.05    | -14.4536 |
| 15126829 | ---                                                                                      | <0.05        | -14.4662 |          |
| 15137750 | ---                                                                                      | <0.05        | -14.4959 |          |
| 15011494 | ---                                                                                      | <0.05        | -14.5218 |          |
| 15077402 | ---                                                                                      | <0.05        | -14.555  |          |
| 14939195 | ---                                                                                      | <0.05        | -14.5698 |          |
| 15054918 | ---                                                                                      | <0.05        | -14.5802 |          |
| 14945347 | ---                                                                                      | <0.05        | -14.7454 |          |
| 15121695 | ---                                                                                      | <0.05        | -14.8225 |          |
| 15128857 | ---                                                                                      | <0.05        | -14.966  |          |
| 15136466 | ---                                                                                      | <0.05        | -14.9687 |          |
| 15132461 | ---                                                                                      | <0.05        | -15.1515 |          |
| 15077411 | ---                                                                                      | <0.05        | -15.1611 |          |
| 15136862 | ---                                                                                      | <0.05        | -15.2483 |          |
| 15062898 | ---                                                                                      | <0.05        | -15.2624 |          |
| 15137382 | ---                                                                                      | <0.05        | -15.2918 |          |
| 15137596 | ---                                                                                      | <0.05        | -15.2918 |          |
| 15137766 | ---                                                                                      | <0.05        | -15.2999 |          |
| 15128427 | ---                                                                                      | <0.05        | -15.3044 |          |
| 14932853 | ---                                                                                      | <0.05        | -15.433  |          |
| 15137438 | ---                                                                                      | <0.05        | -15.433  |          |
| 15062932 | ---                                                                                      | <0.05        | -15.4685 |          |
| 15006034 | ---                                                                                      | <0.05        | -15.6644 |          |
| 15054877 | ---                                                                                      | <0.05        | -15.7366 |          |
| 14953056 | ---                                                                                      | <0.05        | -15.7403 |          |
| 15029587 | ---                                                                                      | <0.05        | -15.771  |          |
| 14956069 | ---                                                                                      | <0.05        | -15.8166 |          |
| 14998899 | ---                                                                                      | <0.05        | -15.8931 |          |
| 15133022 | ---                                                                                      | <0.05        | -15.9749 |          |
| 15068686 | ---                                                                                      | <0.05        | -16.0166 |          |
| 15003583 | ---                                                                                      | <0.05        | -16.0171 |          |
| 15132692 | ---                                                                                      | <0.05        | -16.0431 |          |
| 14957420 | ---                                                                                      | <0.05        | -16.0549 |          |
| 15130203 | ---                                                                                      | <0.05        | -16.2028 |          |
| 14981220 | ---                                                                                      | <0.05        | -16.2115 |          |
| 15088030 | ---                                                                                      | <0.05        | -16.318  |          |
| 14981953 | ENSECAT00000019198 // ADAM19 // ADAM metalloproteinase domain 19 // --- // ---           | ADAM19       | <0.05    | -16.3272 |
| 15067949 | ---                                                                                      | <0.05        | -16.3686 |          |
| 15078648 | ---                                                                                      | <0.05        | -16.6413 |          |
| 15096212 | ---                                                                                      | <0.05        | -16.6892 |          |
| 15021779 | ---                                                                                      | <0.05        | -16.771  |          |
| 15132014 | ---                                                                                      | <0.05        | -16.9077 |          |
| 14987063 | ---                                                                                      | <0.05        | -17.0099 |          |
| 14965860 | ENSECAT00000008953 // CSF3 // colony stimulating factor 3 (granulocyte) // --- // 10003  | CSF3         | <0.05    | -17.0285 |
| 15132754 | ---                                                                                      | <0.05        | -17.0311 |          |
| 15136740 | ---                                                                                      | <0.05        | -17.0521 |          |

|                                                                                                  |              |          |          |
|--------------------------------------------------------------------------------------------------|--------------|----------|----------|
| 15133394 ---                                                                                     | <0.05        | -17.0556 |          |
| 14972192 ---                                                                                     | <0.05        | -17.1074 |          |
| 15131131 ---                                                                                     | <0.05        | -17.1132 |          |
| 15137618 ---                                                                                     | <0.05        | -17.16   |          |
| 14957006 ---                                                                                     | <0.05        | -17.1707 |          |
| 15063592 ---                                                                                     | <0.05        | -17.1957 |          |
| 15020762 ---                                                                                     | <0.05        | -17.2581 |          |
| 14970532 ---                                                                                     | <0.05        | -17.2951 |          |
| 15136360 ---                                                                                     | <0.05        | -17.3386 |          |
| 15137394 ---                                                                                     | <0.05        | -17.4174 |          |
| 15136446 ---                                                                                     | <0.05        | -17.4933 |          |
| 15136374 ---                                                                                     | <0.05        | -17.5034 |          |
| 15136754 ---                                                                                     | <0.05        | -17.5074 |          |
| 15002525 ---                                                                                     | <0.05        | -17.5505 |          |
| 15127535 ---                                                                                     | <0.05        | -17.5681 |          |
| 15082473 ---                                                                                     | <0.05        | -17.6968 |          |
| 15115696 ---                                                                                     | <0.05        | -17.7049 |          |
| 15128311 ---                                                                                     | <0.05        | -17.7146 |          |
| 15117833 ---                                                                                     | <0.05        | -17.727  |          |
| 15018759 ---                                                                                     | <0.05        | -17.8395 |          |
| 14956620 ---                                                                                     | <0.05        | -17.8451 |          |
| 14972820 XM_001497247 // LOC100067132 // olfactory receptor 476-like // --- // 100067132 /// ENS | LOC100067132 | <0.05    | -17.8474 |
| 14984939 ---                                                                                     | <0.05        | -17.8527 |          |
| 15032277 ---                                                                                     | <0.05        | -17.8782 |          |
| 14925807 ---                                                                                     | <0.05        | -17.9532 |          |
| 14925837 ---                                                                                     | <0.05        | -17.9532 |          |
| 14925879 ---                                                                                     | <0.05        | -17.9532 |          |
| 14925951 ---                                                                                     | <0.05        | -17.9532 |          |
| 14978864 ---                                                                                     | <0.05        | -18.0059 |          |
| 15137146 ---                                                                                     | <0.05        | -18.007  |          |
| 15082809 ---                                                                                     | <0.05        | -18.1827 |          |
| 15132482 ---                                                                                     | <0.05        | -18.2294 |          |
| 15067568 ---                                                                                     | <0.05        | -18.2673 |          |
| 15020350 ---                                                                                     | <0.05        | -18.2685 |          |
| 14994367 ---                                                                                     | <0.05        | -18.3086 |          |
| 15136226 ---                                                                                     | <0.05        | -18.3086 |          |
| 15117290 ---                                                                                     | <0.05        | -18.4039 |          |
| 15101307 ---                                                                                     | <0.05        | -18.4126 |          |
| 15136286 ---                                                                                     | <0.05        | -18.4182 |          |
| 15026537 ---                                                                                     | <0.05        | -18.4198 |          |
| 15129022 ---                                                                                     | <0.05        | -18.5343 |          |
| 14947605 ---                                                                                     | <0.05        | -18.5416 |          |
| 15136472 ---                                                                                     | <0.05        | -18.5454 |          |
| 14995193 ---                                                                                     | <0.05        | -18.5635 |          |
| 15078277 ---                                                                                     | <0.05        | -18.5838 |          |
| 15029101 ---                                                                                     | <0.05        | -18.6205 |          |
| 14936458 ---                                                                                     | <0.05        | -18.6637 |          |
| 15045035 ---                                                                                     | <0.05        | -18.677  |          |
| 15124574 ---                                                                                     | <0.05        | -18.7169 |          |
| 14986730 ---                                                                                     | <0.05        | -18.8457 |          |
| 15136564 ---                                                                                     | <0.05        | -18.8782 |          |
| 15042777 ---                                                                                     | <0.05        | -18.9303 |          |
| 14959143 ---                                                                                     | <0.05        | -19.0141 |          |
| 15130707 ---                                                                                     | <0.05        | -19.2377 |          |
| 15136302 ---                                                                                     | <0.05        | -19.2564 |          |
| 15067799 ---                                                                                     | <0.05        | -19.4071 |          |
| 15136210 ---                                                                                     | <0.05        | -19.4734 |          |
| 15051455 ---                                                                                     | <0.05        | -19.4757 |          |
| 14943132 ---                                                                                     | <0.05        | -19.567  |          |
| 15053642 ---                                                                                     | <0.05        | -19.9222 |          |
| 14940359 XM_001488426 // LOC100052689 // granzyme B-like // --- // 100052689 /// ENSECAT00000009 | LOC100052689 | <0.05    | -19.9253 |
| 15130705 ---                                                                                     | <0.05        | -19.9706 |          |
| 14992455 ---                                                                                     | <0.05        | -19.9856 |          |
| 15136206 ---                                                                                     | <0.05        | -19.9856 |          |
| 14984009 ---                                                                                     | <0.05        | -19.9861 |          |
| 15137736 ---                                                                                     | <0.05        | -19.9861 |          |
| 15092644 ---                                                                                     | <0.05        | -19.9962 |          |
| 15088797 ---                                                                                     | <0.05        | -20.068  |          |
| 15137694 ---                                                                                     | <0.05        | -20.078  |          |
| 14945595 ---                                                                                     | <0.05        | -20.1176 |          |
| 15081326 ---                                                                                     | <0.05        | -20.253  |          |
| 15070665 ---                                                                                     | <0.05        | -20.3069 |          |
| 15077744 ---                                                                                     | <0.05        | -20.5505 |          |
| 14981259 ---                                                                                     | <0.05        | -20.5628 |          |
| 15136398 ---                                                                                     | <0.05        | -20.5731 |          |
| 15137488 ---                                                                                     | <0.05        | -20.6121 |          |
| 15136990 ---                                                                                     | <0.05        | -20.6359 |          |
| 15137038 ---                                                                                     | <0.05        | -20.7475 |          |
| 15013715 ---                                                                                     | <0.05        | -20.9782 |          |
| 15095850 ---                                                                                     | <0.05        | -21.0675 |          |
| 15131874 ---                                                                                     | <0.05        | -21.2817 |          |
| 15130280 ---                                                                                     | <0.05        | -21.4392 |          |
| 15137376 ---                                                                                     | <0.05        | -21.4701 |          |
| 15009301 ---                                                                                     | <0.05        | -21.5584 |          |
| 15132186 ---                                                                                     | <0.05        | -21.6506 |          |
| 15081319 ---                                                                                     | <0.05        | -21.6663 |          |
| 15073950 ---                                                                                     | <0.05        | -21.7265 |          |
| 15006243 ---                                                                                     | <0.05        | -21.7552 |          |
| 15006991 ---                                                                                     | <0.05        | -21.8189 |          |
| 15081224 ---                                                                                     | <0.05        | -21.873  |          |
| 14994624 ---                                                                                     | <0.05        | -21.8924 |          |
| 15136260 ---                                                                                     | <0.05        | -22.0647 |          |
| 15136808 ---                                                                                     | <0.05        | -22.0968 |          |
| 14997932 ---                                                                                     | <0.05        | -22.1161 |          |
| 14951445 ---                                                                                     | <0.05        | -22.1351 |          |
| 14956174 ---                                                                                     | <0.05        | -22.2277 |          |
| 15121381 ---                                                                                     | <0.05        | -22.2542 |          |
| 15131450 ---                                                                                     | <0.05        | -22.2625 |          |
| 15137370 ---                                                                                     | <0.05        | -22.3584 |          |
| 15136846 ---                                                                                     | <0.05        | -22.3896 |          |
| 15104019 ---                                                                                     | <0.05        | -22.4938 |          |
| 15133141 ---                                                                                     | <0.05        | -22.5699 |          |
| 15137422 ---                                                                                     | <0.05        | -22.5763 |          |
| 15067039 ---                                                                                     | <0.05        | -22.5821 |          |
| 14952507 ---                                                                                     | <0.05        | -22.6912 |          |
| 15047659 ---                                                                                     | <0.05        | -22.7562 |          |



|                                                                                                  |              |       |          |
|--------------------------------------------------------------------------------------------------|--------------|-------|----------|
| 15104015 ---                                                                                     |              | <0.05 | -22.7969 |
| 15136580 ---                                                                                     |              | <0.05 | -23.1692 |
| 15013552 ---                                                                                     |              | <0.05 | -23.2454 |
| 15071332 ---                                                                                     |              | <0.05 | -23.2671 |
| 14978556 ---                                                                                     |              | <0.05 | -23.3349 |
| 15136930 ---                                                                                     |              | <0.05 | -23.3383 |
| 15091433 ---                                                                                     |              | <0.05 | -23.5413 |
| 14975354 AF508034 // PAI-1 // plasminogen activator inhibitor-1 // --- // 100033931              | PAI-1        | <0.05 | -23.8273 |
| 15128853 ---                                                                                     |              | <0.05 | -24.1031 |
| 15052447 ---                                                                                     |              | <0.05 | -24.1896 |
| 15035006 ---                                                                                     |              | <0.05 | -24.1938 |
| 15002933 ---                                                                                     |              | <0.05 | -24.2487 |
| 15003532 ---                                                                                     |              | <0.05 | -24.3102 |
| 14930777 ---                                                                                     |              | <0.05 | -24.5117 |
| 15136434 ---                                                                                     |              | <0.05 | -24.7339 |
| 15025136 ---                                                                                     |              | <0.05 | -24.7365 |
| 15137522 ---                                                                                     |              | <0.05 | -24.8593 |
| 15066549 ---                                                                                     |              | <0.05 | -25.1399 |
| 15066331 ---                                                                                     |              | <0.05 | -25.1991 |
| 14927037 ---                                                                                     |              | <0.05 | -25.2551 |
| 15000483 ---                                                                                     |              | <0.05 | -25.2714 |
| 15011434 ENSECAT00000004554 // PTX3 // pentraxin 3, long // --- // ---                           | PTX3         | <0.05 | -25.3722 |
| 15067000 ---                                                                                     |              | <0.05 | -25.8976 |
| 15021588 ---                                                                                     |              | <0.05 | -25.9139 |
| 15097038 ---                                                                                     |              | <0.05 | -25.9746 |
| 15137450 ---                                                                                     |              | <0.05 | -26.0121 |
| 15075331 ---                                                                                     |              | <0.05 | -26.0917 |
| 15024544 ---                                                                                     |              | <0.05 | -26.1531 |
| 14943439 ---                                                                                     |              | <0.05 | -26.813  |
| 15136662 ---                                                                                     |              | <0.05 | -26.9099 |
| 15003542 ---                                                                                     |              | <0.05 | -26.9591 |
| 15137700 ---                                                                                     |              | <0.05 | -26.9642 |
| 15047220 ---                                                                                     |              | <0.05 | -27.28   |
| 15136458 ---                                                                                     |              | <0.05 | -27.4124 |
| 15115746 ---                                                                                     |              | <0.05 | -27.4148 |
| 15022133 ---                                                                                     |              | <0.05 | -27.6343 |
| 15019959 ---                                                                                     |              | <0.05 | -27.7861 |
| 15136532 ---                                                                                     |              | <0.05 | -27.9585 |
| 15001446 ---                                                                                     |              | <0.05 | -28.1817 |
| 15136292 ---                                                                                     |              | <0.05 | -28.1817 |
| 15136620 ---                                                                                     |              | <0.05 | -28.2968 |
| 15136790 ---                                                                                     |              | <0.05 | -28.3046 |
| 15131847 ---                                                                                     |              | <0.05 | -28.5569 |
| 14949750 ---                                                                                     |              | <0.05 | -28.8852 |
| 15085237 ---                                                                                     |              | <0.05 | -28.9337 |
| 15137490 ---                                                                                     |              | <0.05 | -29.0469 |
| 15136244 ---                                                                                     |              | <0.05 | -29.1084 |
| 14935042 ---                                                                                     |              | <0.05 | -29.2099 |
| 15136584 ---                                                                                     |              | <0.05 | -29.3036 |
| 14939913 XM_003363631 // LOC100629686 // ig kappa chain V-III region PC 2485/PC 4039-like // --- | LOC100629686 | <0.05 | -29.312  |
| 15025367 ---                                                                                     |              | <0.05 | -29.3716 |
| 15026893 ---                                                                                     |              | <0.05 | -29.4833 |
| 15081328 ---                                                                                     |              | <0.05 | -29.8041 |
| 15060263 ---                                                                                     |              | <0.05 | -29.8346 |
| 15137214 ---                                                                                     |              | <0.05 | -29.9268 |
| 15096136 ---                                                                                     |              | <0.05 | -29.931  |
| 15004469 ---                                                                                     |              | <0.05 | -29.9682 |
| 14938460 ---                                                                                     |              | <0.05 | -29.9793 |
| 15013653 ---                                                                                     |              | <0.05 | -30.0631 |
| 15137684 ---                                                                                     |              | <0.05 | -30.1908 |
| 14970624 ---                                                                                     |              | <0.05 | -30.2479 |
| 14943758 ---                                                                                     |              | <0.05 | -30.3293 |
| 15077222 ---                                                                                     |              | <0.05 | -30.5649 |
| 15136674 ---                                                                                     |              | <0.05 | -30.5955 |
| 15136770 ---                                                                                     |              | <0.05 | -30.8029 |
| 15137336 ---                                                                                     |              | <0.05 | -30.8412 |
| 15067793 ---                                                                                     |              | <0.05 | -31.2409 |
| 14949314 ---                                                                                     |              | <0.05 | -31.3397 |
| 15136442 ---                                                                                     |              | <0.05 | -31.7406 |
| 14943621 ---                                                                                     |              | <0.05 | -32.1469 |
| 15128313 ---                                                                                     |              | <0.05 | -32.2533 |
| 14927251 ---                                                                                     |              | <0.05 | -32.2825 |
| 15008001 ---                                                                                     |              | <0.05 | -32.2965 |
| 14942831 ---                                                                                     |              | <0.05 | -32.4793 |
| 15136884 ---                                                                                     |              | <0.05 | -32.5006 |
| 14939826 ---                                                                                     |              | <0.05 | -32.5426 |
| 15136786 ---                                                                                     |              | <0.05 | -32.7815 |
| 15136478 ---                                                                                     |              | <0.05 | -33.1294 |
| 15137138 ---                                                                                     |              | <0.05 | -33.5849 |
| 15026633 ---                                                                                     |              | <0.05 | -33.6268 |
| 15033547 ---                                                                                     |              | <0.05 | -33.6459 |
| 14953577 ---                                                                                     |              | <0.05 | -33.6867 |
| 15115930 ---                                                                                     |              | <0.05 | -33.8559 |
| 15047176 ---                                                                                     |              | <0.05 | -34.2521 |
| 14986542 ---                                                                                     |              | <0.05 | -34.5596 |
| 15123572 ---                                                                                     |              | <0.05 | -34.7115 |
| 15031962 ---                                                                                     |              | <0.05 | -34.8324 |
| 15013612 ---                                                                                     |              | <0.05 | -34.8776 |
| 15128937 ---                                                                                     |              | <0.05 | -35.153  |
| 15137318 ---                                                                                     |              | <0.05 | -35.153  |
| 15110451 ---                                                                                     |              | <0.05 | -35.2867 |
| 15080685 ---                                                                                     |              | <0.05 | -35.702  |
| 14952251 ---                                                                                     |              | <0.05 | -35.9024 |
| 15137586 ---                                                                                     |              | <0.05 | -35.9024 |
| 15137582 ---                                                                                     |              | <0.05 | -36.0792 |
| 14996189 ---                                                                                     |              | <0.05 | -36.1282 |
| 15137460 ---                                                                                     |              | <0.05 | -36.4128 |
| 15132102 ---                                                                                     |              | <0.05 | -36.6078 |
| 15136926 ---                                                                                     |              | <0.05 | -37.4779 |
| 15128840 ---                                                                                     |              | <0.05 | -37.5234 |
| 15136666 ---                                                                                     |              | <0.05 | -37.6173 |
| 14935334 ---                                                                                     |              | <0.05 | -37.6561 |
| 15136698 ---                                                                                     |              | <0.05 | -37.8108 |
| 15137182 ---                                                                                     |              | <0.05 | -37.991  |
| 15097439 ---                                                                                     |              | <0.05 | -38.1454 |
| 15128145 ---                                                                                     |              | <0.05 | -38.3314 |

|          |                                                                                         |              |                |
|----------|-----------------------------------------------------------------------------------------|--------------|----------------|
| 14969512 | ---                                                                                     | <0.05        | -38.3468       |
| 15136230 | ---                                                                                     | <0.05        | -38.4083       |
| 14937086 | ---                                                                                     | <0.05        | -38.7106       |
| 15021111 | ---                                                                                     | <0.05        | -38.751        |
| 15053588 | ---                                                                                     | <0.05        | -38.7772       |
| 15007548 | ---                                                                                     | <0.05        | -38.8115       |
| 14944218 | ---                                                                                     | <0.05        | -39.0484       |
| 14936804 | ---                                                                                     | <0.05        | -39.2676       |
| 15136530 | ---                                                                                     | <0.05        | -40.011        |
| 15002538 | ---                                                                                     | <0.05        | -40.1598       |
| 15026631 | ---                                                                                     | <0.05        | -40.6787       |
| 14978691 | ---                                                                                     | <0.05        | -40.6799       |
| 14947542 | XM_001503599 // THBS1 // thrombospondin 1 // --- // 100057478 /// ENSECAT0000009707 //  | THBS1        | <0.05 -40.7094 |
| 14995011 | ---                                                                                     | <0.05        | -41.0053       |
| 15136238 | ---                                                                                     | <0.05        | -41.0053       |
| 15137326 | ---                                                                                     | <0.05        | -42.4186       |
| 15126570 | ---                                                                                     | <0.05        | -42.6344       |
| 15137436 | ---                                                                                     | <0.05        | -43.1264       |
| 15137530 | ---                                                                                     | <0.05        | -43.429        |
| 15129820 | ---                                                                                     | <0.05        | -43.4952       |
| 15137512 | ---                                                                                     | <0.05        | -44.3088       |
| 15136308 | ---                                                                                     | <0.05        | -44.3743       |
| 15081696 | ---                                                                                     | <0.05        | -44.4924       |
| 15137562 | ---                                                                                     | <0.05        | -45.255        |
| 15088044 | XM_001491449 // LOC100058506 // tissue factor-like // --- // 100058506 /// ENSECAT00000 | LOC100058506 | <0.05 -45.2893 |
| 15128737 | ---                                                                                     | <0.05        | -45.3077       |
| 15137556 | ---                                                                                     | <0.05        | -45.6471       |
| 14948800 | ---                                                                                     | <0.05        | -46.3879       |
| 15136922 | ---                                                                                     | <0.05        | -47.074        |
| 15137244 | ---                                                                                     | <0.05        | -47.511        |
| 14997839 | ---                                                                                     | <0.05        | -47.6731       |
| 14996894 | ---                                                                                     | <0.05        | -48.2224       |
| 15123626 | ---                                                                                     | <0.05        | -48.8002       |
| 15136502 | ---                                                                                     | <0.05        | -49.0912       |
| 15042340 | ---                                                                                     | <0.05        | -49.9077       |
| 15128949 | ---                                                                                     | <0.05        | -50.085        |
| 15132227 | ---                                                                                     | <0.05        | -50.2184       |
| 15137396 | ---                                                                                     | <0.05        | -50.2184       |
| 15088688 | ---                                                                                     | <0.05        | -50.5678       |
| 14943127 | ---                                                                                     | <0.05        | -51.5054       |
| 15004330 | ---                                                                                     | <0.05        | -51.7294       |
| 15122064 | ---                                                                                     | <0.05        | -51.8703       |
| 15137288 | ---                                                                                     | <0.05        | -52.1903       |
| 15137524 | ---                                                                                     | <0.05        | -52.5658       |
| 15137386 | ---                                                                                     | <0.05        | -53.6274       |
| 15025326 | ---                                                                                     | <0.05        | -56.308        |
| 15042941 | ---                                                                                     | <0.05        | -56.308        |
| 14992314 | ---                                                                                     | <0.05        | -57.2961       |
| 15056875 | ---                                                                                     | <0.05        | -57.3263       |
| 15128806 | ---                                                                                     | <0.05        | -57.683        |
| 15137304 | ---                                                                                     | <0.05        | -57.683        |
| 15137420 | ---                                                                                     | <0.05        | -57.893        |
| 15065033 | ---                                                                                     | <0.05        | -58.9359       |
| 15137316 | ---                                                                                     | <0.05        | -59.0041       |
| 15054769 | ---                                                                                     | <0.05        | -59.3197       |
| 15040330 | ---                                                                                     | <0.05        | -59.991        |
| 15136282 | ---                                                                                     | <0.05        | -60.5216       |
| 14992104 | ---                                                                                     | <0.05        | -60.7582       |
| 14926511 | ---                                                                                     | <0.05        | -61.6782       |
| 15077655 | ---                                                                                     | <0.05        | -62.1591       |
| 15136898 | ---                                                                                     | <0.05        | -62.1591       |
| 15111236 | ---                                                                                     | <0.05        | -62.2758       |
| 15136202 | ---                                                                                     | <0.05        | -62.3235       |
| 15137282 | ---                                                                                     | <0.05        | -62.6104       |
| 14956238 | ---                                                                                     | <0.05        | -62.9583       |
| 15065994 | ---                                                                                     | <0.05        | -64.2191       |
| 15137094 | ---                                                                                     | <0.05        | -67.7203       |
| 14998362 | ---                                                                                     | <0.05        | -68.0454       |
| 15136264 | ---                                                                                     | <0.05        | -68.0454       |
| 15137612 | ---                                                                                     | <0.05        | -68.869        |
| 15009517 | ---                                                                                     | <0.05        | -70.1267       |
| 15136414 | ---                                                                                     | <0.05        | -70.1267       |
| 14952023 | ---                                                                                     | <0.05        | -70.8349       |
| 15137574 | ---                                                                                     | <0.05        | -70.8349       |
| 15137466 | ---                                                                                     | <0.05        | -72.524        |
| 15137516 | ---                                                                                     | <0.05        | -77.4462       |
| 15132417 | ---                                                                                     | <0.05        | -82.3122       |
| 15136682 | ---                                                                                     | <0.05        | -89.1531       |
| 14941506 | ---                                                                                     | <0.05        | -89.2852       |
| 15137340 | ---                                                                                     | <0.05        | -91.5812       |
| 15025365 | ---                                                                                     | <0.05        | -93.9848       |
| 15136288 | ---                                                                                     | <0.05        | -98.4802       |
| 14941804 | ---                                                                                     | <0.05        | -130.059       |
| 15136486 | ---                                                                                     | <0.05        | -178.292       |
| 15136730 | ---                                                                                     | <0.05        | -184.898       |
| 15136318 | ---                                                                                     | <0.05        | -200.831       |
| 15136676 | ---                                                                                     | <0.05        | -242.107       |
