# Supplementary material for: Comparative transcriptome analysis of equine alveolar macrophages
Source: PubMed Central journal article supplement (PMC5412682; doi:10.1111/evj.12584), 2016-07-09
Supplement: EVJ-49-375-s005.pdf [file EVJ-49-375-s005.pdf]

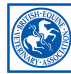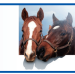

Supplementary Item 2: Genelist of LPS treated AMs ( in red letters are the transcripts identified by using the Affymetrix database, NetAffx (www.affymetrix.com))

| Transcript ID | Gene assignment                                                                                    | Official Gene Symbol (in red: information derived from NetAFFX) | p Value | Fold change | Description                    |
|---------------|----------------------------------------------------------------------------------------------------|-----------------------------------------------------------------|---------|-------------|--------------------------------|
| 15011434      | ENSECAT0000004554 // PTX3 // pentraxin 3, long // --- // ---                                       | PTX3                                                            | <0,05   | 21.2984     | 6h LPS treated vs 0h untreated |
| 15010745      | ENSECAT00000025375 // STAT4 // signal transducer and activator of transcription 4 // --            | STAT4                                                           | <0,05   | 12.1101     | 6h LPS treated vs 0h untreated |
| 14976056      | ENSECAT00000015671 // LOC100066317 // interleukin-27 subunit alpha-like // --- // 10006            | IL27                                                            | <0,05   | 10.647      | 6h LPS treated vs 0h untreated |
| 15088285      | XM_001493587 // GBP5 // guanylate binding protein 5 // --- // 100061762 /// ENSECAT0000            | GBP5                                                            | <0,05   | 8.6157      | 6h LPS treated vs 0h untreated |
| 14965860      | ENSECAT0000008953 // CSF3 // colony stimulating factor 3 (granulocyte) // --- // 10003             | CSF3                                                            | <0,05   | 7.75438     | 6h LPS treated vs 0h untreated |
| 15014787      | ---                                                                                                | ncrna:snRNA                                                     | <0,05   | 7.42842     | 6h LPS treated vs 0h untreated |
| 15031529      | ENSECAT00000016199 // LOC100066210 // CMRF35-like molecule 7-like // --- // 100066210 /            | CD300LB                                                         | <0,05   | 6.67726     | 6h LPS treated vs 0h untreated |
| 15064310      | ENSECAT00000019145 // LOC100062332 // c-C motif chemokine 22-like // --- // 100062332 /            | CCL22                                                           | <0,05   | 6.20255     | 6h LPS treated vs 0h untreated |
| 15009571      | ENSECAT0000008688 // IFIH1 // interferon induced with helicase C domain 1 // --- // 10             | IFIH1                                                           | <0,05   | 5.51615     | 6h LPS treated vs 0h untreated |
| 15062669      | NM_001111342 // IL2RA // interleukin 2 receptor, alpha // --- // 100070292 /// ENSECAT0            | IL2RA                                                           | <0,05   | 5.09248     | 6h LPS treated vs 0h untreated |
| 14941638      | XM_001498122 // LOC100068258 // caspase-7-like // --- // 100068258 /// ENSECAT000000169            | CASP7                                                           | <0,05   | 5.08596     | 6h LPS treated vs 0h untreated |
| 15003823      | ENSECAT00000022173 // MBNL2 // muscleblind-like splicing regulator 2 // --- // --- ///             | MBNL2                                                           | <0,05   | 4.80805     | 6h LPS treated vs 0h untreated |
| 14932458      | ENSECAT0000008486 // MKI67 // antigen identified by monoclonal antibody Ki-67 // --- /             | MKI67                                                           | <0,05   | 4.68105     | 6h LPS treated vs 0h untreated |
| 14927299      | ---                                                                                                | intronic normalisation control                                  | <0,05   | 4.58106     | 6h LPS treated vs 0h untreated |
| 15062095      | ENSECAT00000013248 // MASTL // microtubule associated serine/threonine kinase-like // -            | MASTL                                                           | <0,05   | 4.56881     | 6h LPS treated vs 0h untreated |
| 15024680      | XM_001496658 // LOC100066364 // ubiquitin-like protein ISG15-like // --- // 100066364 /            | ISG15                                                           | <0,05   | 4.54354     | 6h LPS treated vs 0h untreated |
| 15070556      | XM_001915080 // HERC5 // HECT and RLD domain containing E3 ubiquitin protein ligase 5 /            | HERC5                                                           | <0,05   | 4.53092     | 6h LPS treated vs 0h untreated |
| 14932468      | XM_001489412 // MKI67 // antigen identified by monoclonal antibody Ki-67 // --- // 1000            | MKI67                                                           | <0,05   | 4.5084      | 6h LPS treated vs 0h untreated |
| 15007054      | XM_001497253 // LASS6 // ceramide synthase 6 // --- // 100052305 /// ENSECAT00000020702            | LASS6                                                           | <0,05   | 4.4782      | 6h LPS treated vs 0h untreated |
| 15012275      | ENSECAT00000024871 // LOC100068279 // uncharacterized LOC100068279 // --- // 100068279             | LOC100068279                                                    | <0,05   | 4.30006     | 6h LPS treated vs 0h untreated |
| 14995783      | XM_001490400 // ARHGEF3 // Rho guanine nucleotide exchange factor (GEF) 3 // --- // 100            | ARHGEF3                                                         | <0,05   | 4.24659     | 6h LPS treated vs 0h untreated |
| 14999300      | ENSECAT00000023515 // ITPR1 // inositol 1,4,5-trisphosphate receptor, type 1 // --- //             | ITPR1                                                           | <0,05   | 4.19797     | 6h LPS treated vs 0h untreated |
| 15107741      | XM_001504918 // AMPD3 // adenosine monophosphate deaminase 3 // --- // 100055812 /// EN            | AMPD3                                                           | <0,05   | 4.17472     | 6h LPS treated vs 0h untreated |
| 15004722      | XM_001915424 // STARD13 // STARD13 // STARD-related lipid transfer (START) domain containing 13 // | STARD13                                                         | <0,05   | 4.15431     | 6h LPS treated vs 0h untreated |
| 15090605      | ENSECAT00000013398 // LOC100058797 // SLAM family member 7-like // --- // 100058797 ///            | SLAMF7                                                          | <0,05   | 3.97985     | 6h LPS treated vs 0h untreated |
| 15025944      | ENSECAT00000010490 // LOC100063623 // heat shock 70 kDa protein 4L-like // --- // 10006            | HSPA4L                                                          | <0,05   | 3.90117     | 6h LPS treated vs 0h untreated |
| 15077930      | NM_001082496 // IL6 // interleukin 6 (interferon, beta 2) // --- // 100034196 /// ENSE             | IL6                                                             | <0,05   | 3.88815     | 6h LPS treated vs 0h untreated |
| 15020907      | ENSECAT00000011304 // LOC100072294 // TNFAIP3-interacting protein 3-like // --- // 1000            | TNIP3                                                           | <0,05   | 3.86298     | 6h LPS treated vs 0h untreated |
| 15056863      | XM_001490681 // LOC100050681 // indoleamine 2,3-dioxygenase 1-like // --- // 100050681             | IDO1                                                            | <0,05   | 3.84531     | 6h LPS treated vs 0h untreated |
| 15071093      | ENSECAT00000013283 // CXCL6 // chemokine (C-X-C motif) ligand 6 (granulocyte chemotacti            | CXCL6                                                           | <0,05   | 3.83294     | 6h LPS treated vs 0h untreated |
| 15039165      | ENSECAT00000016226 // RIN2 // Ras and Rab interactor 2 // --- // ---                               | RIN2                                                            | <0,05   | 3.77088     | 6h LPS treated vs 0h untreated |
| 15135534      | ---                                                                                                | server error                                                    | <0,05   | 3.7501      | 6h LPS treated vs 0h untreated |
| 15101861      | ENSECAT00000021874 // LOC100059624 // protein FAM186B-like // --- // 100059624 /// XM_0            | FAM186B                                                         | <0,05   | 3.71437     | 6h LPS treated vs 0h untreated |
| 14986665      | NM_001164063 // TSLP // thymic stromal lymphopoietin // --- // 100302635 /// ENSECAT000            | TSLP                                                            | <0,05   | 3.67319     | 6h LPS treated vs 0h untreated |
| 14960140      | ENSECAT00000012002 // DHX58 // DEXH (Asp-Glu-X-His) box polypeptide 58 // --- // ---               | DHX58                                                           | <0,05   | 3.66283     | 6h LPS treated vs 0h untreated |
| 15028337      | XM_001500225 // PIM1 // pim-1 oncogene // --- // 100053898 /// ENSECAT00000021930 // PI            | PIM1                                                            | <0,05   | 3.60544     | 6h LPS treated vs 0h untreated |
| 15085806      | XM_001915323 // LOC100057148 // interferon-inducible protein AIM2-like // --- // 100057            | AIM2                                                            | <0,05   | 3.58716     | 6h LPS treated vs 0h untreated |
| 15040476      | ENSECAT00000021759 // LOC100070934 // syndecan-4-like // --- // 100070934 /// XM_001500            | SDC4                                                            | <0,05   | 3.58249     | 6h LPS treated vs 0h untreated |
| 14991995      | ENSECAT00000025409 // IL1A // interleukin 1, alpha // --- // 100064969 /// NM_001082500            | IL1A                                                            | <0,05   | 3.57645     | 6h LPS treated vs 0h untreated |
| 15031827      | XM_001502577 // CLIC5 // chloride intracellular channel 5 // --- // 100055661 /// XM_00            | CLIC5                                                           | <0,05   | 3.56439     | 6h LPS treated vs 0h untreated |
| 15126729      | agrin-like (LOC100066334)                                                                          | AGRN                                                            | <0,05   | 3.54987     | 6h LPS treated vs 0h untreated |
| 14996357      | XM_001497081 // UBA7 // ubiquitin-like modifier activating enzyme 7 // --- // 100052809            | UBA7                                                            | <0,05   | 3.48924     | 6h LPS treated vs 0h untreated |
| 15026820      | ENSECAT00000012106 // EDN1 // endothelin 1 // --- // 100034060 /// NM_001163964 // EDN1            | EDN1                                                            | <0,05   | 3.48891     | 6h LPS treated vs 0h untreated |
| 15090521      | XM_001503814 // LOC100066144 // beta-1,4-galactosyltransferase 3-like // --- // 1000661            | B4GalT1                                                         | <0,05   | 3.45945     | 6h LPS treated vs 0h untreated |
| 15113406      | NM_001081897 // ADORA2A // adenosine A2a receptor // --- // 100034039 /// ENSECAT000000            | ADORA2A                                                         | <0,05   | 3.44998     | 6h LPS treated vs 0h untreated |
| 15001015      | ENSECAT0000007282 // TTC21A // tetratricopeptide repeat domain 21A // --- // 100068431             | TTC21A                                                          | <0,05   | 3.39419     | 6h LPS treated vs 0h untreated |
| 15078788      | XM_001501658 // LOC100071801 // tetraspanin-33-like // --- // 100071801 /// ENSECAT0000            | TSPAN33                                                         | <0,05   | 3.37837     | 6h LPS treated vs 0h untreated |
| 15025340      | ENSECAT00000007816 // RAPGEF2 // Rap guanine nucleotide exchange factor (GEF) 2 // ---             | RAPGEF2                                                         | <0,05   | 3.37765     | 6h LPS treated vs 0h untreated |
| 15017252      | XM_001499925 // LOC100070269 // MARCKS-related protein-like // --- // 100070269 /// ENS            | MARCKSL1                                                        | <0,05   | 3.35269     | 6h LPS treated vs 0h untreated |
| 14997412      | XM_003363101 // LOC100054875 // TPR and ankyrin repeat-containing protein 1-like // ---            | hCG2042887                                                      | <0,05   | 3.35195     | 6h LPS treated vs 0h untreated |
| 15027607      | ENSECAT00000020248 // TNF // tumor necrosis factor // --- // 100033834 /// NM_001081819            | TNF                                                             | <0,05   | 3.33386     | 6h LPS treated vs 0h untreated |
| 15072244      | XM_001498785 // LOC100068959 // ADP-ribosyl cyclase 1-like // --- // 100068959 /// ENSE            | CD38                                                            | <0,05   | 3.32044     | 6h LPS treated vs 0h untreated |
| 15052407      | ENSECAT00000024562 // LOC100067589 // n-acetyllactosaminidase alpha-1,3-galactosyltransfe          | A3GALT                                                          | <0,05   | 3.31214     | 6h LPS treated vs 0h untreated |
| 15014775      | XM_001916804 // PARP15 // poly (ADP-ribose) polymerase family, member 15 // --- // 1000            | PARP15                                                          | <0,05   | 3.26386     | 6h LPS treated vs 0h untreated |
| 14945006      | XM_001503166 // LOC100053929 // interferon-stimulated gene 20 kDa protein-like // --- /            | ISG20                                                           | <0,05   | 3.21177     | 6h LPS treated vs 0h untreated |
| 15131305      | ENSECAT00000026113 // LOC100629405 // transmembrane protein 47-like // --- // 100629405            | TMEM47                                                          | <0,05   | 3.19285     | 6h LPS treated vs 0h untreated |
| 15098203      | XM_001916981 // HELB // helicase (DNA) B // --- // 100058069 /// ENSECAT0000007687 //              | HELB                                                            | <0,05   | 3.18387     | 6h LPS treated vs 0h untreated |
| 15015272      | ENSECAT00000020241 // ALCAM // activated leukocyte cell adhesion molecule // --- // 100            | ALCAM                                                           | <0,05   | 3.17569     | 6h LPS treated vs 0h untreated |
| 14999580      | ENSECAT00000022729 // PXK // PX domain containing serine/threonine kinase // --- // 100            | PXK                                                             | <0,05   | 3.12488     | 6h LPS treated vs 0h untreated |
| 15082178      | XM_001500985 // NT5C3 // 5'-nucleotidase, cytosolic III // --- // 100055382 /// ENSECAT            | NT5C3                                                           | <0,05   | 3.10472     | 6h LPS treated vs 0h untreated |
| 14927283      | ---                                                                                                | Intronic normalization control                                  | <0,05   | 3.08807     | 6h LPS treated vs 0h untreated |
| 15093536      | ENSECAT00000005160 // SGIP1 // SH3-domain GRB2-like (endophilin) interacting protein 1             | SGIP1                                                           | <0,05   | 3.05699     | 6h LPS treated vs 0h untreated |
| 15123213      | ENSECAT00000006134 // LOC100061076 // retinol dehydrogenase 10-like // --- // 100061076            | RDH10                                                           | <0,05   | 3.05417     | 6h LPS treated vs 0h untreated |
| 15089938      | ENSECAT00000007693 // LOC100055982 // protein Niban-like // --- // 100055982                       | FAM129A                                                         | <0,05   | 3.04513     | 6h LPS treated vs 0h untreated |

|          |                                                                                          |                                |       |                                           |
|----------|------------------------------------------------------------------------------------------|--------------------------------|-------|-------------------------------------------|
| 15057441 | NM_001081798 // TLR3 // toll-like receptor 3 // --- // 100009703 // ENSECAT00000000204   | TLR3                           | <0,05 | 3.02161 6h LPS treated up vs 0h untreated |
| 15020084 | ENSECAT00000025859 // DDX60L // DEAD (Asp-Glu-Ala-Asp) box polypeptide 60-like // --- // | DDX60L                         | <0,05 | 3.01504 6h LPS treated up vs 0h untreated |
| 14927305 | ---                                                                                      | Intronic normalization control | <0,05 | 3.01463 6h LPS treated up vs 0h untreated |
| 14955254 | ENSECAT00000019105 // LOC100147304 // l-amino-acid oxidase-like // --- // 100147304 //   | LOXL                           | <0,05 | 2.99467 6h LPS treated up vs 0h untreated |
| 15088814 | ENSECAT00000020662 // C1orf141 // chromosome 1 open reading frame 141 // --- //          | C1orf141                       | <0,05 | 2.98896 6h LPS treated up vs 0h untreated |
| 15029016 | ENSECAT00000009130 // ENPP4 // ectonucleotide pyrophosphatase/phosphodiesterase 4 (puta  | ENPP4                          | <0,05 | 2.98884 6h LPS treated up vs 0h untreated |
| 14995340 | ENSECAT00000017447 // FRMD4B // FERM domain containing 4B // --- // 100063494 // XM_00   | FRMD4B                         | <0,05 | 2.98669 6h LPS treated up vs 0h untreated |
| 14927505 | ---                                                                                      | Intronic normalization control | <0,05 | 2.98019 6h LPS treated up vs 0h untreated |
| 15005409 | XM_001496646 // KLF12 // Kruppel-like factor 12 // --- // 100066348 // ENSECAT000000013  | KLF12                          | <0,05 | 2.96813 6h LPS treated up vs 0h untreated |
| 15002294 | XM_001489171 // LOC100050217 // p2Y purinoceptor 13-like // --- // 100050217 // ENSECA   | P2RY13                         | <0,05 | 2.94403 6h LPS treated up vs 0h untreated |
| 14940837 | NM_001127352 // PTGER2 // prostaglandin E receptor 2 (subtype EP2), 53kDa // --- // 100  | PTGER2                         | <0,05 | 2.91721 6h LPS treated up vs 0h untreated |
| 14927511 | ---                                                                                      | Intronic normalization control | <0,05 | 2.90657 6h LPS treated up vs 0h untreated |
| 14951498 | XM_001497344 // LOC100062735 // n-formyl peptide receptor 2-like // --- // 100062735 //  | FPR2                           | <0,05 | 2.90079 6h LPS treated up vs 0h untreated |
| 14999992 | ENSECAT00000020460 // PHF7 // PHD finger protein 7 // --- // 100051872 // XM_001915336   | PHF7                           | <0,05 | 2.86444 6h LPS treated up vs 0h untreated |
| 15071077 | FJ469975 // MIP-2BETA // CXCL3 // --- // 100056258 // NM_001143793 // MIP-2BETA // CXC   | MIP-2BETA                      | <0,05 | 2.85587 6h LPS treated up vs 0h untreated |
| 14927287 | ---                                                                                      | Intronic normalization control | <0,05 | 2.84886 6h LPS treated up vs 0h untreated |
| 15026012 | ENSECAT00000014299 // LOC100063739 // protein sprouty homolog 1-like // --- // 10006373  | SPRY1                          | <0,05 | 2.84698 6h LPS treated up vs 0h untreated |
| 15124336 | ENSECAT00000024988 // EXT1 // exostosin 1 // --- // 100056983                            | EXT1                           | <0,05 | 2.84566 6h LPS treated up vs 0h untreated |
| 14989542 | ENSECAT00000022076 // PNPT1 // polyribonucleotide nucleotidyltransferase 1 // --- // 10  | PNPT1                          | <0,05 | 2.83148 6h LPS treated up vs 0h untreated |
| 15078825 | ENSECAT00000025427 // LOC100071840 // protein FAM40B-like // --- // 100071840            | STRIP2                         | <0,05 | 2.79925 6h LPS treated up vs 0h untreated |
| 15099547 | ENSECAT00000000410 // USP18 // ubiquitin specific peptidase 18 // --- // 100054488 //    | USP18                          | <0,05 | 2.77495 6h LPS treated up vs 0h untreated |
| 15006746 | ENSECAT00000012505 // TSG-6 // tumor necrosis factor alpha-induced protein 6 // --- //   | TSG-6                          | <0,05 | 2.7515 6h LPS treated up vs 0h untreated  |
| 15042300 | XM_001498209 // IFT74 // intraflagellar transport 74 homolog (Chlamydomonas) // --- //   | IFT74                          | <0,05 | 2.74151 6h LPS treated up vs 0h untreated |
| 15048752 | ENSECAT00000019048 // LOC100064733 // tudor domain-containing protein 7-like // --- //   | TDRD7                          | <0,05 | 2.72777 6h LPS treated up vs 0h untreated |
| 15042730 | XM_003363984 // DAPK1 // death-associated protein kinase 1 // --- // 100061567 // ENSE   | DAPK1                          | <0,05 | 2.72707 6h LPS treated up vs 0h untreated |
| 15092673 | ENSECAT00000006182 // LOC100050614 // hippocampus abundant transcript 1 protein-like //  | HIAT1                          | <0,05 | 2.70184 6h LPS treated up vs 0h untreated |
| 14933154 | ENSECAT00000025256 // OBFC1 // oligonucleotide/oligosaccharide-binding fold containing   | OBFC1                          | <0,05 | 2.68367 6h LPS treated up vs 0h untreated |
| 14972800 | XM_001498309 // LOC100066866 // ubiquitin/ISG15-conjugating enzyme E2 L6-like // --- //  | UBE2L6                         | <0,05 | 2.68332 6h LPS treated up vs 0h untreated |
| 15001999 | ENSECAT00000025637 // LOC100062640 // putative glycerol kinase 5-like // --- // 1000626  | GK5                            | <0,05 | 2.67734 6h LPS treated up vs 0h untreated |
| 15085246 | XM_001488889 // LOC100053960 // basic leucine zipper transcriptional factor ATF-like 3-  | BATF3                          | <0,05 | 2.6642 6h LPS treated up vs 0h untreated  |
| 15099134 | ---                                                                                      | SP110                          | <0,05 | 2.66332 6h LPS treated up vs 0h untreated |
| 15093235 | ENSECAT00000009160 // LOC100053034 // interferon-induced protein 44-like // --- // 1000  | IFIH1                          | <0,05 | 2.65989 6h LPS treated up vs 0h untreated |
| 15027108 | ENSECAT00000026293 // LOC100052917 // tripartite motif-containing protein 38-like // --  | TRIM38                         | <0,05 | 2.64657 6h LPS treated up vs 0h untreated |
| 15116792 | XM_001915101 // PHLPP1 // PH domain and leucine rich repeat protein phosphatase 1 // --  | PHLPP1                         | <0,05 | 2.64222 6h LPS treated up vs 0h untreated |
| 14927303 | ---                                                                                      | Intronic normalization control | <0,05 | 2.62594 6h LPS treated up vs 0h untreated |
| 15002158 | XM_001492309 // LOC100051043 // phospholipid scramblase 2-like // --- // 100051043 //    | PLSCR2                         | <0,05 | 2.61209 6h LPS treated up vs 0h untreated |
| 15077669 | XM_001495201 // LOC100064230 // glucocorticoid-induced transcript 1 protein-like // ---  | GLCC11                         | <0,05 | 2.60872 6h LPS treated up vs 0h untreated |
| 15039788 | XM_001498301 // LOC100068461 // forkhead box protein S1-like // --- // 100068461 // EN   | FOXS1                          | <0,05 | 2.60638 6h LPS treated up vs 0h untreated |
| 15053690 | ENSECAT00000024147 // LOC100147361 // ubiquitin carboxyl-terminal hydrolase 25-like //   | USP25                          | <0,05 | 2.58797 6h LPS treated up vs 0h untreated |
| 15071771 | ENSECAT00000014115 // LIMCH1 // LIM and calponin homology domains 1 // --- // 100063373  | LIMCH1                         | <0,05 | 2.58409 6h LPS treated up vs 0h untreated |
| 15004028 | ENSECAT00000021044 // TNFSF13B // tumor necrosis factor (ligand) superfamily, member 13  | TNFSF13B                       | <0,05 | 2.57504 6h LPS treated up vs 0h untreated |
| 15122715 | ENSECAT00000015748 // GSDMD // gasdermin D // --- //                                     | GSDMD                          | <0,05 | 2.56986 6h LPS treated up vs 0h untreated |
| 15041928 | XM_001492663 // LOC100051487 // tyrosine-protein kinase JAK2-like // --- // 100051487 // | JAK2                           | <0,05 | 2.56883 6h LPS treated up vs 0h untreated |
| 15077811 | XM_001497221 // ITGB8 // integrin, beta 8 // --- // 100053462 // ENSECAT00000020530 //   | ITGB8                          | <0,05 | 2.55911 6h LPS treated up vs 0h untreated |
| 15004168 | ENSECAT00000018395 // MCF2L // MCF2 cell line derived transforming sequence-like // --   | MCF2L                          | <0,05 | 2.55818 6h LPS treated up vs 0h untreated |
| 15051507 | XM_001495095 // LOC100064095 // tripartite motif-containing protein 14-like // --- // 1  | TRIM14                         | <0,05 | 2.55557 6h LPS treated up vs 0h untreated |
| 14942041 | ENSECAT00000021368 // NFKB // nuclear factor of kappa light polypeptide gene enhancer i  | NFKB                           | <0,05 | 2.55553 6h LPS treated up vs 0h untreated |
| 15031349 | ENSECAT00000015230 // LOC100063827 // transcription factor ETV7-like // --- // 10006382  | ETV7                           | <0,05 | 2.55344 6h LPS treated up vs 0h untreated |
| 15052916 | NM_001081935 // PTGES // prostaglandin E synthase // --- // 100034143 // ENSECAT0000000  | PTGES                          | <0,05 | 2.55166 6h LPS treated up vs 0h untreated |
| 14958362 | ENSECAT00000028931 // SOCS3 // suppressor of cytokine signaling 3 // --- // 100050730 // | SOCS3                          | <0,05 | 2.54775 6h LPS treated up vs 0h untreated |
| 14964112 | ---                                                                                      | RNF213-201                     | <0,05 | 2.5474 6h LPS treated up vs 0h untreated  |
| 15134804 | ---                                                                                      | Server error                   | <0,05 | 2.5327 6h LPS treated up vs 0h untreated  |
| 14927263 | ---                                                                                      | Intronic normalization control | <0,05 | 2.52193 6h LPS treated up vs 0h untreated |
| 15111156 | ENSECAT00000014969 // ICAM1 // intercellular adhesion molecule 1 // --- //               | ICAM1                          | <0,05 | 2.51711 6h LPS treated up vs 0h untreated |
| 14936622 | XM_001487956 // LOC100049938 // bcl-2-related protein A1-like // --- // 100049938 // E   |                                | <0,05 | 2.49914 6h LPS treated up vs 0h untreated |
| 15126730 | agrin-like (LOC100066334)                                                                | AGRN                           | <0,05 | 2.48772 6h LPS treated up vs 0h untreated |
| 14927285 | ---                                                                                      | Intronic normalization control | <0,05 | 2.48722 6h LPS treated up vs 0h untreated |
| 15073643 | XM_001493567 // NEK7 // NIMA (never in mitosis gene a)-related kinase 7 // --- // 10006  | NEK7                           | <0,05 | 2.48376 6h LPS treated up vs 0h untreated |
| 14927289 | ---                                                                                      | Intronic normalization control | <0,05 | 2.47403 6h LPS treated up vs 0h untreated |
| 14968155 | ENSECAT00000026927 // LOC100072742 // f-box only protein 39-like // --- // 100072742 //  | FBXO39                         | <0,05 | 2.47164 6h LPS treated up vs 0h untreated |
| 15118424 | NM_001081757 // OAS3 // 2'-5'-oligoadenylate synthetase 3, 100kDa // --- // 791225 //    | OAS3                           | <0,05 | 2.46756 6h LPS treated up vs 0h untreated |
| 14974973 | XM_001497712 // LOC100067741 // uncharacterized LOC100067741 // --- // 100067741 // EN   | LOC100067741                   | <0,05 | 2.46087 6h LPS treated up vs 0h untreated |
| 15135080 | ---                                                                                      | server error                   | <0,05 | 2.45819 6h LPS treated up vs 0h untreated |
| 15126646 | ---                                                                                      | OAS1                           | <0,05 | 2.44752 6h LPS treated up vs 0h untreated |
| 14943690 | XM_001498209 // IFT74 // intraflagellar transport 74 homolog (Chlamydomonas) // --- //   | IFT74                          | <0,05 | 2.44415 6h LPS treated up vs 0h untreated |
| 15126645 | ---                                                                                      | OAS1                           | <0,05 | 2.44153 6h LPS treated up vs 0h untreated |
| 14995322 | ENSECAT00000009612 // FOXP1 // forkhead box P1 // --- // 100053199 // XM_003363048 //    | FOXP1                          | <0,05 | 2.43876 6h LPS treated up vs 0h untreated |

|          |                                                                                          |                                |       |                                           |
|----------|------------------------------------------------------------------------------------------|--------------------------------|-------|-------------------------------------------|
| 15092177 | XM_001499121 // MOV10 // Mov10, Moloney leukemia virus 10, homolog (mouse) // --- // 10  | MOV10                          | <0,05 | 2.42589 6h LPS treated up vs 0h untreated |
| 15089212 | ENSECAT0000009338 // IL10 // interleukin 10 // --- // 100034187 /// NM_001082490 // IL   | IL10                           | <0,05 | 2.41699 6h LPS treated up vs 0h untreated |
| 15000485 | ENSECAT00000011071 // LOC100063767 // three prime repair exonuclease 1-like // --- // 1  | TREX1                          | <0,05 | 2.41554 6h LPS treated up vs 0h untreated |
| 14939007 | ENSECAT00000018492 // LOC100071046 // EH domain-containing protein 4-like // --- // 100  | EHD4                           | <0,05 | 2.4101 6h LPS treated up vs 0h untreated  |
| 15107064 | XM_001496305 // FCHSD2 // FCH and double SH3 domains 2 // --- // 100065828 /// ENSECAT0  | FCHSD2                         | <0,05 | 2.40257 6h LPS treated up vs 0h untreated |
| 14975351 | NM_001257087 // TRIM56 // tripartite motif containing 56 // --- // 100060136 // ENSECA   | TRIM56                         | <0,05 | 2.38897 6h LPS treated up vs 0h untreated |
| 15114130 | XM_001488377 // LOC100052508 // 54 kDa 2'-5'-oligoadenylate synthase-like protein 2-lik  | OAS2                           | <0,05 | 2.38382 6h LPS treated up vs 0h untreated |
| 14969876 | ---                                                                                      | UCHL5                          | <0,05 | 2.38006 6h LPS treated up vs 0h untreated |
| 15134772 | ---                                                                                      | server error                   | <0,05 | 2.37559 6h LPS treated up vs 0h untreated |
| 15080843 | ENSECAT00000019802 // MYO1G // myosin IG // --- // 100052077                             | MYO1G                          | <0,05 | 2.36945 6h LPS treated up vs 0h untreated |
| 14927509 | ---                                                                                      | Intronic normalization control | <0,05 | 2.36462 6h LPS treated up vs 0h untreated |
| 15066609 | XM_001915658 // RASGEF1B // RasGEF domain family, member 1B // --- // 100146797 /// ENS  | RASGEF1B                       | <0,05 | 2.34918 6h LPS treated up vs 0h untreated |
| 15098090 | ENSECAT00000012670 // SRGAP1 // SLIT-ROBO Rho GTPase activating protein 1 // --- // 100  | SRGAP1                         | <0,05 | 2.34424 6h LPS treated up vs 0h untreated |
| 14945899 | ENSECAT00000006078 // PML // promyelocytic leukemia // --- // 100062744 /// XM_00149324  | PML                            | <0,05 | 2.33403 6h LPS treated up vs 0h untreated |
| 15020540 | ENSECAT000000025178 // OTUD4 // OTU domain containing 4 // --- // 100070999 /// XM_00150 | OTUD4                          | <0,05 | 2.3282 6h LPS treated up vs 0h untreated  |
| 15070957 | XM_001491674 // LOC100051425 // cyclin-G2-like // --- // 100051425 /// ENSECAT000000151  | CCNG2                          | <0,05 | 2.32705 6h LPS treated up vs 0h untreated |
| 14943011 | ENSECAT0000000977 // SLC16A9 // solute carrier family 16, member 9 (monocarboxylic aci   | SLC16A9                        | <0,05 | 2.32546 6h LPS treated up vs 0h untreated |
| 15030361 | ENSECAT00000017994 // TRIM26 // tripartite motif containing 26 // --- // 100051726 ///   | TRIM26                         | <0,05 | 2.32091 6h LPS treated up vs 0h untreated |
| 15105518 | ENSECAT00000023734 // APLP2 // amyloid beta (A4) precursor-like protein 2 // --- // 100  | APLP2                          | <0,05 | 2.31706 6h LPS treated up vs 0h untreated |
| 15054457 | ENSECAT00000025586 // TRPM2 // transient receptor potential cation channel, subfamily M  | TRPM2                          | <0,05 | 2.31084 6h LPS treated up vs 0h untreated |
| 15012672 | XM_001500006 // HEG1 // HEG homolog 1 (zebrafish) // --- // 100070351 /// ENSECAT0000000 | HEG1                           | <0,05 | 2.31056 6h LPS treated up vs 0h untreated |
| 15070754 | XM_001915383 // CDS1 // CDP-diaclyglycerol synthase (phosphatidate cytidyl)transferase   | CDS1                           | <0,05 | 2.30686 6h LPS treated up vs 0h untreated |
| 15114137 | NM_001081797 // OASL // 2'-5'-oligoadenylate synthetase-like // --- // 100009702 /// EN  | OASL                           | <0,05 | 2.30237 6h LPS treated up vs 0h untreated |
| 14954367 | XM_001501644 // LOC100065387 // carcinoembryonic antigen-related cell adhesion molecule  | CEACAM1                        | <0,05 | 2.29995 6h LPS treated up vs 0h untreated |
| 14957111 | XM_001504045 // TRAF3IP2 // TRAF3 interacting protein 2 // --- // 100066812 /// ENSECAT  | TRAF3IP2                       | <0,05 | 2.29906 6h LPS treated up vs 0h untreated |
| 15041225 | ---                                                                                      | HELZ2-201                      | <0,05 | 2.28108 6h LPS treated up vs 0h untreated |
| 15085004 | ENSECAT00000022005 // RGL1 // ral guanine nucleotide dissociation stimulator-like 1 //   | RGL1                           | <0,05 | 2.27802 6h LPS treated up vs 0h untreated |
| 14927301 | ---                                                                                      | Intronic normalization control | <0,05 | 2.26701 6h LPS treated up vs 0h untreated |
| 15096318 | ENSECAT00000009829 // LRMP // lymphoid-restricted membrane protein // --- // 100068768   | LRMP                           | <0,05 | 2.26077 6h LPS treated up vs 0h untreated |
| 15047758 | XM_001496017 // FOXN3 // forkhead box N3 // --- // 100052973 /// ENSECAT00000029020 //   | FOXN3                          | <0,05 | 2.25344 6h LPS treated up vs 0h untreated |
| 15071082 | ---                                                                                      | CXCL3                          | <0,05 | 2.24871 6h LPS treated up vs 0h untreated |
| 15043736 | NM_001099440 // IFNB1 // interferon, beta 1, fibroblast // --- // 100052545              | IFNB1                          | <0,05 | 2.23857 6h LPS treated up vs 0h untreated |
| 14927261 | ---                                                                                      | Intronic normalization control | <0,05 | 2.23488 6h LPS treated up vs 0h untreated |
| 15081436 | NM_001256925 // SAMD9 // sterile alpha motif domain containing 9 // --- // 100051216 //  | SAMD9                          | <0,05 | 2.2337 6h LPS treated up vs 0h untreated  |
| 15022470 | XM_001498965 // LOC100069173 // ribonuclease ZC3H12A-like // --- // 100069173 /// ENSEC  | ZC3H12A                        | <0,05 | 2.23156 6h LPS treated up vs 0h untreated |
| 15012340 | ENSECAT00000015618 // CCDC50 // coiled-coil domain containing 50 // --- // ---           | CCDC50                         | <0,05 | 2.23147 6h LPS treated up vs 0h untreated |
| 15116856 | XM_003365564 // SERPINB2 // serpin peptidase inhibitor, clade B (ovalbumin), member 2 /  | SERPINB2                       | <0,05 | 2.22603 6h LPS treated up vs 0h untreated |
| 14966186 | ENSECAT00000016804 // LOC100069660 // guanine nucleotide-binding protein G(I)/G(S)/G(O)  | GNGT2                          | <0,05 | 2.22421 6h LPS treated up vs 0h untreated |
| 15013994 | XM_001495276 // GNB4 // guanine nucleotide binding protein (G protein), beta polypeptid  | GNB4                           | <0,05 | 2.22047 6h LPS treated up vs 0h untreated |
| 15014789 | ENSECAT00000009985 // LOC100060632 // e3 ubiquitin-protein ligase DTX3L-like // --- //   | DTX3L                          | <0,05 | 2.20388 6h LPS treated up vs 0h untreated |
| 15108349 | XM_001502780 // LOC100072747 // transmembrane gamma-carboxyglutamic acid protein 4-like  | PRRG4                          | <0,05 | 2.18858 6h LPS treated up vs 0h untreated |
| 15108822 | ENSECAT00000022192 // RFX2 // regulatory factor X, 2 (influences HLA class II expressio  | RFX2                           | <0,05 | 2.18822 6h LPS treated up vs 0h untreated |
| 15069675 | XM_001498568 // LOC100068748 // mixed lineage kinase domain-like protein-like // --- //  | MLKL                           | <0,05 | 2.17659 6h LPS treated up vs 0h untreated |
| 15090753 | ---                                                                                      | IF16                           | <0,05 | 2.1721 6h LPS treated up vs 0h untreated  |
| 15128810 | ENSECAT00000003070 // LOC100072611 // putative P2Y purinoceptor 10-like // --- // 10007  | P2RY10                         | <0,05 | 2.1657 6h LPS treated up vs 0h untreated  |
| 15061584 | XM_001488742 // CERK // ceramide kinase // --- // 100053604 /// ENSECAT00000005822 // C  | CERK                           | <0,05 | 2.15171 6h LPS treated up vs 0h untreated |
| 15131515 | XM_001917800 // SLC9A7 // solute carrier family 9, subfamily A (NHE7, cation proton ant  | SLC9A7                         | <0,05 | 2.15089 6h LPS treated up vs 0h untreated |
| 14969784 | XM_001490897 // LOC100051253 // oxysterols receptor LXR-alpha-like // --- // 100051253   | LXR-a                          | <0,05 | 2.15072 6h LPS treated up vs 0h untreated |
| 15079967 | ENSECAT00000023822 // NUB1 // negative regulator of ubiquitin-like proteins 1 // --- //  | NUB1                           | <0,05 | 2.14782 6h LPS treated up vs 0h untreated |
| 15134318 | ---                                                                                      | server error                   | <0,05 | 2.1403 6h LPS treated up vs 0h untreated  |
| 15104100 | XM_001916286 // BIRC2 // baculoviral IAP repeat containing 2 // --- // 100061273 /// EN  | BIRC2                          | <0,05 | 2.13557 6h LPS treated up vs 0h untreated |
| 15058331 | ENSECAT00000026768 // APAF1 // apoptotic peptidase activating factor 1 // --- // 100052  | APAF1                          | <0,05 | 2.12972 6h LPS treated up vs 0h untreated |
| 14960466 | XM_001500159 // SMARCE1 // SWI/SNF related, matrix associated, actin dependent regulato  | SMARCE1                        | <0,05 | 2.12603 6h LPS treated up vs 0h untreated |
| 14950558 | XM_003362328 // PVRL2 // poliovirus receptor-related 2 (herpesvirus entry mediator B) /  | PVRL2                          | <0,05 | 2.12582 6h LPS treated up vs 0h untreated |
| 15038286 | NM_001081902 // CD40 // CD40 molecule, TNF receptor superfamily member 5 // --- // 1000  | CD40                           | <0,05 | 2.12287 6h LPS treated up vs 0h untreated |
| 15112614 | XM_001500797 // DENND5A // DENN/MADD domain containing 5A // --- // 100071112 /// ENSEC  | DENND5A                        | <0,05 | 2.12277 6h LPS treated up vs 0h untreated |
| 14990274 | ENSECAT00000015187 // LOC100054688 // xanthine dehydrogenase/oxidase-like // --- // 100  | XDH                            | <0,05 | 2.11953 6h LPS treated up vs 0h untreated |
| 14937807 | ENSECAT00000026465 // MYO1E // myosin IE // --- // 100068162                             | MYO1E                          | <0,05 | 2.11603 6h LPS treated up vs 0h untreated |
| 15107397 | XM_003365380 // LOC100054490 // tripartite motif-containing protein 5-like // --- // 10  | TRIM5                          | <0,05 | 2.10442 6h LPS treated up vs 0h untreated |
| 14997779 | XM_001494698 // RFTN1 // raftlin, lipid raft linker 1 // --- // 100063495 /// ENSECAT00  | RFTN1                          | <0,05 | 2.10286 6h LPS treated up vs 0h untreated |
| 15126728 | XM_001917428 // LOC100066334 // agrin-like // --- // 100066334 /// ENSECAT00000012181 /  | AGR                            | <0,05 | 2.10101 6h LPS treated up vs 0h untreated |
| 15027038 | ENSECAT00000021472 // LOC100629805 // acyl-coenzyme A thioesterase 13-like // --- // 10  | ACOT13                         | <0,05 | 2.101 6h LPS treated up vs 0h untreated   |
| 15054174 | XM_001491467 // MX2 // myxovirus (influenza virus) resistance 2 (mouse) // --- // 10005  | MX2                            | <0,05 | 2.10037 6h LPS treated up vs 0h untreated |
| 14927277 | ---                                                                                      | Intronic normalization control | <0,05 | 2.09666 6h LPS treated up vs 0h untreated |
| 15075633 | XM_001916048 // LOC100067364 // transcription factor HIVEP2-like // --- // 100067364 //  | HIVEP2                         | <0,05 | 2.0951 6h LPS treated up vs 0h untreated  |
| 15118881 | XM_001493015 // LOC100060900 // RILP-like protein 2-like // --- // 100060900 /// ENSECA  | RILPL2                         | <0,05 | 2.08838 6h LPS treated up vs 0h untreated |
| 15101868 | ENSECAT00000007057 // FMNL3 // formin-like 3 // --- // 100059687 /// XM_001492200 // FM  | FMNL3                          | <0,05 | 2.08206 6h LPS treated up vs 0h untreated |

|          |                                                                                          |                                |              |       |                                              |
|----------|------------------------------------------------------------------------------------------|--------------------------------|--------------|-------|----------------------------------------------|
| 15134794 | ---                                                                                      |                                | server error | <0,05 | 2.07957 6h LPS treated up vs 0h untreated    |
| 14974104 | XM_001492289 // CHKA // choline kinase alpha // --- // 100059839 /// ENSECAT00000012200  | CHKA                           |              | <0,05 | 2.06411 6h LPS treated up vs 0h untreated    |
| 14972150 | ENSECAT00000016926 // LOC100067133 // excitatory amino acid transporter 2-like // --- /  | SLC7A5P2                       |              | <0,05 | 2.06138 6h LPS treated up vs 0h untreated    |
| 15053920 | ENSECAT00000014380 // LOC100062926 // intersectin-1-like // --- // 100062926             | ITSN1                          |              | <0,05 | 2.06087 6h LPS treated up vs 0h untreated    |
| 15086428 | ENSECAT00000002639 // ADAR // adenosine deaminase, RNA-specific // --- // ---            | ADAR                           |              | <0,05 | 2.057 6h LPS treated up vs 0h untreated      |
| 15082491 | ENSECAT00000008802 // LOC100071408 // protein FAM3C-like // --- // 100071408 /// XM_001  | FAM3C                          |              | <0,05 | 2.05462 6h LPS treated up vs 0h untreated    |
| 15066307 | ENSECAT00000005398 // PPM1K // protein phosphatase, Mg2+/Mn2+ dependent, 1K // --- // 1  | PPM1K                          |              | <0,05 | 2.05354 6h LPS treated up vs 0h untreated    |
| 15076386 | ENSECAT00000000196 // LOC100066798 // syntaxin-11-like // --- // 100066798 /// XM_00150  | STX11                          |              | <0,05 | 2.0489 6h LPS treated up vs 0h untreated     |
| 15065381 | ENSECAT000000011105 // LOC100055378 // telomeric repeat-binding factor 2-interacting pro | TERF2IP                        |              | <0,05 | 2.04694 6h LPS treated up vs 0h untreated    |
| 14953223 | ENSECAT000000023472 // LOC100067512 // a-kinase anchor protein 7 isoform gamma-like // - | AKAP7                          |              | <0,05 | 2.04252 6h LPS treated up vs 0h untreated    |
| 14966919 | ENSECAT00000018440 // SLFN5 // schlafen family member 5 // --- // 100071635              | SLFN5                          |              | <0,05 | 2.03586 6h LPS treated up vs 0h untreated    |
| 15128819 | XM_001501384 // GPR174 // G protein-coupled receptor 174 // --- // 100071745 /// ENSECA  | GPR174                         |              | <0,05 | 2.03504 6h LPS treated up vs 0h untreated    |
| 15026884 | ENSECAT000000024669 // LOC100065723 // GMP reductase 1-like // --- // 100065723 /// XM_0 | GMPR                           |              | <0,05 | 2.02472 6h LPS treated up vs 0h untreated    |
| 14955063 | XM_001489167 // PLEKHA4 // pleckstrin homology domain containing, family A (phosphoinos  | PLEKHA4                        |              | <0,05 | 2.02303 6h LPS treated up vs 0h untreated    |
| 14933789 | ENSECAT00000016733 // BLNK // B-cell linker // --- // 100070841                          | BLNK                           |              | <0,05 | 2.02151 6h LPS treated up vs 0h untreated    |
| 15025773 | XM_001915633 // GAB1 // GRB2-associated binding protein 1 // --- // 100062924 /// ENSEC  | GAB1                           |              | <0,05 | 2.02083 6h LPS treated up vs 0h untreated    |
| 15038468 | XM_001488269 // PTPN1 // protein tyrosine phosphatase, non-receptor type 1 // --- // 10  | PTPN1                          |              | <0,05 | 2.02059 6h LPS treated up vs 0h untreated    |
| 15130048 | ENSECAT00000007861 // DDX26B // DEAD/H (Asp-Glu-Ala-Asp/His) box polypeptide 26B // ---  | DDX26B                         |              | <0,05 | 2.02018 6h LPS treated up vs 0h untreated    |
| 15124307 | XM_001496042 // TRPS1 // trichorhinophalangeal syndrome 1 // --- // 100056821 /// ENSEC  | TRPS1                          |              | <0,05 | 2.01117 6h LPS treated up vs 0h untreated    |
| 15126656 |                                                                                          | IL1B                           |              | <0,05 | 2.00708 6h LPS treated up vs 0h untreated    |
| 15098031 | ENSECAT000000024728 // USP15 // ubiquitin specific peptidase 15 // --- // 100055857      | USP15                          |              | <0,05 | 2.00621 6h LPS treated up vs 0h untreated    |
| 14969486 | ENSECAT000000021443 // PRR5L // proline rich 5 like // --- // 100052234 /// XM_001488316 | PRR5L                          |              | <0,05 | 2.00438 6h LPS treated up vs 0h untreated    |
| 14954767 | XM_001917363 // LOC100146913 // neutral amino acid transporter B(0)-like // --- // 1001  | SLC1A5                         |              | <0,05 | -2.00761 6h LPS treated down vs 0h untreated |
| 14957654 | XM_003362372 // LOC100073151 // serine/threonine-protein kinase Sgk1-like // --- // 100  | Sgk1                           |              | <0,05 | -2.02089 6h LPS treated down vs 0h untreated |
| 14945010 | ENSECAT000000021485 // AEN // apoptosis enhancing nuclease // --- // ---                 | AEN                            |              | <0,05 | -2.06747 6h LPS treated down vs 0h untreated |
| 14971846 | XM_001917602 // LOC100146758 // patatin-like phospholipase domain-containing protein 2-  | PNPLA2                         |              | <0,05 | -2.07838 6h LPS treated down vs 0h untreated |
| 15068182 | XM_001499798 // LOC100070117 // wolframin-like // --- // 100070117 /// ENSECAT0000000137 | WFS1                           |              | <0,05 | -2.08333 6h LPS treated down vs 0h untreated |
| 14967281 | ENSECAT00000006927 // SLC46A1 // solute carrier family 46 (folate transporter), member   | SLC46A1                        |              | <0,05 | -2.12738 6h LPS treated down vs 0h untreated |
| 15026677 | XM_001490360 // ROK1 // RIO kinase 1 (yeast) // --- // 100050980 /// ENSECAT00000000957  | ROK1                           |              | <0,05 | -2.14655 6h LPS treated down vs 0h untreated |
| 14932187 | ---                                                                                      | Intronic normalization control |              | <0,05 | -2.25422 6h LPS treated down vs 0h untreated |
| 15064847 | XM_001498913 // PLA2G15 // phospholipase A2, group XV // --- // 100053908 /// ENSECAT00  | PLA2G15                        |              | <0,05 | -2.34886 6h LPS treated down vs 0h untreated |
| 15126975 | NM_001081771 // TLR7 // toll-like receptor 7 // --- // 791248 /// ENSECAT00000007908 //  | TLR7                           |              | <0,05 | -2.38297 6h LPS treated down vs 0h untreated |
| 15095766 | ENSECAT00000001427 // PTPN6 // protein tyrosine phosphatase, non-receptor type 6 // ---  | PTPN6                          |              | <0,05 | -2.45451 6h LPS treated down vs 0h untreated |
| 14972866 | ENSECAT00000000688 // LPXN // leupaxin // --- // 100066577 /// XM_001504694 // LPXN //   | LPXN                           |              | <0,05 | -2.46798 6h LPS treated down vs 0h untreated |
| 15106911 | ENSECAT000000019345 // ARRB1 // arrestin, beta 1 // --- // 100064657                     | ARRB1                          |              | <0,05 | -2.47078 6h LPS treated down vs 0h untreated |
| 15094354 | ENSECAT000000006171 // LOC100056612 // 2-acylglycerol O-acyltransferase 1-like // --- // | MOGAT1                         |              | <0,05 | -2.59006 6h LPS treated down vs 0h untreated |
| 15073546 | ENSECAT000000012594 // RGS2 // regulator of G-protein signaling 2, 24kDa // --- // 10005 | RGS2                           |              | <0,05 | -2.61257 6h LPS treated down vs 0h untreated |
| 15071057 | XM_001490281 // LOC100056605 // proepiregulin-like // --- // 100056605 /// ENSECAT00000  | EREG                           |              | <0,05 | -2.7328 6h LPS treated down vs 0h untreated  |
| 14998968 | ENSECAT000000017857 // LOC100051258 // peroxisome proliferator-activated receptor gamma- | PPARG                          |              | <0,05 | -2.88641 6h LPS treated down vs 0h untreated |
| 15032122 | ENSECAT000000018852 // GCLC // glutamate-cysteine ligase, catalytic subunit // --- // 10 | GCLC                           |              | <0,05 | -2.90054 6h LPS treated down vs 0h untreated |
| 15124723 | ENSECAT000000025889 // LOC100068961 // src-like-adaptor-like // --- // 100068961 /// XM_ | SLA                            |              | <0,05 | -3.12657 6h LPS treated down vs 0h untreated |
| 15015651 | XM_001488028 // LOC100049896 // lipid phosphate phosphohydrolase 3-like // --- // 10004  | PPAP2BL                        |              | <0,05 | -4.17601 6h LPS treated down vs 0h untreated |
